# Supplementary material for: Hyper-truncated Asn355- and Asn391-glycans modulate the activity of neutrophil granule myeloperoxidase
Source: PubMed Central journal article supplement (PMC7857493; doi:10.1074/jbc.ra120.016342), 2020-12-10

# Supplementary Data

for

## Hyper-truncated Asn355- and Asn391-glycans modulate the activity of neutrophil granule myeloperoxidase

**Harry C. Tjondro<sup>a,b,1</sup>, Julian Ugonotti<sup>a,b,1</sup>, Rebeca Kawahara<sup>a,b,1</sup>, Sayantani Chatterjee<sup>a,b,1</sup>, Ian Loke<sup>c</sup>, Siyun Chen<sup>d</sup>, Fabian Soltermann<sup>d</sup>, Hannes Hinneburg<sup>a,b</sup>, Benjamin L. Parker<sup>e</sup>, Vignesh Venkatakrisnan<sup>f</sup>, Regis Dieckmann<sup>f</sup>, Oliver C. Grant<sup>g</sup>, Johan Bylund<sup>h</sup>, Alison Rodger<sup>a,b</sup>, Robert J. Woods<sup>g</sup>, Anna Karlsson-Bengtsson<sup>f,i</sup>, Weston B. Struwe<sup>d</sup>, Morten Thaysen-Andersen<sup>a,b\*</sup>**

<sup>a</sup>*Department of Molecular Sciences, Macquarie University, Sydney, NSW, Australia*

<sup>b</sup>*Biomolecular Discovery Research Centre, Macquarie University, Sydney, NSW, Australia*

<sup>c</sup>*Cordlife Group Limited, Singapore, Singapore*

<sup>d</sup>*Department of Chemistry, University of Oxford, Oxford, United Kingdom*

<sup>e</sup>*Department of Physiology, University of Melbourne, Melbourne, VIC, Australia*

<sup>f</sup>*Department of Rheumatology & Inflammation Research, Institute of Medicine, Sahlgrenska Academy, University of Gothenburg, Gothenburg, Sweden*

<sup>g</sup>*Complex Carbohydrate Research Center, University of Georgia, Athens, Georgia, United States*

<sup>h</sup>*Department of Oral Microbiology and Immunology, Institute of Odontology, Sahlgrenska Academy, University of Gothenburg, Gothenburg, Sweden*

<sup>i</sup>*Department of Biology and Biological Engineering, Chalmers University of Technology, Gothenburg, Sweden*

<sup>1</sup>*Contributed equally*

**\*Corresponding author:**

Dr Morten Thaysen-Andersen, PhD

Department of Molecular Sciences - Macquarie University, NSW-2109, Sydney, Australia

Ph: +61 2 9850 7487 - Email: [morten.andersen@mq.edu.au](mailto:morten.andersen@mq.edu.au)



## **Supplementary Data S1**

Manually annotated PGC-LC-ESI-CID-MS/MS (-) spectra of reduced *N*-glycans (alditols) released from nMPO

# Glycan #1

Observed  $m/z$  571.24 (1-), RT: ~17.8 min  
[M-H]<sup>-</sup> 571.23 Da

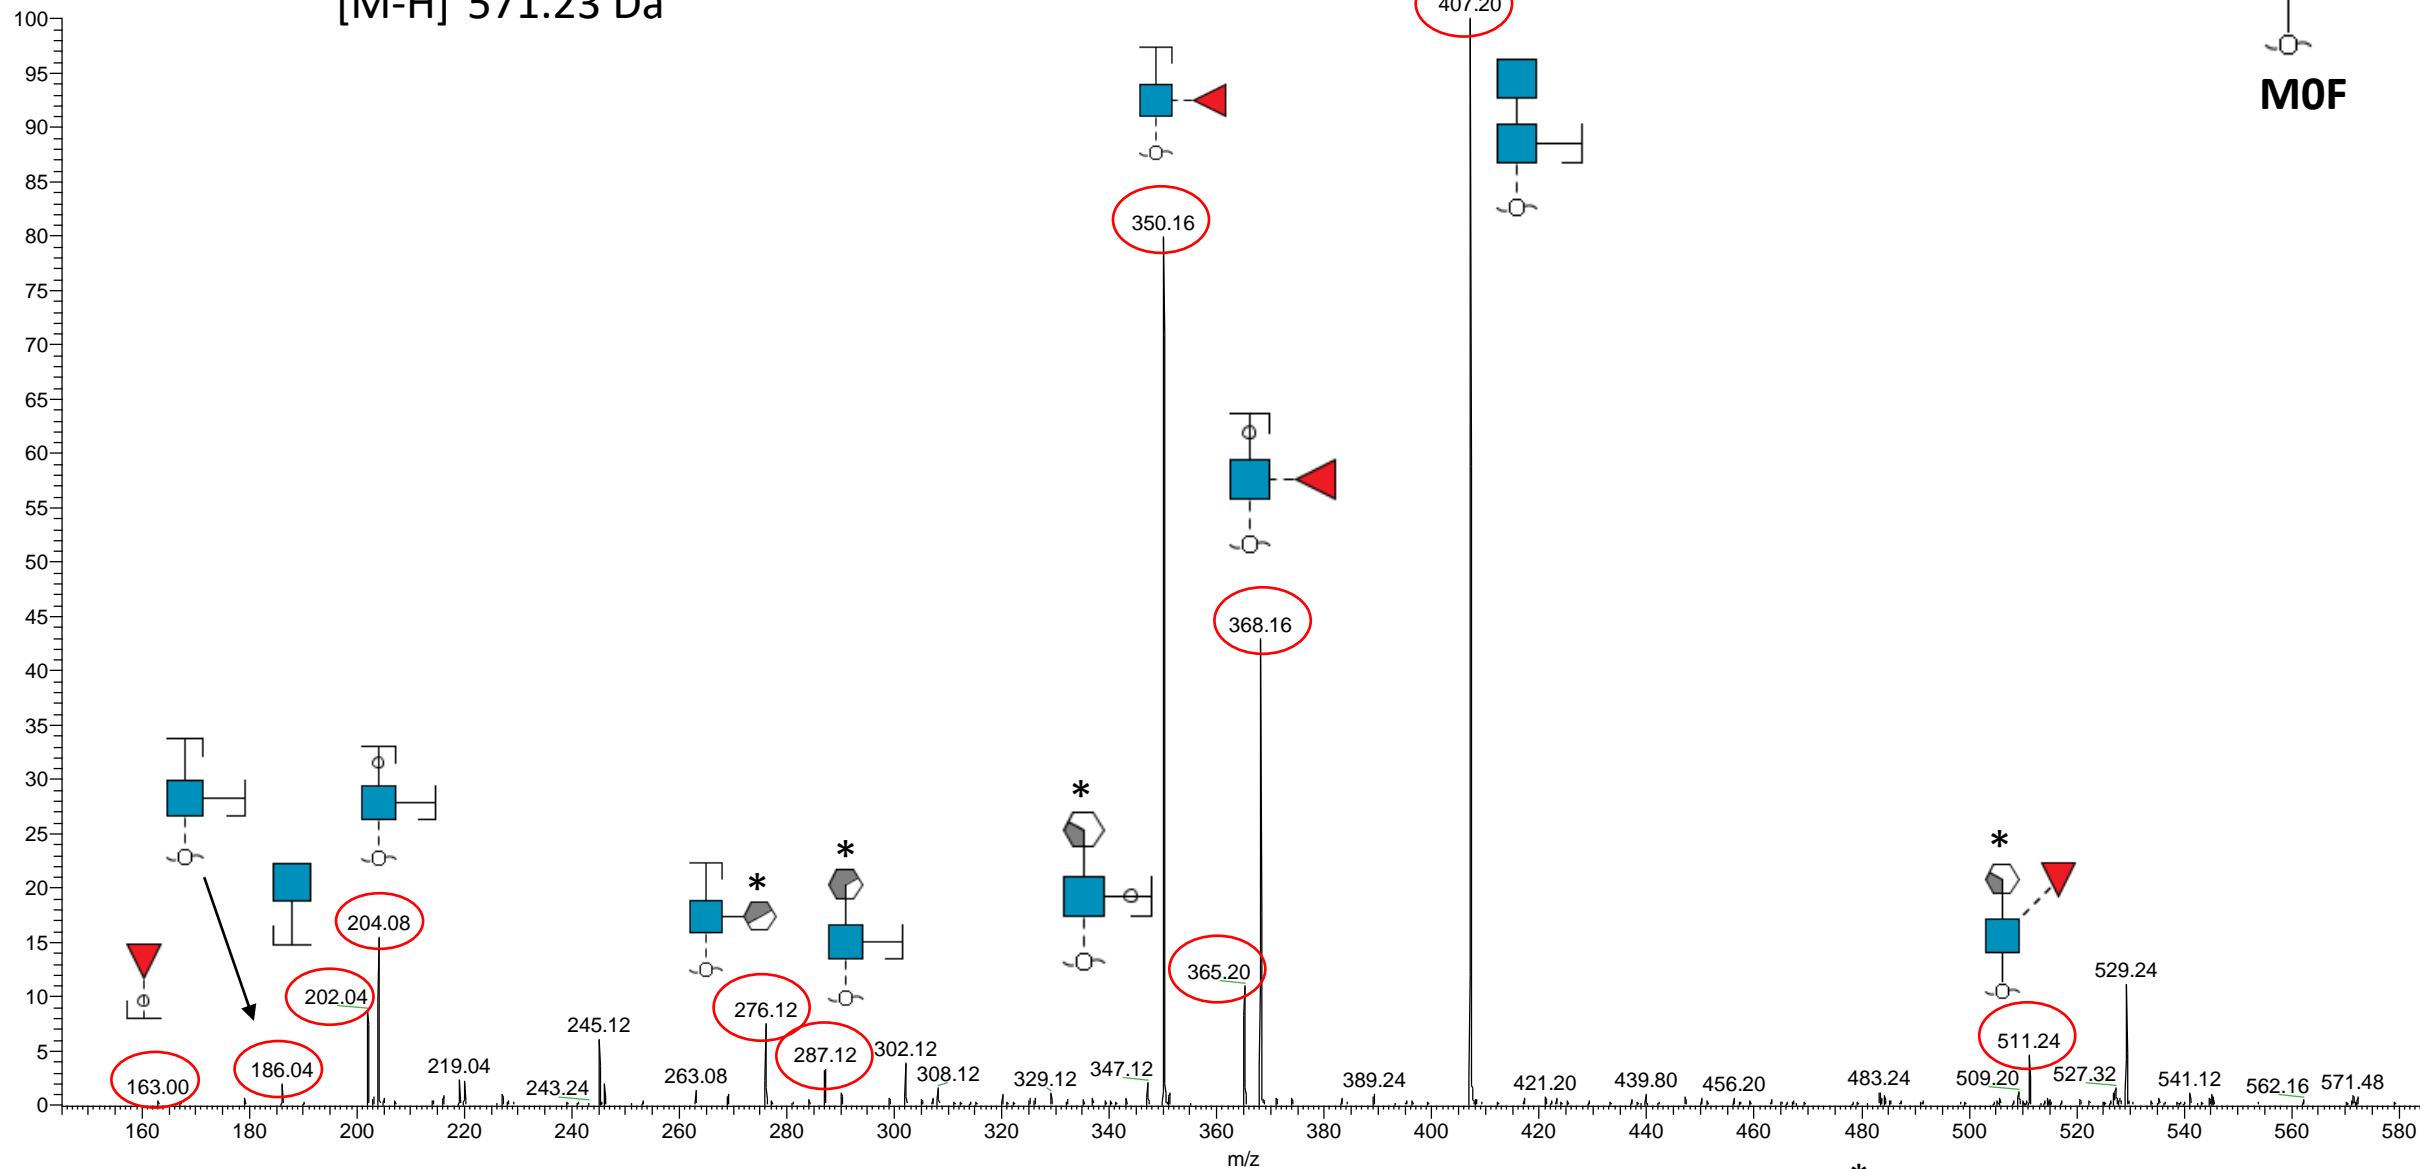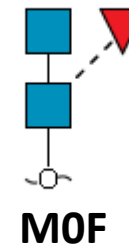

\* Ambiguity of the cross-ring fragments

# Glycan #2

Observed  $m/z$  587.30 (1-), RT: ~16.9 min  
[M-H]<sup>-</sup> 587.23 Da

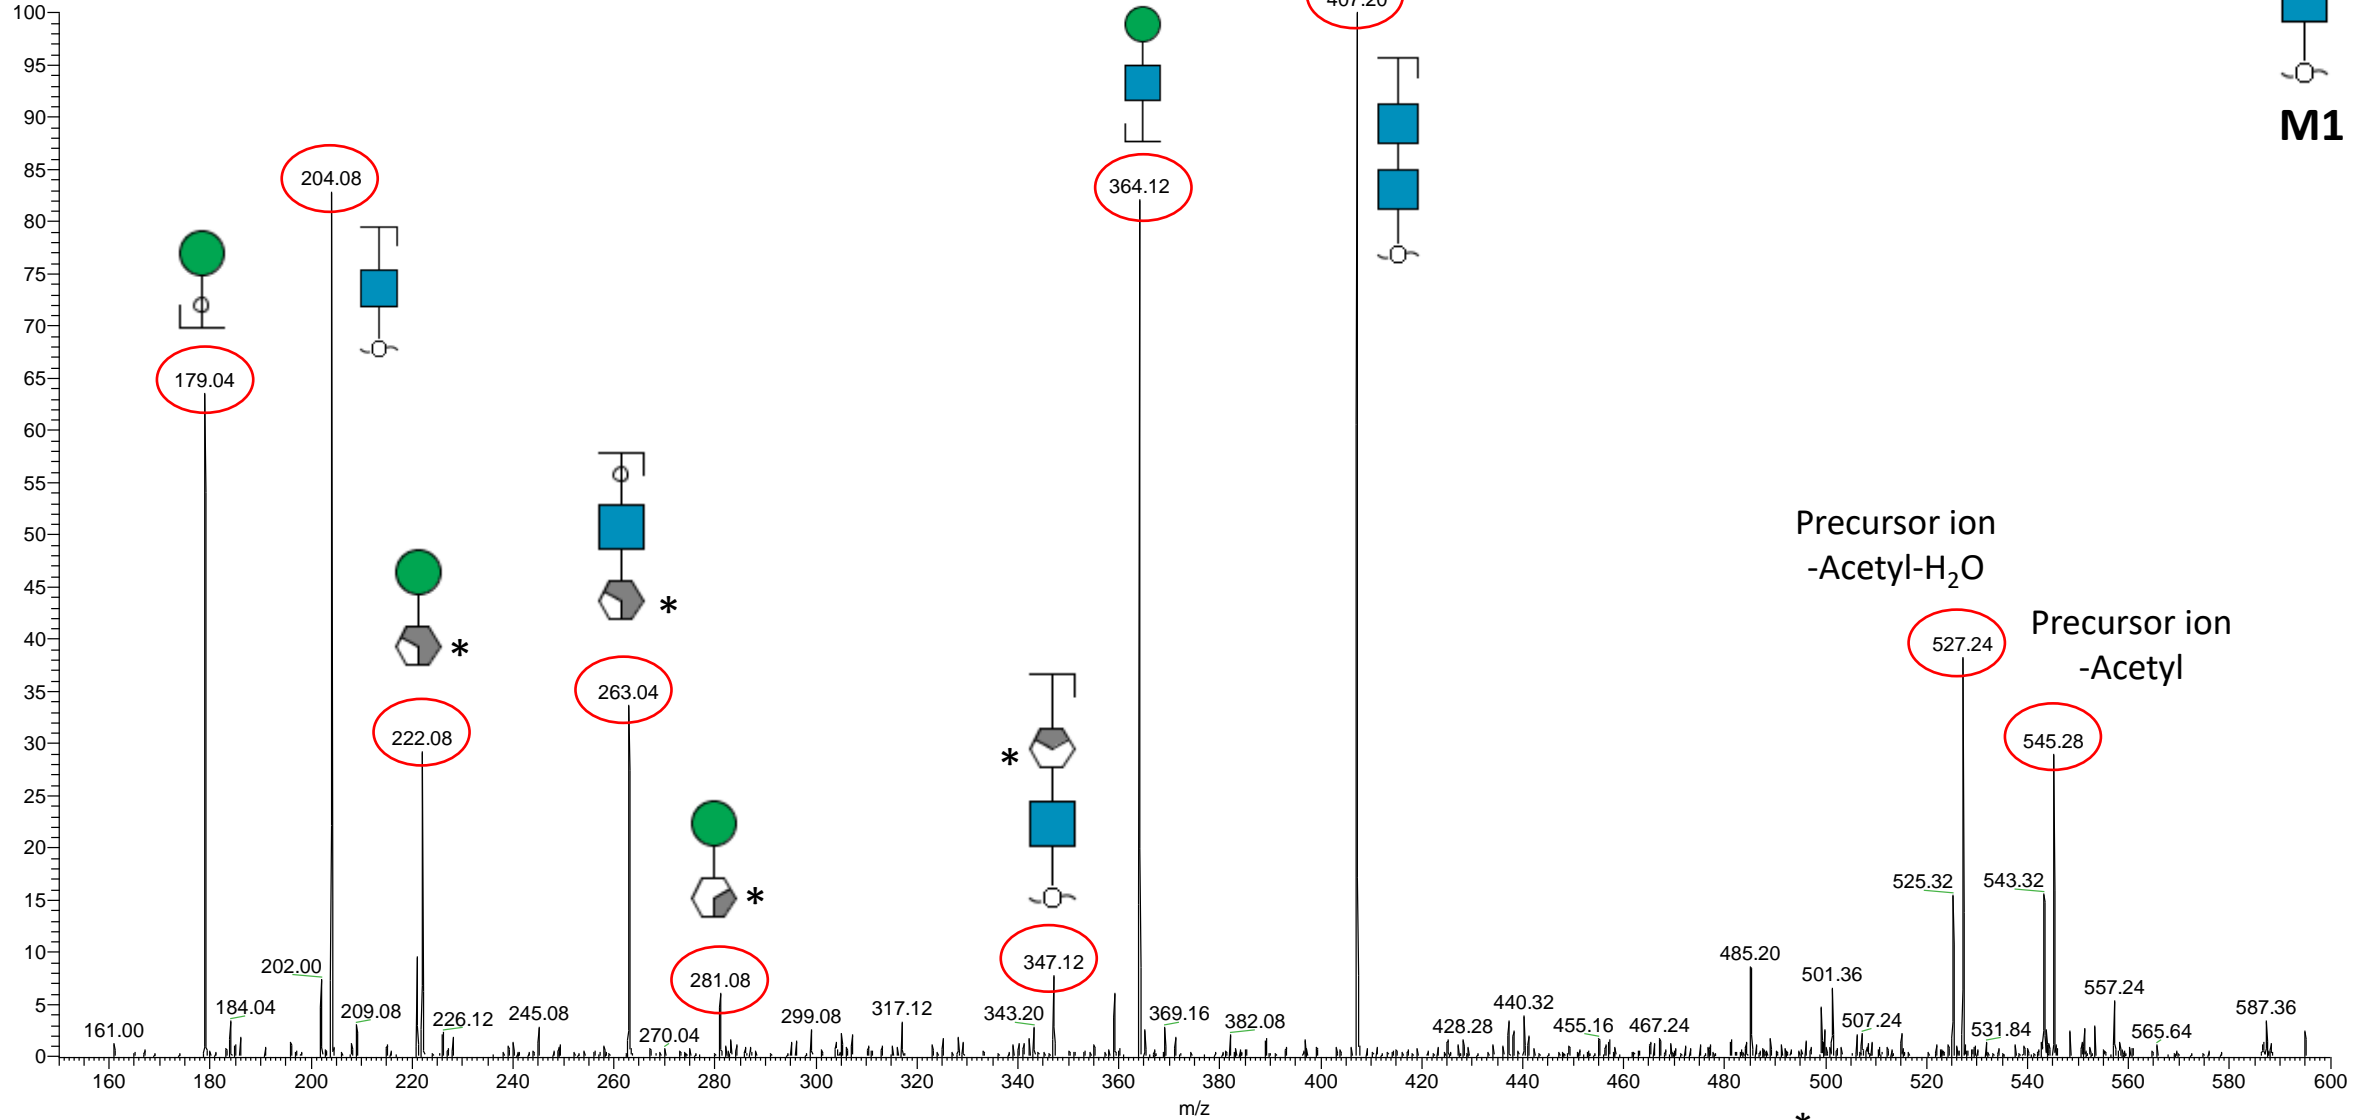

Precursor ion  
-Acetyl-H<sub>2</sub>O

Precursor ion  
-Acetyl

\* Ambiguity of the cross-ring fragments

# Glycan #3

Observed  $m/z$  733.36 (1-), RT: ~21.1 min  
[M-H]<sup>-</sup> 733.28 Da

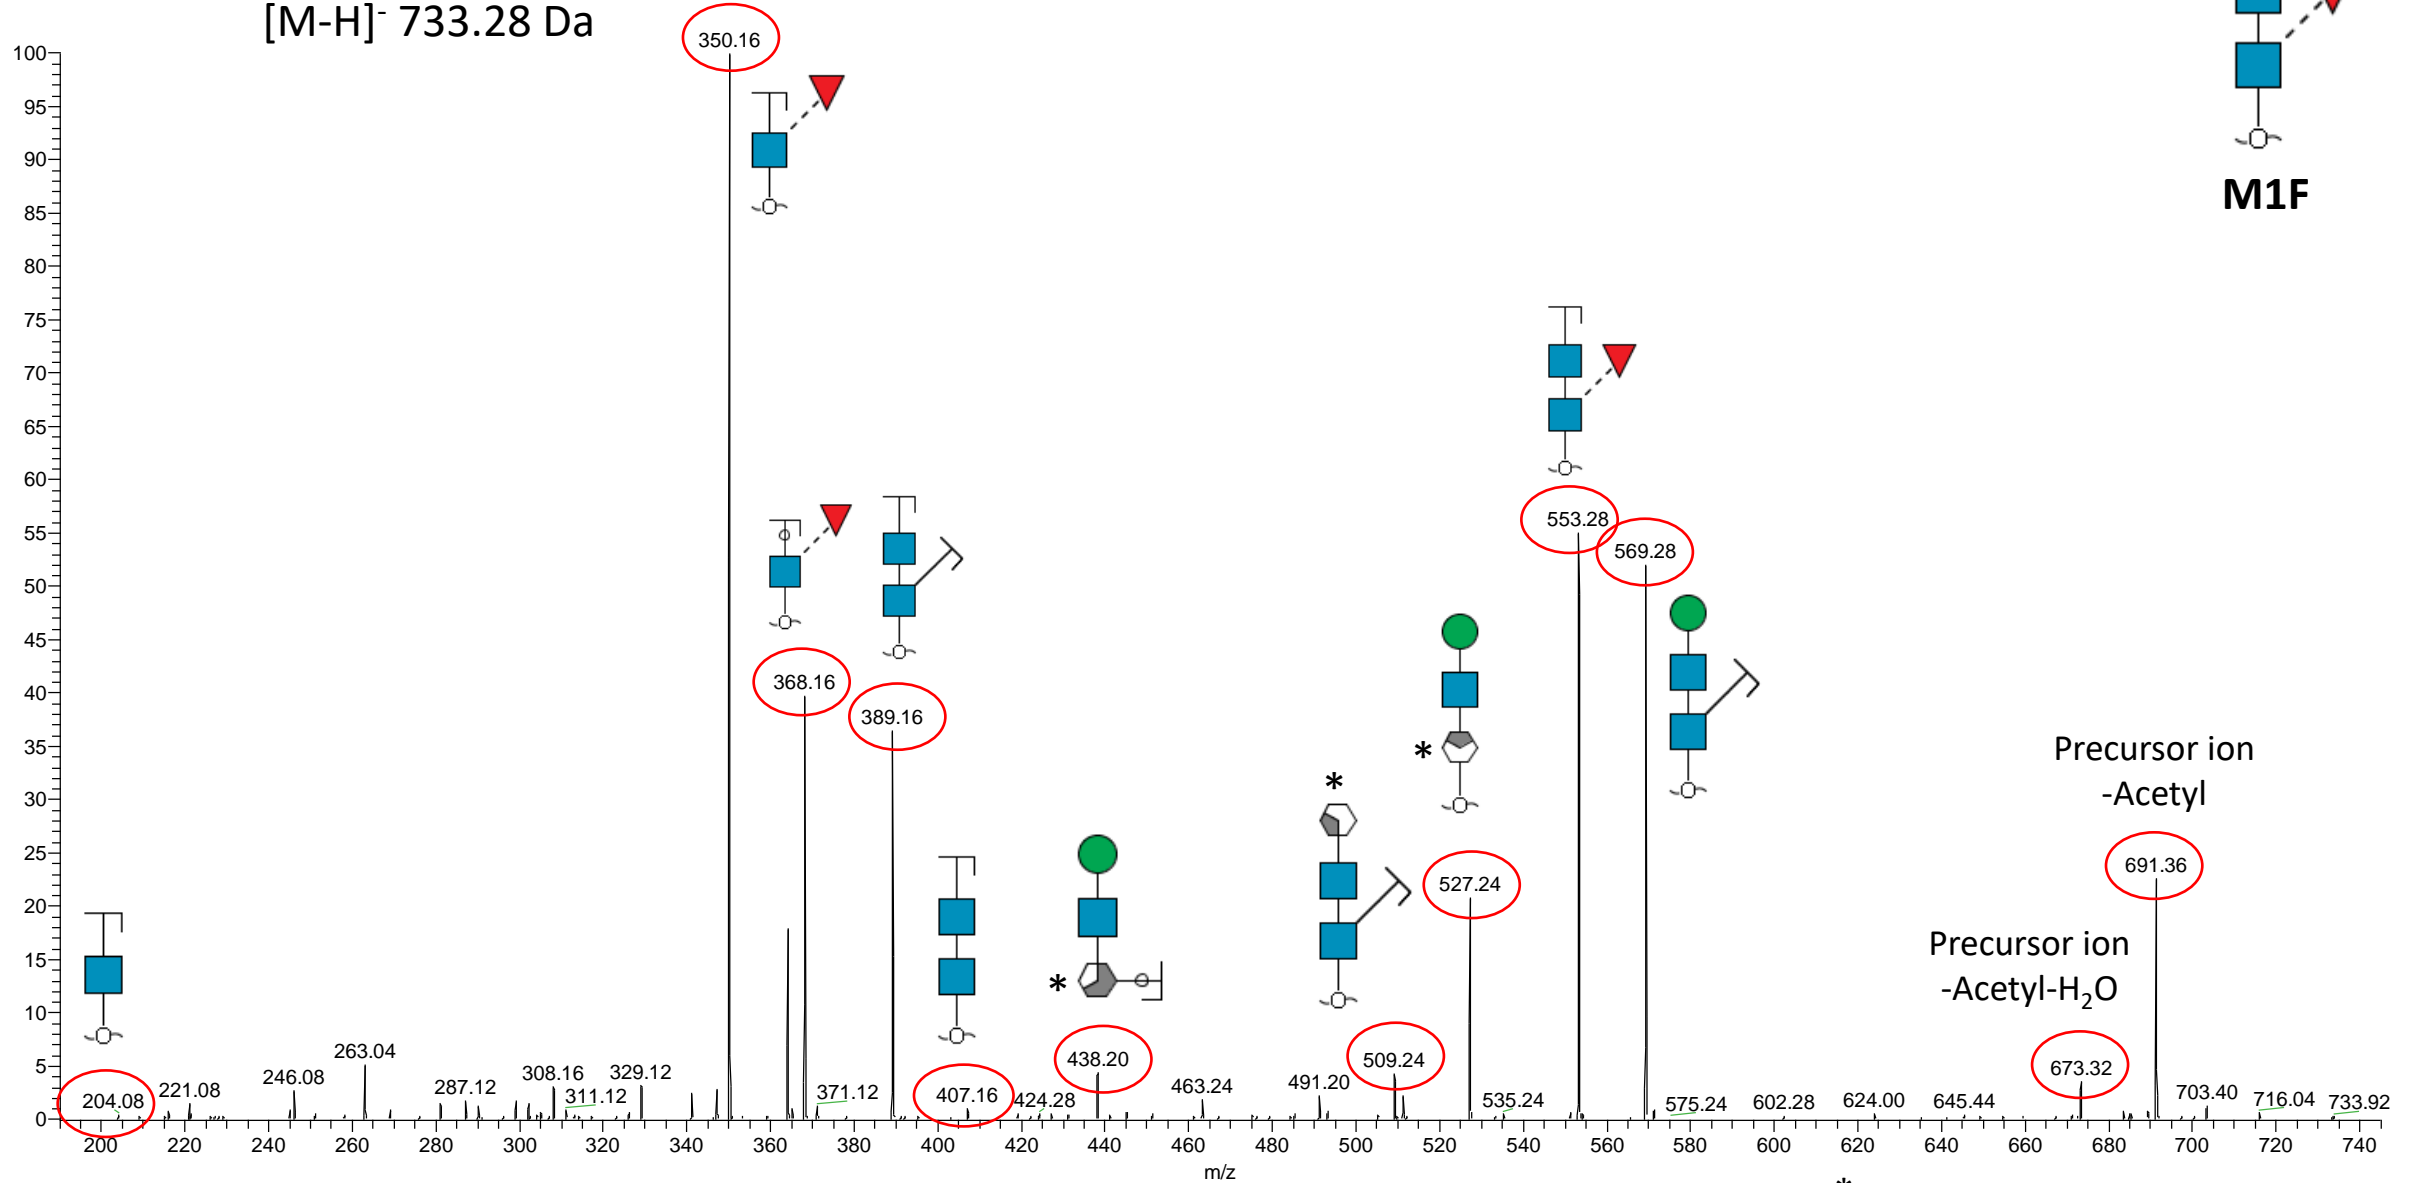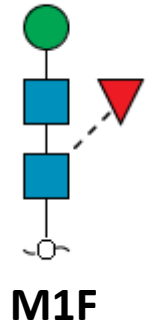

\* Ambiguity of the cross-ring fragments

# Glycan #4

Observed  $m/z$  749.36 (1-), RT: ~18.4 min  
[M-H]<sup>-</sup> 749.28 Da

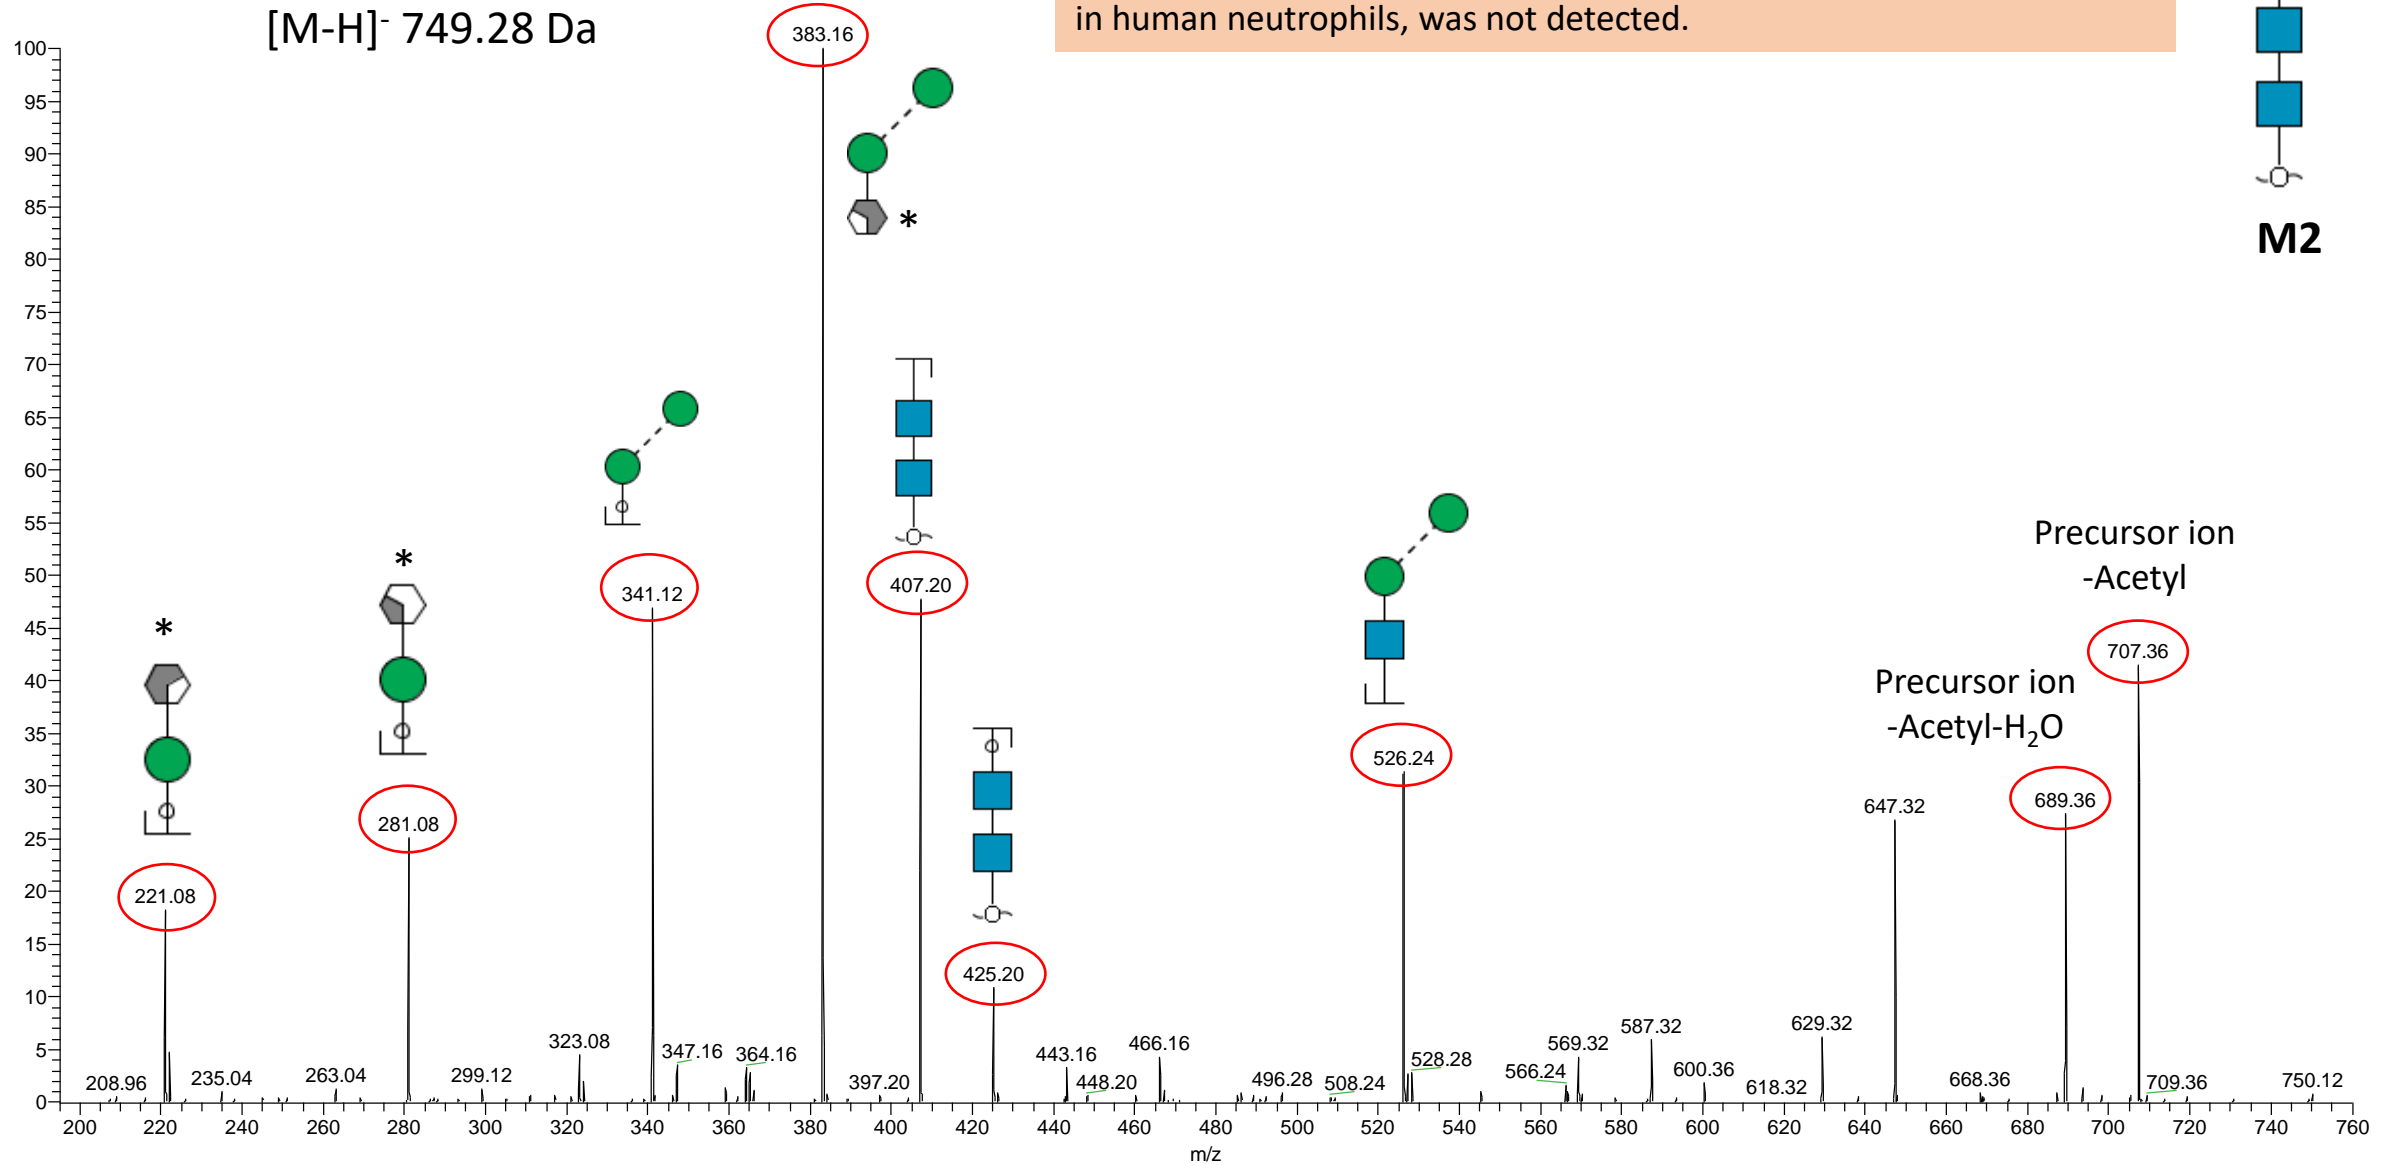

Note: Only one isomer was observed for M2, which is biosynthetically predicted to be  $\alpha$ 1,6-linkage isomer based on experience with neutrophil glycosylation. The  $\alpha$ 1,3-isomer, typically of lower abundance in human neutrophils, was not detected.

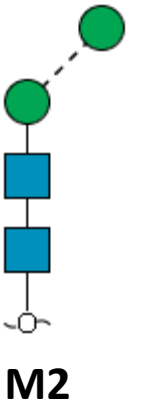

\* Ambiguity of the cross-ring fragments

# Glycan #5a

Note: Identified as the  $\alpha$ 1,6-Man isomer based on PGC LC elution time, its high abundance and experience with neutrophil *N*-glycosylation.

Observed  $m/z$  895.46 (1-), RT: ~24.3 min  
[M-H]<sup>-</sup> 895.34 Da

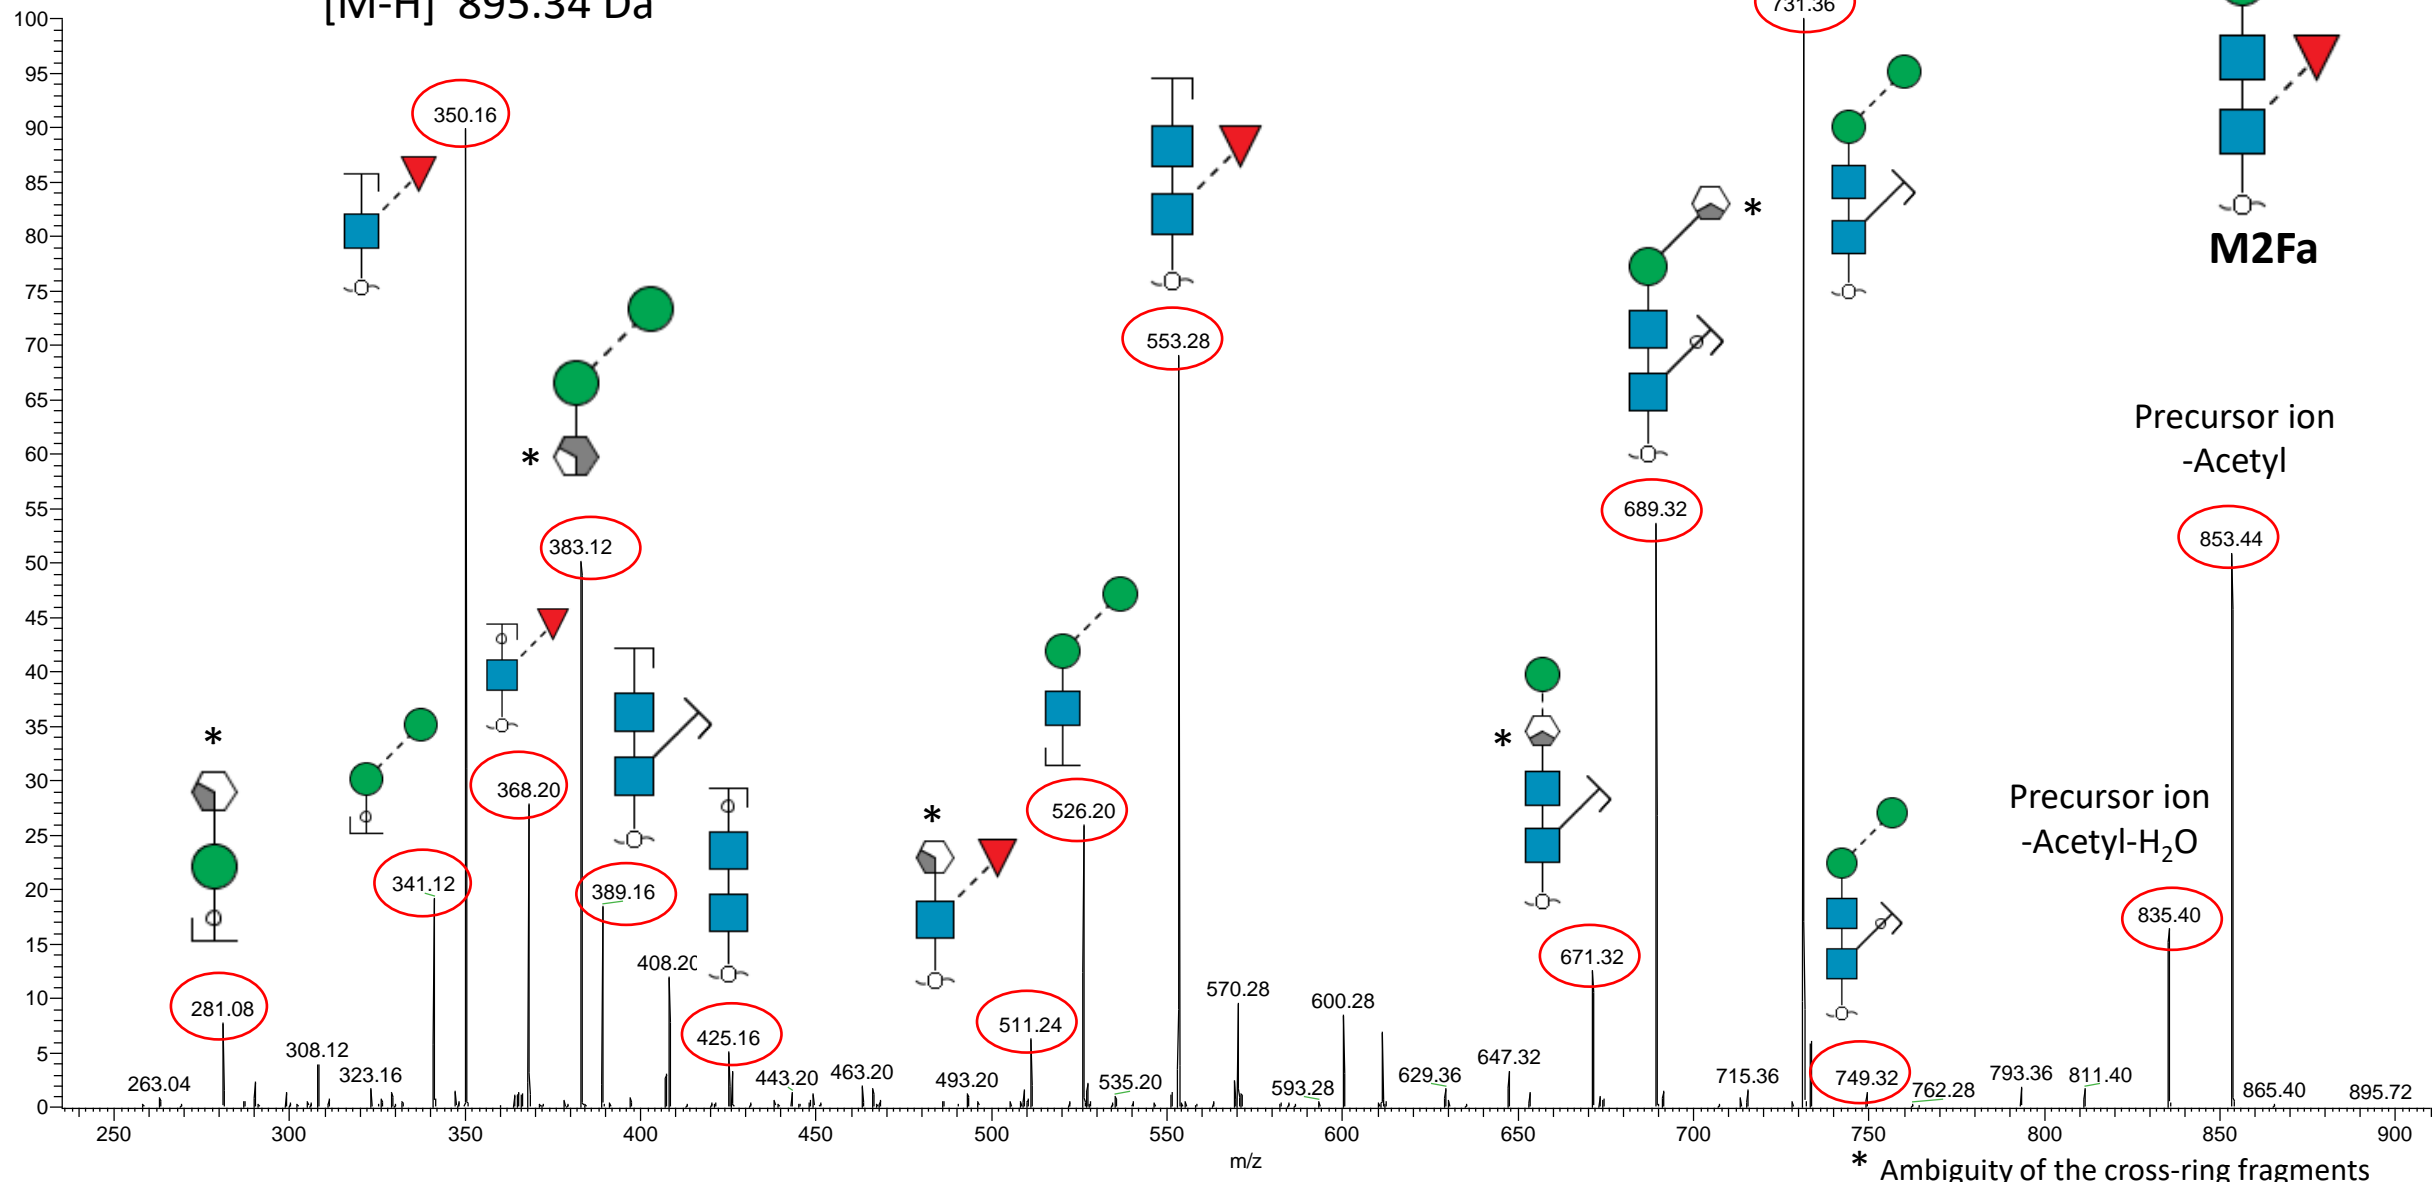

M2Fa

Precursor ion  
-Acetyl

Precursor ion  
-Acetyl-H<sub>2</sub>O

\* Ambiguity of the cross-ring fragments



# Glycan #5b

Note: This low abundance glycan was annotated as the  $\alpha$ 1,3-Man isomer based on PGC LC elution time and experience with neutrophil N-glycosylation.

Observed  $m/z$  895.46 (1-), RT: ~26.4 min  
[M-H]<sup>-</sup> 895.34 Da

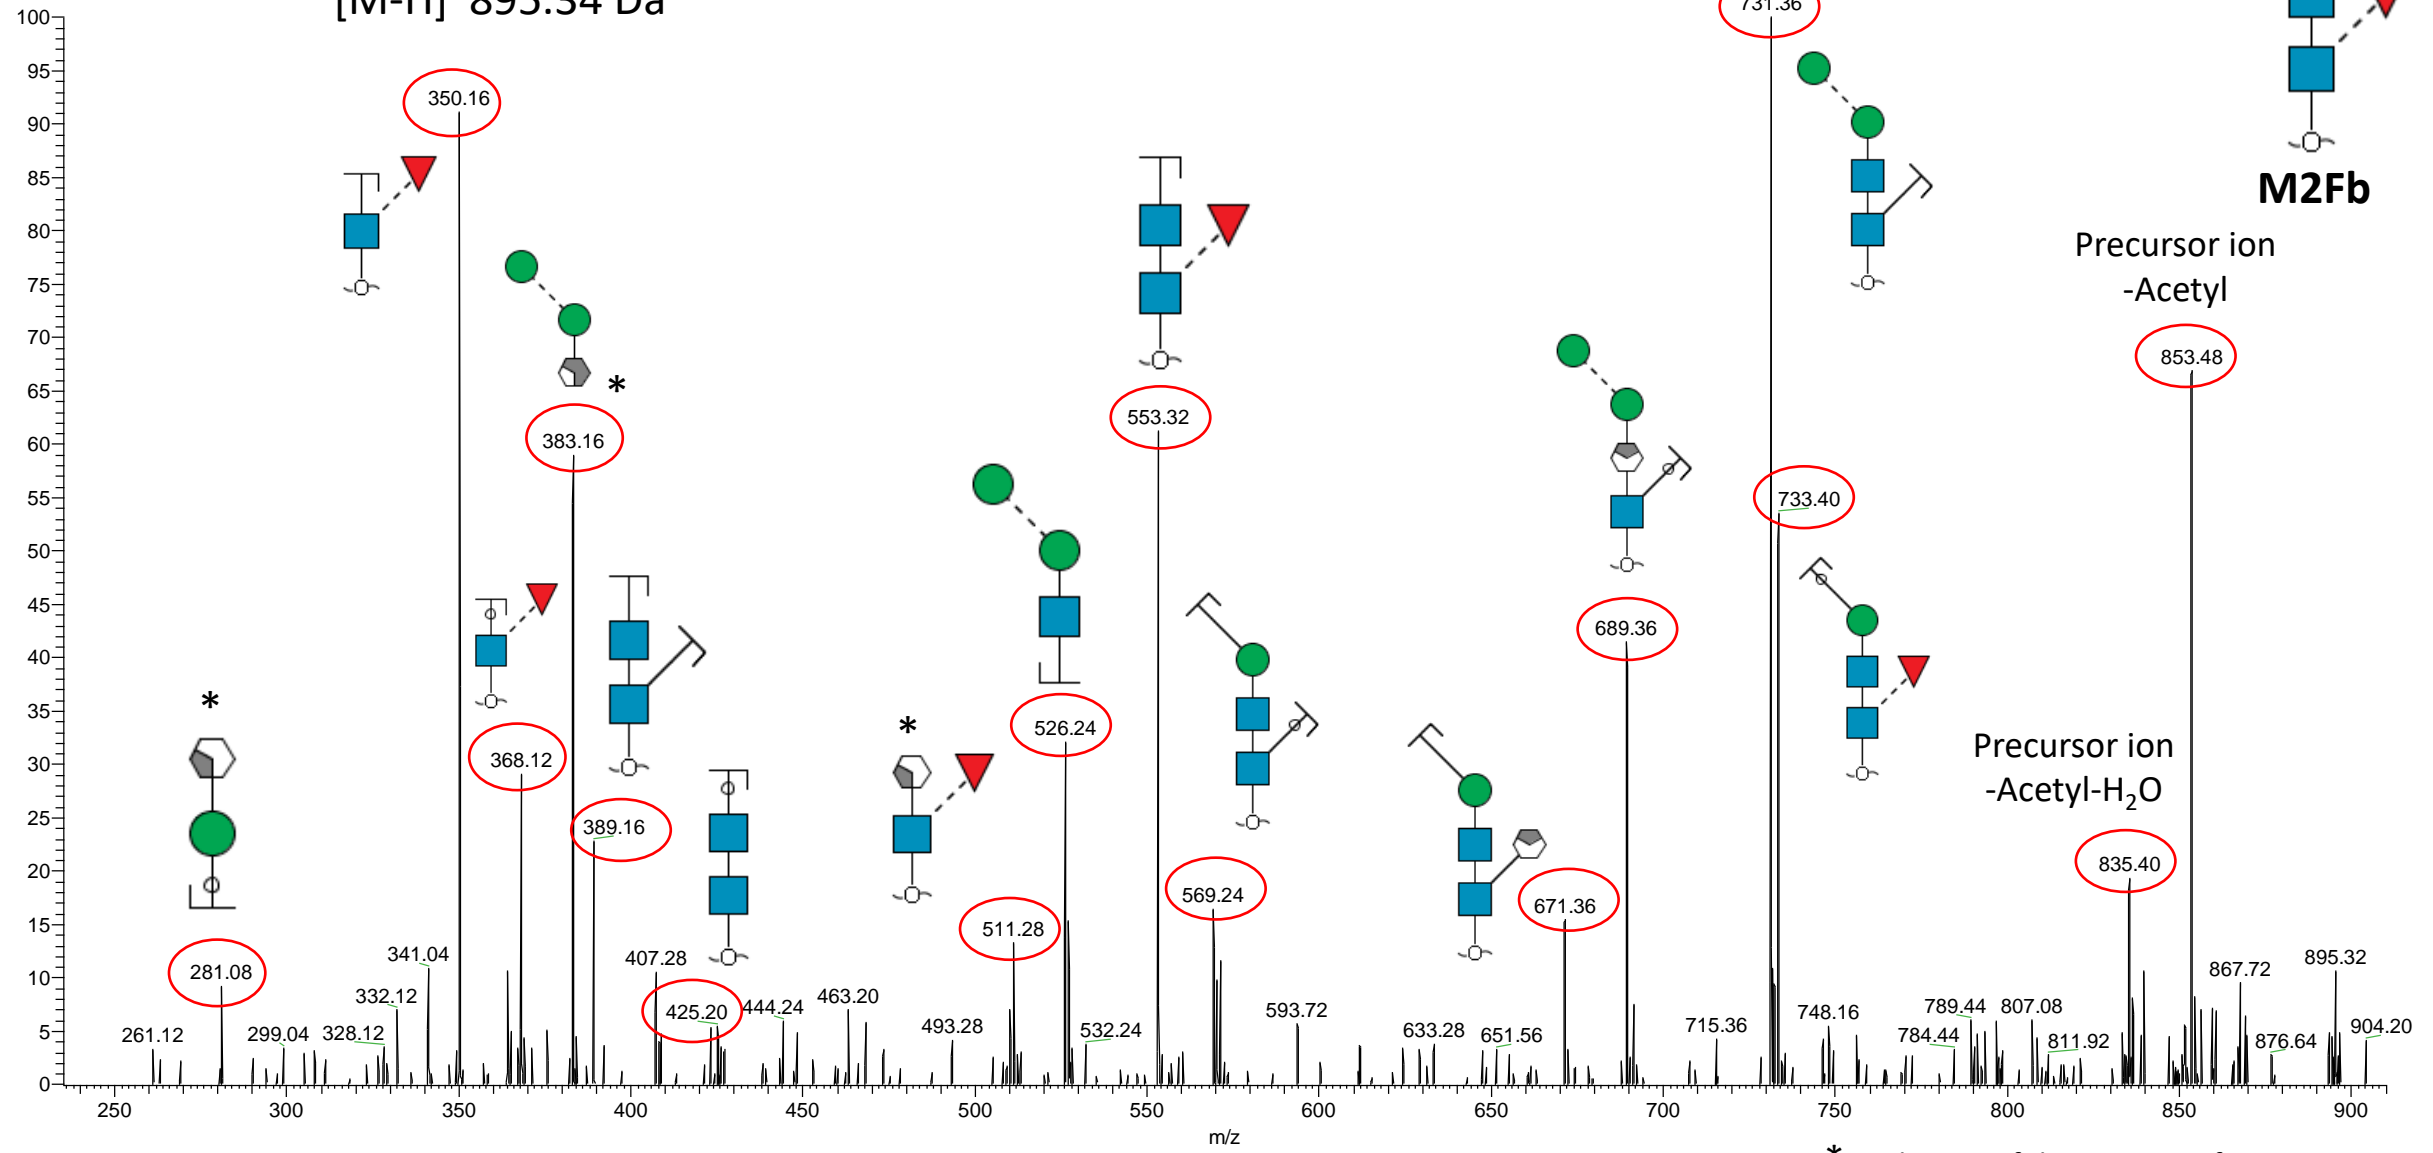

\* Ambiguity of the cross-ring fragments

# Glycan #6

Observed  $m/z$  911.44 (1-), RT: ~22.9 min  
 $[M-H]^-$  911.33 Da

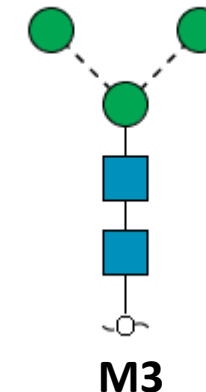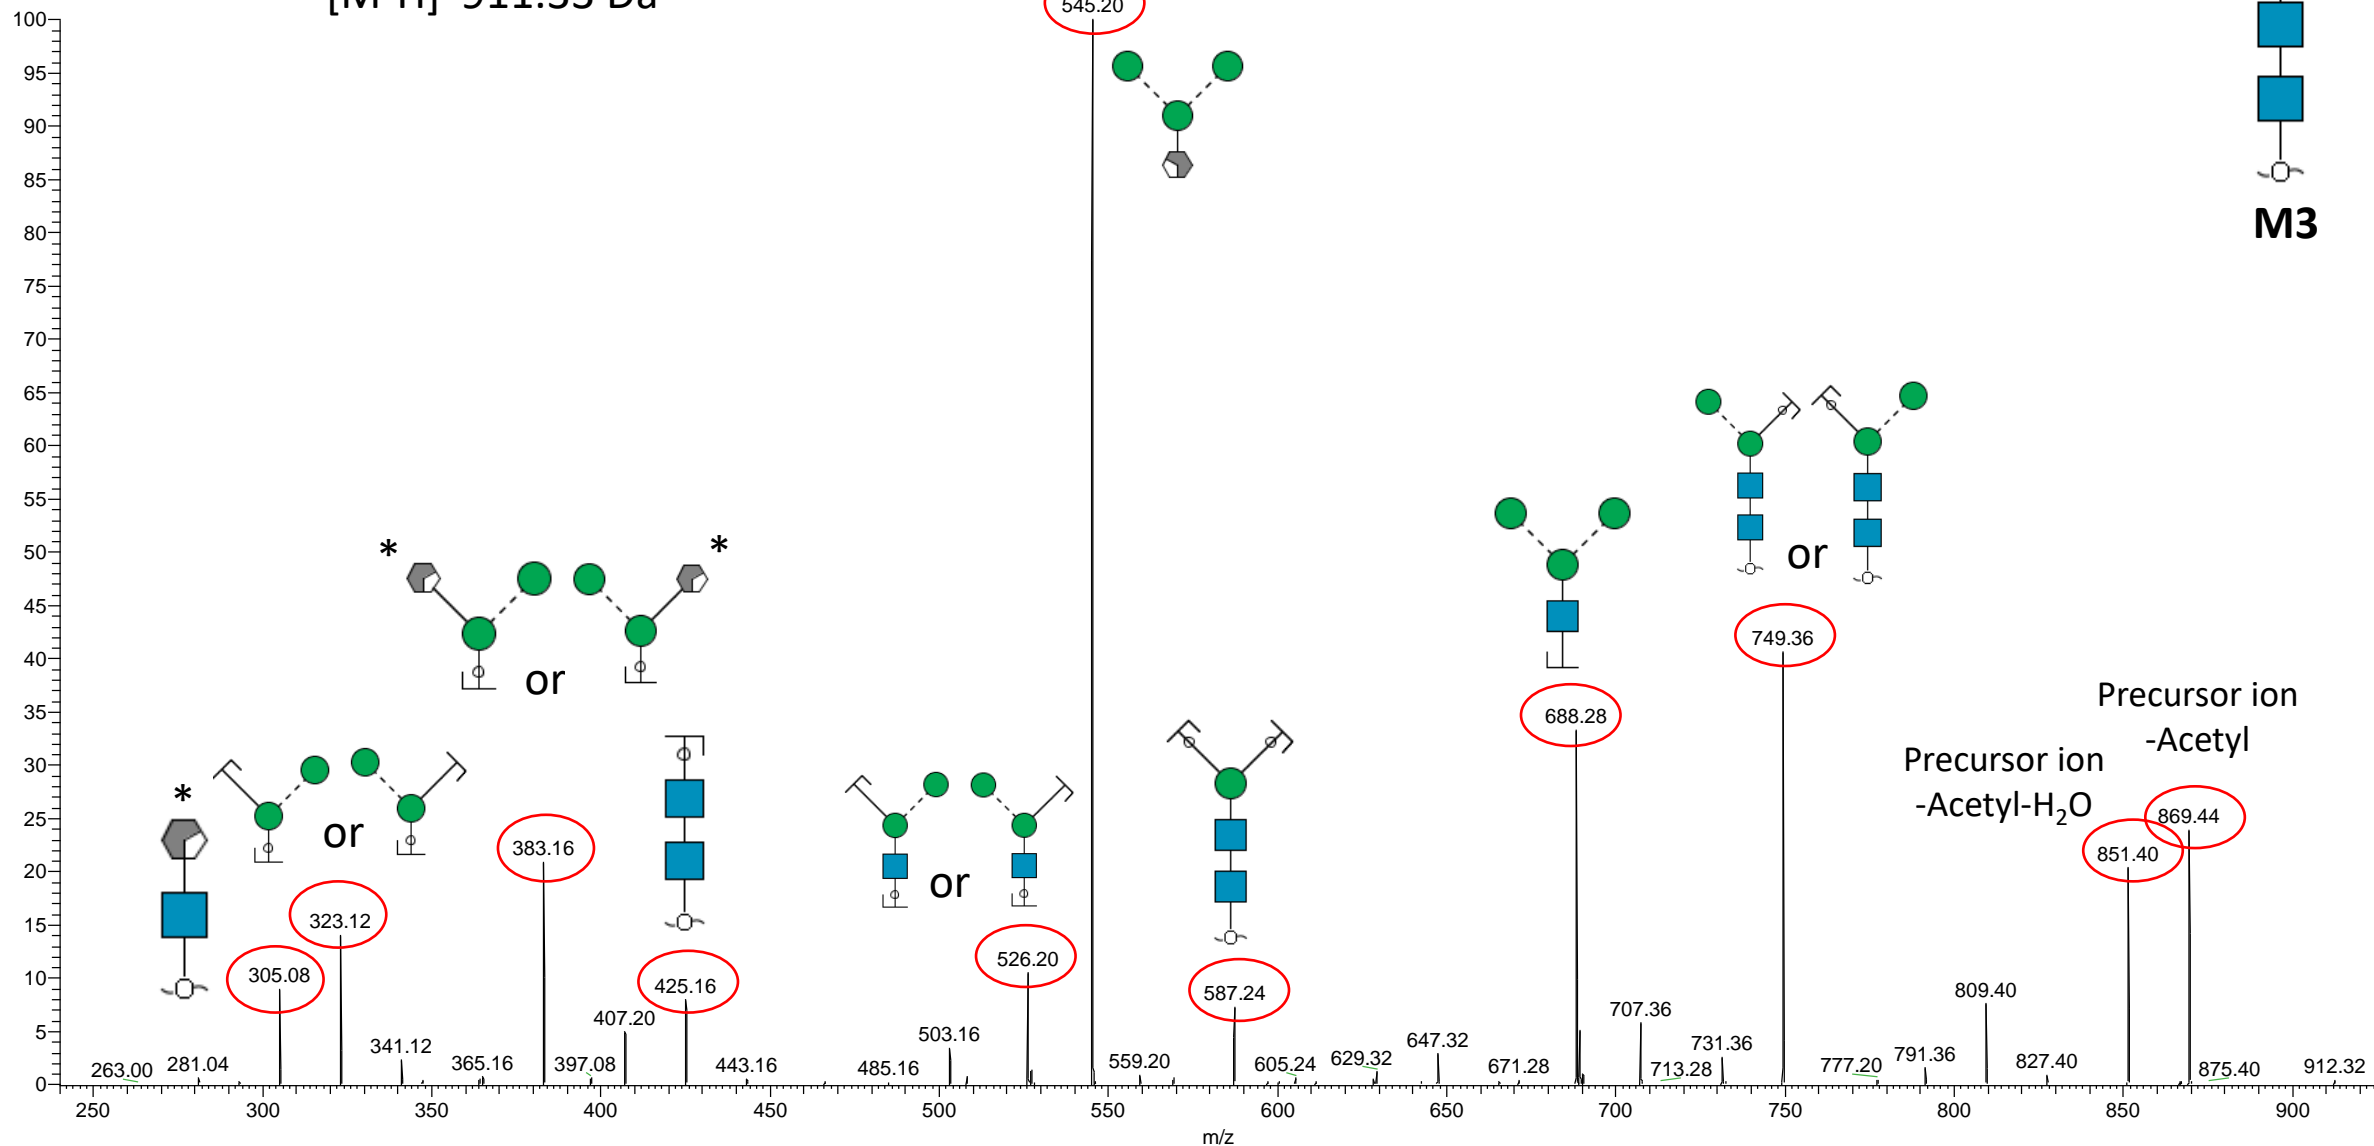

\* Ambiguity of the cross-ring fragments

# Glycan #7

Observed  $m/z$  1057.54 (1-), RT: ~31.1 min

$[M-H]^-$  1057.39 Da

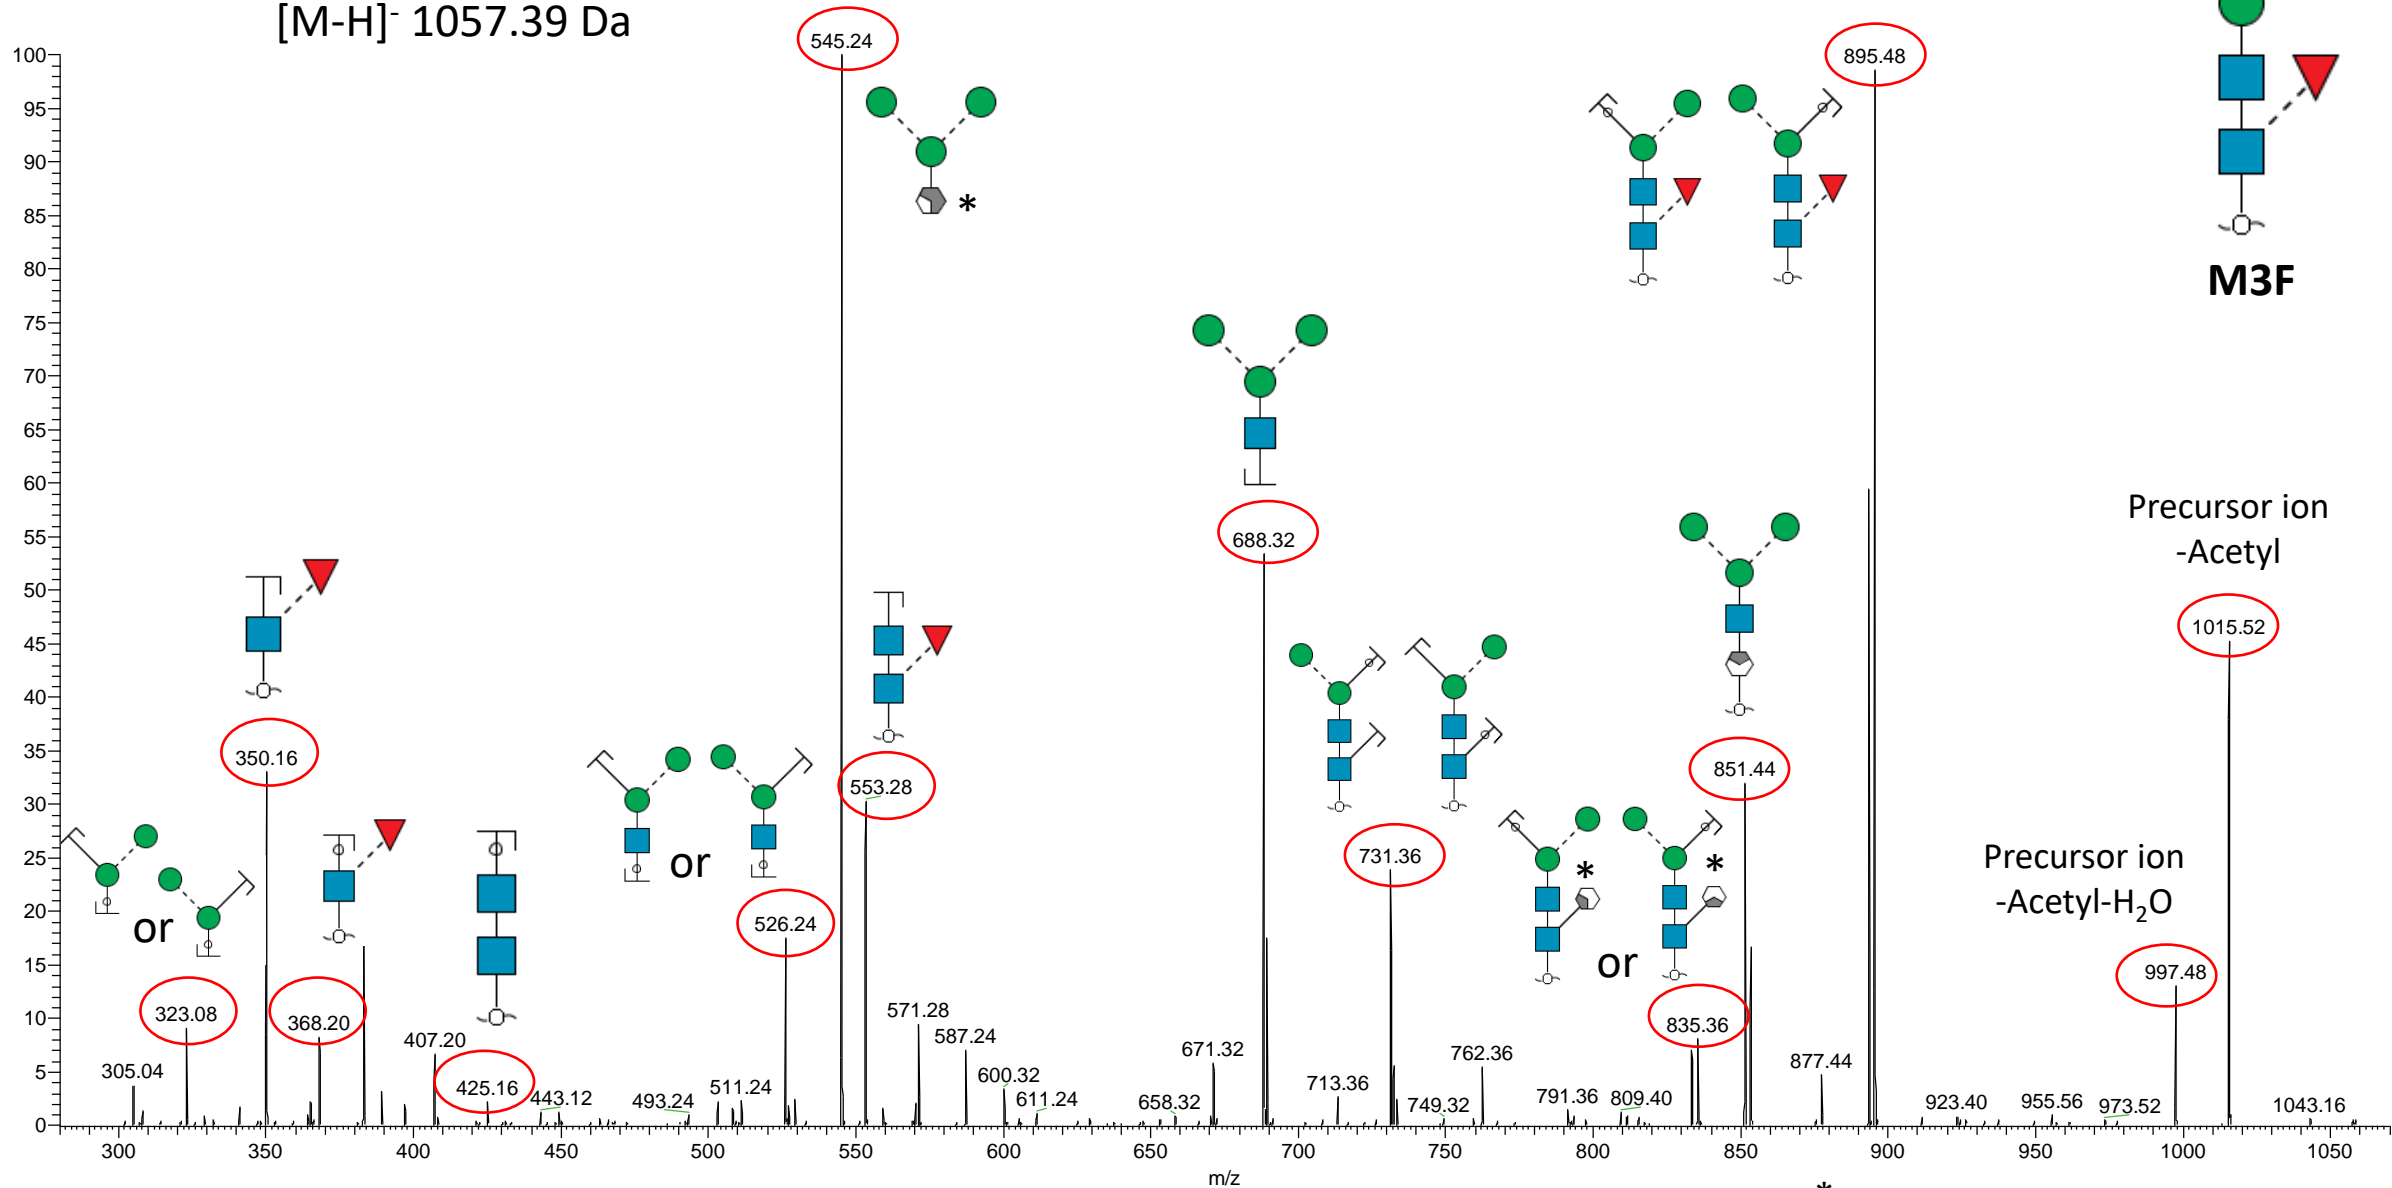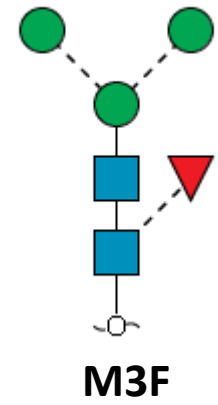

Precursor ion  
-Acetyl

1015.52

Precursor ion  
-Acetyl-H<sub>2</sub>O

997.48

\* Ambiguity of the cross-ring fragments

# Glycan #8a

Note: The outer mannose residue has been placed on the  $\alpha$ 1,6-Man arm based on biosynthetic rules and may be predicted to be  $\alpha$ 1,6-linked based on PGC LC elution pattern (relative to the M4b isomer). However the mannosyl linkage of this residue was left unassigned since no MS/MS evidence is present to support this.

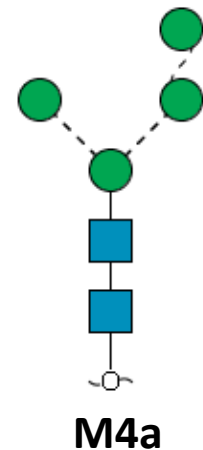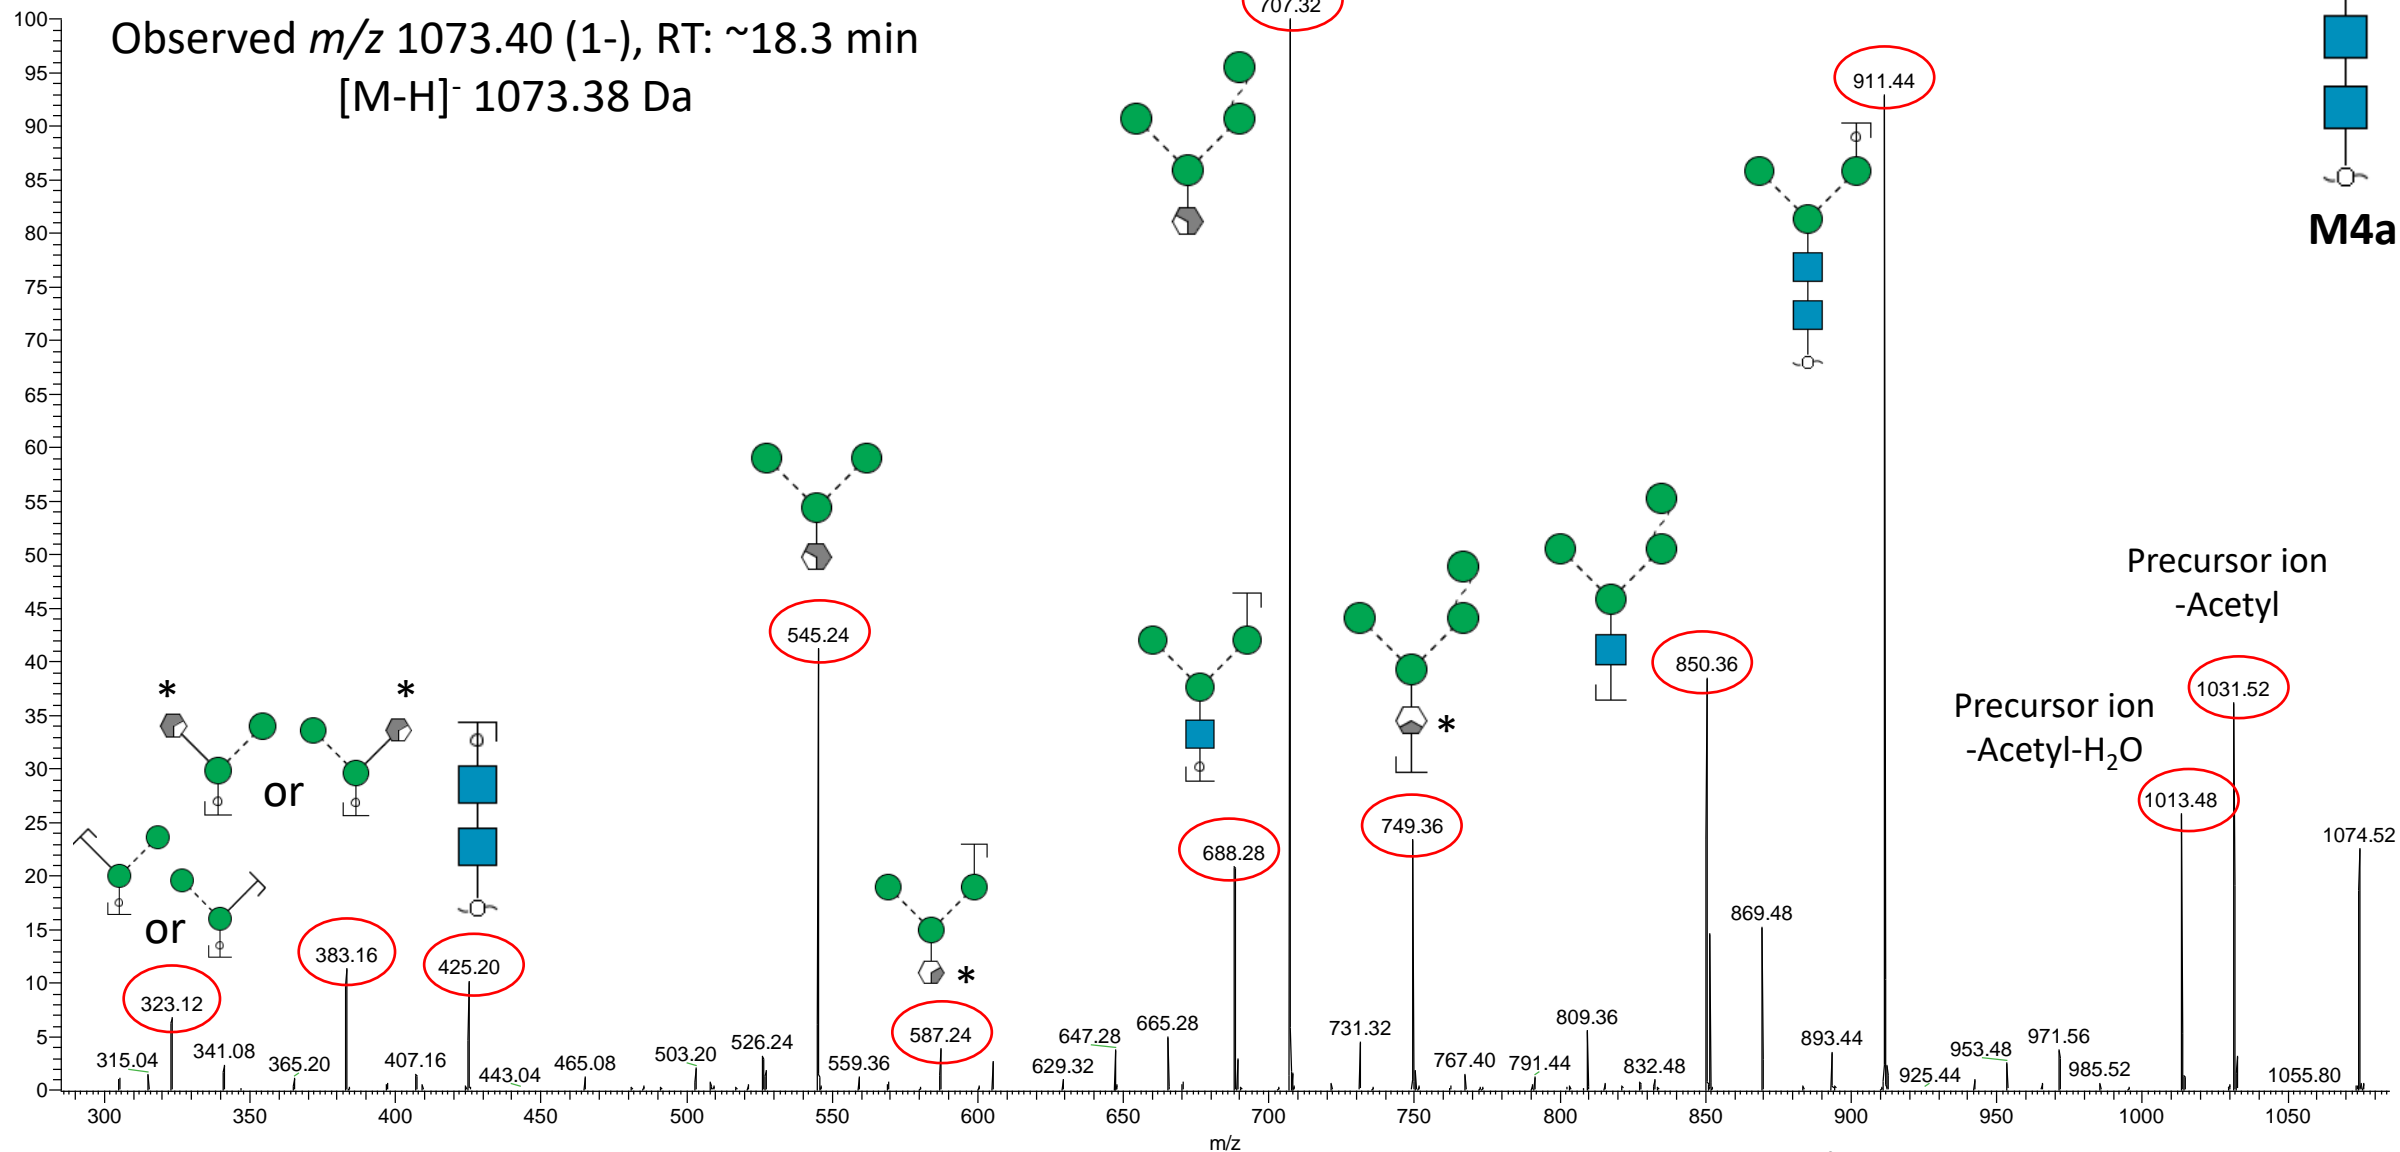

\* Ambiguity of the cross-ring fragments

# Glycan #8b

Note: The outer mannose residue has been placed on the  $\alpha$ 1,6-Man arm based on biosynthetic rules and may be predicted to be  $\alpha$ 1,3-linked based on PGC LC elution pattern (relative to the M4a isomer). However the mannosyl linkage of this residue was left unassigned since no MS/MS evidence is present to support this.

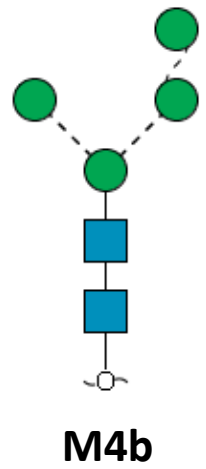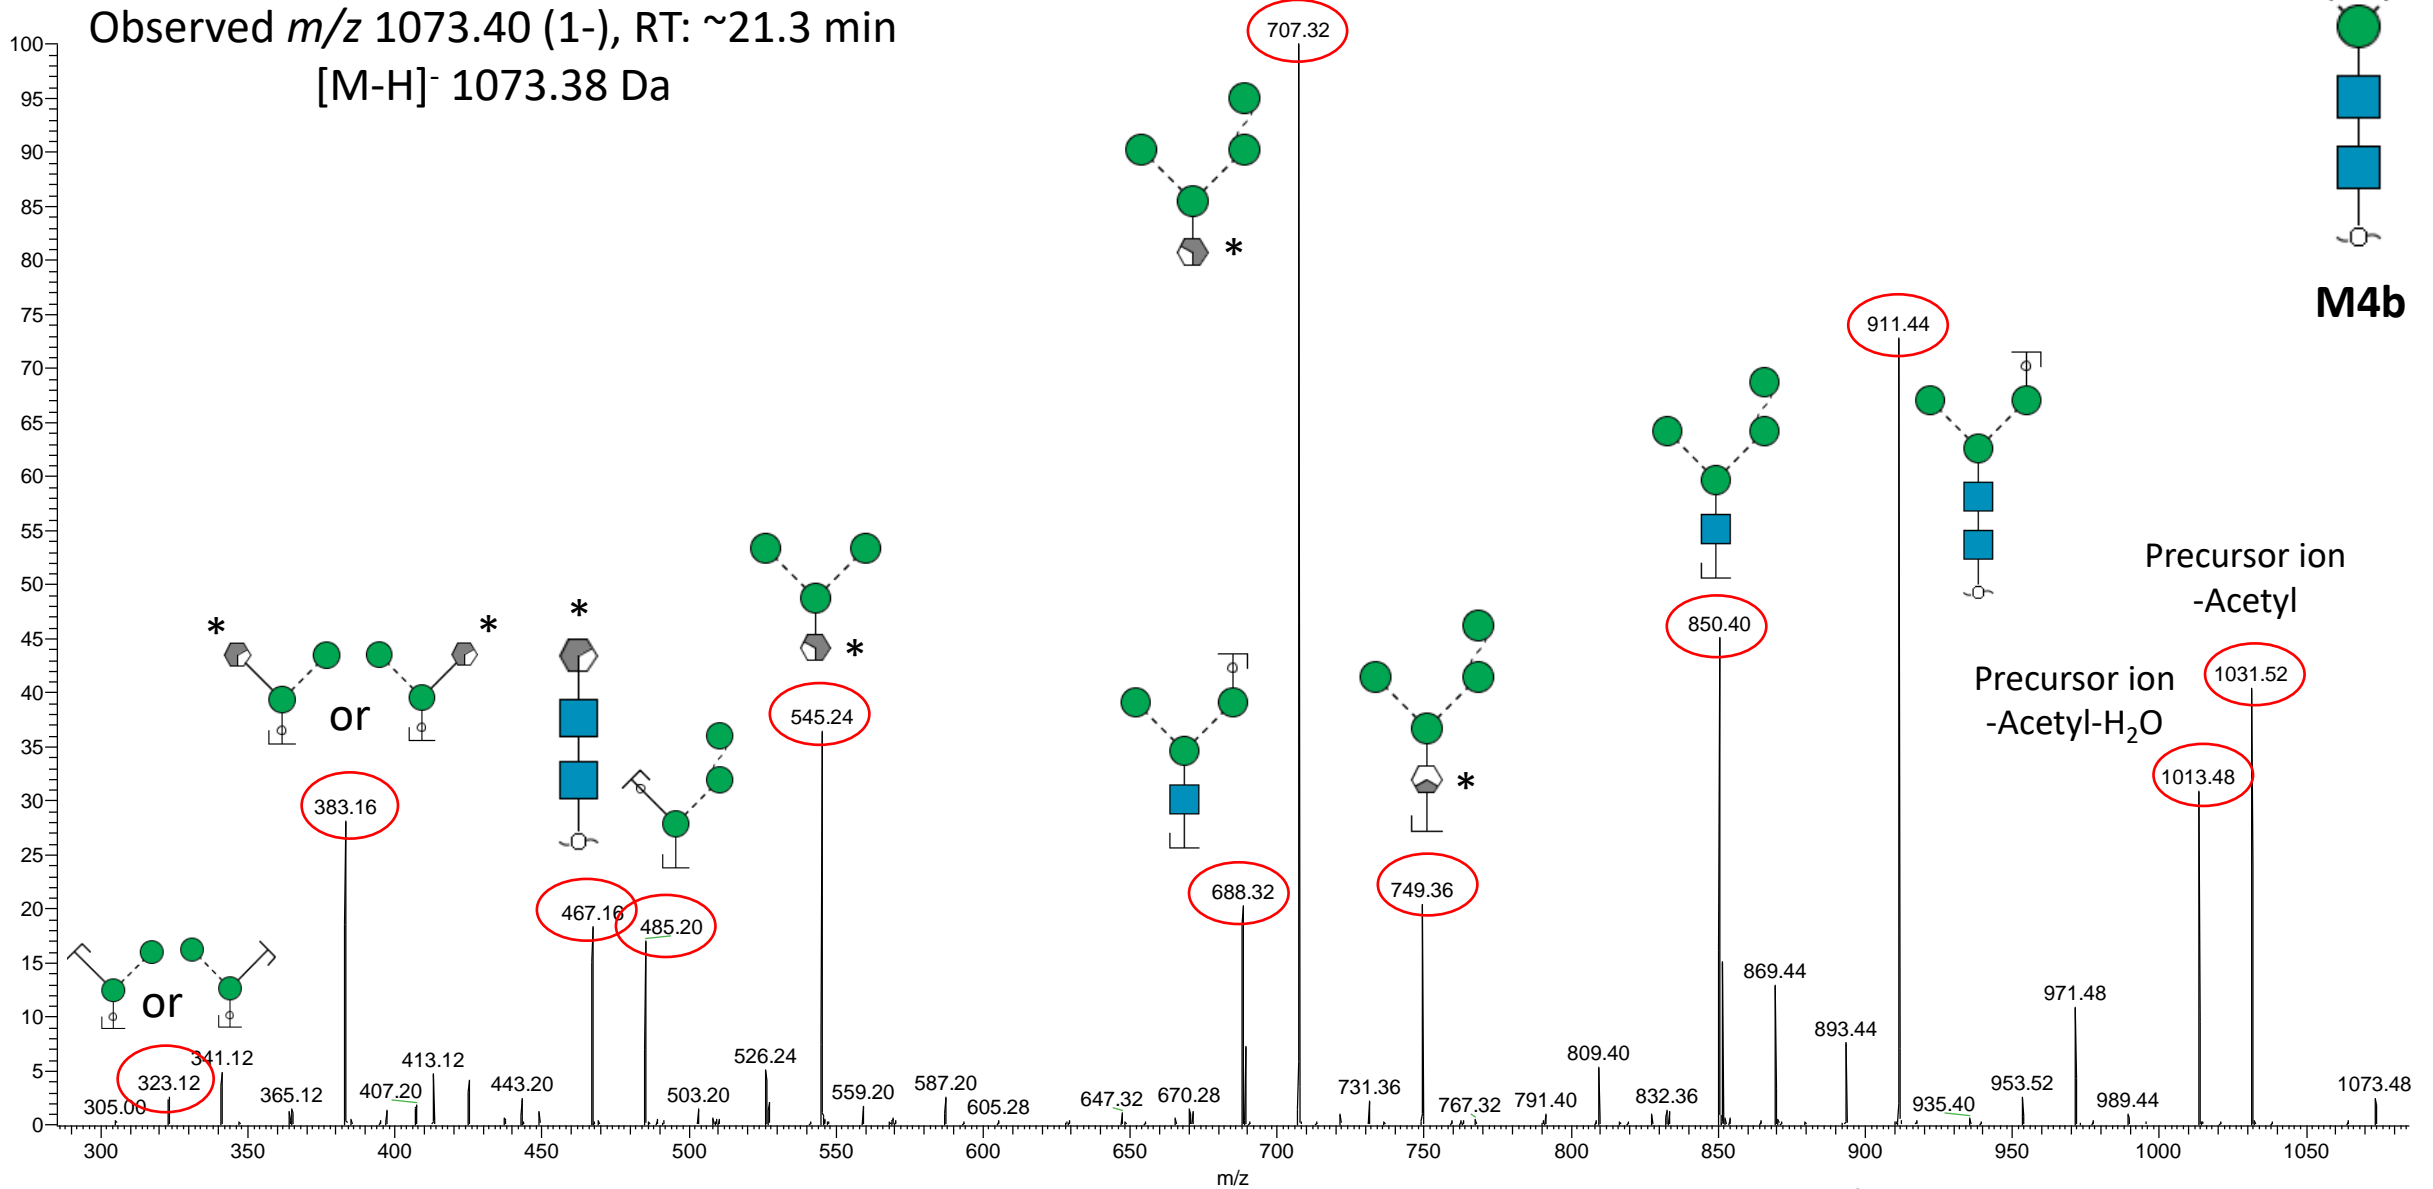

\* Ambiguity of the cross-ring fragments

# Glycan #9

Note: The outer mannose residue has been placed on the  $\alpha$ 1,6-Man arm based on biosynthetic rules. Unknown if this residue is found in a  $\alpha$ 1,3- or  $\alpha$ 1,6-linkage since no MS/MS evidence to support either so left unassigned.

Observed  $m/z$  1219.44 (1-), RT: ~28.5 min  
[M-H]<sup>-</sup> 1219.44 Da

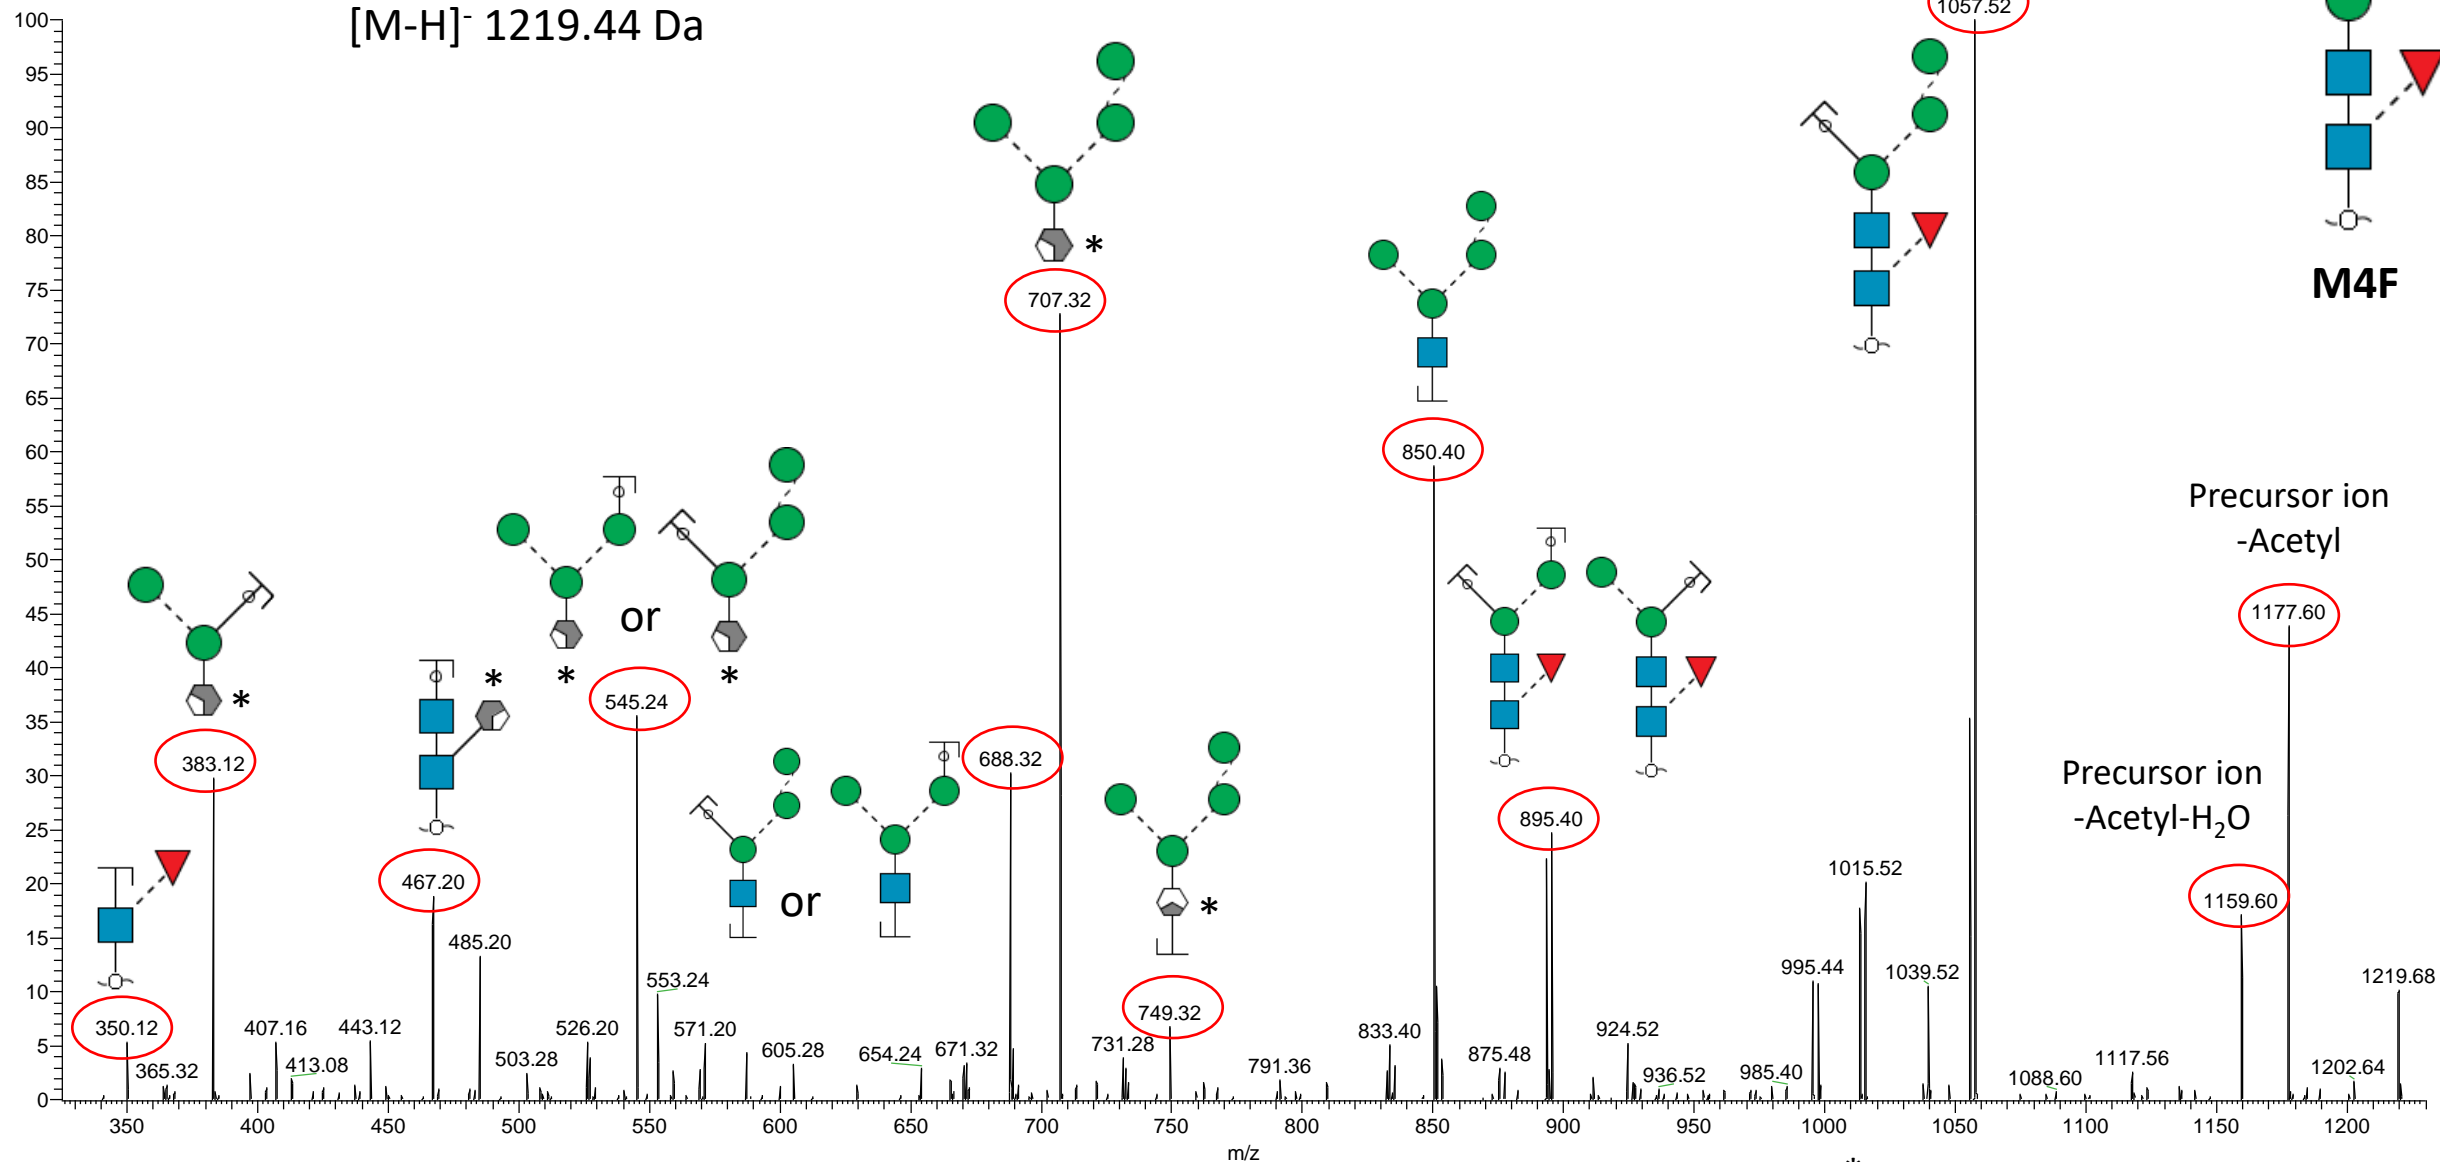

\* Ambiguity of the cross-ring fragments

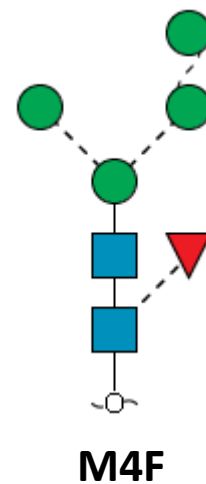

# Glycan #10

Observed  $m/z$  617.22 (2-), RT: ~18.1 min

$[M-H]^-$  1235.44 Da

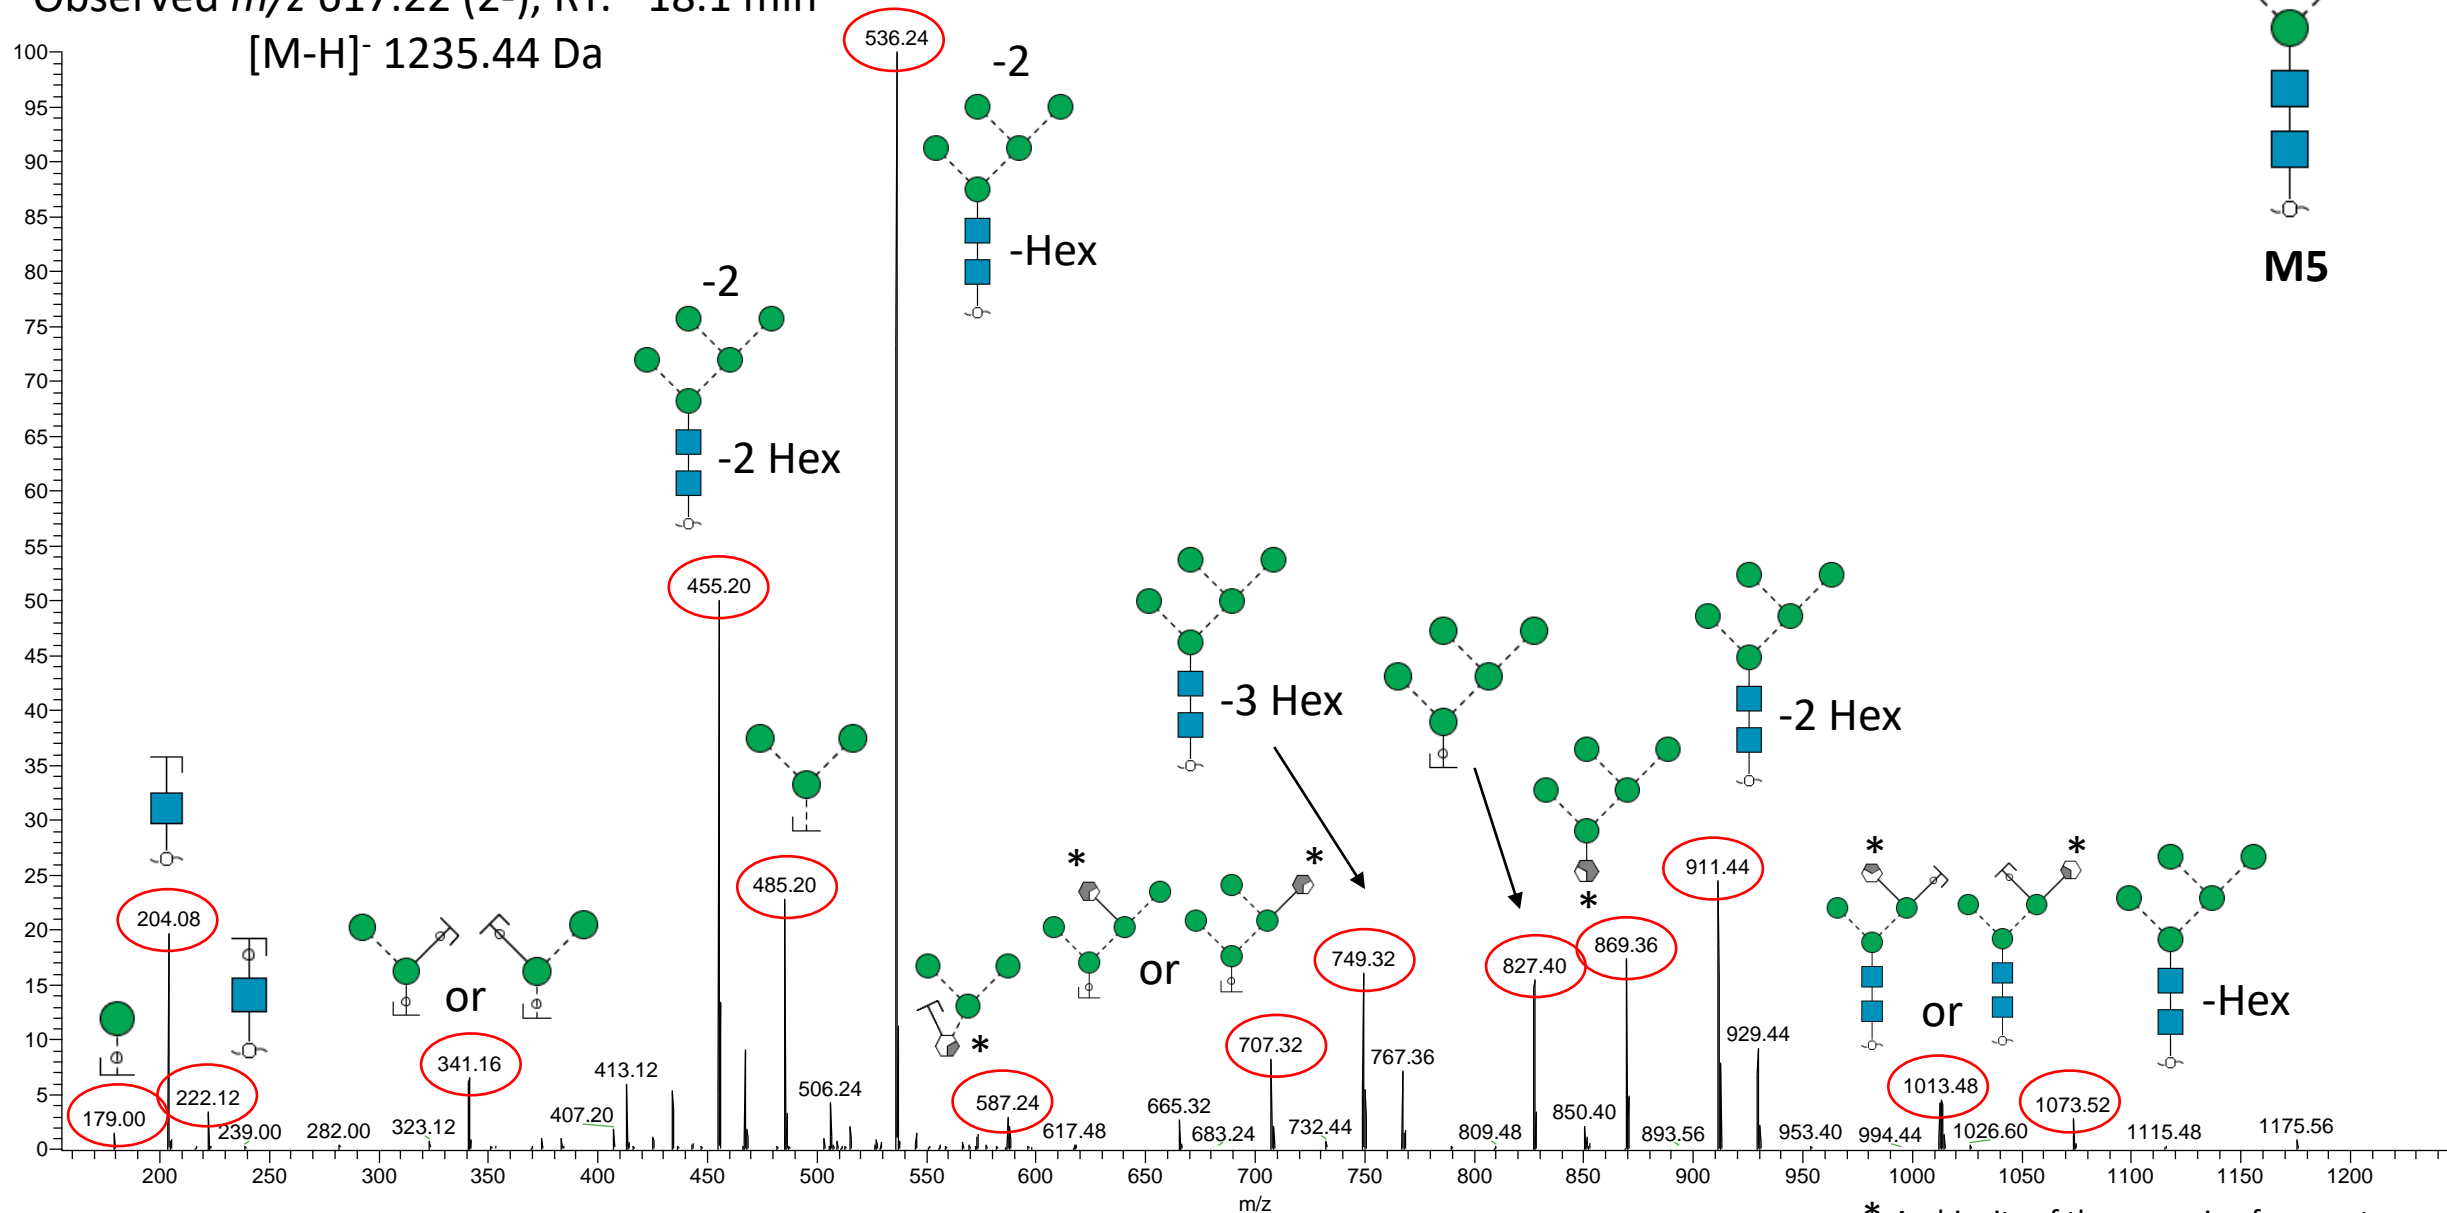

\* Ambiguity of the cross-ring fragments

# Glycan #11a

Note: Structure predicted from known biosynthetic rules, but no MS/MS support for exact topology of outer mannose residues.

Observed  $m/z$  1381.62 (1-), RT: ~30.4 min  
[M-H]<sup>-</sup> 1381.49 Da

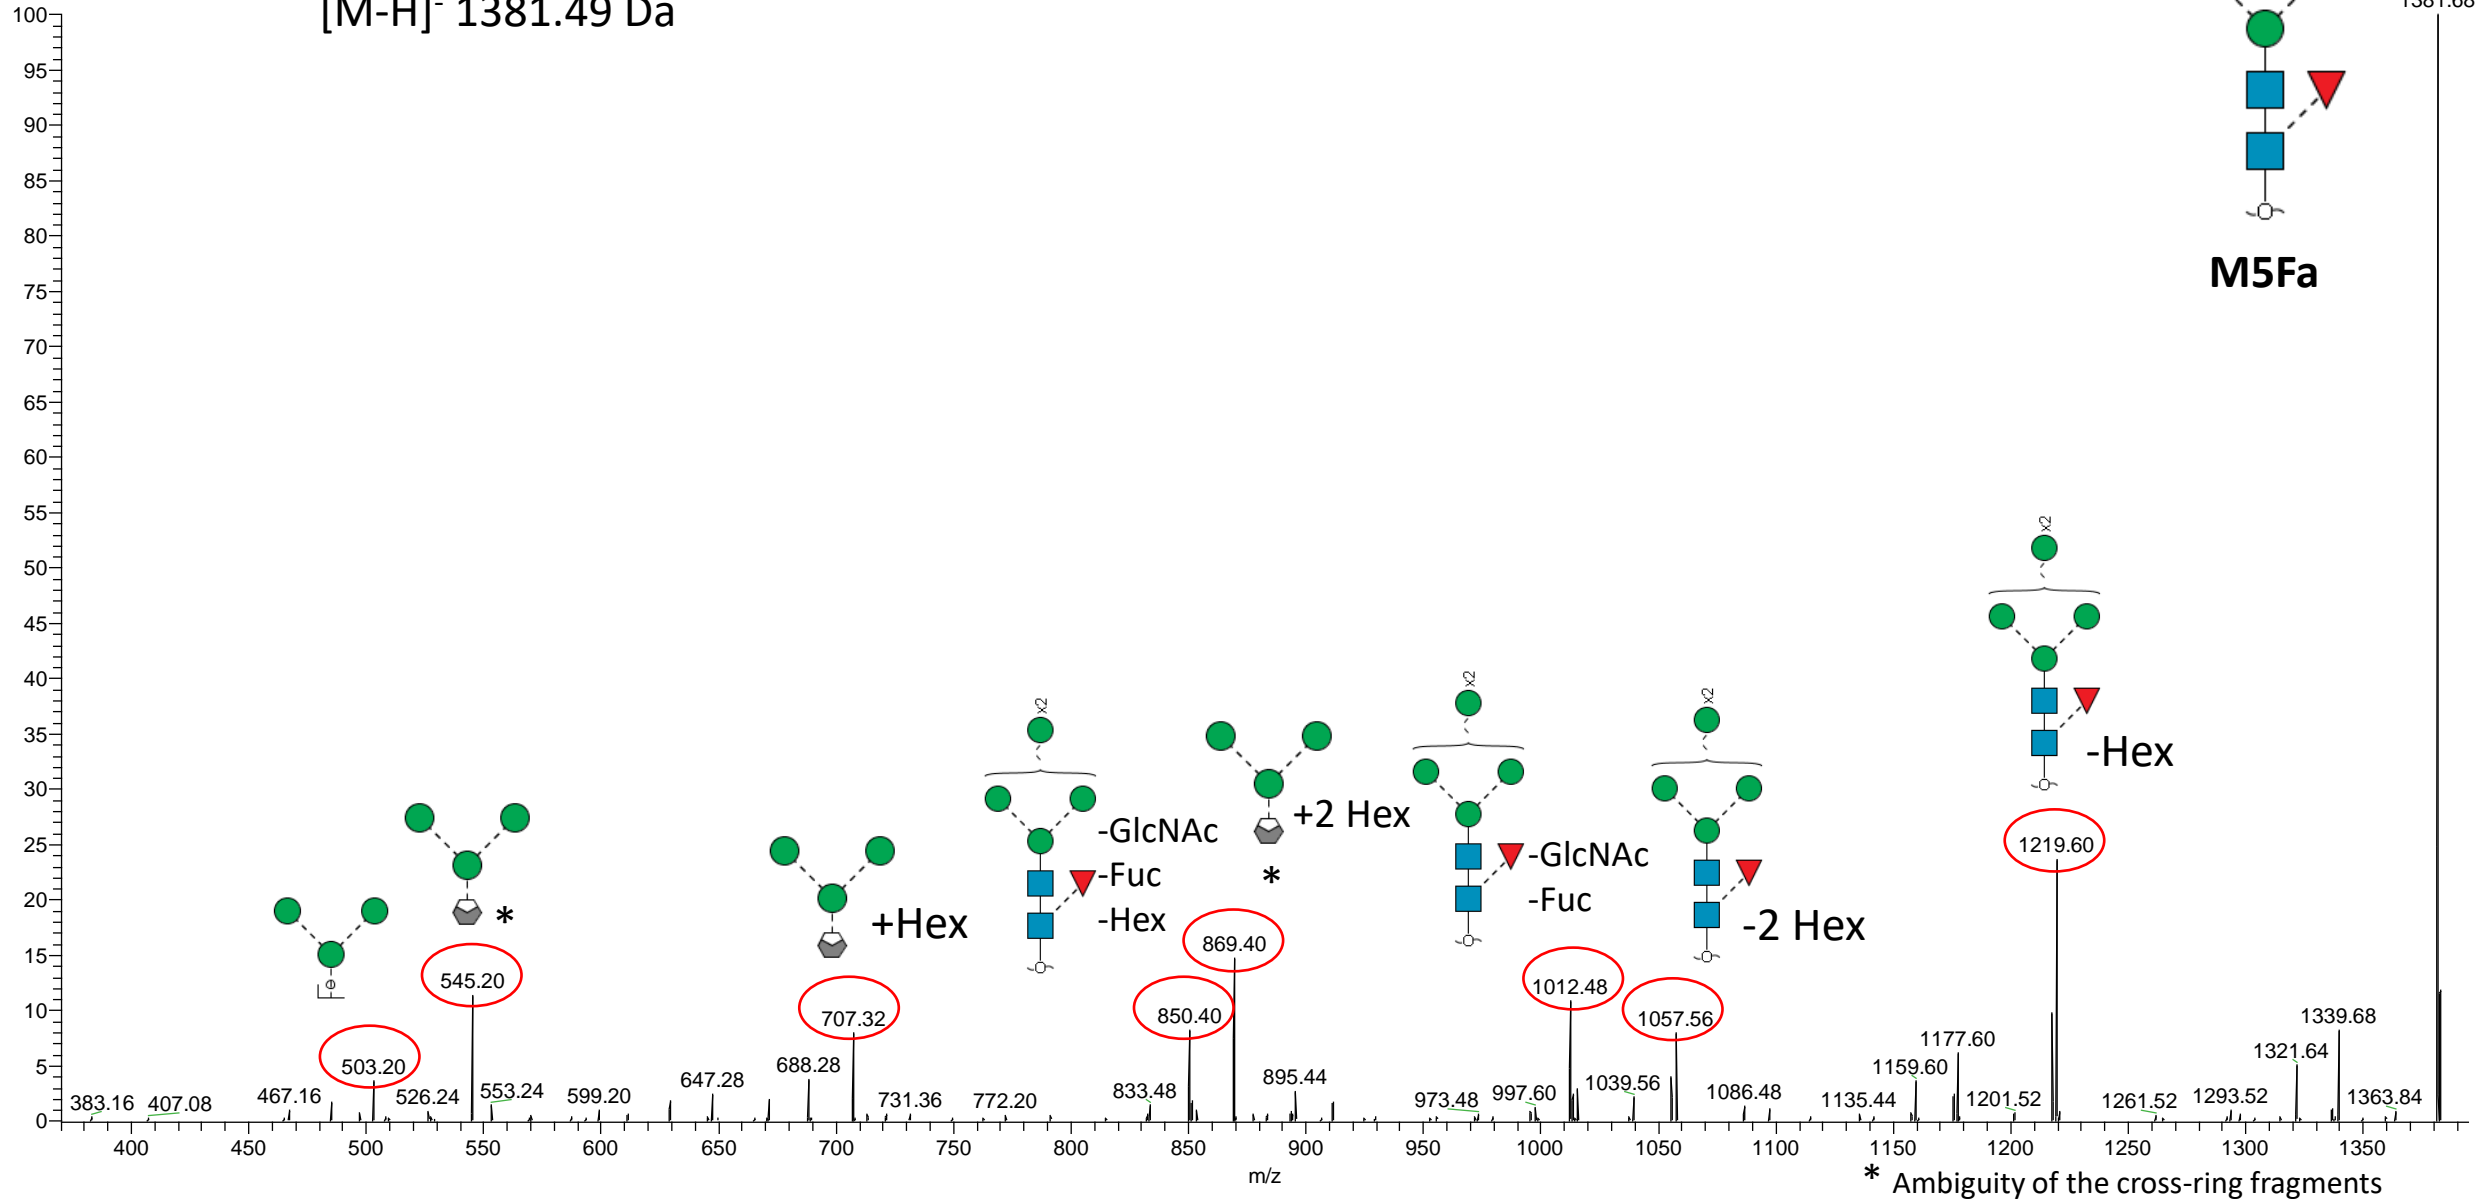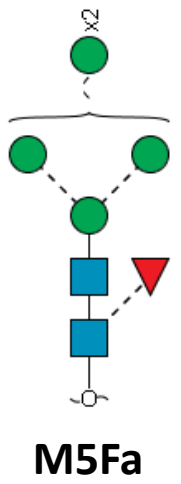



# Glycan #11b

Note: Structure predicted from known biosynthetic rules, but no MS/MS support for exact topology of outer mannose residues.

Observed  $m/z$  1381.62 (1-), RT: ~33.2 min  
[M-H]<sup>-</sup> 1381.49 Da

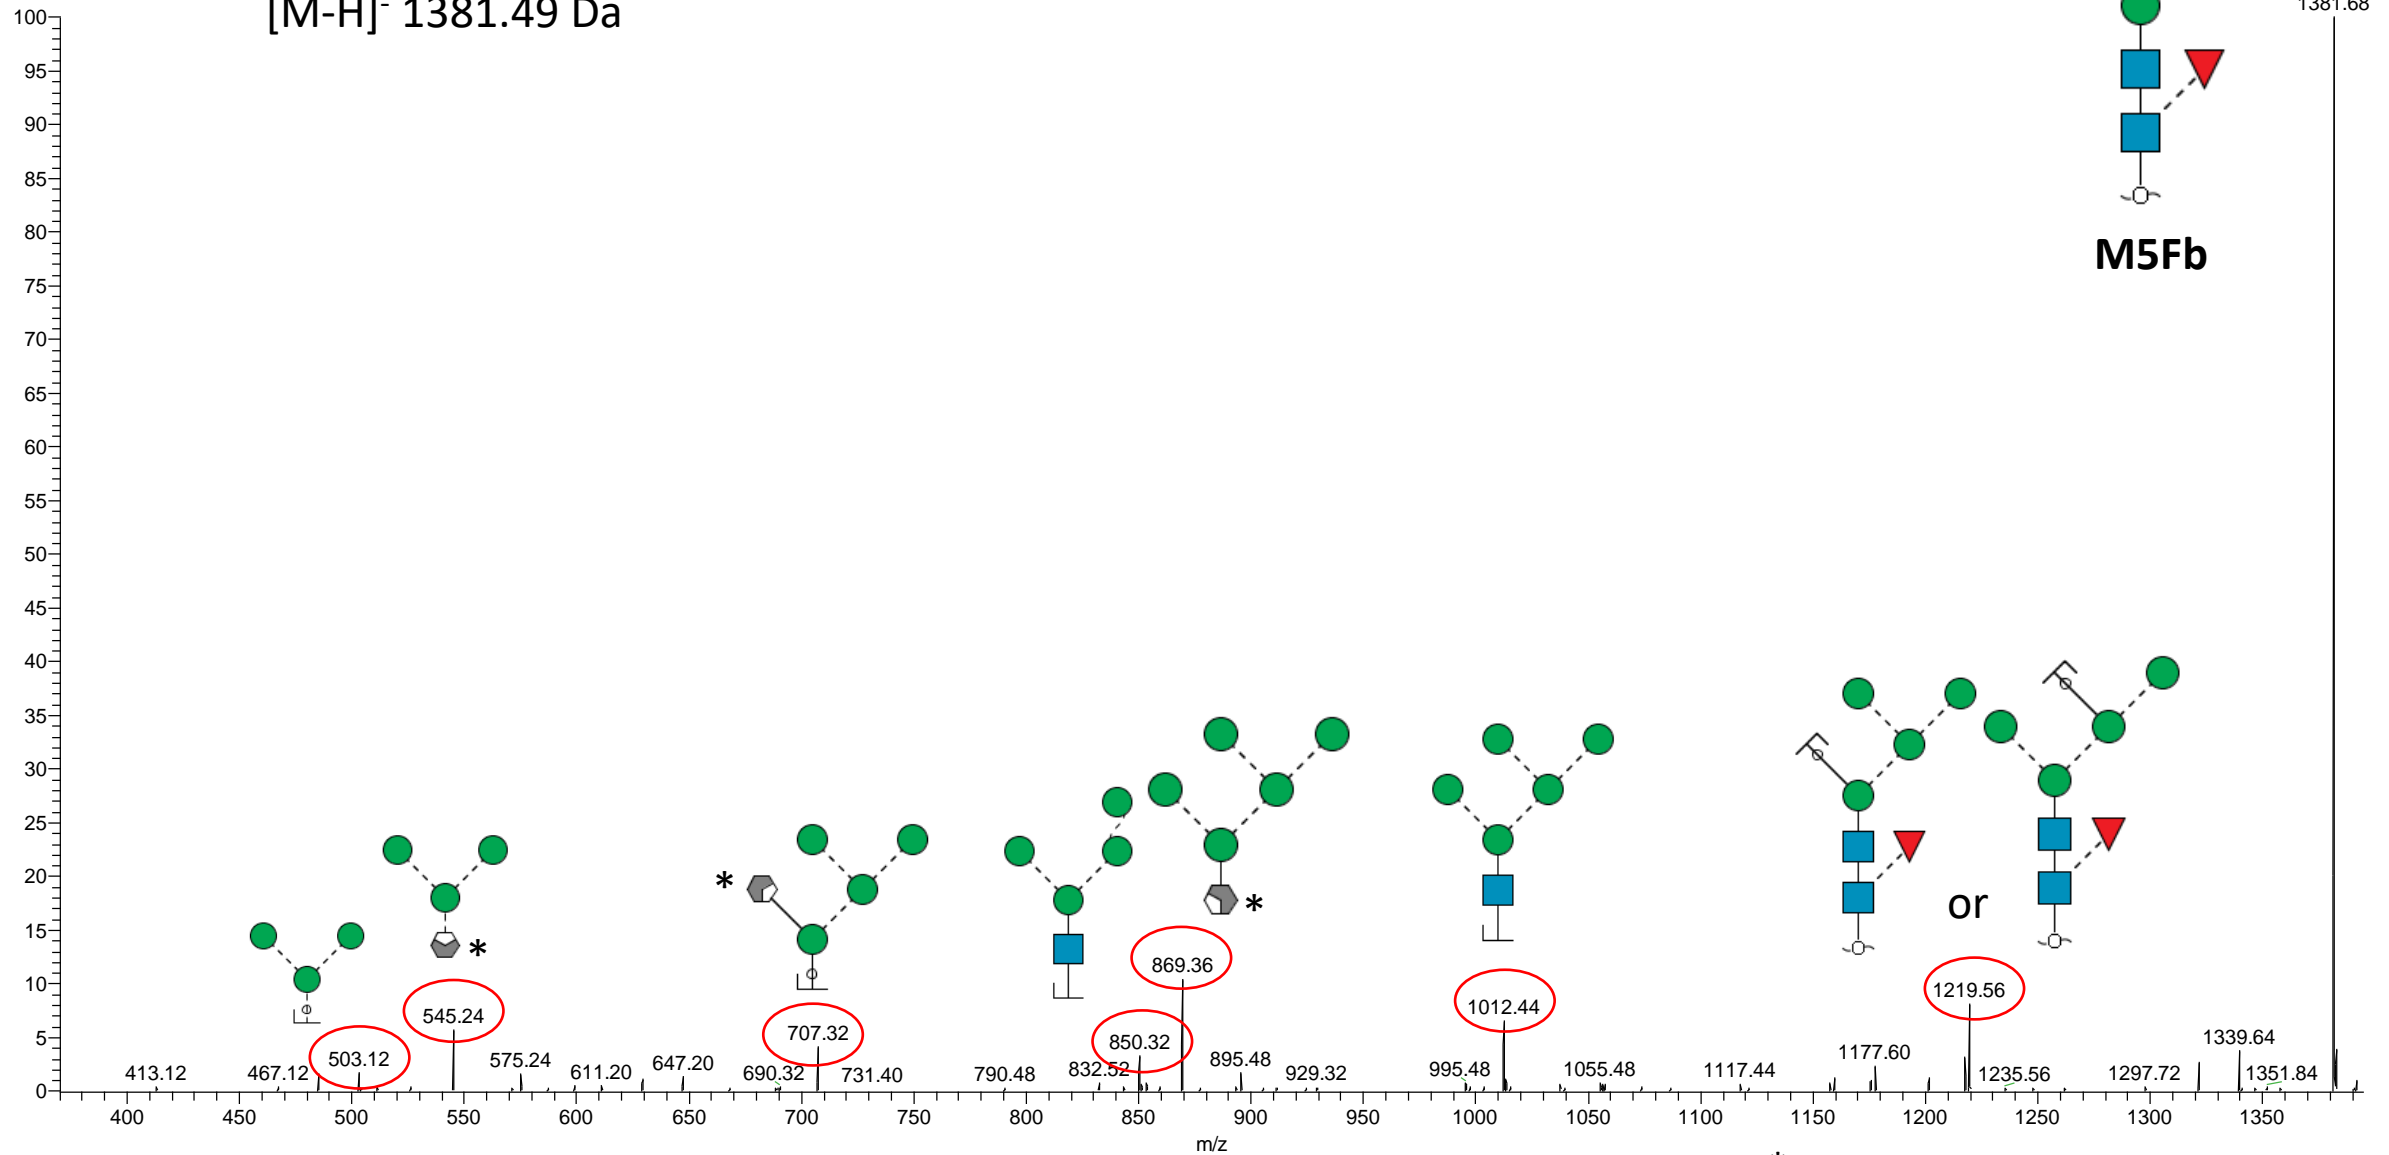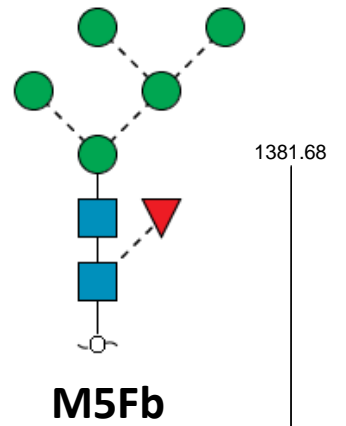

\* Ambiguity of the cross-ring fragments

# Glycan #12

Observed  $m/z$  698.36 (2-), RT: ~20.7 min  
[M-H]<sup>-</sup> 1397.49 Da

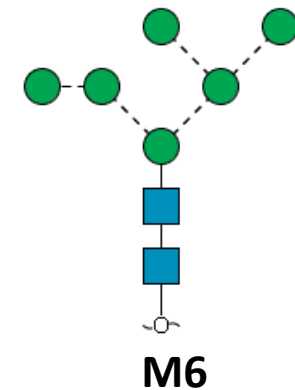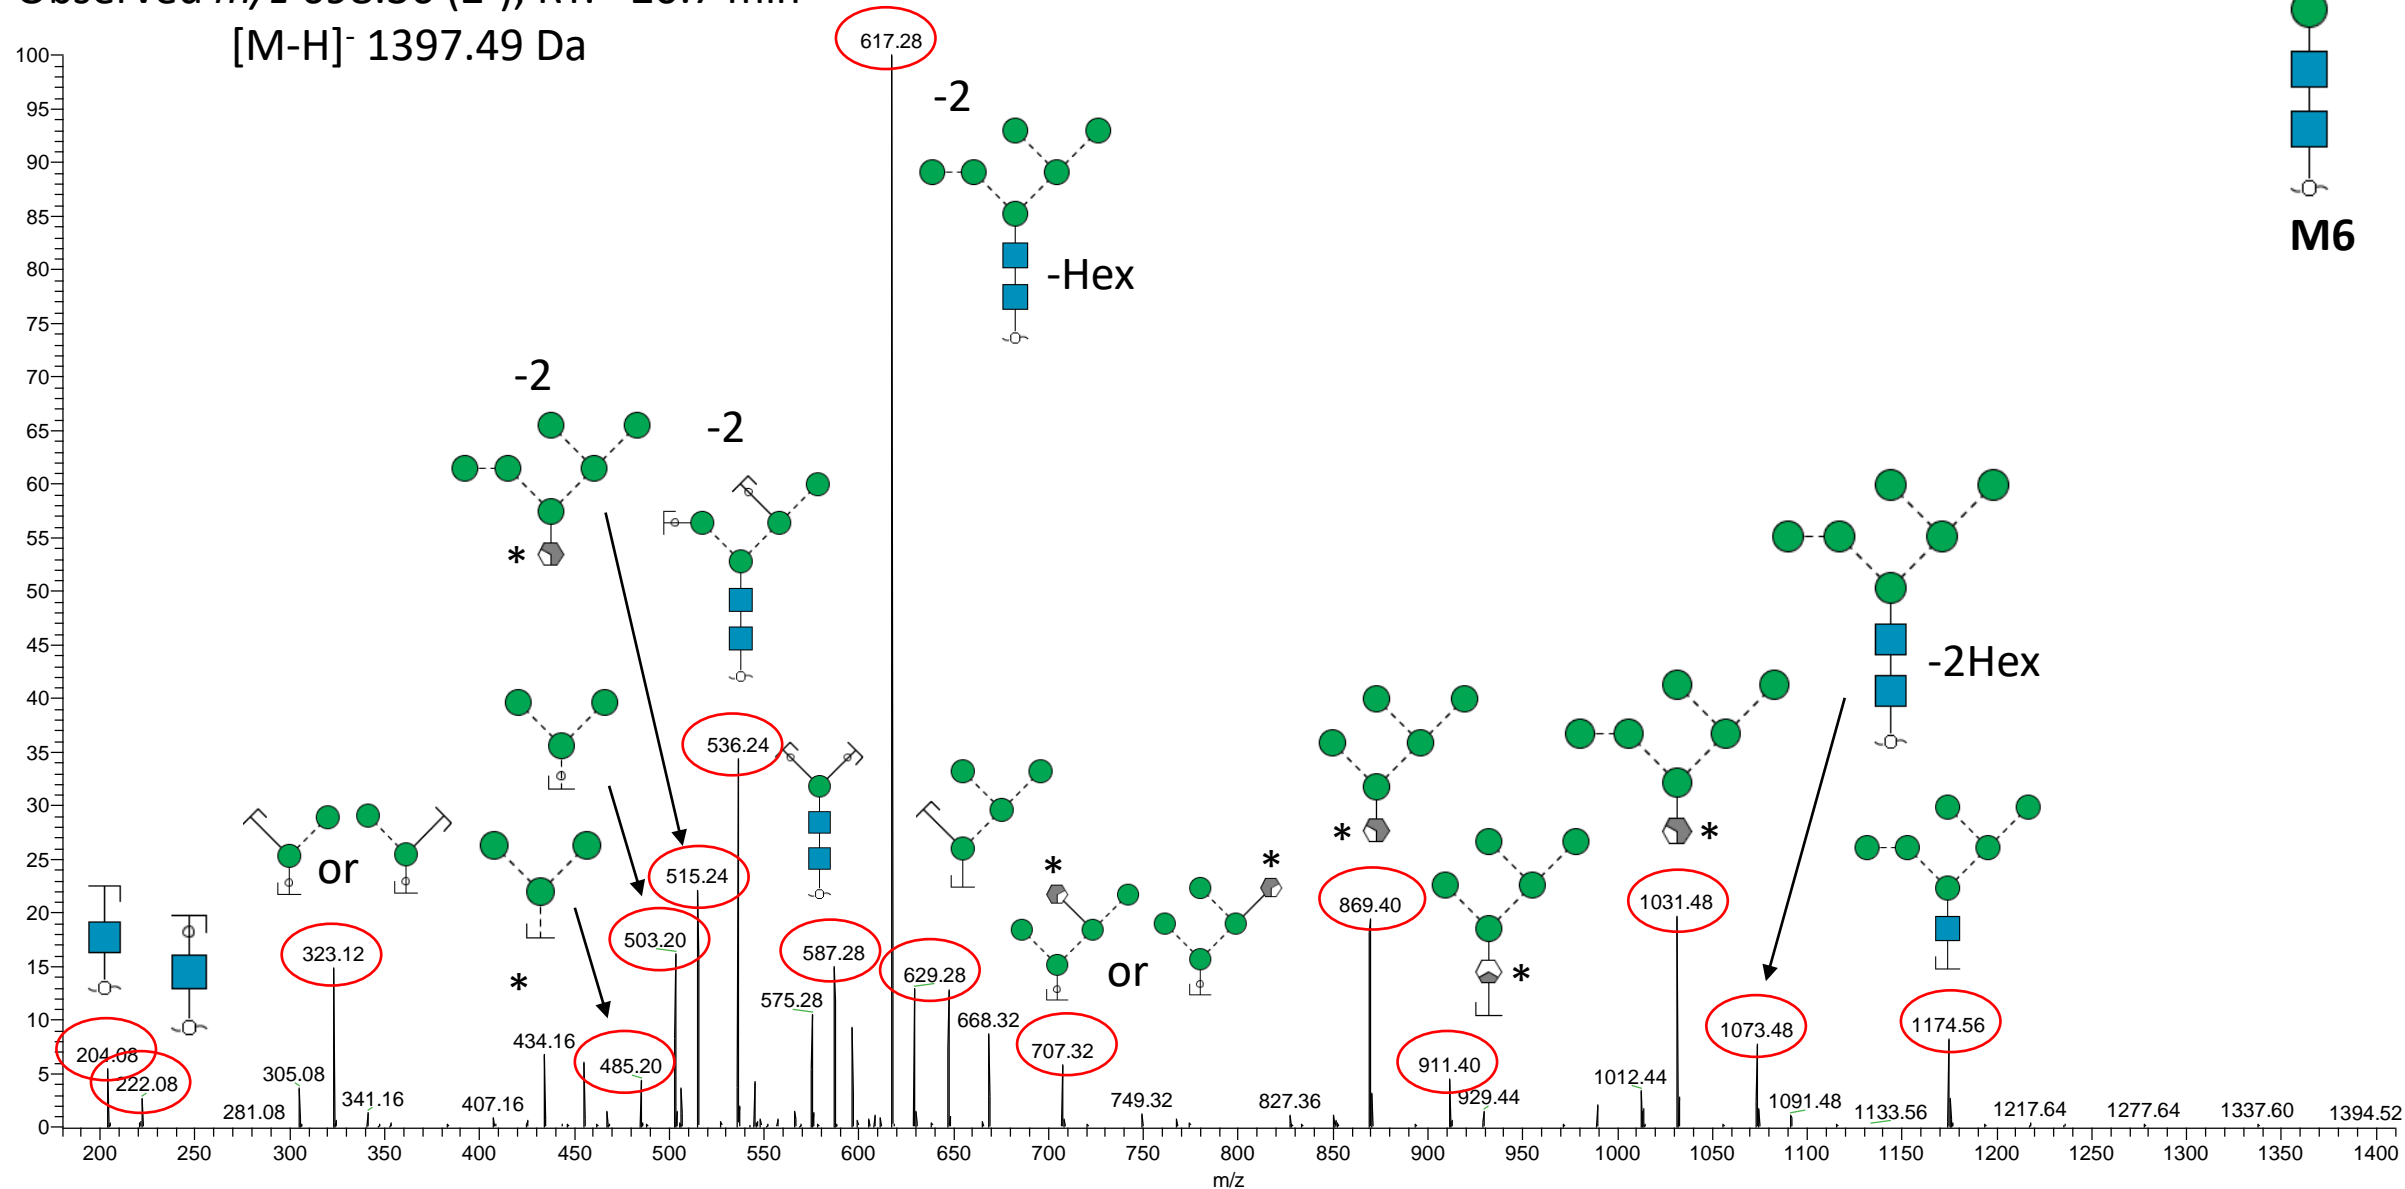

\* Ambiguity of the cross-ring fragments

# Glycan #13

Observed  $m/z$  779.38 (2-), RT: ~20.9 min  
 [M-H]<sup>-</sup> 1559.54 Da

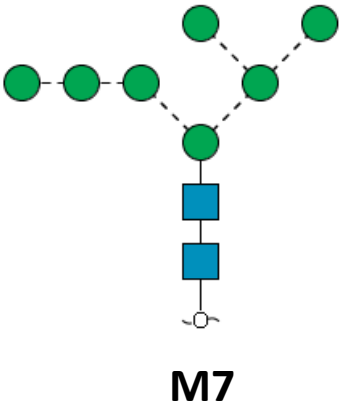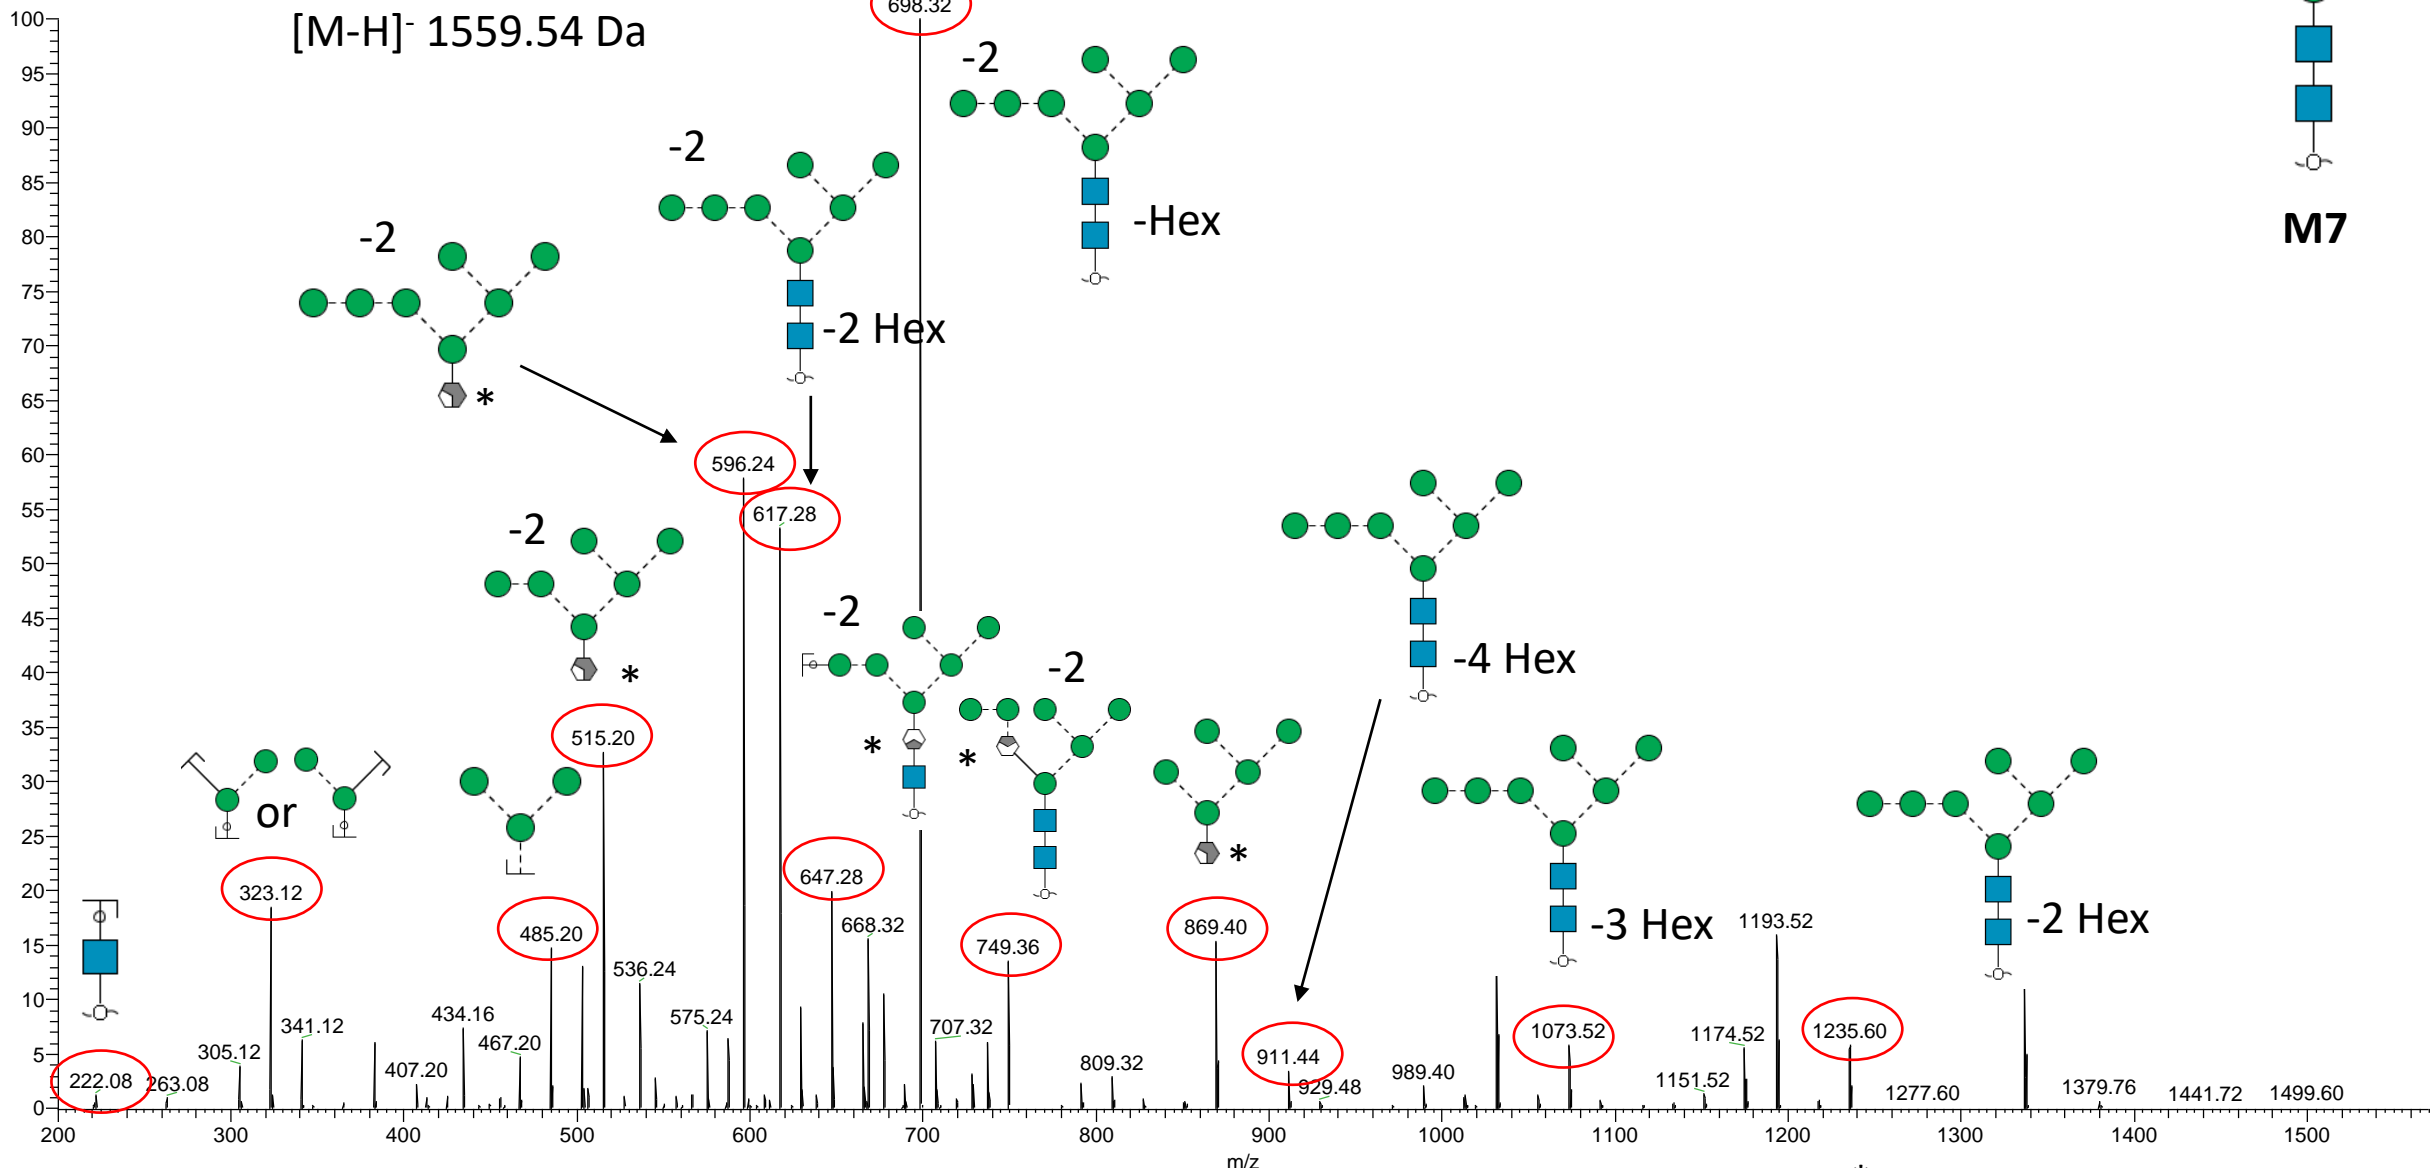

\* Ambiguity of the cross-ring fragments

# Glycan #14a

Observed  $m/z$  738.23 (2-), RT: ~17.6 min

[M-H]<sup>-</sup> 1477.46 Da

Note: Based on knowledge of the M6P pathway, the phosphate moiety appears on outer mannose residue, but no direct MS/MS evidence to support the exact position of the phosphate.

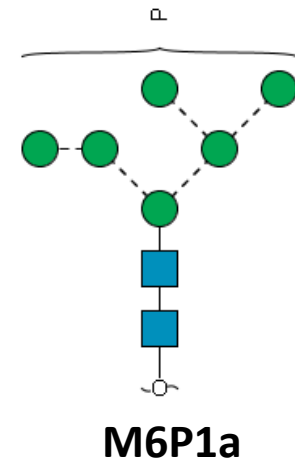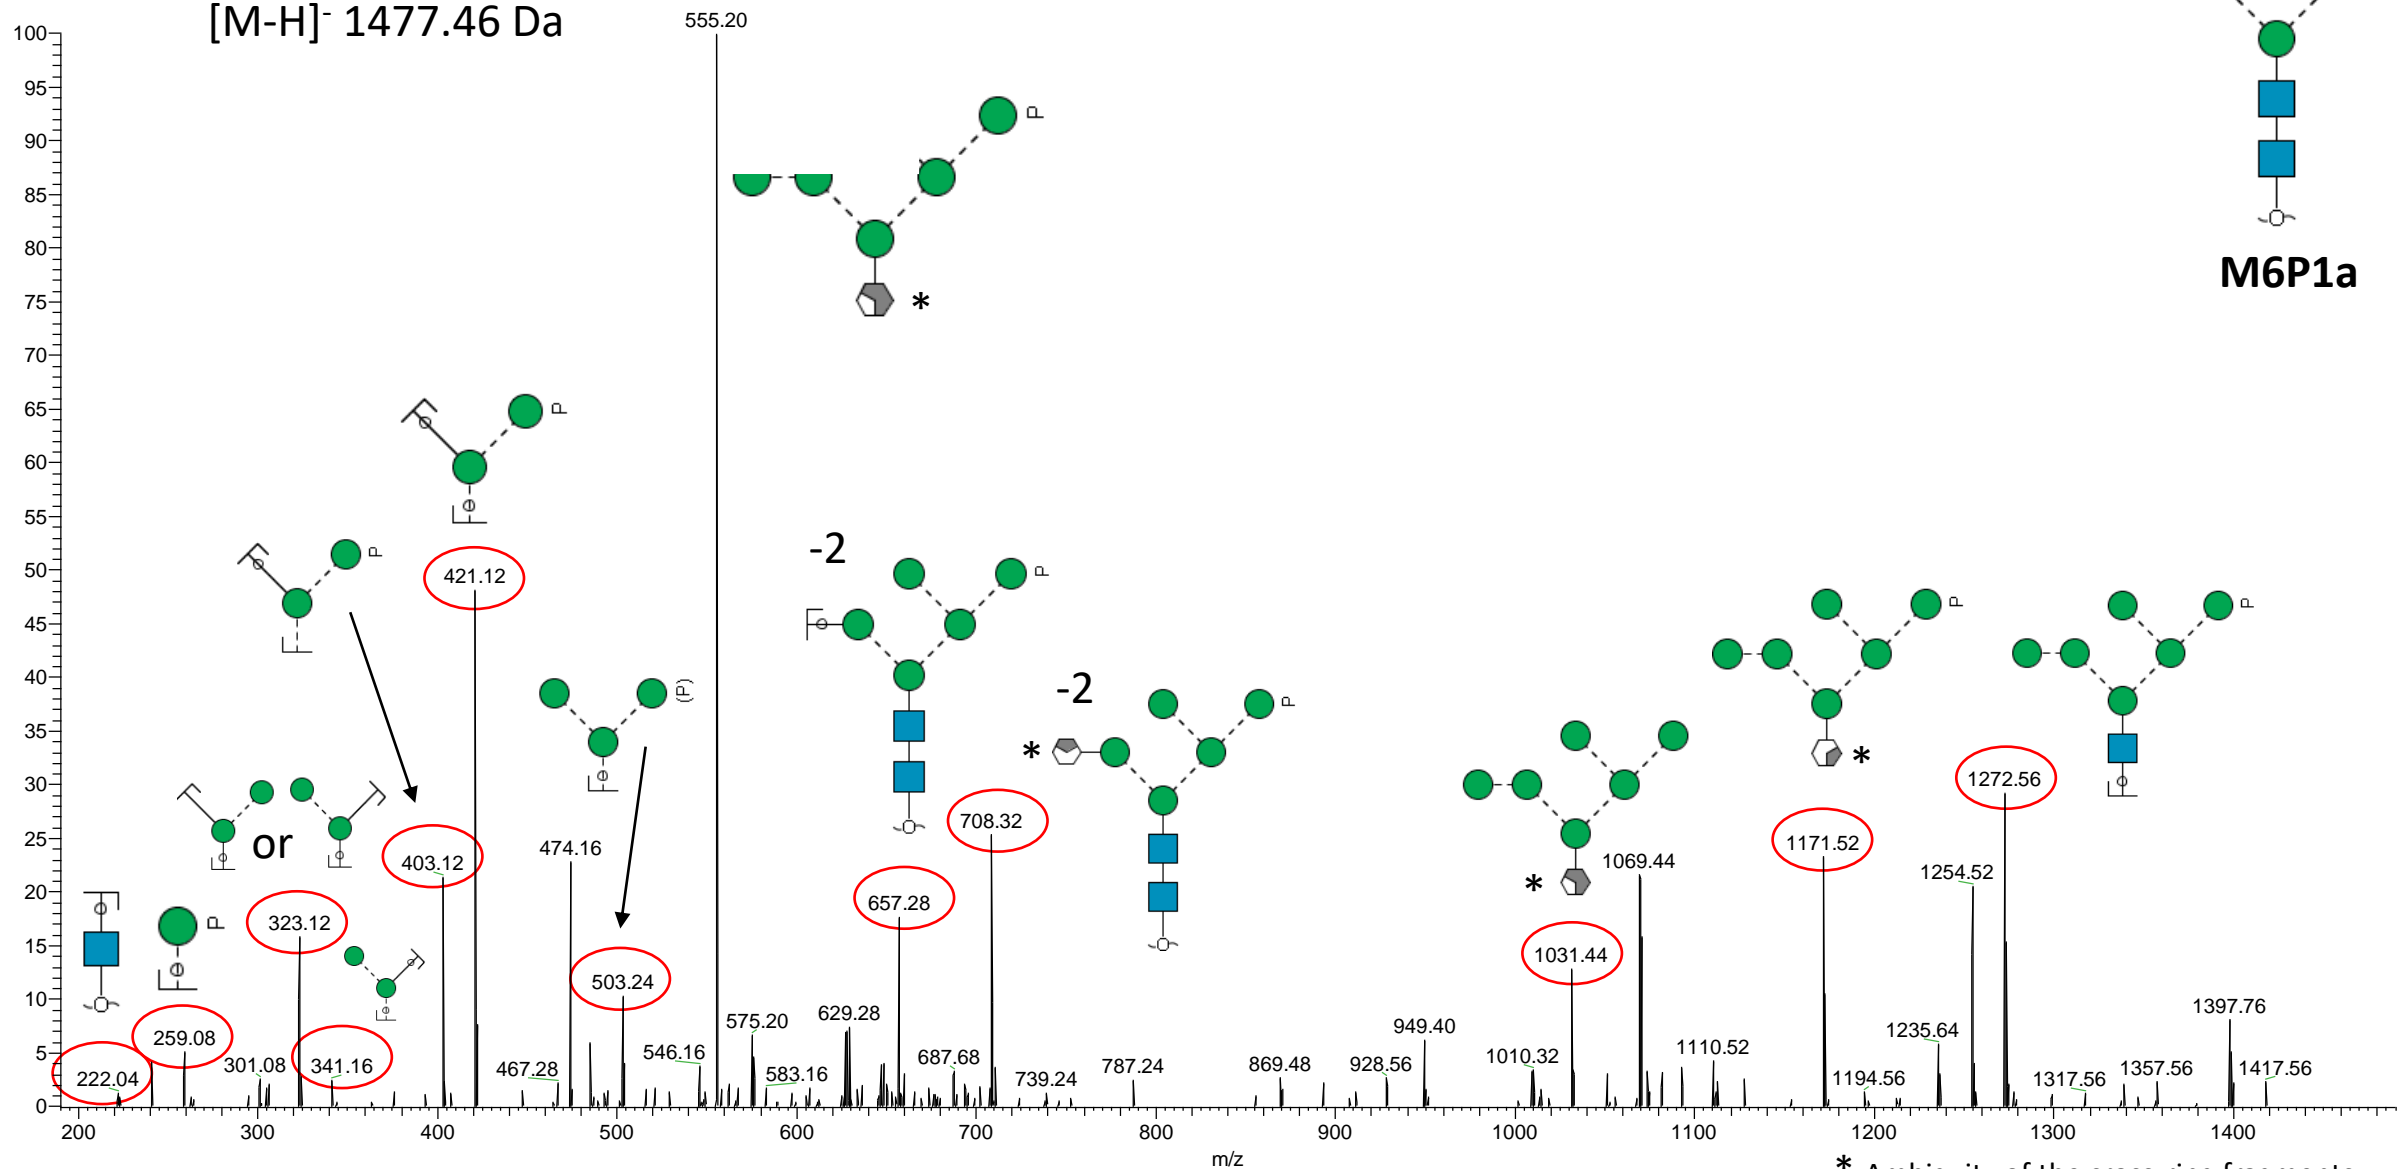

\* Ambiguity of the cross-ring fragments

# Glycan #14b

Observed  $m/z$  738.23 (2-), RT: ~18.5 min  
[M-H]<sup>-</sup> 1477.46 Da

Note: Based on knowledge of the M6P pathway, the phosphate moiety appears on outer mannose residue, but no MS/MS evidence to support the exact position.

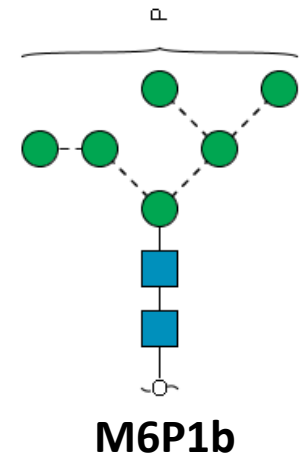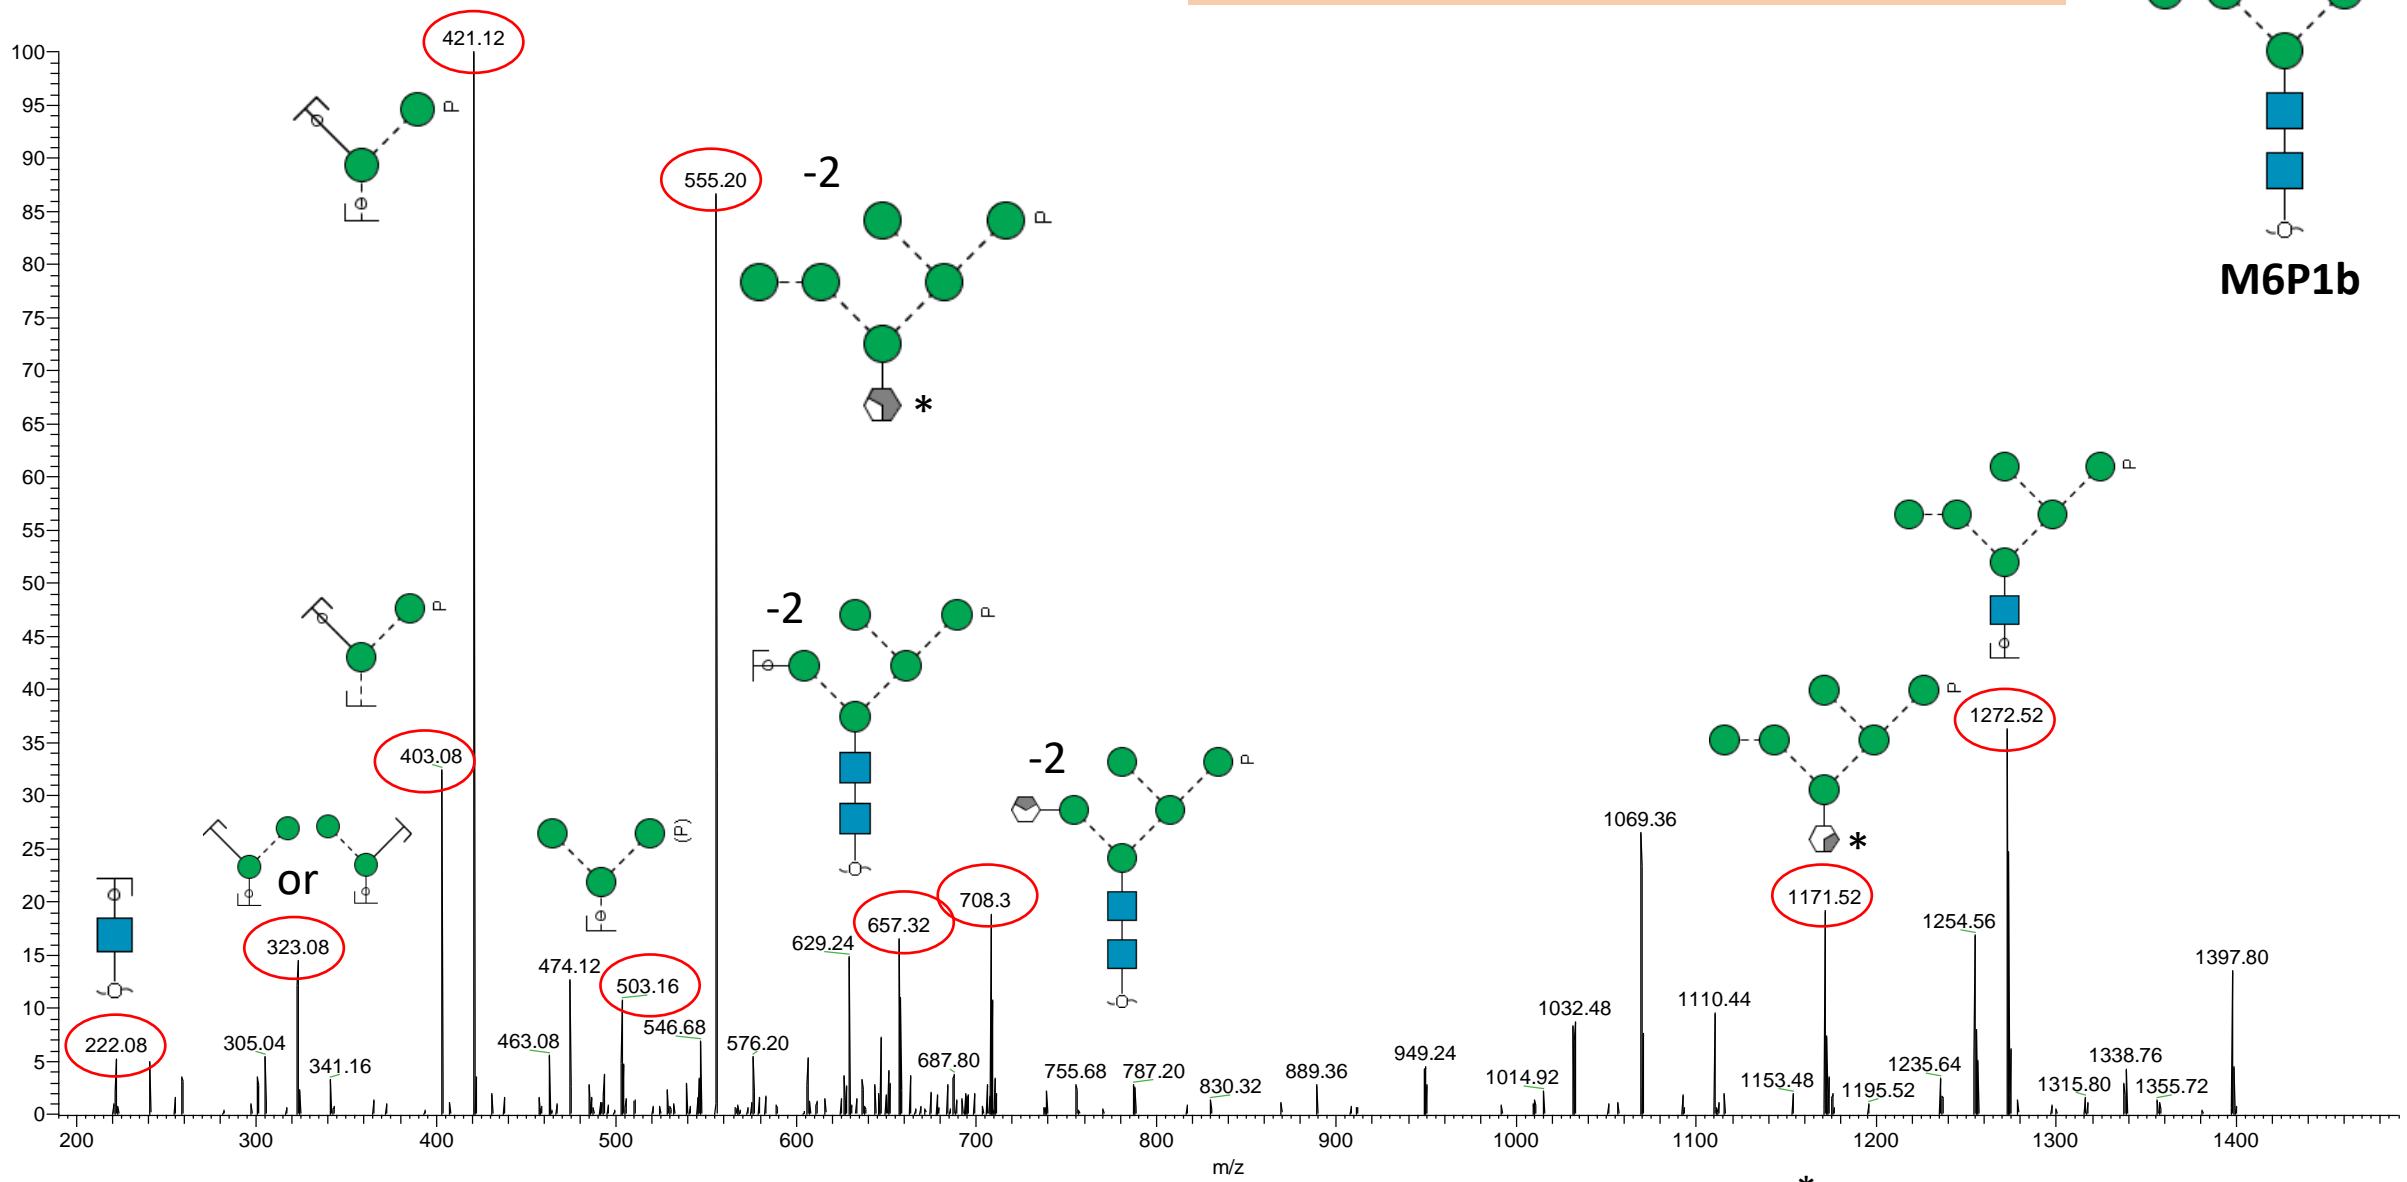

\* Ambiguity of the cross-ring fragments

# Glycan #15

Observed  $m/z$  819.32 (2-), RT: ~17.8 min

$[M-H]^-$  1639.51 Da

Note: Based on knowledge of the M6P pathway, the phosphate moiety appears on outer mannose residue, but no MS/MS evidence to support the exact position of the phosphate.

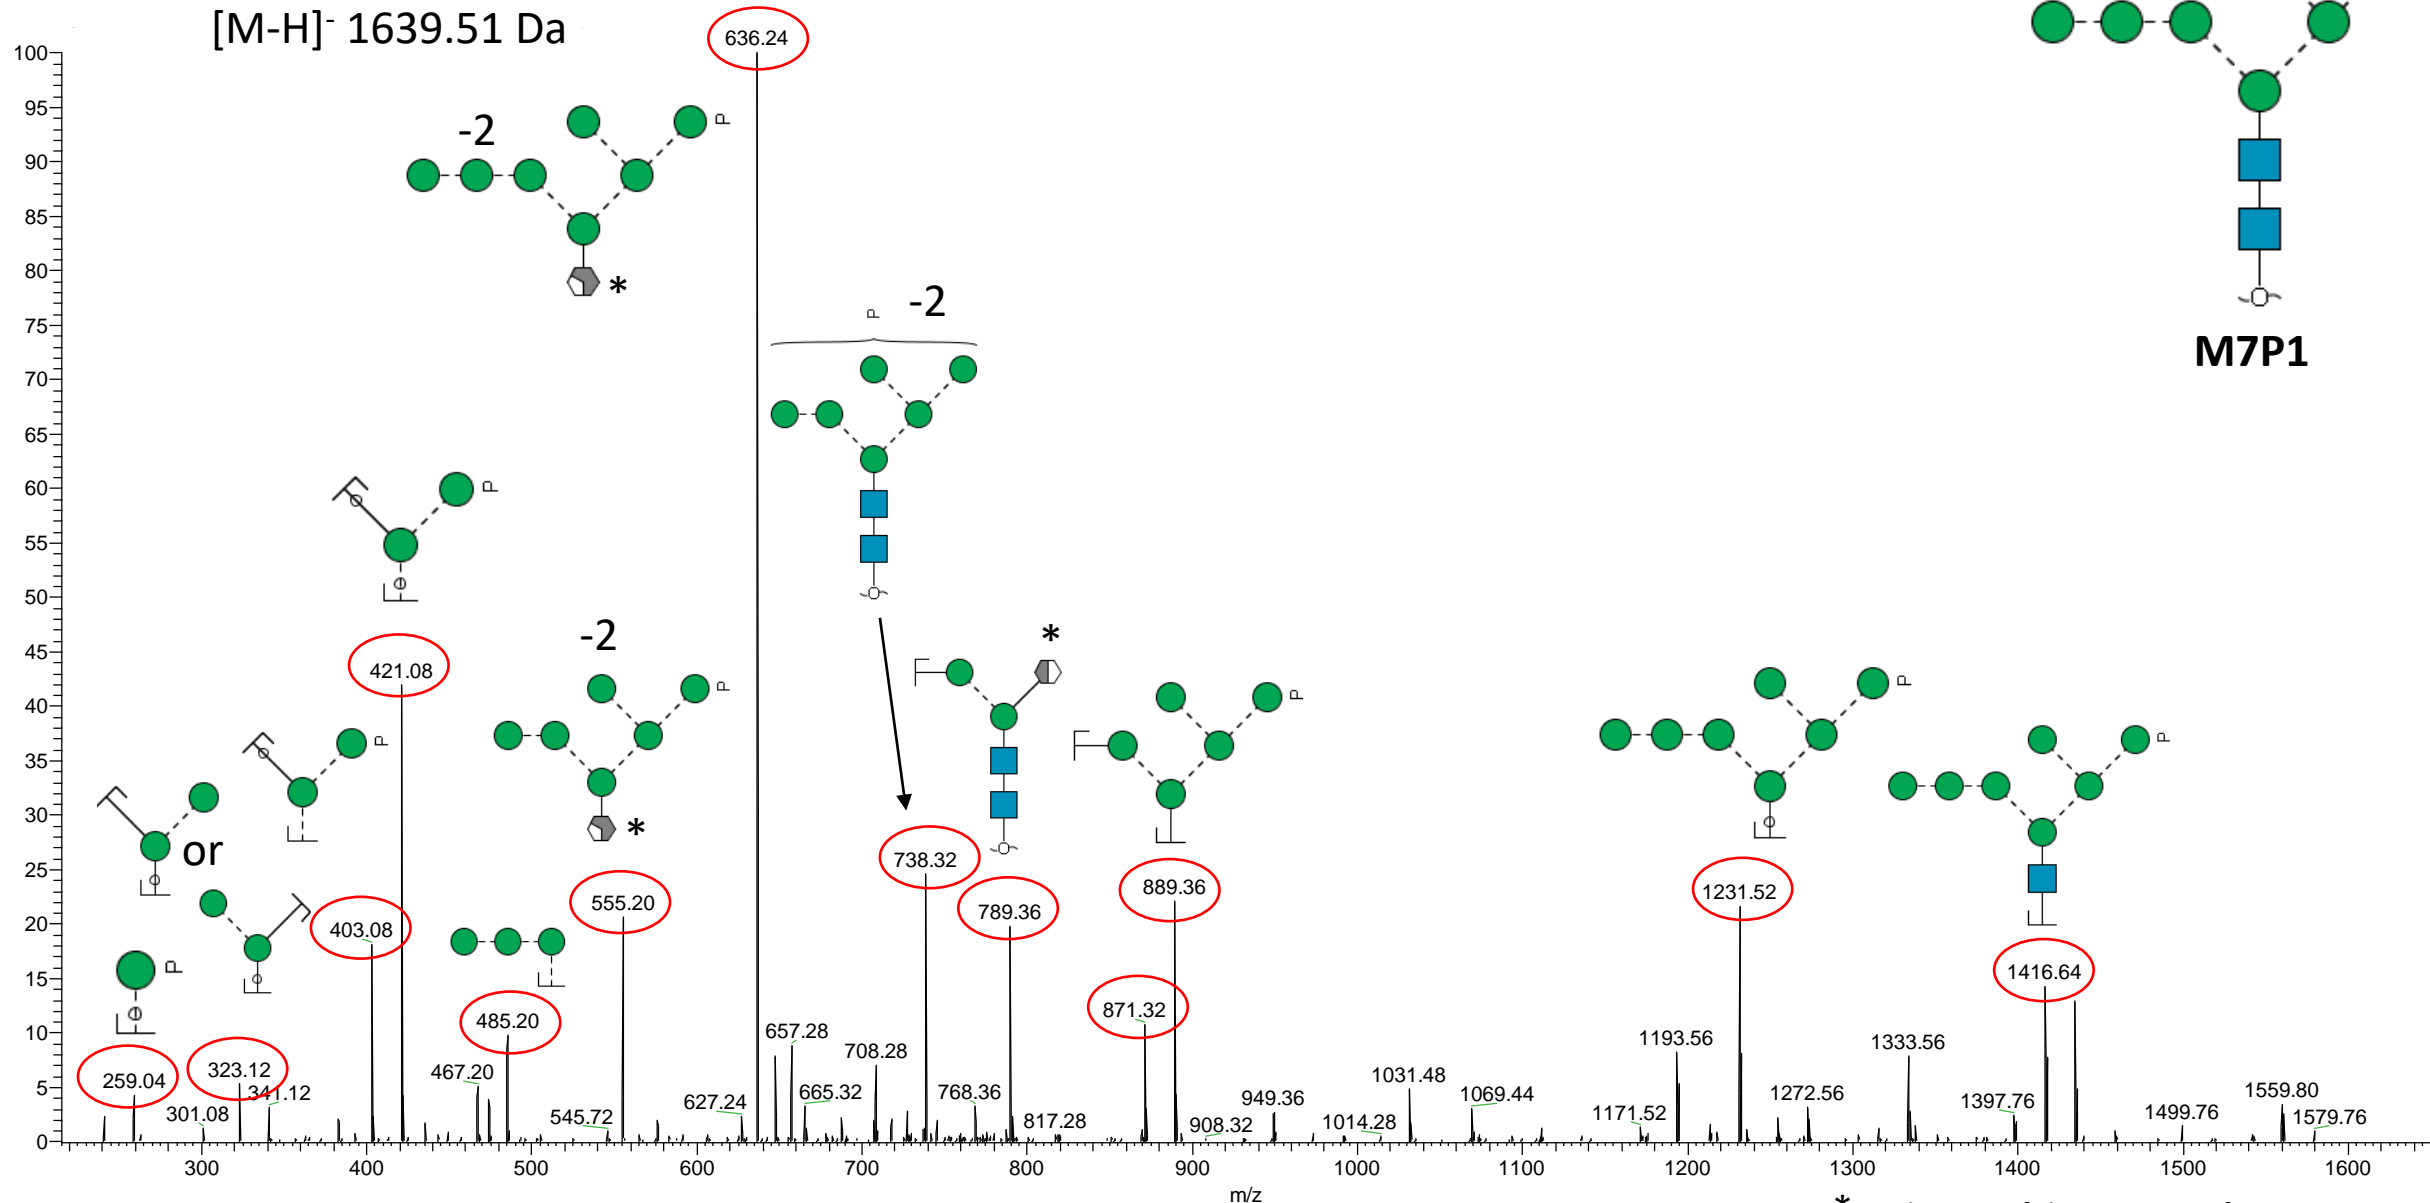

\* Ambiguity of the cross-ring fragments

# Glycan #16

Observed  $m/z$  1260.60 (1-), RT: ~33.7 min  
[M-H]<sup>-</sup> 1260.47 Da

Note: From biosynthetic pathway, the single  $\beta$ 1,2-GlcNAc residue is predicted to occupy the  $\alpha$ -1,3 arm but no MS/MS evidence to support this, so here left unassigned.

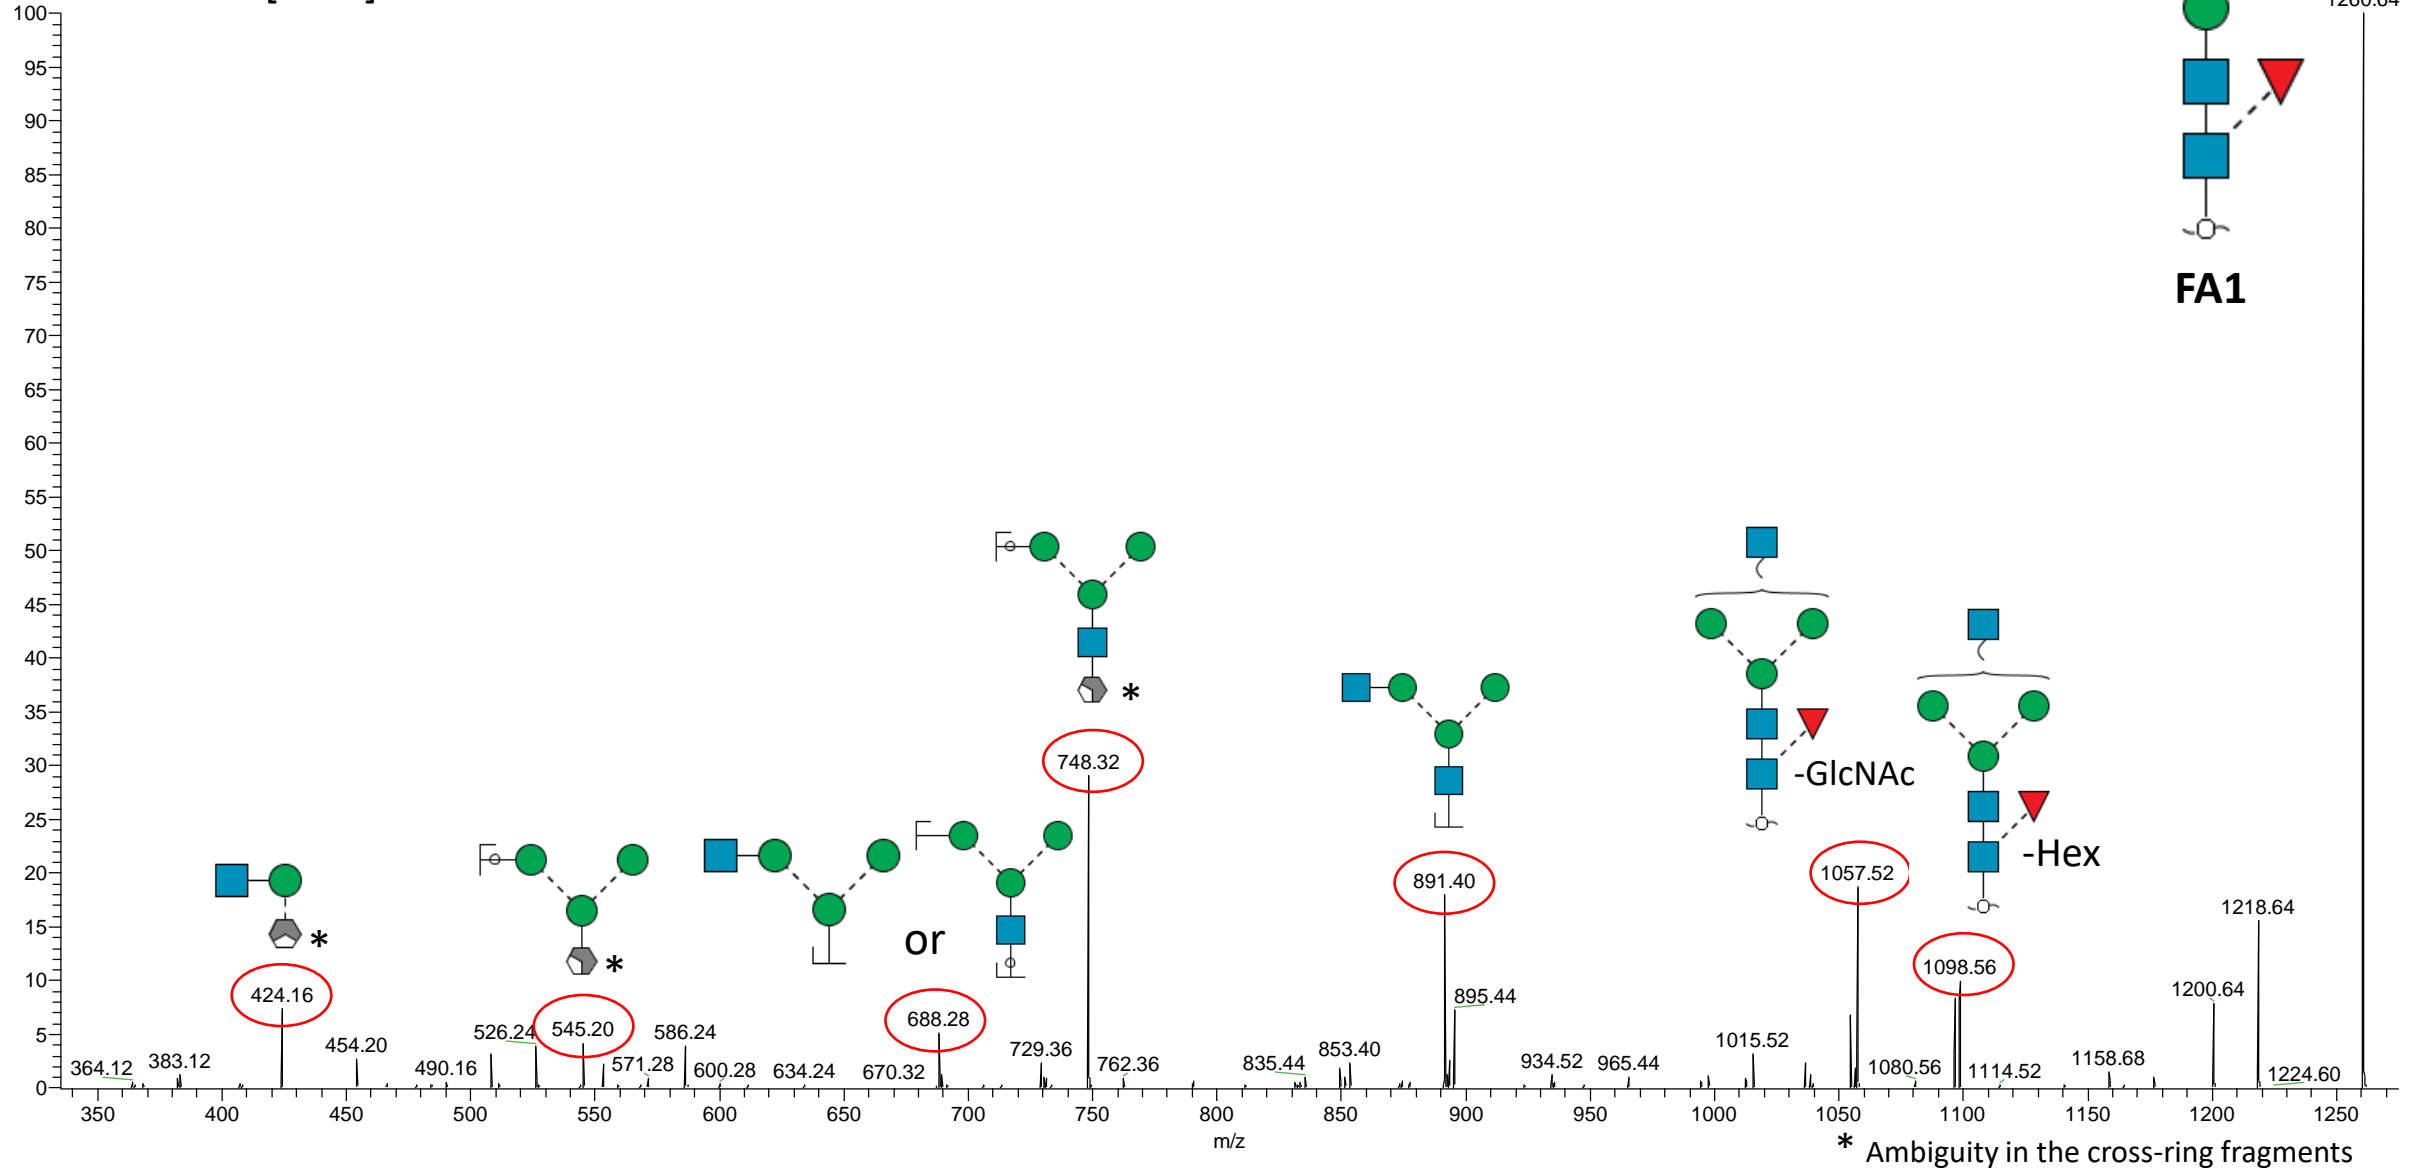

# Glycan #17

Observed  $m/z$  731.28 (2-), RT: ~26.1 min

$[M-H]^-$  1463.55 Da

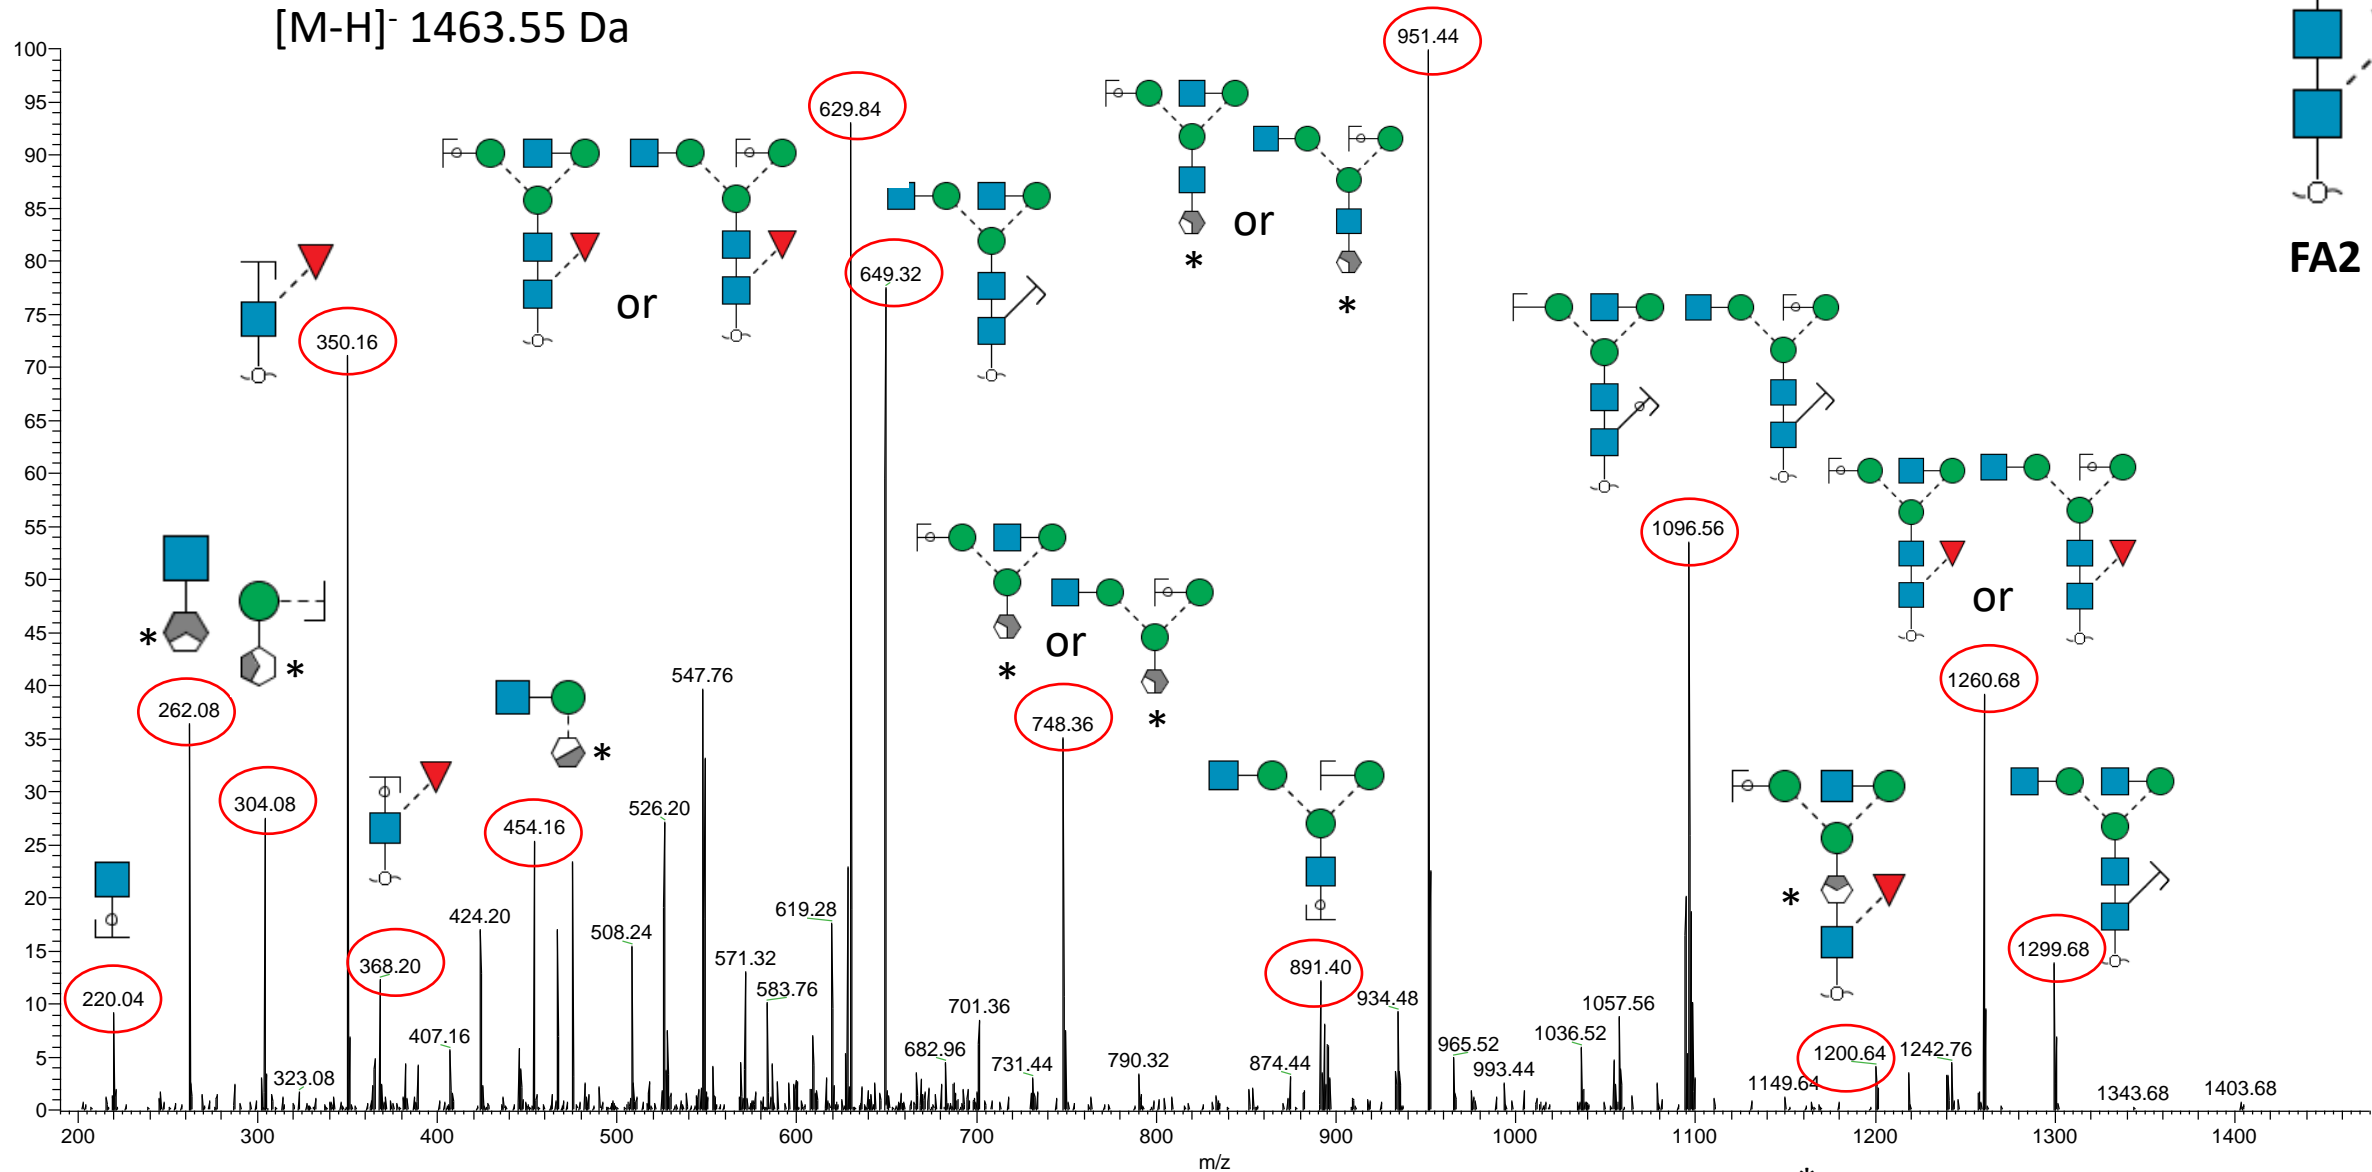

\* Ambiguity of the cross-ring fragments



# Glycan #18

Observed  $m/z$  783.28 (2-), RT: ~22.3 min  
[M-H]<sup>-</sup> 1567.56 Da

Note: This glycan is annotated as the  $\alpha$ 2,6-sialyl linkage isomer based on the early PGC-LC elution and experience with neutrophil N-glycan profiling. The elongated antenna is known to frequently occupy the  $\alpha$ 1,3-arm rather than the  $\alpha$ 1,6-arm of neutrophil N-glycans and have thus been assigned as such.

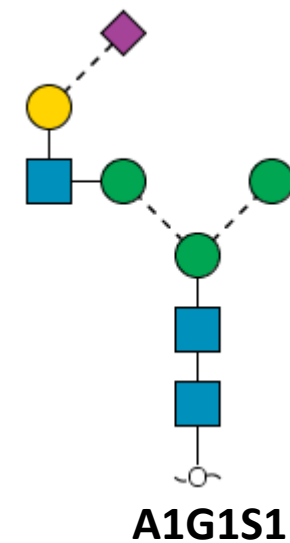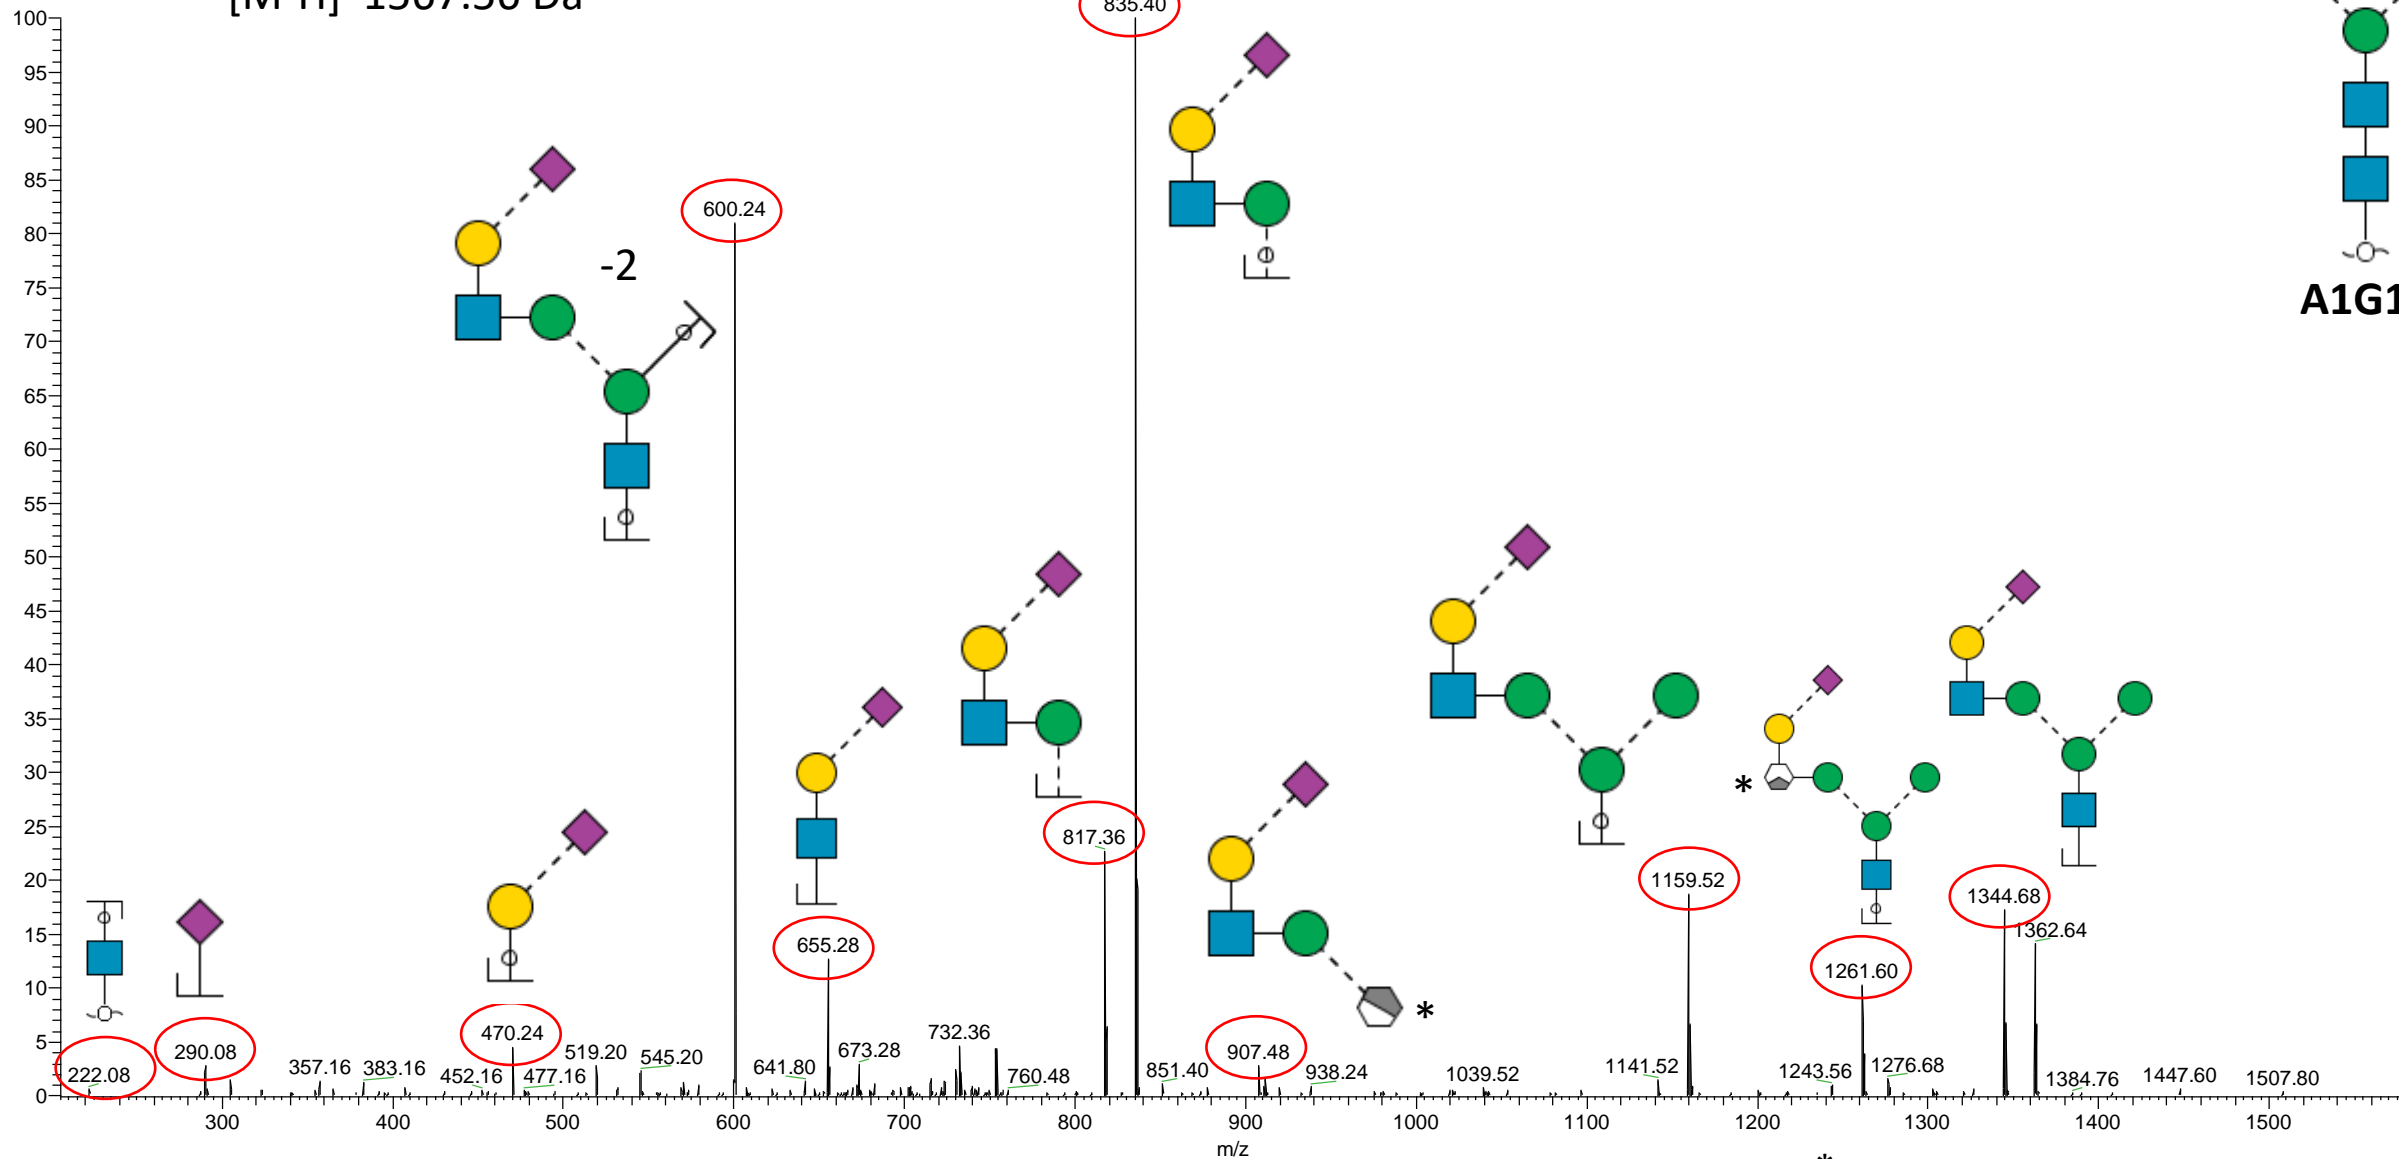

\* Ambiguity in the cross-ring fragments

# Glycan #19a

Note: This glycan is annotated as the  $\alpha$ 2,6-sialyl linkage isomer based on the early PGC-LC elution and experience with neutrophil *N*-glycan profiling. The elongated antenna is known to frequently occupy the  $\alpha$ 1,3-arm rather than the  $\alpha$ 1,6-arm of neutrophil *N*-glycans and have thus been assigned as such.

Observed  $m/z$  856.31 (2-), RT: ~27.9 min  
[M-H]<sup>-</sup> 1713.62 Da

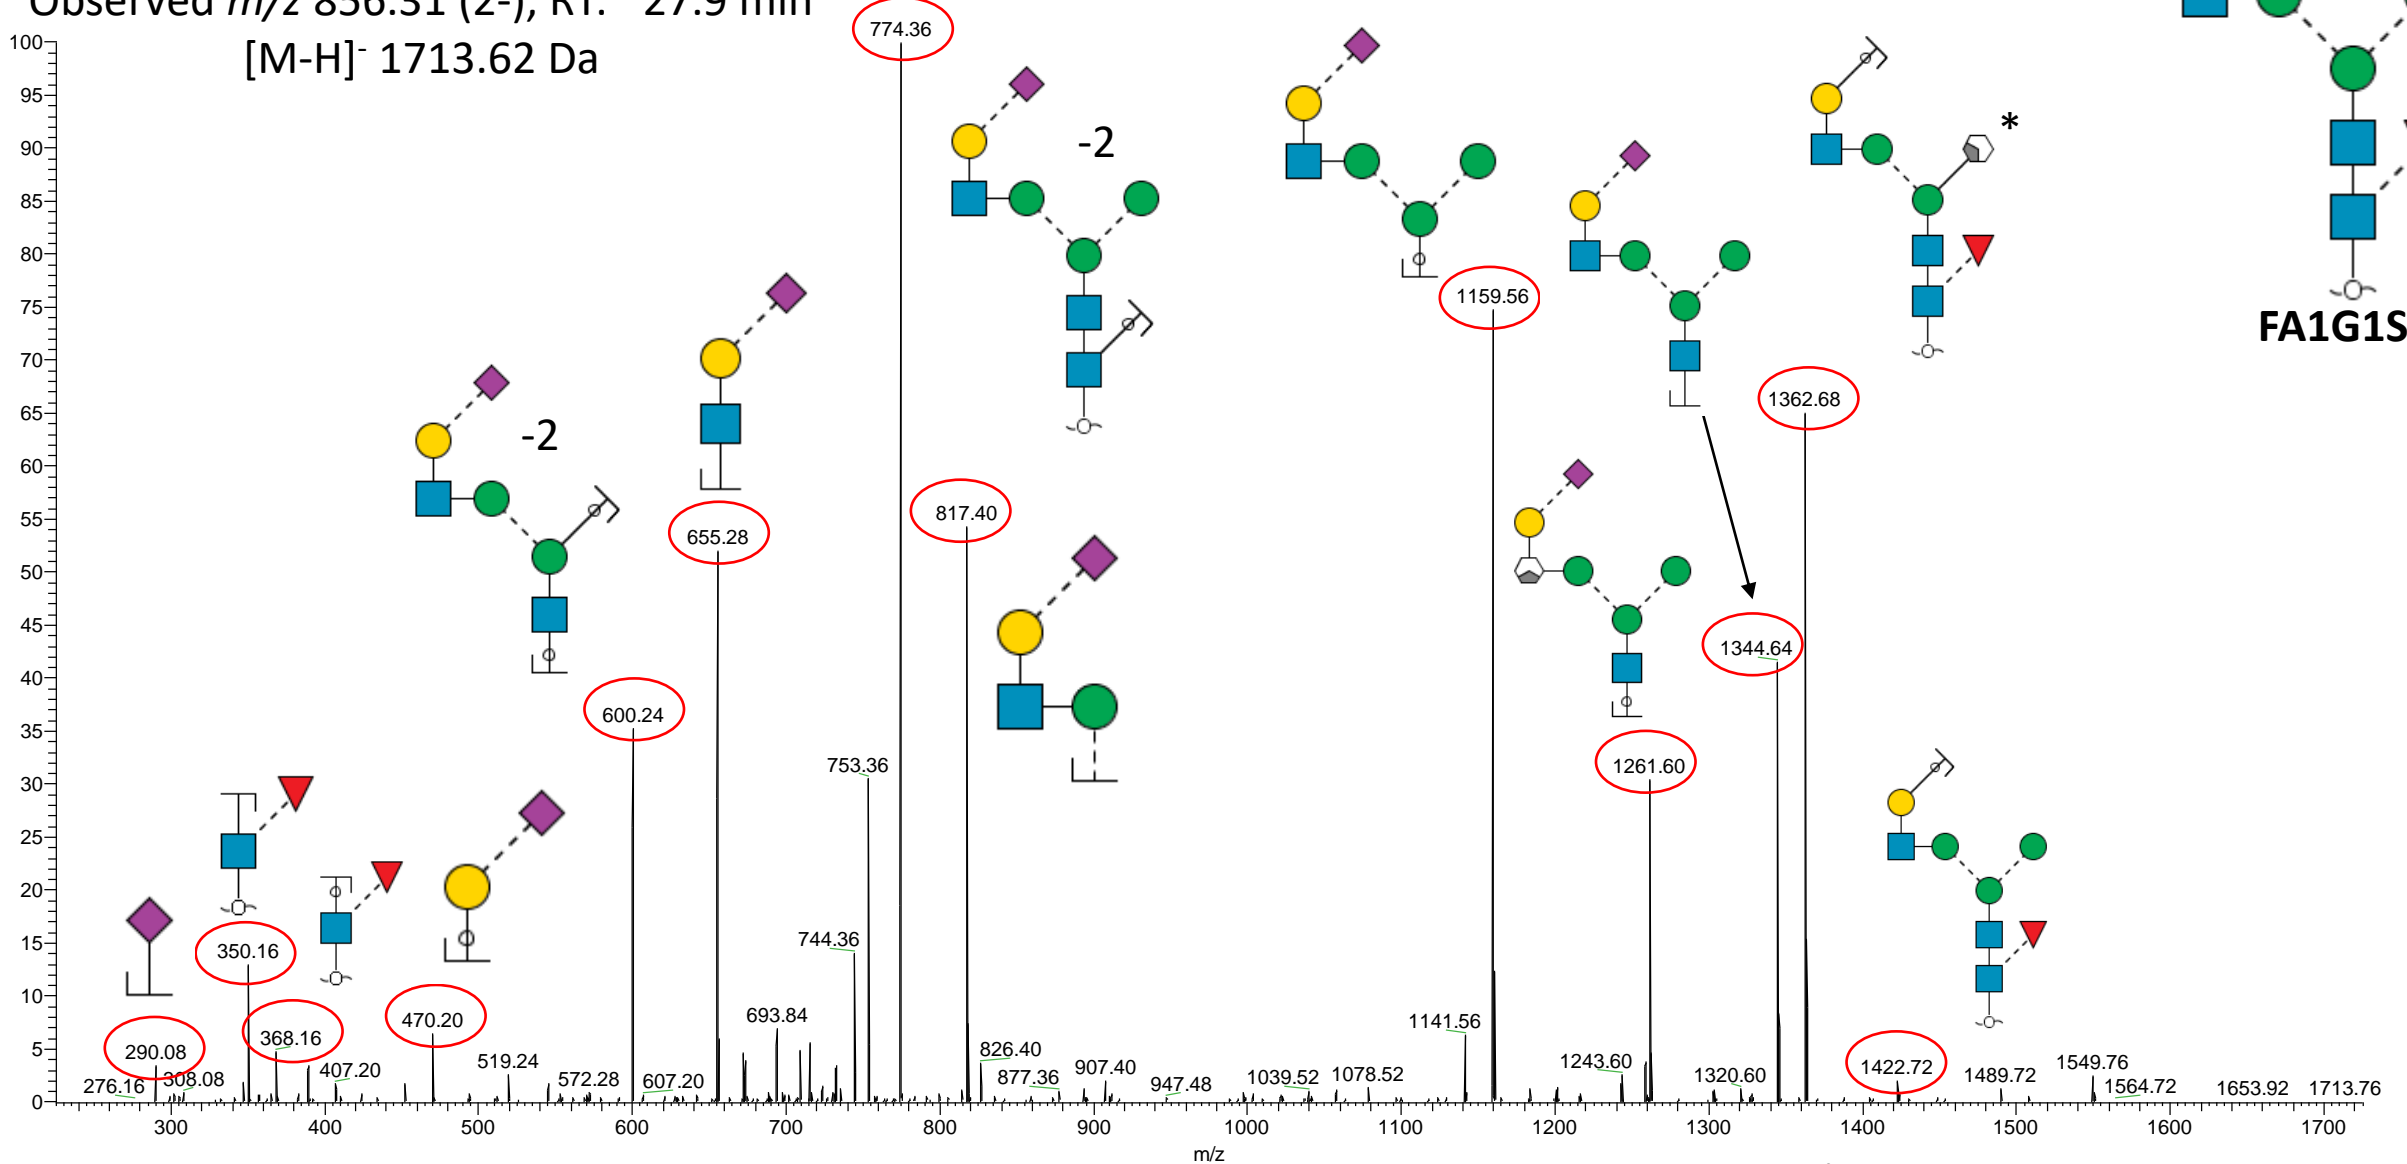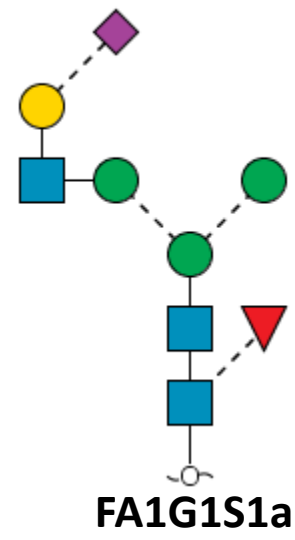

\* Ambiguity of the cross-ring fragments

# Glycan #19b

Note: This glycan is annotated as the  $\alpha$ 2,3-sialyl linkage isomer based on the late PGC-LC elution and experience with neutrophil *N*-glycan profiling. The elongated antenna is known to frequently occupy the  $\alpha$ 1,3-arm rather than the  $\alpha$ 1,6-arm of neutrophil *N*-glycans and is thus assigned as such.

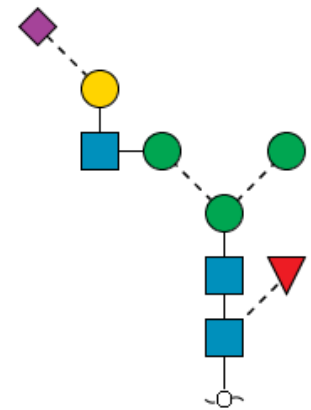

FA1G1S1b

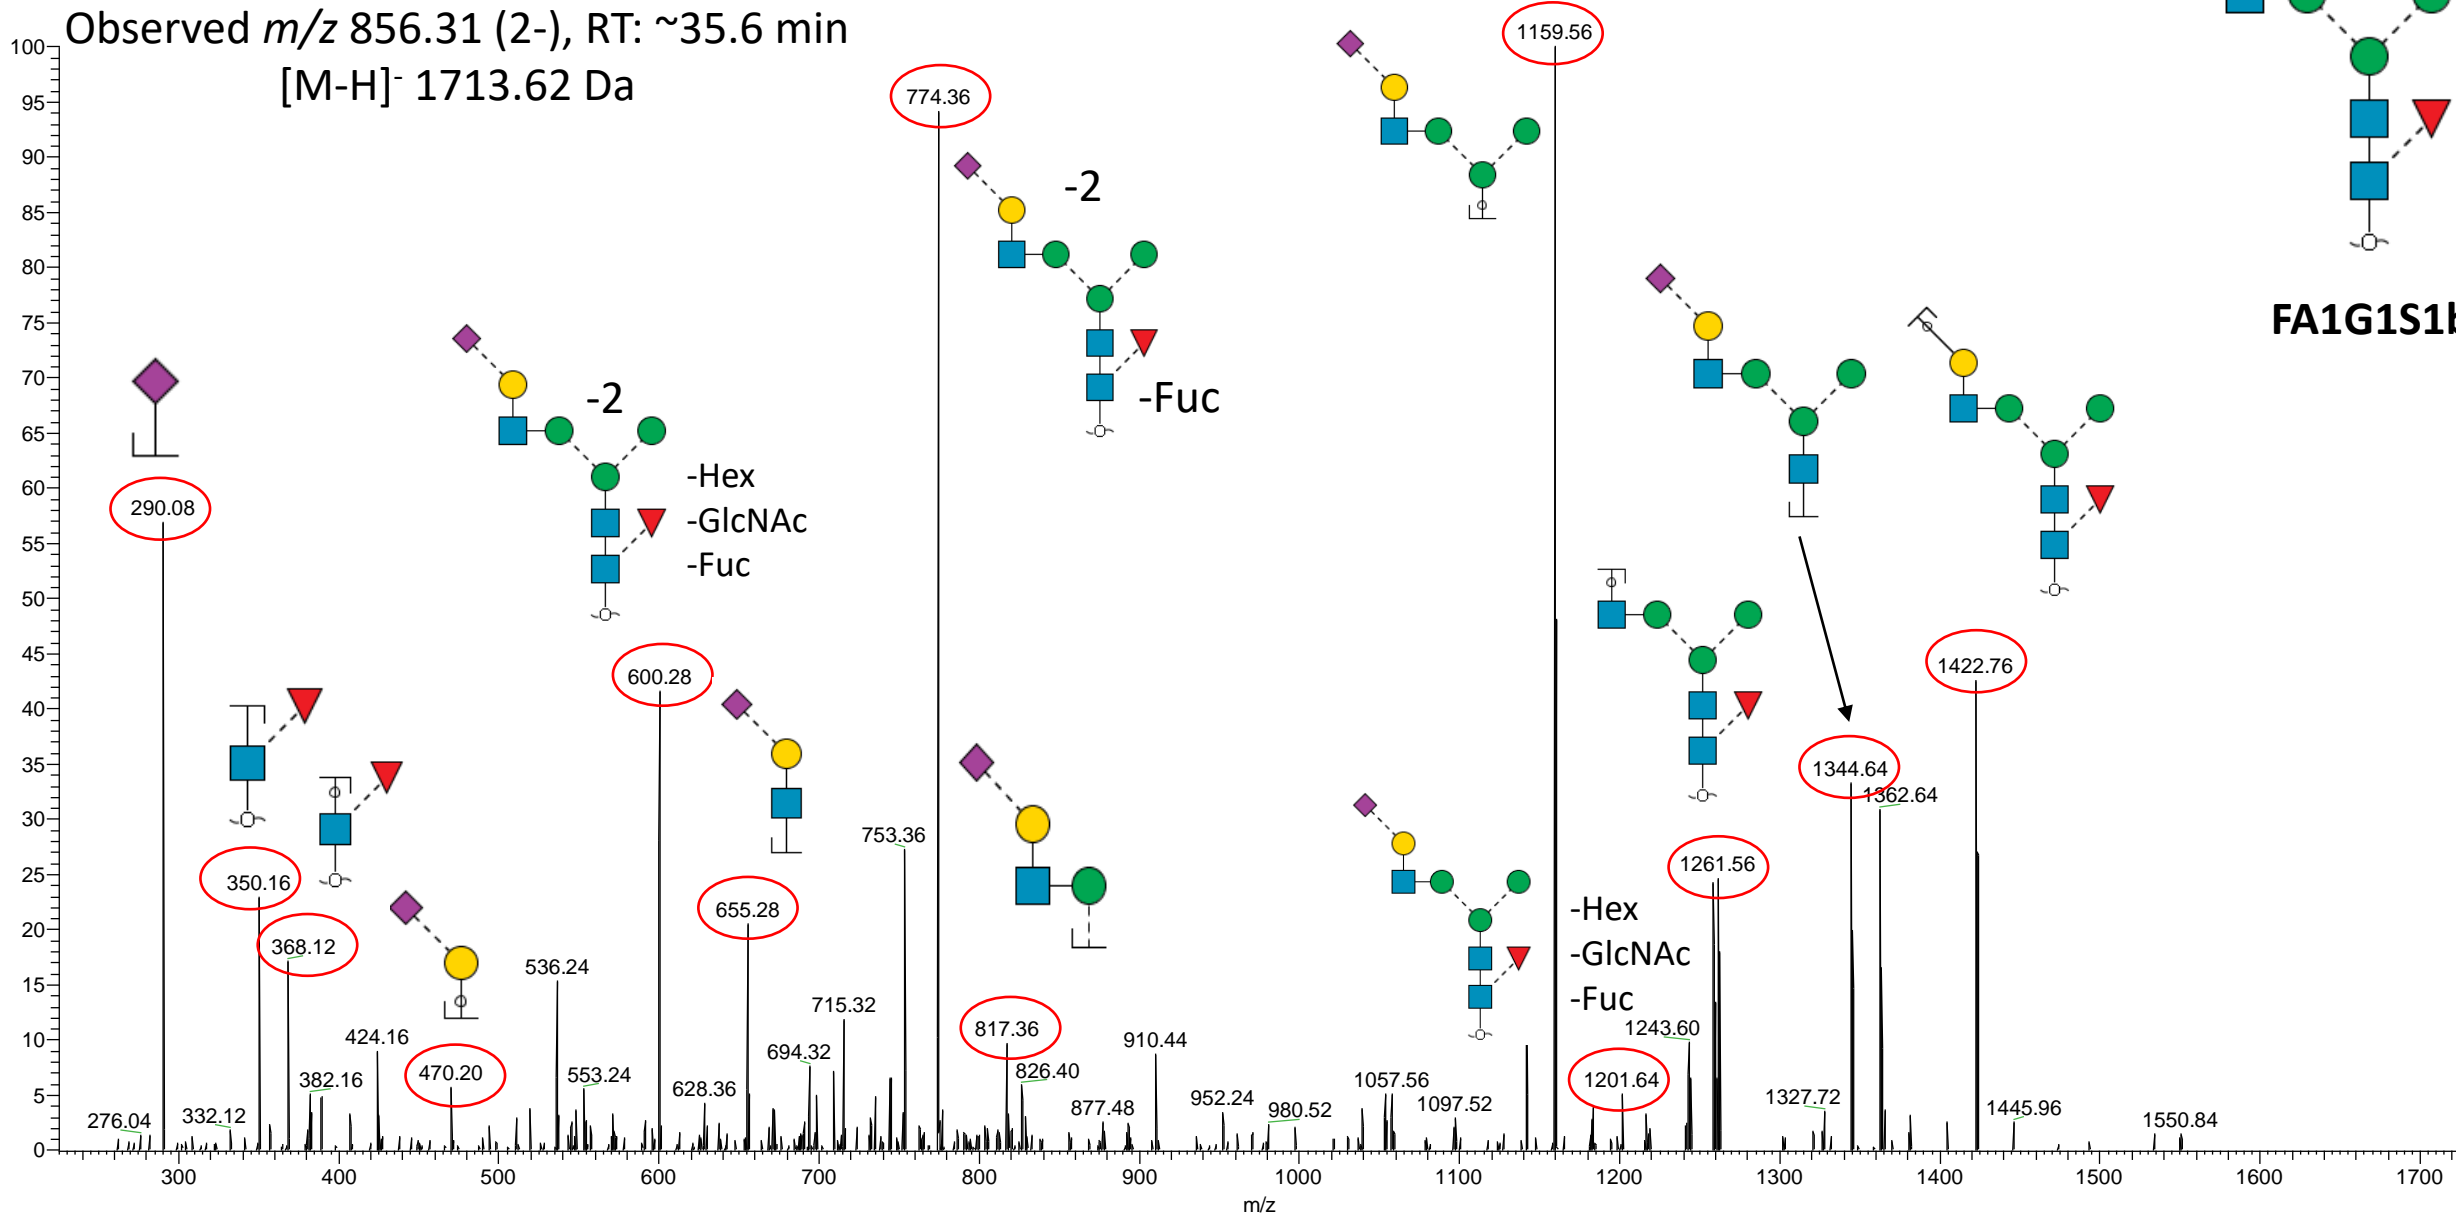

\* Ambiguity of the cross-ring fragments

# Glycan #19c

Note: This low abundance glycan is possibly the isomer where the Sia-Gal-GlcNAc antenna occupy the  $\alpha$ 1,6-arm rather than the  $\alpha$ 1,3-arm common for neutrophil *N*-glycans but no direct MS/MS evidence to support this

Observed  $m/z$  856.31 (2-), RT: ~43.8 min  
[M-H]<sup>-</sup> 1713.62 Da

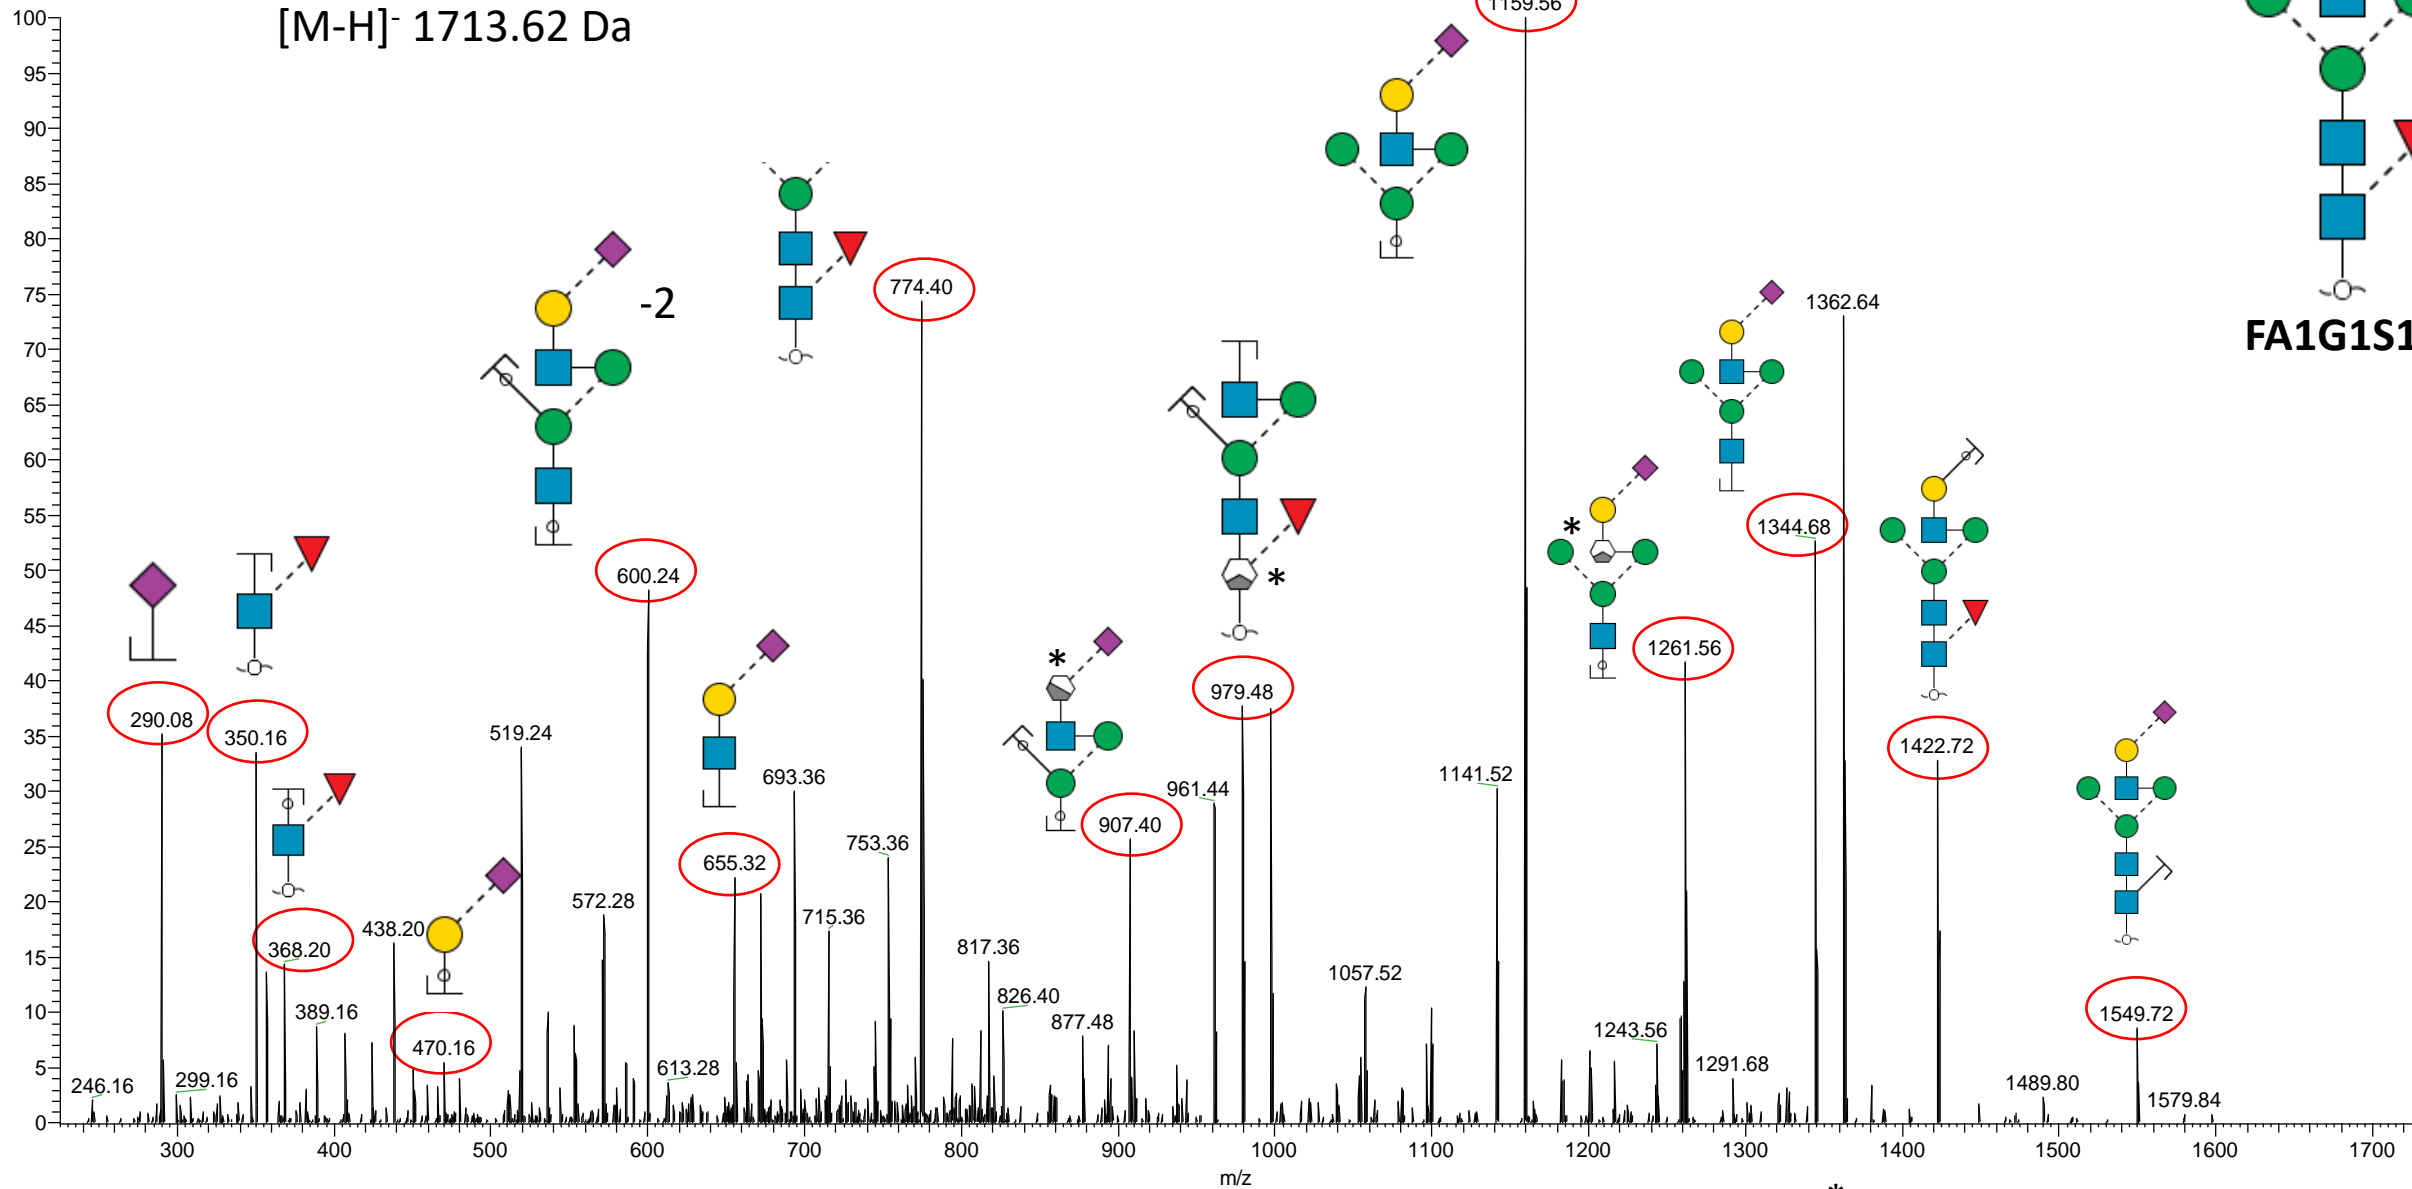

\* Ambiguity of the cross-ring fragments

# Glycan #20a

Note: This glycan is annotated as the  $\alpha$ 2,6-sialyl linkage isomer based on the early PGC-LC elution and higher abundance (relative to Glycan #20b) and experience with neutrophil *N*-glycan profiling. The elongated antenna is known to frequently occupy the  $\alpha$ 1,3-arm rather than the  $\alpha$ 1,6-arm of neutrophil *N*-glycans and is thus represented as such.

Observed  $m/z$  957.85 (2-), RT: ~29.3 min

[M-H]<sup>-</sup> 1916.70 Da

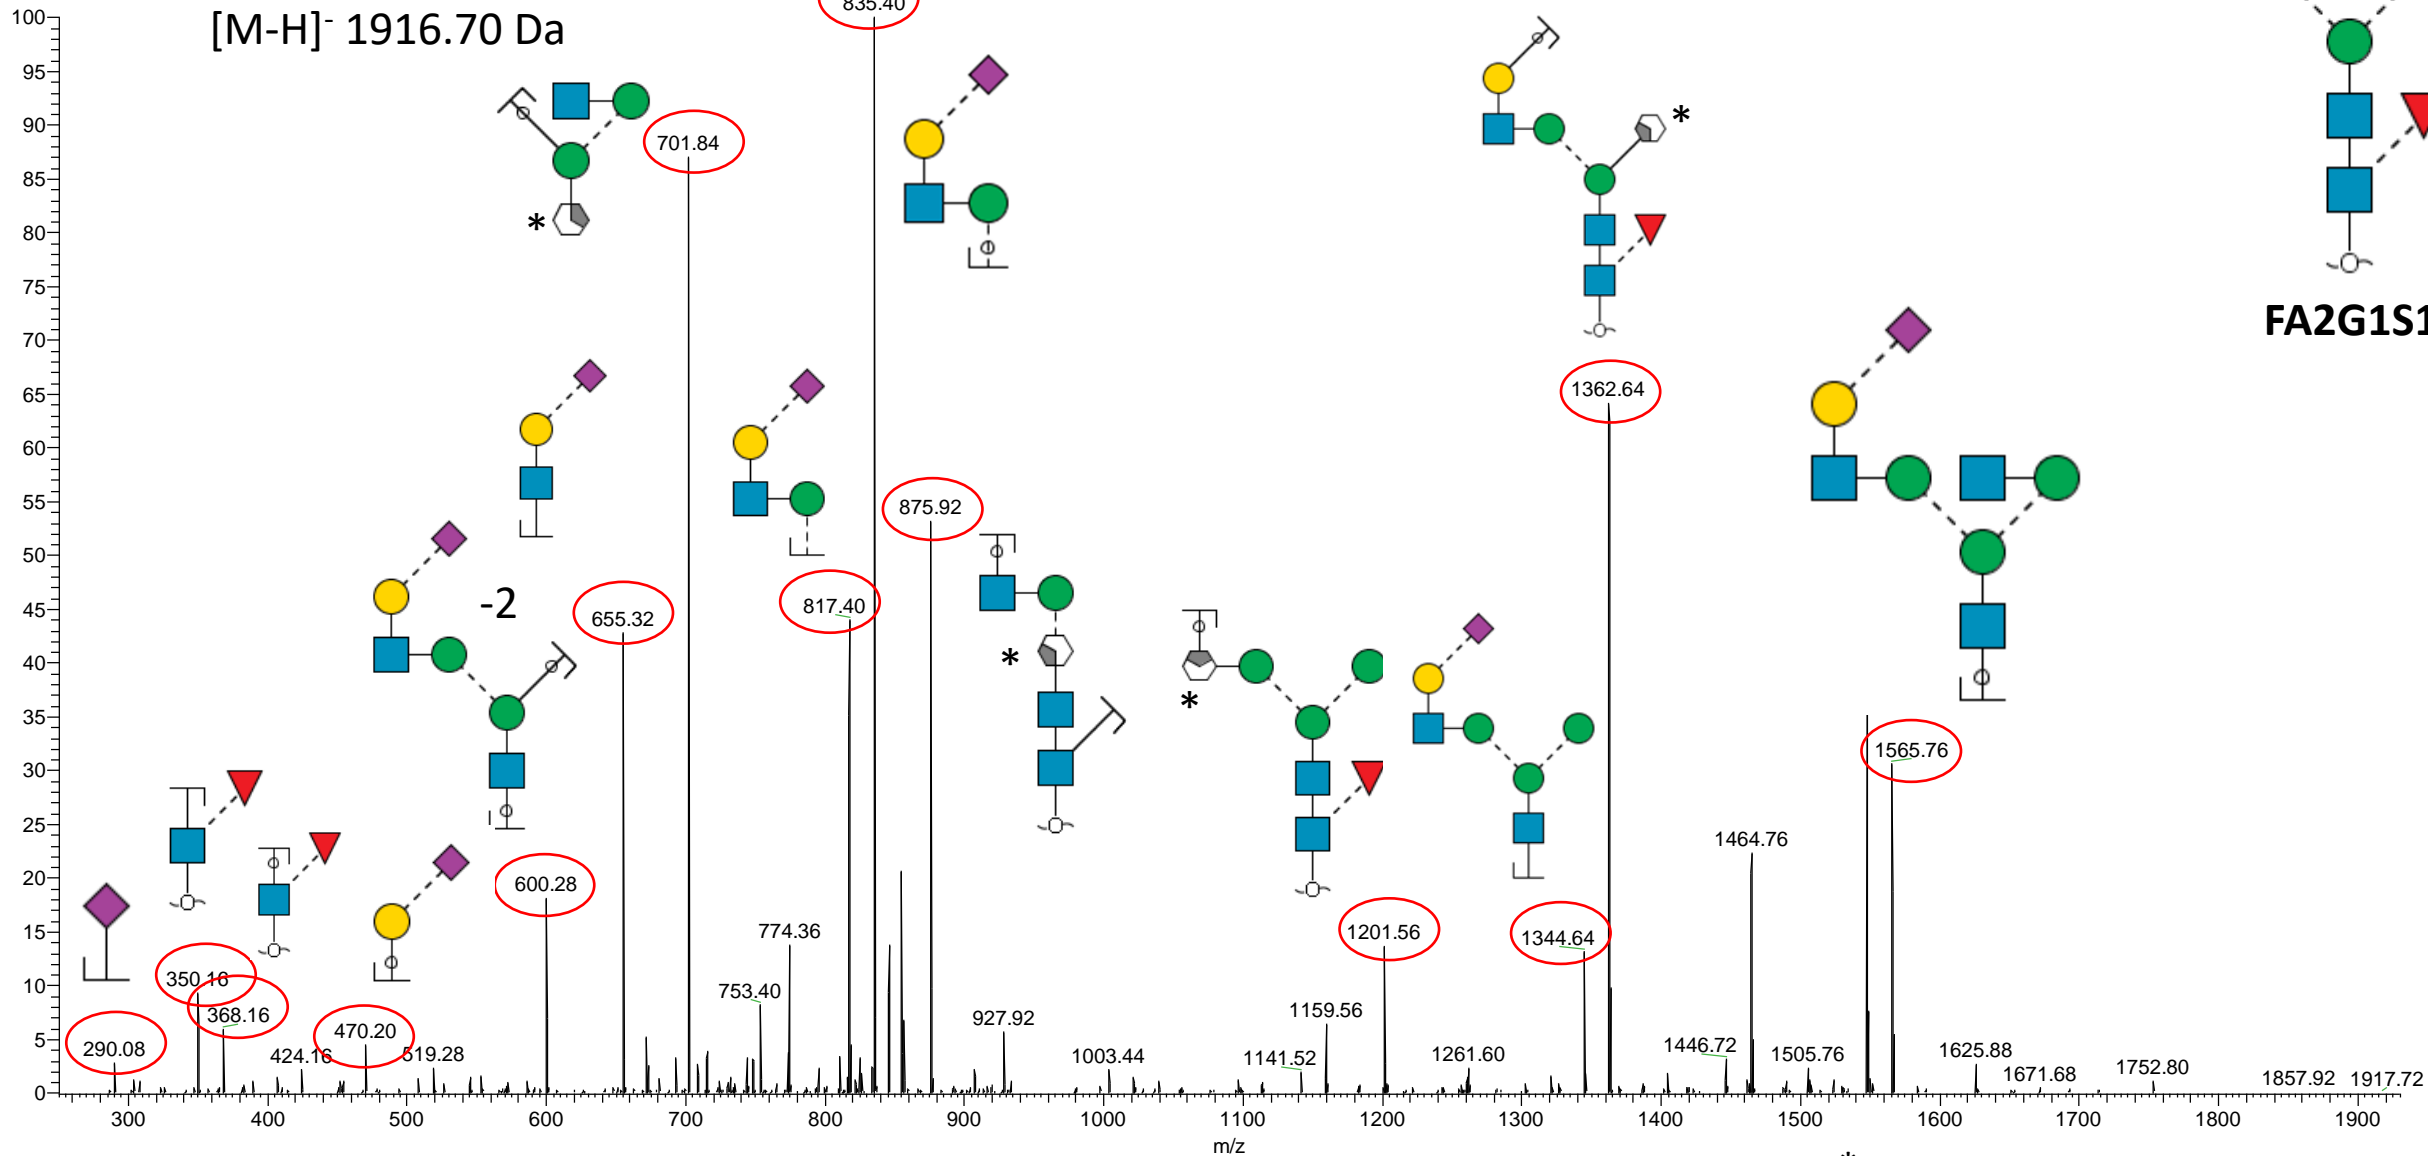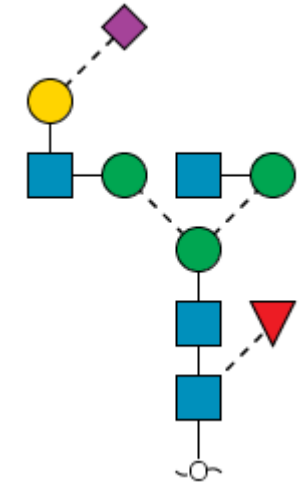

FA2G1S1a

\* Ambiguity of the cross-ring fragments

Note: This glycan is annotated as the  $\alpha$ 2,3-sialyl linkage isomer based on the later PGC-LC elution and lower abundance (relative to Glycan #20a) and experience with neutrophil *N*-glycan profiling. The elongated antenna is known to frequently occupy the  $\alpha$ 1,3-arm rather than the  $\alpha$ 1,6-arm of neutrophil *N*-glycans and have thus been assigned as such.

## Glycan #20b

Observed  $m/z$  957.85 (2-), RT: ~37.3 min

$[M-H]^-$  1916.70 Da

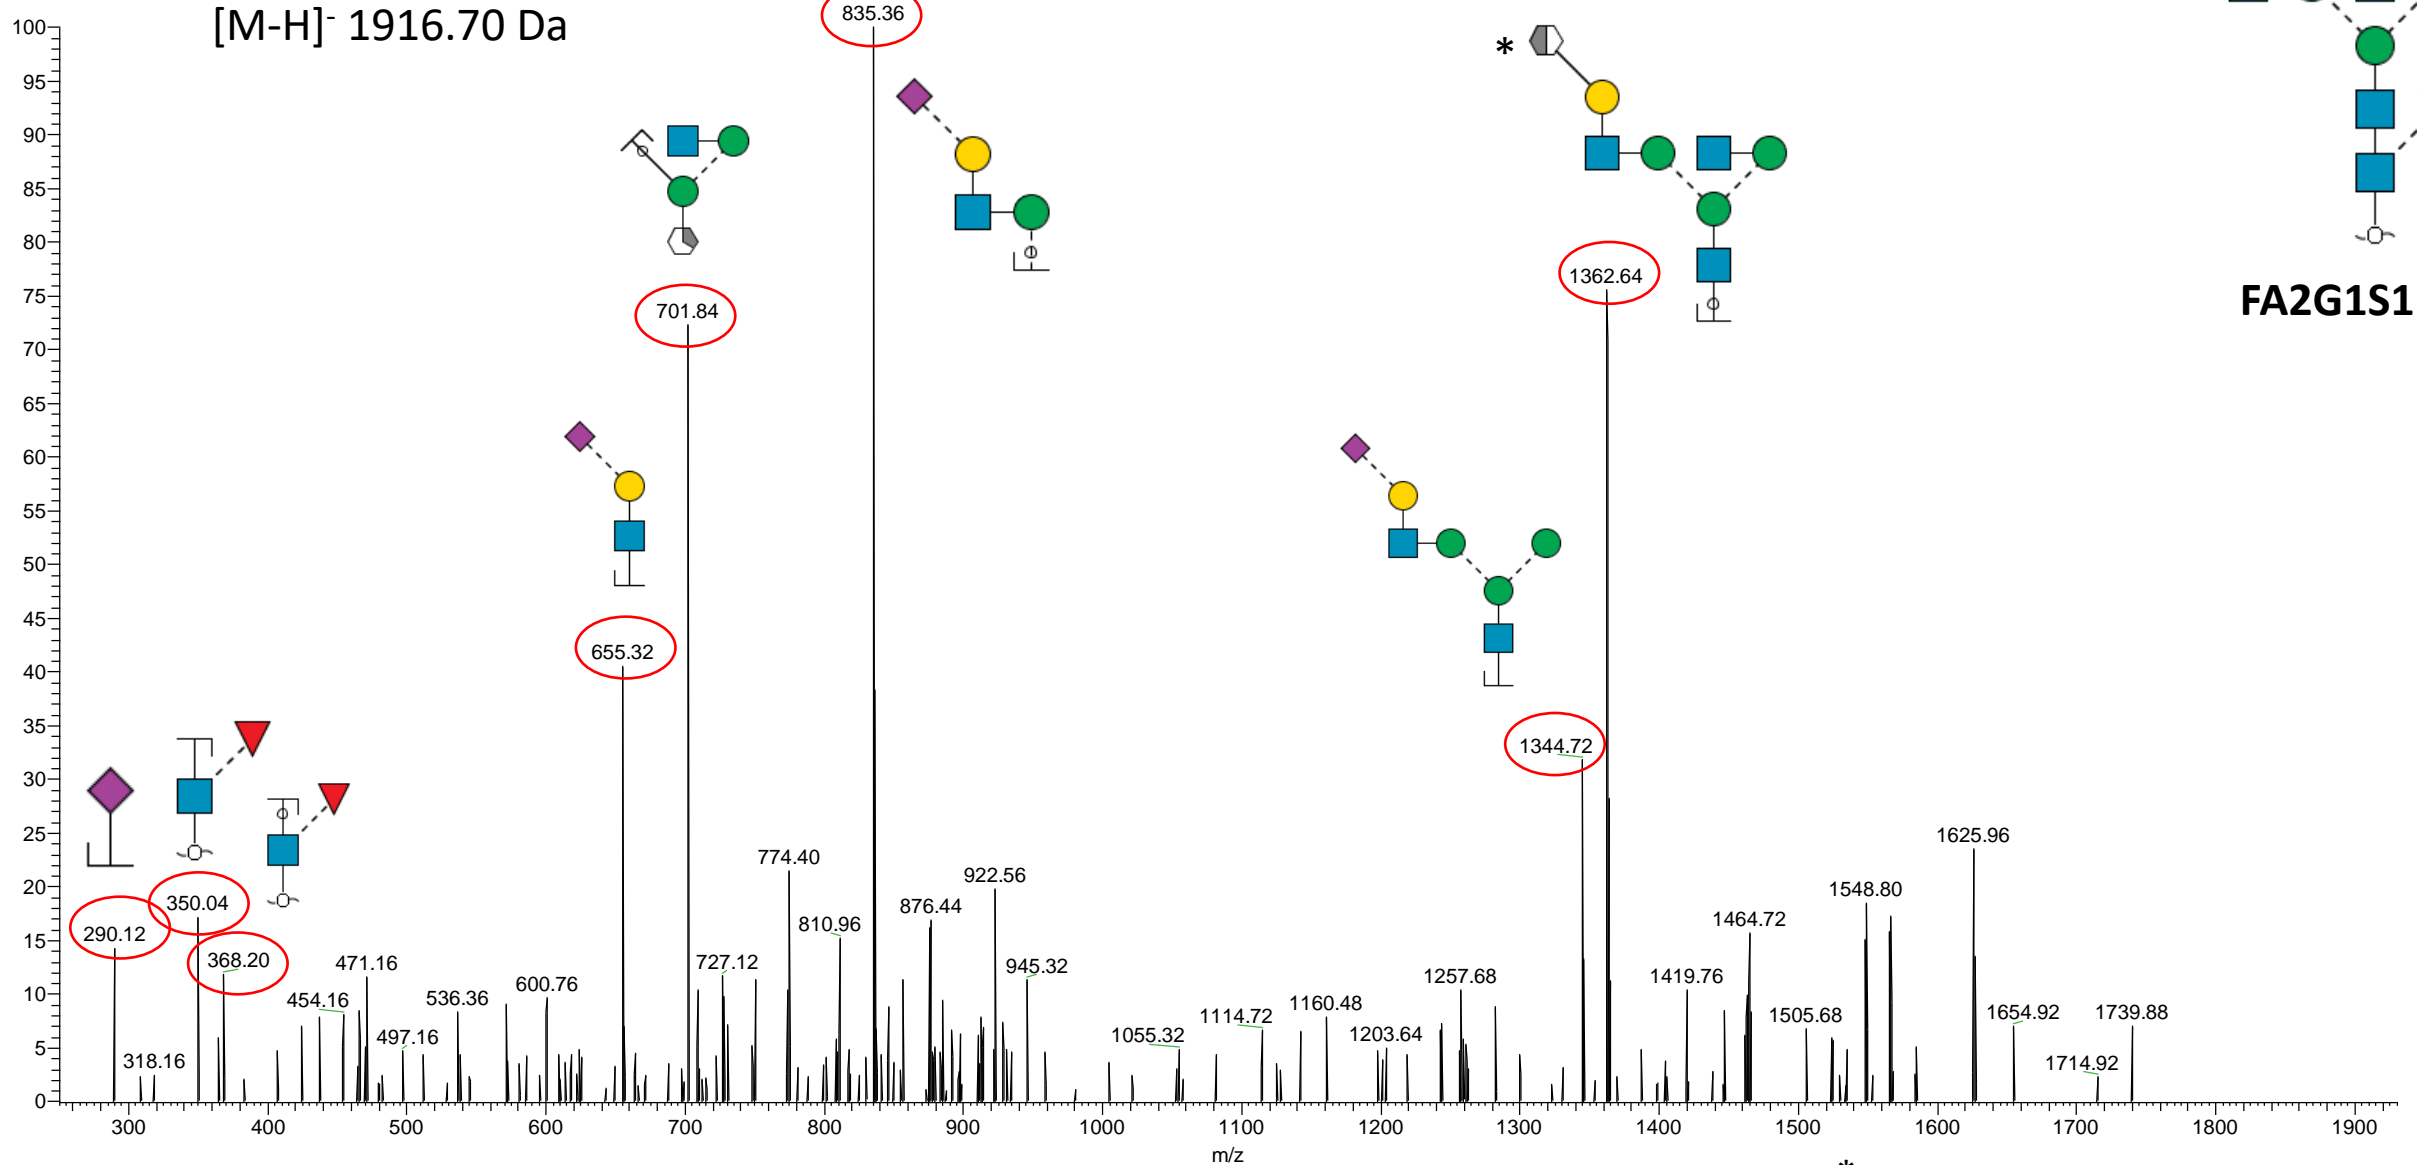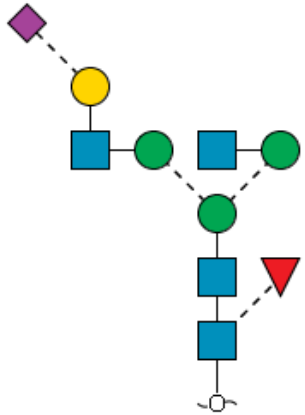

FA2G1S1b

\* Ambiguity in the cross-ring fragments

# Glycan #21

Note: This glycan is annotated as the  $\alpha$ 2,6-sialyl linkage isomer based on the early PGC-LC elution and experience with neutrophil *N*-glycan profiling. The arm position of the sialic acid could not be deduced.

Observed  $m/z$  1038.88 (2-), RT: ~31.3 min

$[M-H]^-$  2078.75 Da

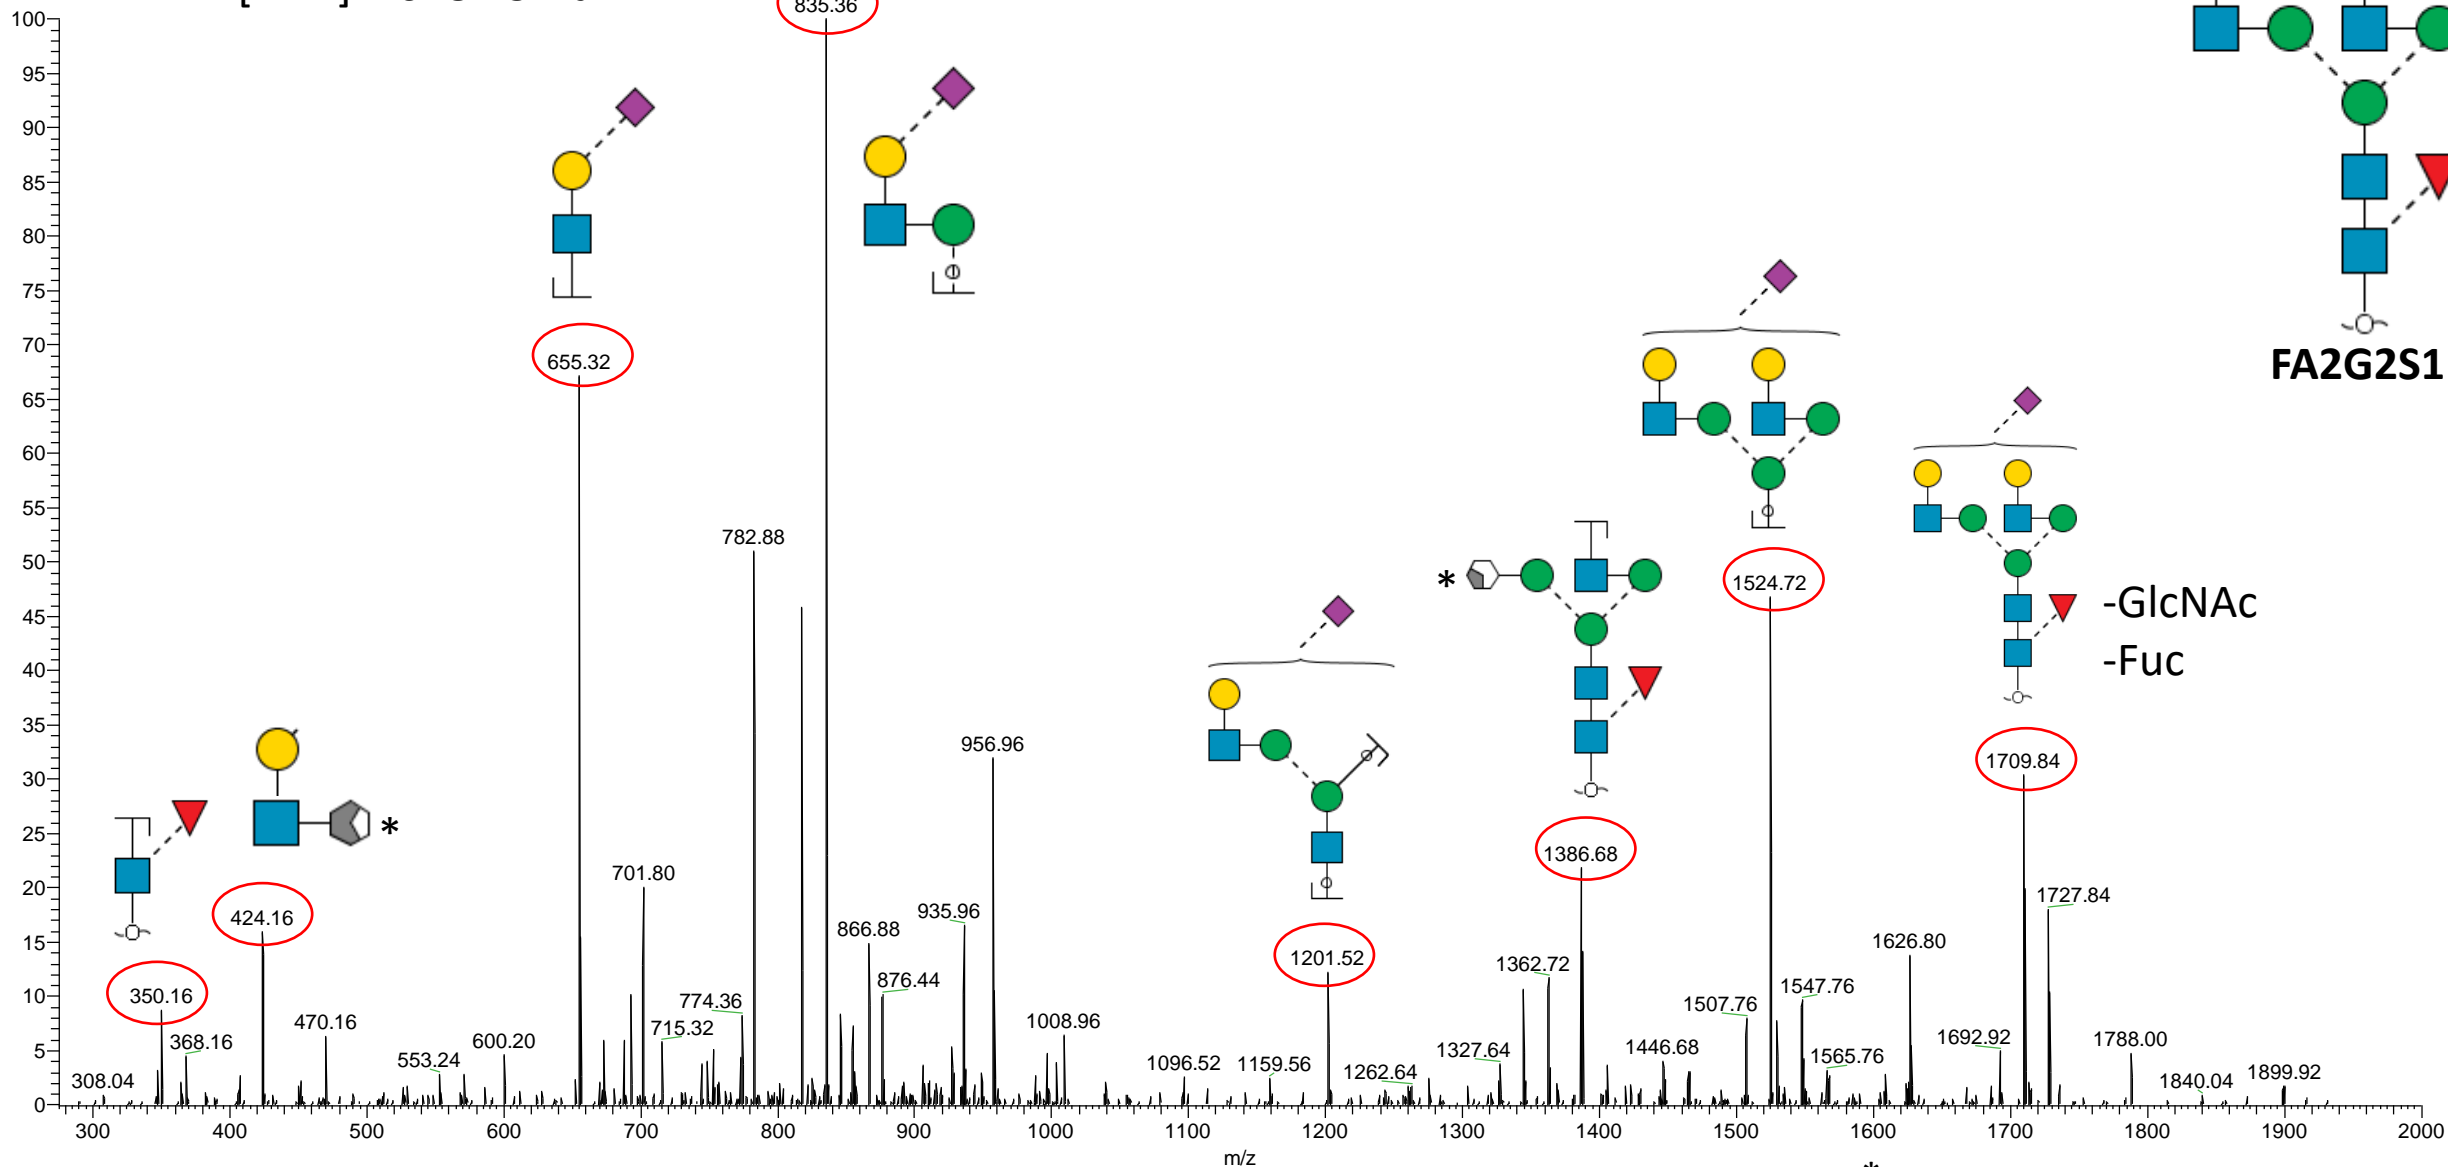

-GlcNAc  
-Fuc

\* Ambiguity in the cross-ring fragments

Note: This glycan has been annotated as the  $\alpha 2,6$ -/ $\alpha 2,6$ -sialyl isomer based on the early PGC-LC elution time.

### Glycan #22a

Observed  $m/z$  1184.52 (2-), RT:  $\sim 31.1$  min

$[M-H]^-$  2369.84 Da

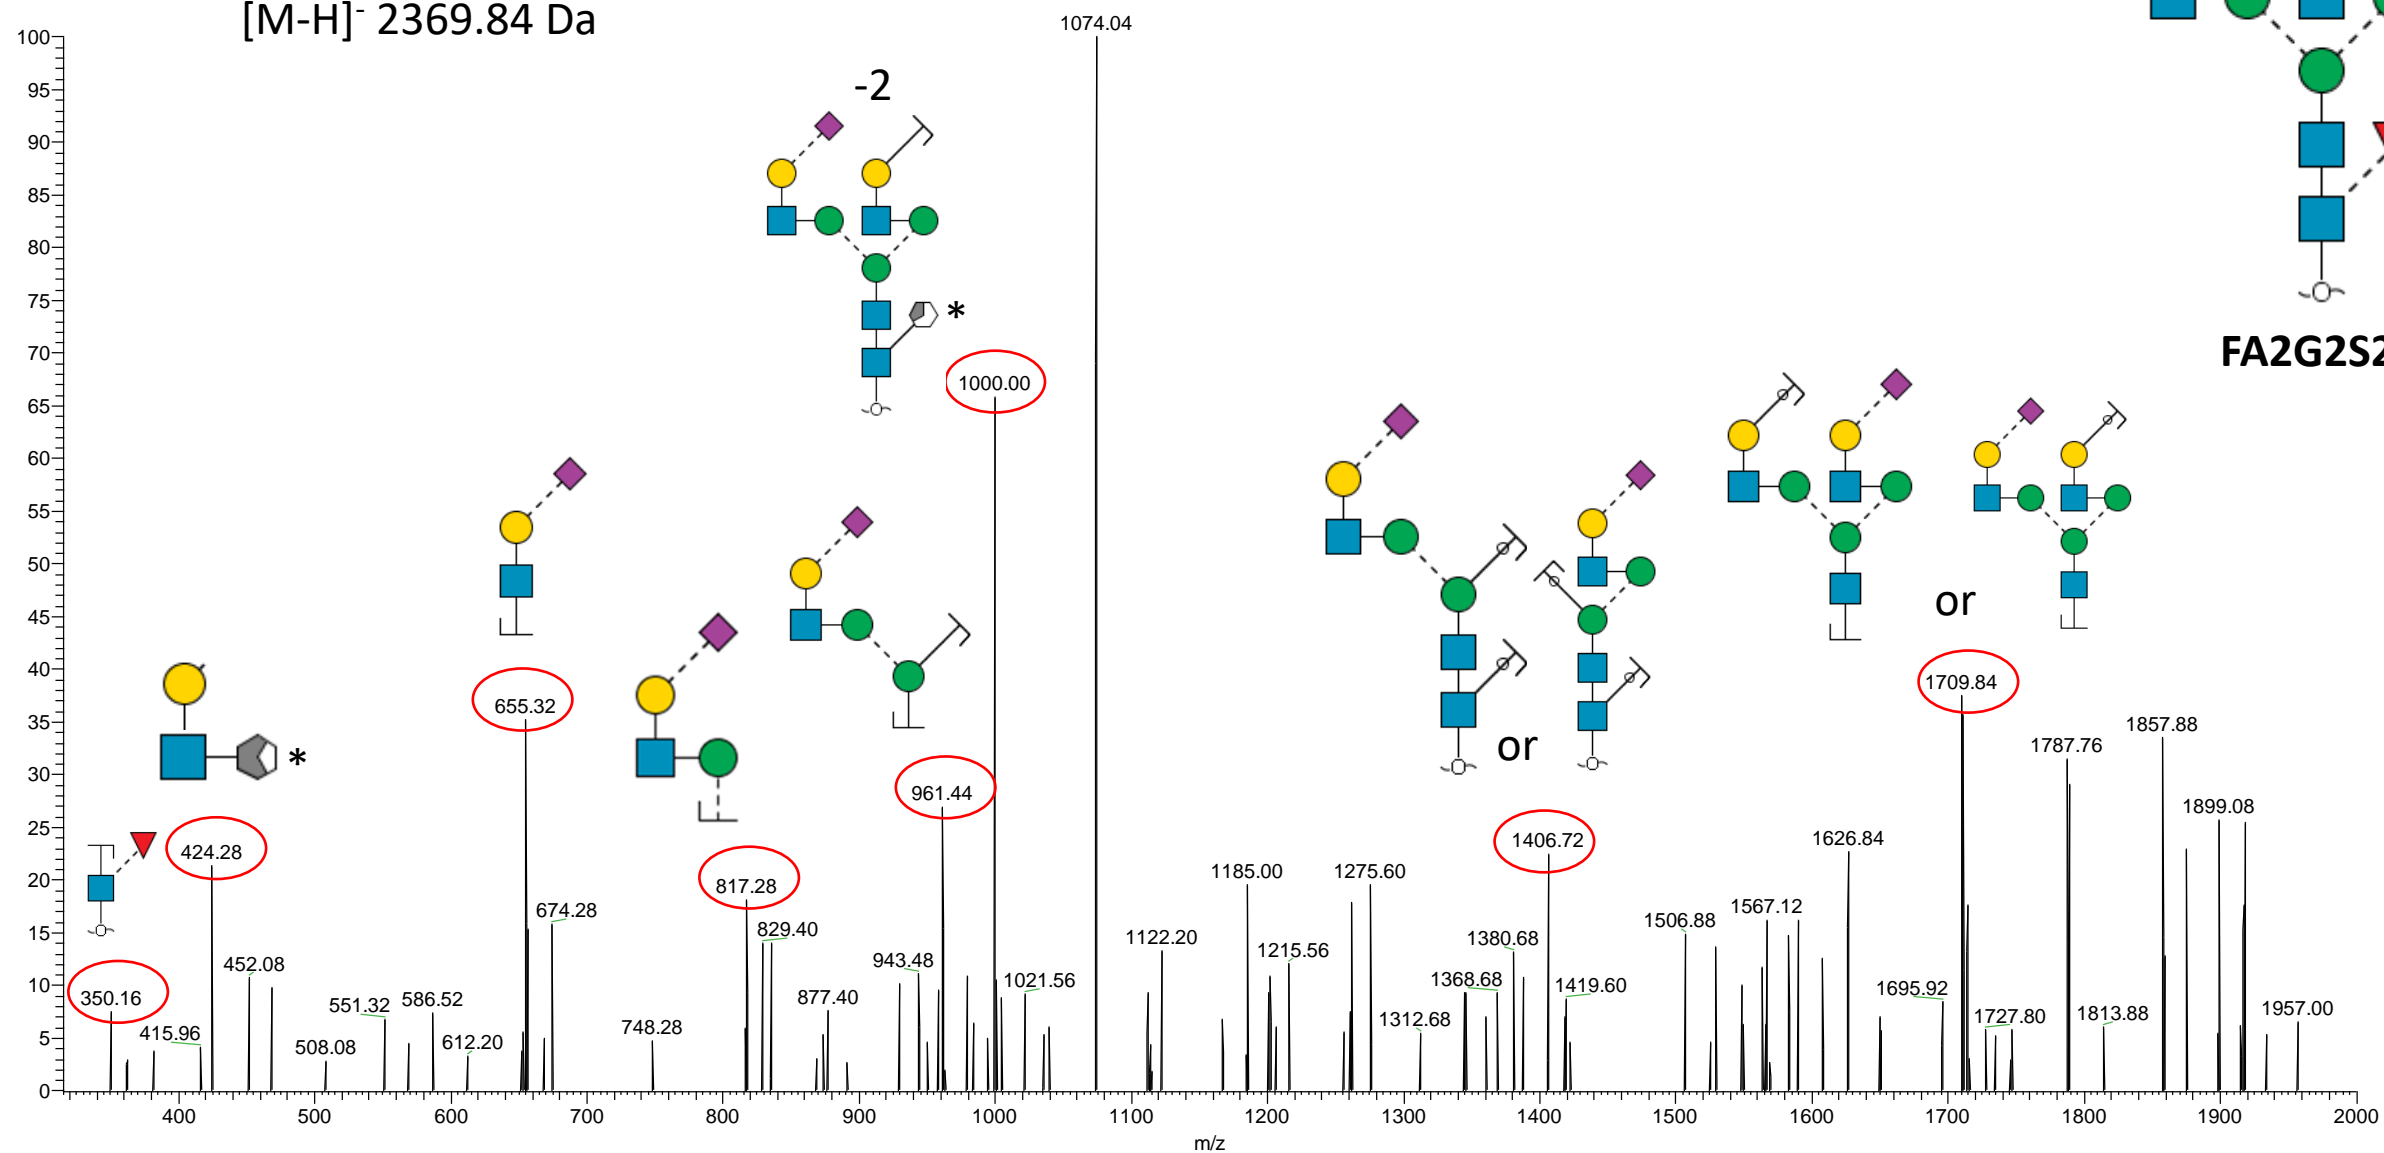

\* Ambiguity of the cross-ring fragments



# Glycan #22b

Note: This glycan has been annotated as the  $\alpha 2,6$ -/ $\alpha 2,3$ -sialyl isomer based on the late PGC-LC elution time (relative to Glycan #22a) and experience with neutrophil *N*-glycosylation. Not possible to position the  $\alpha 2,6$ - and  $\alpha 2,3$ -sialic acid to specific arms.

Observed  $m/z$  1184.52 (2-), RT:  $\sim 39.4$  min

$[M-H]^-$  2369.84 Da

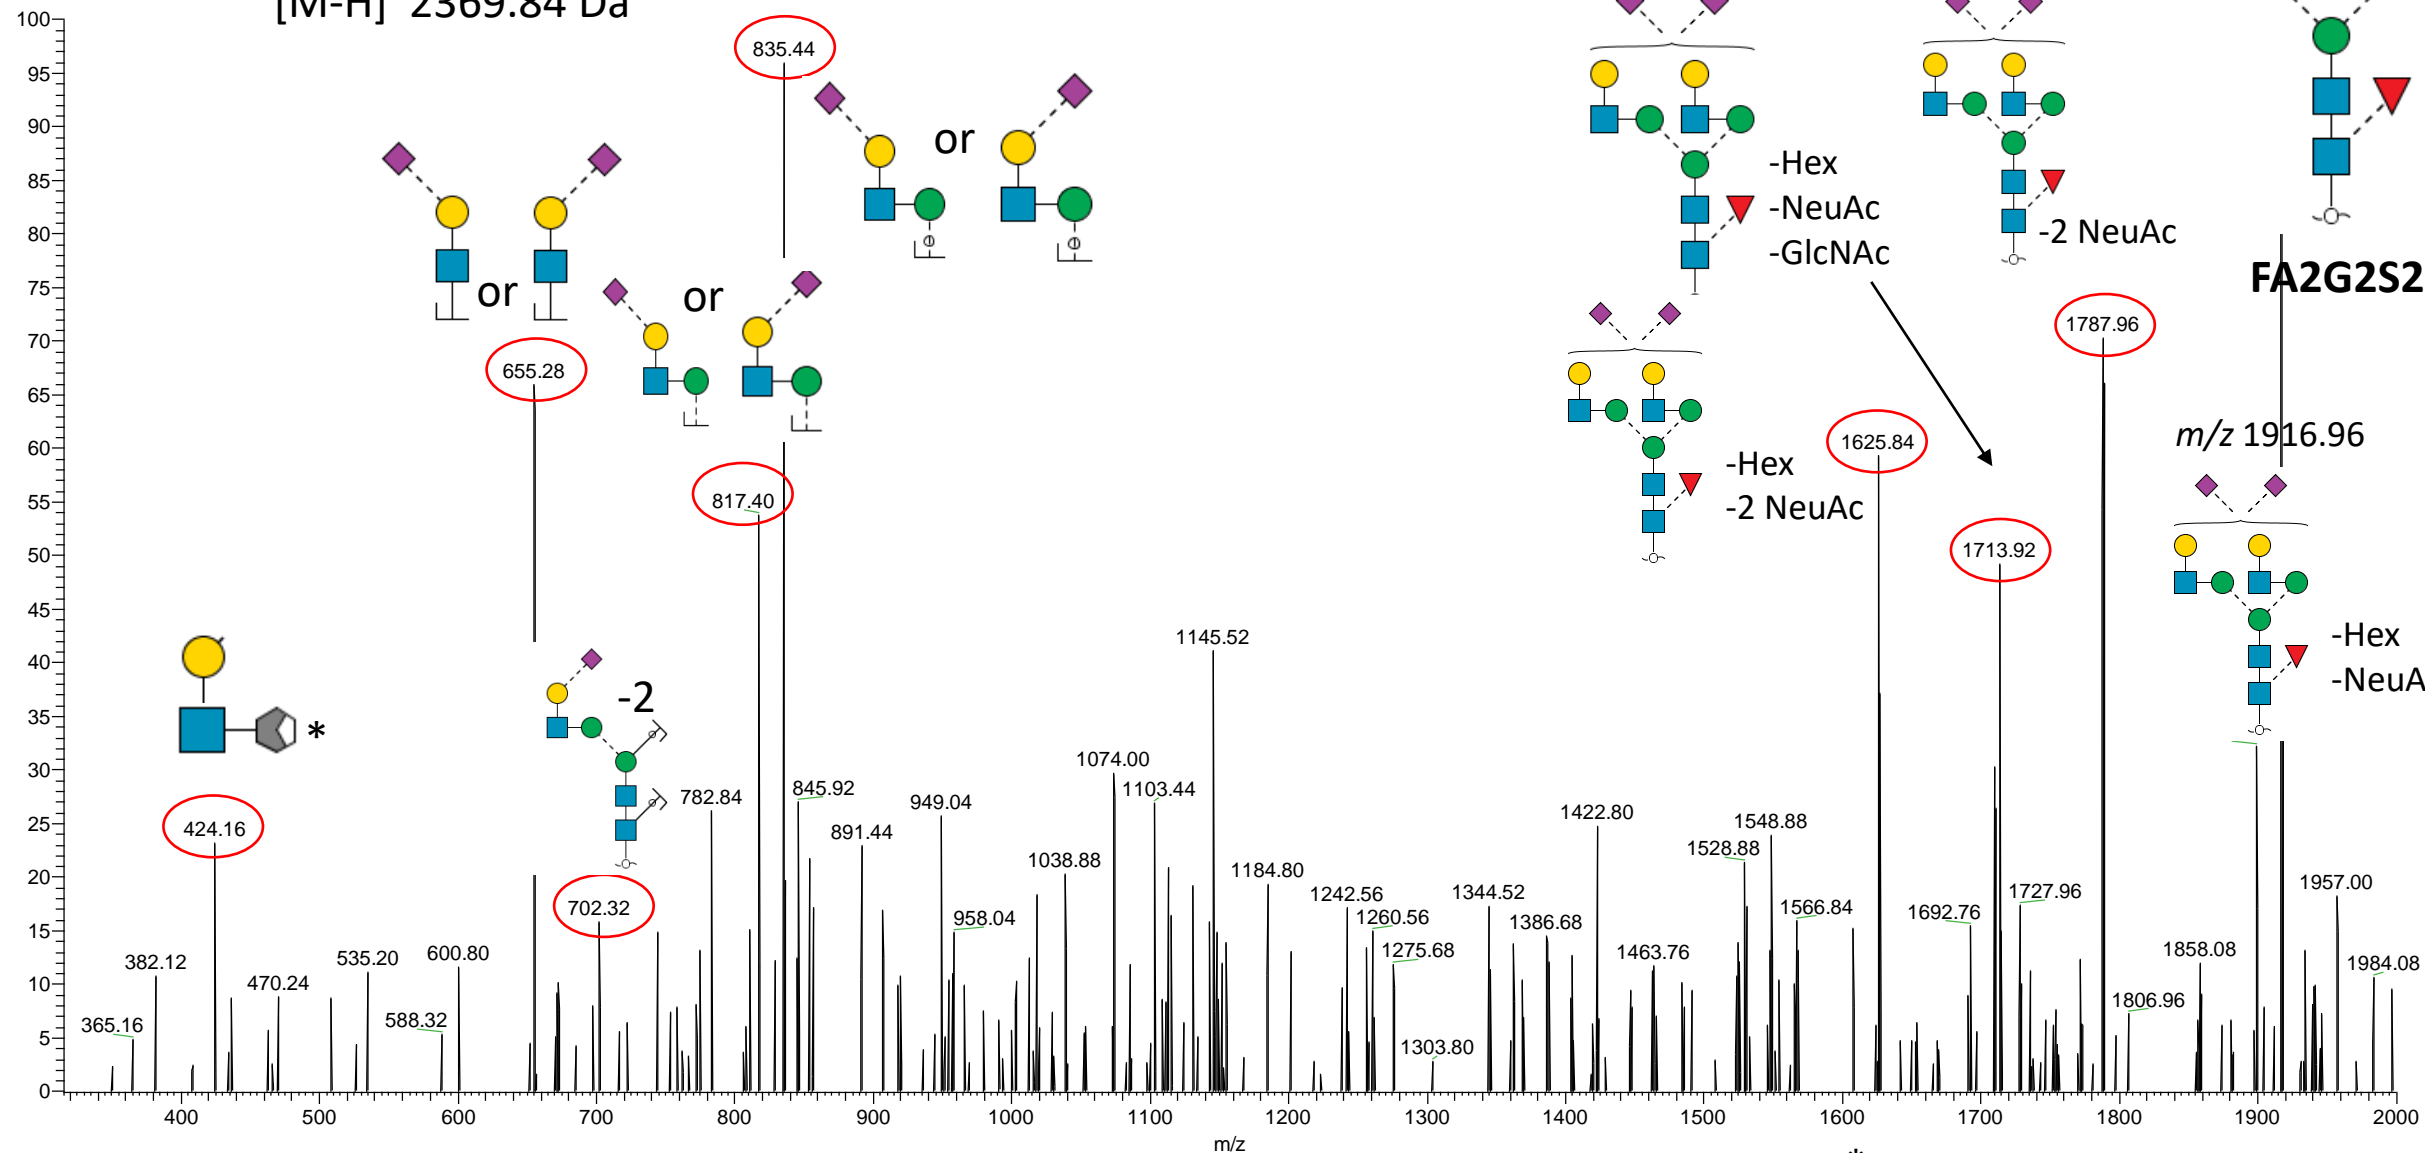

# Glycan #23

Observed  $m/z$  1111.91 (2-), RT: ~29.9 min  
[M-H]<sup>-</sup> 2224.82 Da

Note: No MS/MS evidence to support fucosyl-linkage type or the position of this outer arm residue, hence these features relating to the fucosyl moiety have been left unassigned. The sialyl-linkage can be predicted to be  $\alpha$ 2,6-sialyl from other characterised structures, but the arm position of this residue is unknown.

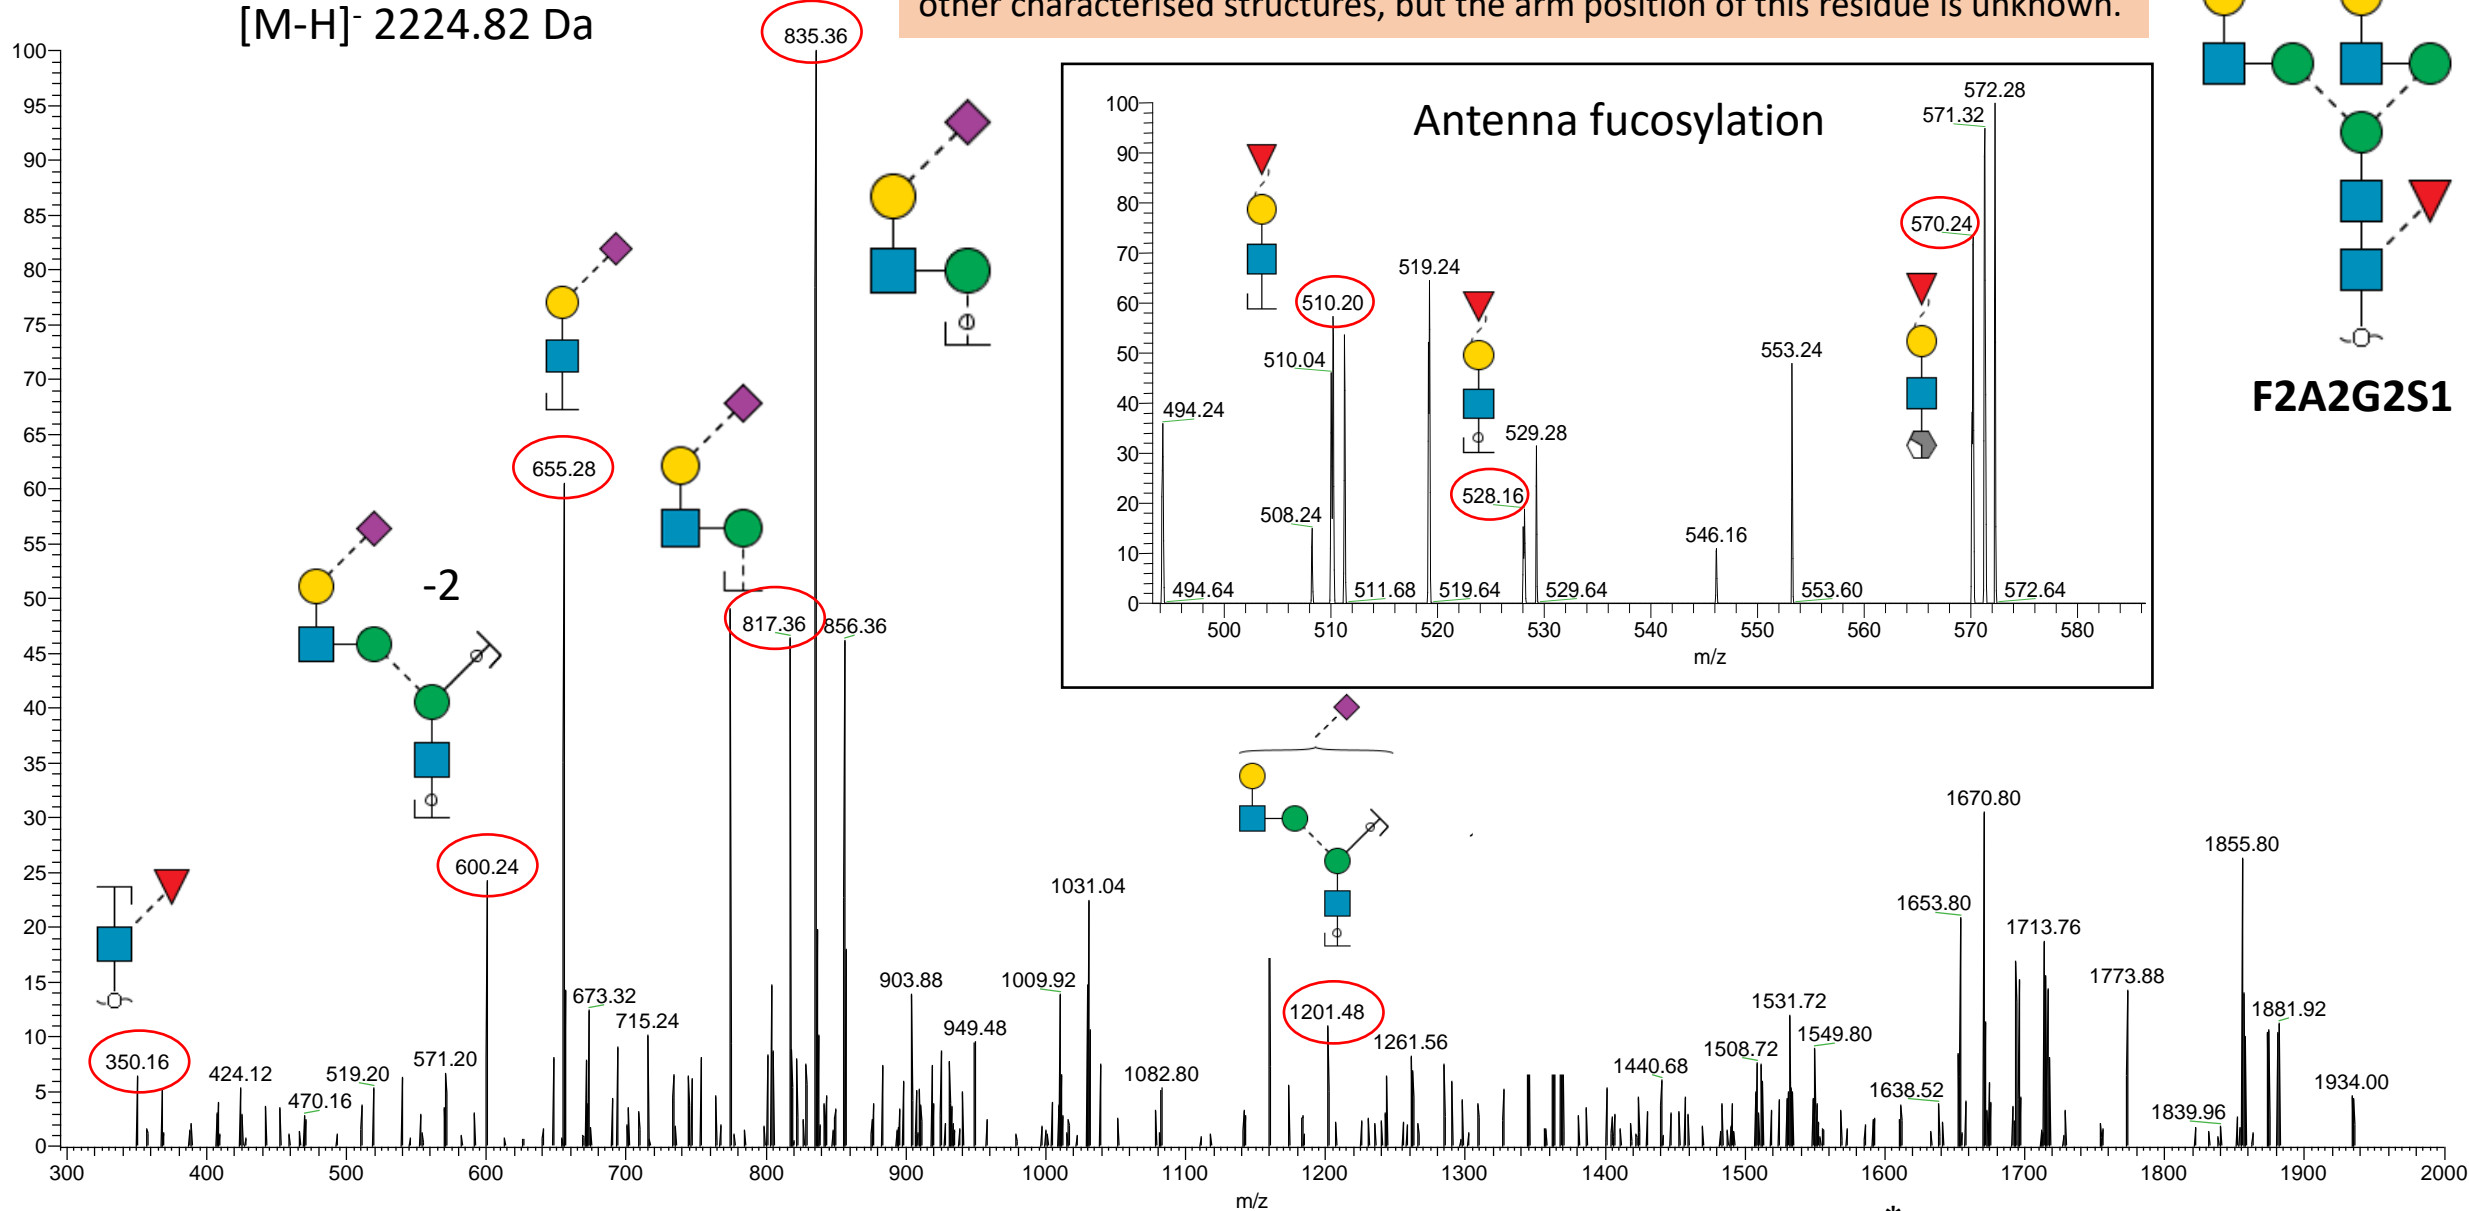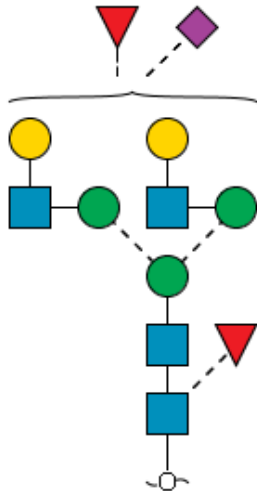

\* Ambiguity of the cross-ring fragments

## **Supplementary Data S2A**

Examples of Byonic-annotated reversed phase-LC-ESI-HCD-MS/MS (+) spectra of peptides identified with non-glyco PTMs (i.e. Met and Trp mono- and di-oxidation and Tyr mono-chlorination) from the analysis of unenriched peptide mixtures of nMPO

# Human myeloperoxidase (P05164)

## Mono-oxidised methionine-containing peptide

<sup>629</sup>KLMEQYGTPNNIDIWMGGVSEPLKR<sup>641</sup> (identification confidence level, PEP 2D:  $2.4 \times 10^{-20}$ )

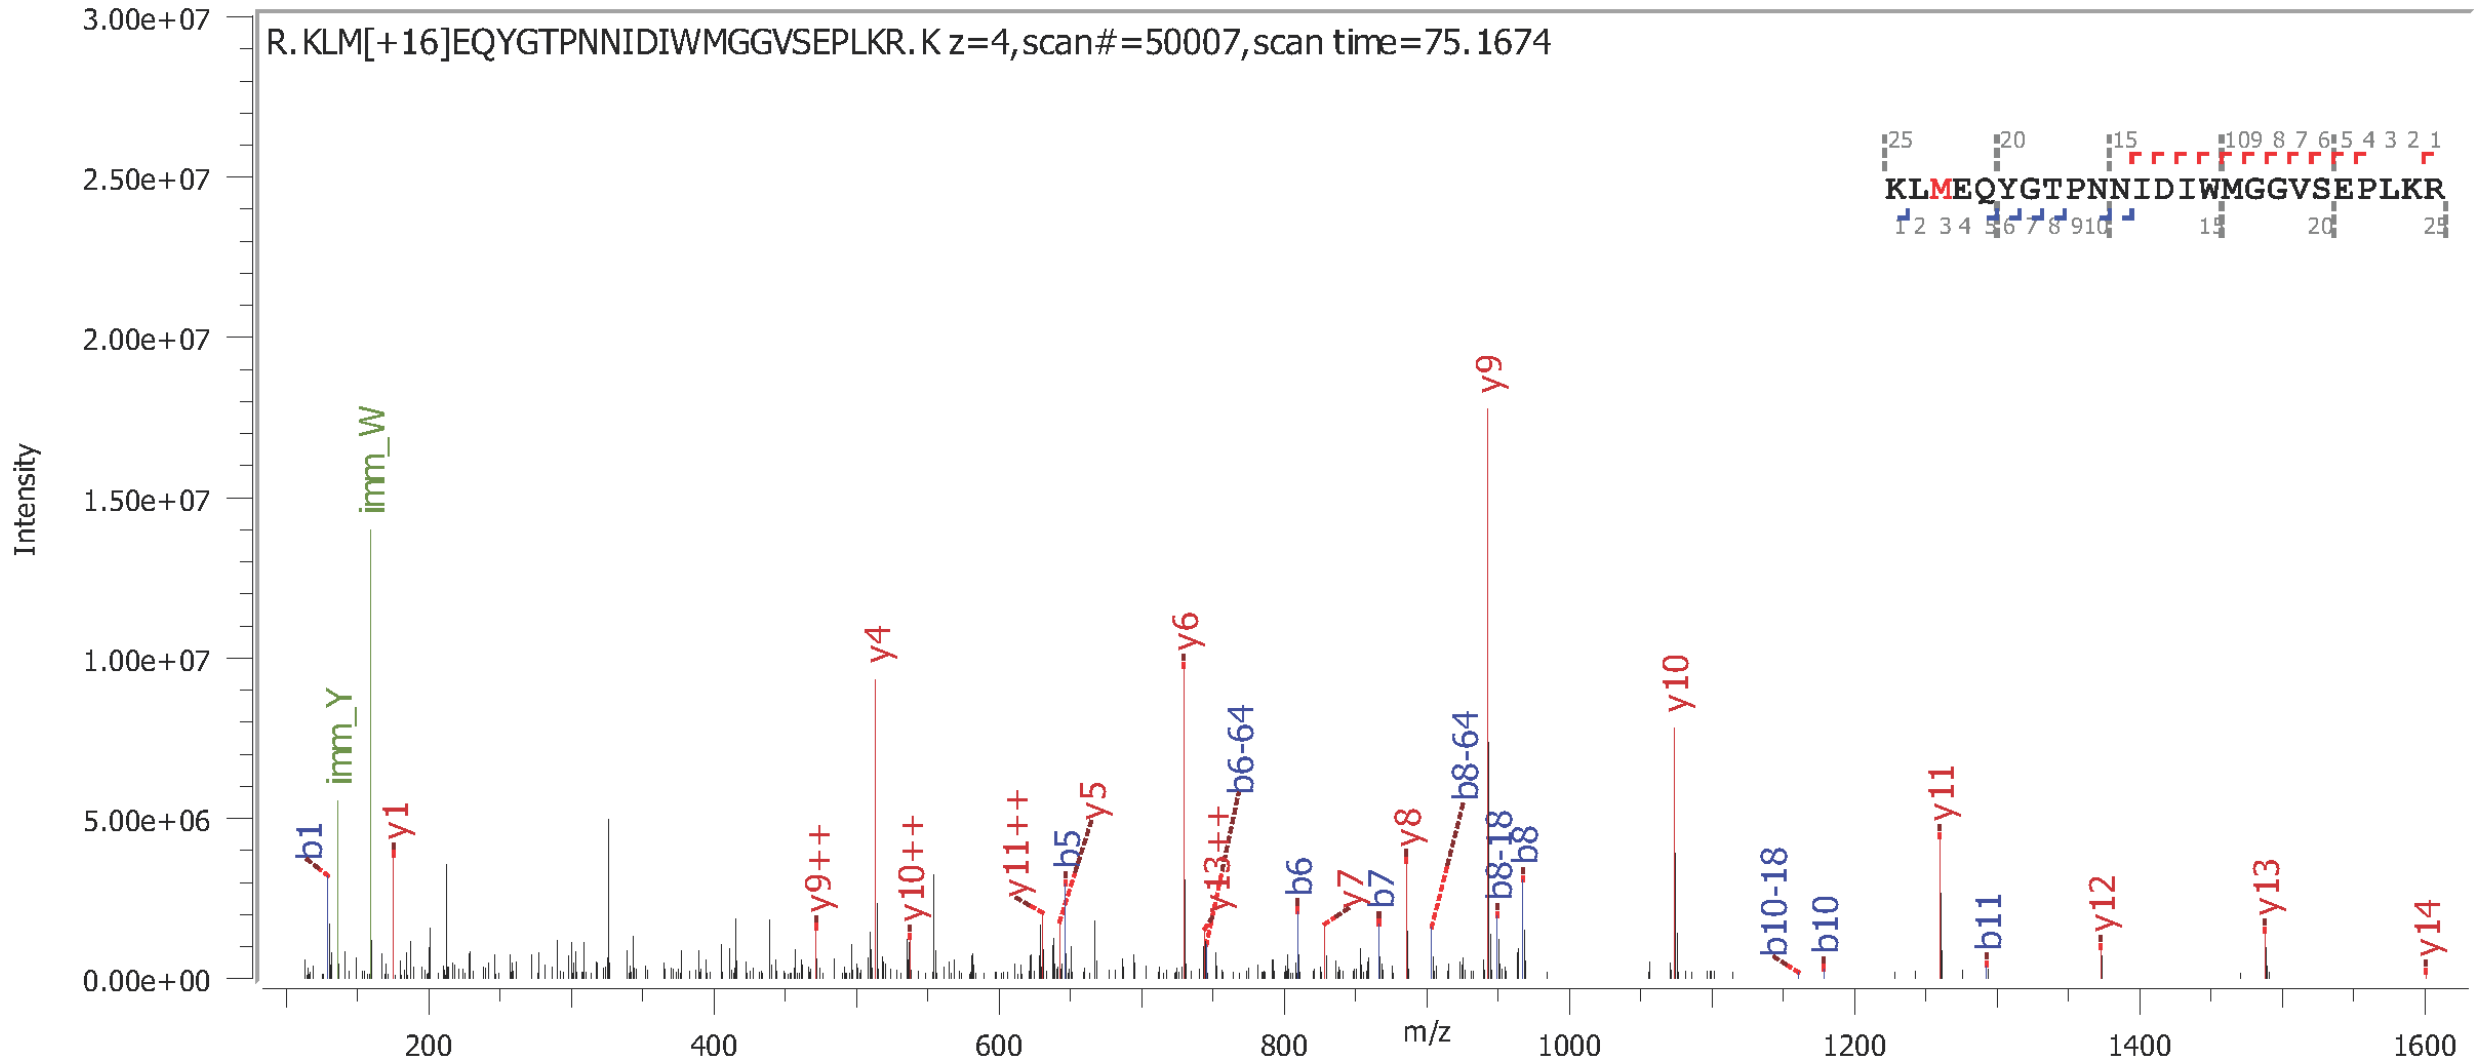

Human myeloperoxidase (P05164)

**Mono-oxidised tryptophan-containing peptide**

$^{198}\text{WLP AEYEDGFSLPYG}\underline{\text{W}}\text{TPGVKR}^{219}$  (identification confidence level, PEP 2D:  $1.9 \times 10^{-15}$ )

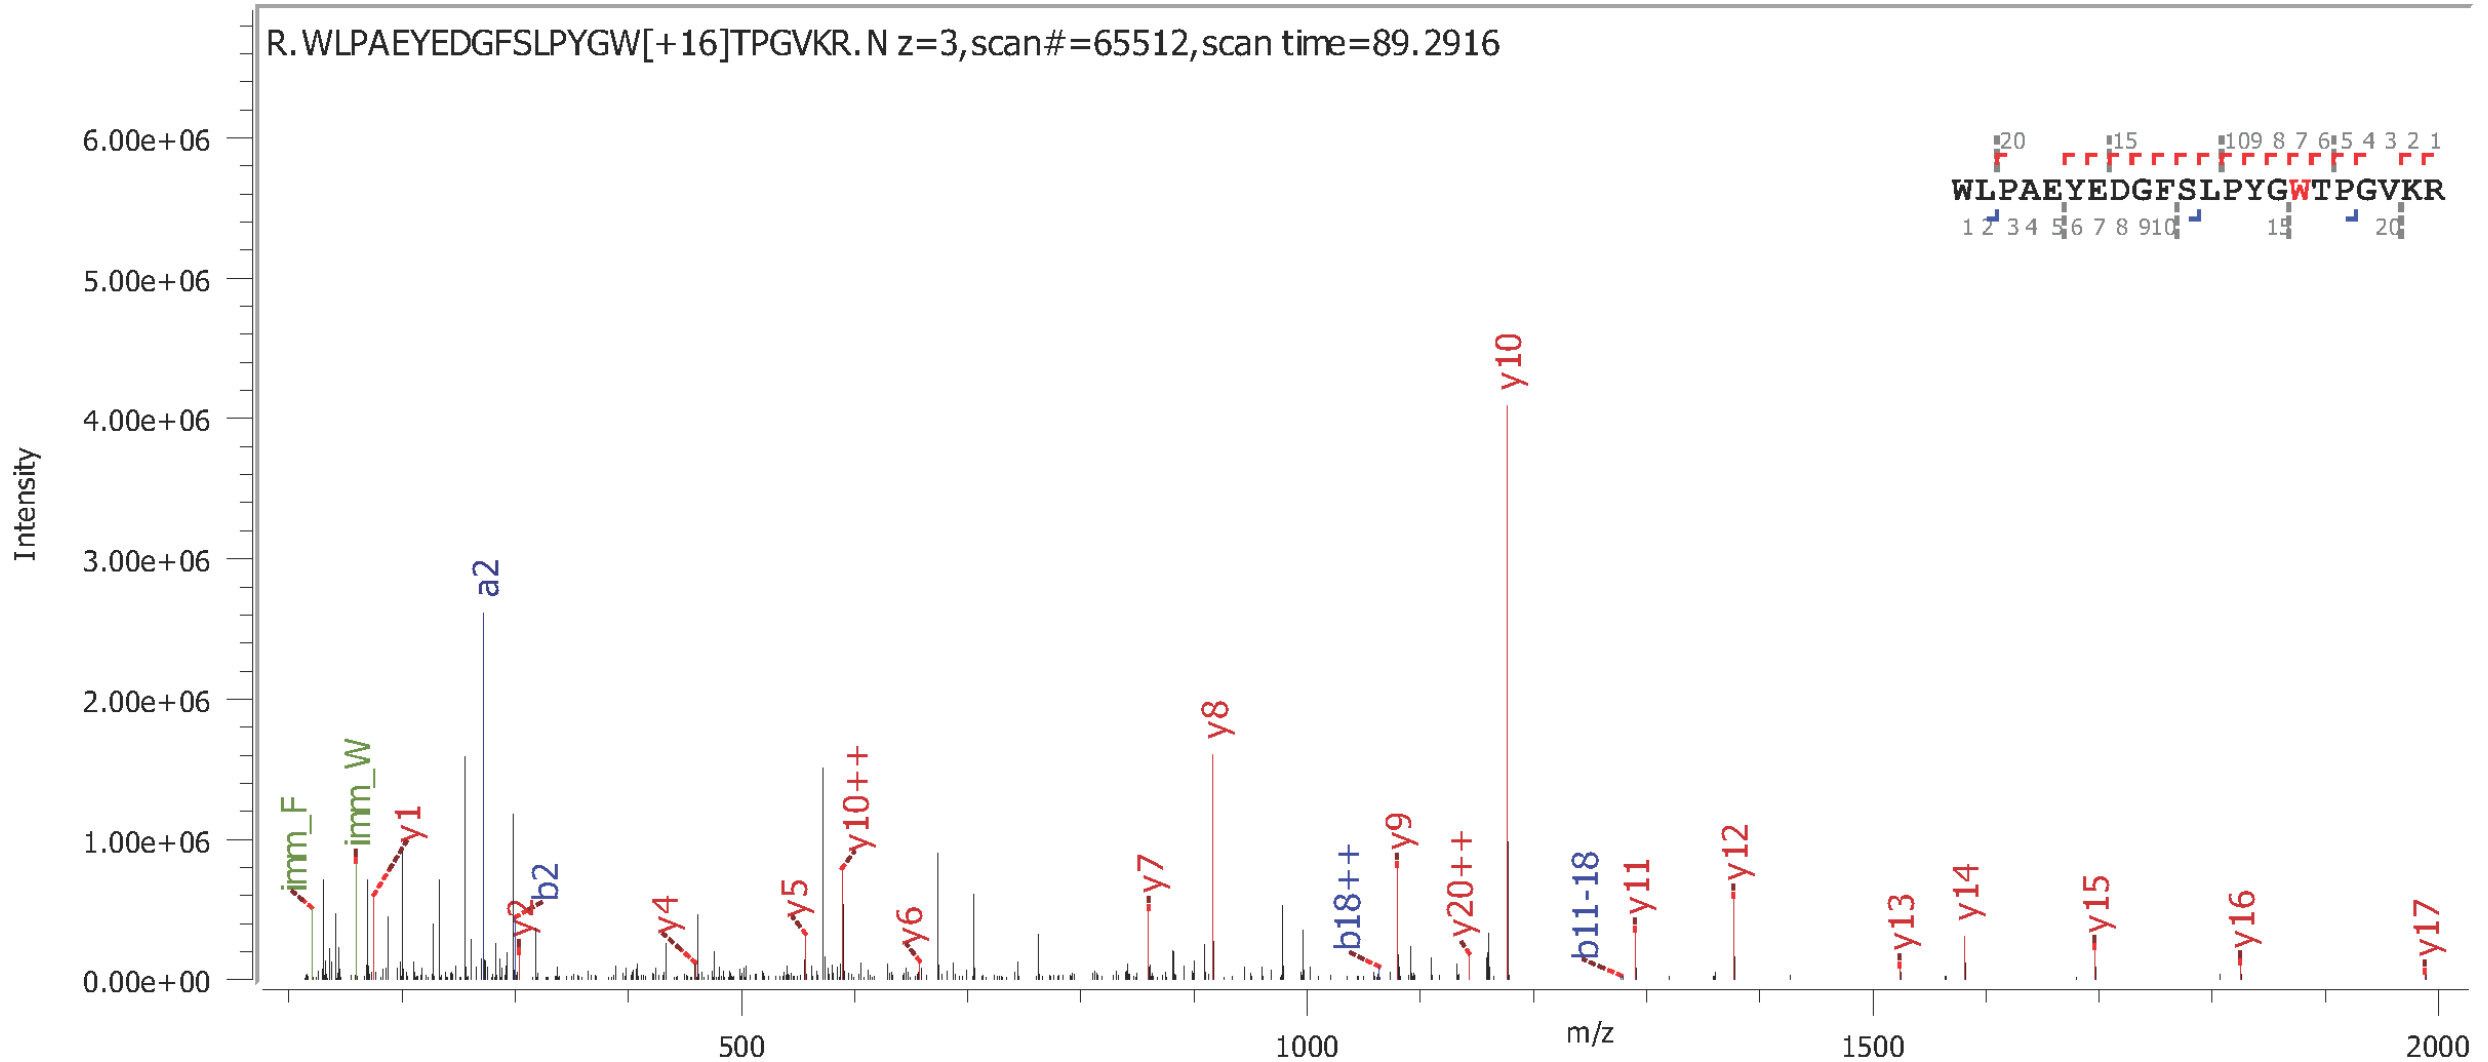

Human myeloperoxidase (P05164)

**Di-oxidised tryptophan-containing peptide**

<sup>629</sup>KLMEQYGTPNNIDIWMGGVSEPLKR<sup>641</sup> (identification confidence level, PEP 2D: 1.9x10<sup>-18</sup>)

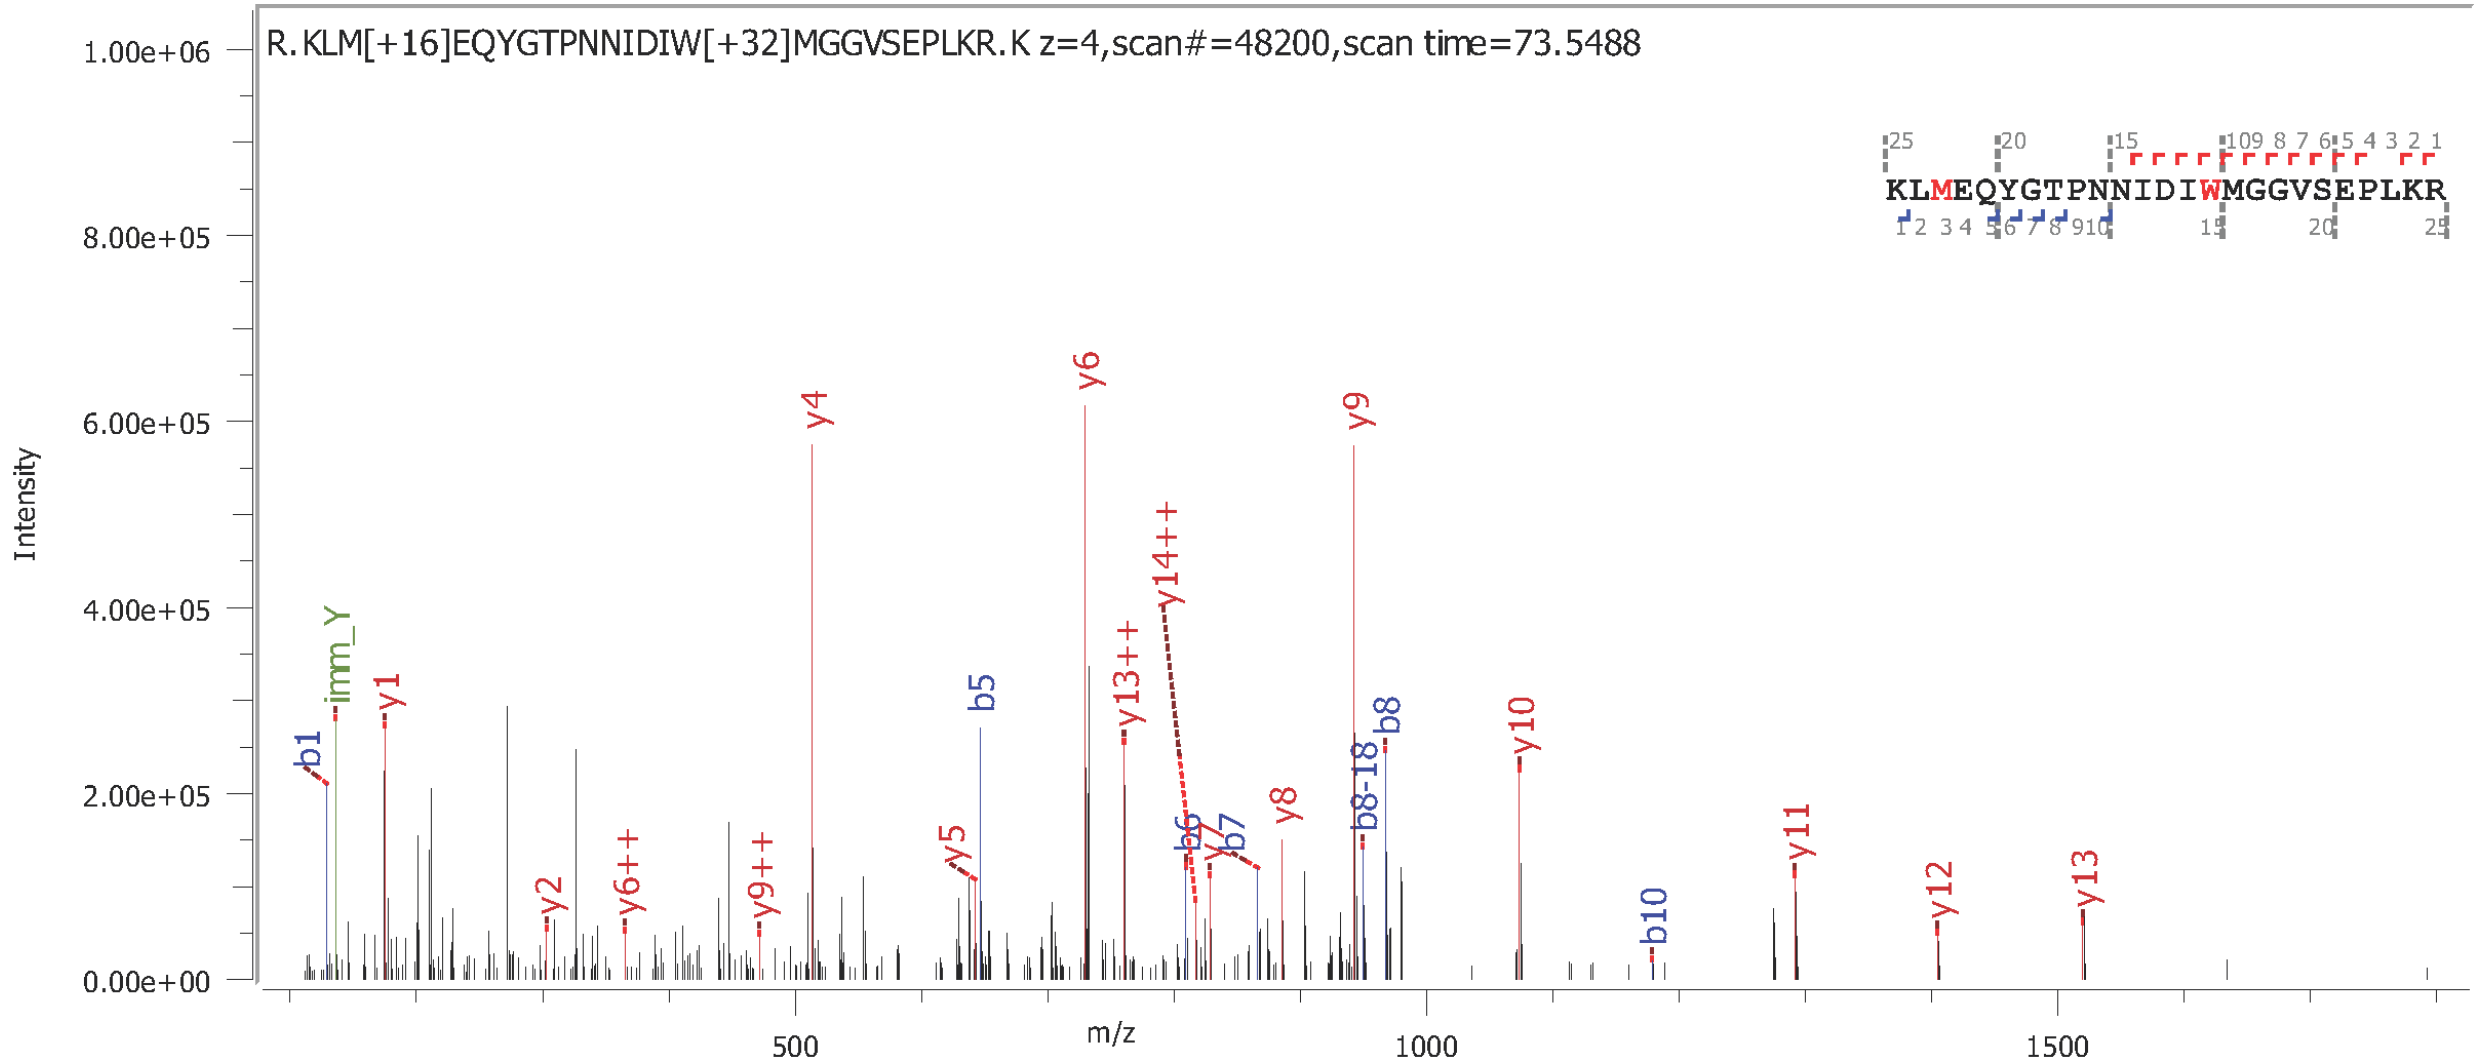

# Human myeloperoxidase (P05164)

## Mono-chlorinated tyrosine-containing peptide

$^{715}$ NNIFMSNS**Y**PRDFVNCSTLPALNLSWR $^{742}$  (identification confidence level, PEP 2D:  $3.3 \times 10^{-8}$ )

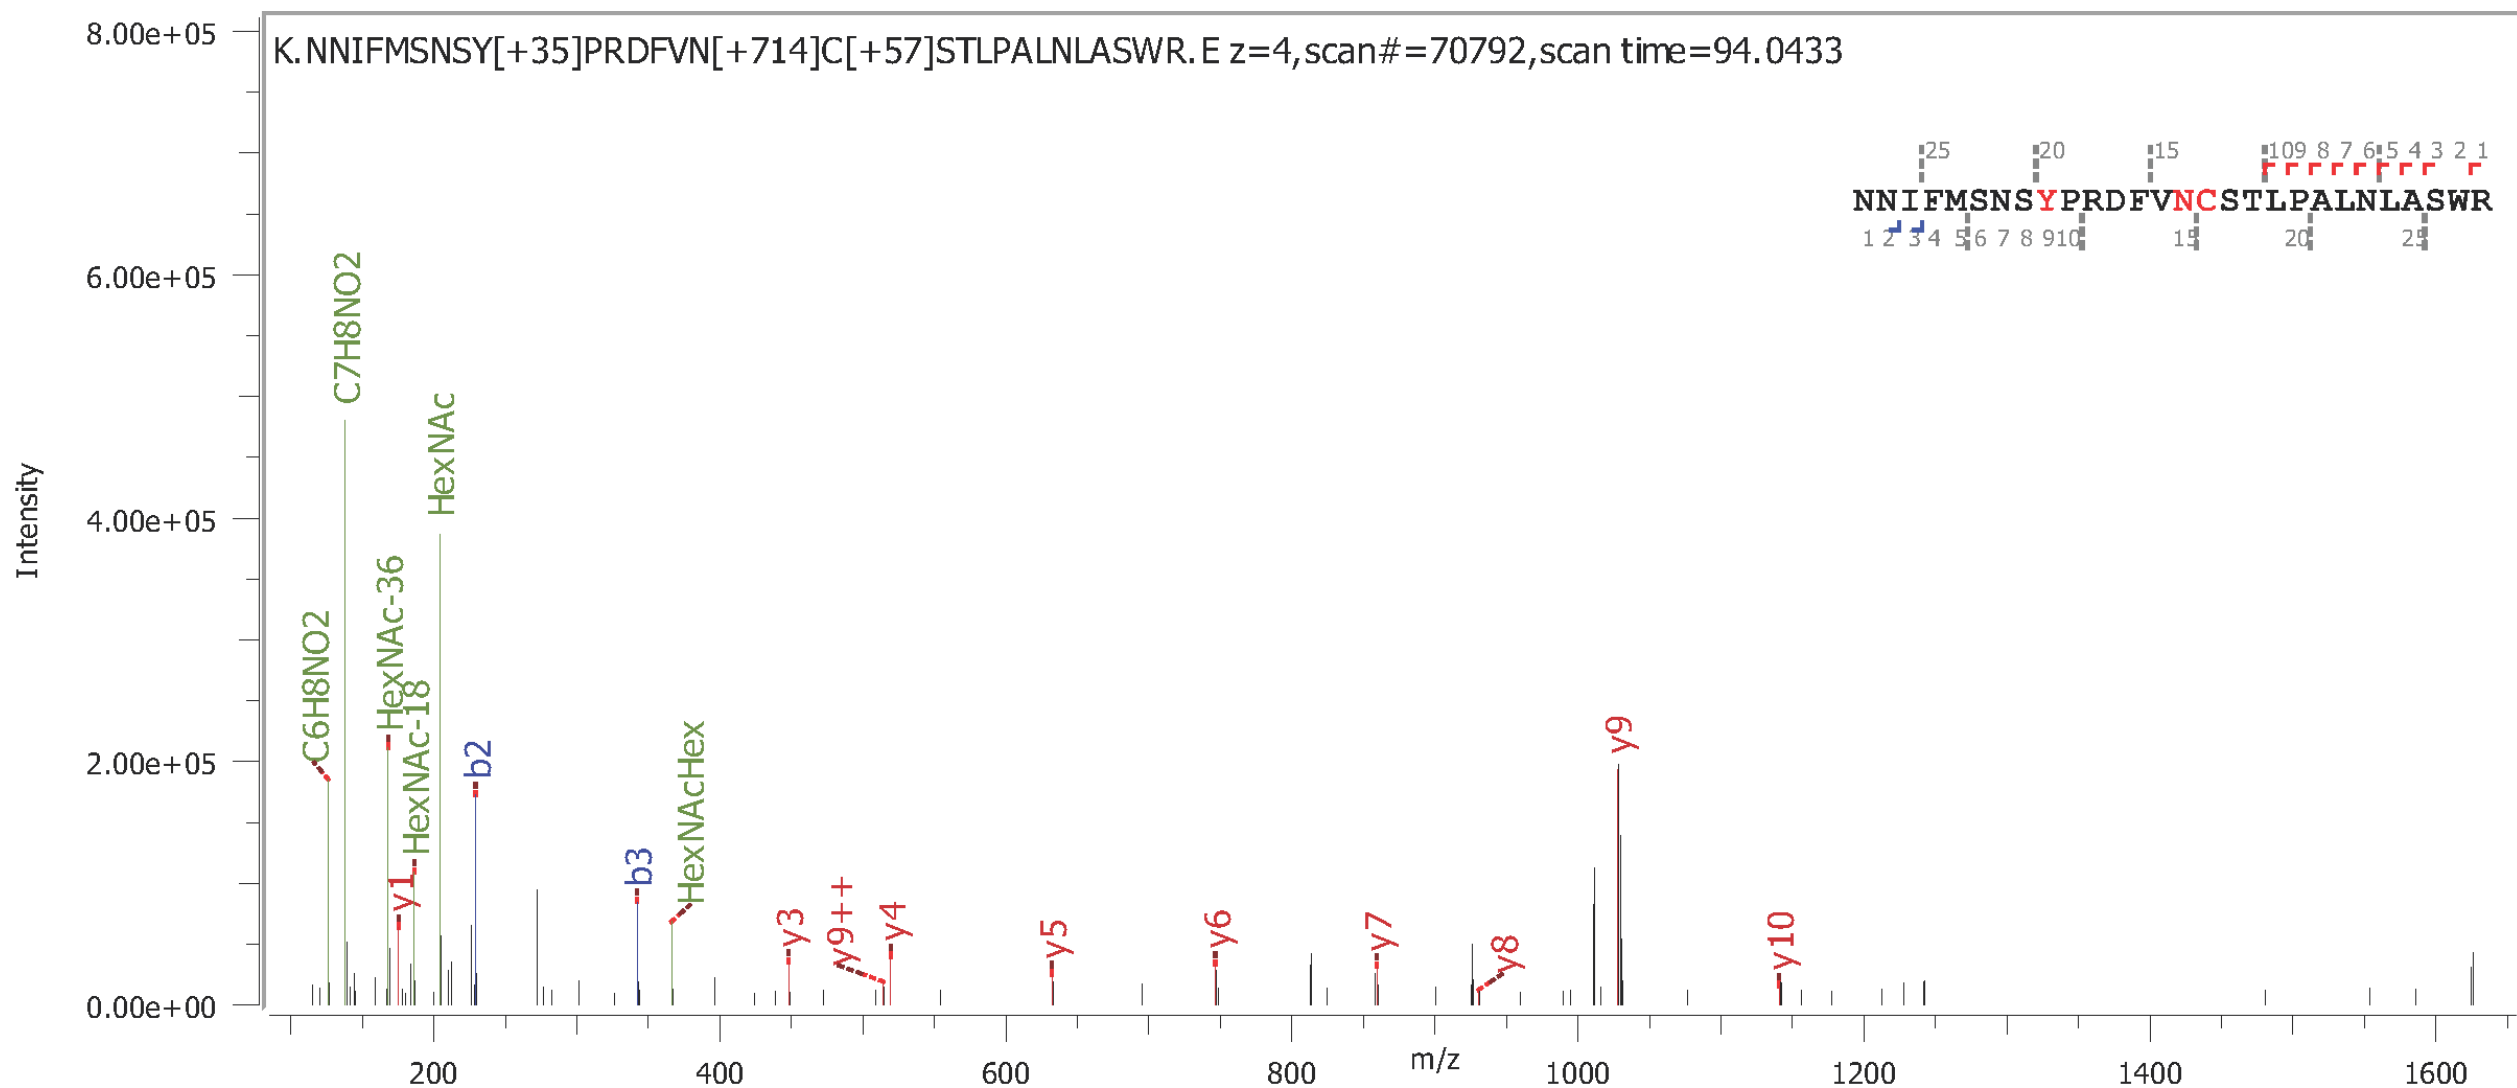

## **Supplementary Data S2B**

Byonic-annotated reversed phase-LC-ESI-HCD-MS/MS (+) spectra of N- and C-terminal truncation variants of the MPO  $\alpha$ - and  $\beta$ -chain identified from the analysis of unenriched peptide mixtures of nMPO



Human myeloperoxidase (P05164)

**α-chain N-terminal** (truncation variant)

**<sup>164</sup>G**VTCPEQDKYR (identification confidence level, PEP 2D: 4.0x10<sup>-11</sup>)

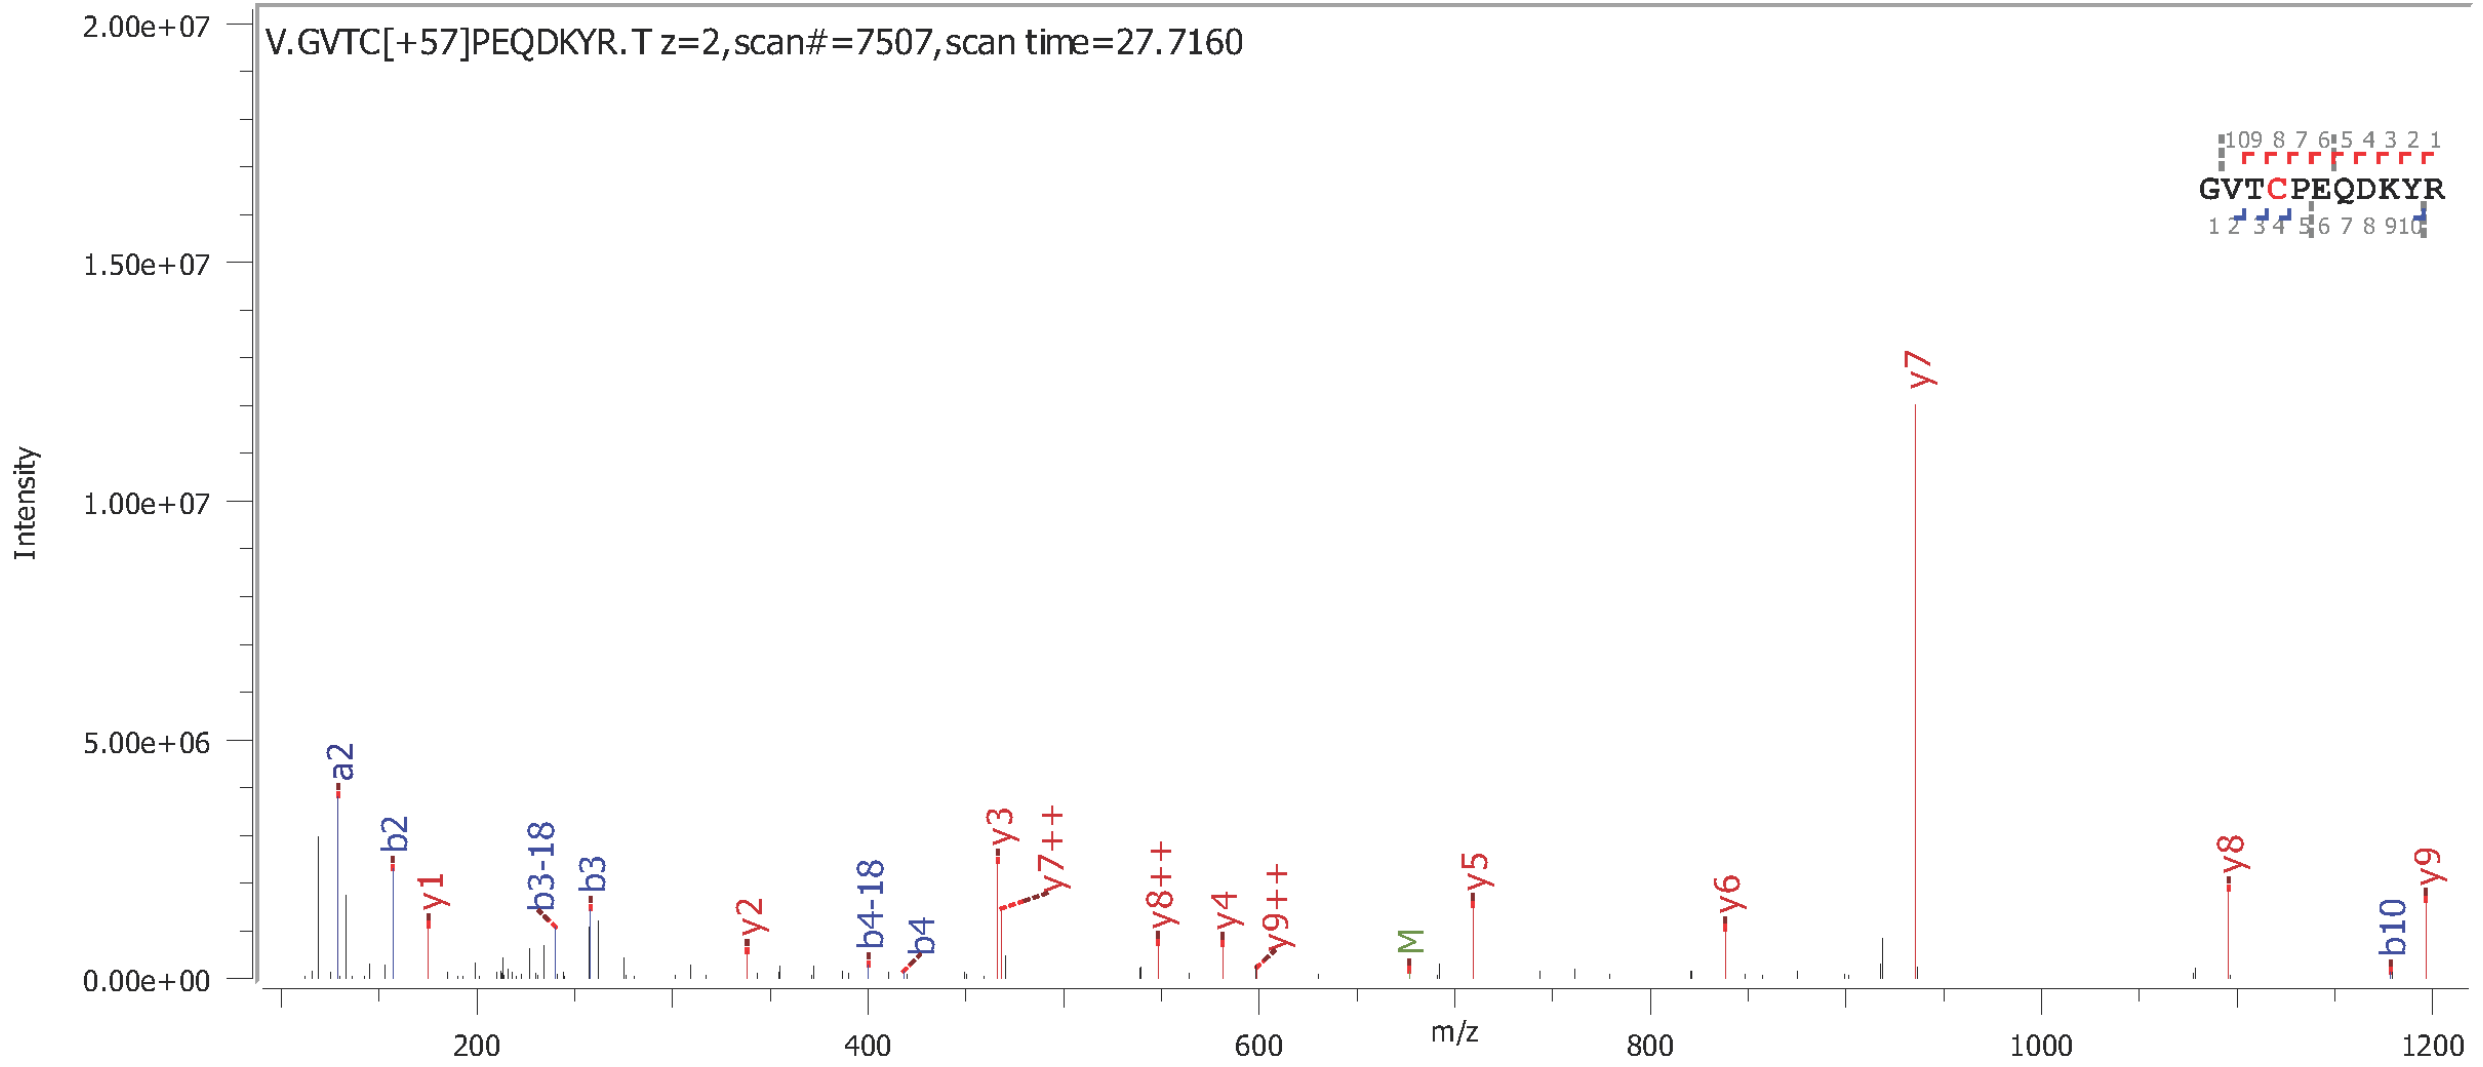

Human myeloperoxidase (P05164)

**α-chain N-terminal** (truncation variant)

<sup>165</sup>VTCPEQDKYR (identification confidence level, PEP 2D: 5.7 x 10<sup>-7</sup>)

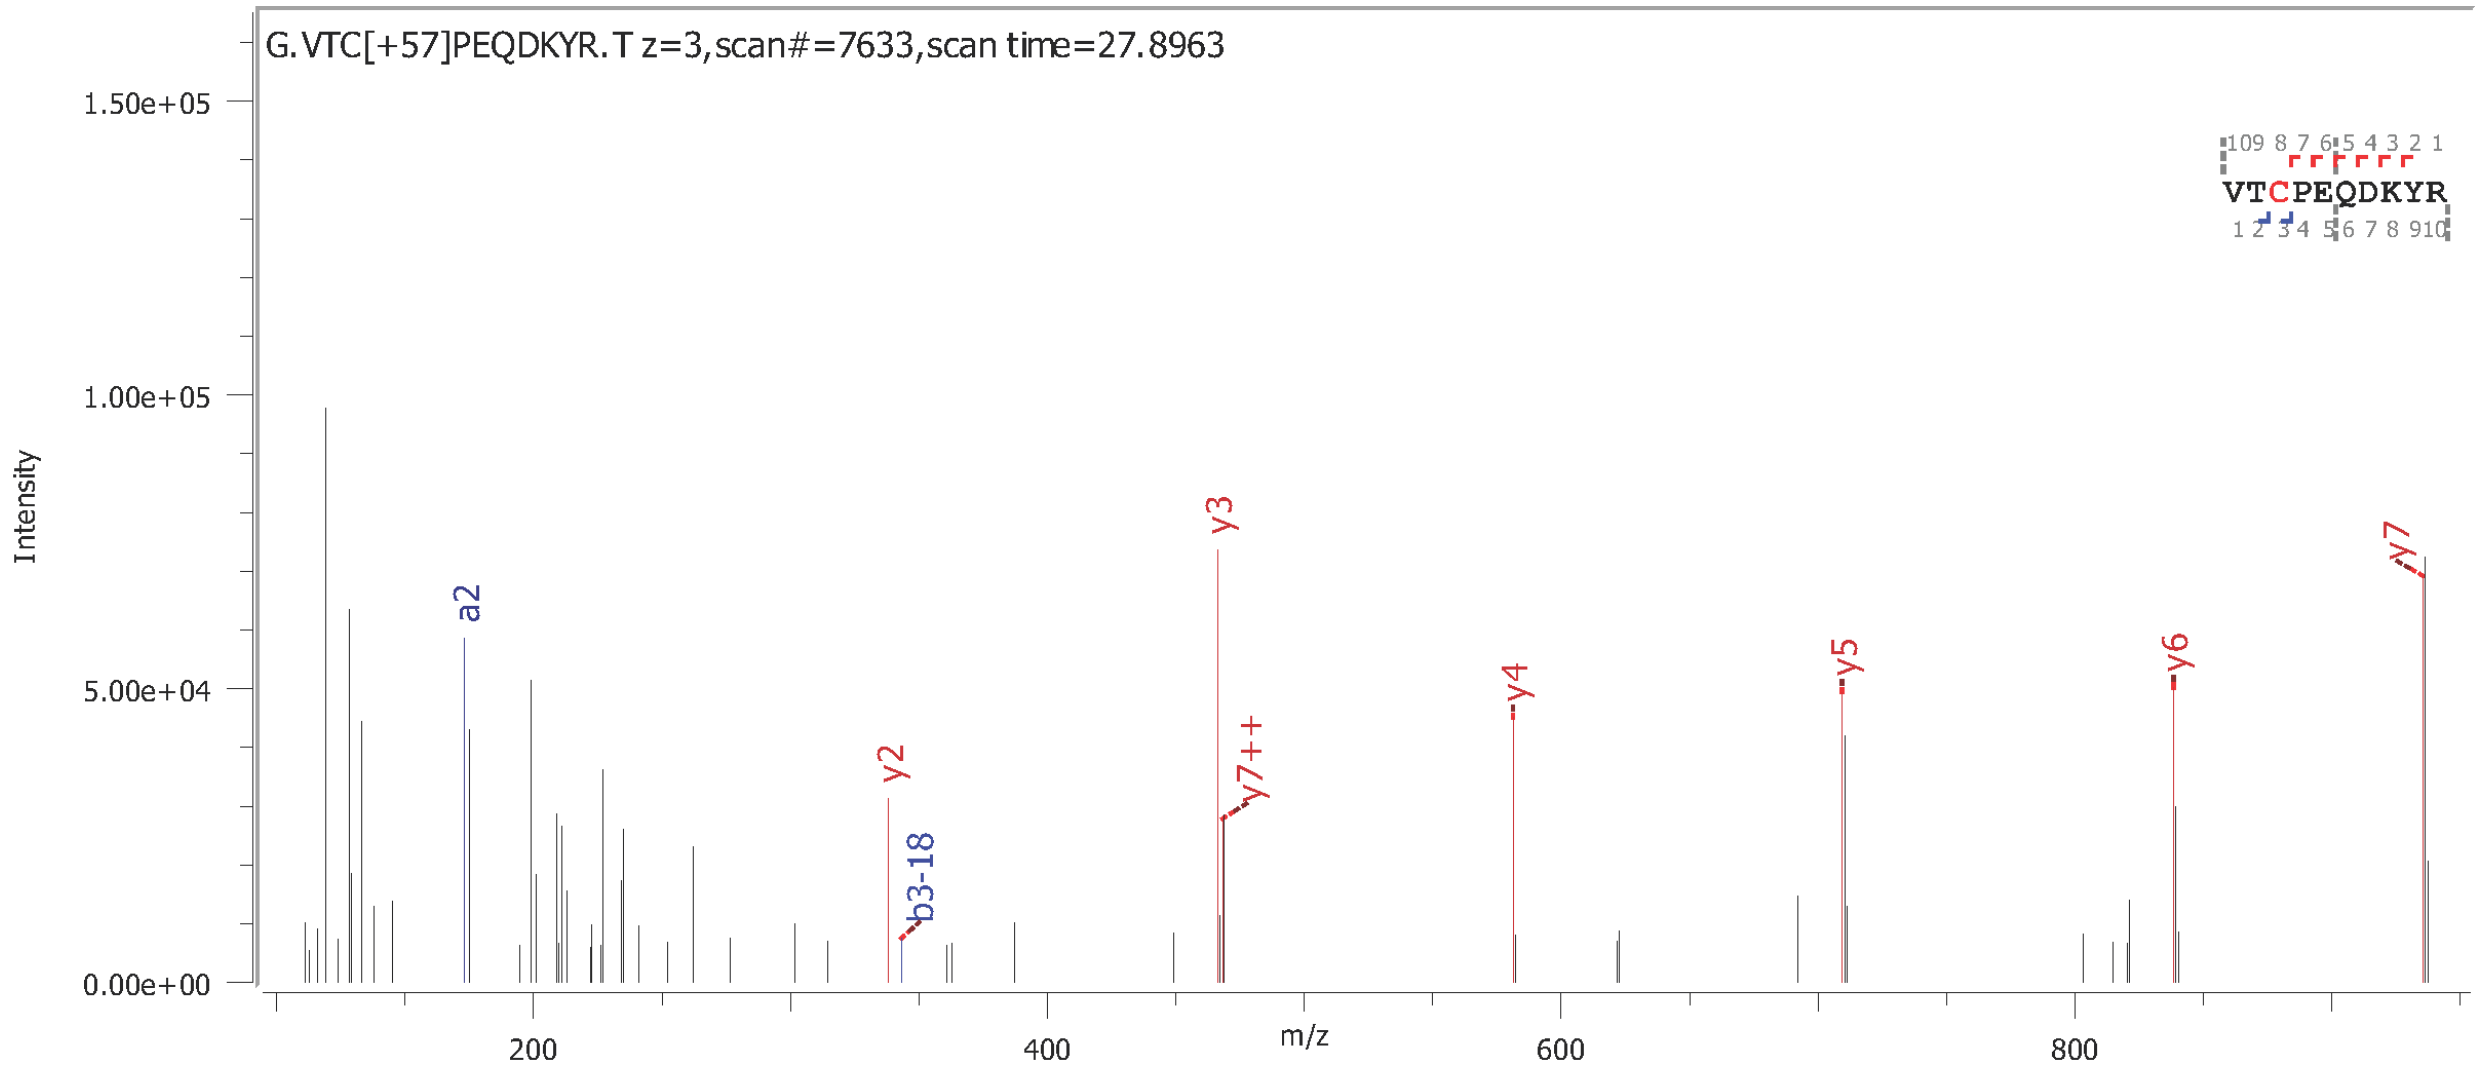

# Human myeloperoxidase (P05164)

## $\alpha$ -chain N-terminal (truncation variant)

<sup>166</sup>TCP<sup>166</sup>EQDKYR (identification confidence level, PEP 2D:  $3.3 \times 10^{-8}$ )

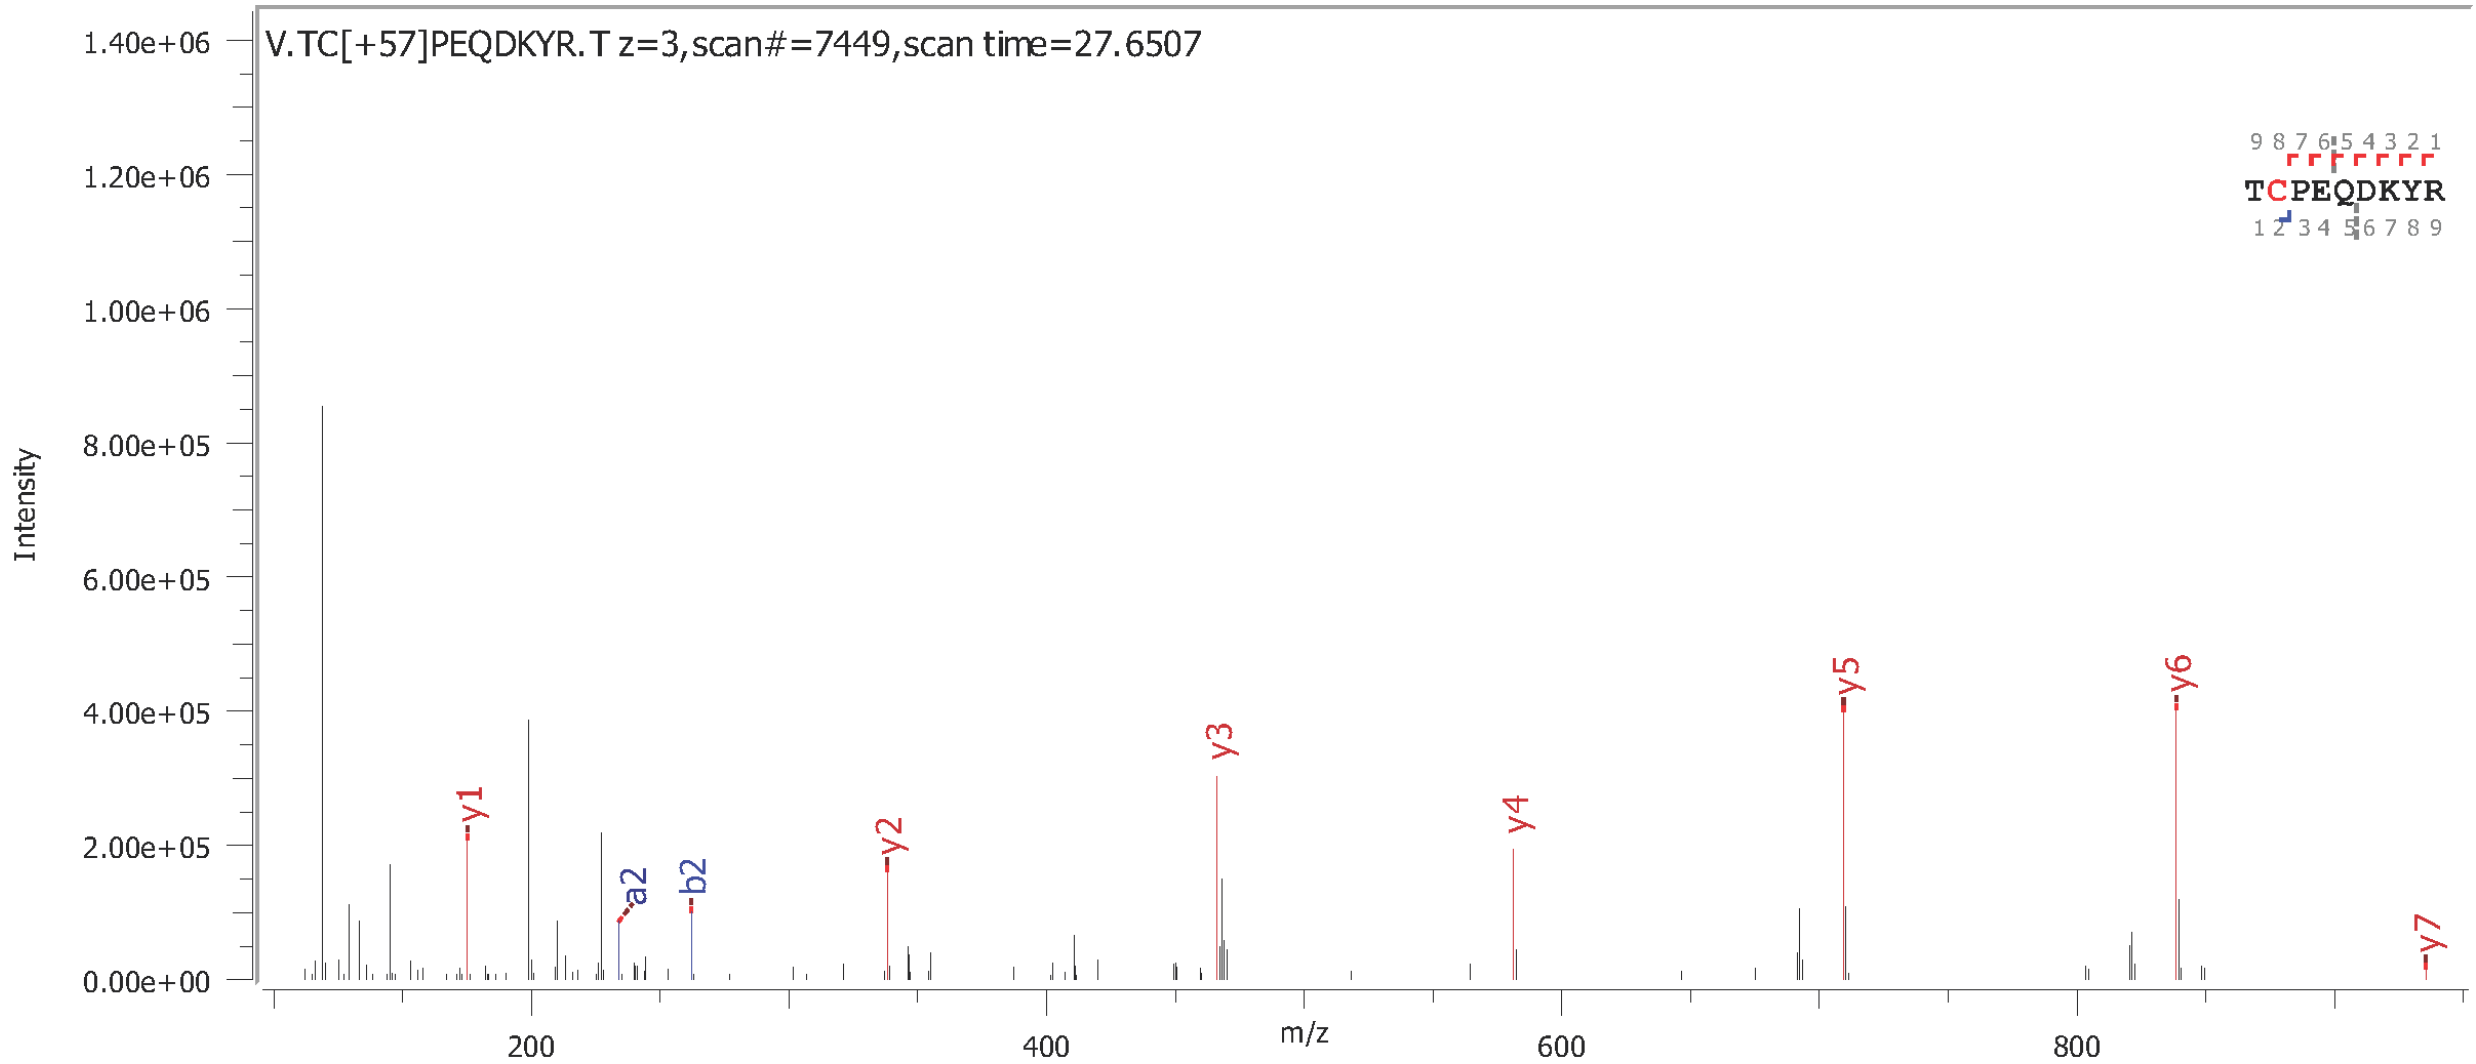

# Human myeloperoxidase (P05164)

## $\alpha$ -chain N-terminal (truncation variant)

SLMFMQWGQLLDHLDFTPEPAAR<sup>R272</sup> (identification confidence level, PEP 2D:  $1.9 \times 10^{-23}$ )

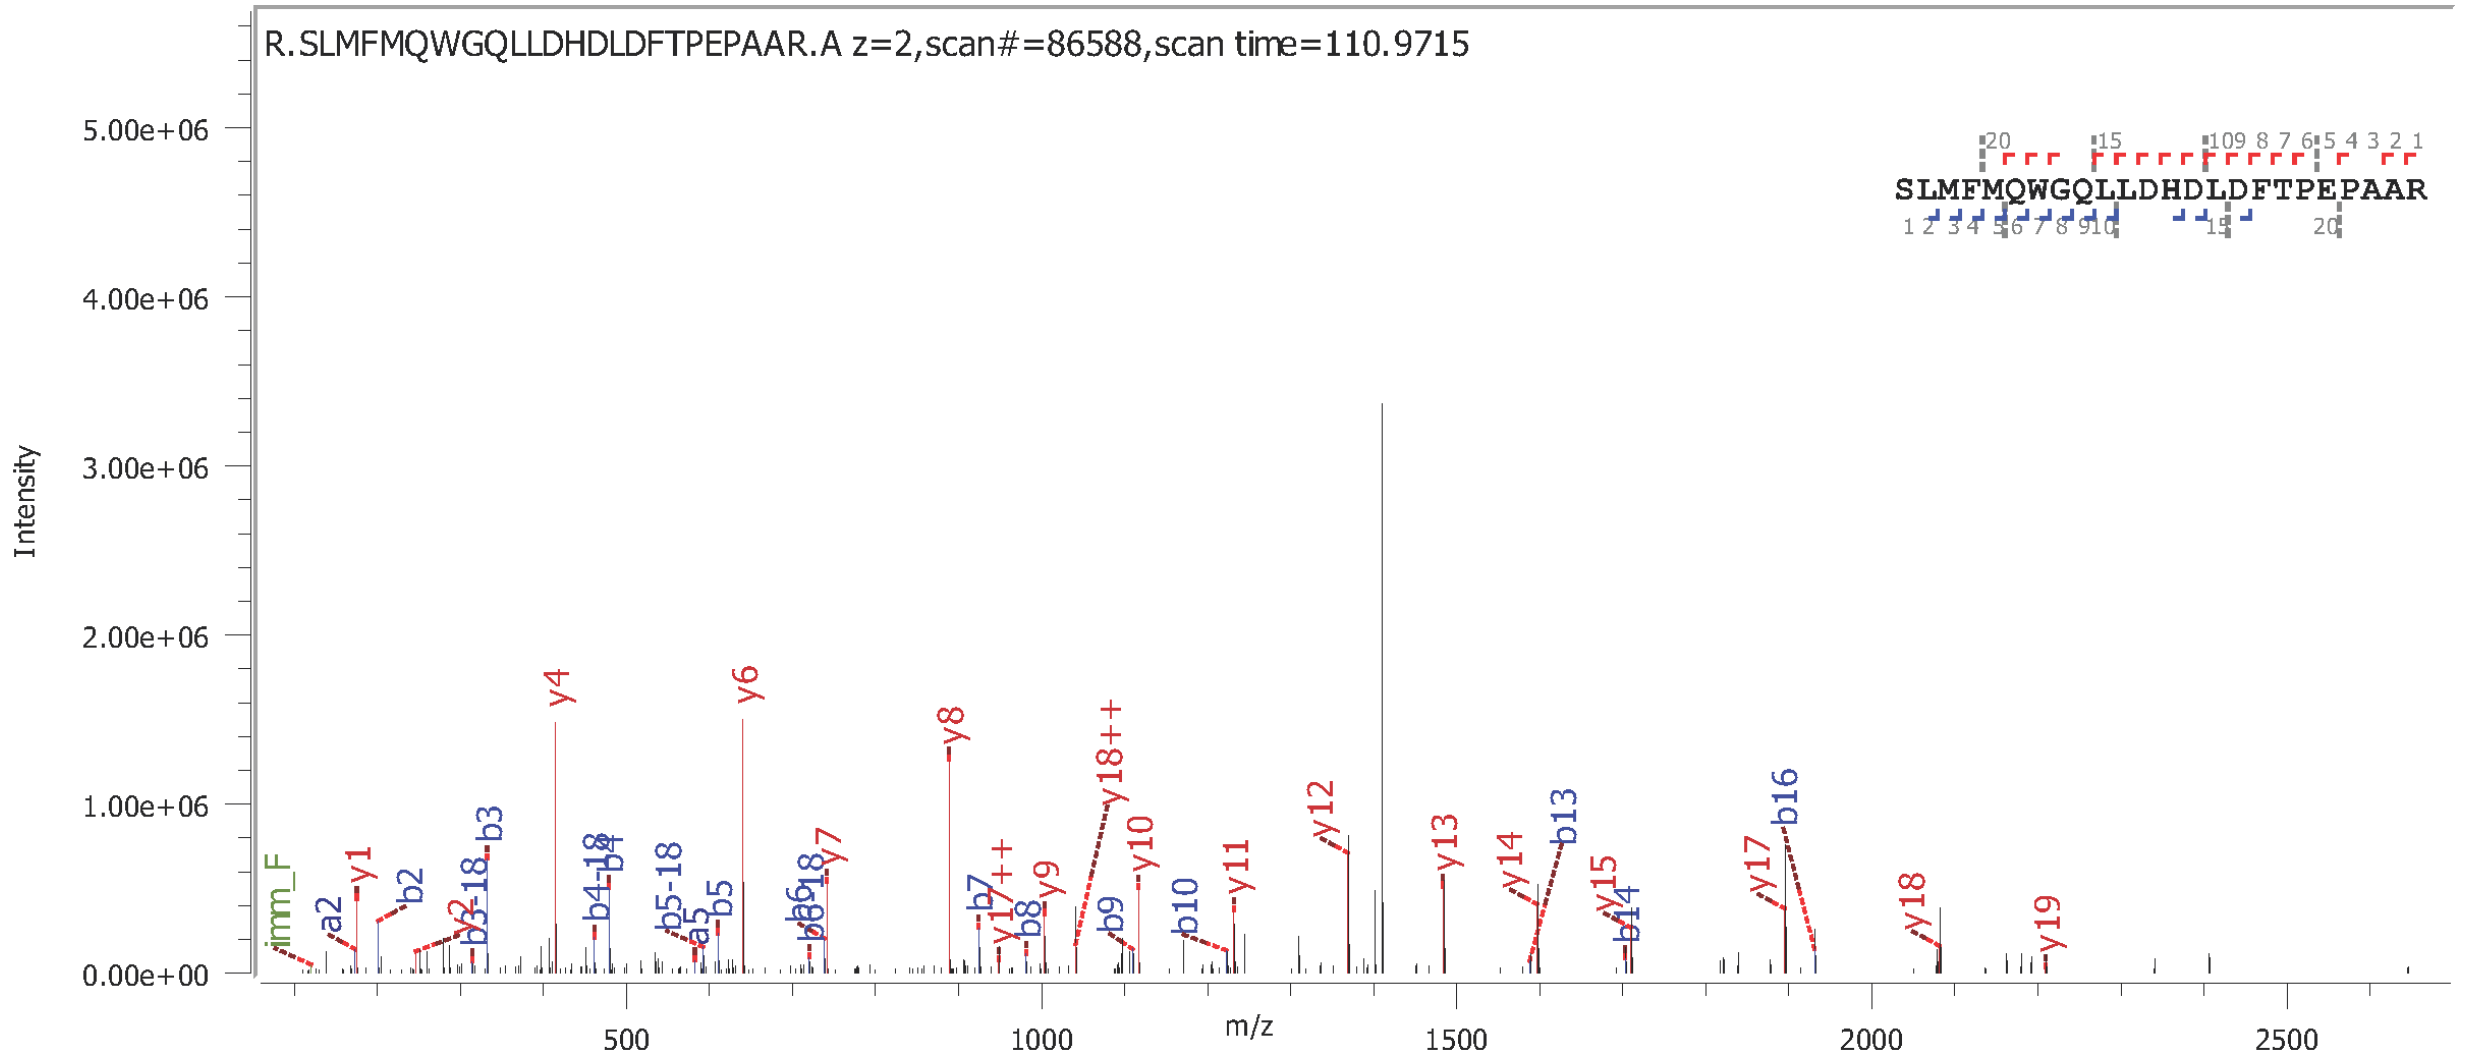

# Human myeloperoxidase (P05164)

## $\beta$ -chain N-terminal (truncation variant)

<sup>277</sup>TGVNCETSCVQQPPCFPLKIPPNDPR (identification confidence level, PEP 2D:  $8.7 \times 10^{-14}$ )

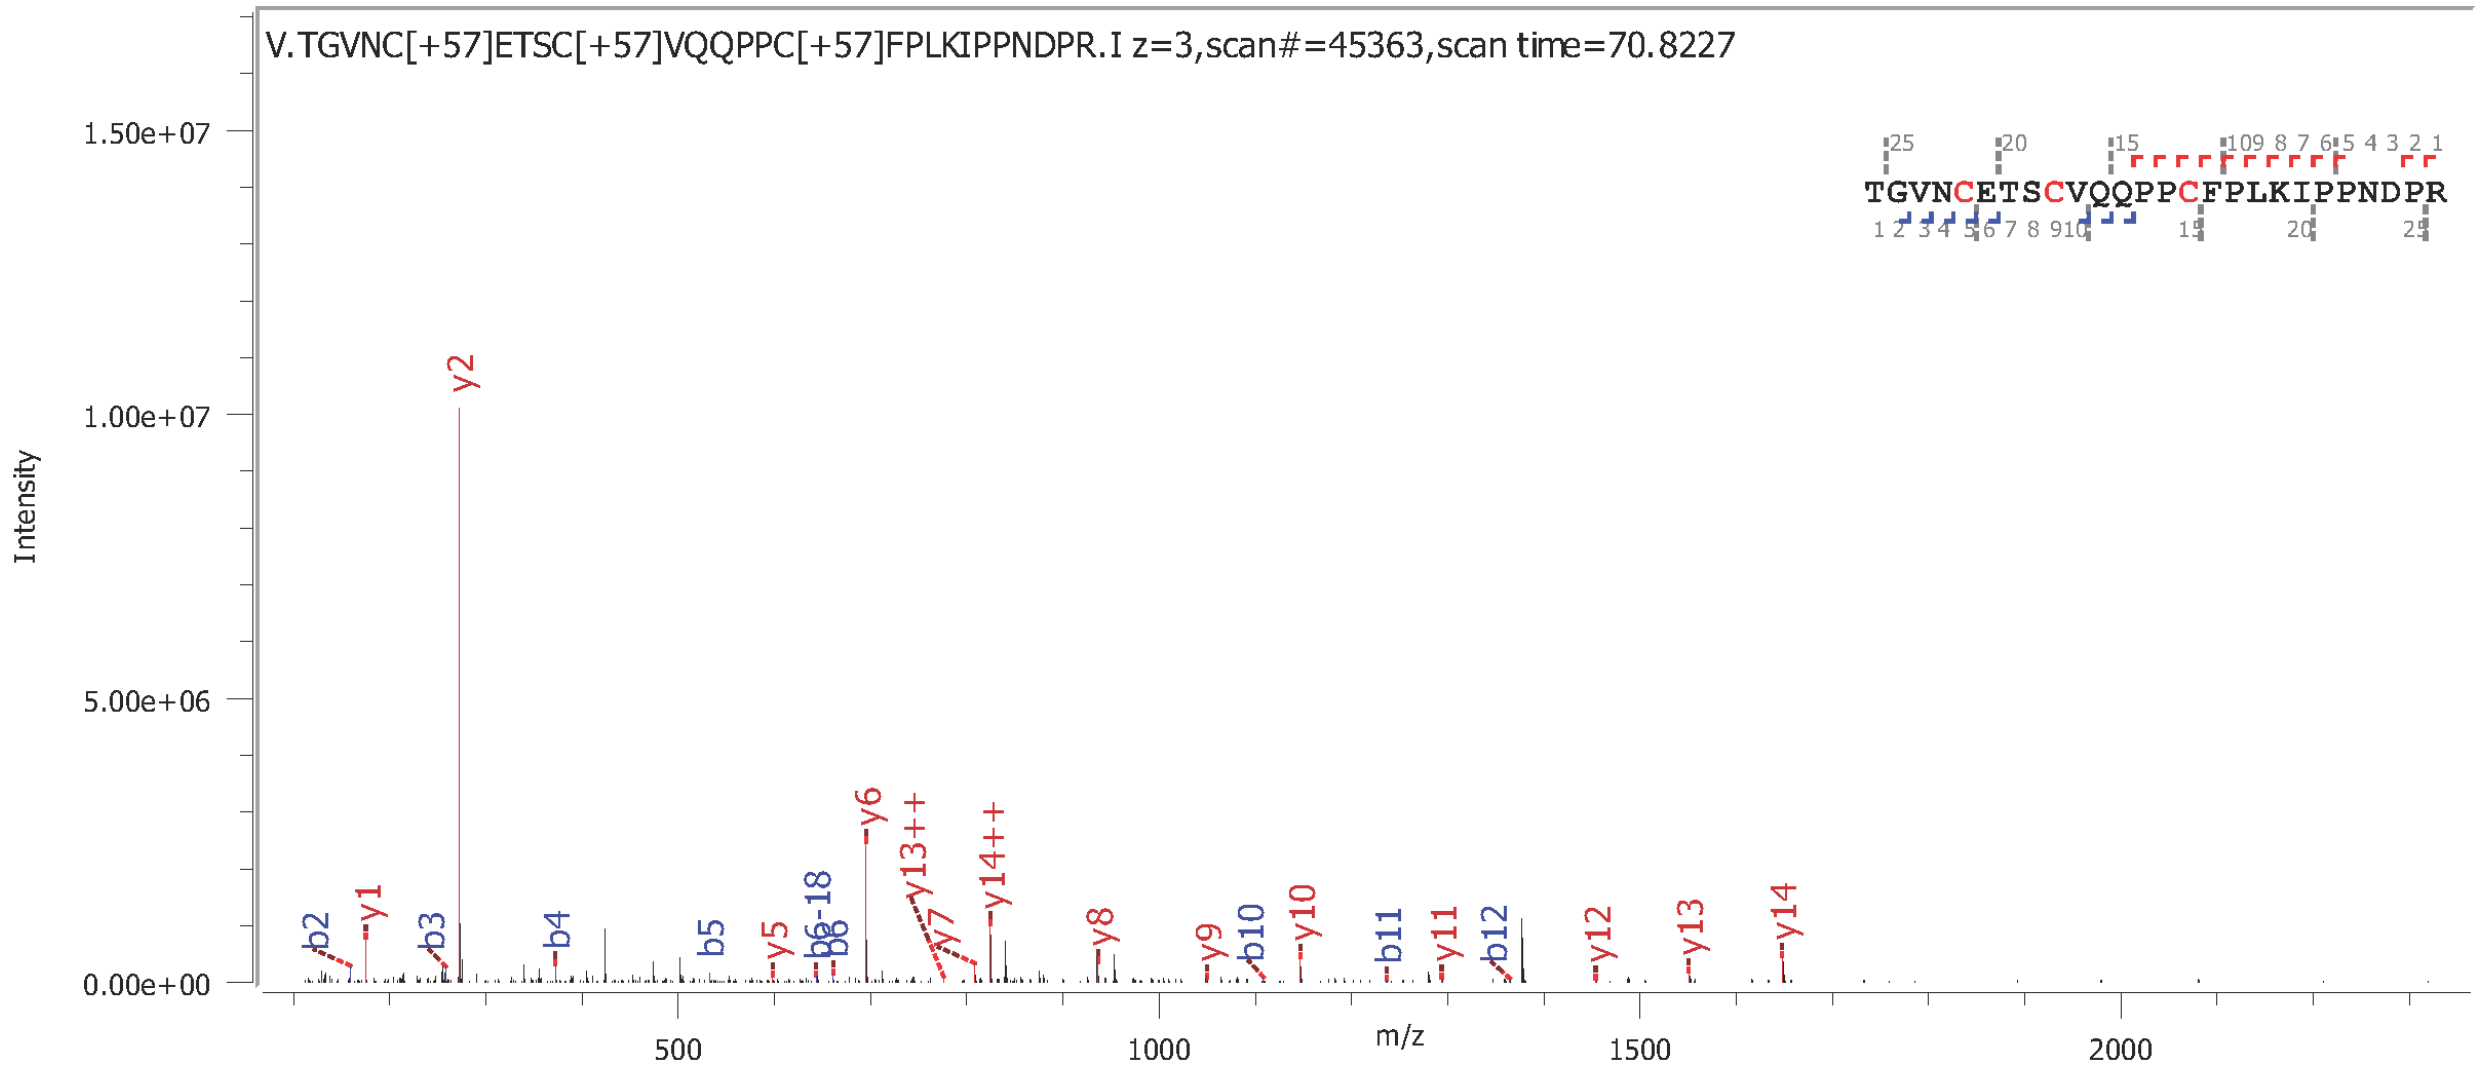

# Human myeloperoxidase (P05164)

## $\beta$ -chain N-termini (truncation variant)

<sup>278</sup>G VNCETSCVQQPPCFPLKIPPNDPR (identification confidence level, PEP 2D:  $1.1 \times 10^{-15}$ )

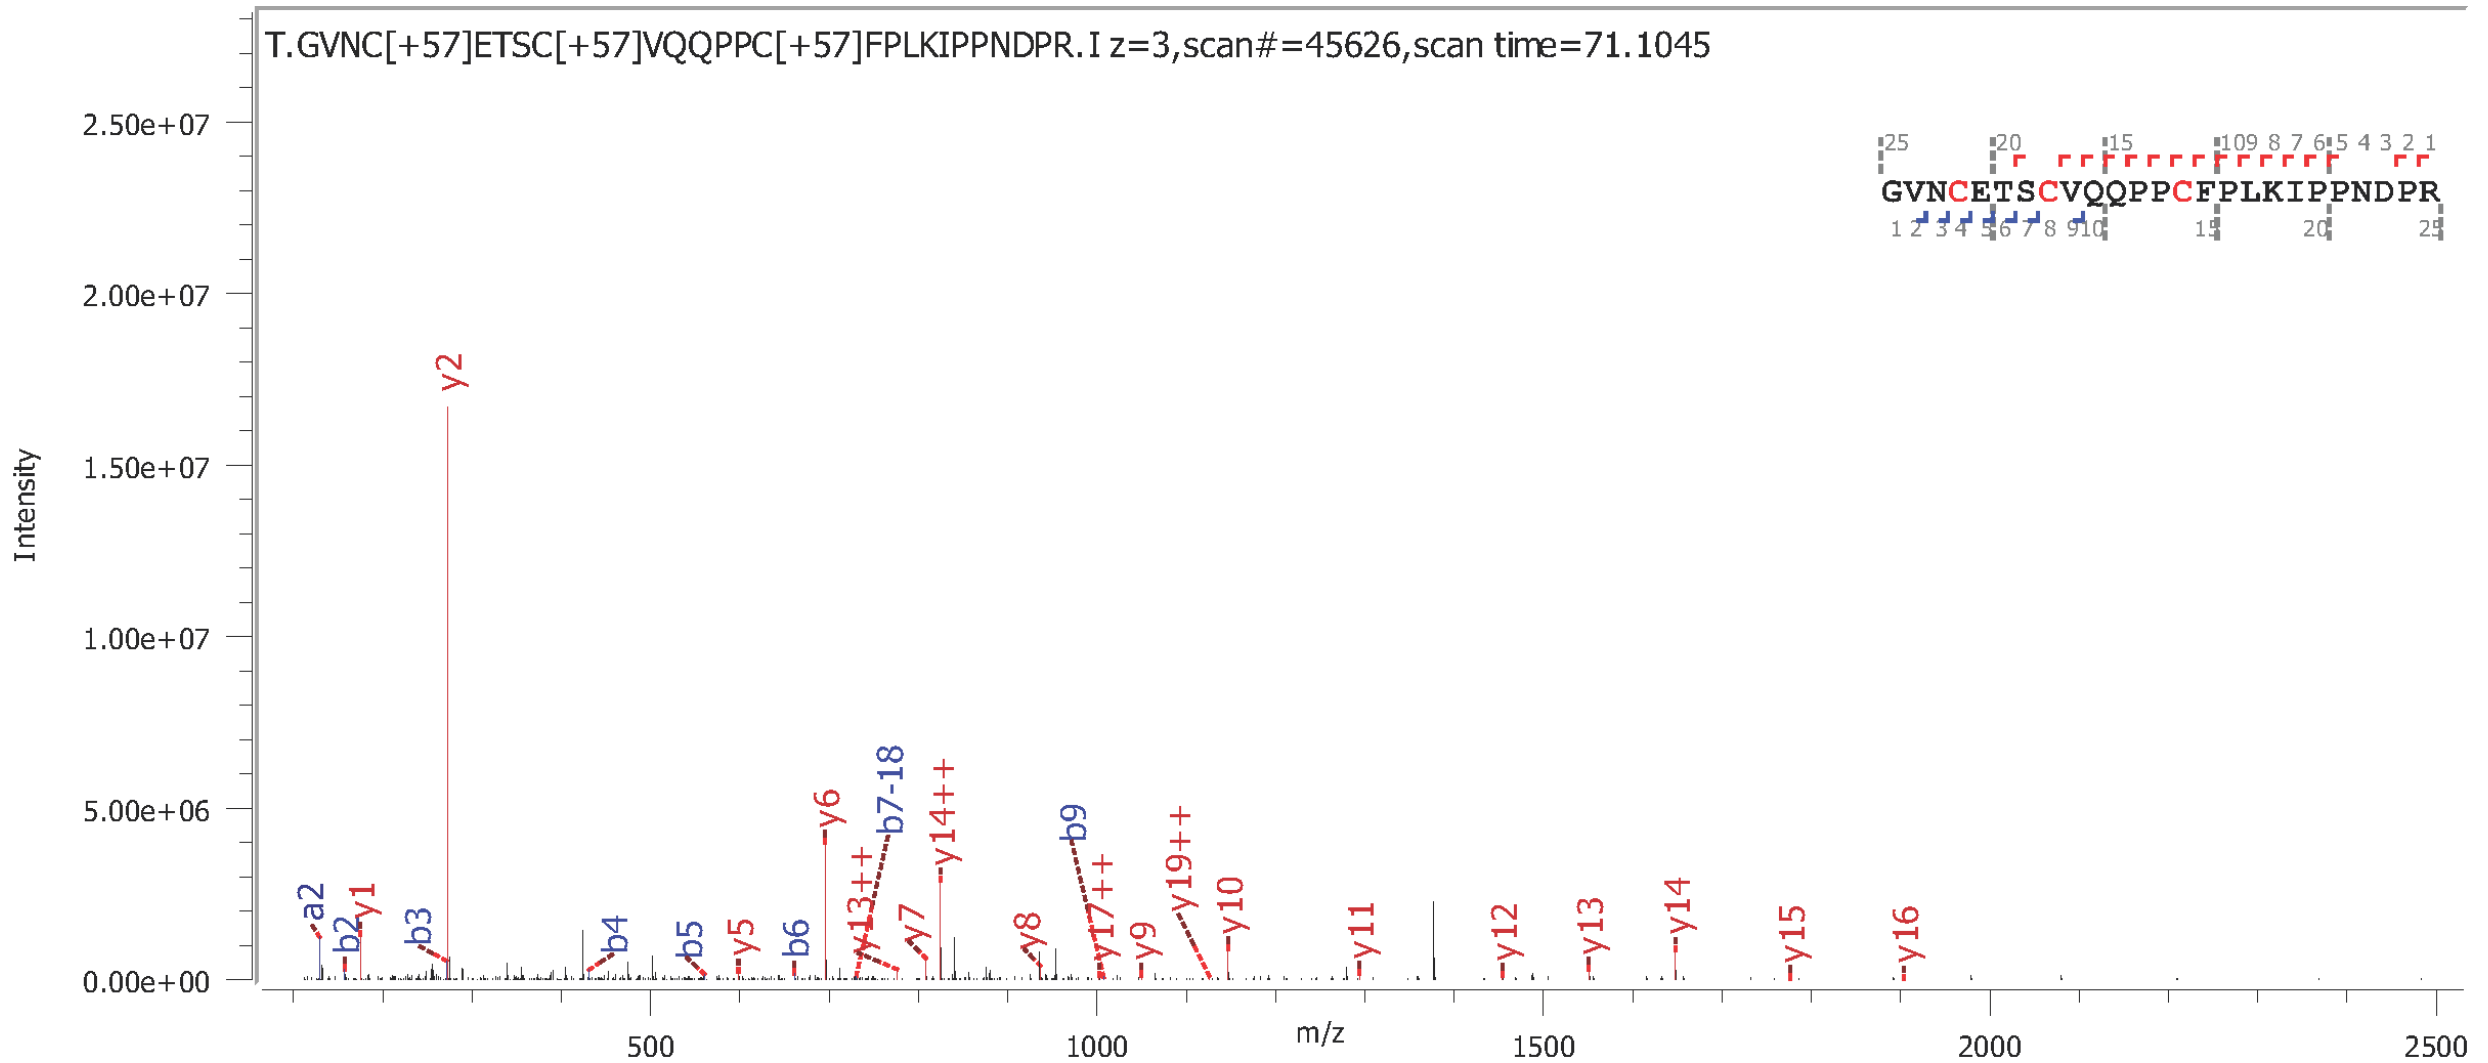

# Human myeloperoxidase (P05164)

## $\beta$ -chain N-terminal (truncation variant)

<sup>279</sup>VNCETSCVQQPPCFPLKIPPNDPR (identification confidence level, PEP 2D:  $1.5 \times 10^{-17}$ )

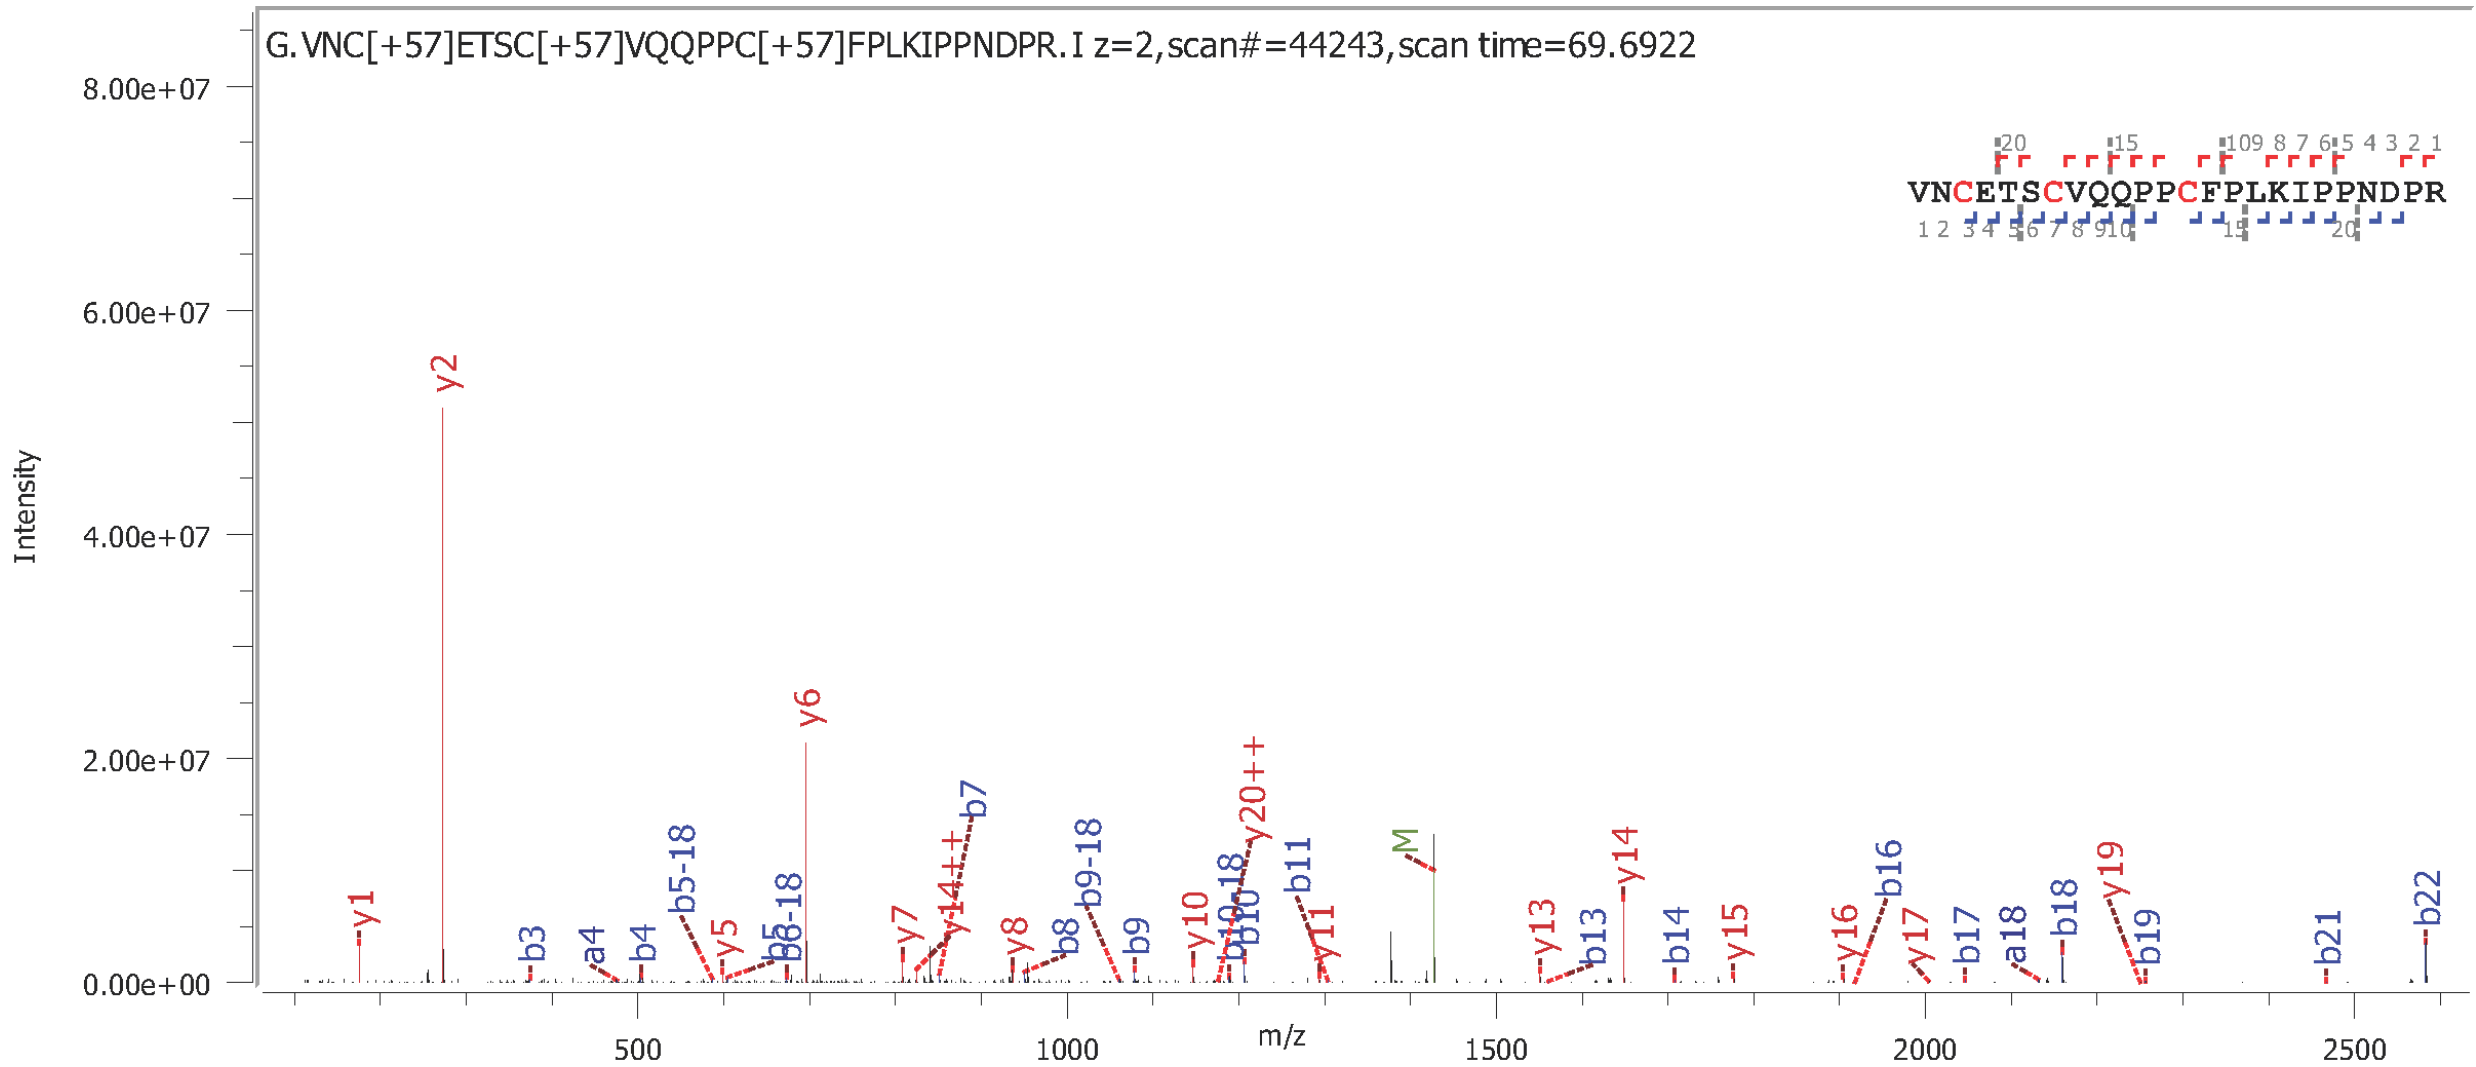

# Human myeloperoxidase (P05164)

## $\beta$ -chain C-terminal

DFVNCSTLPALNLASWREAS<sup>S745</sup> (identification confidence level, PEP 2D:  $1.4 \times 10^{-8}$ )

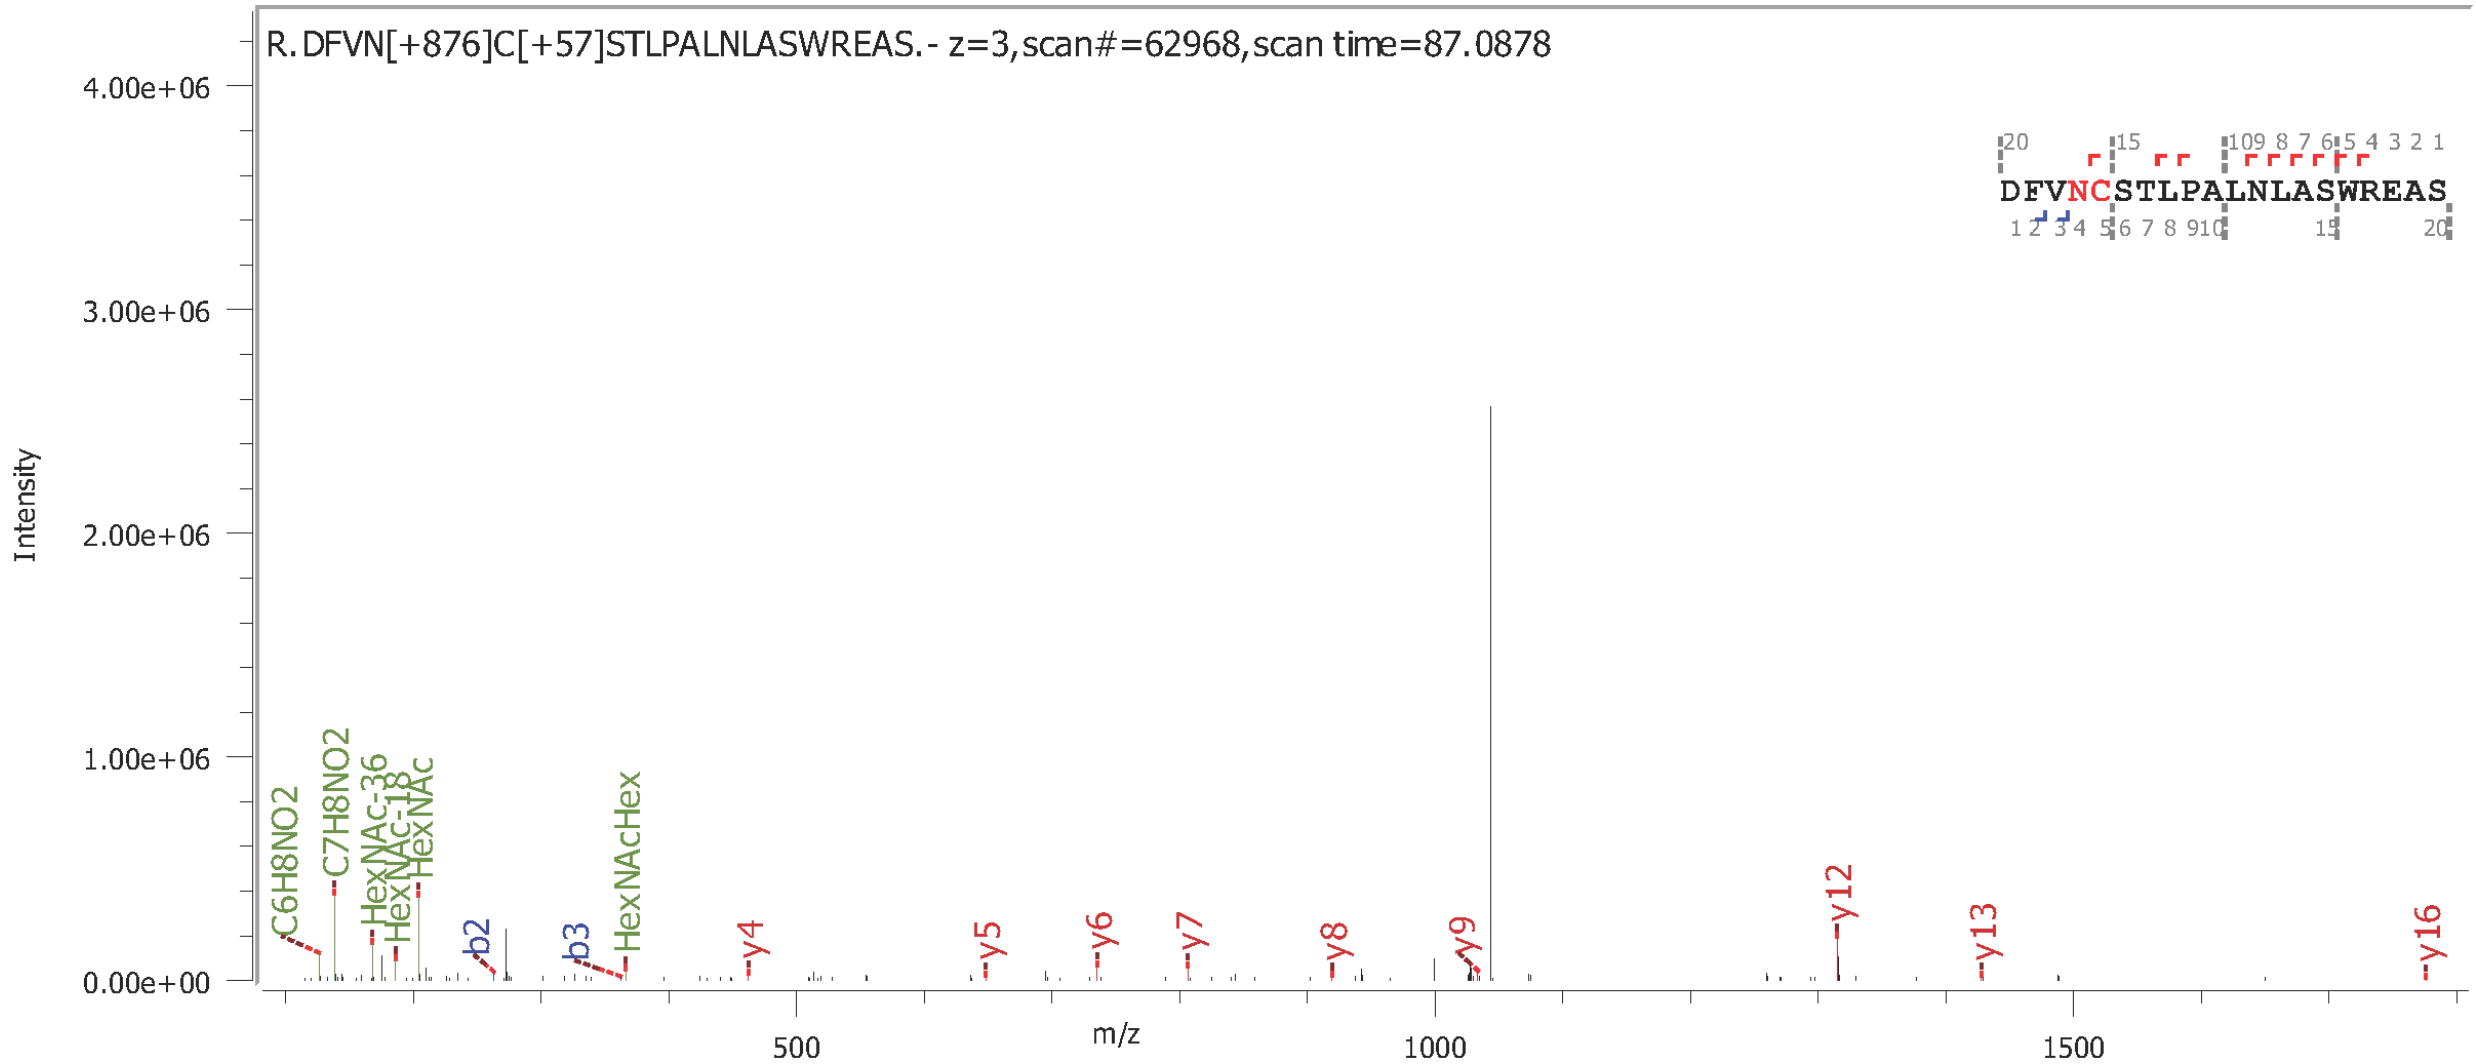



## **Supplementary Data S3A**

Manually annotated reversed phase-LC-ESI-HCD-MS/MS (+) spectra of all glycosylated and non-glycosylated peptides containing Asn323 identified from the analysis of the unenriched peptide mixtures of nMPO.

# Non-glycosylated peptide

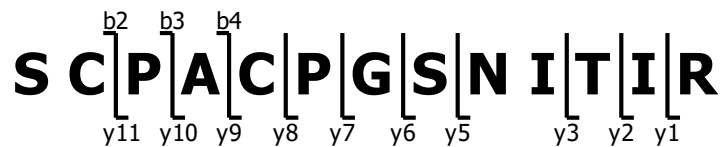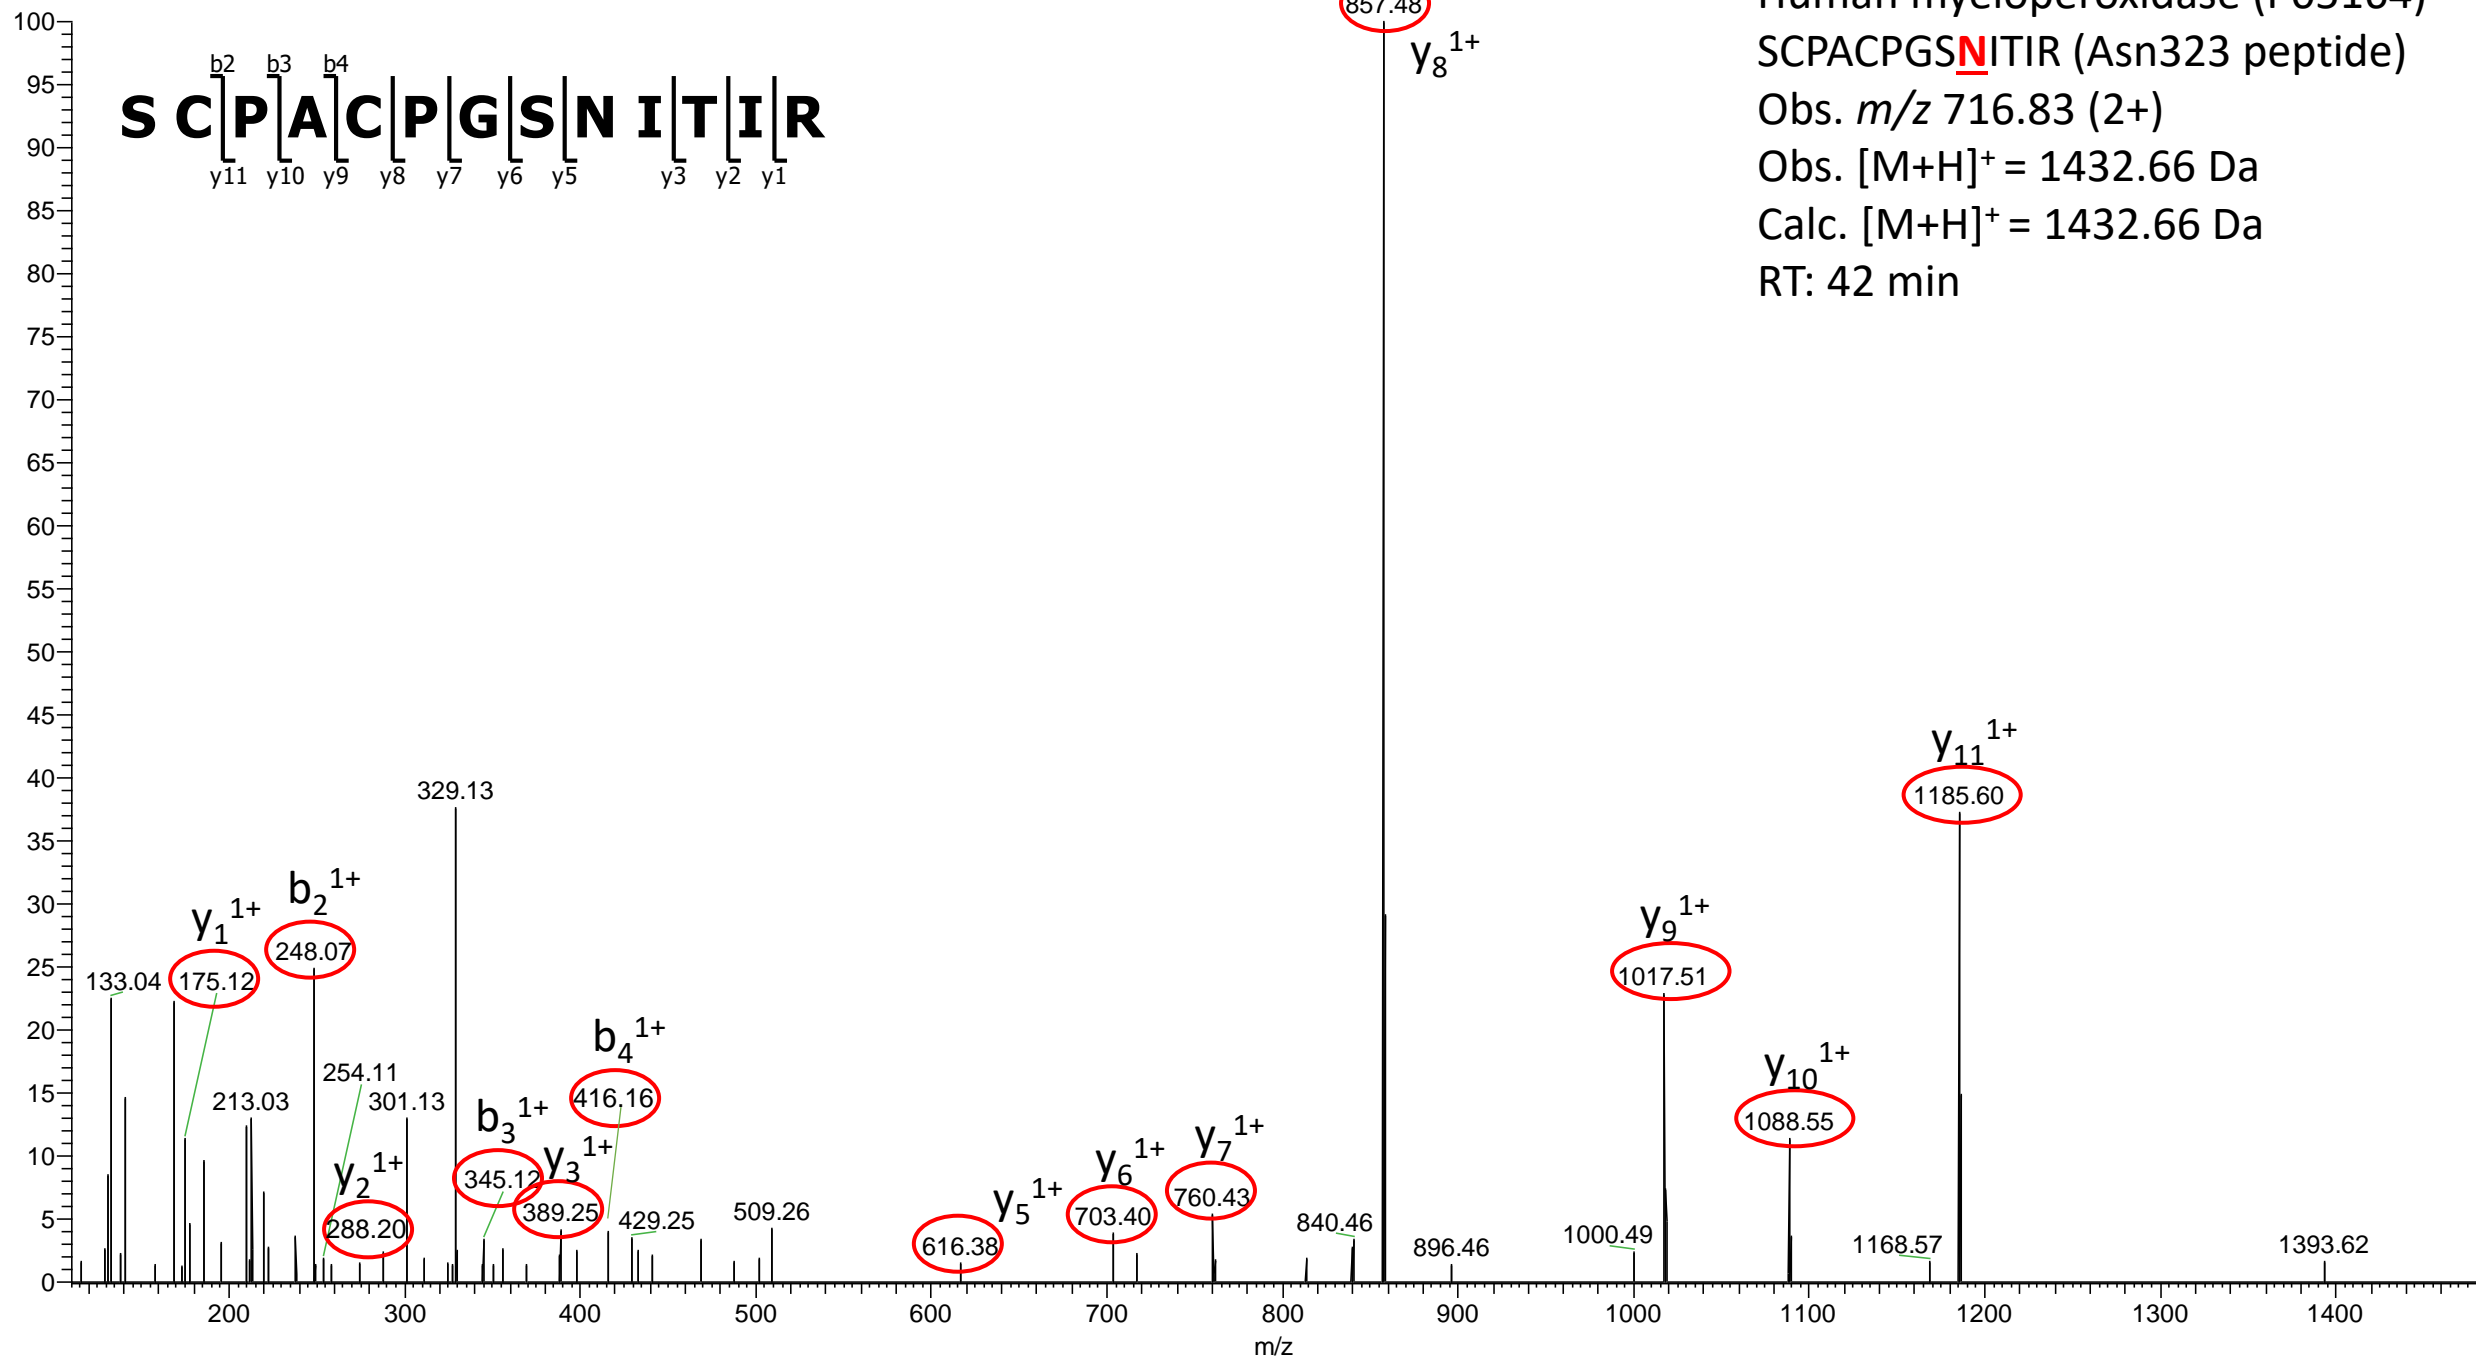

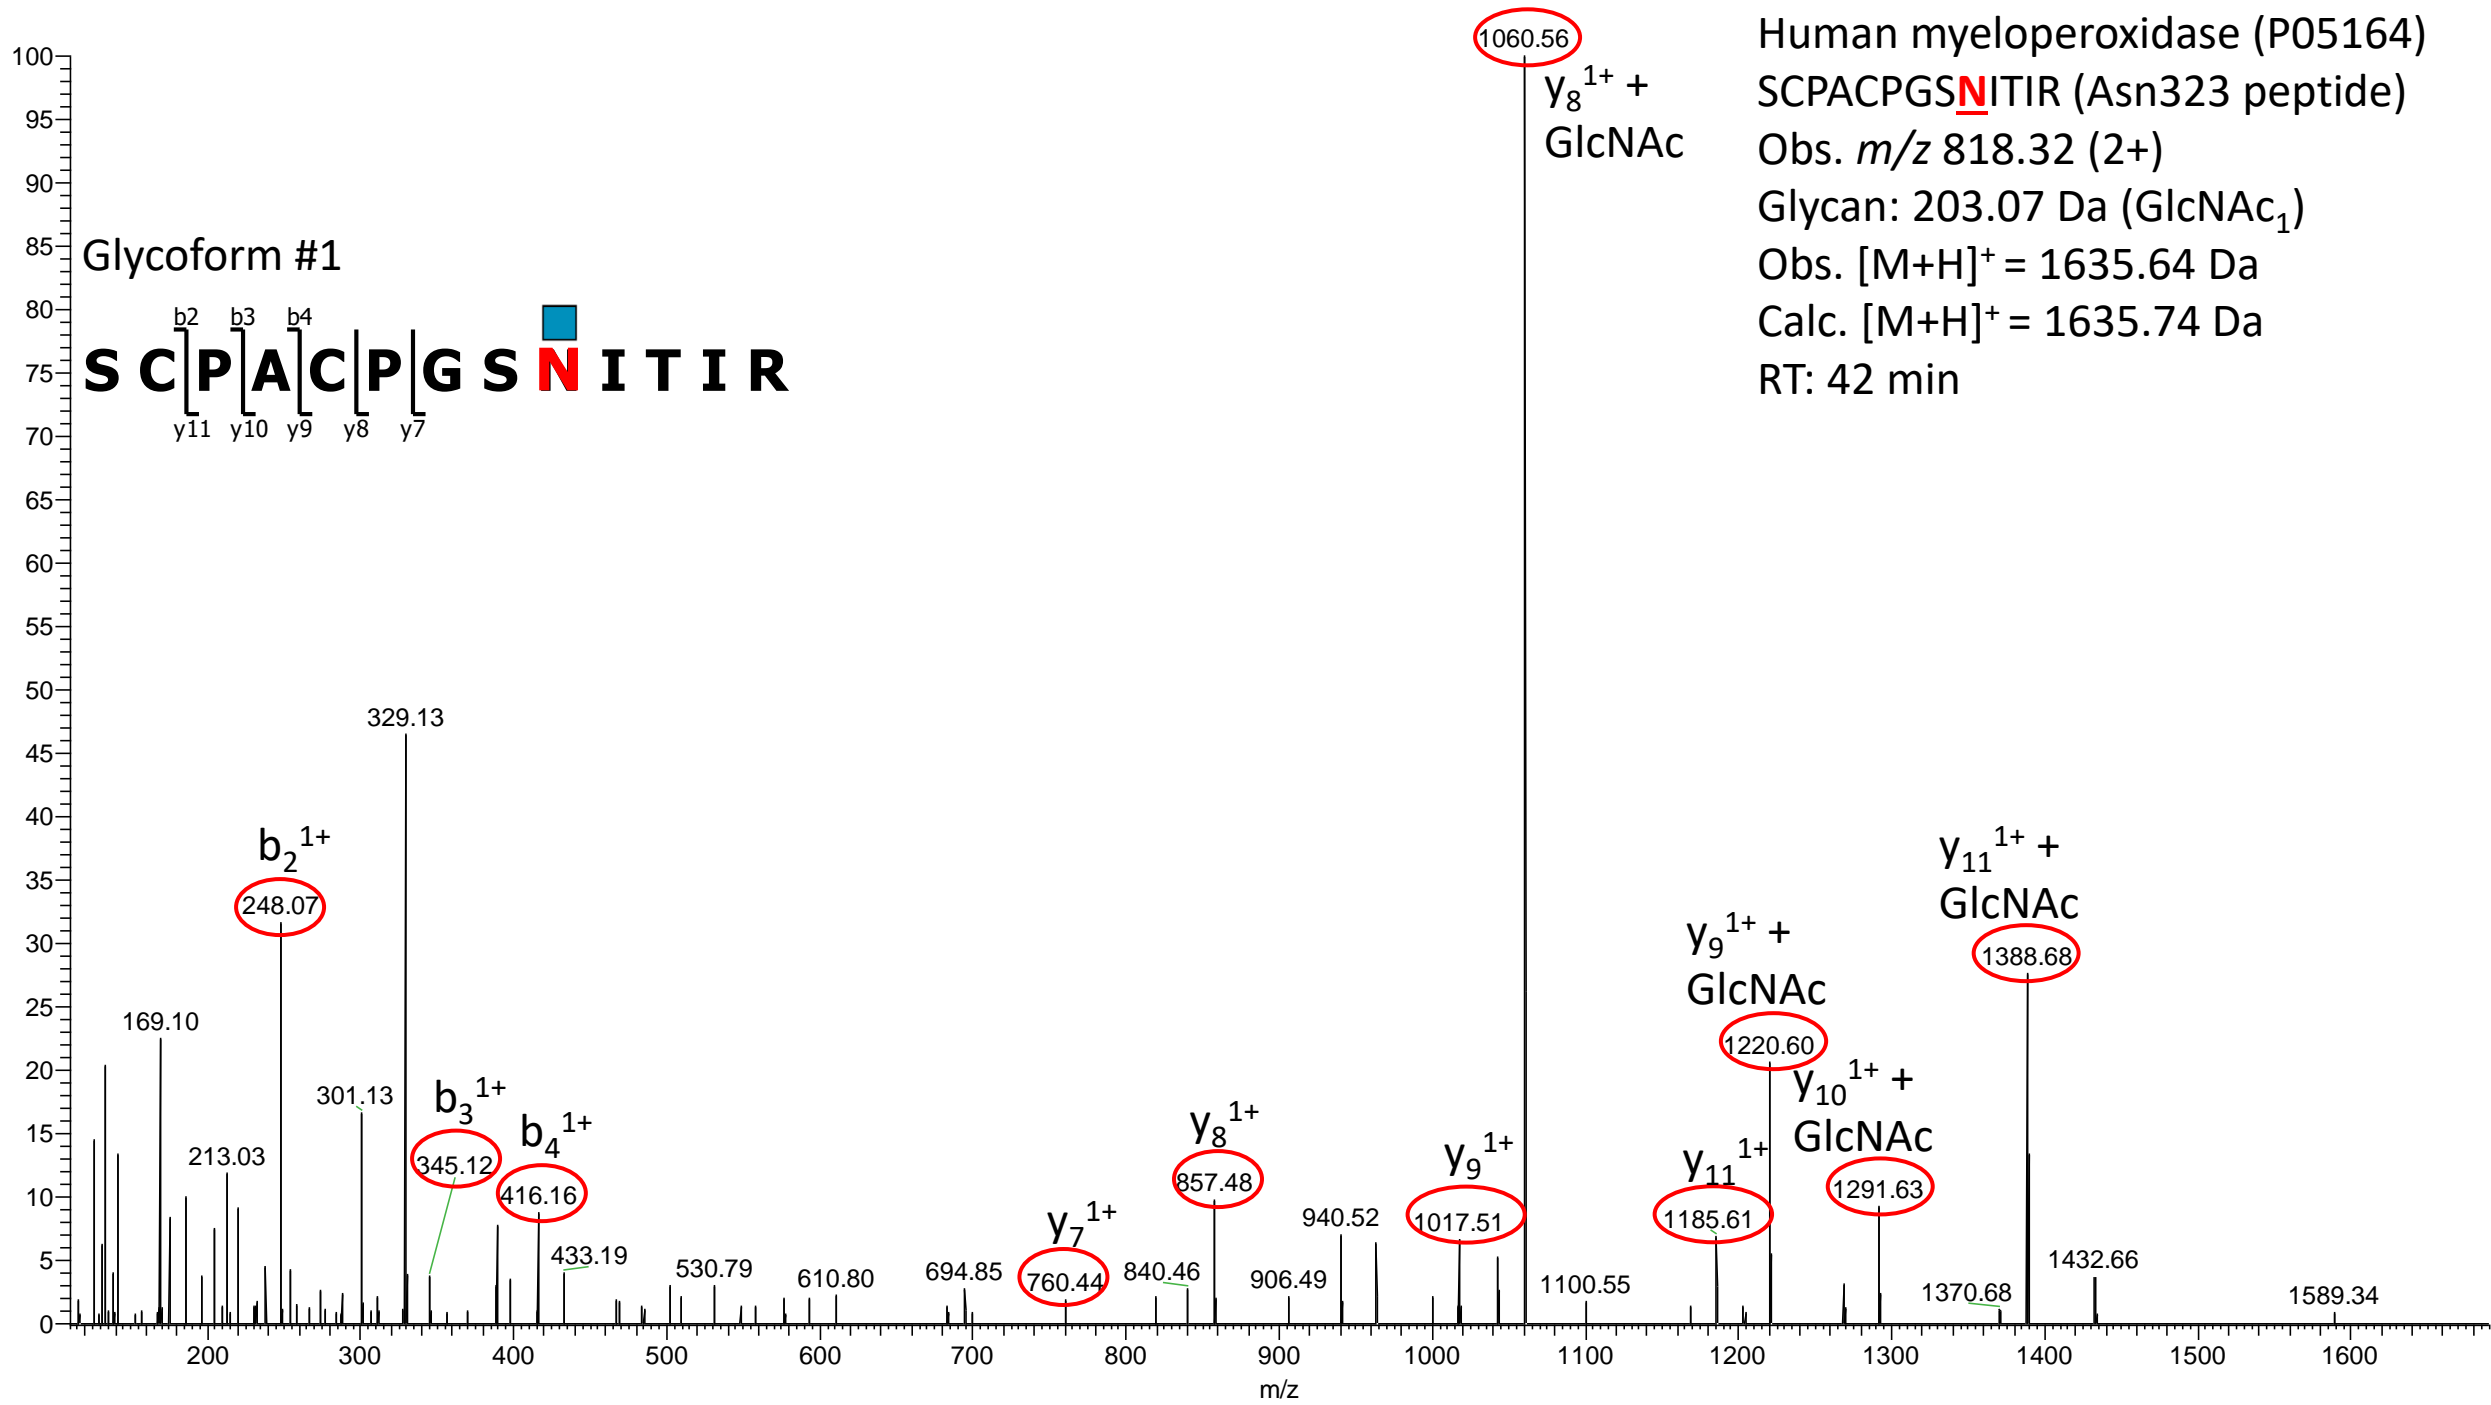

Human myeloperoxidase (P05164)

SCPACPGS**N**ITIR (Asn323 peptide)

Obs.  $m/z$  891.36 (2+)

Glycan: 349.14 Da (GlcNAc<sub>1</sub>Fuc<sub>1</sub>)

Obs.  $[M+H]^+ = 1781.72$  Da

Calc.  $[M+H]^+ = 1781.80$  Da

RT: 41 min

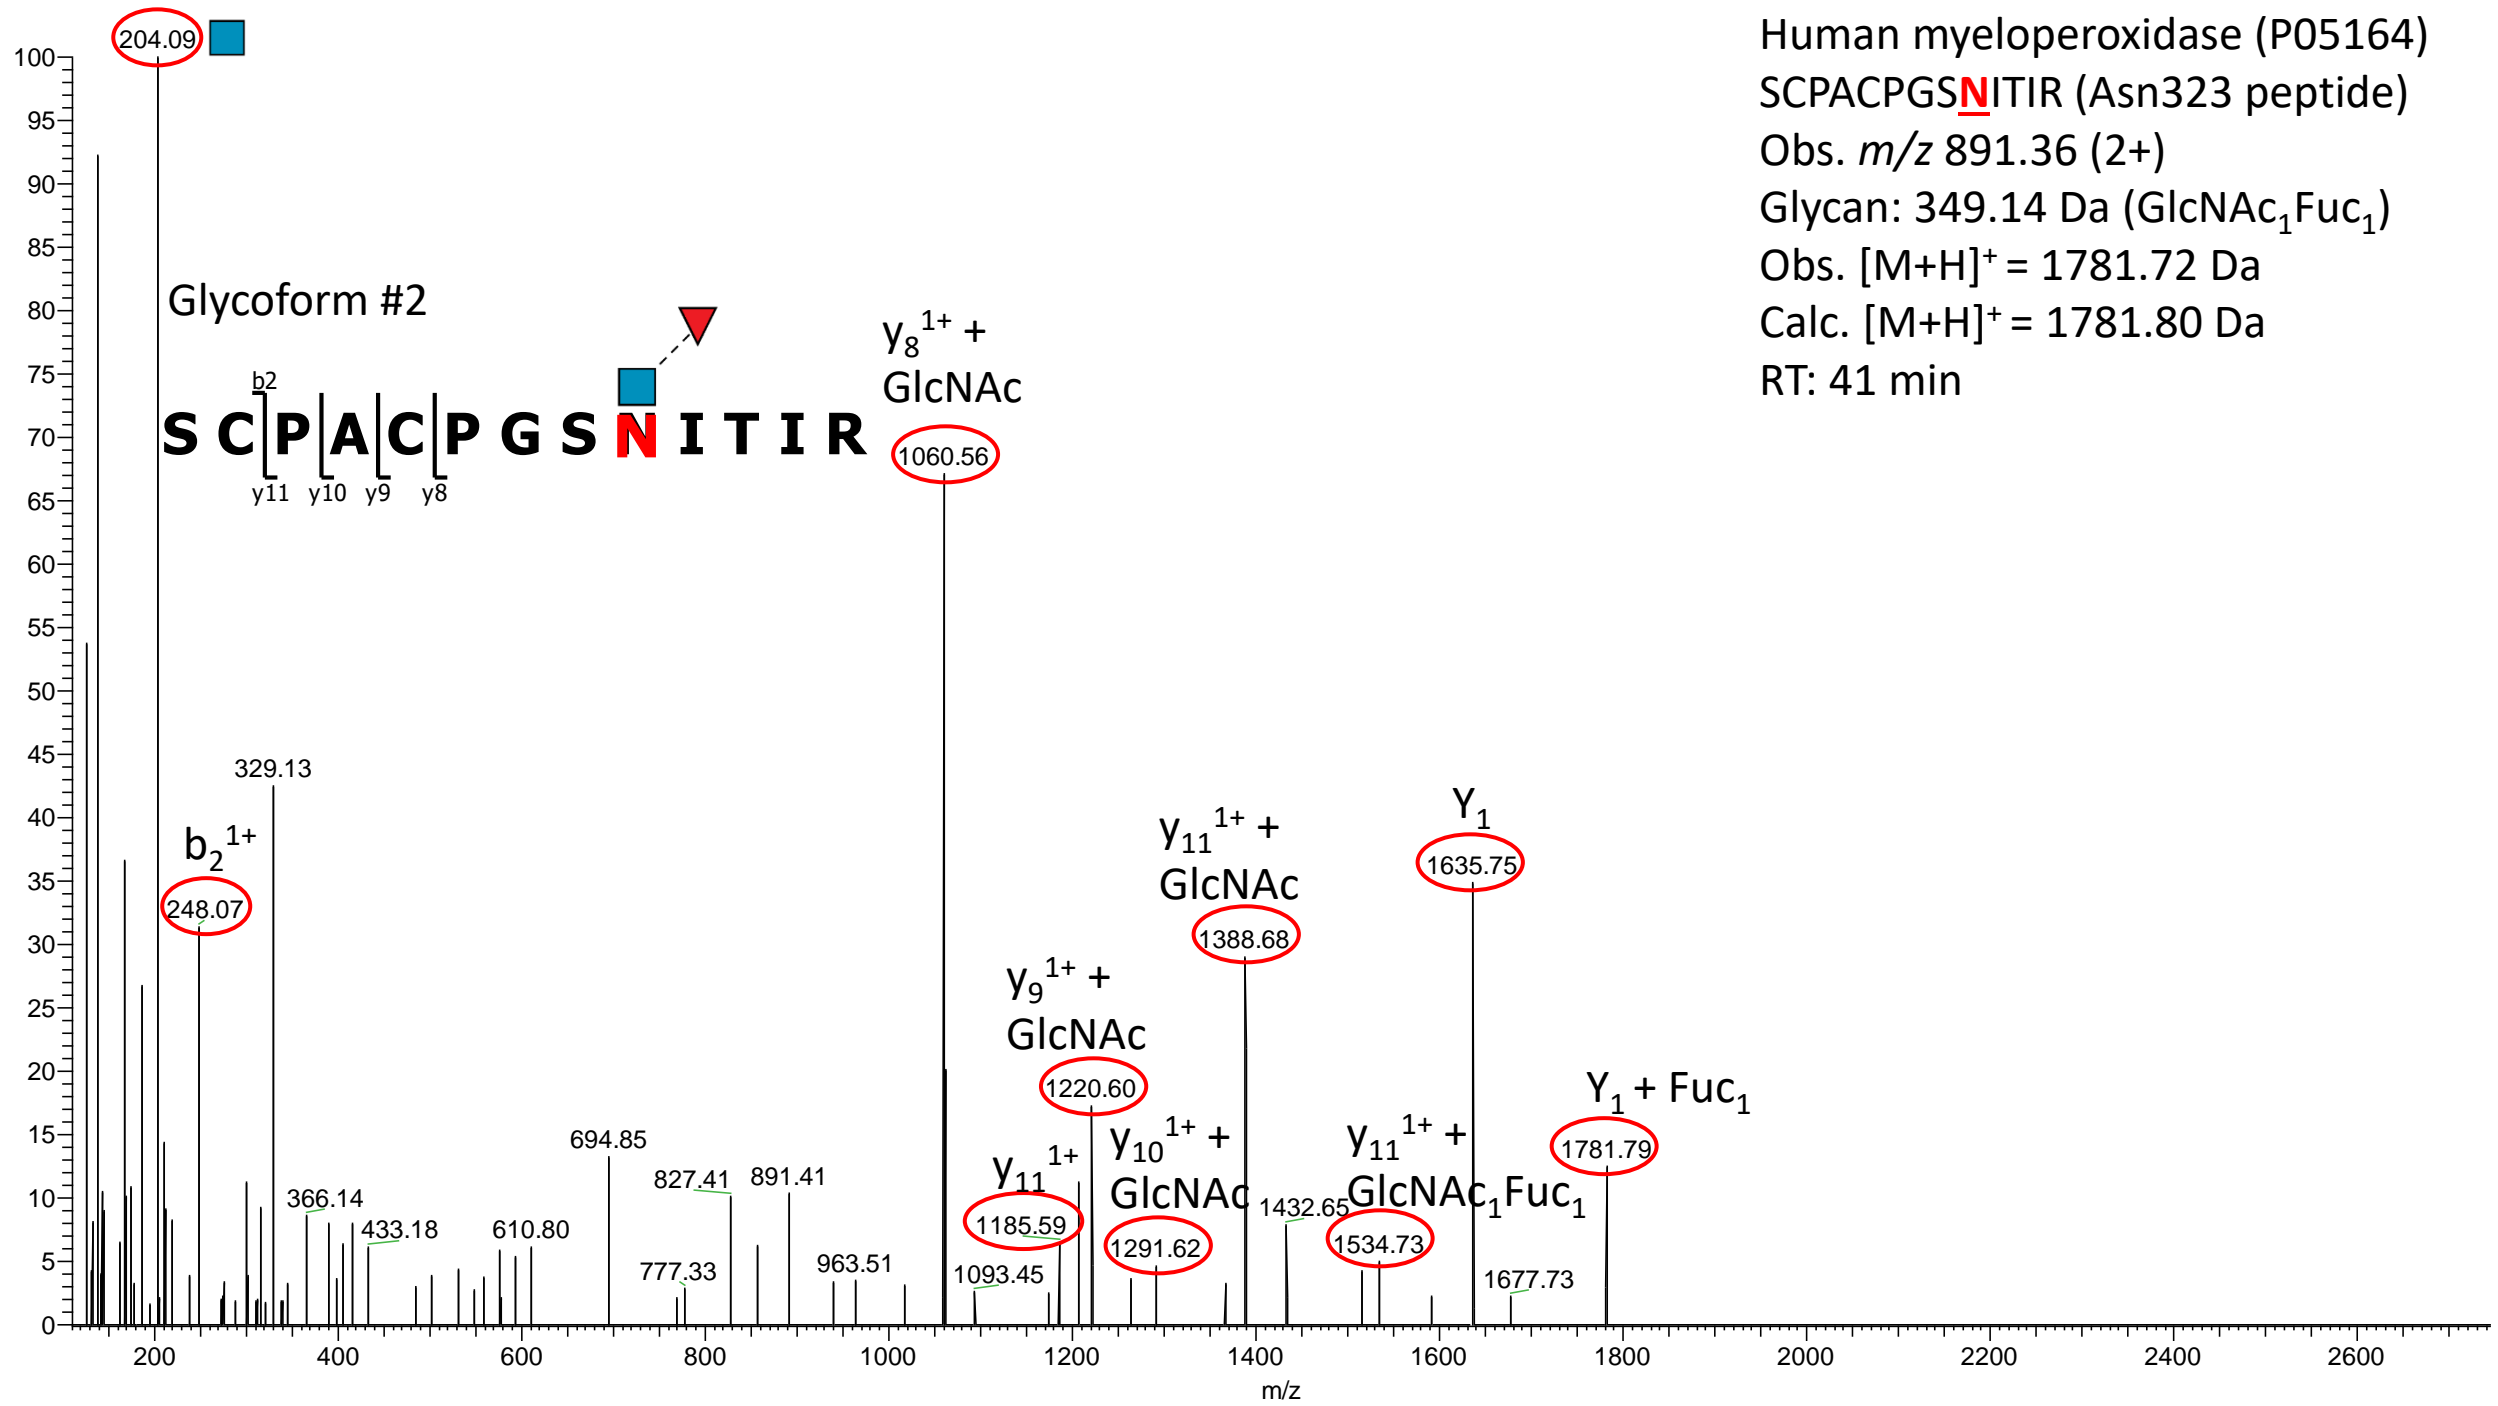

Human myeloperoxidase (P05164)

SCPACPGS**N**ITIR (Asn323 peptide)

Obs.  $m/z$  919.91 (2+)

Glycan: 406.15 Da (GlcNAc<sub>2</sub>)

Obs.  $[M+H]^+$  = 1838.84 Da

Calc.  $[M+H]^+$  = 1838.83 Da

RT: 42 min

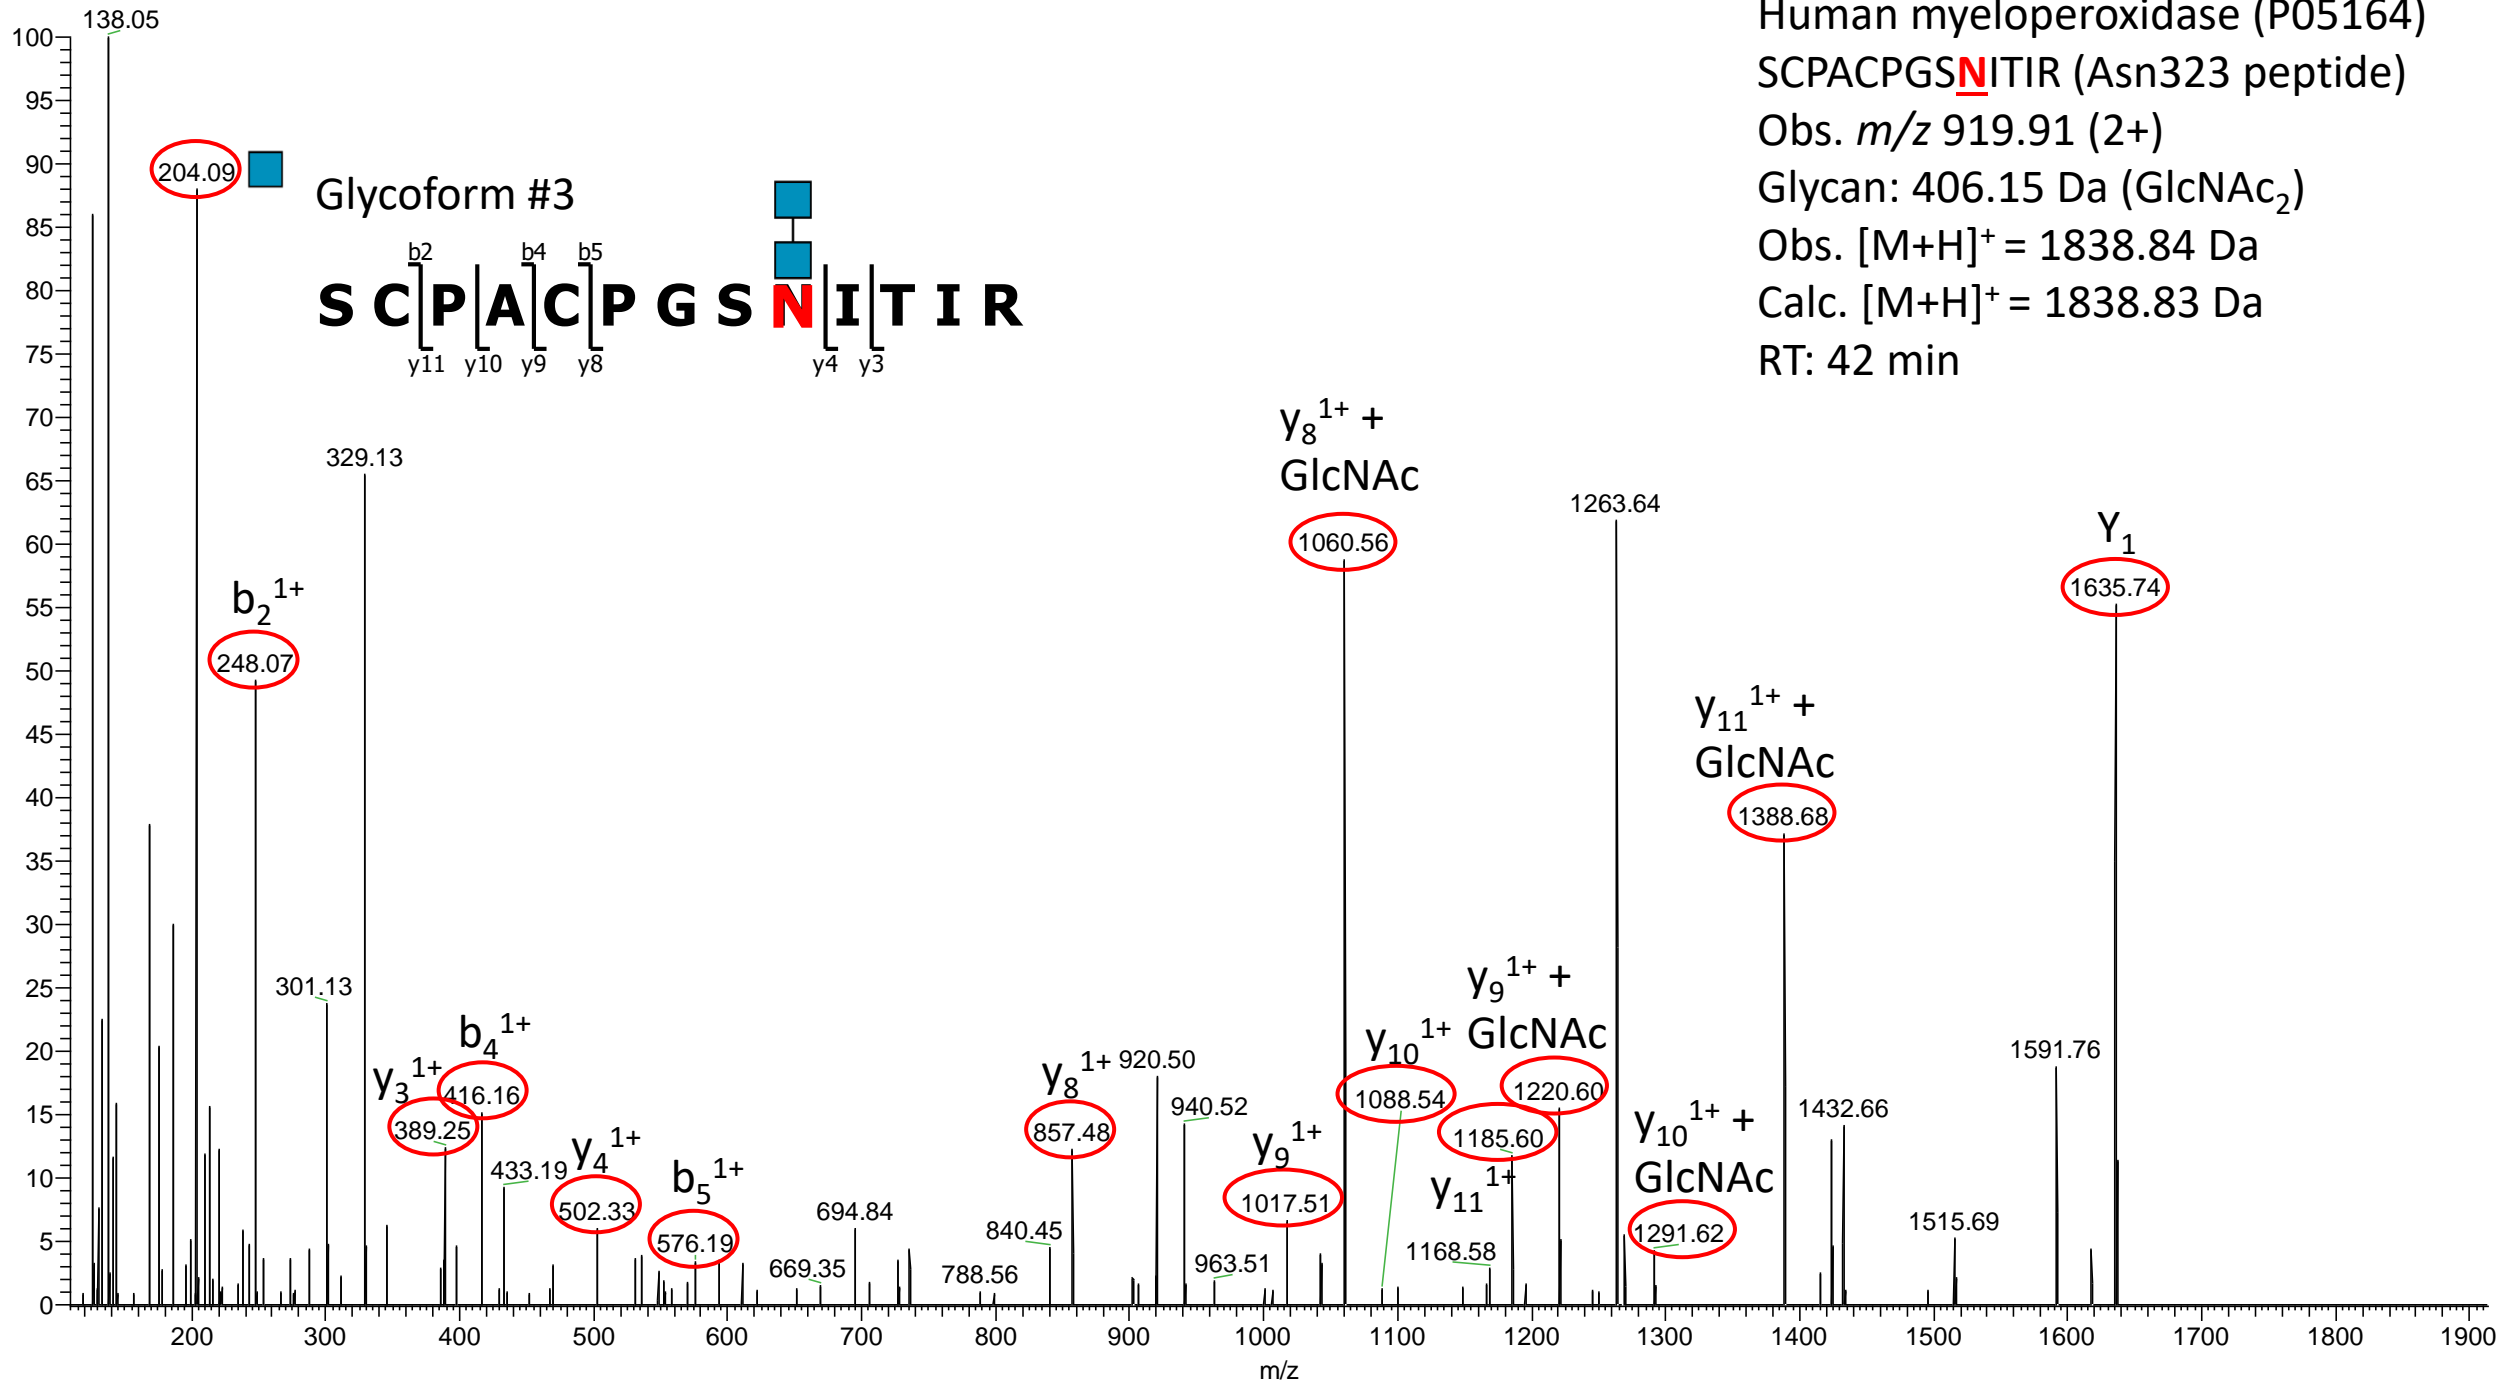

Human myeloperoxidase (P05164)

SCPACPGS**N**ITIR (Asn323 peptide)

Obs.  $m/z$  992.95 (2+)

Glycan: 552.22 Da (GlcNAc<sub>2</sub>Fuc<sub>1</sub>)

Obs.  $[M+H]^+$  = 1984.90 Da

Calc.  $[M+H]^+$  = 1984.88 Da

RT: 42 min

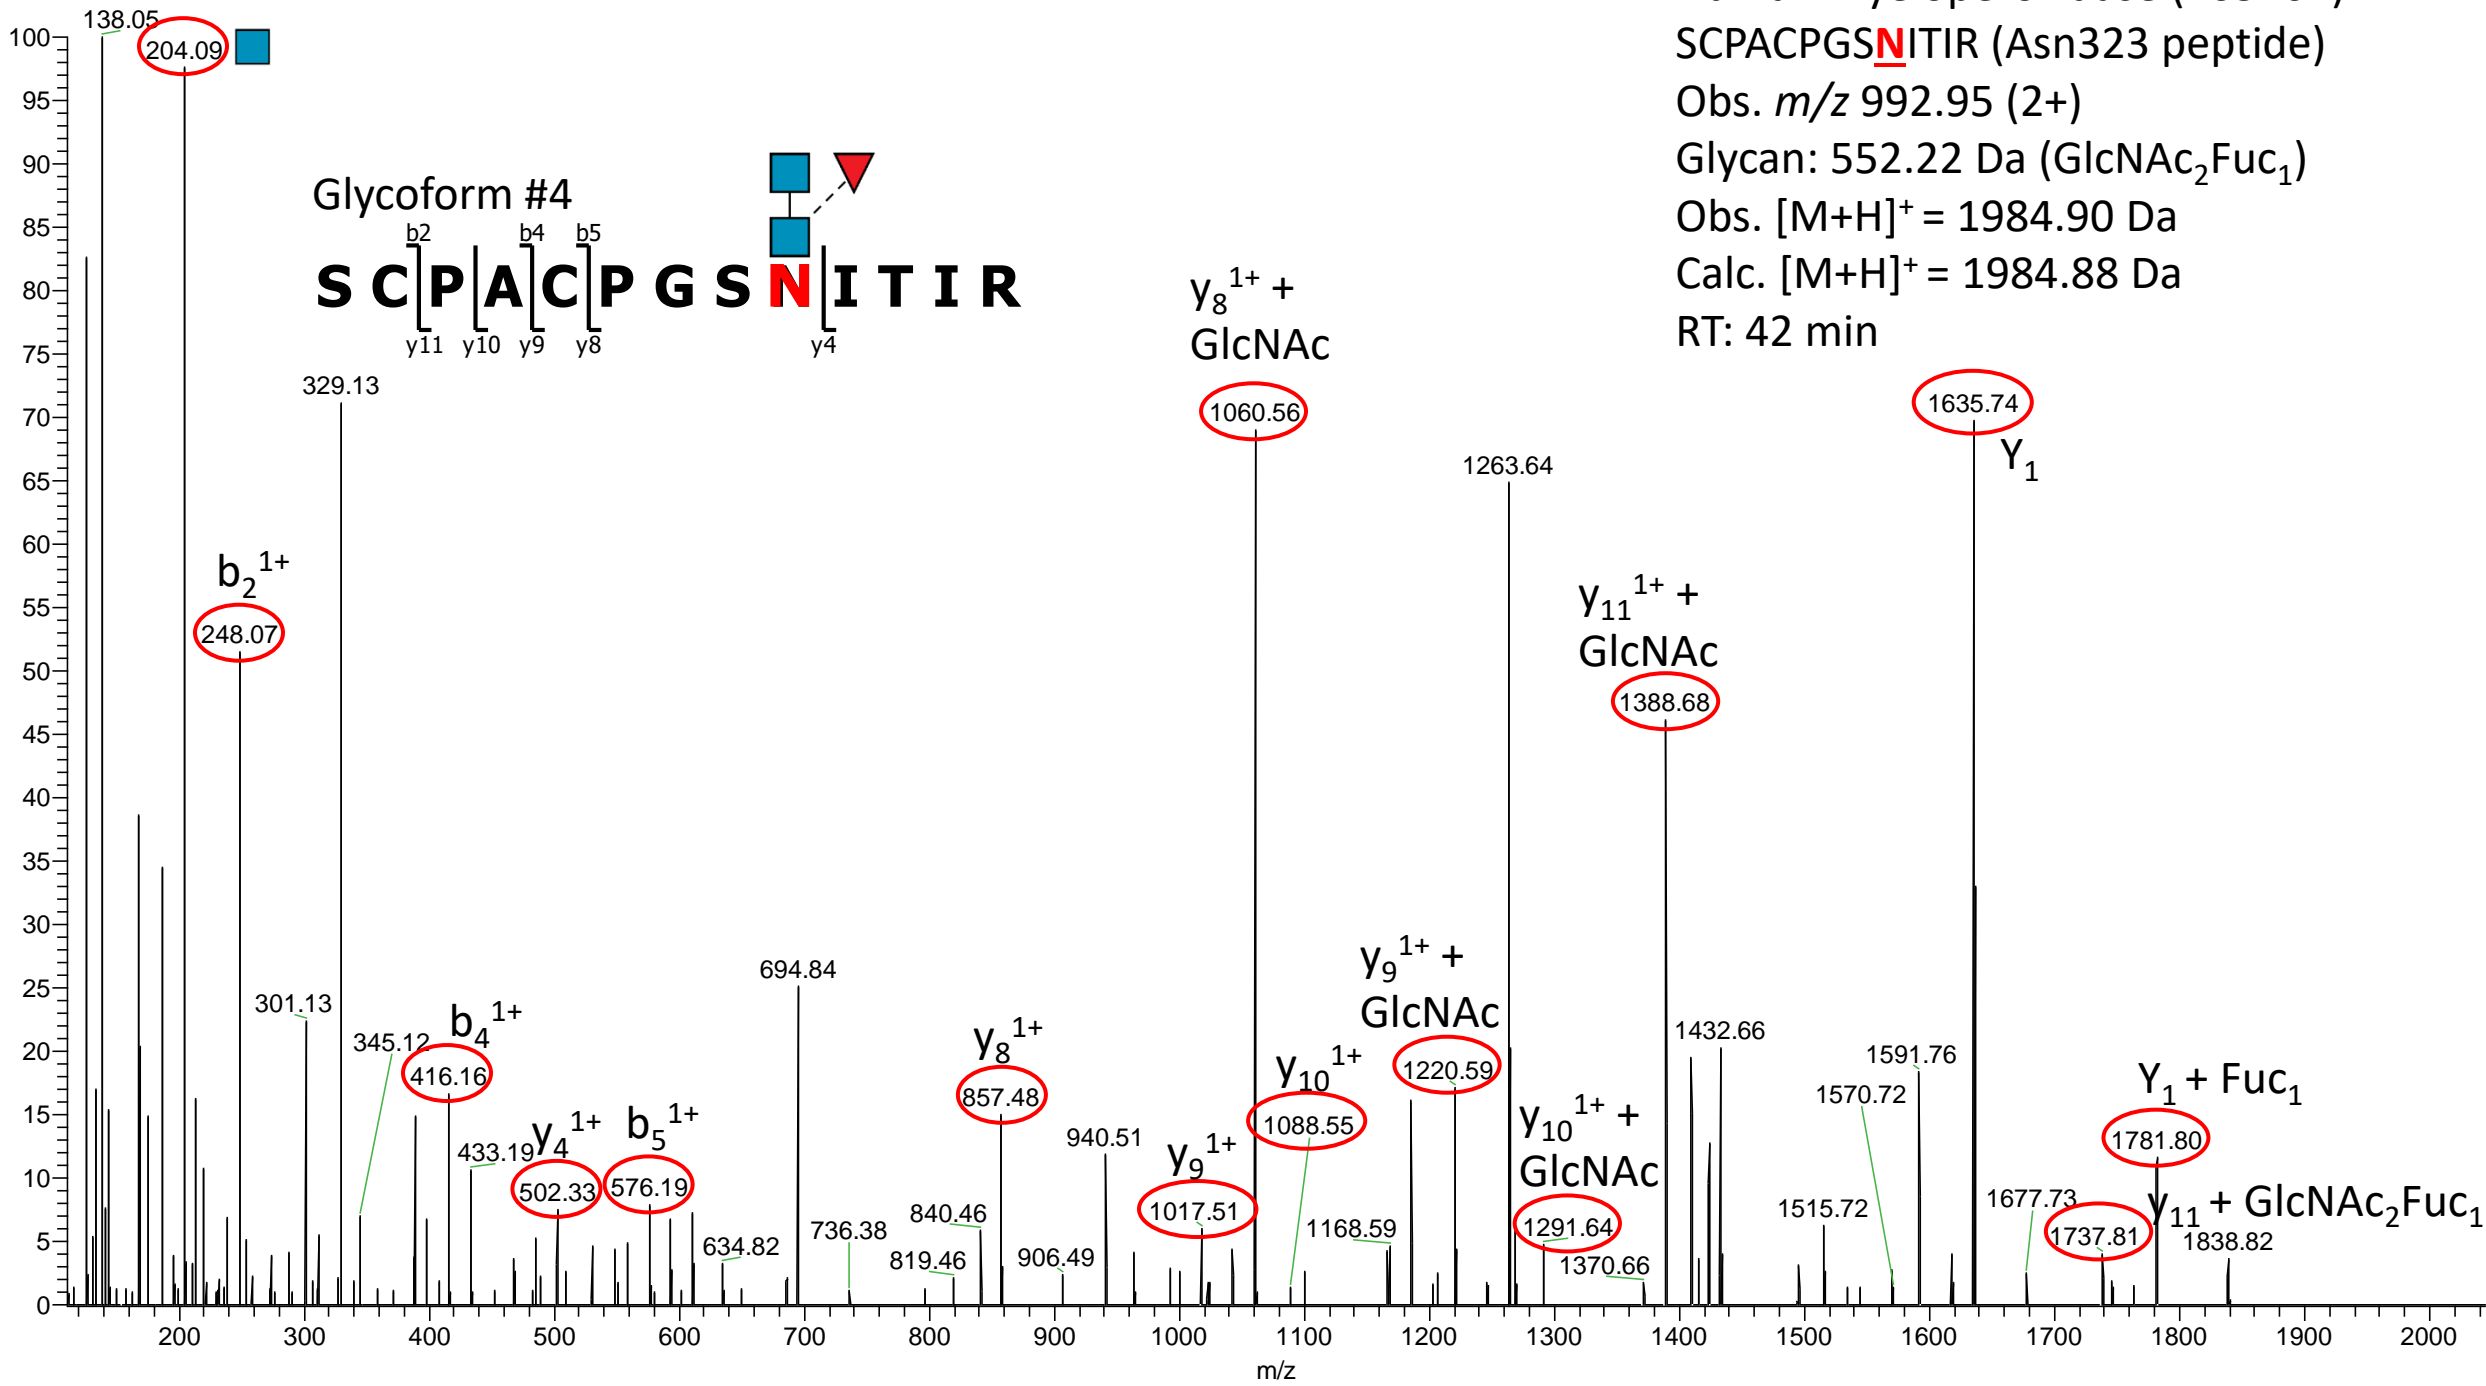

Human myeloperoxidase (P05164)

SCPACPGS**N**ITIR (Asn323 peptide)

Obs.  $m/z$  1000.93 (2+)

Glycan: 568.21 Da (GlcNAc<sub>2</sub>Hex<sub>1</sub>)

Obs.  $[M+H]^+$  = 2000.86 Da

Calc.  $[M+H]^+$  = 2000.88 Da

RT: 42 min

Glycoform #5

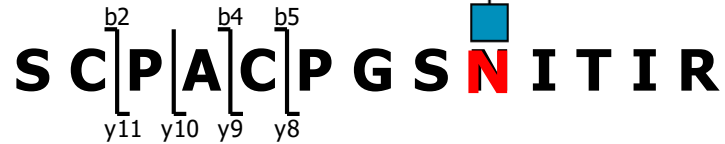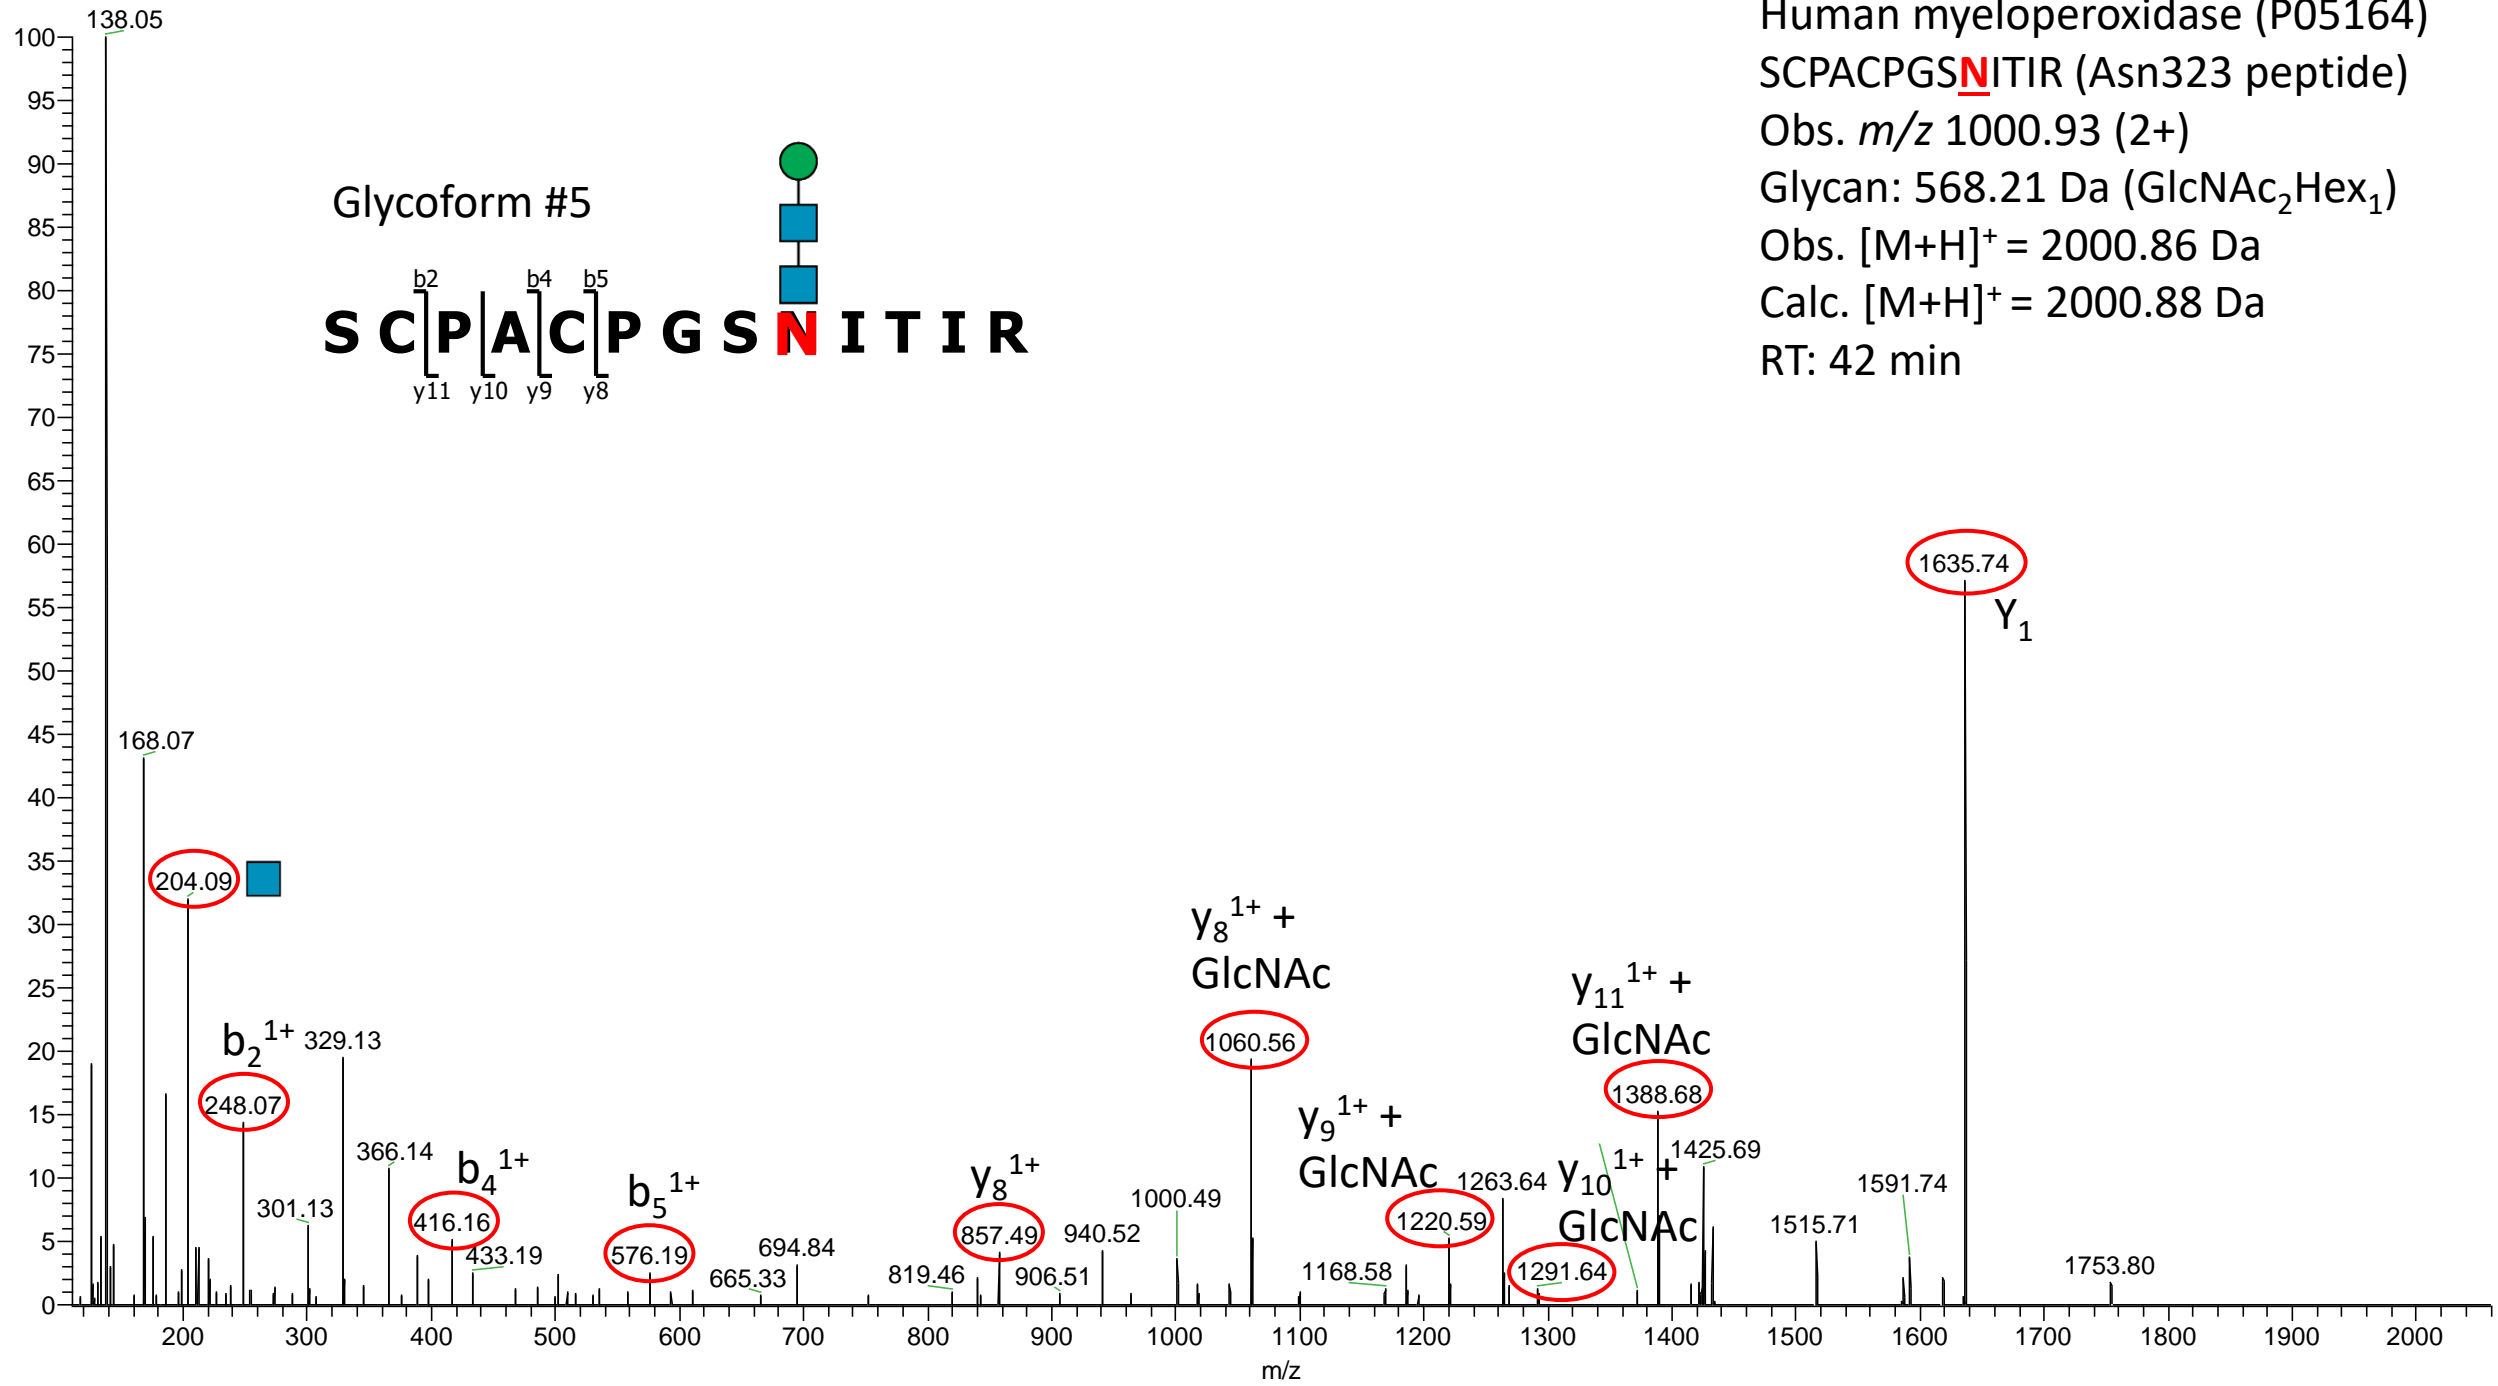

Human myeloperoxidase (P05164)  
SCPACPGS**N**ITIR (Asn323 peptide)  
Obs.  $m/z$  1073.97 (2+)  
Glycan: 714.27 Da (GlcNAc<sub>2</sub>Hex<sub>1</sub>Fuc<sub>1</sub>)  
Obs.  $[M+H]^+$  = 2146.94 Da  
Calc.  $[M+H]^+$  = 2146.94 Da  
RT: 42 min

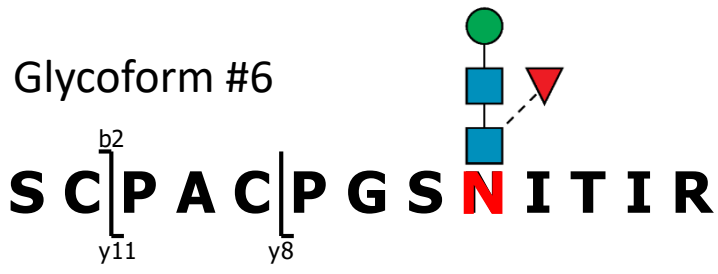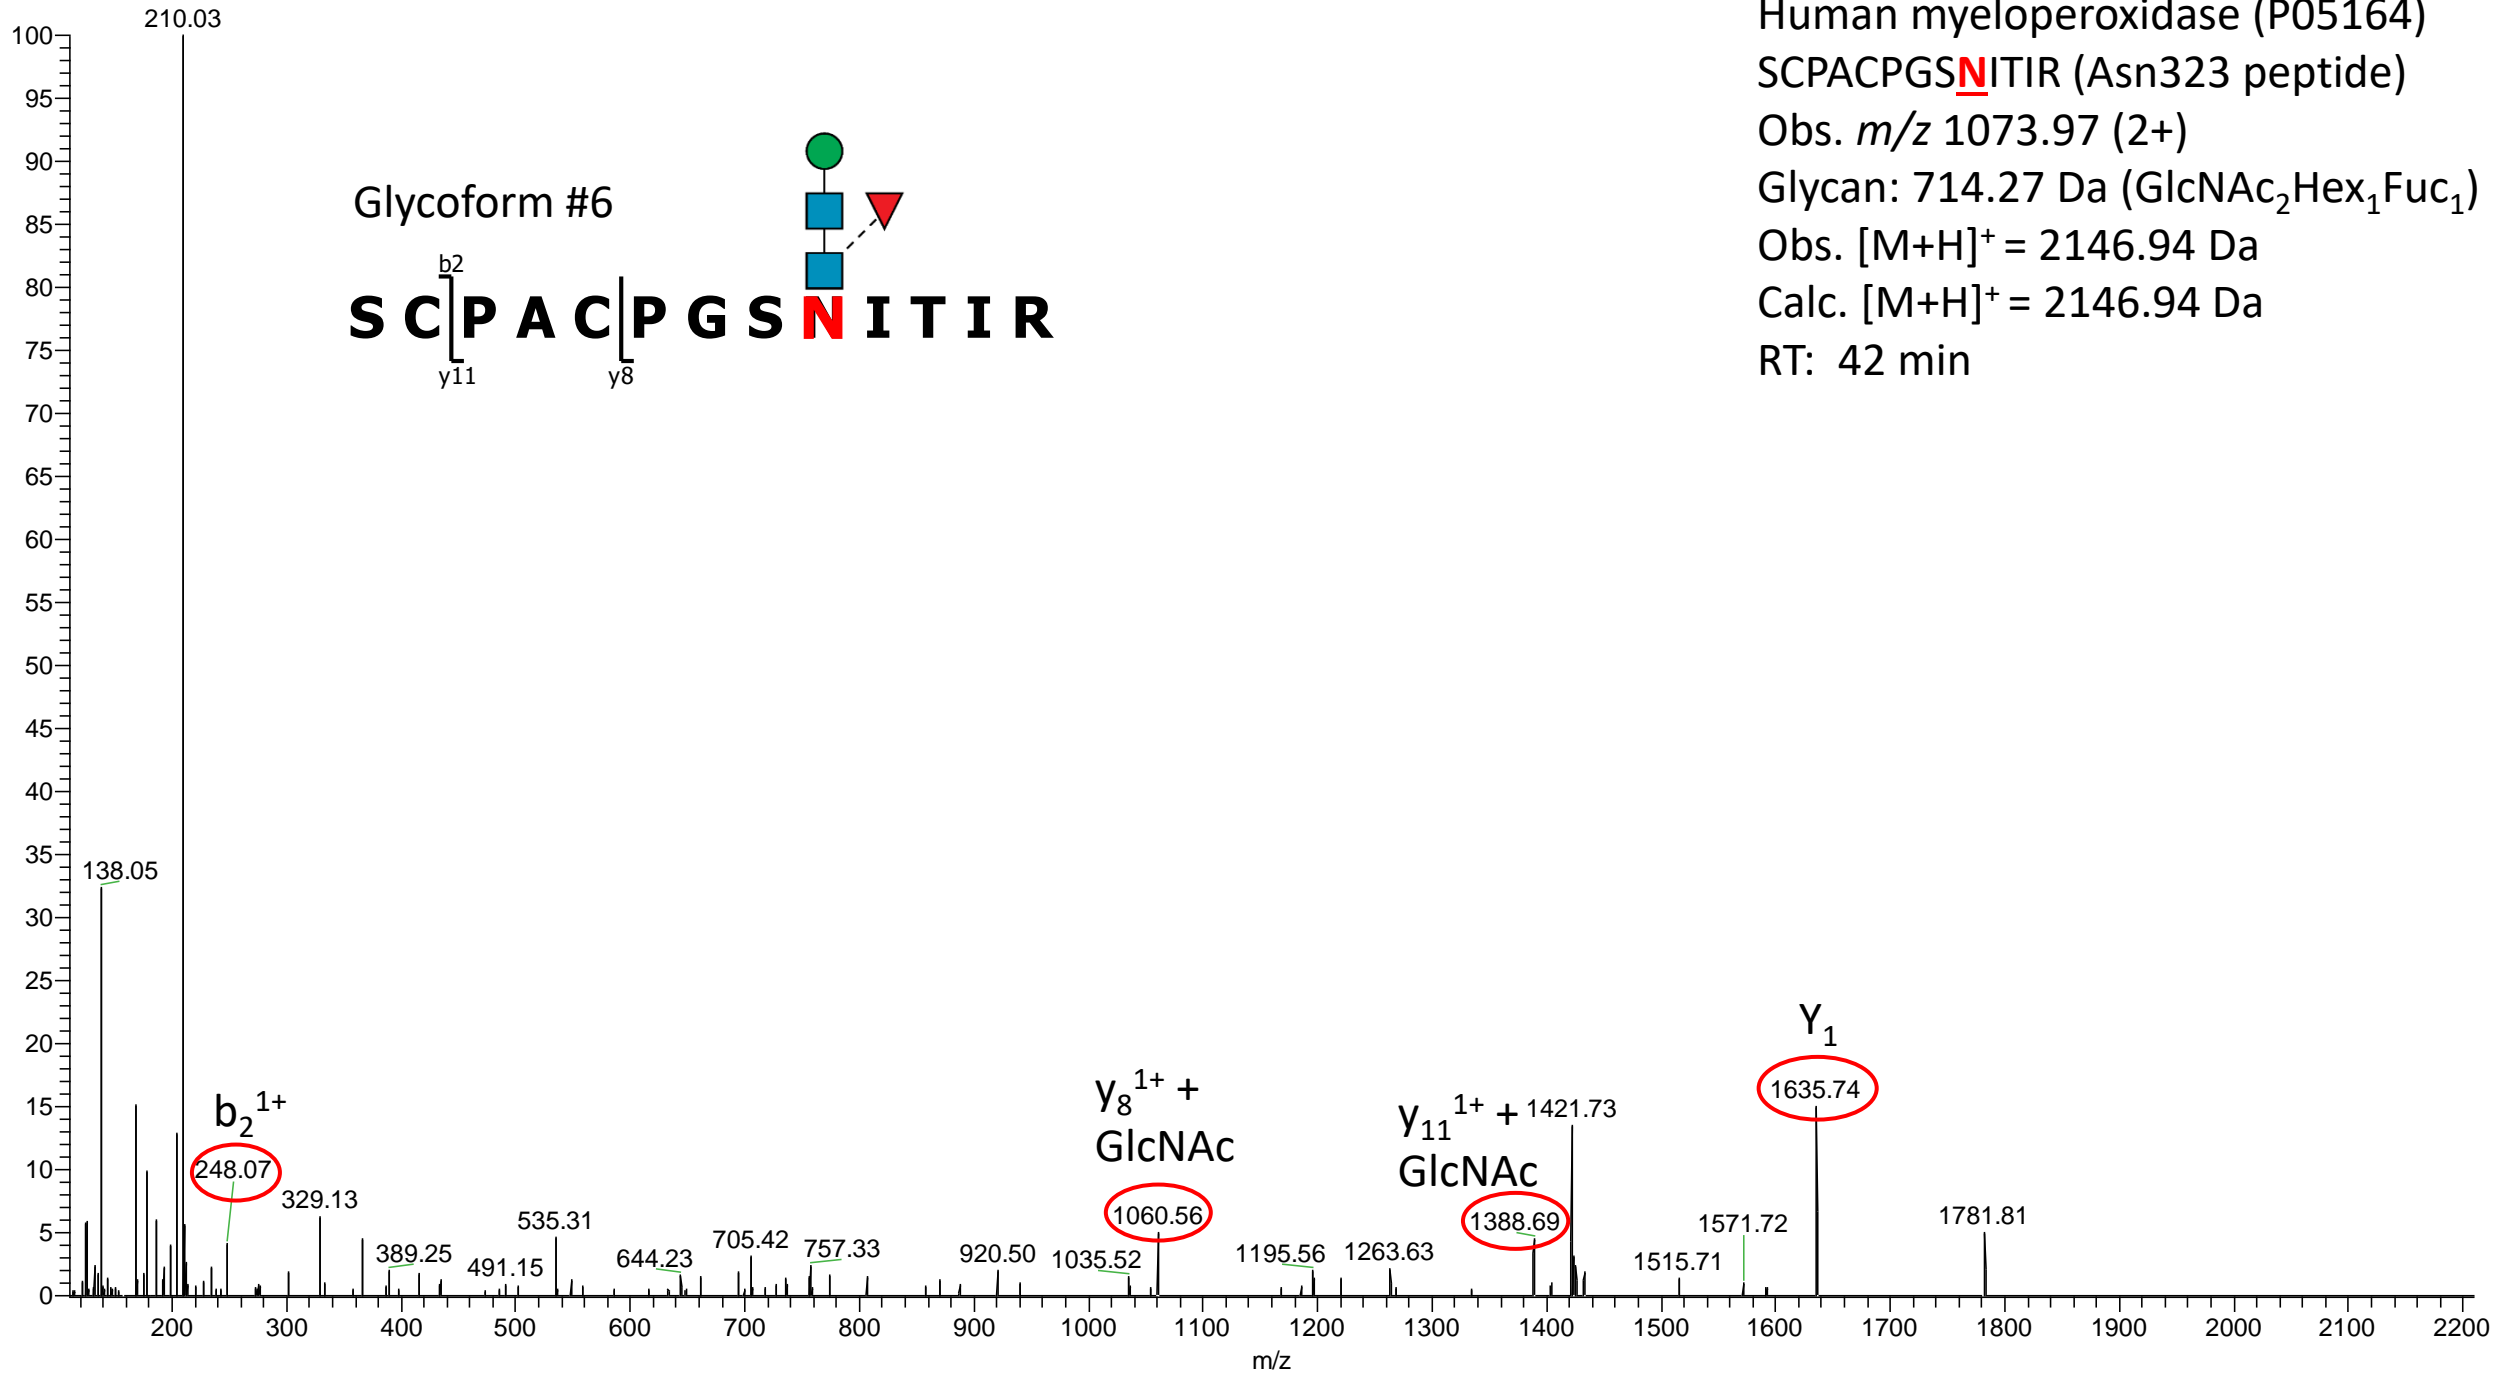



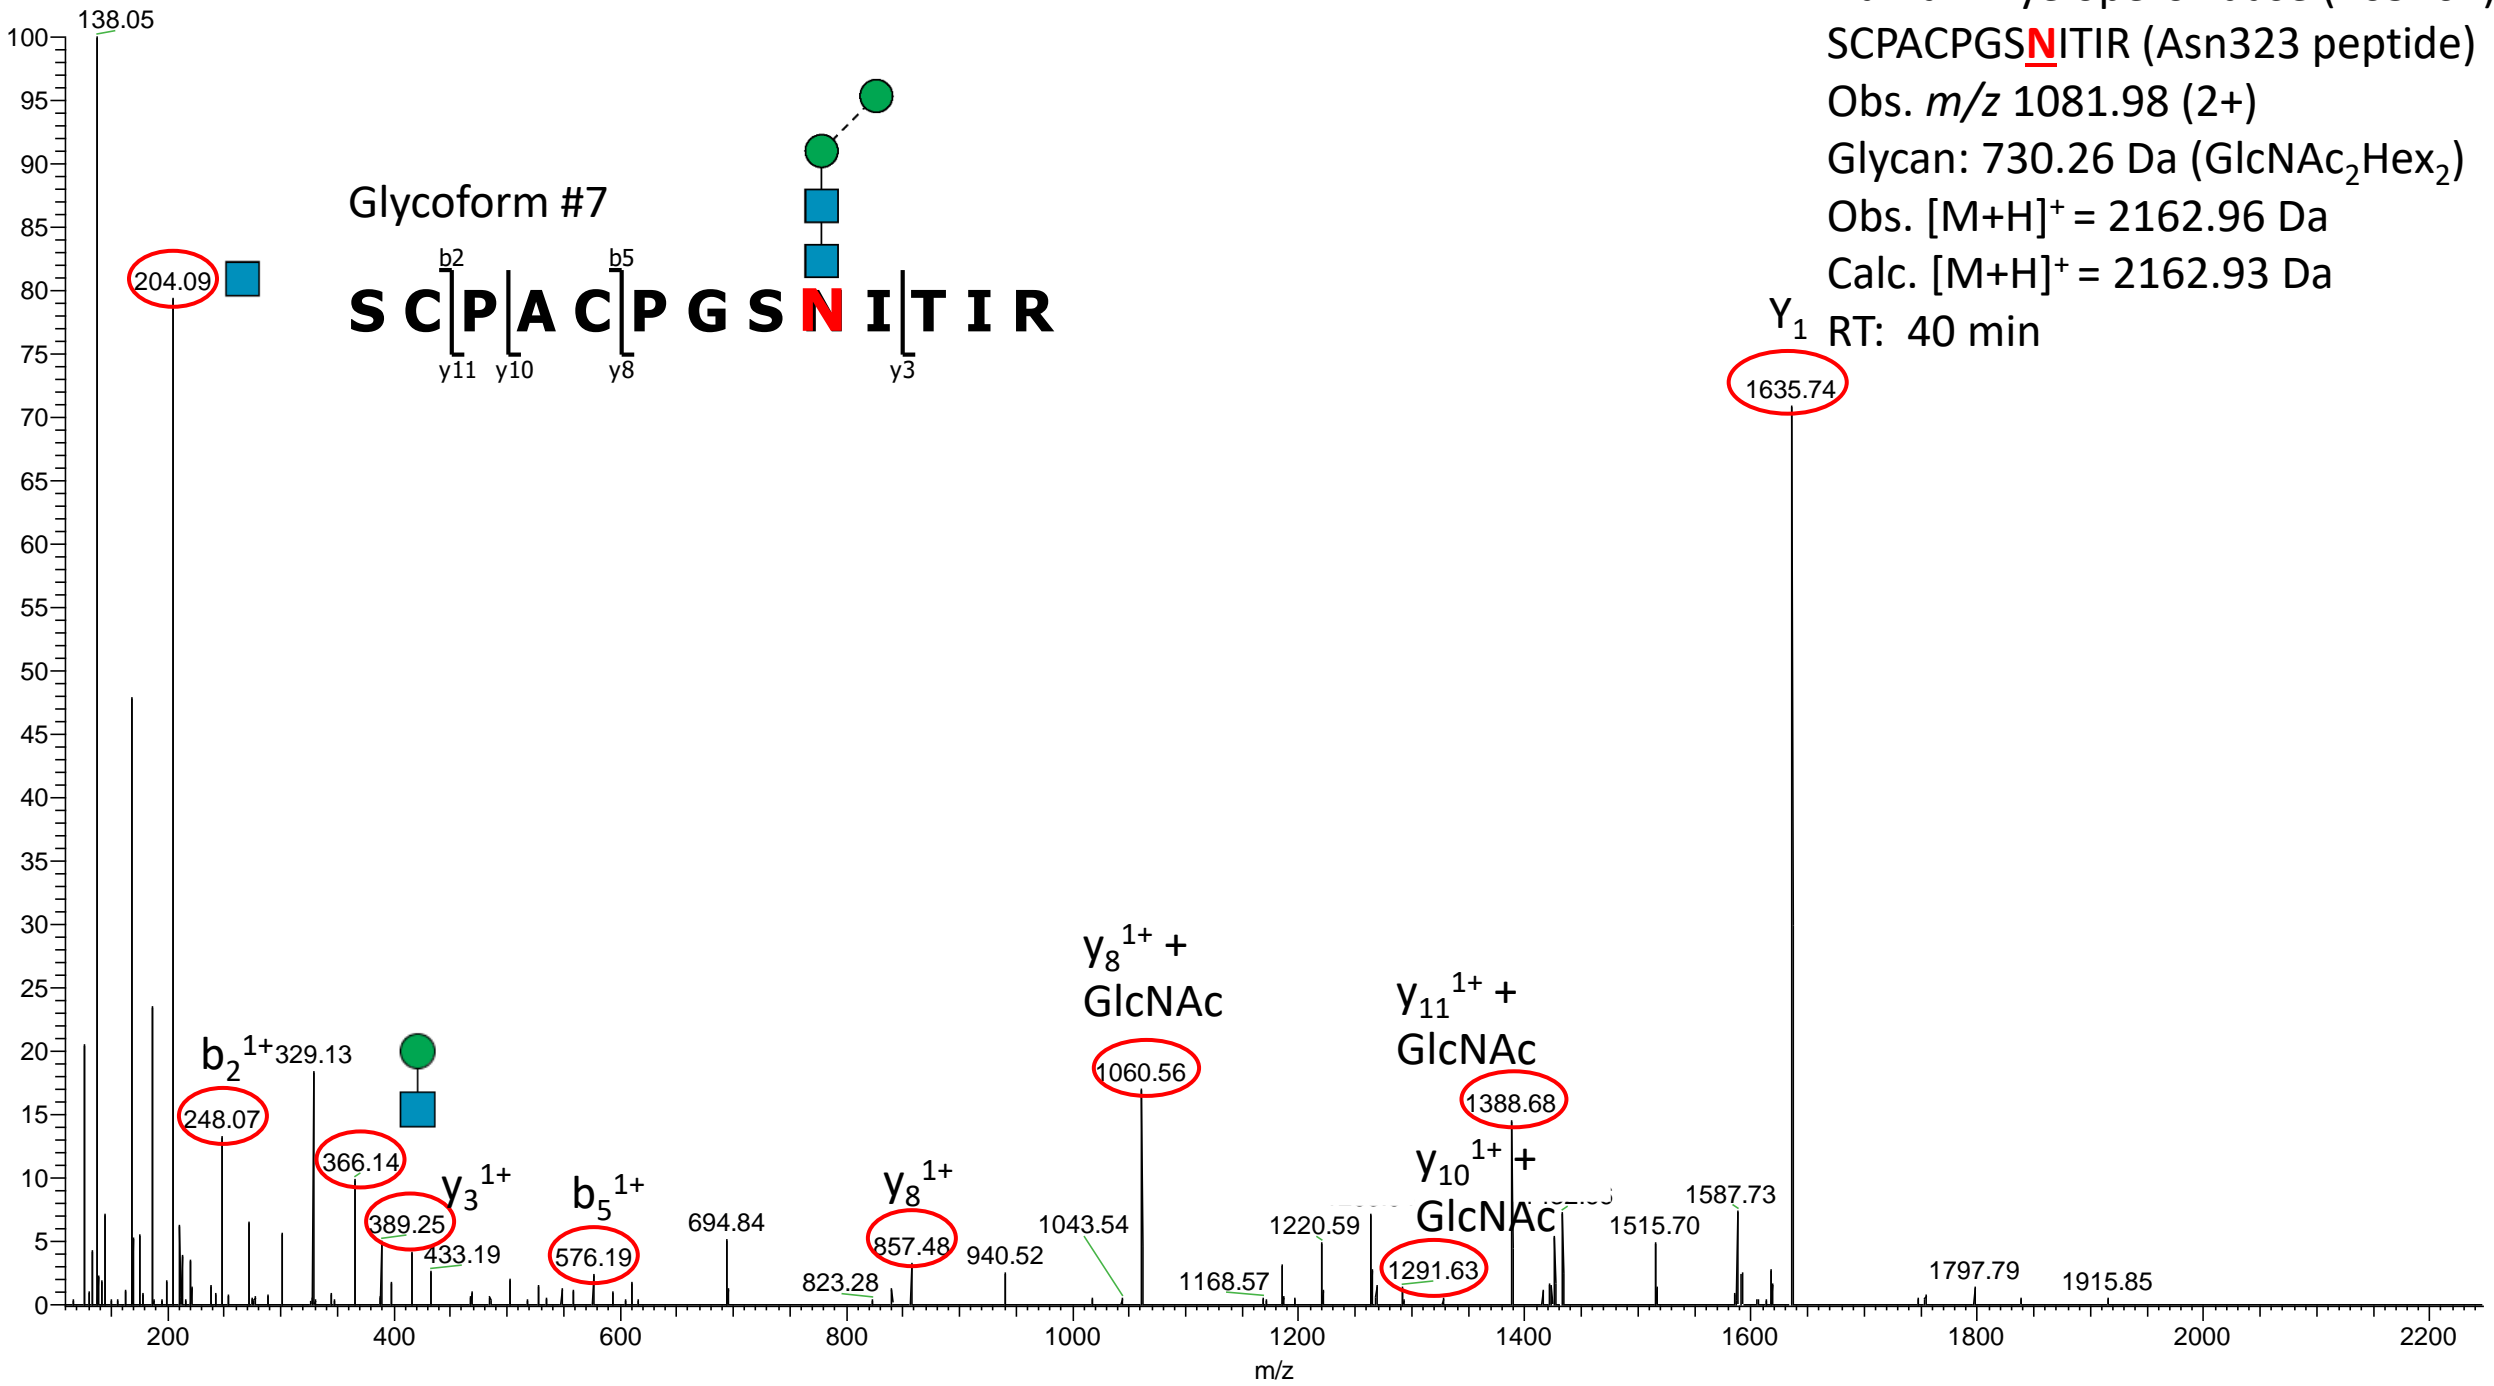

Human myeloperoxidase (P05164)  
 SCPACPGS**N**ITIR (Asn323 peptide)  
 Obs.  $m/z$  1155.49 (2+)  
 Glycan: 876.32 Da (GlcNac<sub>2</sub>Hex<sub>2</sub>Fuc<sub>1</sub>)  
 Obs.  $[M+H]^+$  = 2308.98 Da  
 Calc.  $[M+H]^+$  = 2308.99 Da  
 RT: 42 min

Glycoform #8

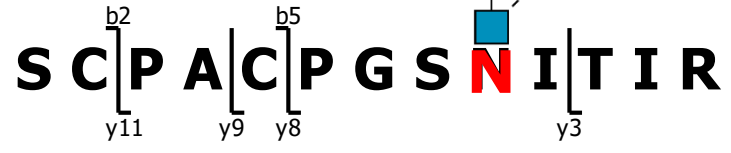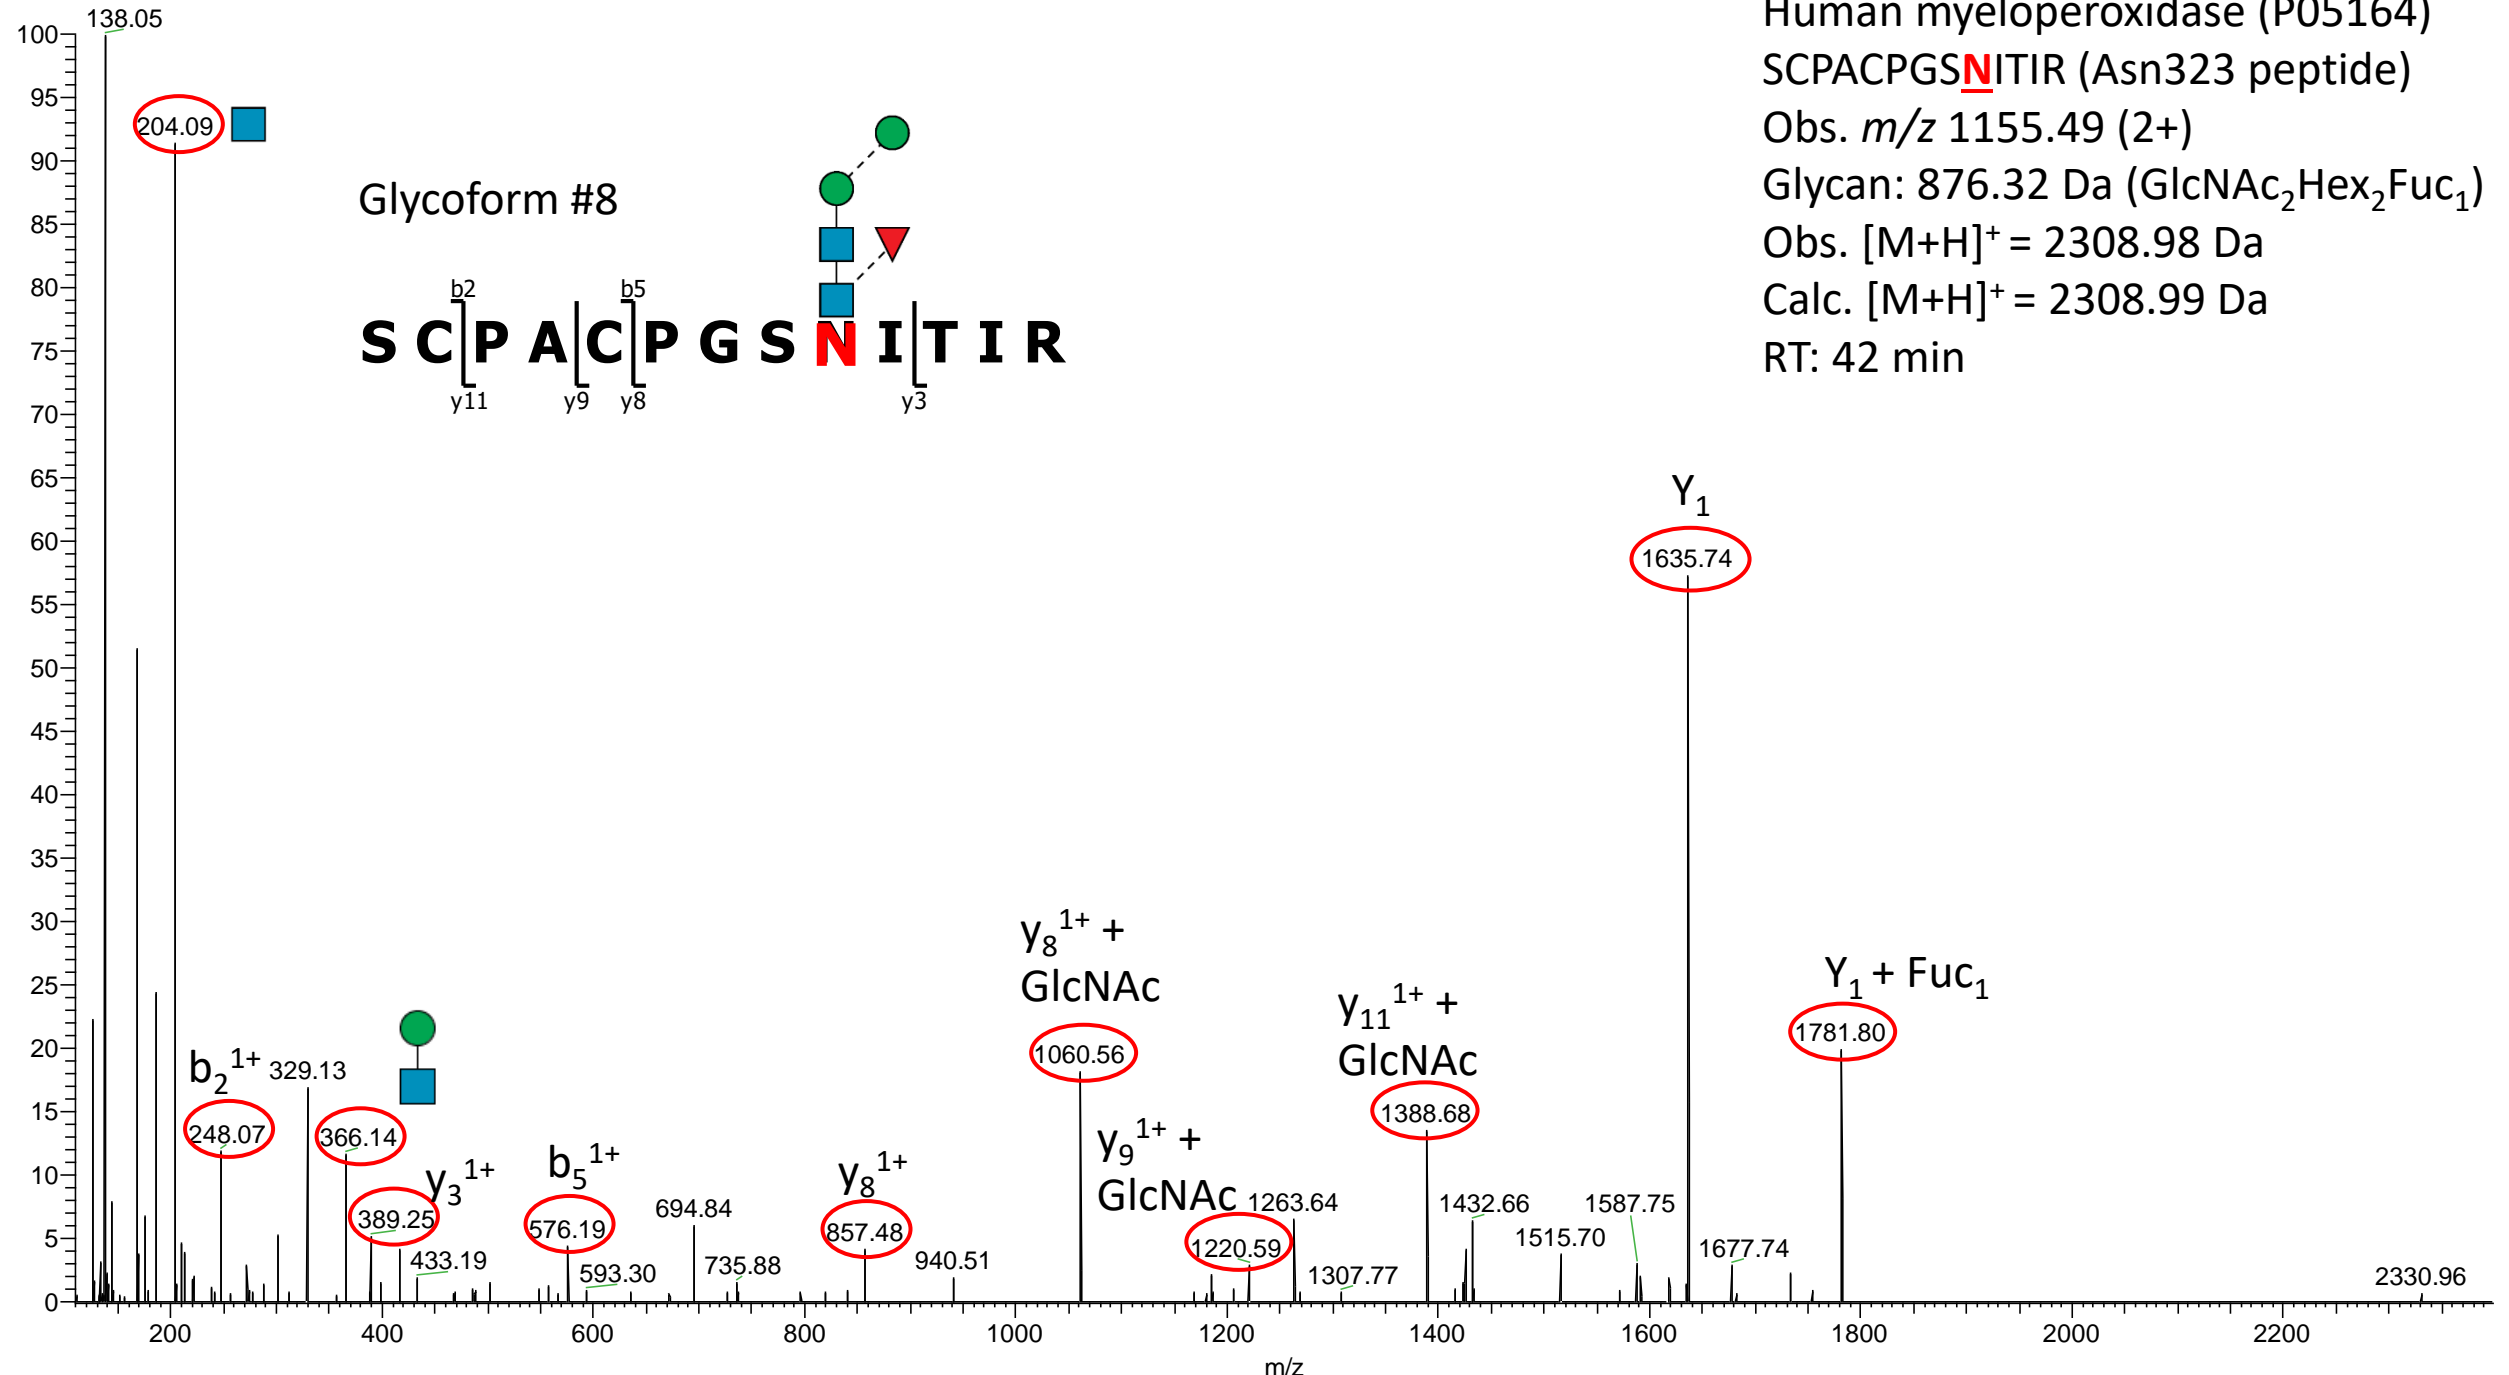

Human myeloperoxidase (P05164)  
SCPACPGS**N**ITIR (Asn323 peptide)  
Obs.  $m/z$  775.64 (3+)  
Glycan: 892.3172 Da (GlcNAc<sub>2</sub>Hex<sub>3</sub>)  
Obs.  $[M+H]^+$  = 2324.92 Da  
Calc.  $[M+H]^+$  = 2324.98 Da  
RT: 39 min

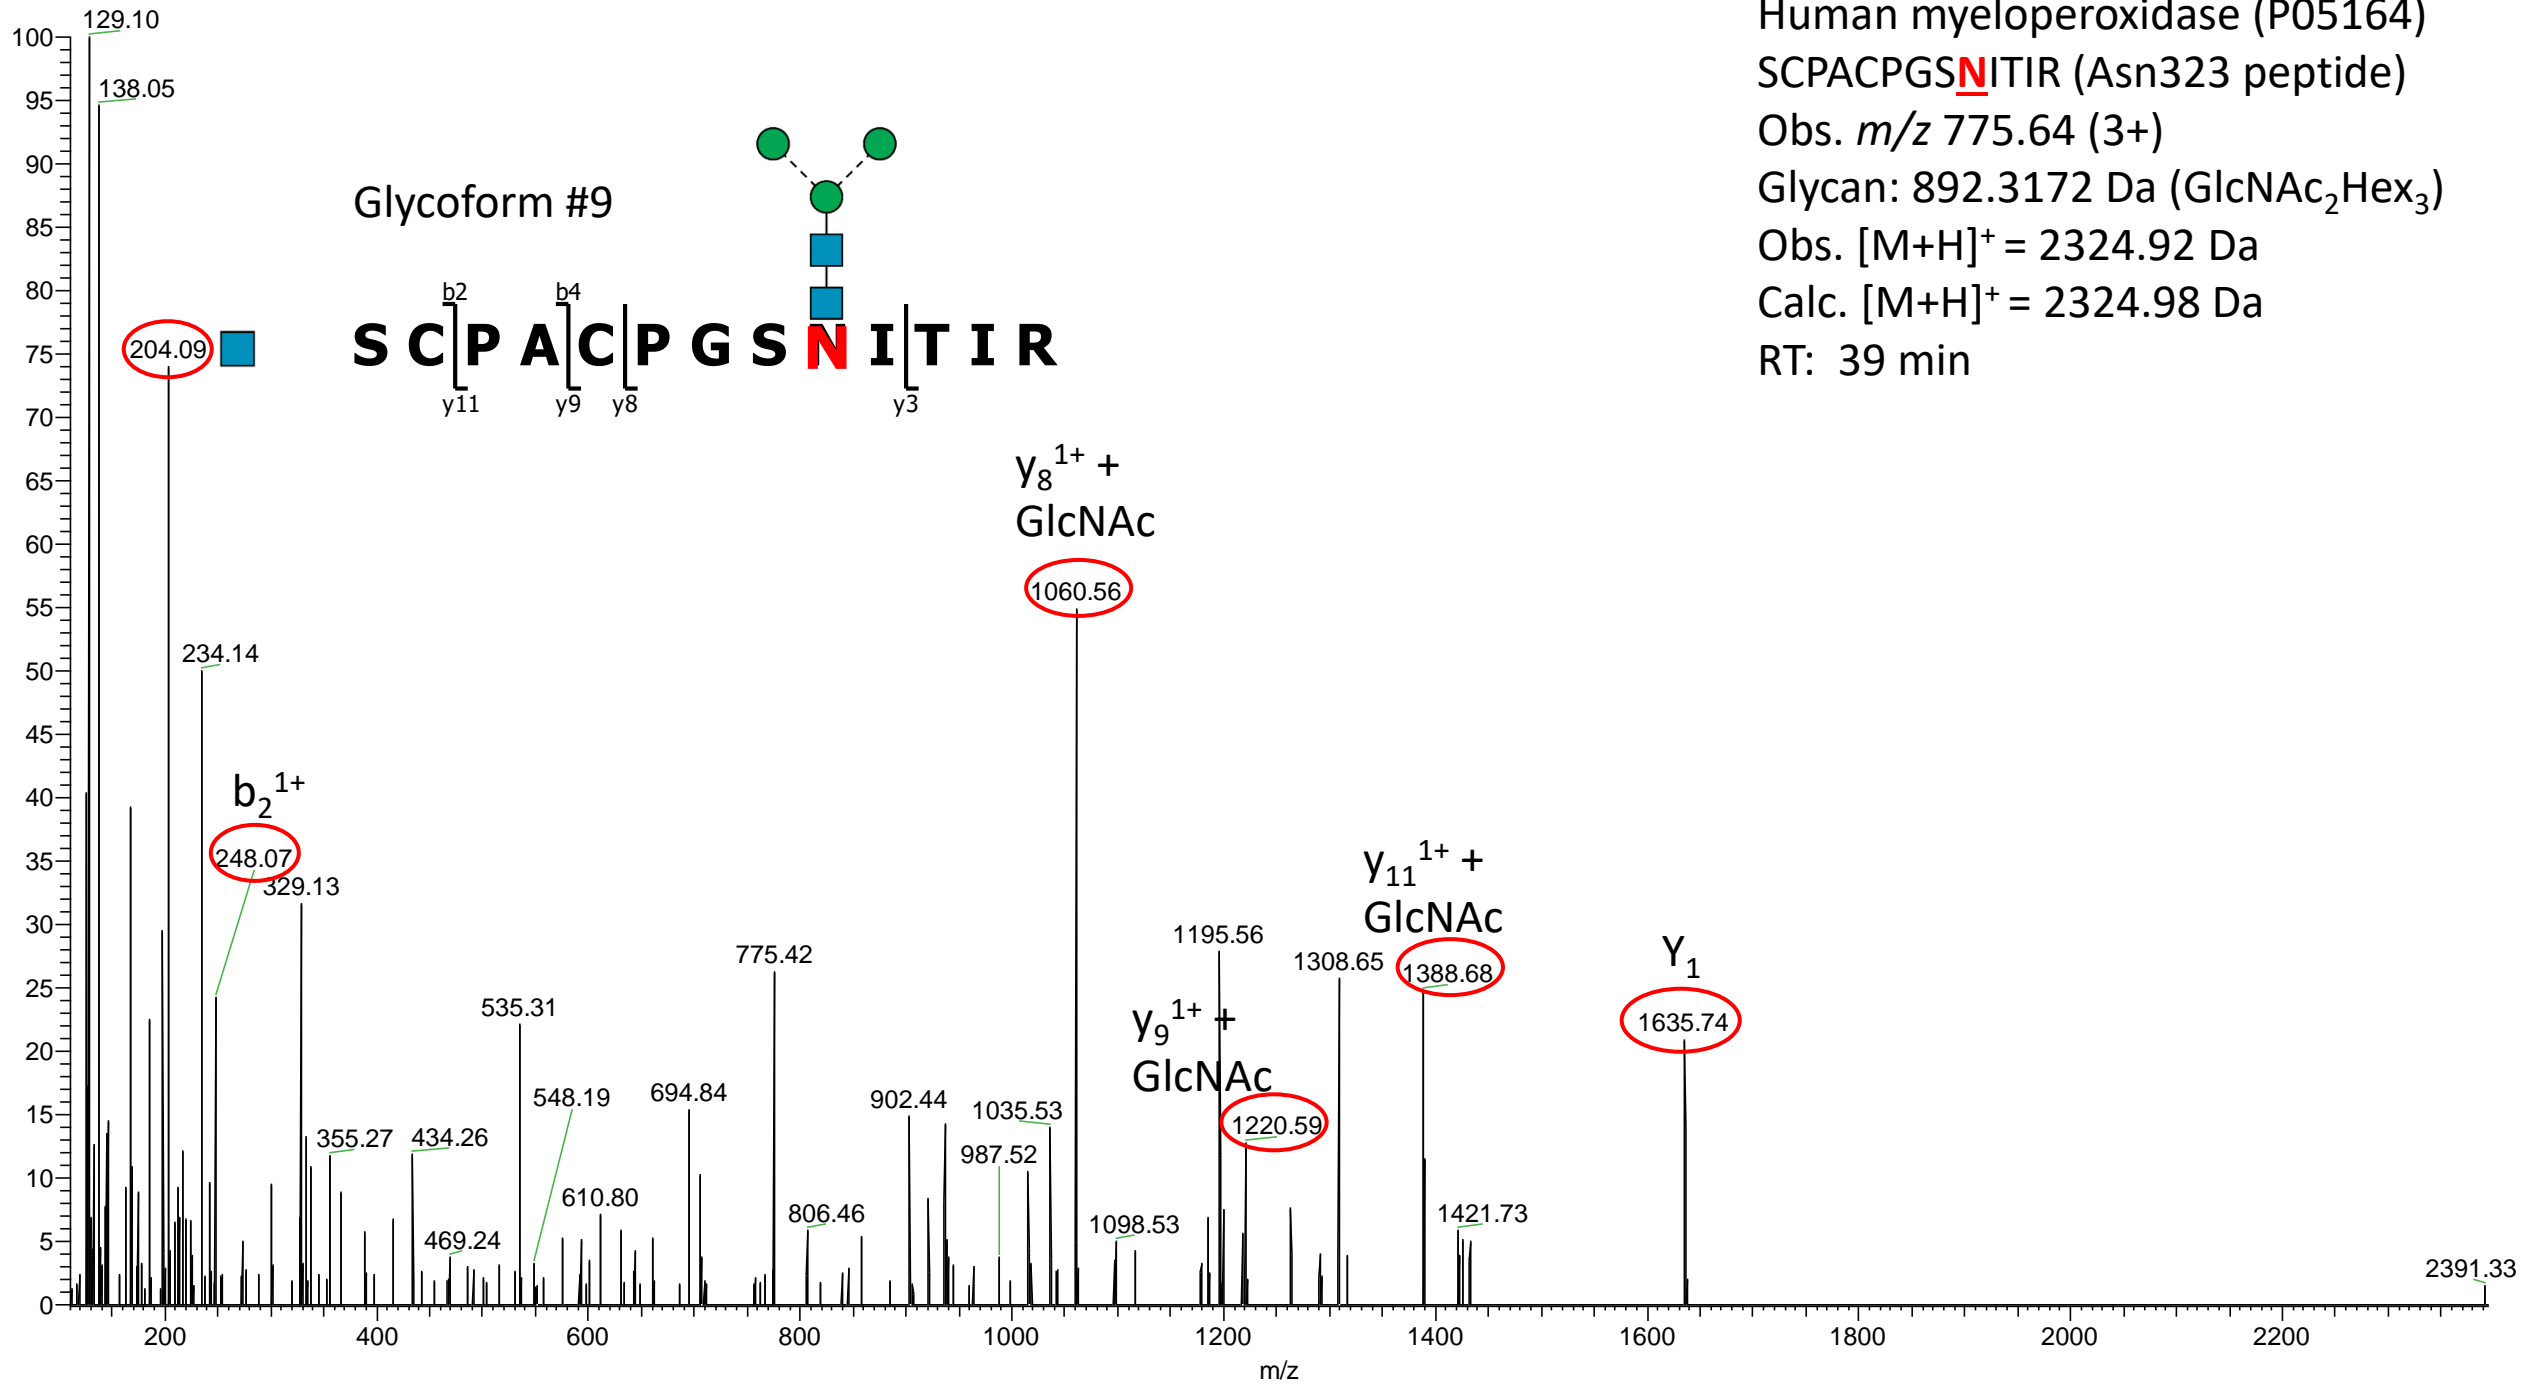

Human myeloperoxidase (P05164)  
 SCPACPGS**N**ITIR (Asn323 peptide)  
 Obs.  $m/z$  1236.03 (2+)  
 Glycan: 1038.38 Da (GlcNAc<sub>2</sub>Hex<sub>3</sub>Fuc<sub>1</sub>)  
 Obs.  $[M+H]^+$  = 2471.06 Da  
 Calc.  $[M+H]^+$  = 2471.04 Da  
 RT: 42 min

Glycoform #10

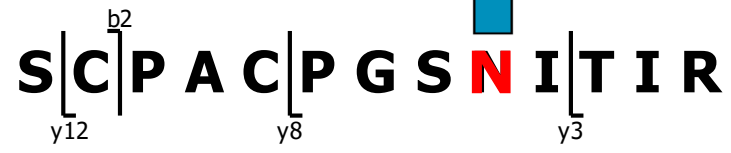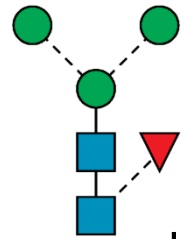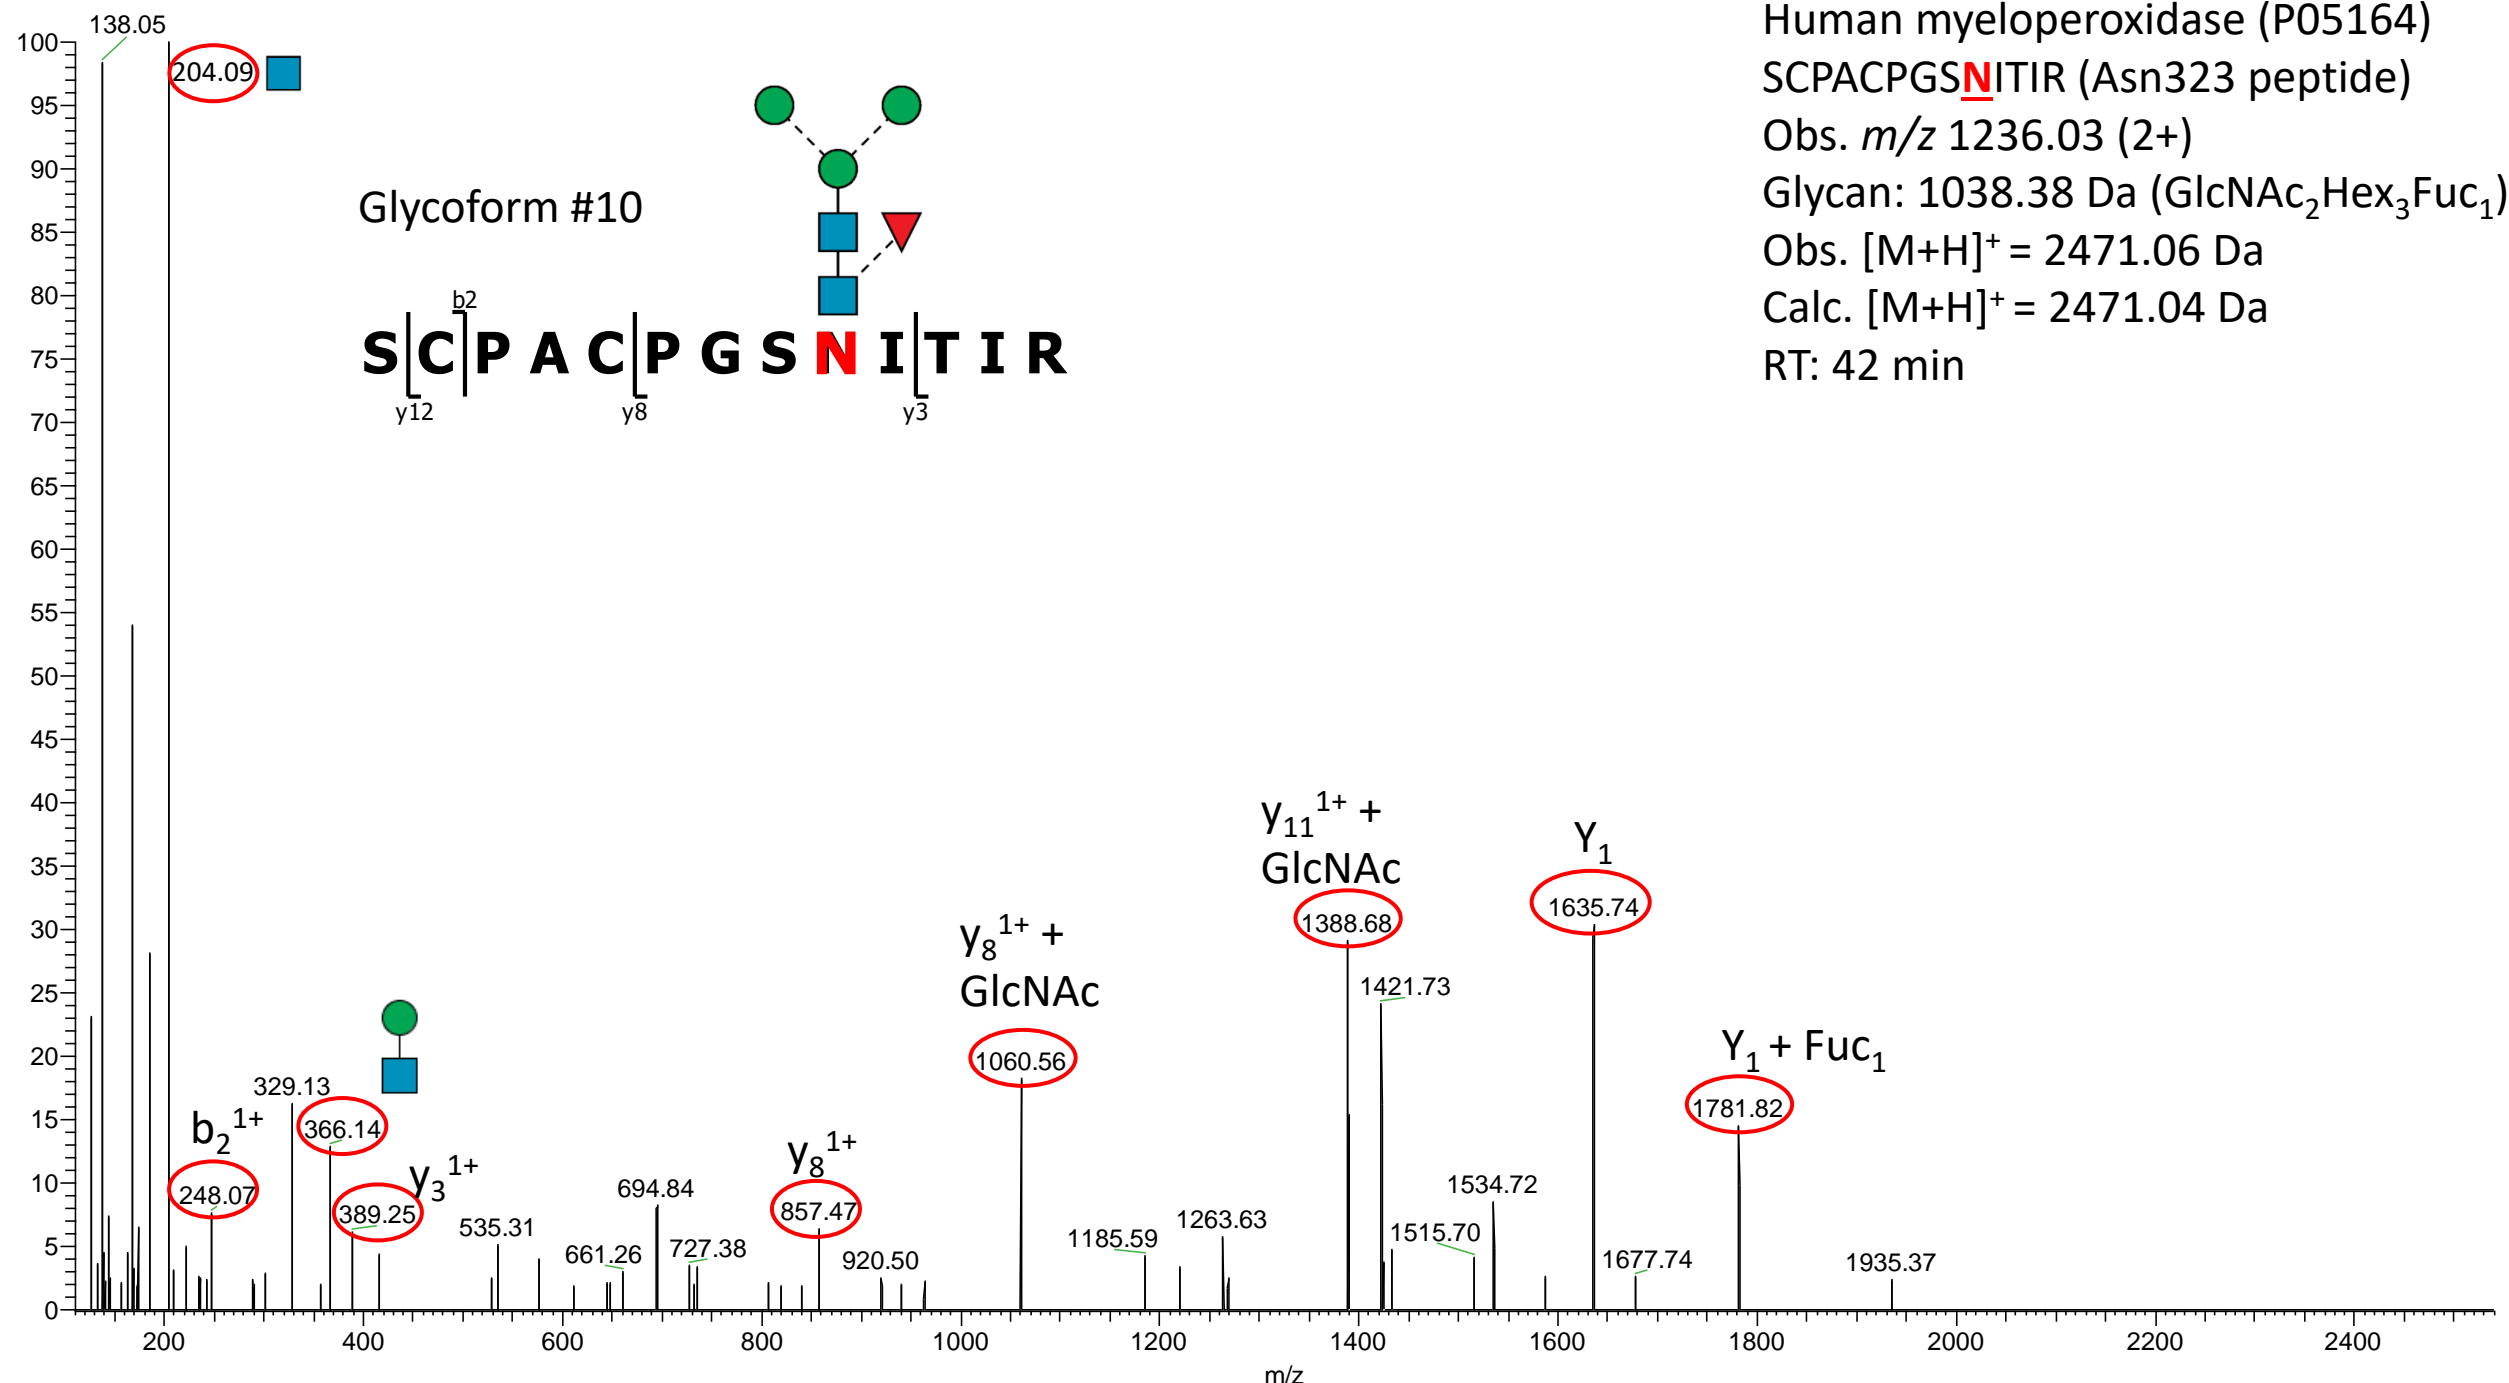

Human myeloperoxidase (P05164)  
SCPACPGS**N**ITIR (Asn323 peptide)  
Obs.  $m/z$  1244.02 (2+)  
Glycan: 1054.37 Da (GlcNAc<sub>2</sub>Hex<sub>4</sub>)  
Obs.  $[M+H]^+$  = 2487.04 Da  
Calc.  $[M+H]^+$  = 2487.04 Da  
RT: 42 min

Glycoform #11

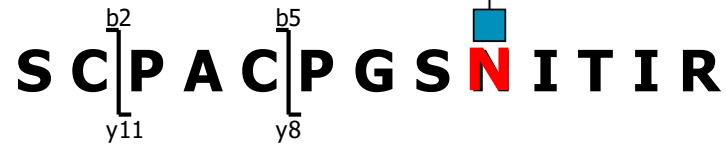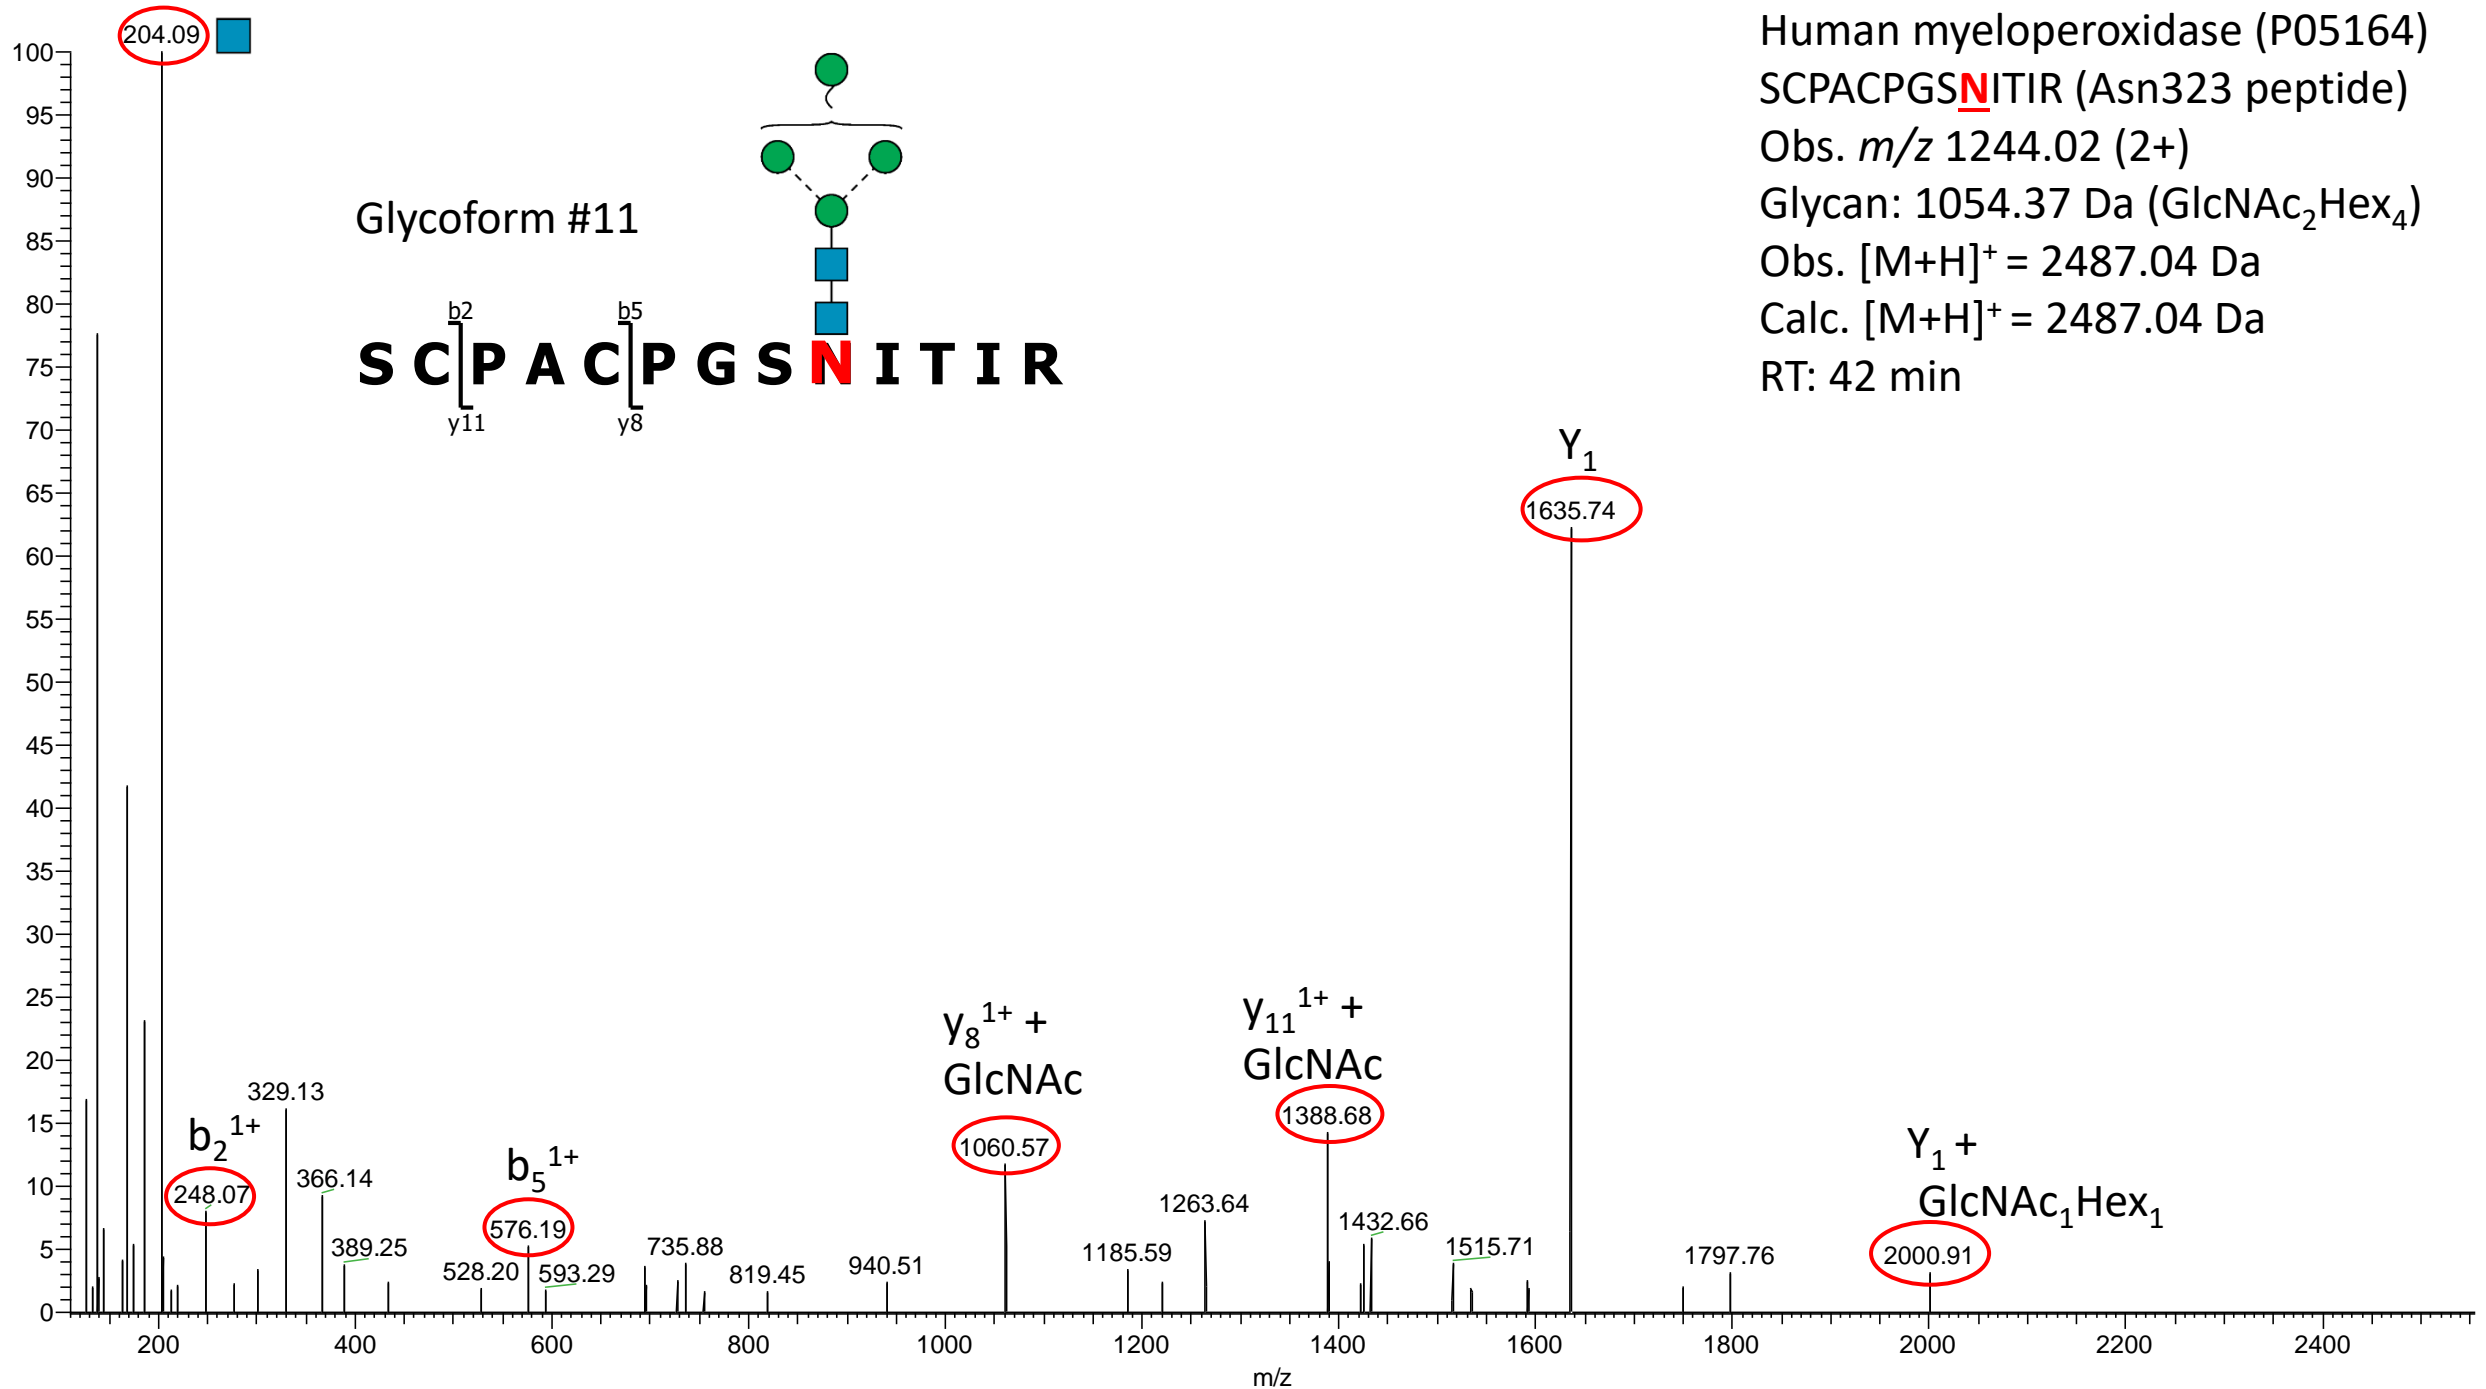

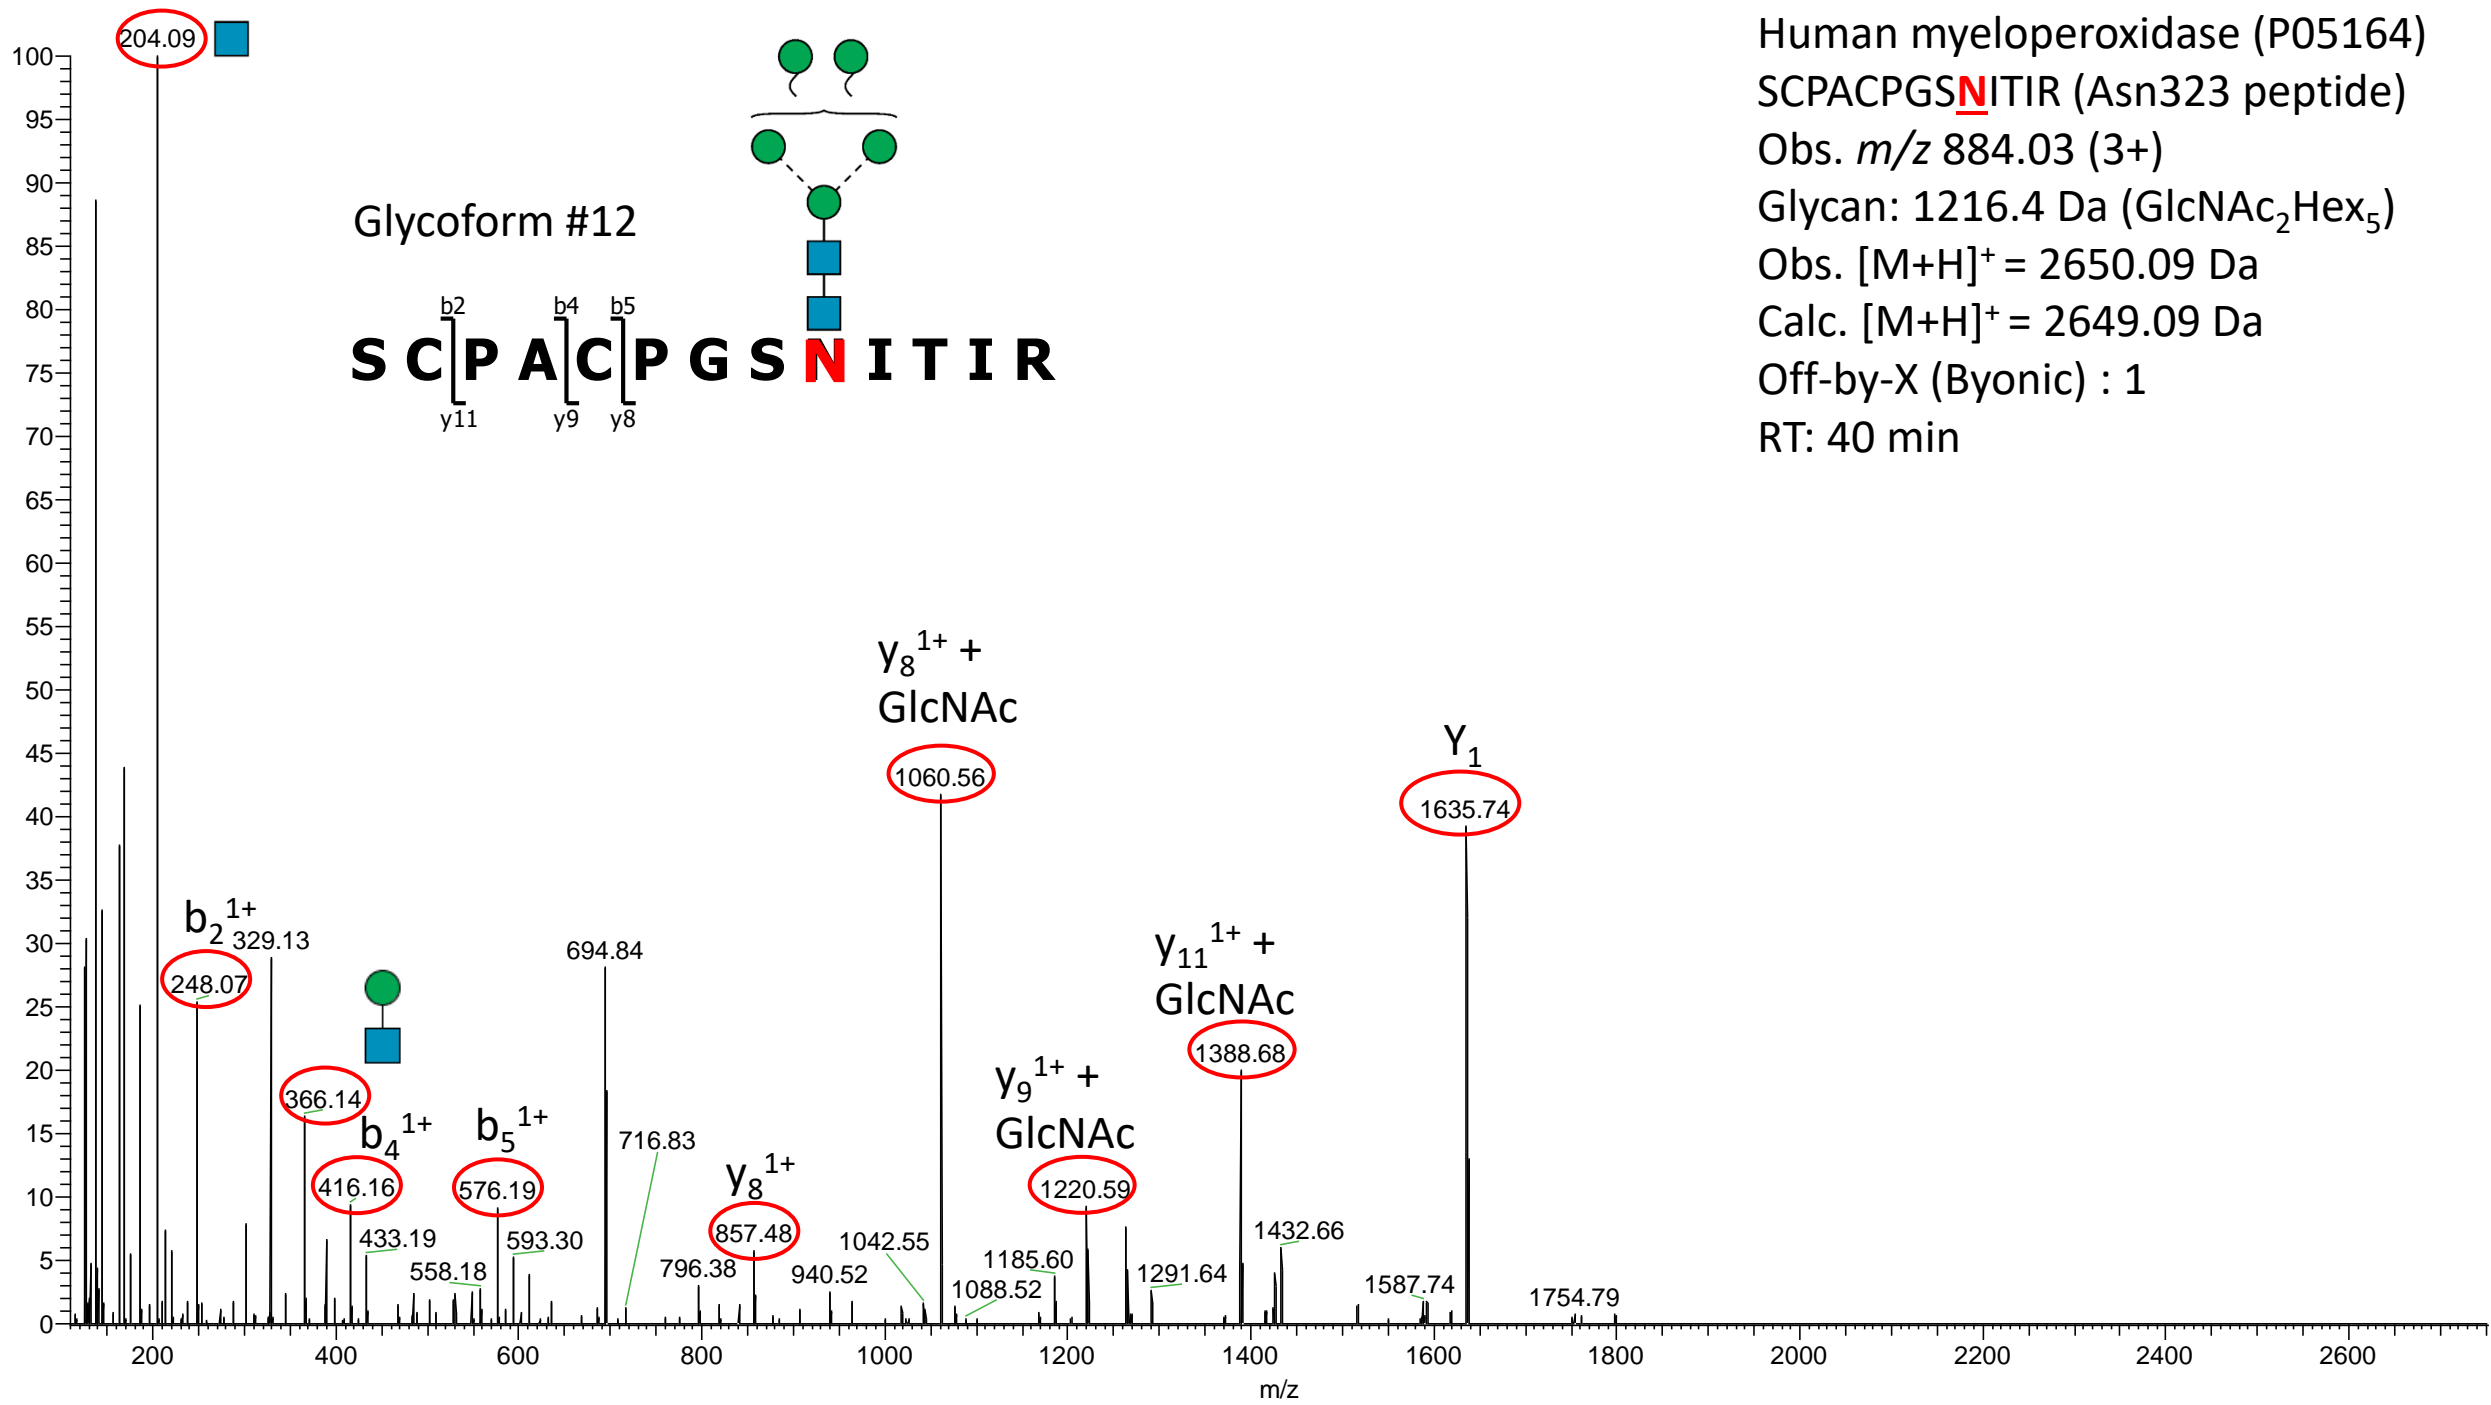

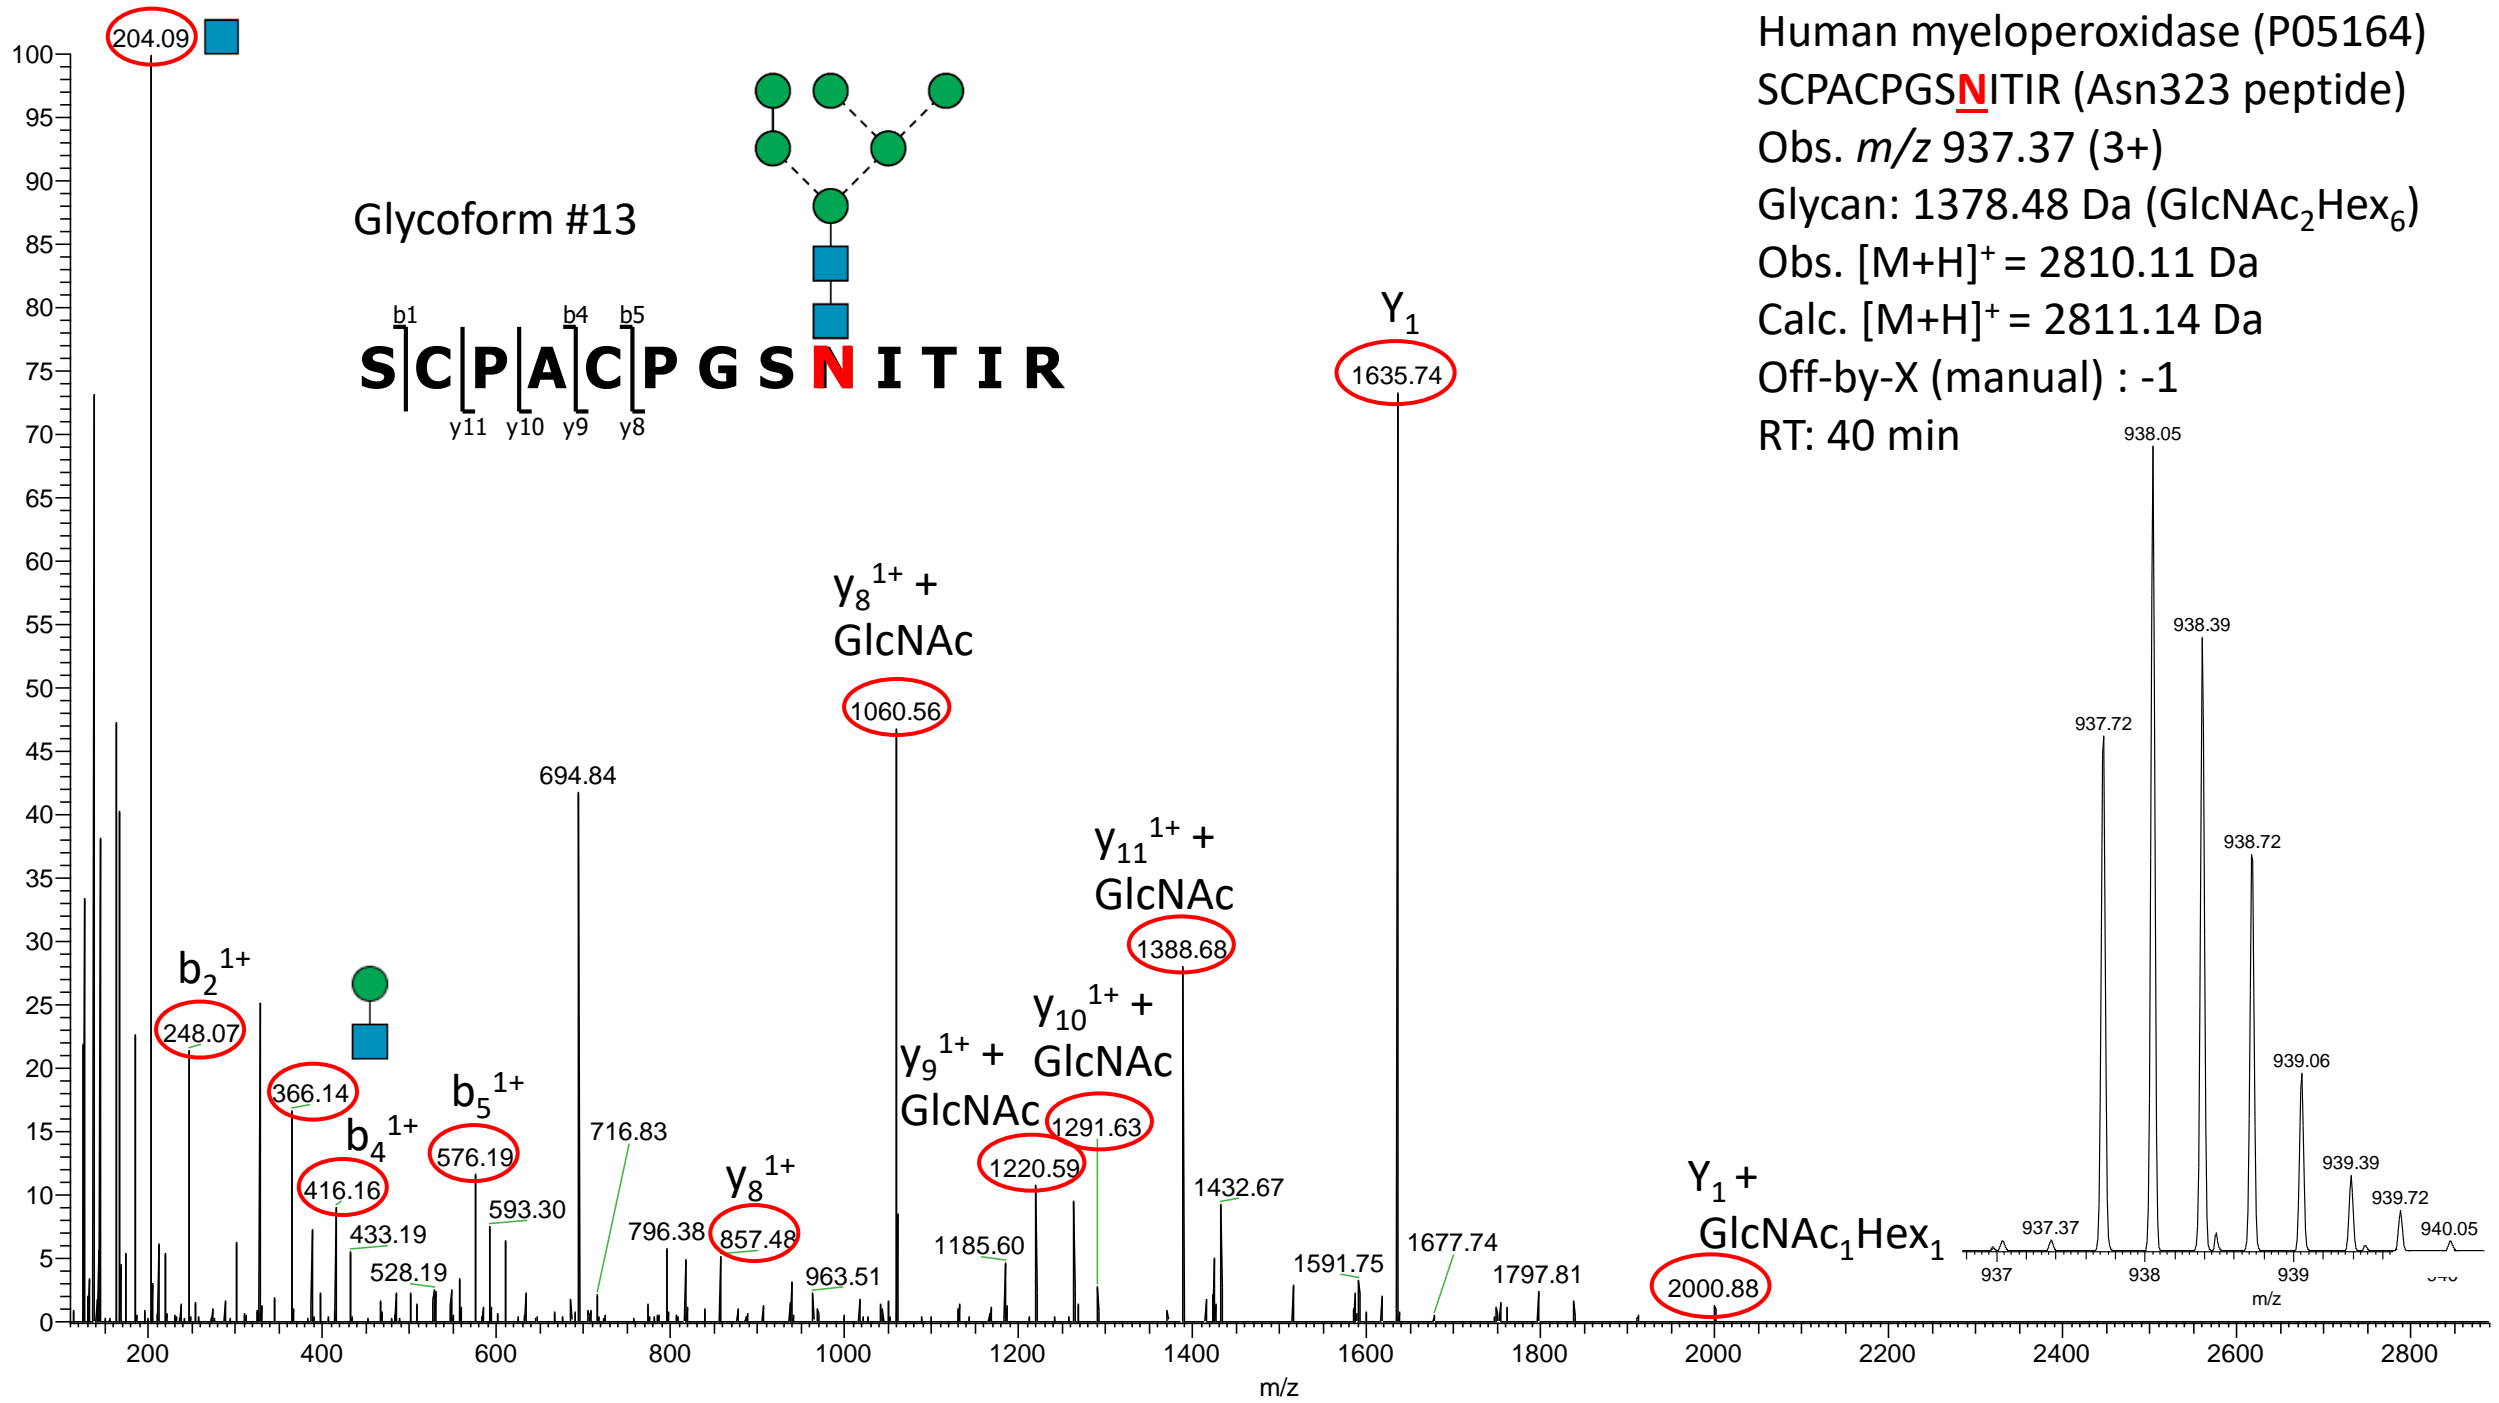

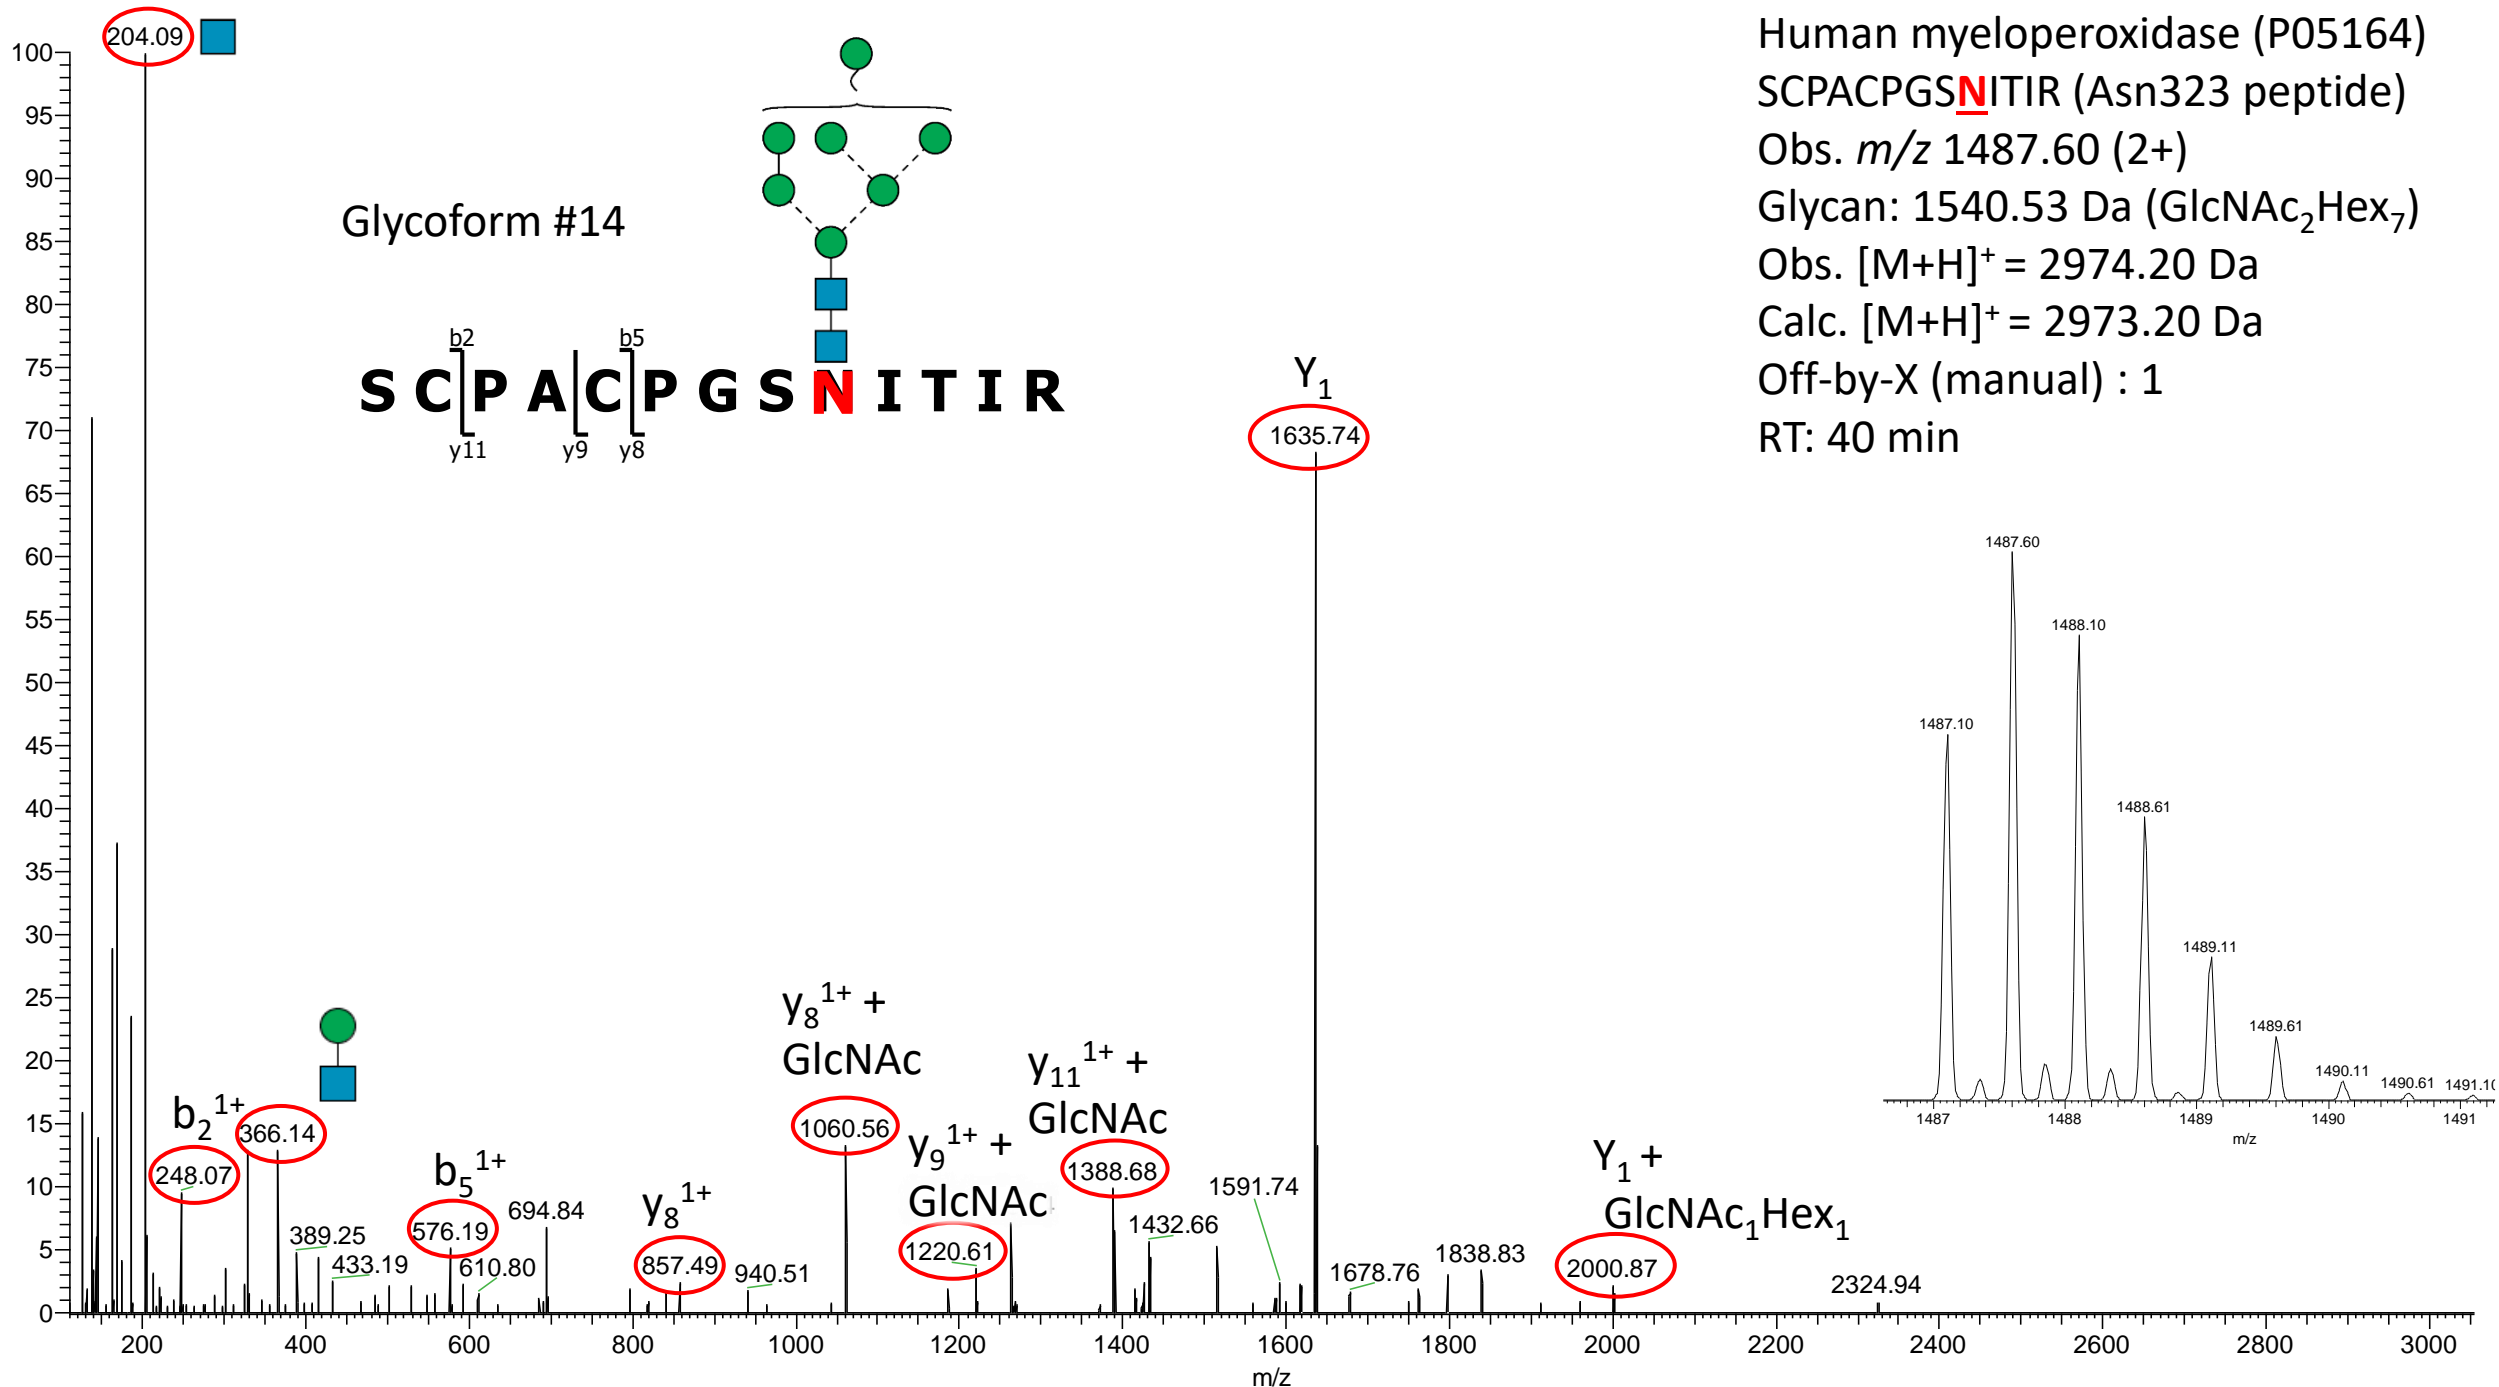



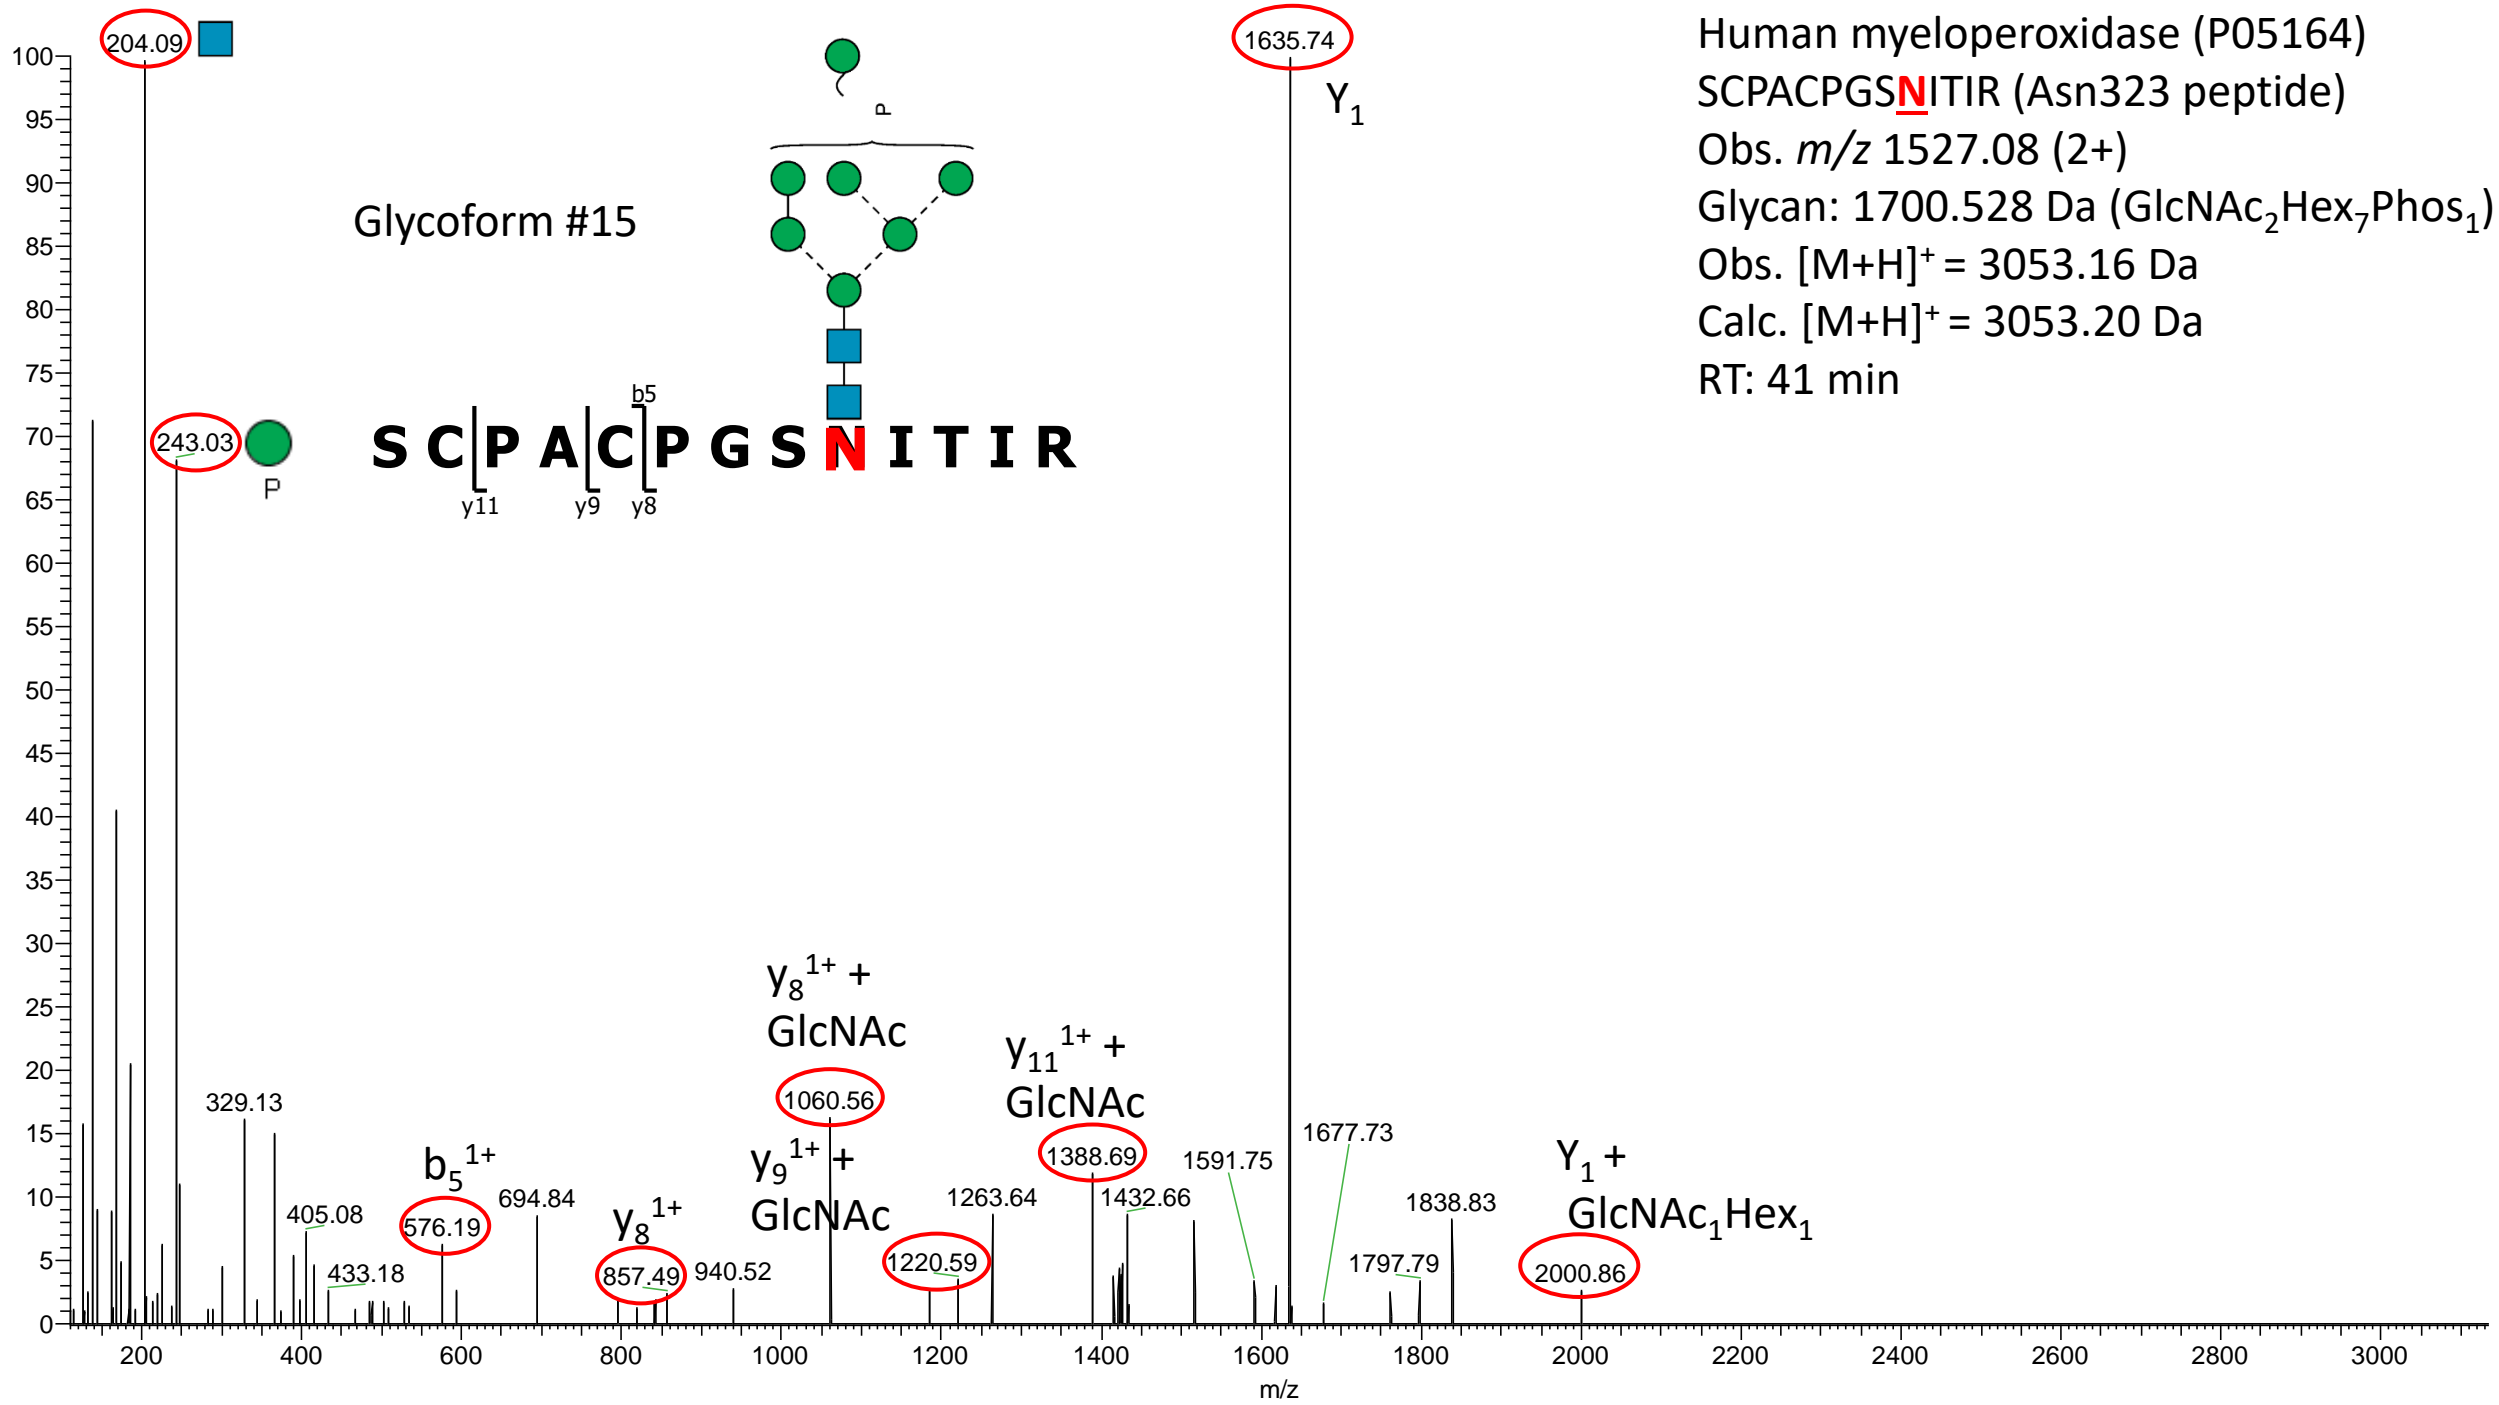

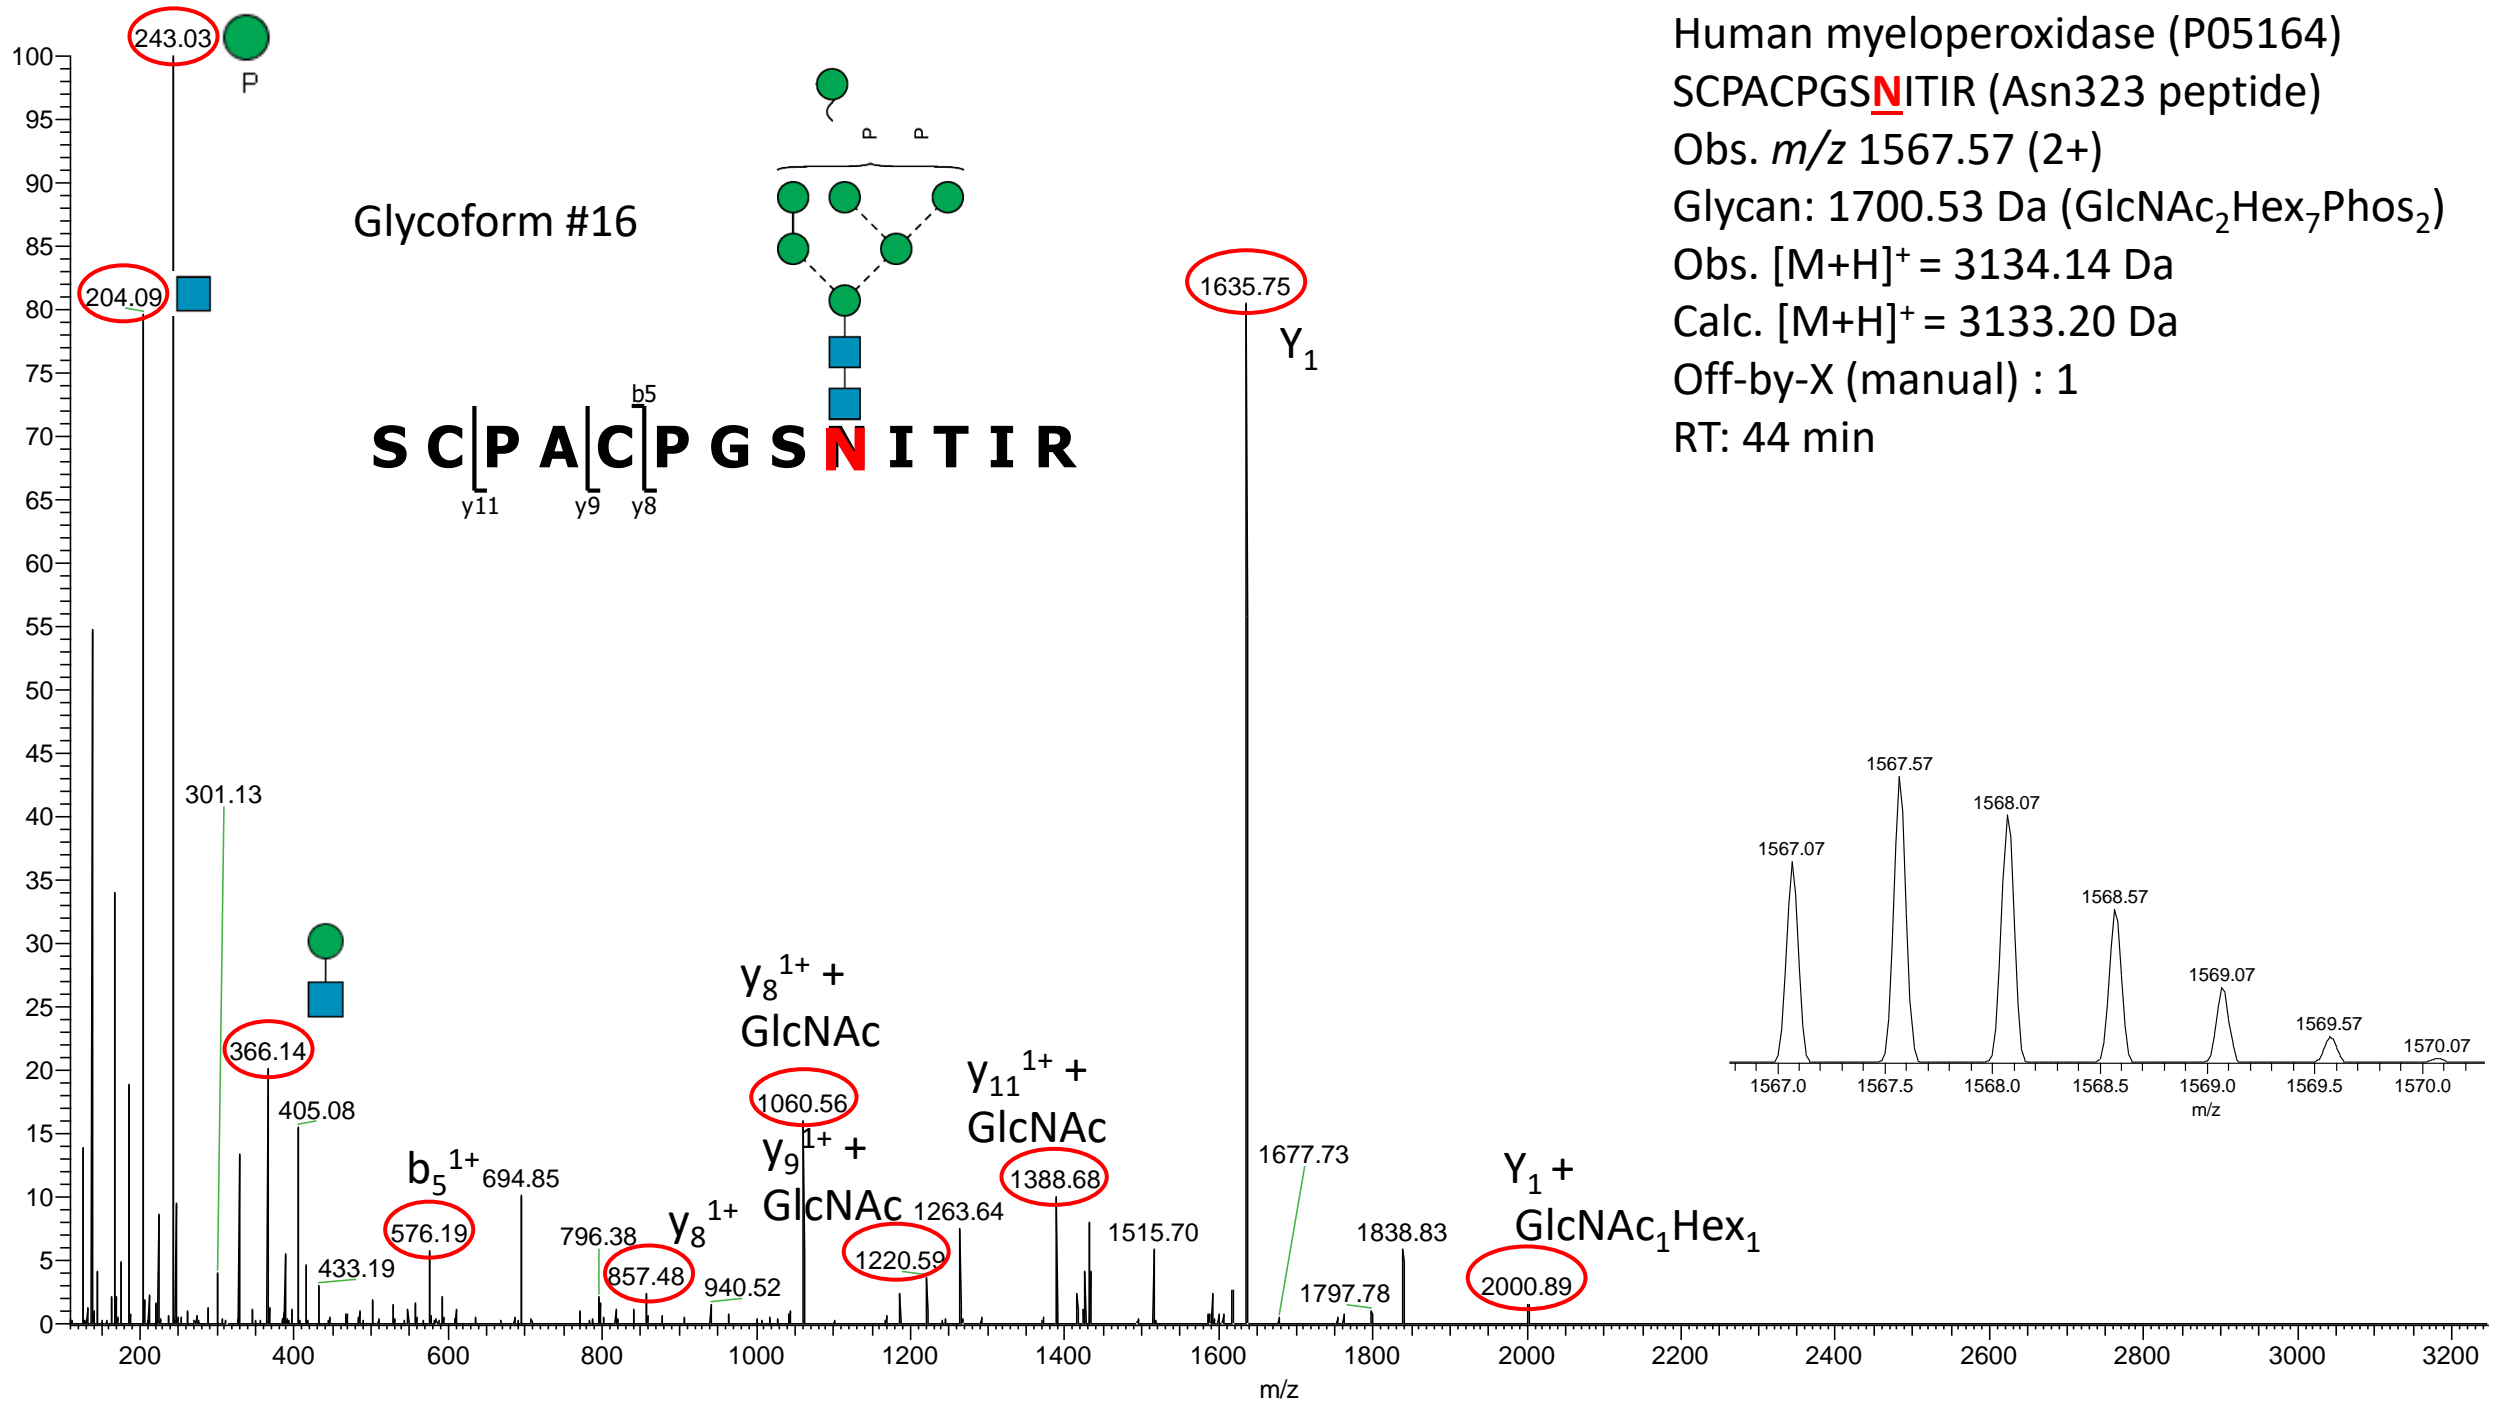

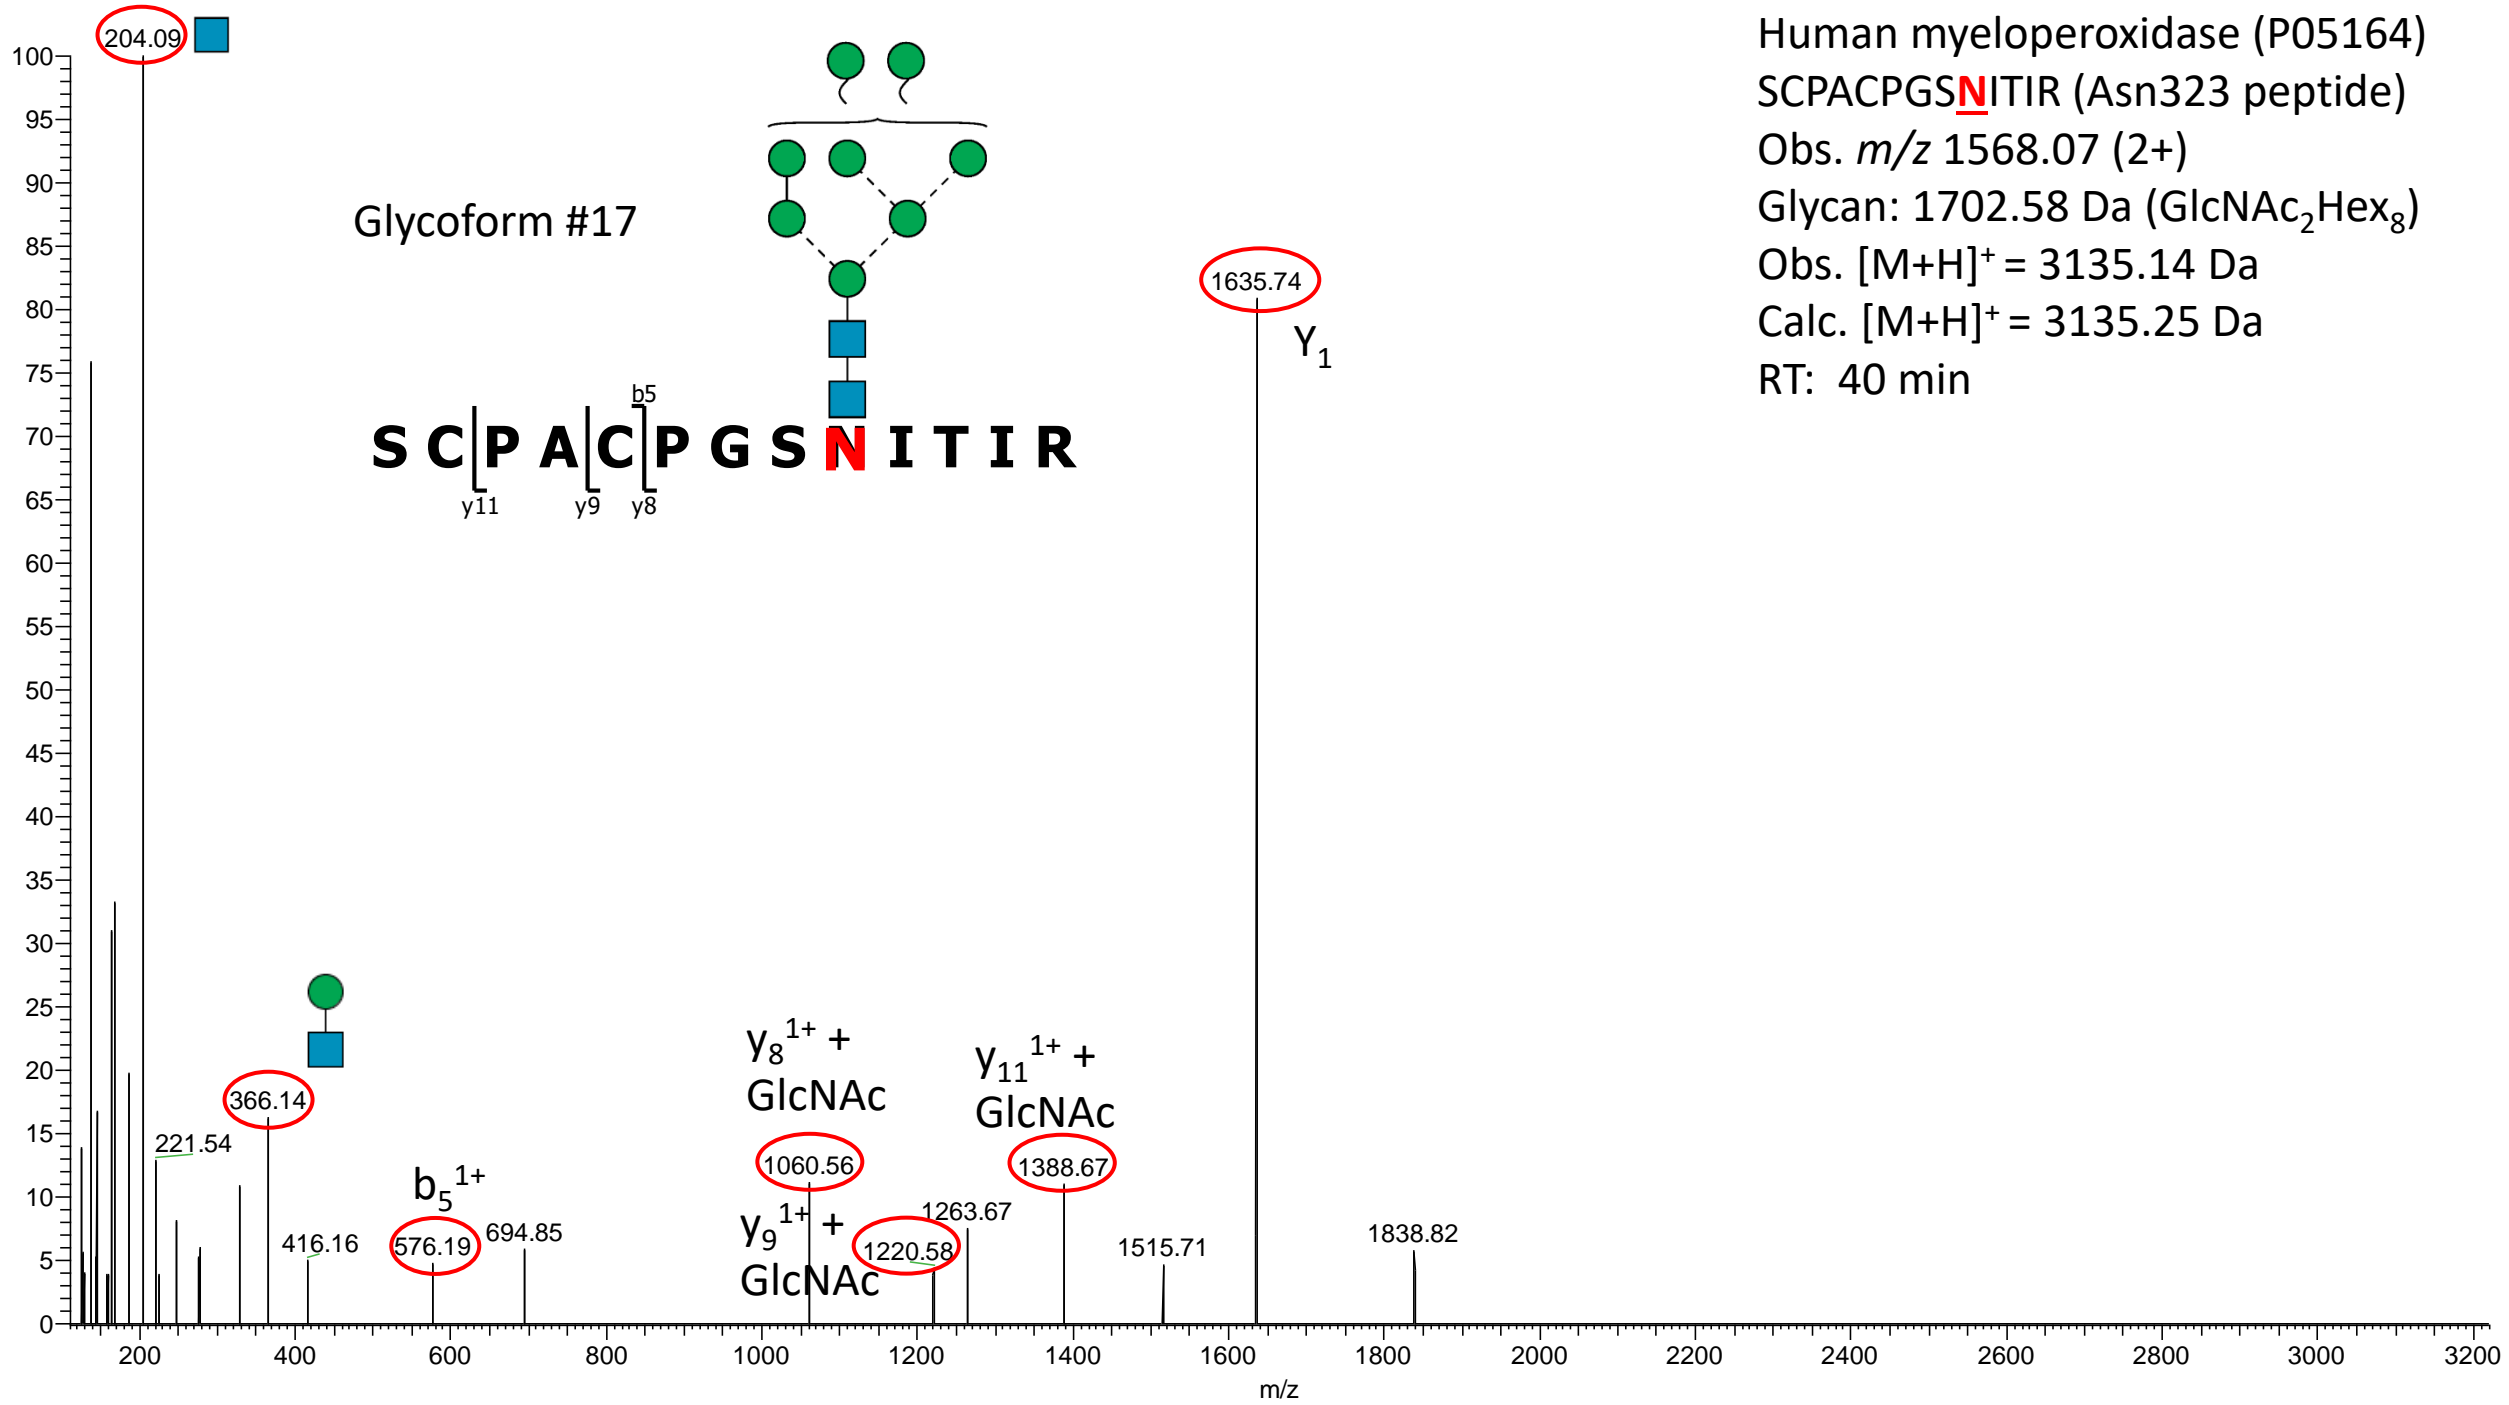

Human myeloperoxidase (P05164)

SCPACPGSNITIR (Asn323 peptide)

Obs.  $m/z$  1000.06 (3+)

Glycan: 1565.56 Da (GlcNAc<sub>3</sub>Hex<sub>5</sub>Fuc<sub>1</sub>)

Obs.  $[M+H]^+$  = 2998.18 Da

Calc.  $[M+H]^+$  = 2998.23 Da

RT: 40 min

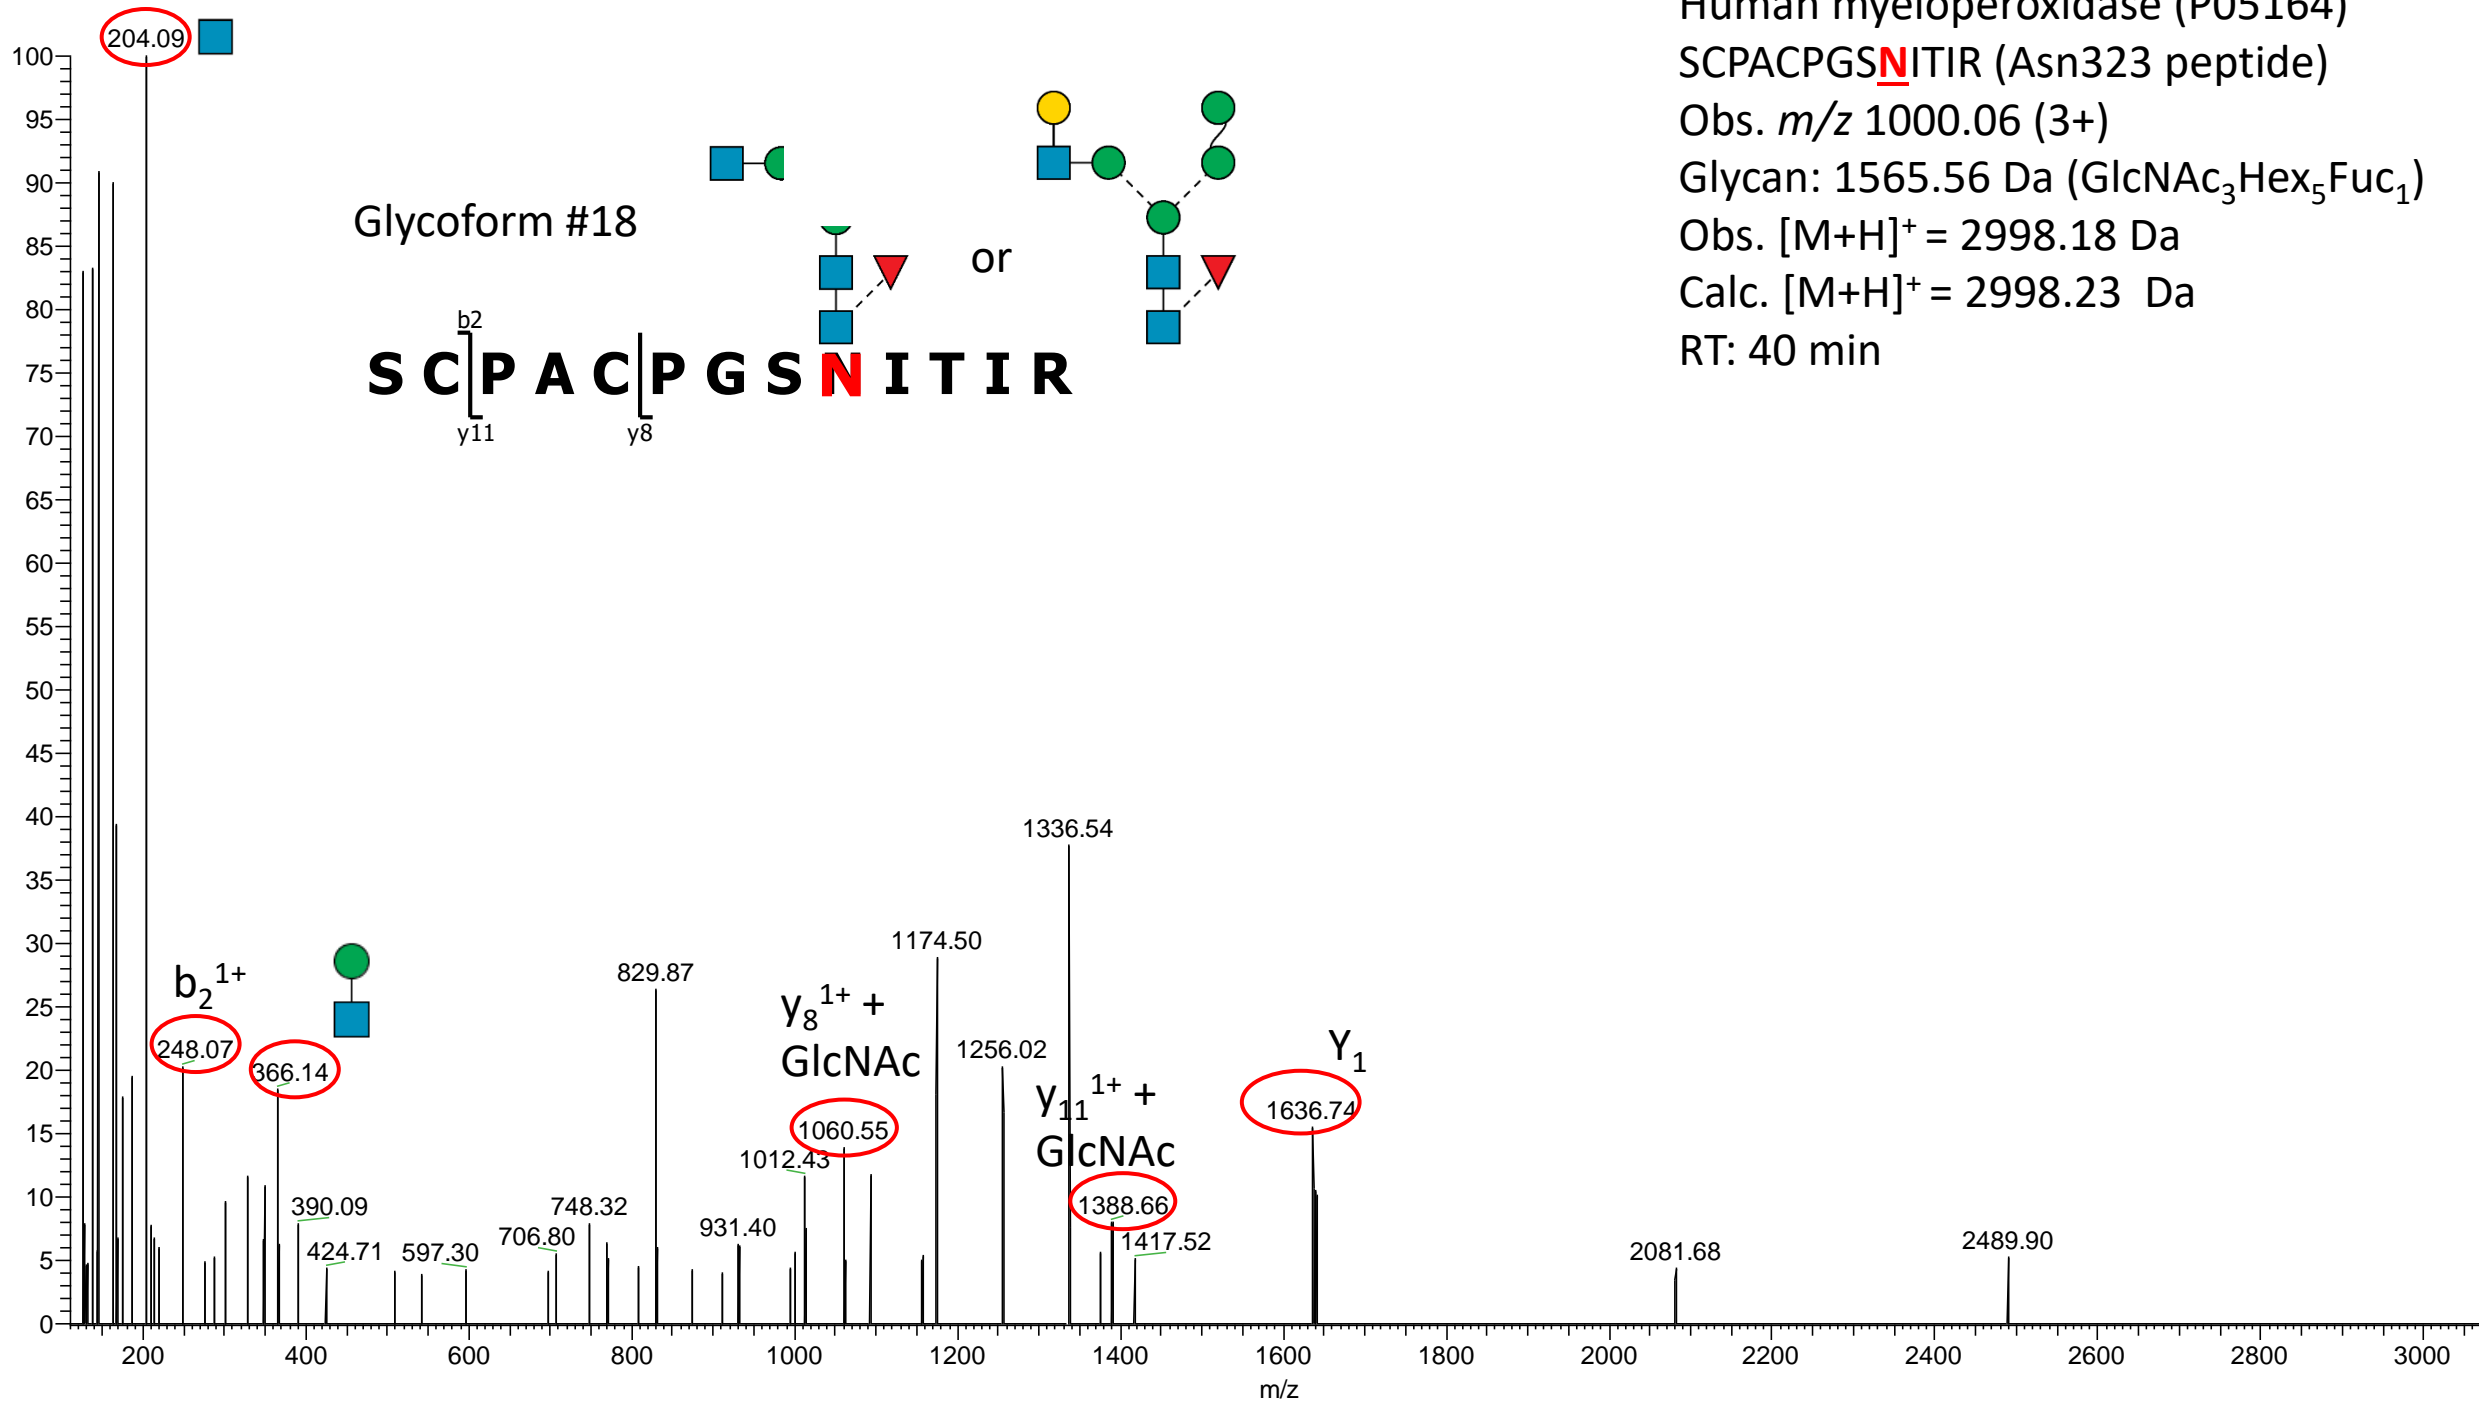

Human myeloperoxidase (P05164)

SCPACPGSNITIR (Asn323 peptide)

Obs.  $m/z$  994.39 (3+)

Glycan: 1548.55 Da (GlcNAc<sub>3</sub>Hex<sub>4</sub>NeuAc<sub>1</sub>)

Obs.  $[M+H]^+$  = 2981.17 Da

Calc.  $[M+H]^+$  = 2981.21 Da

RT: 43 min

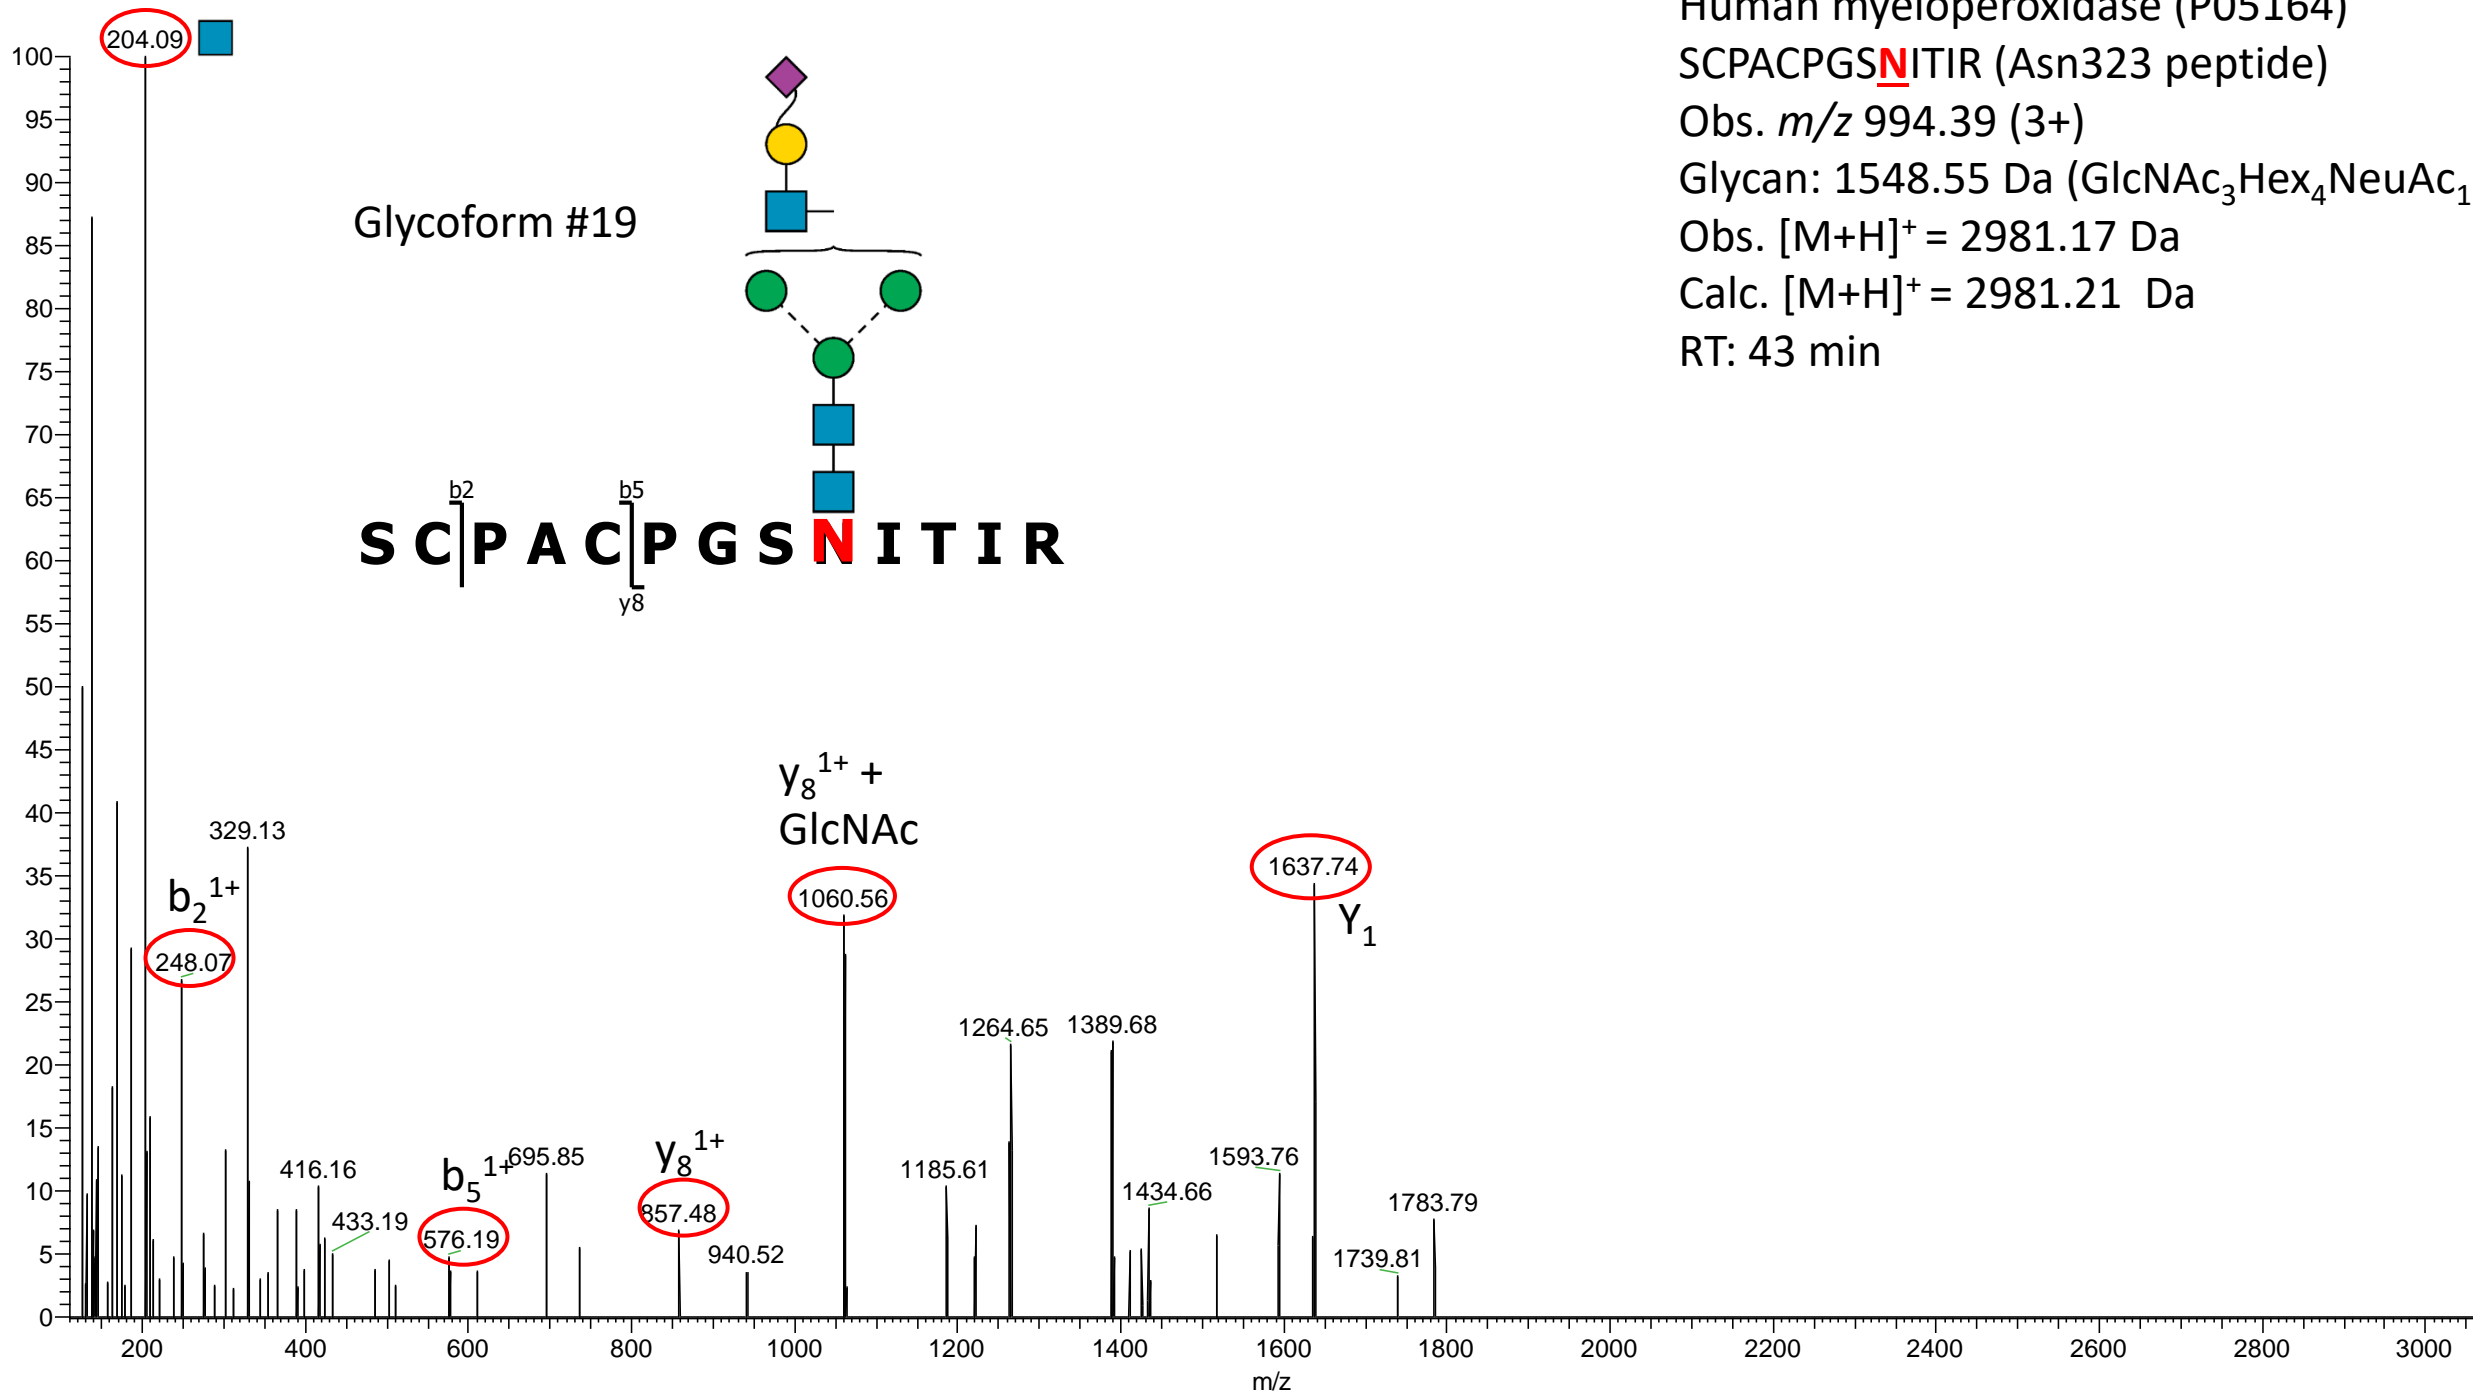

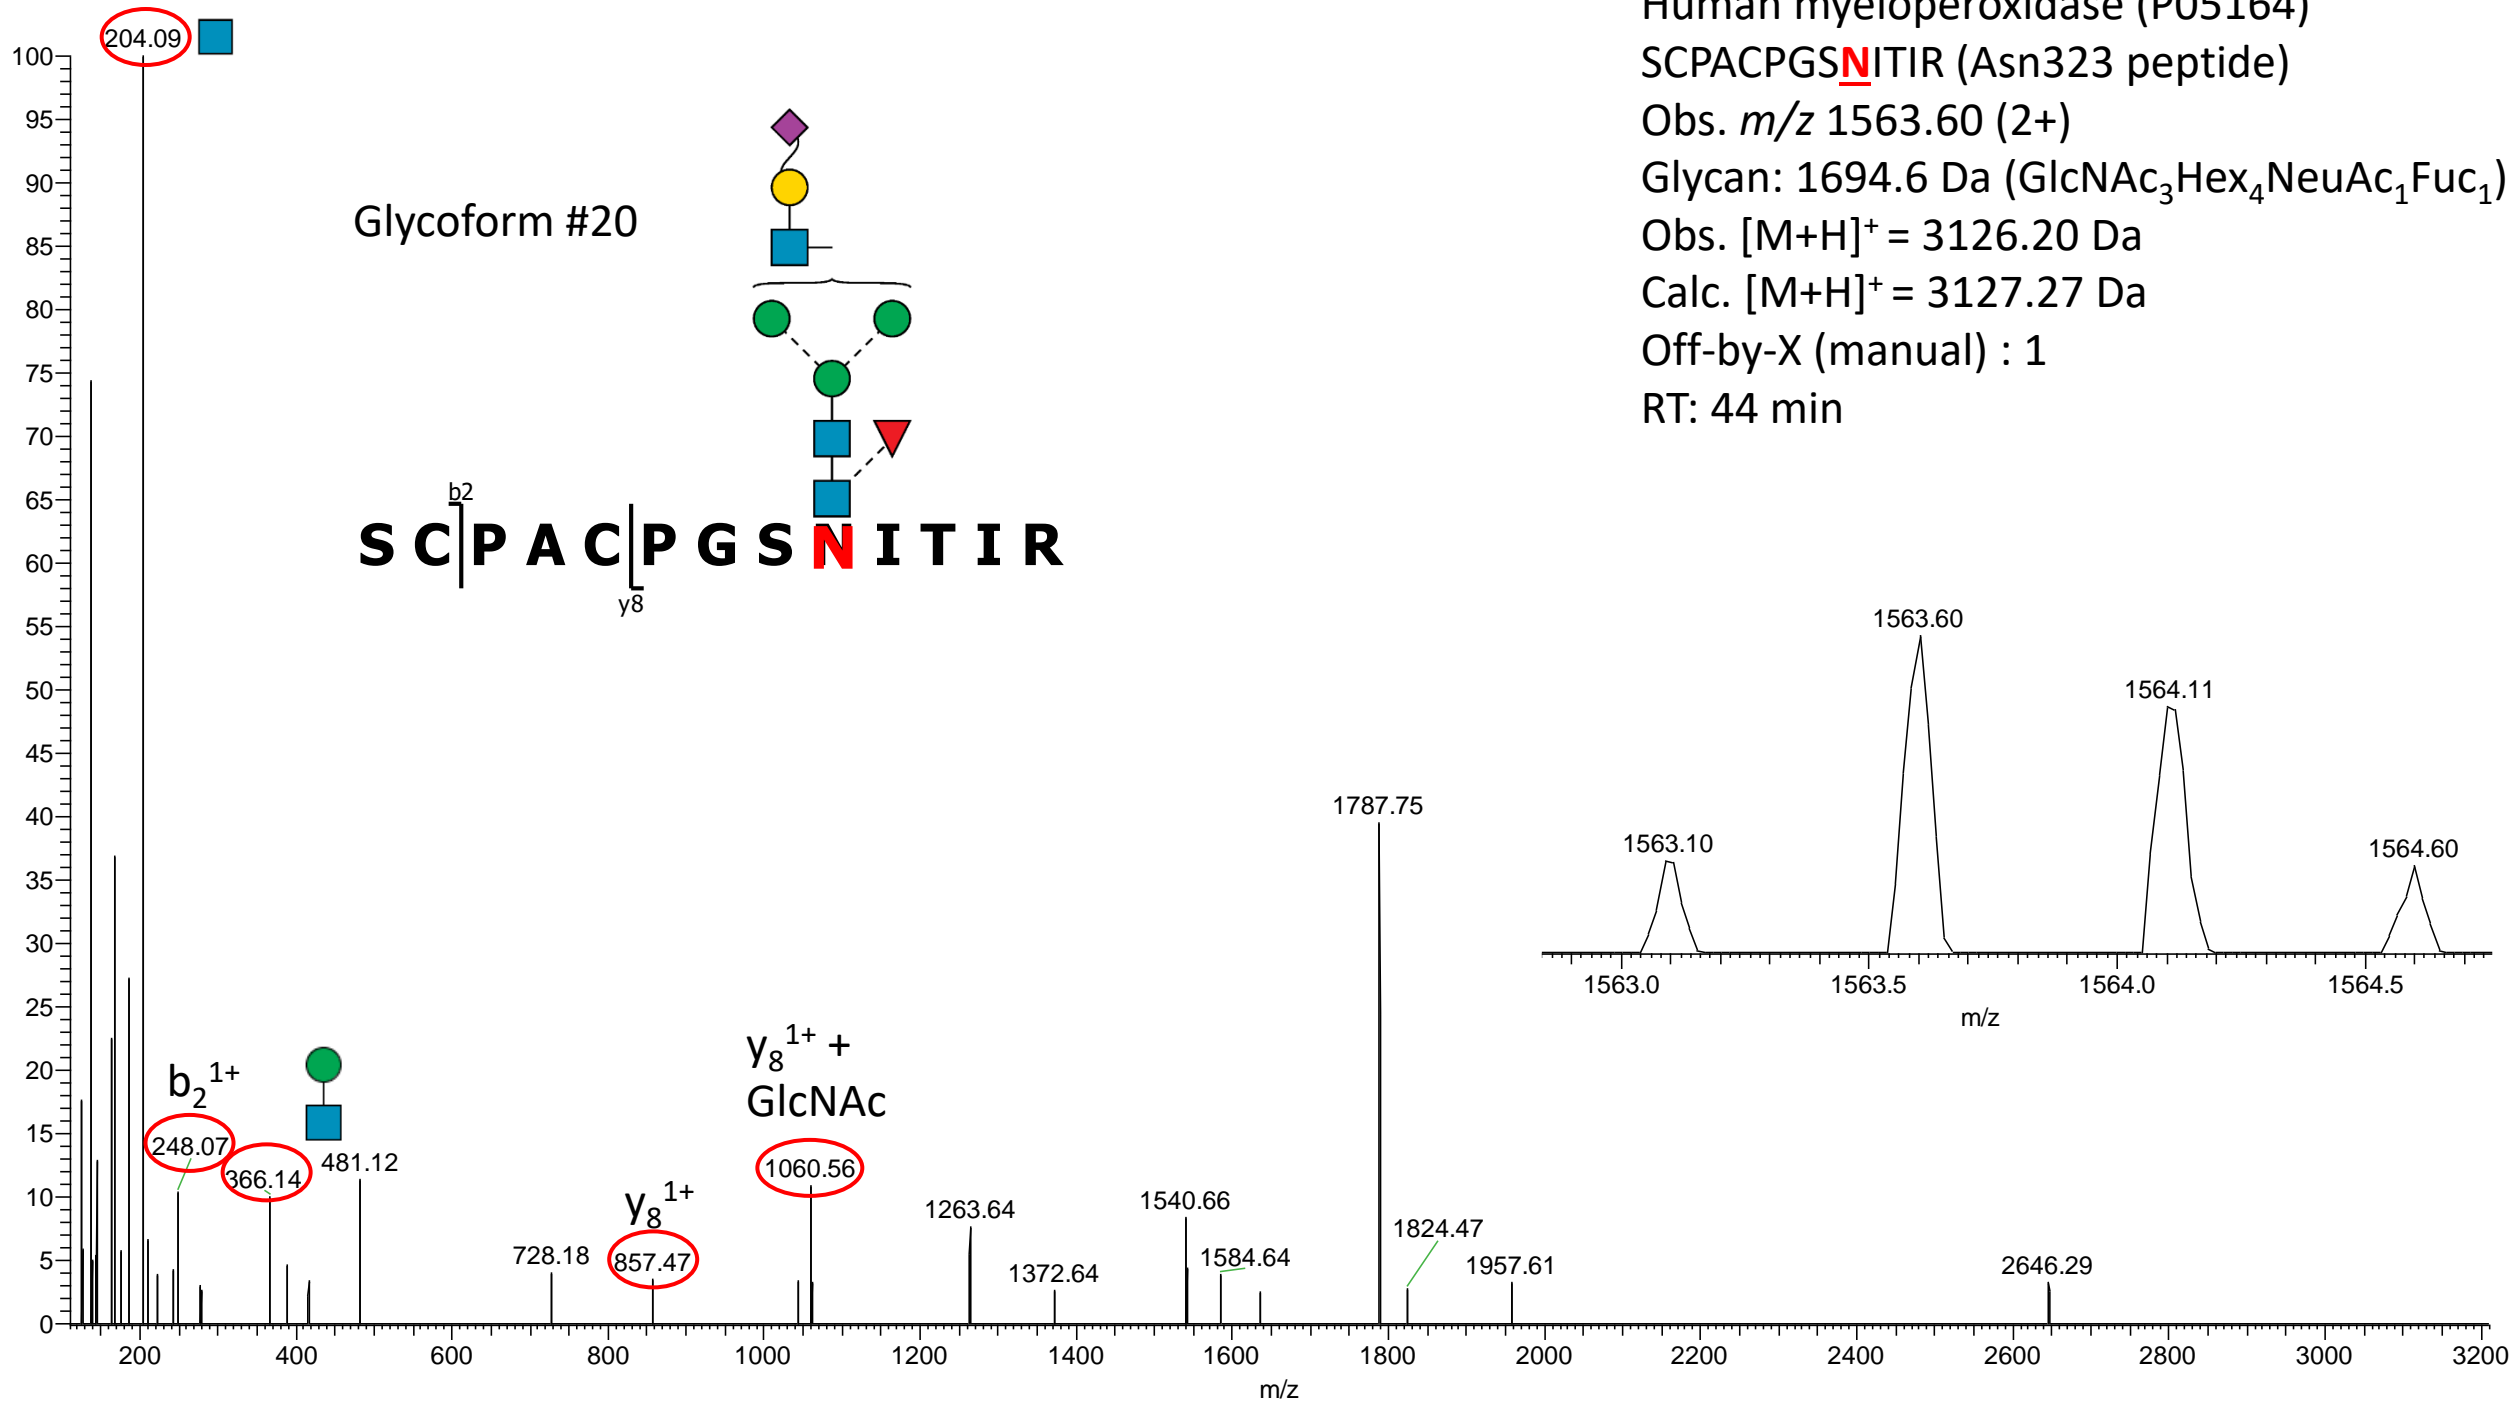

Human myeloperoxidase (P05164)  
SCPACPGS**N**ITIR (Asn323 peptide)  
Obs.  $m/z$  1110.81 (2+)  
Glycan: 1897.68 Da  
(GlcNAc<sub>4</sub>Hex<sub>4</sub>NeuAc<sub>1</sub>Fuc<sub>1</sub>)  
Obs.  $[M+H]^+$  = 3330.43 Da  
Calc.  $[M+H]^+$  = 3330.35 Da  
RT: 42 min

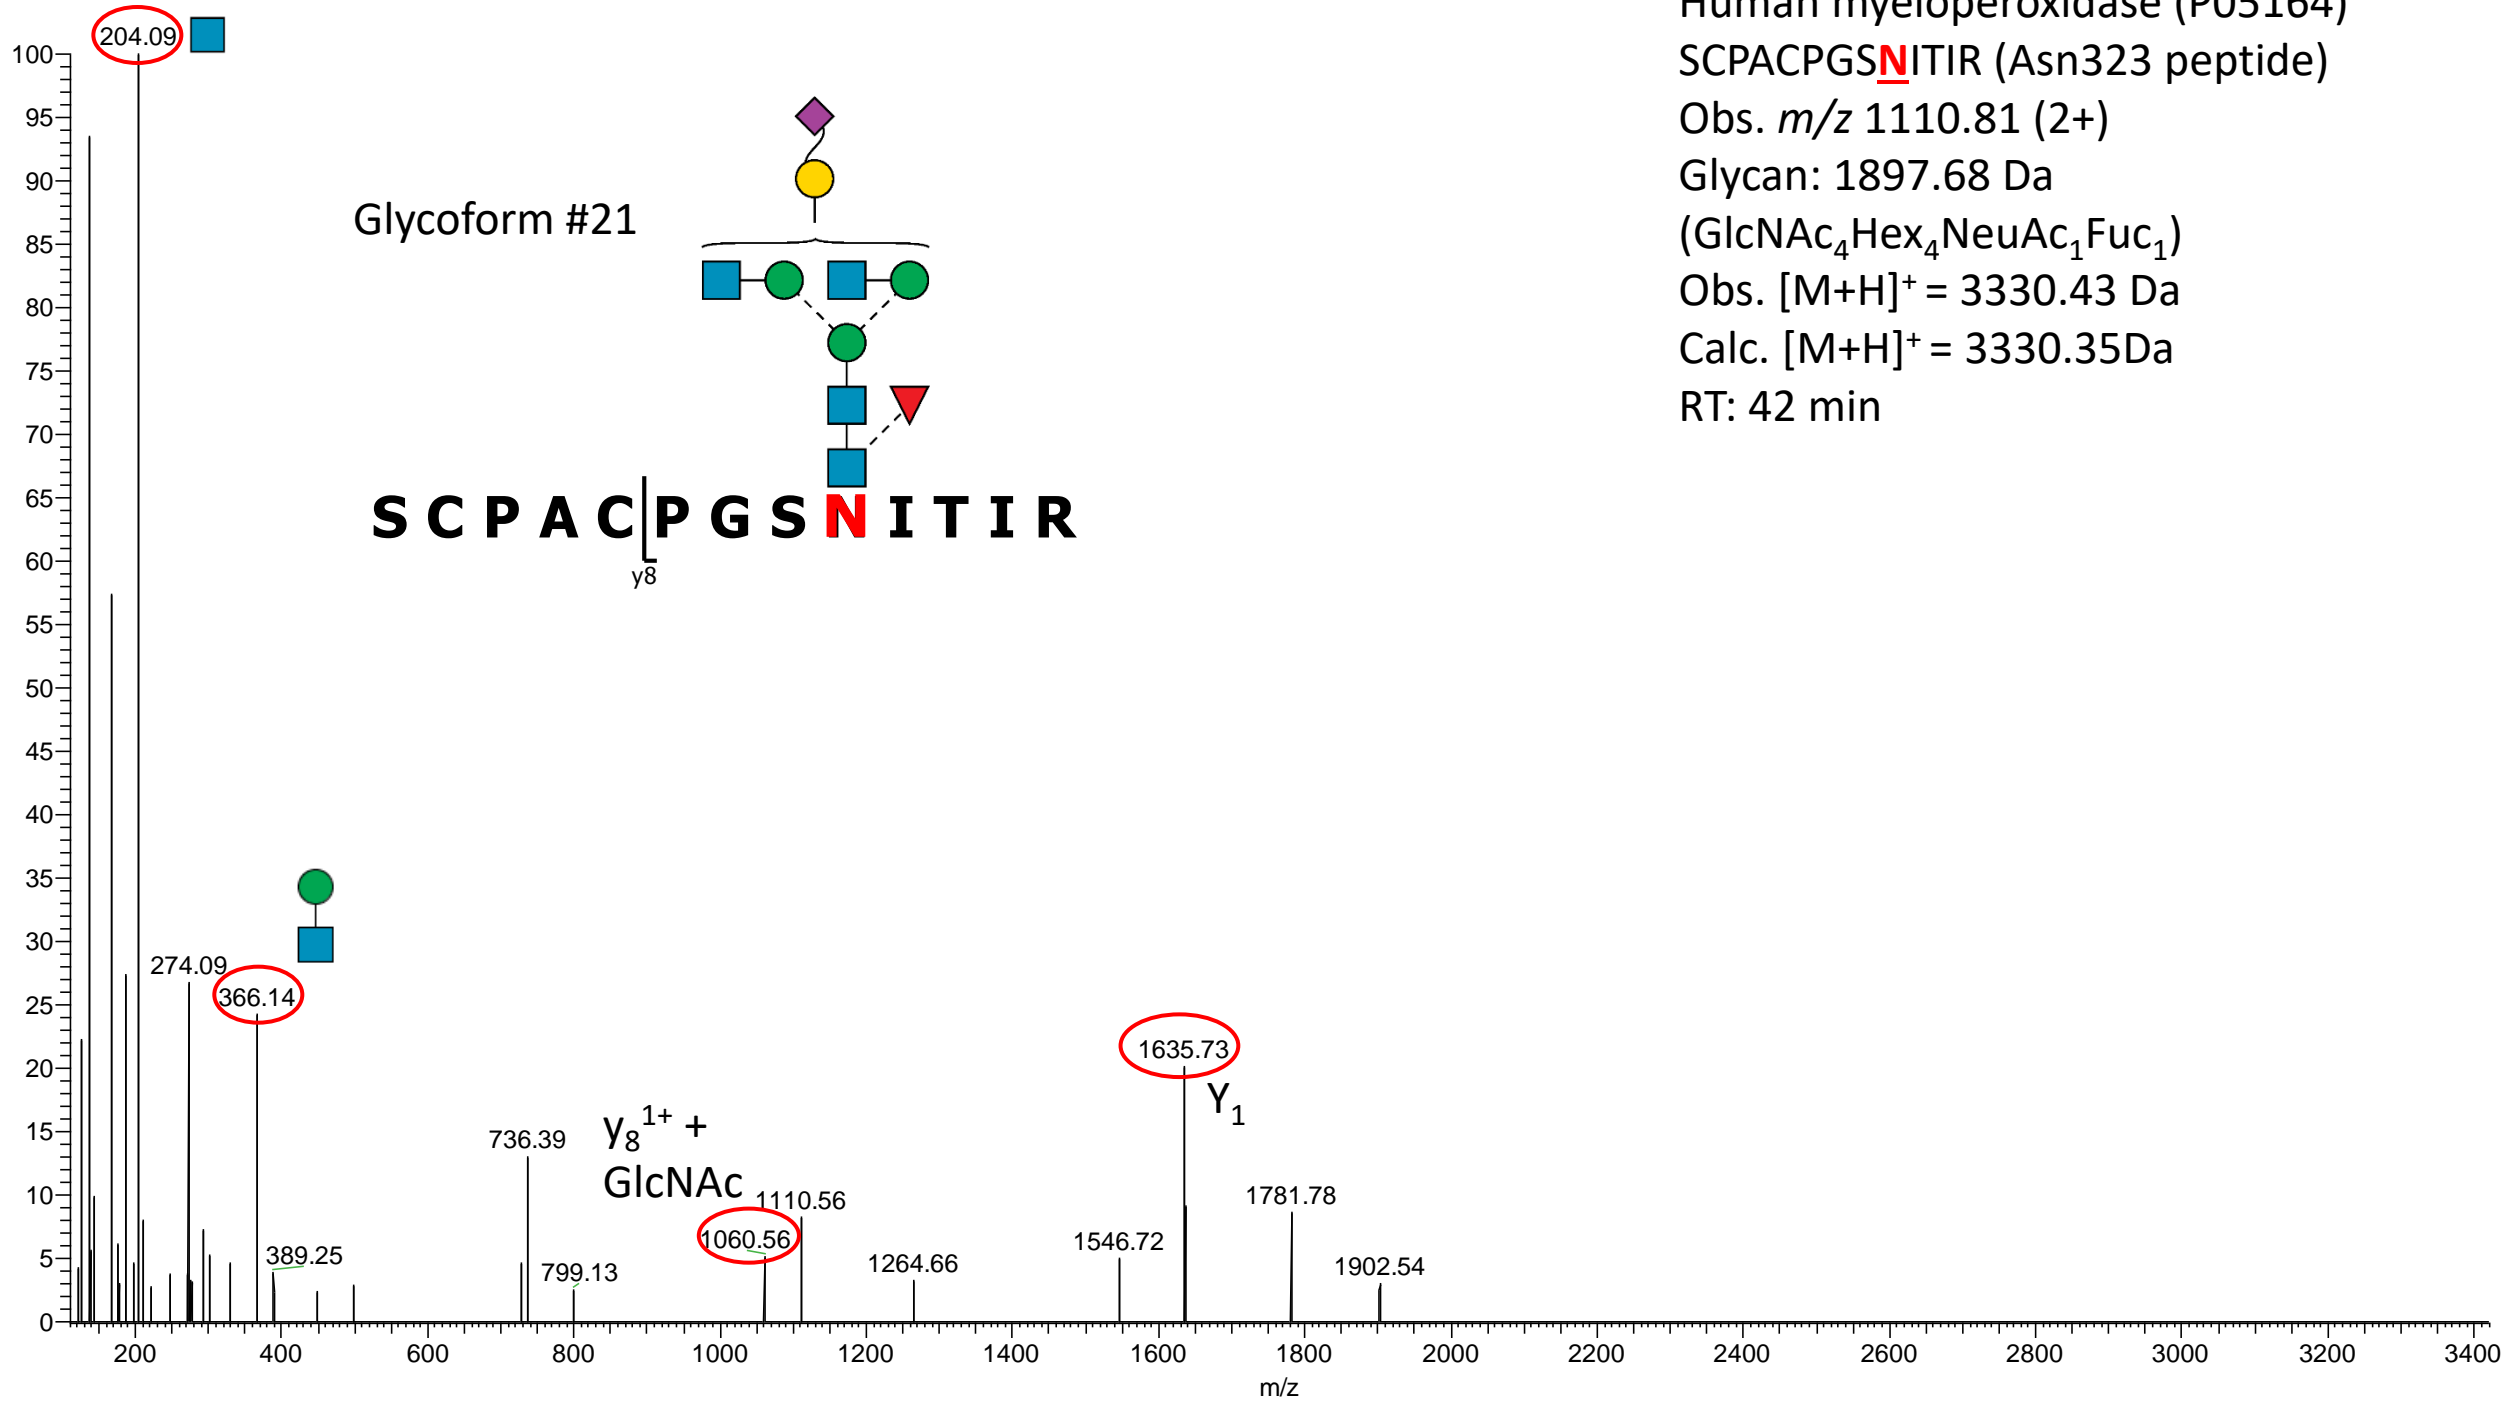

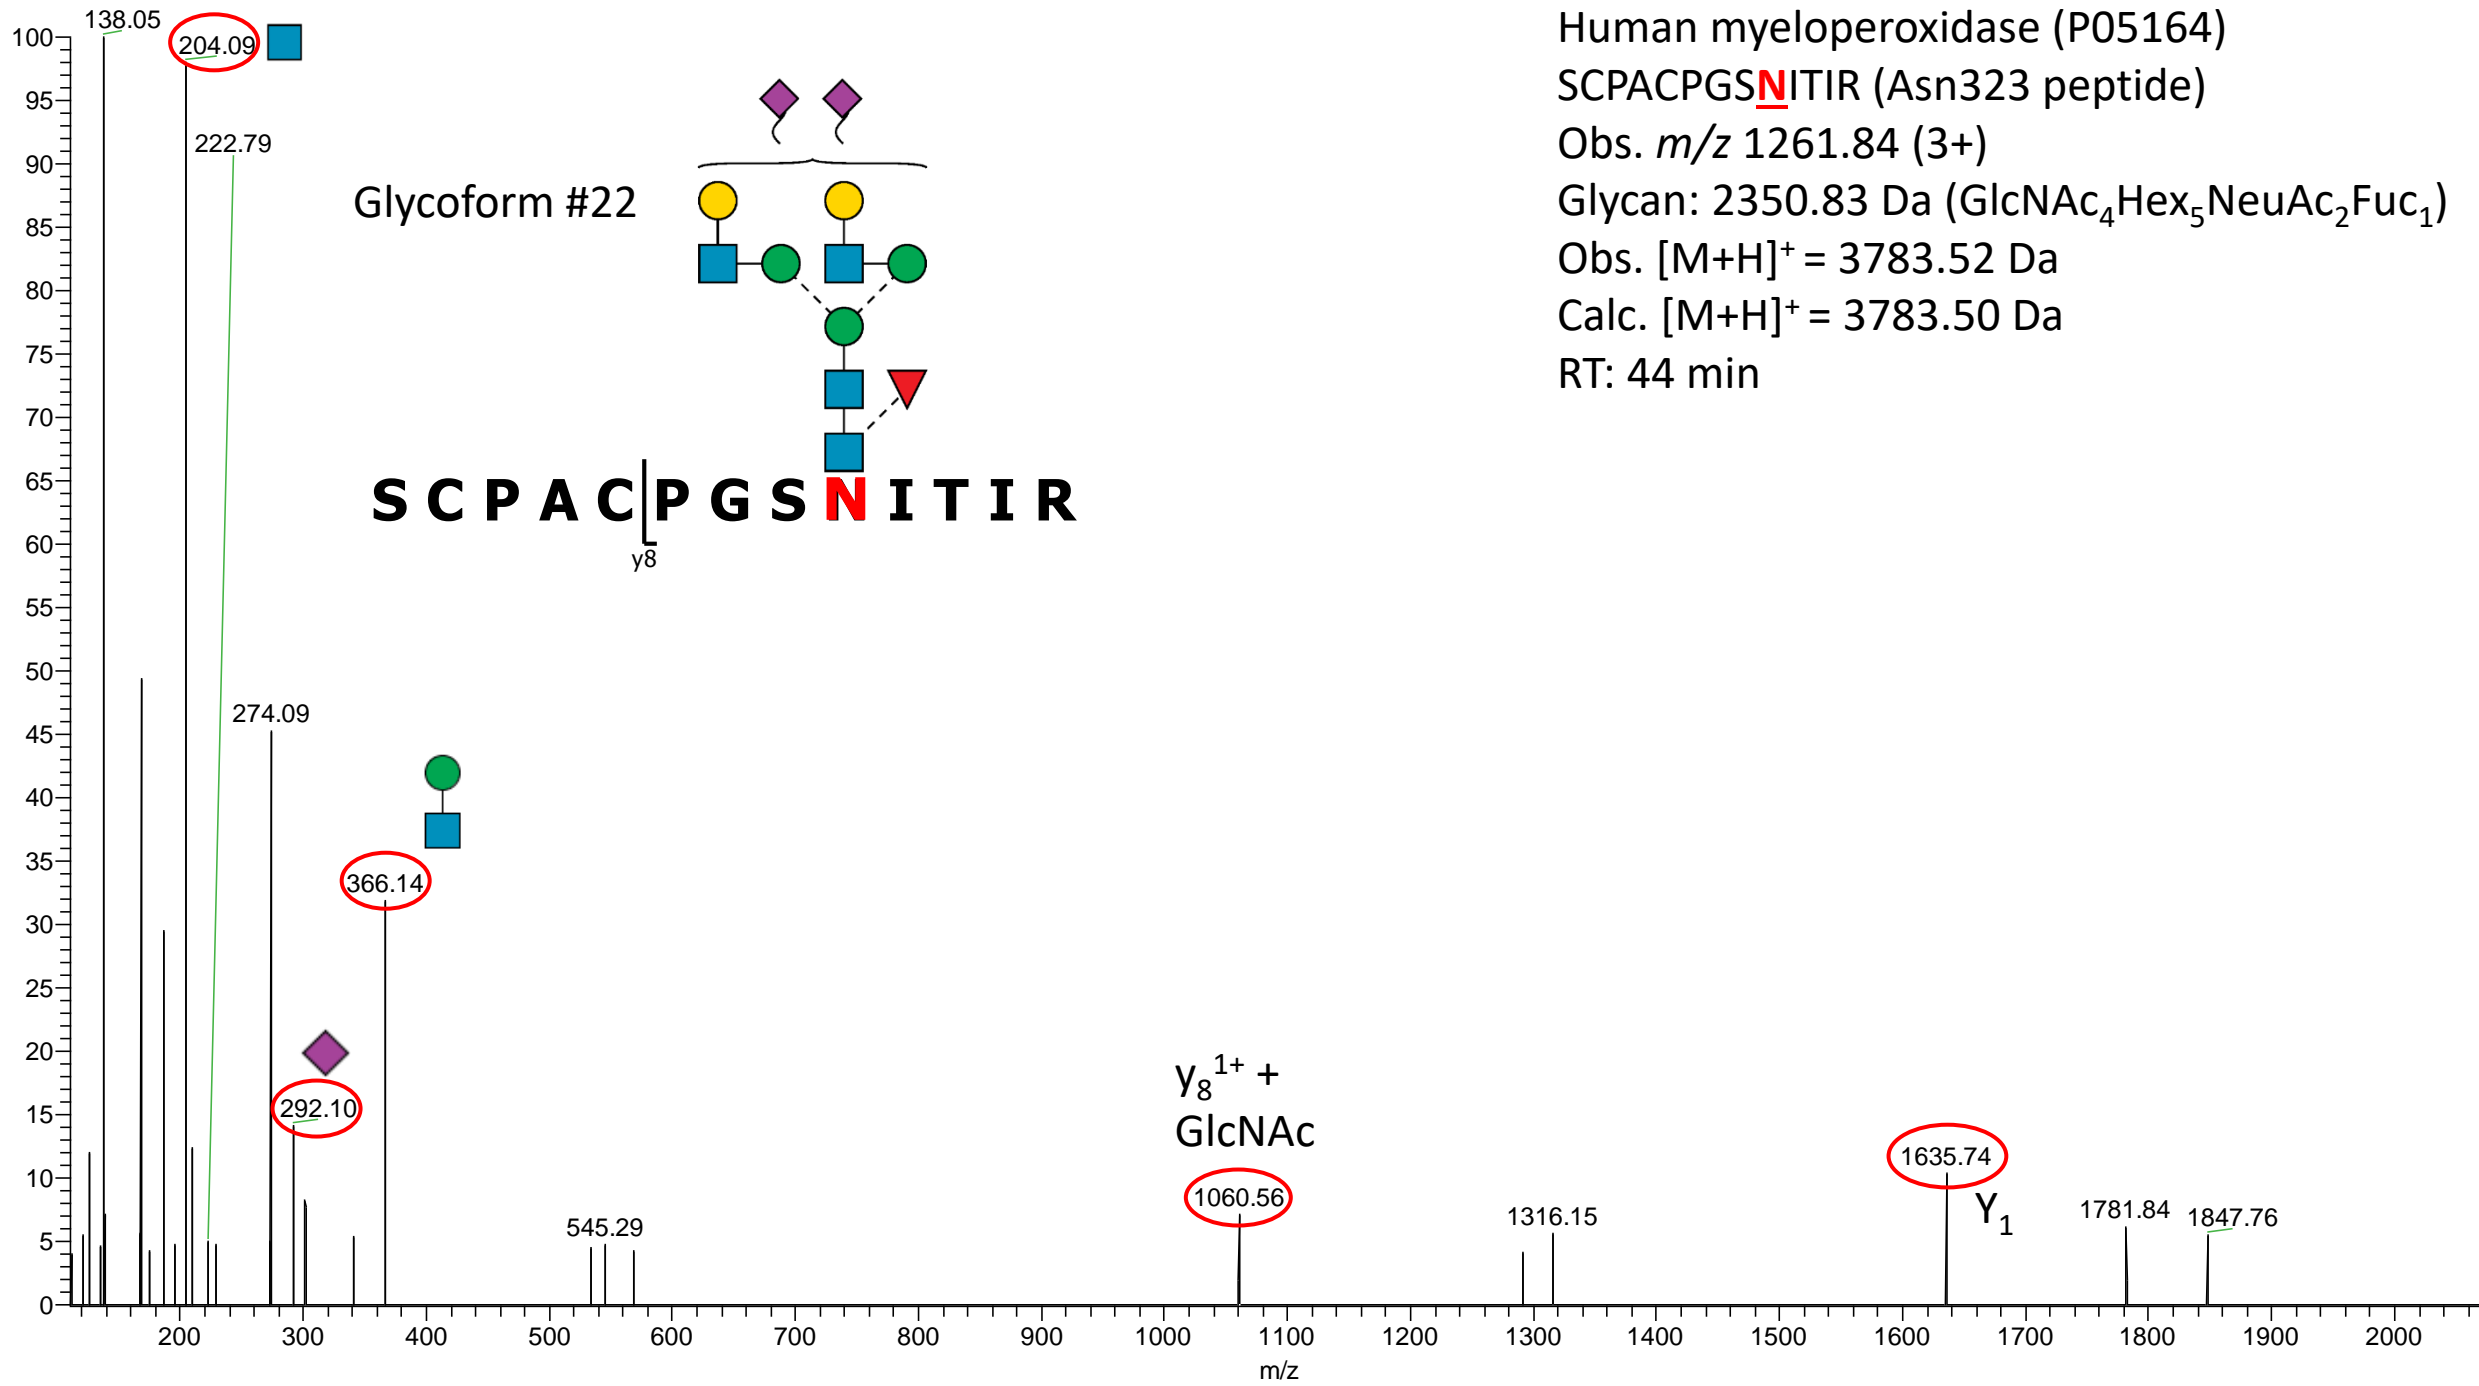



## **Supplementary Data S3B**

Manually annotated reversed phase-LC-ESI-HCD-MS/MS (+) spectra of all glycosylated and non-glycosylated peptides containing Asn355 identified from the analysis of the unenriched peptide mixtures of nMPO.

Human myeloperoxidase (P05164)  
NLRNMSNQLGLLAVNQR (Asn355 peptide)  
Obs.  $m/z$  653.33 (3+)  
Obs.  $[M+H]^+ = 1957.99$  Da  
Calc.  $[M+H]^+ = 1957.04$  Da  
RT: 59 min

Non-glycosylated peptide

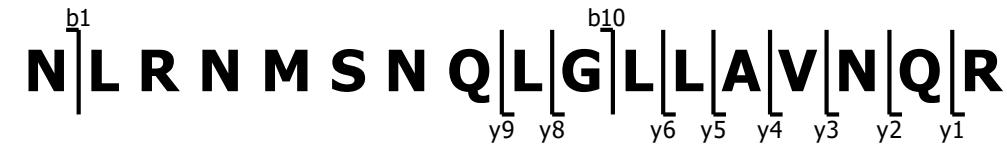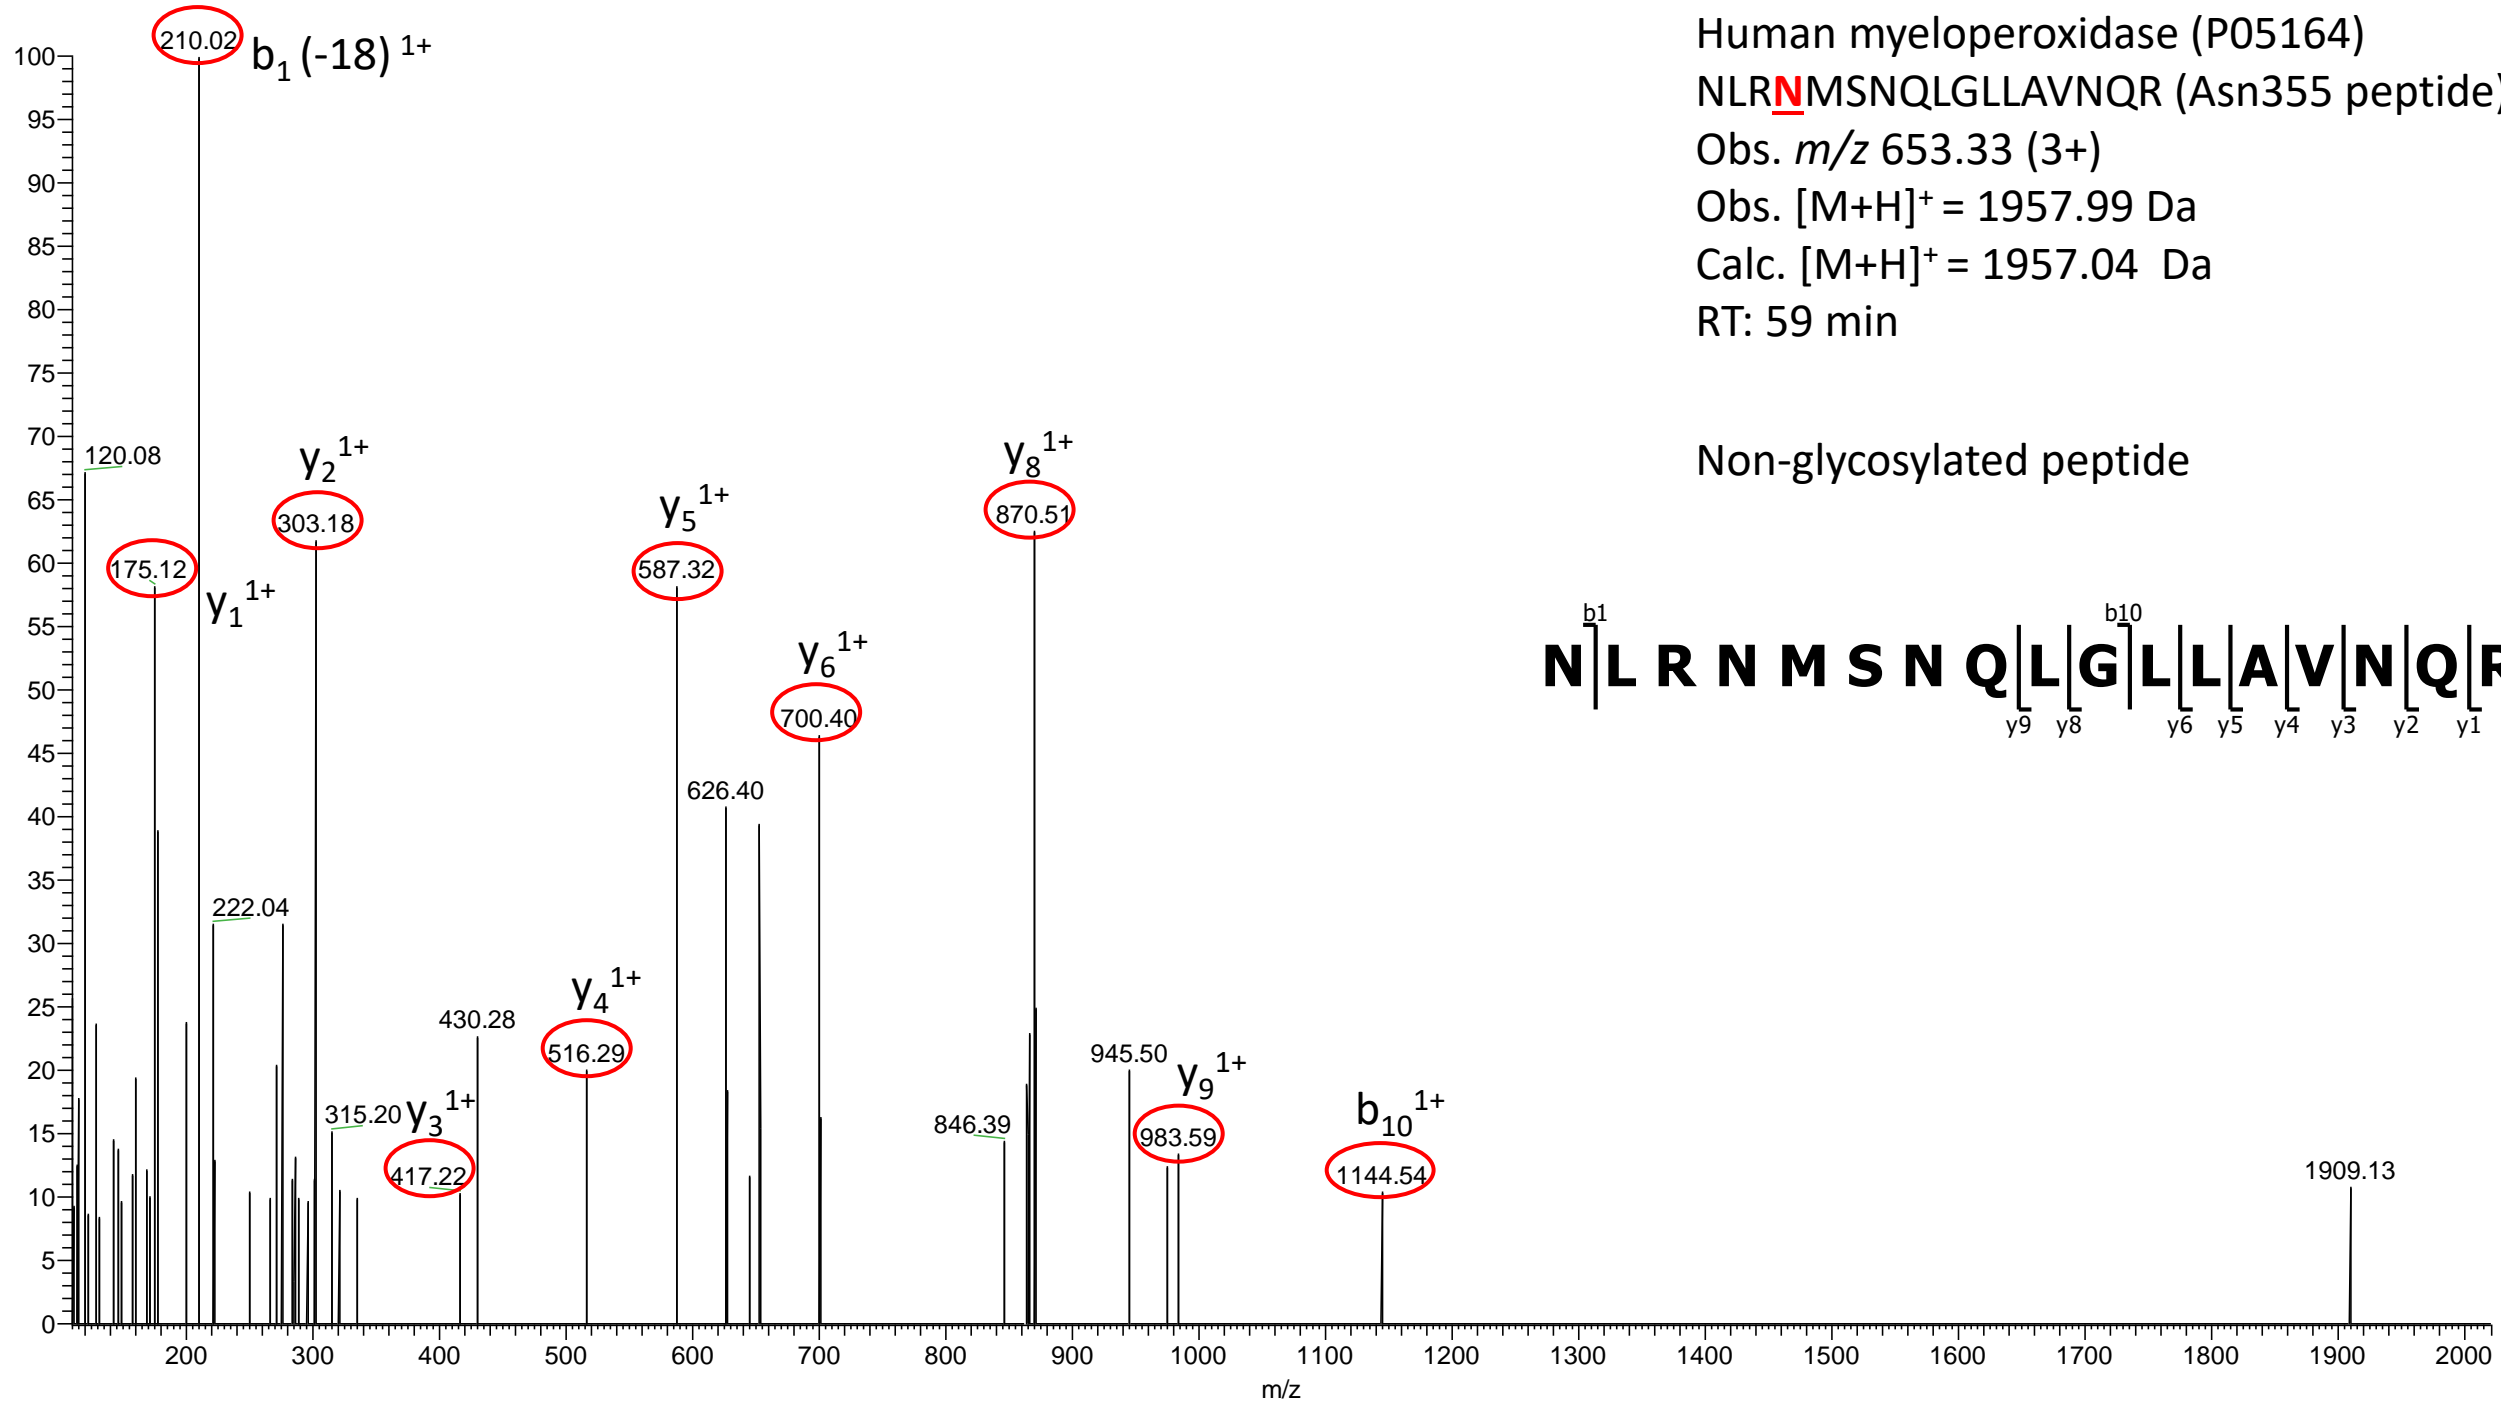

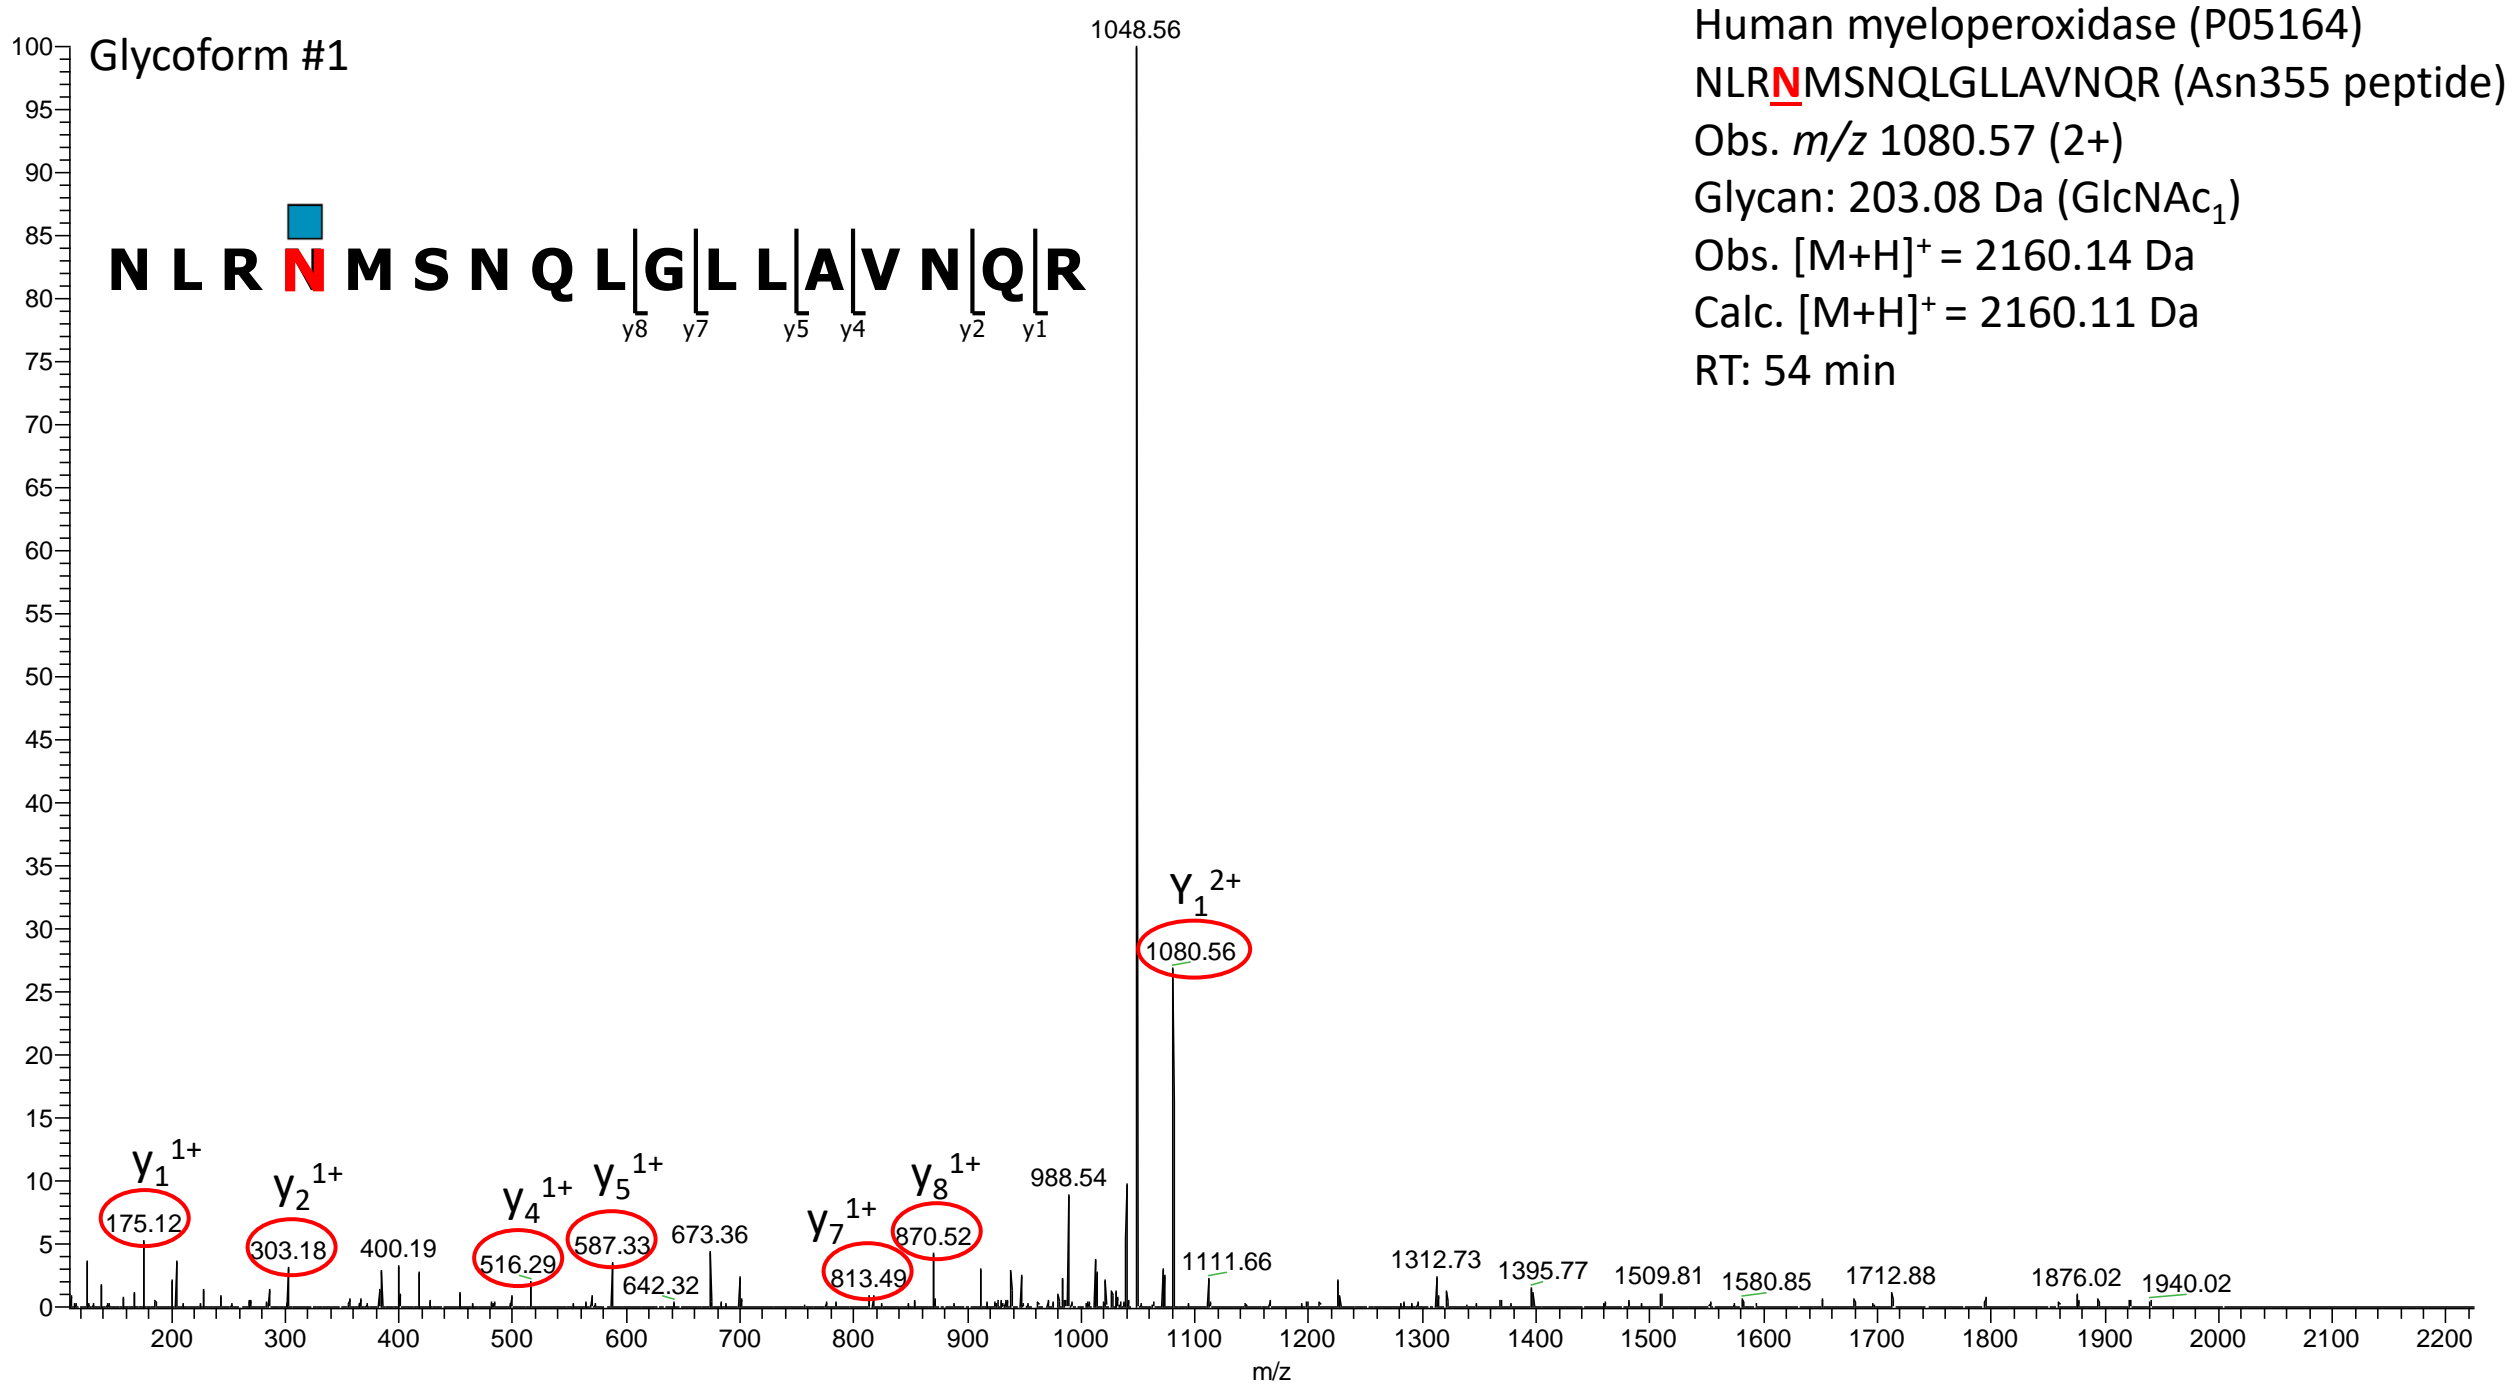

Glycoform #2

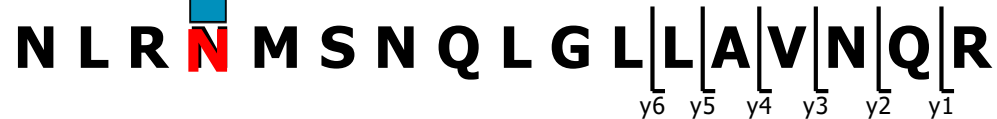

1150.10

Human myeloperoxidase (P05164)  
NLR**N**MSNQLGLLAVNQR (Asn355 peptide)  
Obs.  $m/z$  1182.10 (2+)  
Glycan: 406.16 Da (GlcNAc<sub>2</sub>)  
Obs.  $[M+H]^+$  = 2363.20 Da  
Calc.  $[M+H]^+$  = 2363.20 Da  
RT: 56 min

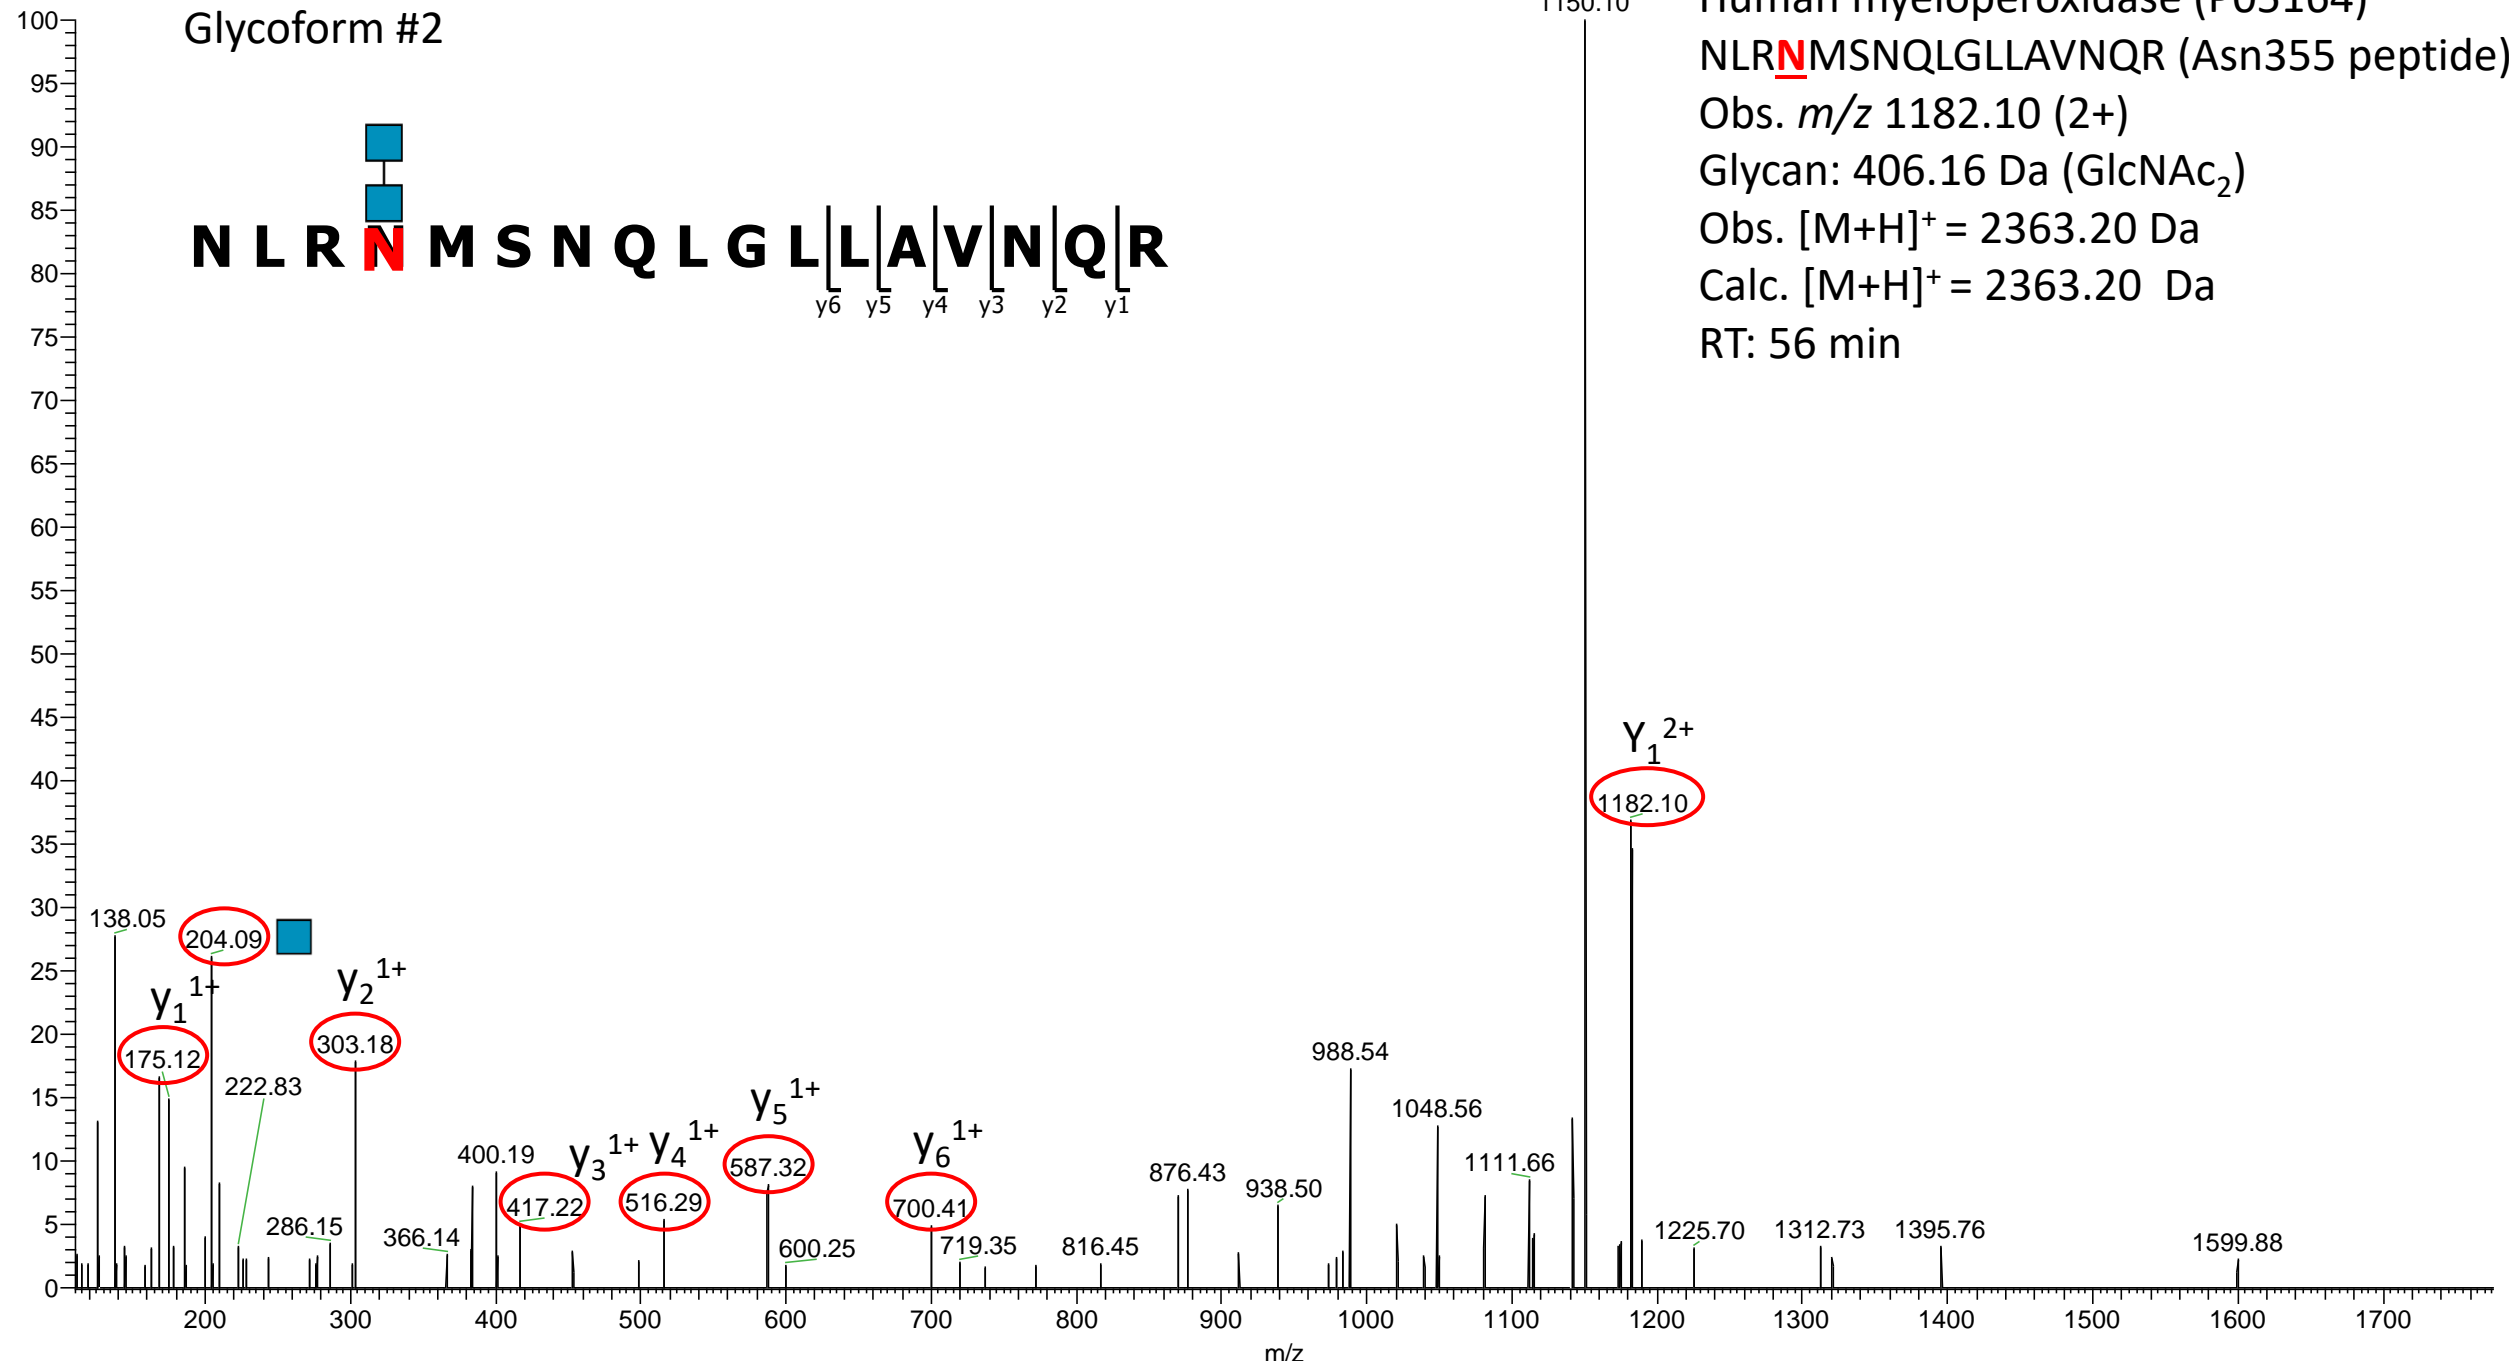

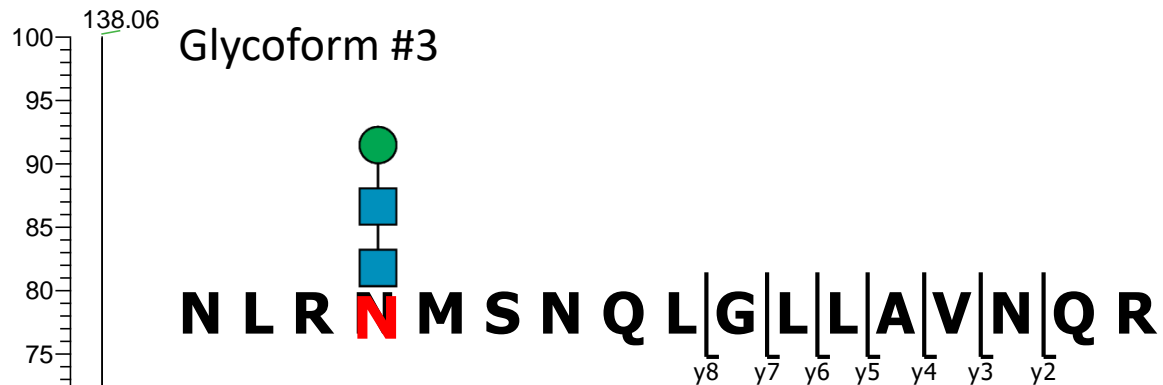

Human myeloperoxidase (P05164)  
 NLR**N**MSNQLGLLAVNQR (Asn355 peptide)  
 Obs.  $m/z$  842.76 (3+)  
 Glycan: 568.21 Da (GlcNAc<sub>2</sub>Hex<sub>1</sub>)  
 Obs.  $[M+H]^+$  = 2526.28 Da  
 Calc.  $[M+H]^+$  = 2525.25 Da  
 Off-by-X (Manual) : 1  
 RT: 53 min

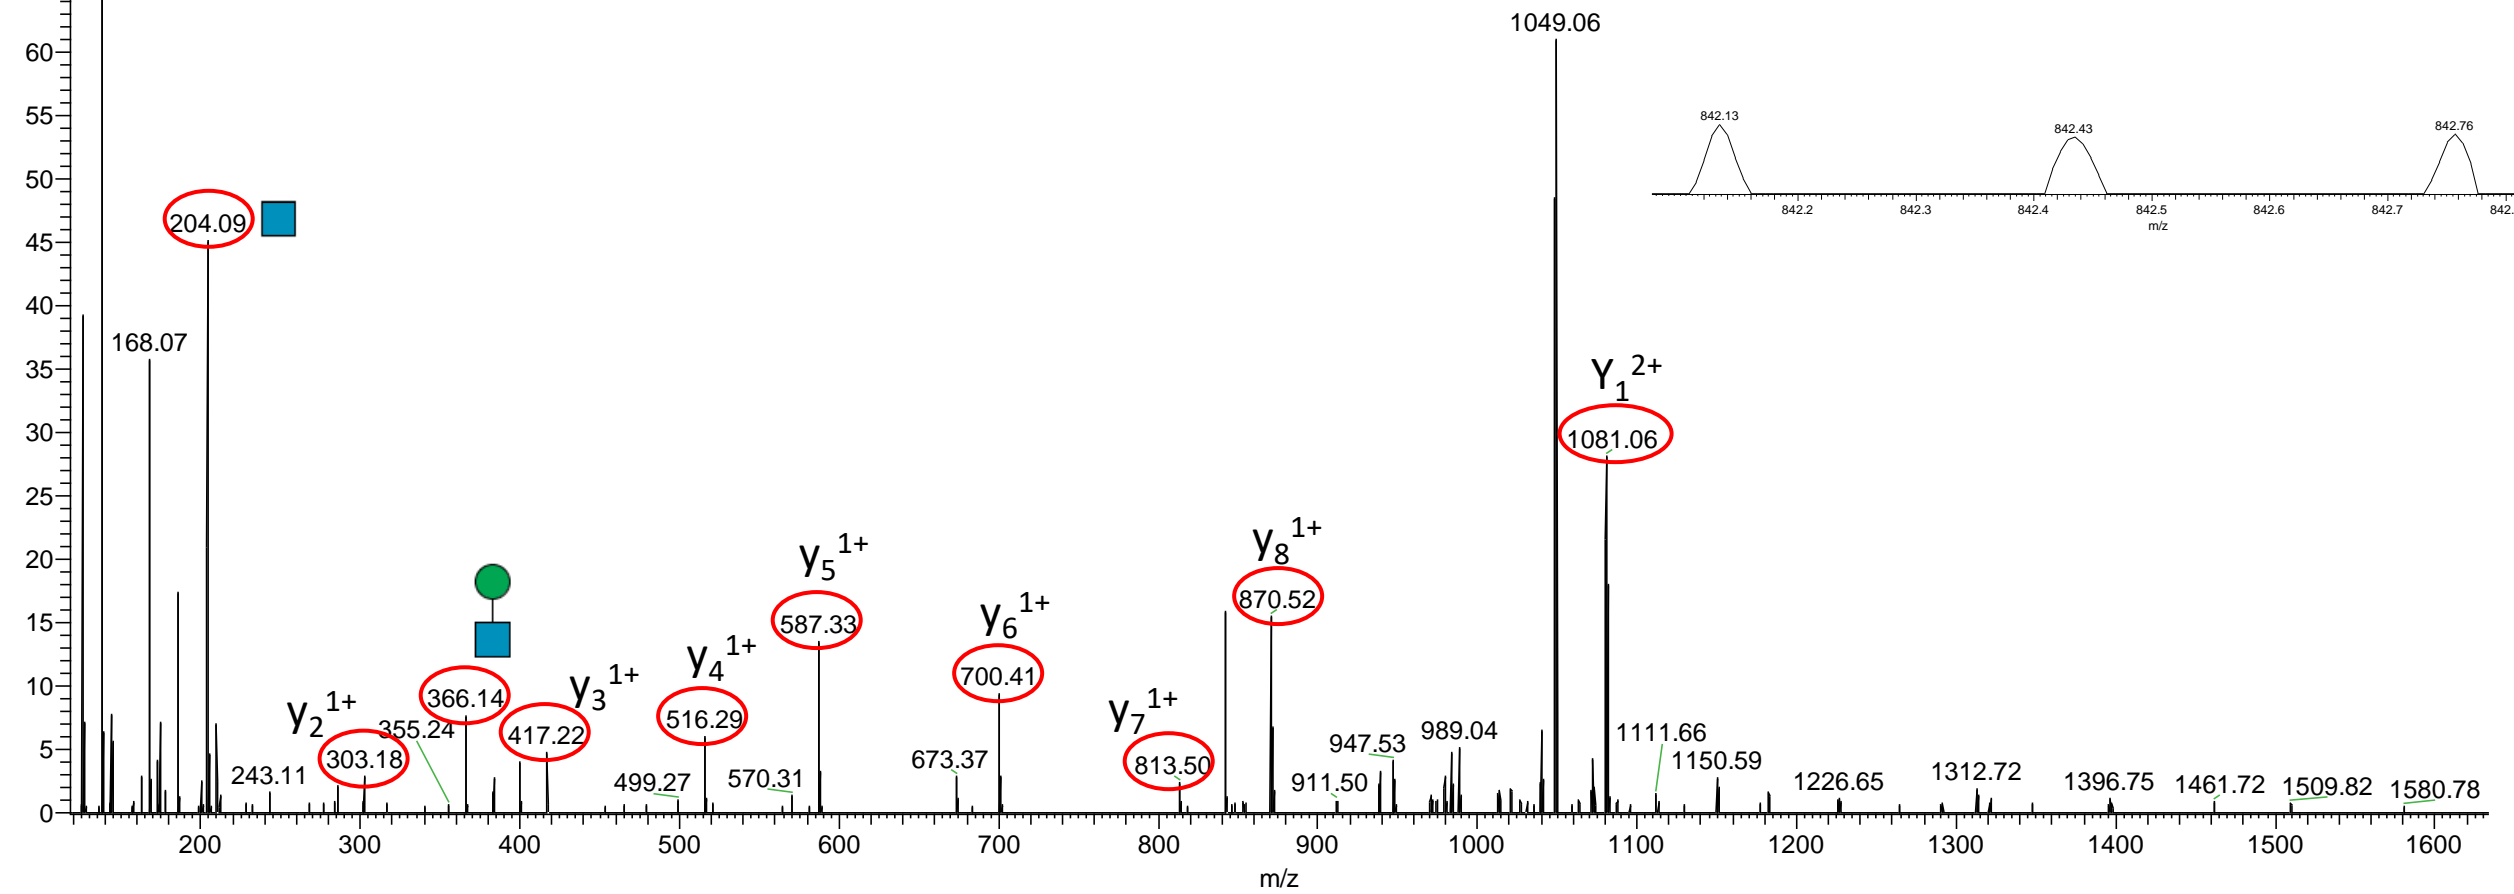

Human myeloperoxidase (P05164)  
NLR**N**MSNQLGLLAVNQR (Asn355 peptide)  
Obs.  $m/z$  896.44 (3+)  
Glycan: 730.26 Da (GlcNAc<sub>2</sub>Hex<sub>2</sub>)  
Obs.  $[M+H]^+$  = 2687.32 Da  
Calc.  $[M+H]^+$  = 2687.30 Da  
RT: 52 min

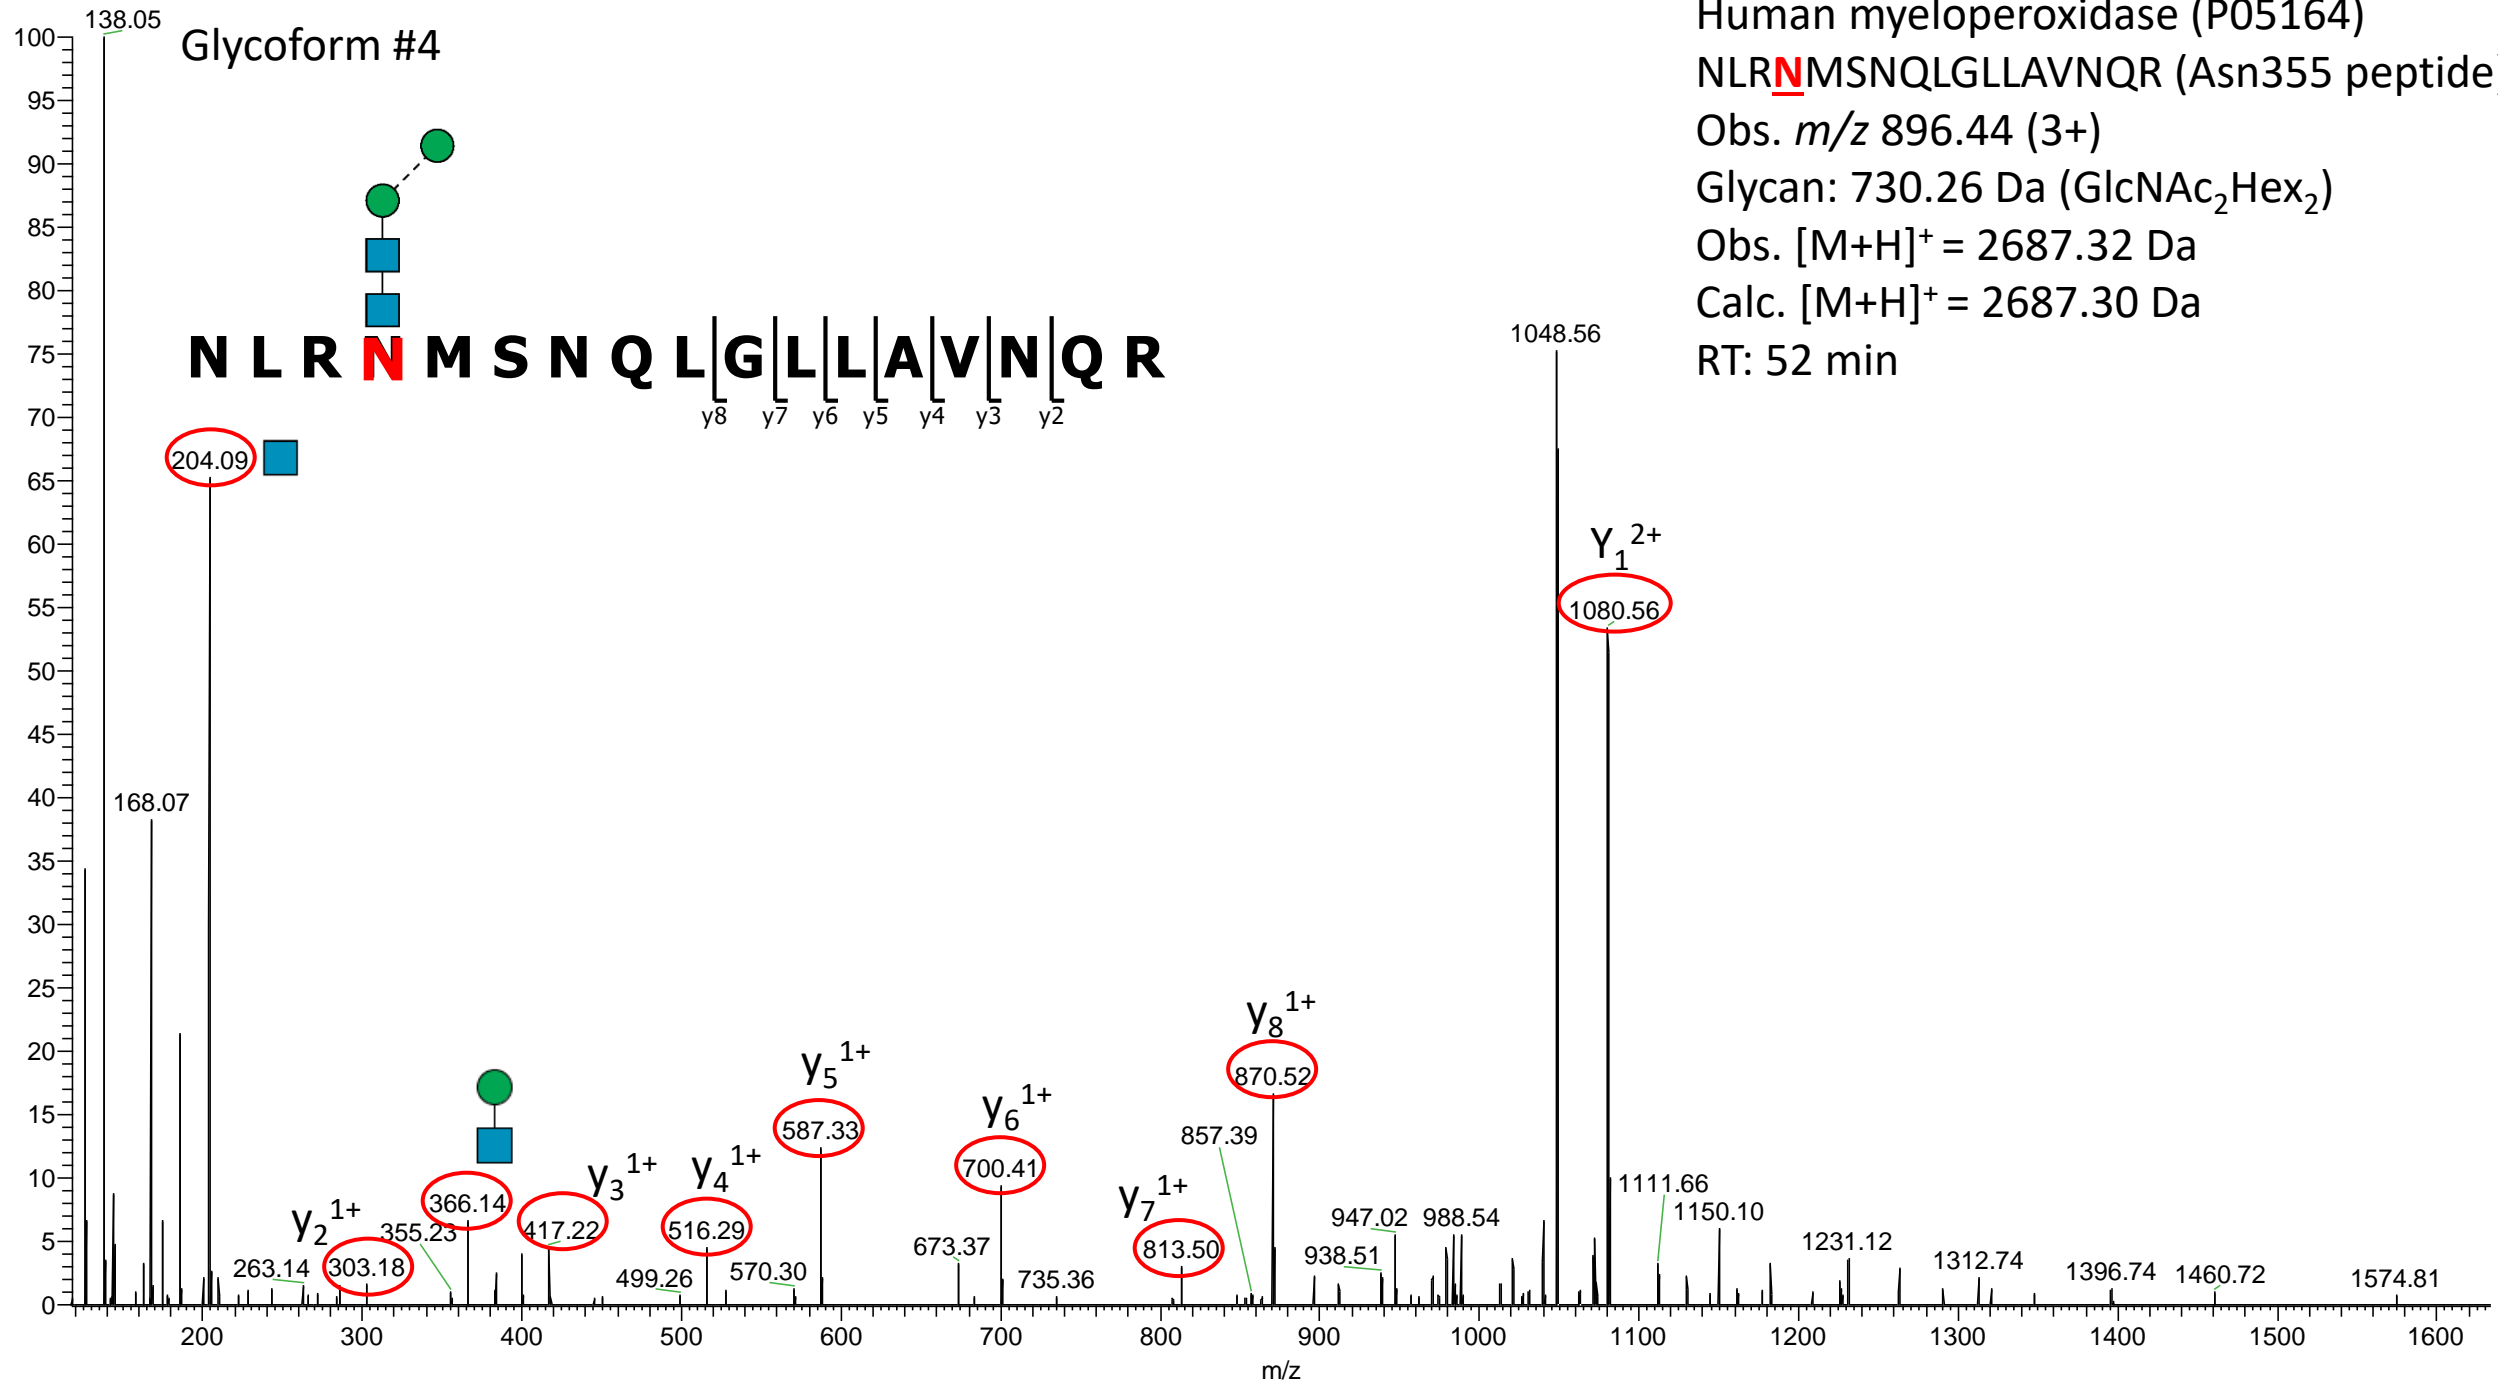

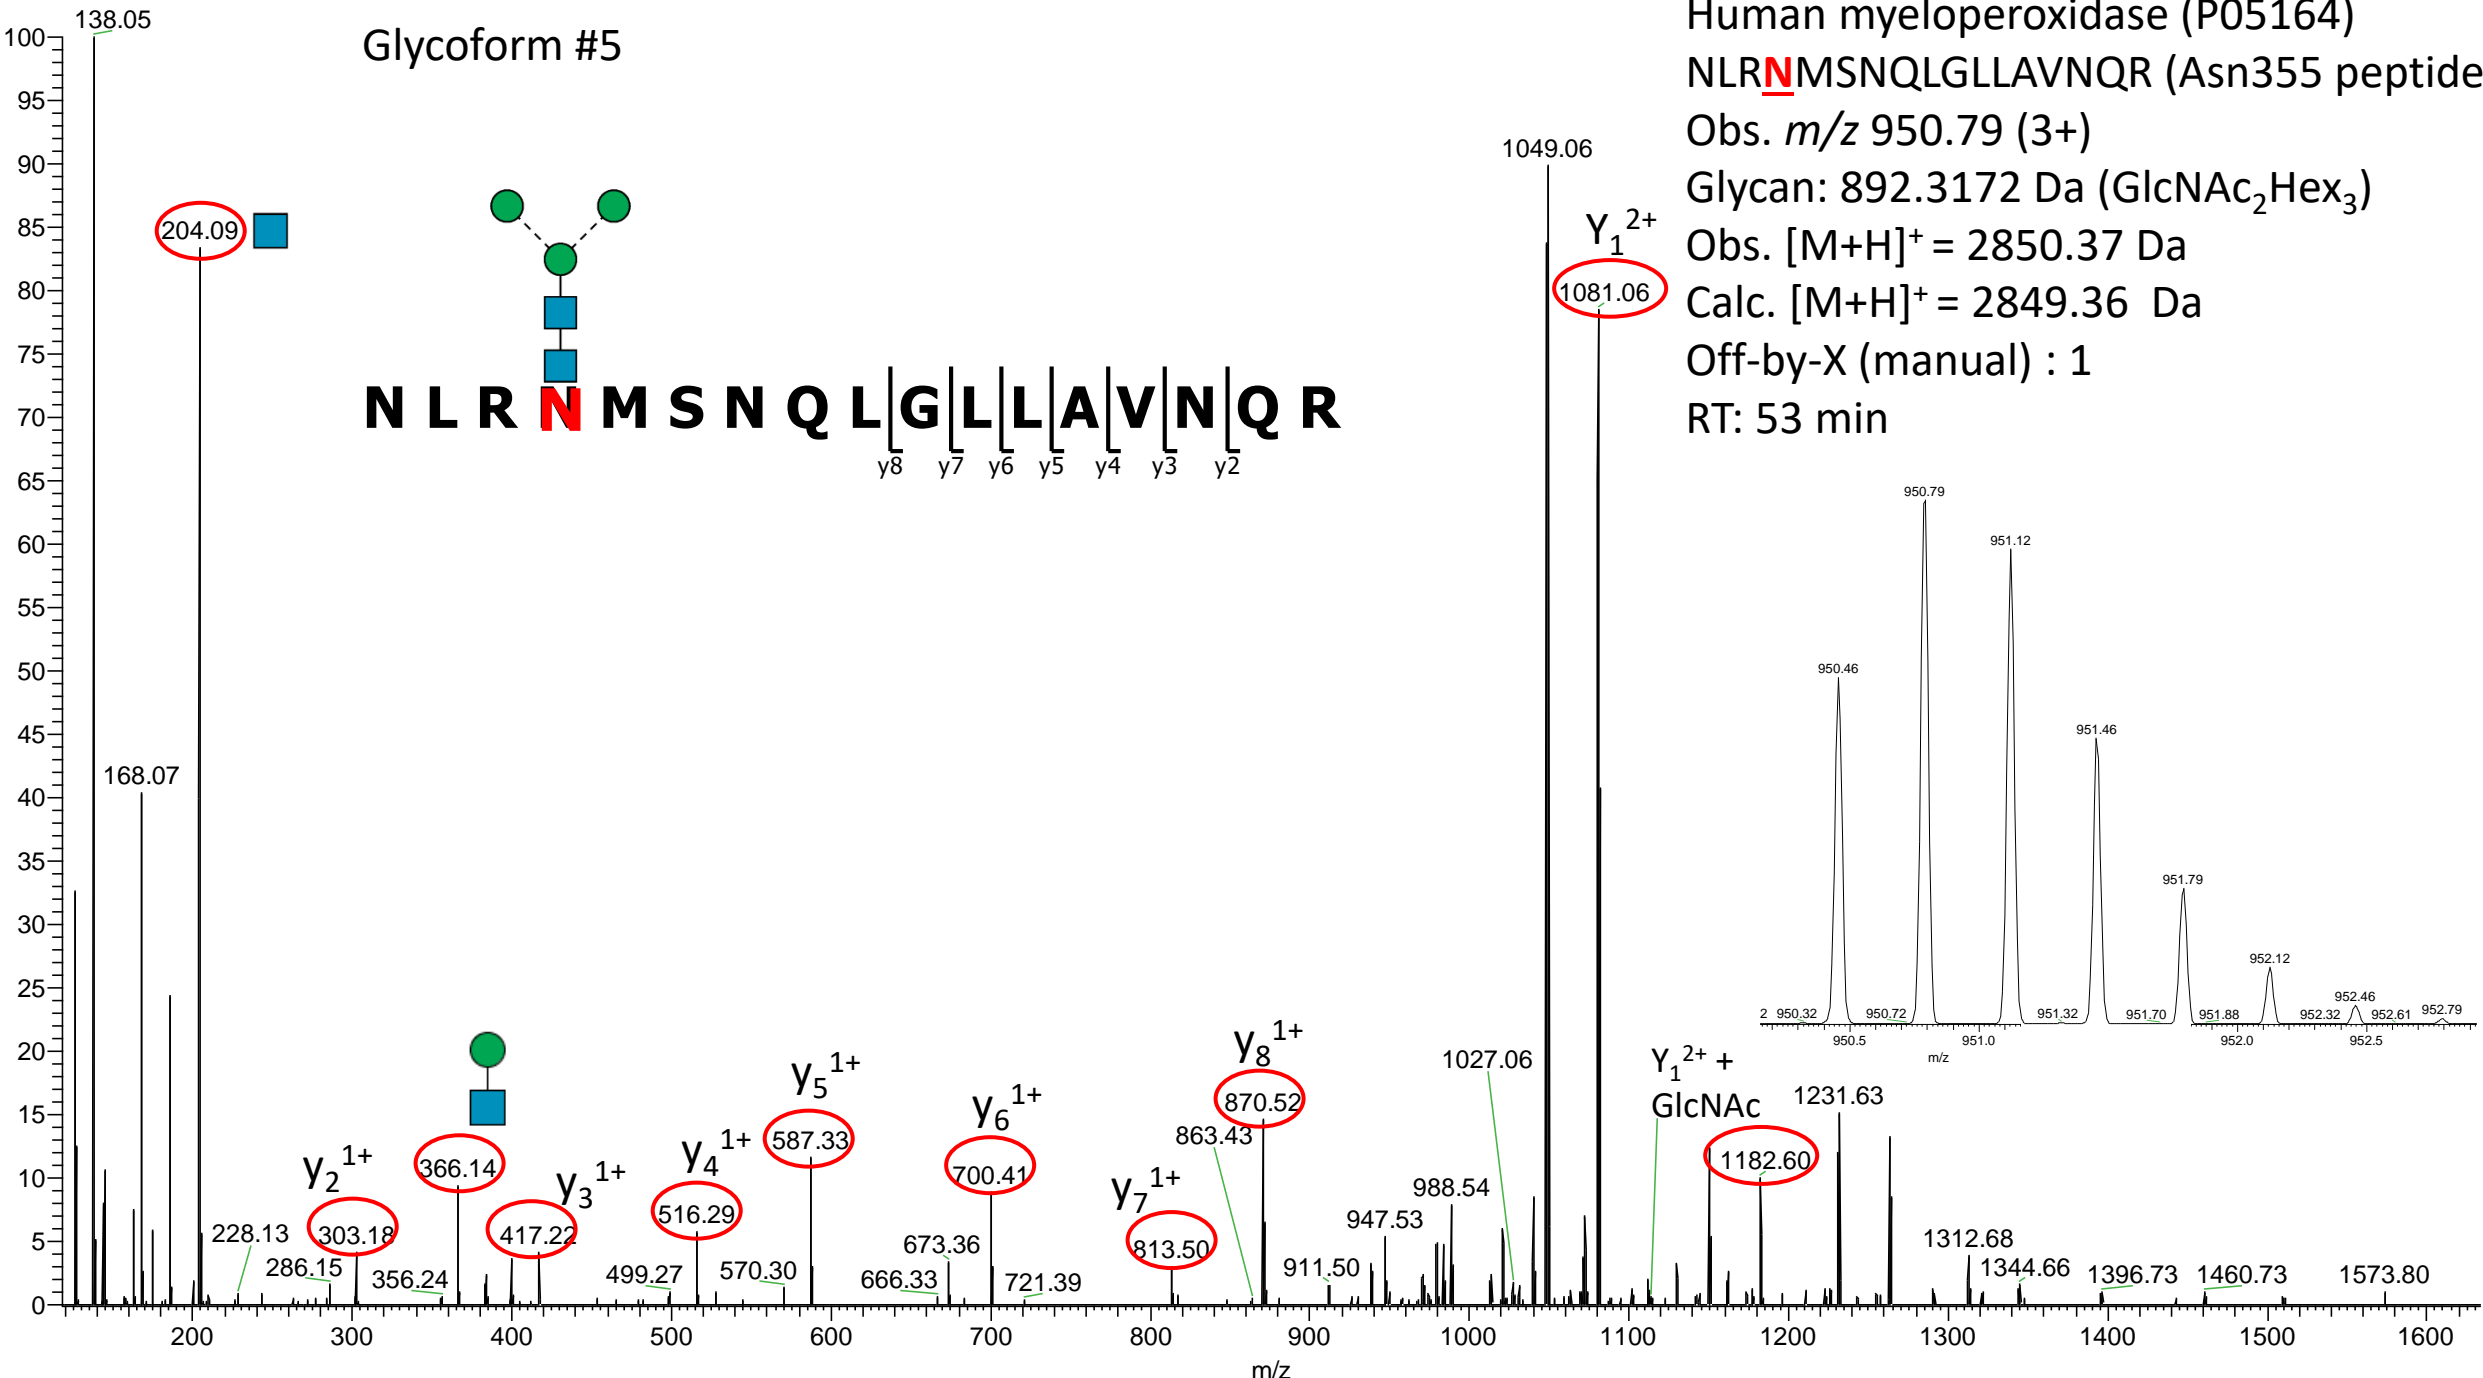

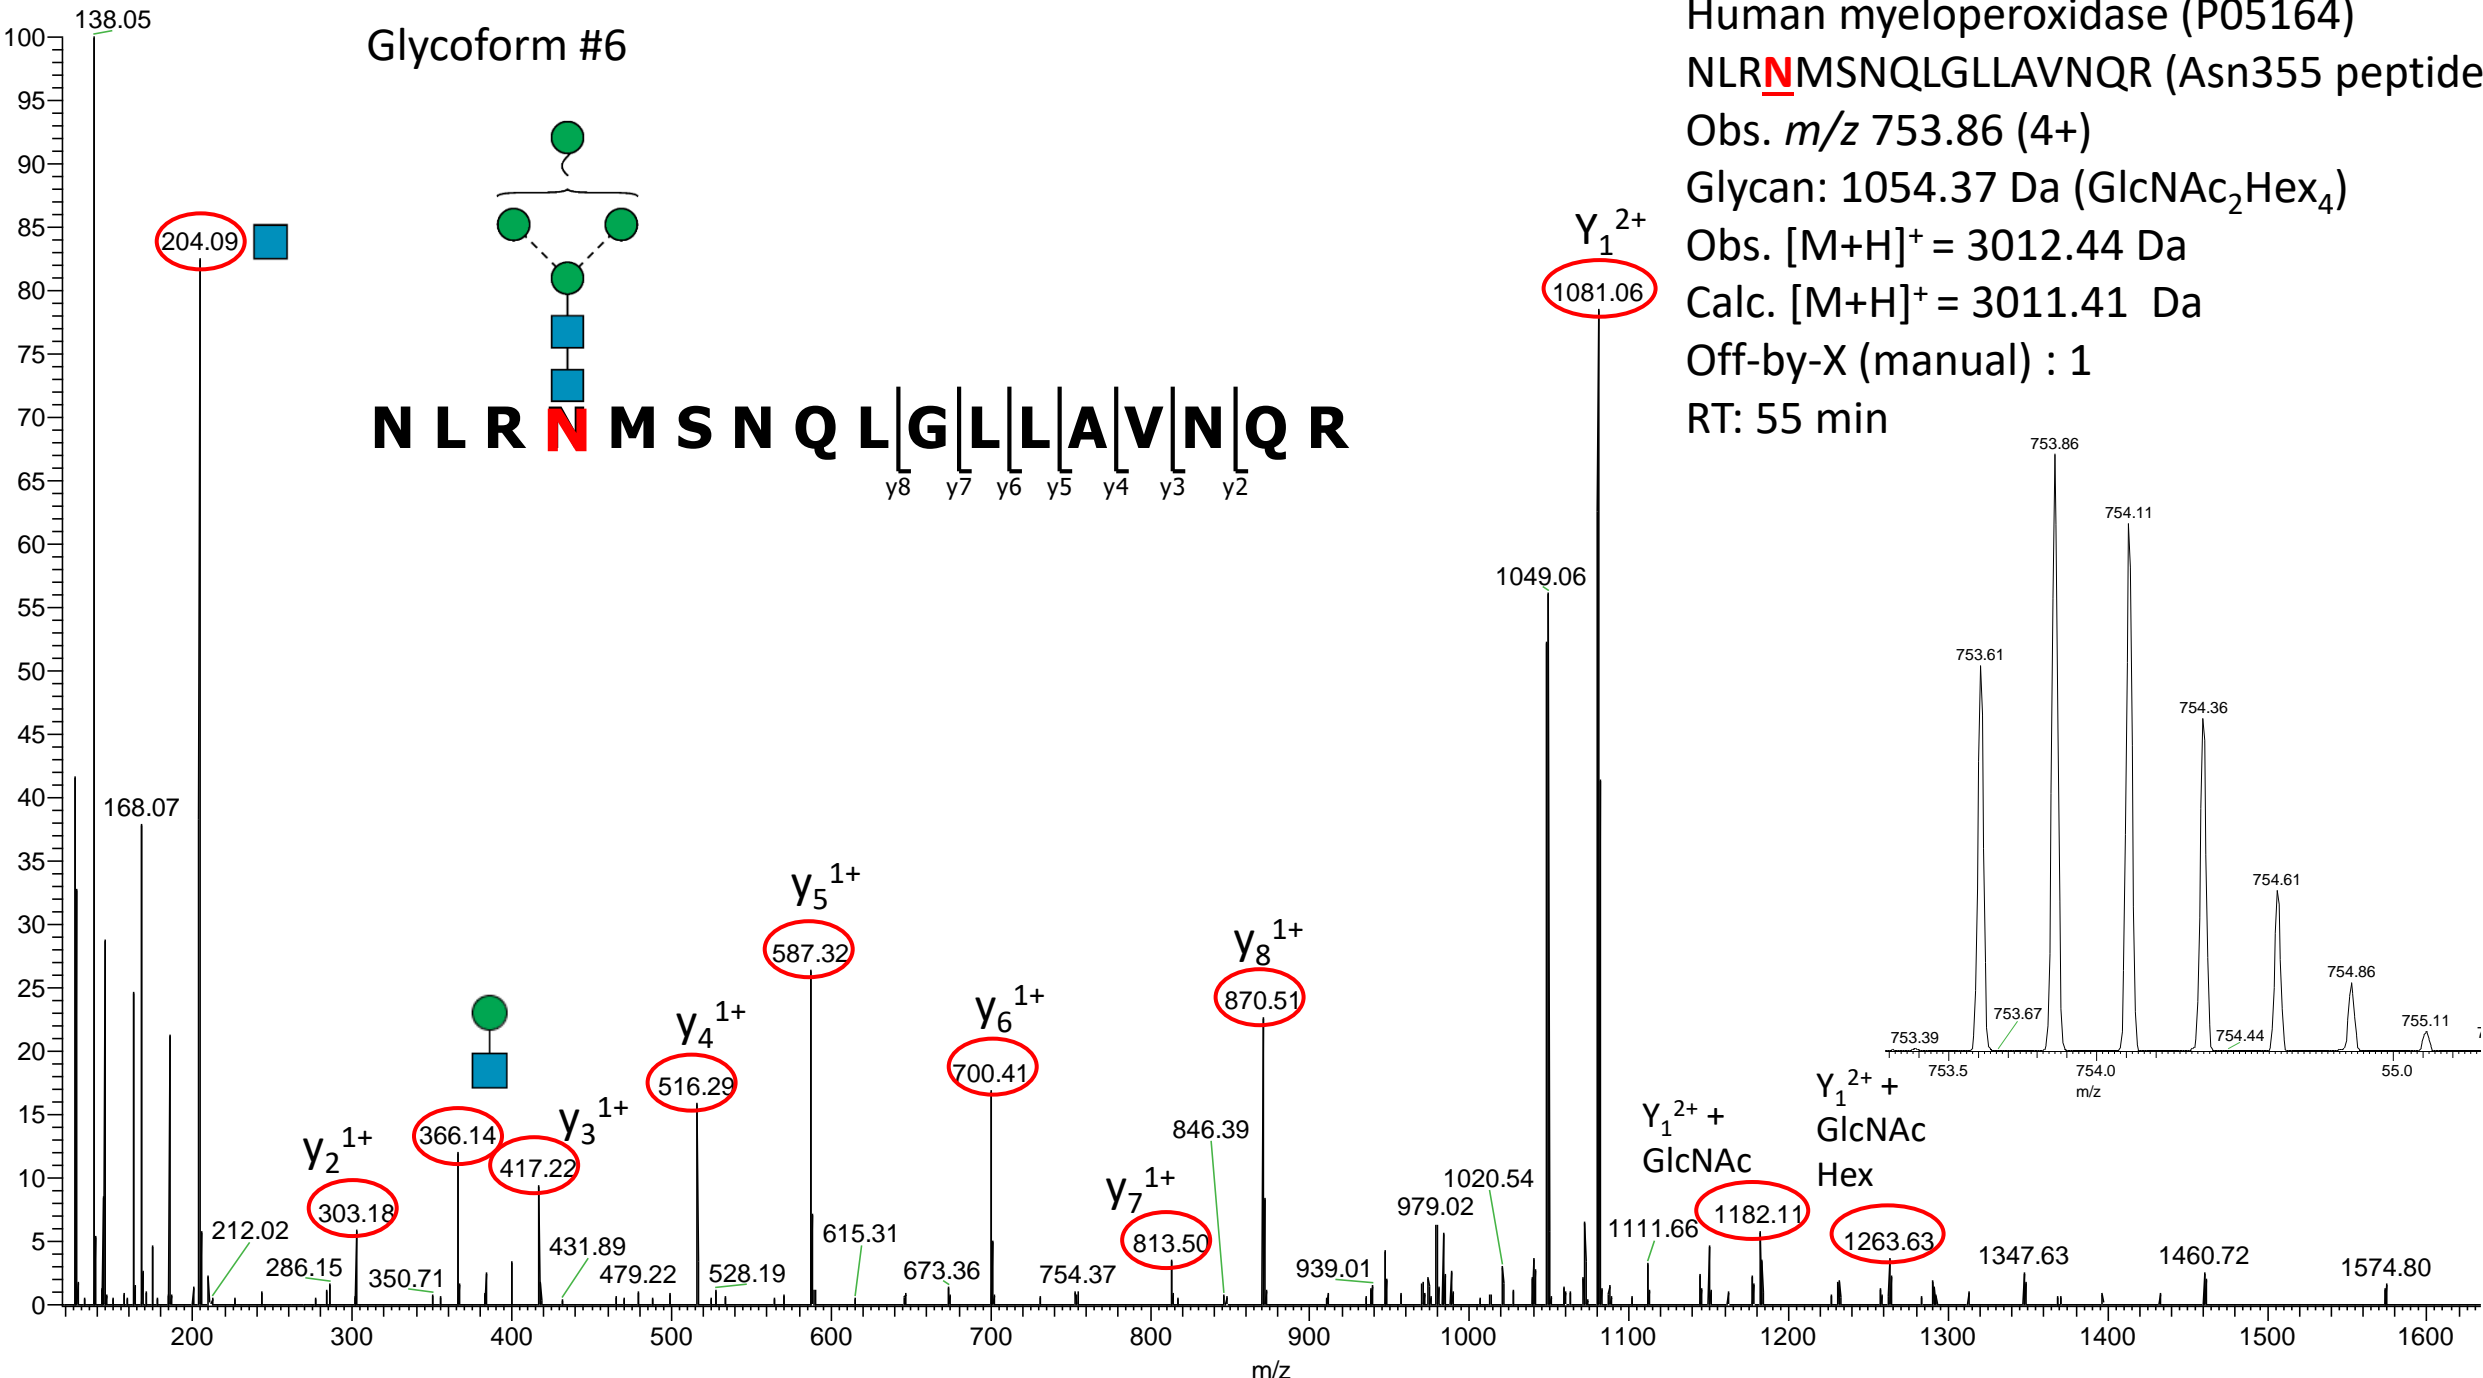



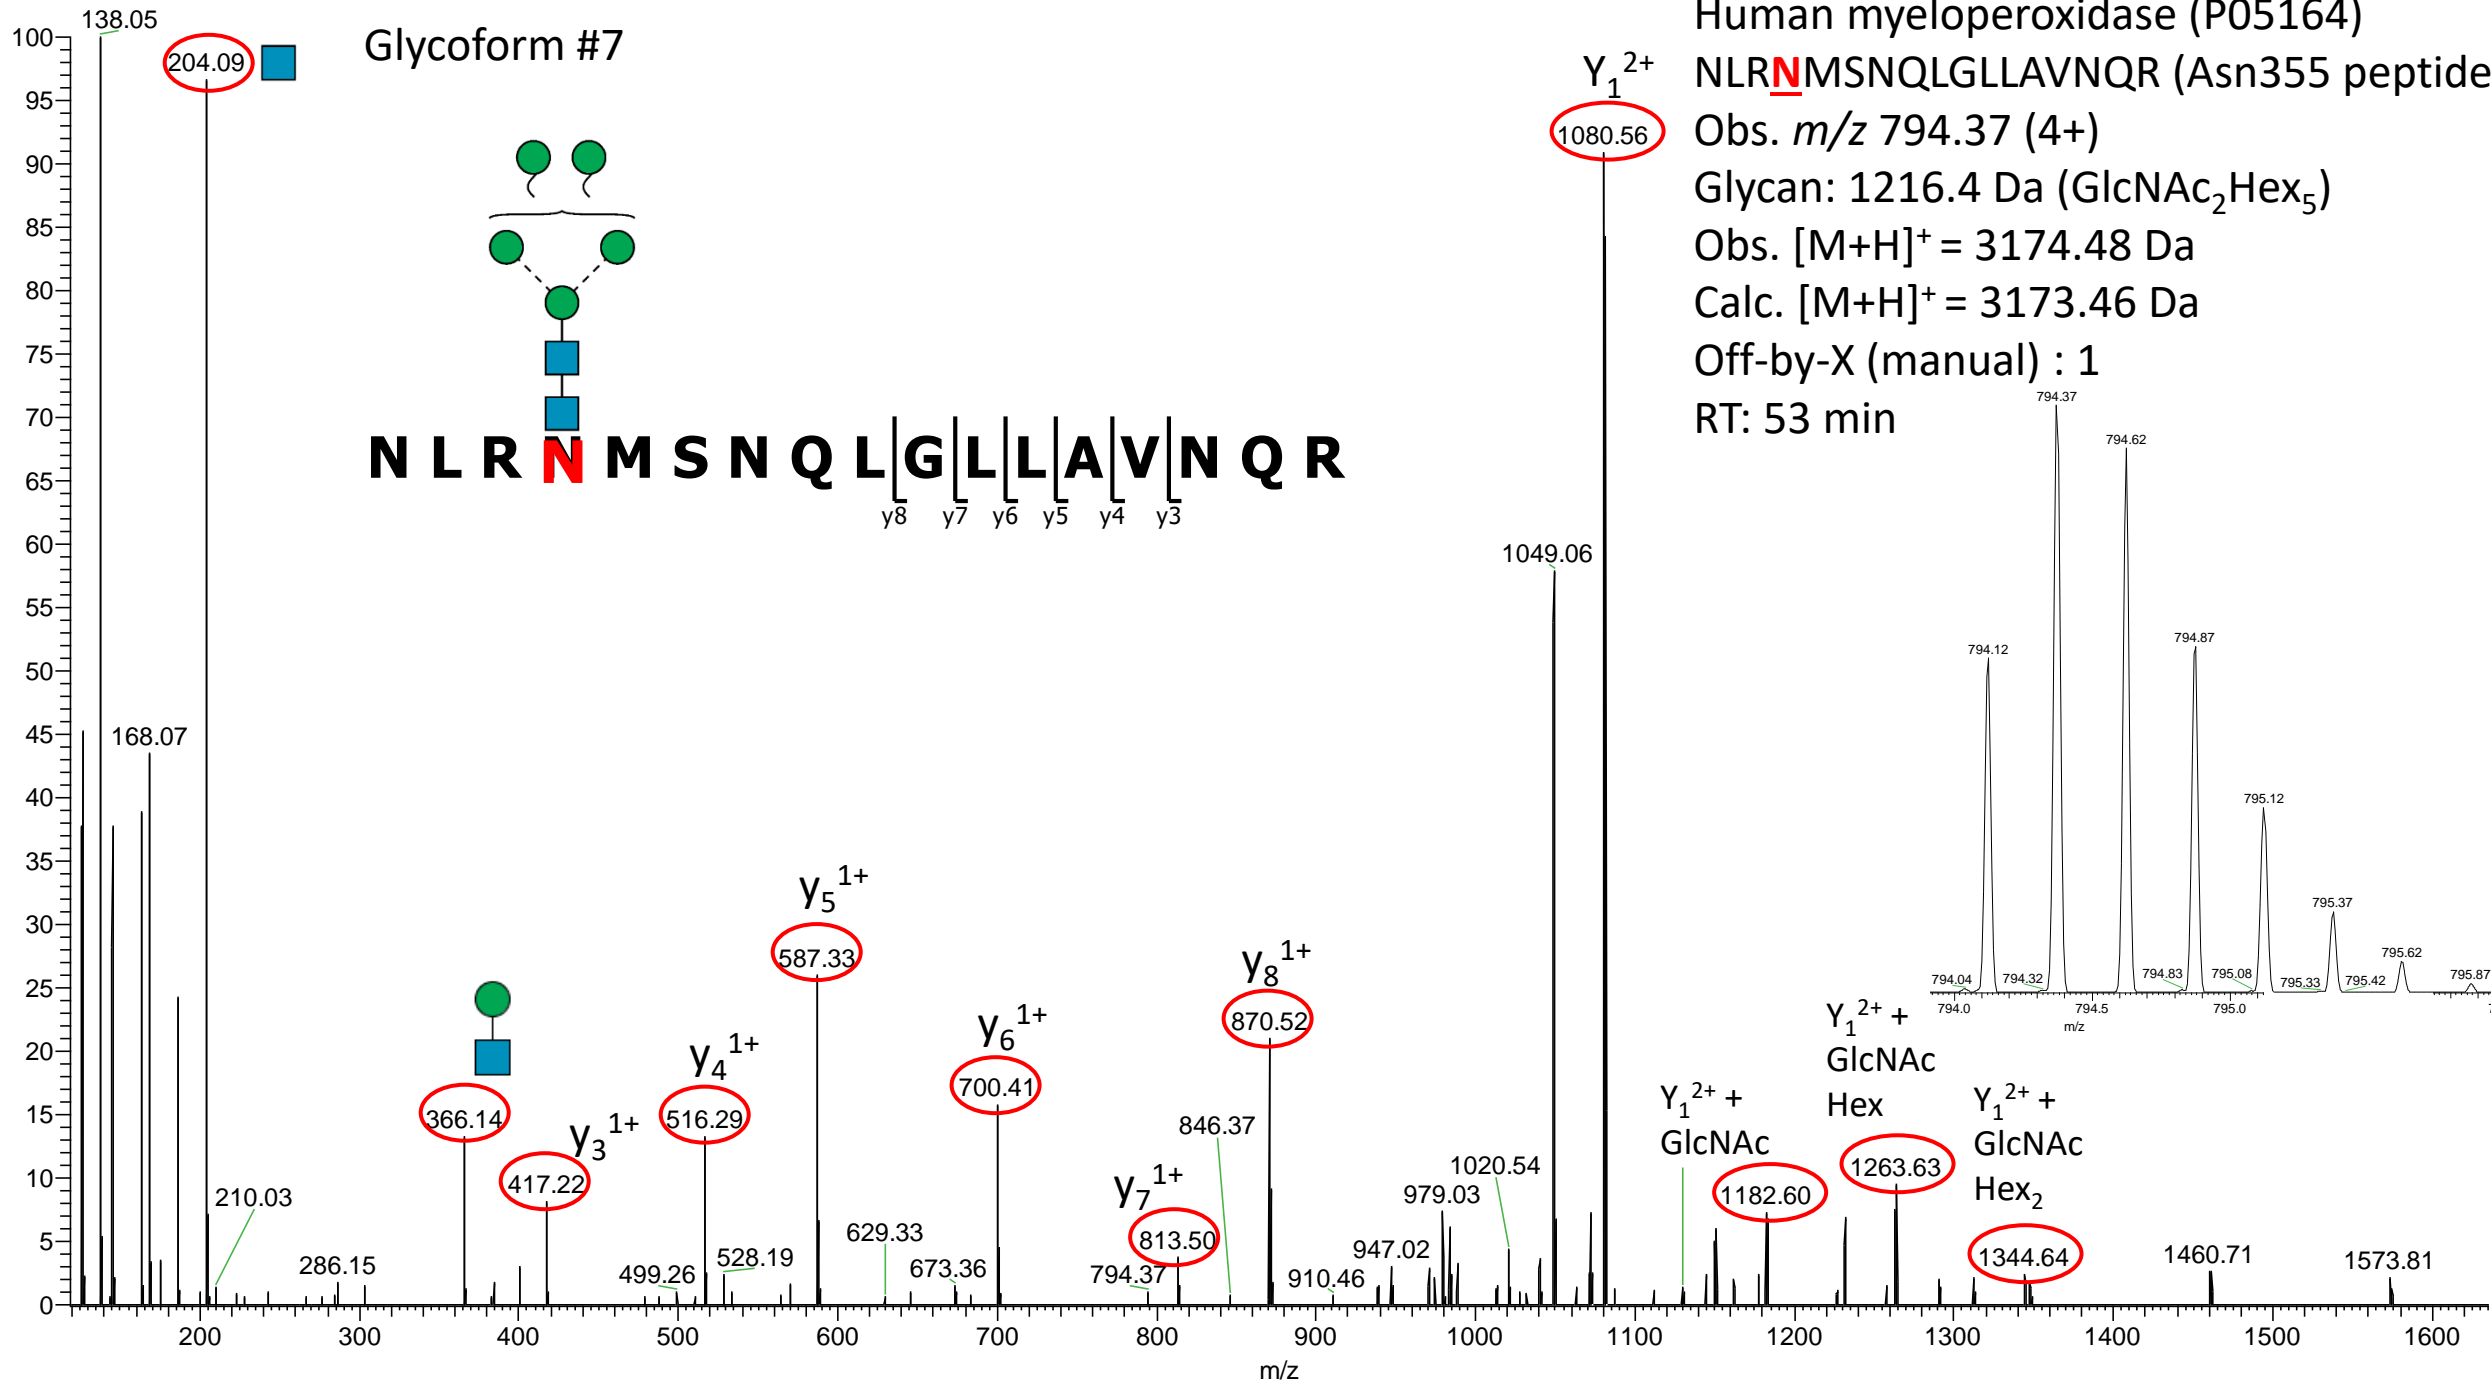

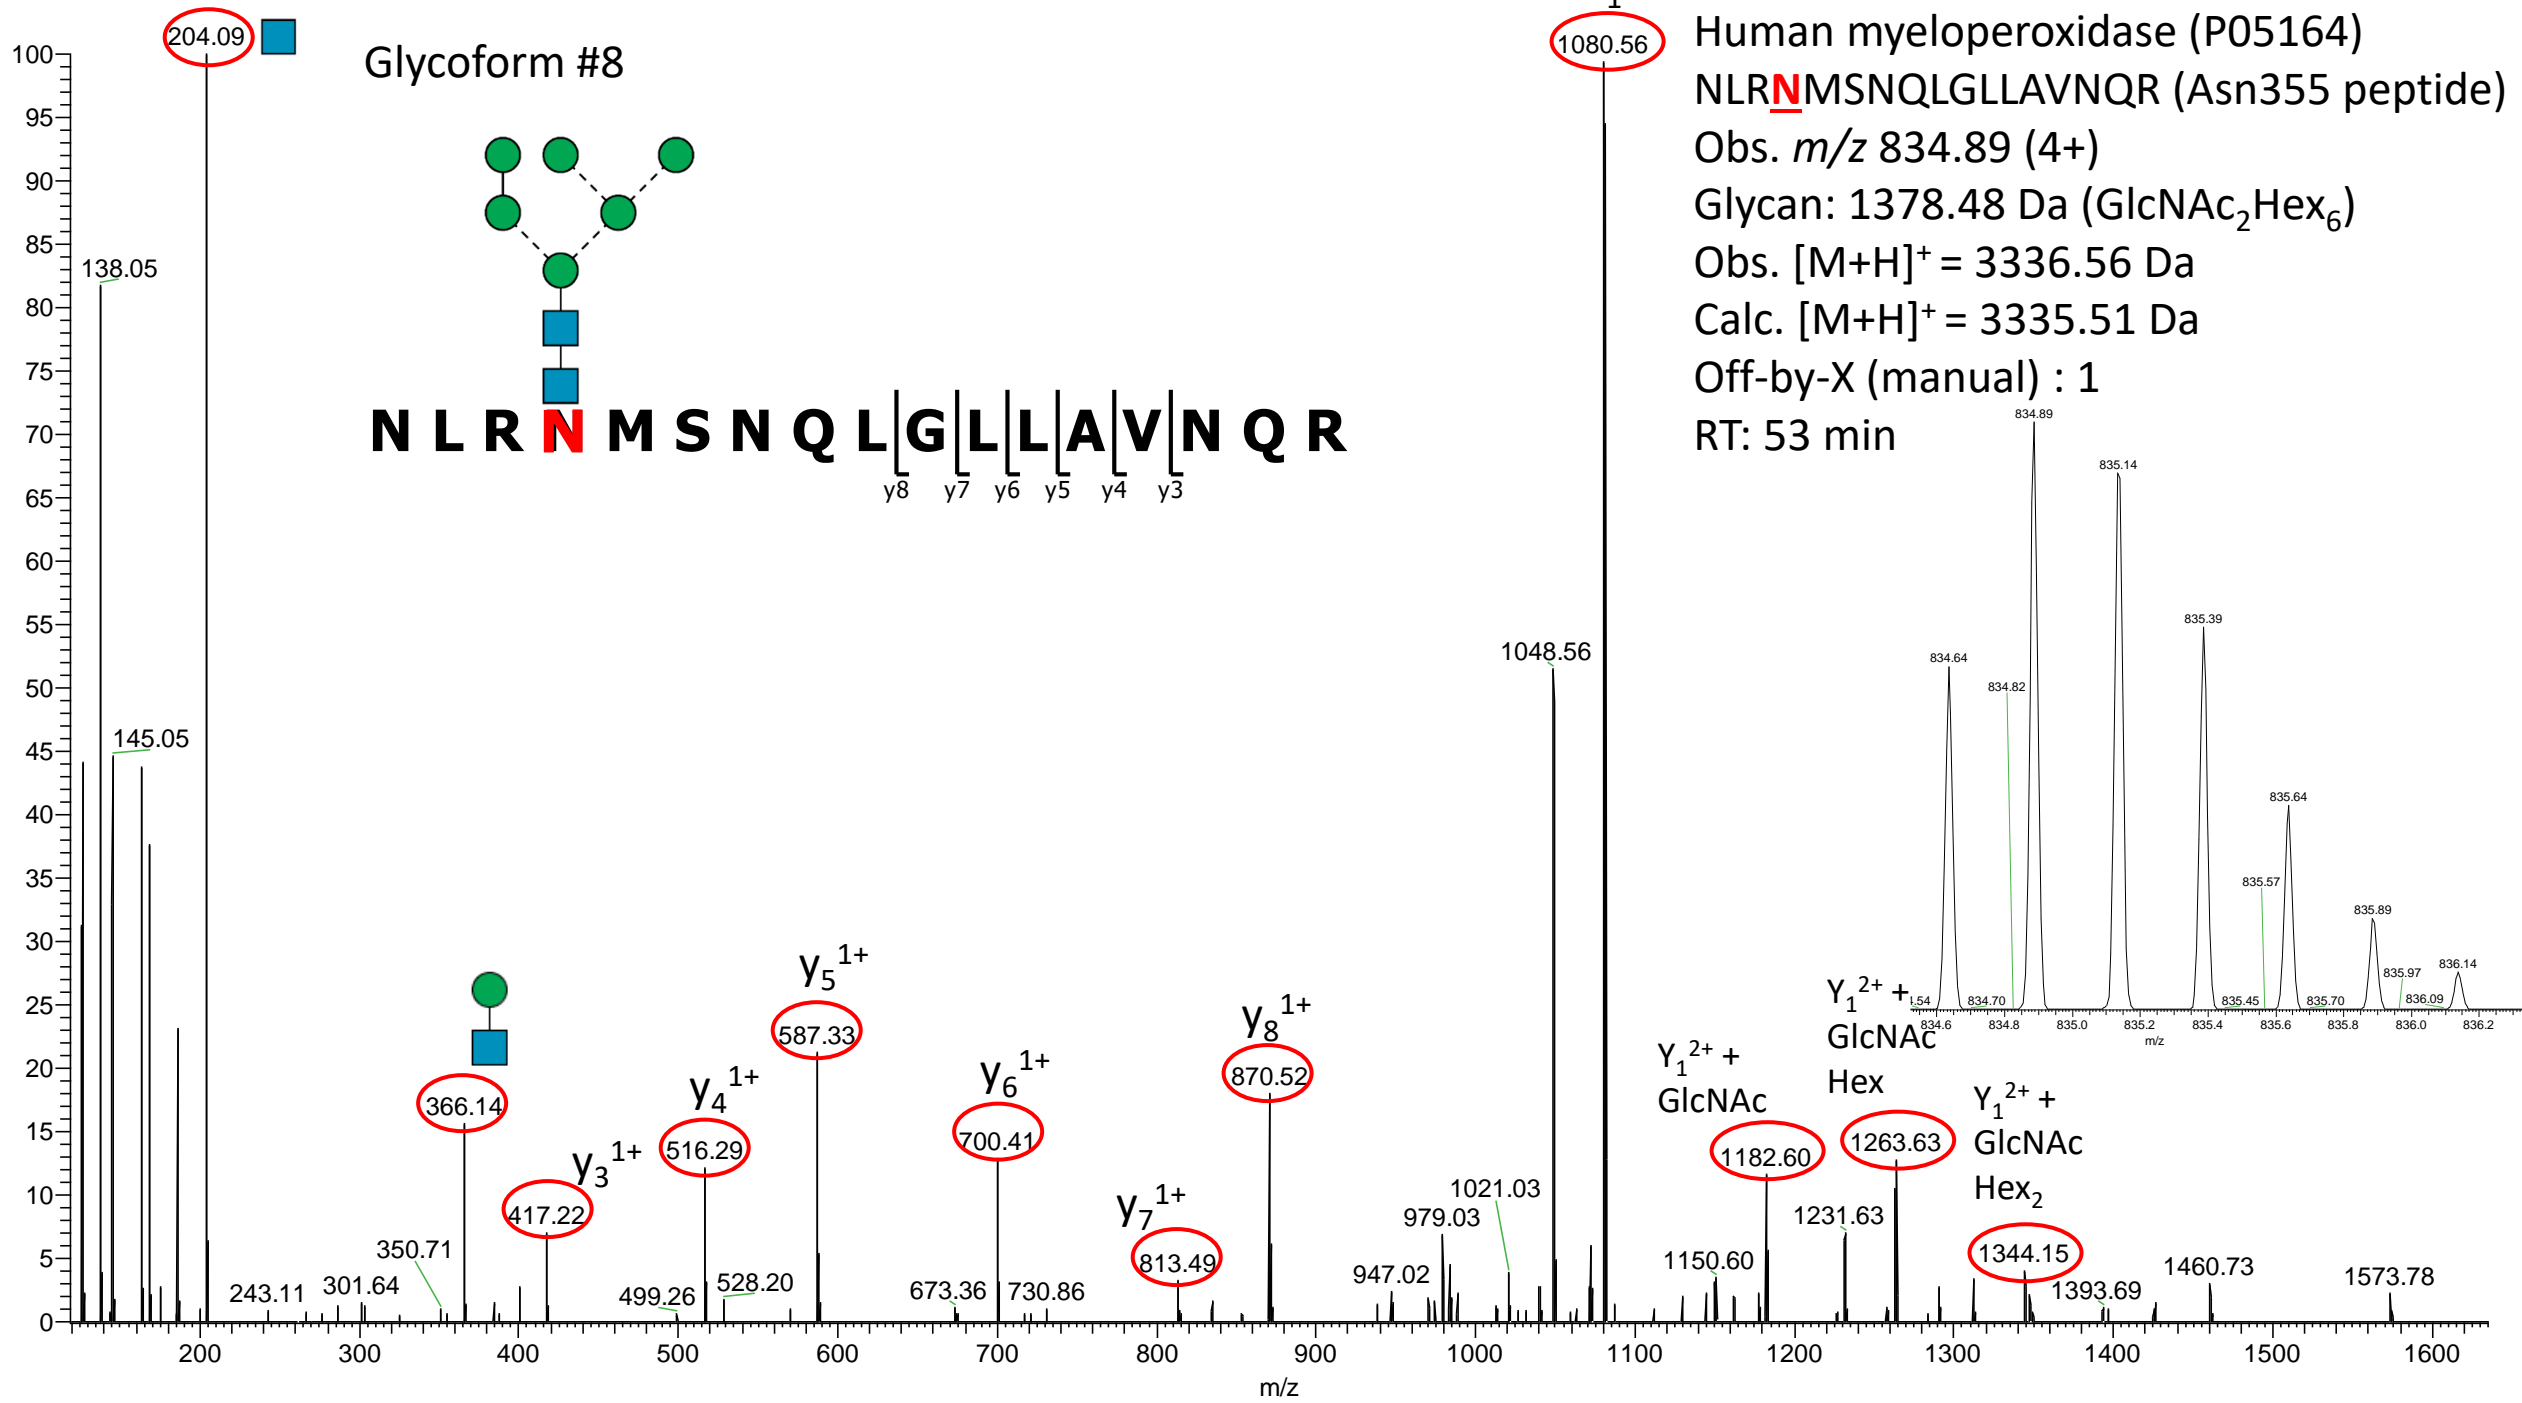



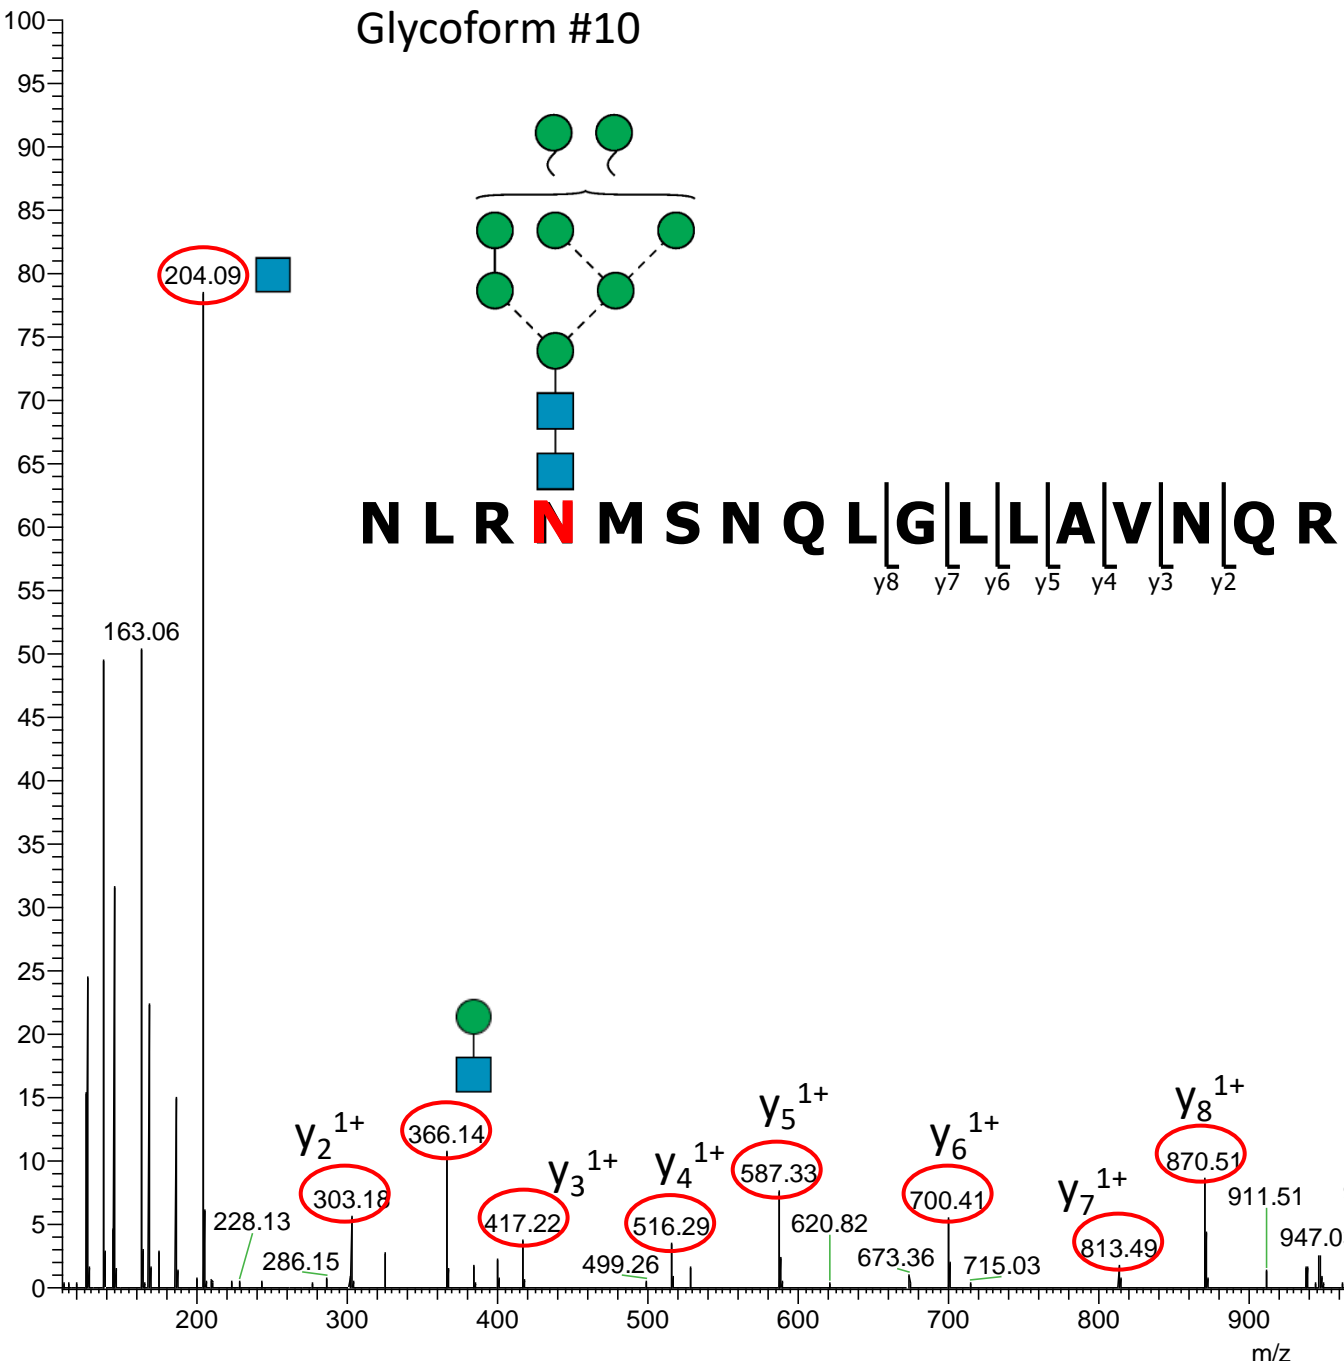

$Y_1^{2+}$  1081.06

Human myeloperoxidase (P05164)  
 NLRNMSNQLGLLAVNQR (Asn355 peptide)  
 Obs.  $m/z$  1221.21 (3+)  
 Glycan: 1702.58 Da (GlcNAc<sub>2</sub>Hex<sub>8</sub>)  
 Obs.  $[M+H]^+$  = 3661.63 Da  
 Calc.  $[M+H]^+$  = 3659.62 Da  
 Off-by-X (manual) : 2  
 RT: 53 min

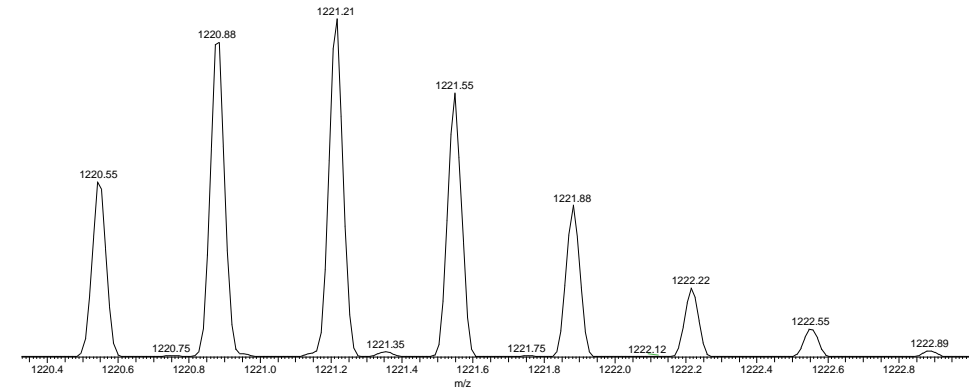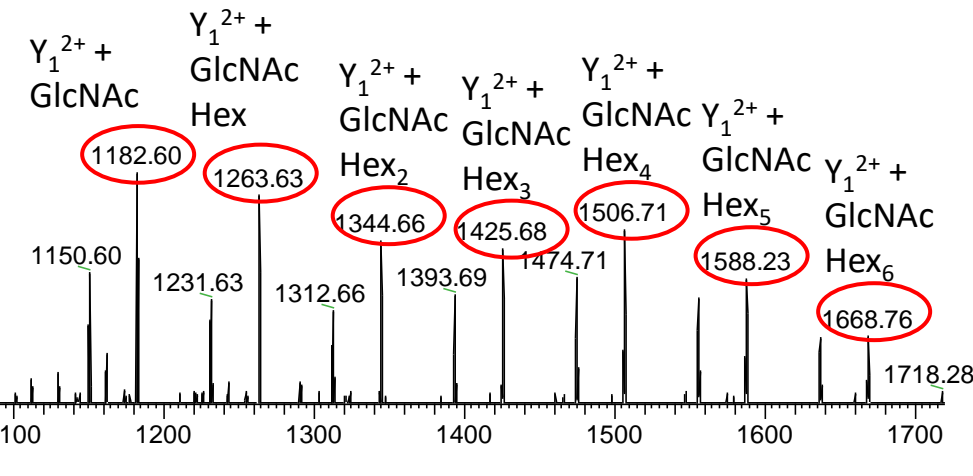

### **Supplementary Data S3C**

Manually annotated reversed phase-LC-ESI-HCD-MS/MS (+) spectra of all glycosylated and non-glycosylated peptides containing Asn391 identified from the analysis of unenriched peptide mixtures of nMPO.

Human myeloperoxidase (P05164)  
ALLPFDNLHDDPCLLTNR (Asn391 peptide)  
Obs.  $m/z$  708.69 (+3)  
Obs.  $[M+H]^+ = 2124.07$  Da  
Calc.  $[M+H]^+ = 2124.05$  Da  
RT: 81 min

Non-glycosylated peptide

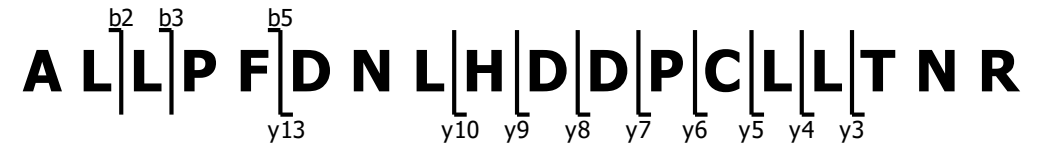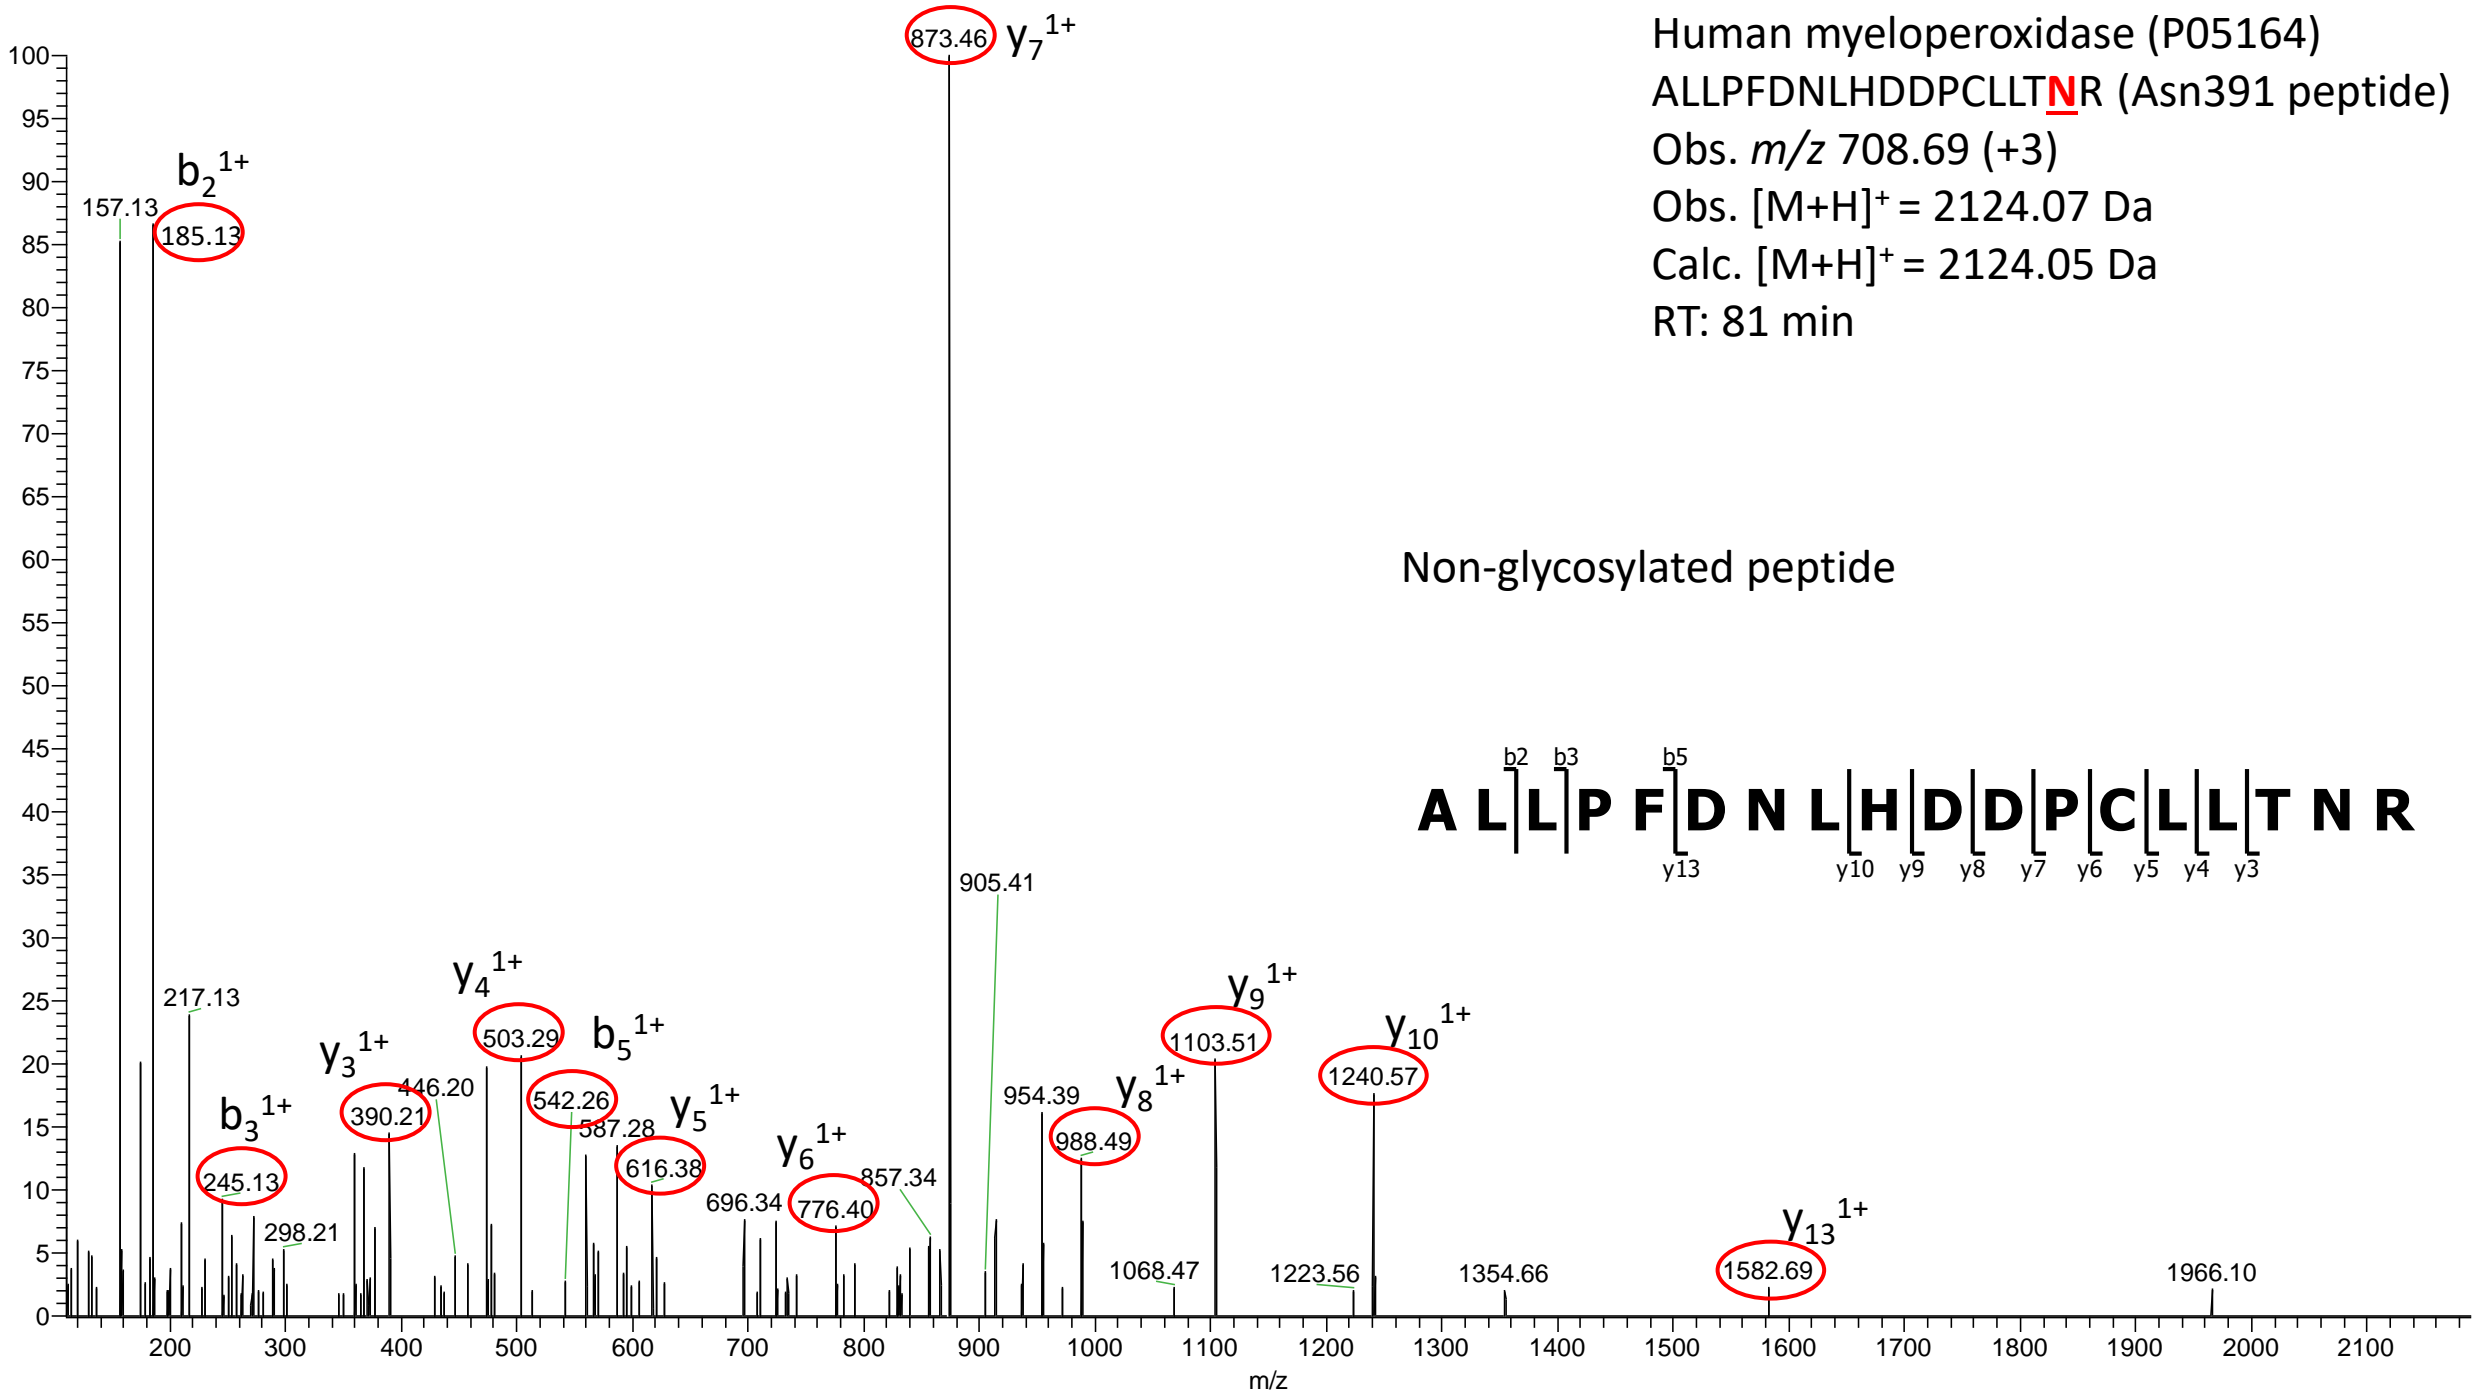

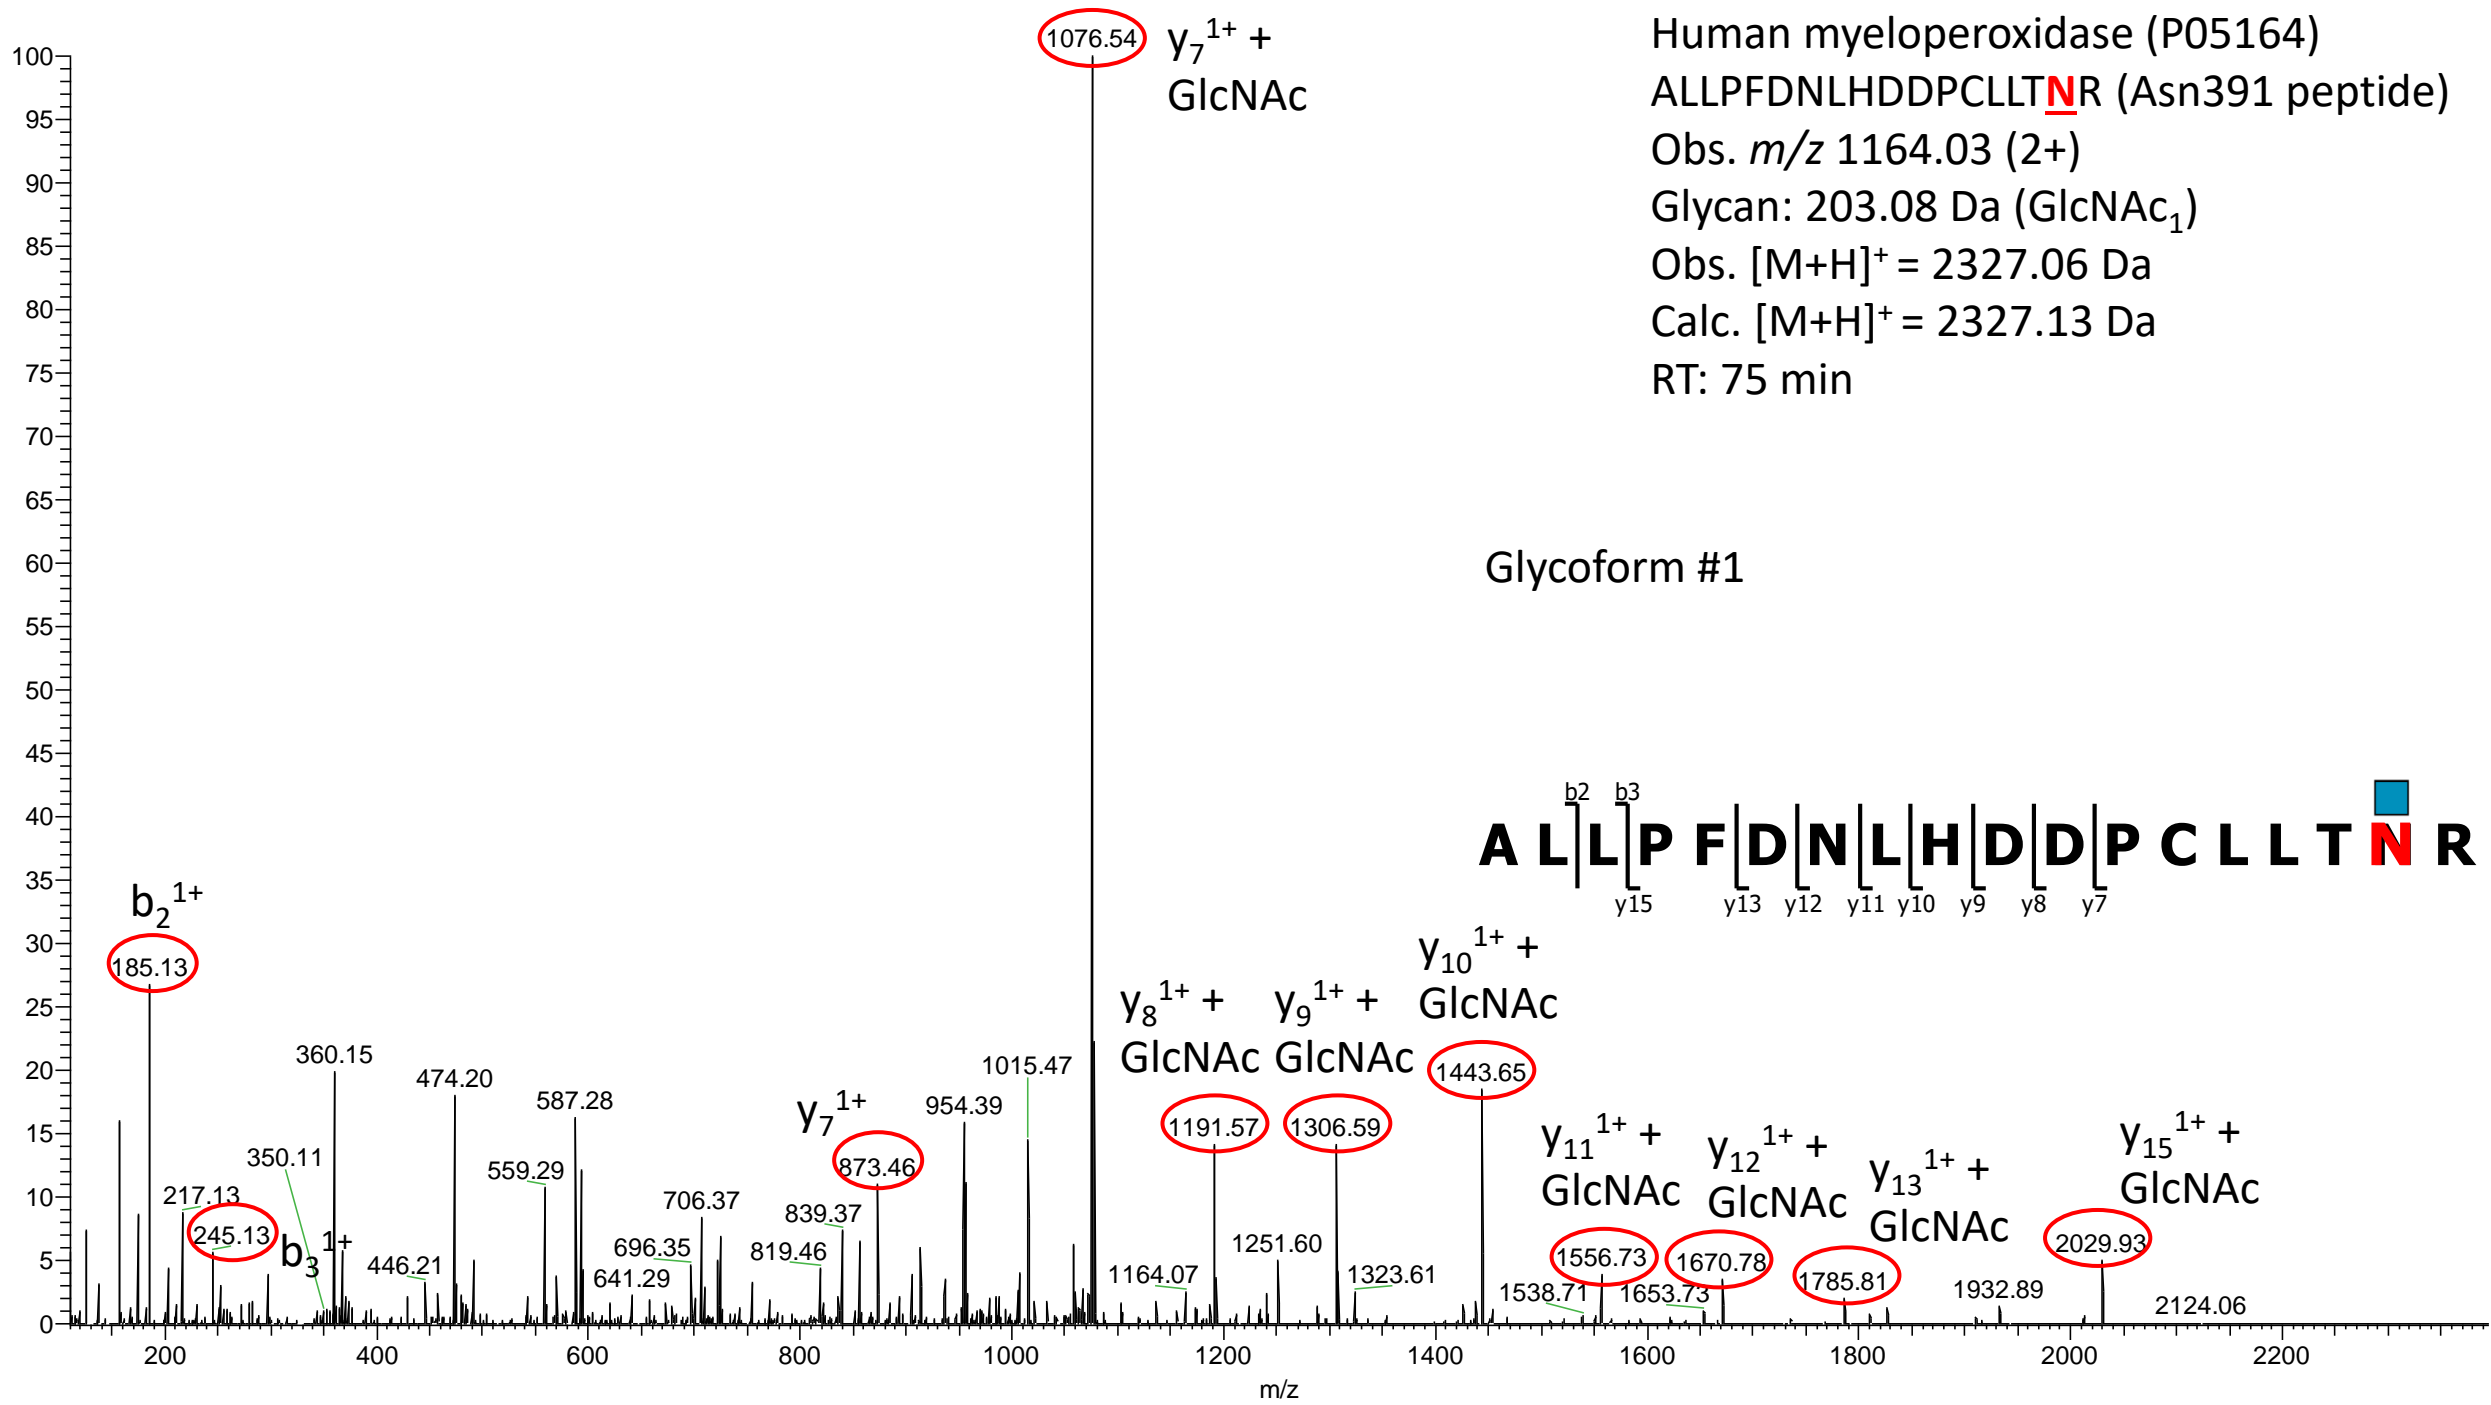

Human myeloperoxidase (P05164)  
ALLPFDNLHDDPCLLT**N**R (Asn391 peptide)  
Obs.  $m/z$  844.03 (3+)  
Glycan: 406.16 Da (GlcNAc<sub>2</sub>)  
Obs.  $[M+H]^+$  = 2530.09 Da  
Calc.  $[M+H]^+$  = 2530.21 Da  
RT: 80 min

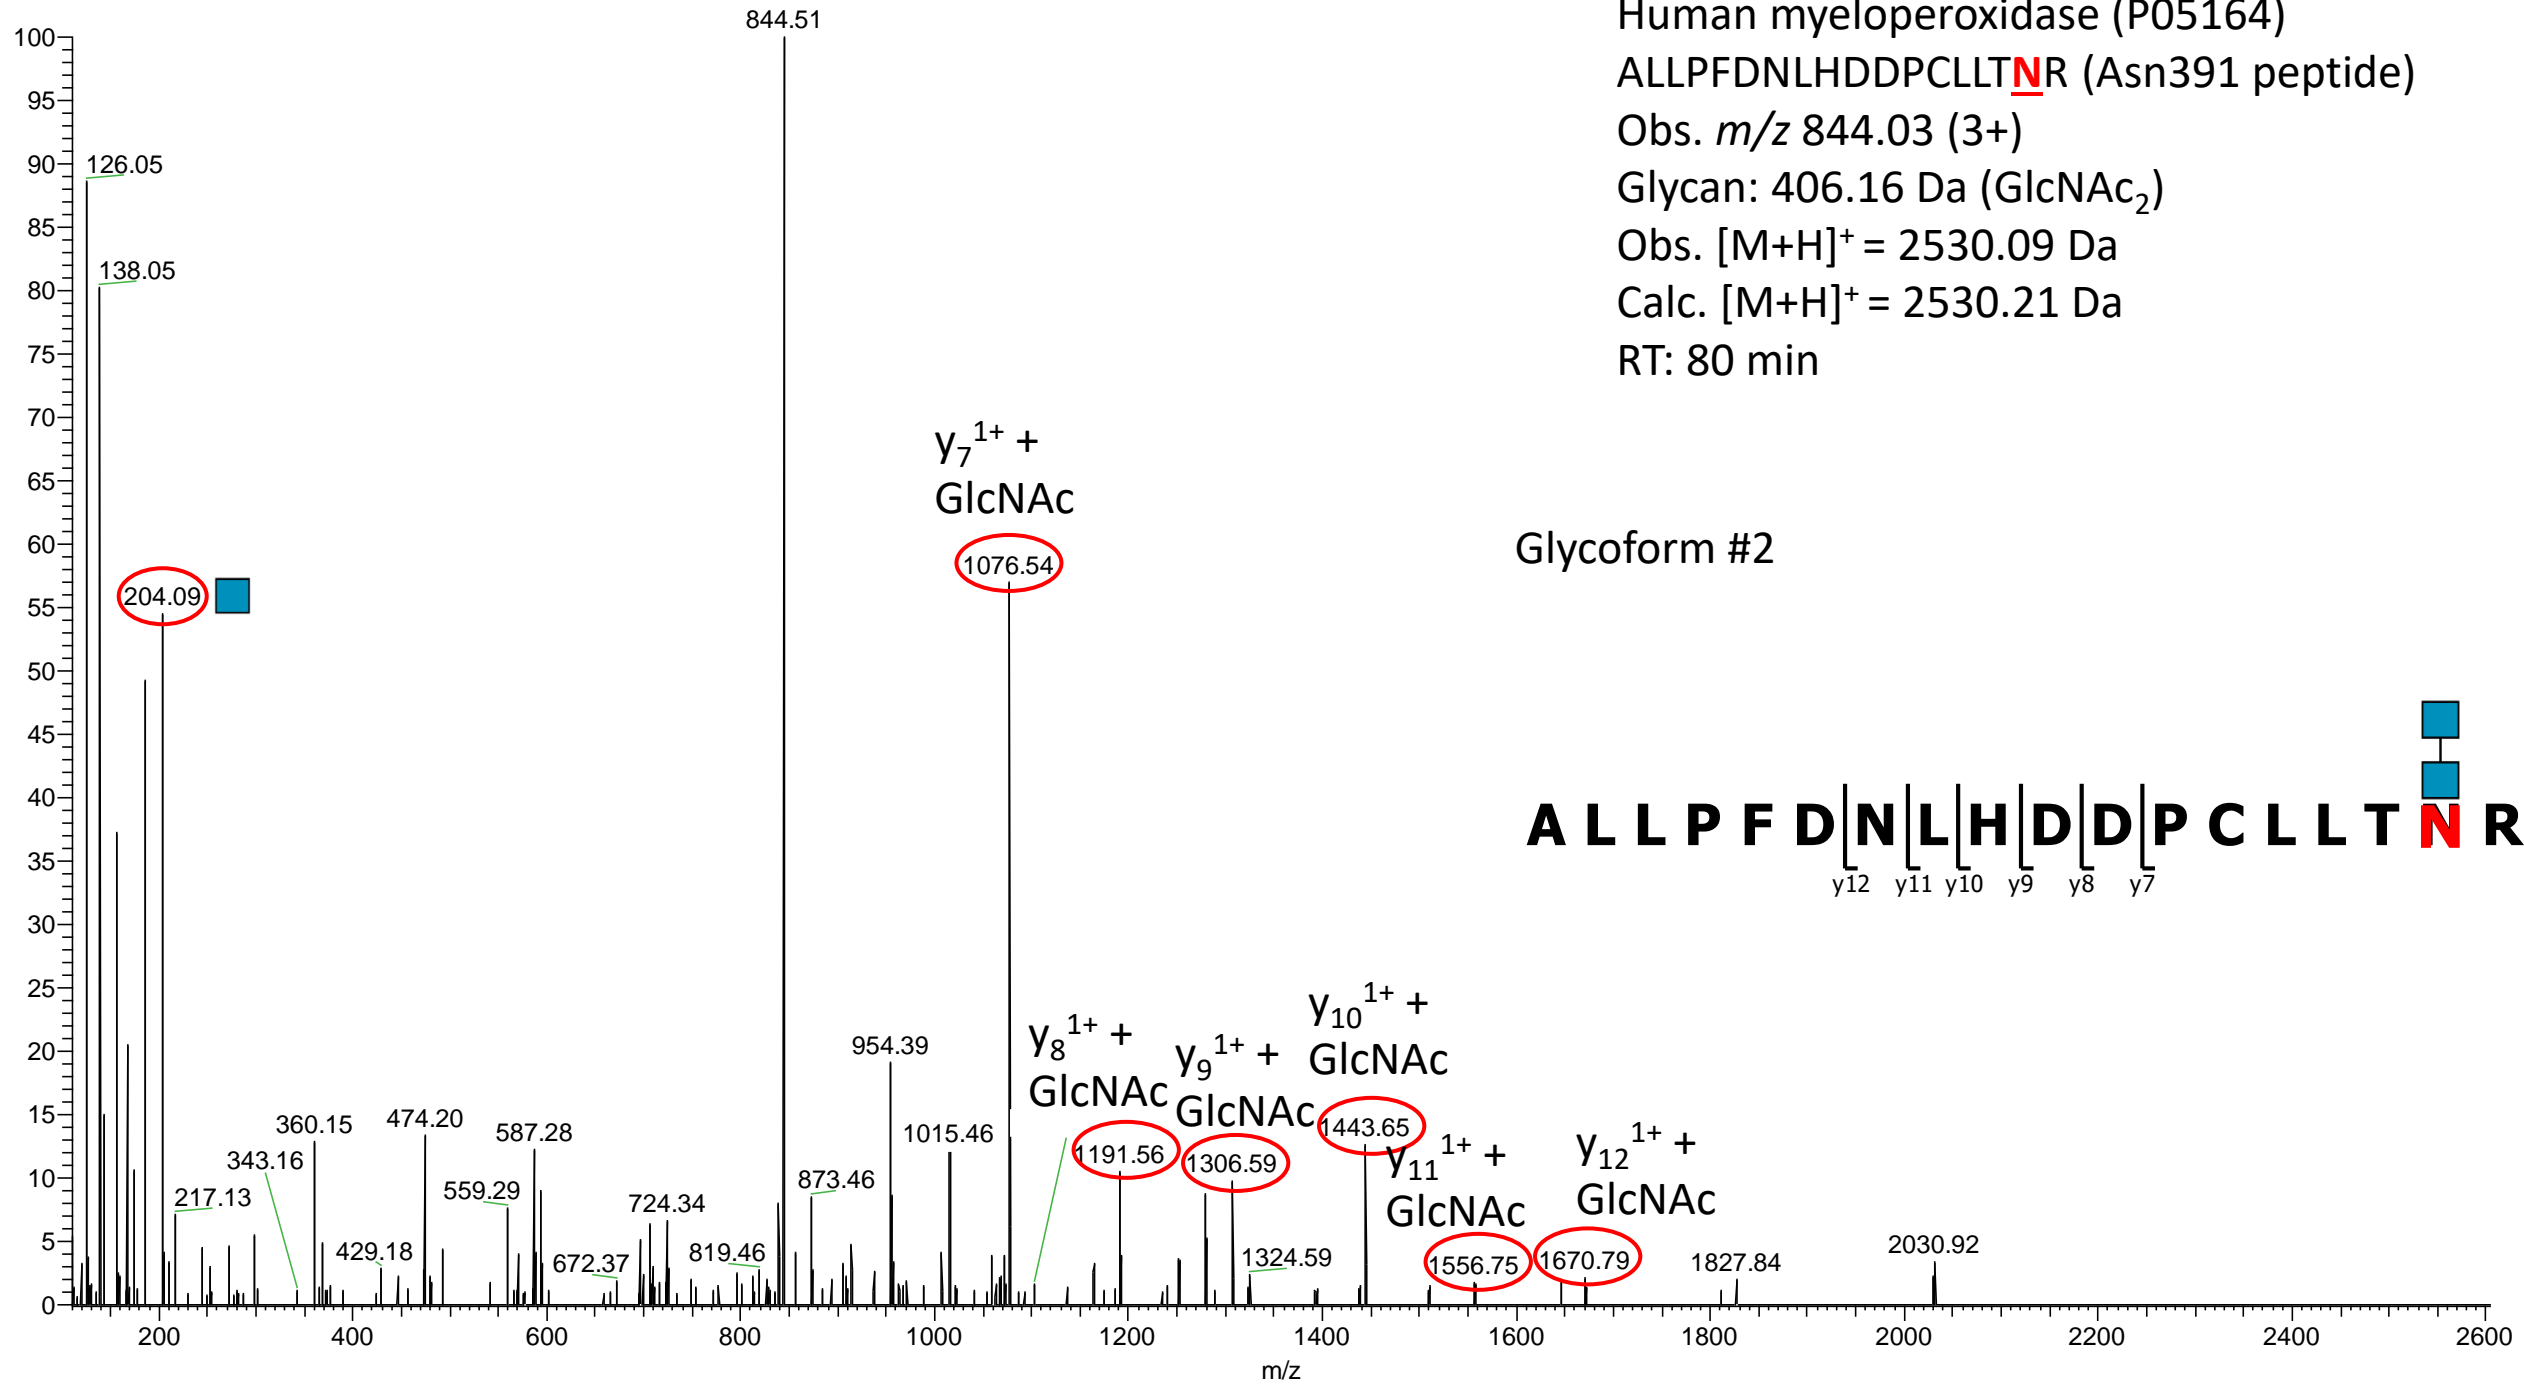



Human myeloperoxidase (P05164)  
 ALLPFDNLHDDPCLLT**N**R (Asn391 peptide)  
 Obs.  $m/z$  898.09 (3+)  
 Glycan: 568.21 Da (GlcNAc<sub>2</sub>Hex<sub>1</sub>)  
 Obs.  $[M+H]^+$  = 2692.18 Da  
 Calc.  $[M+H]^+$  = 2692.26 Da  
 RT: 77 min

Glycoform #3

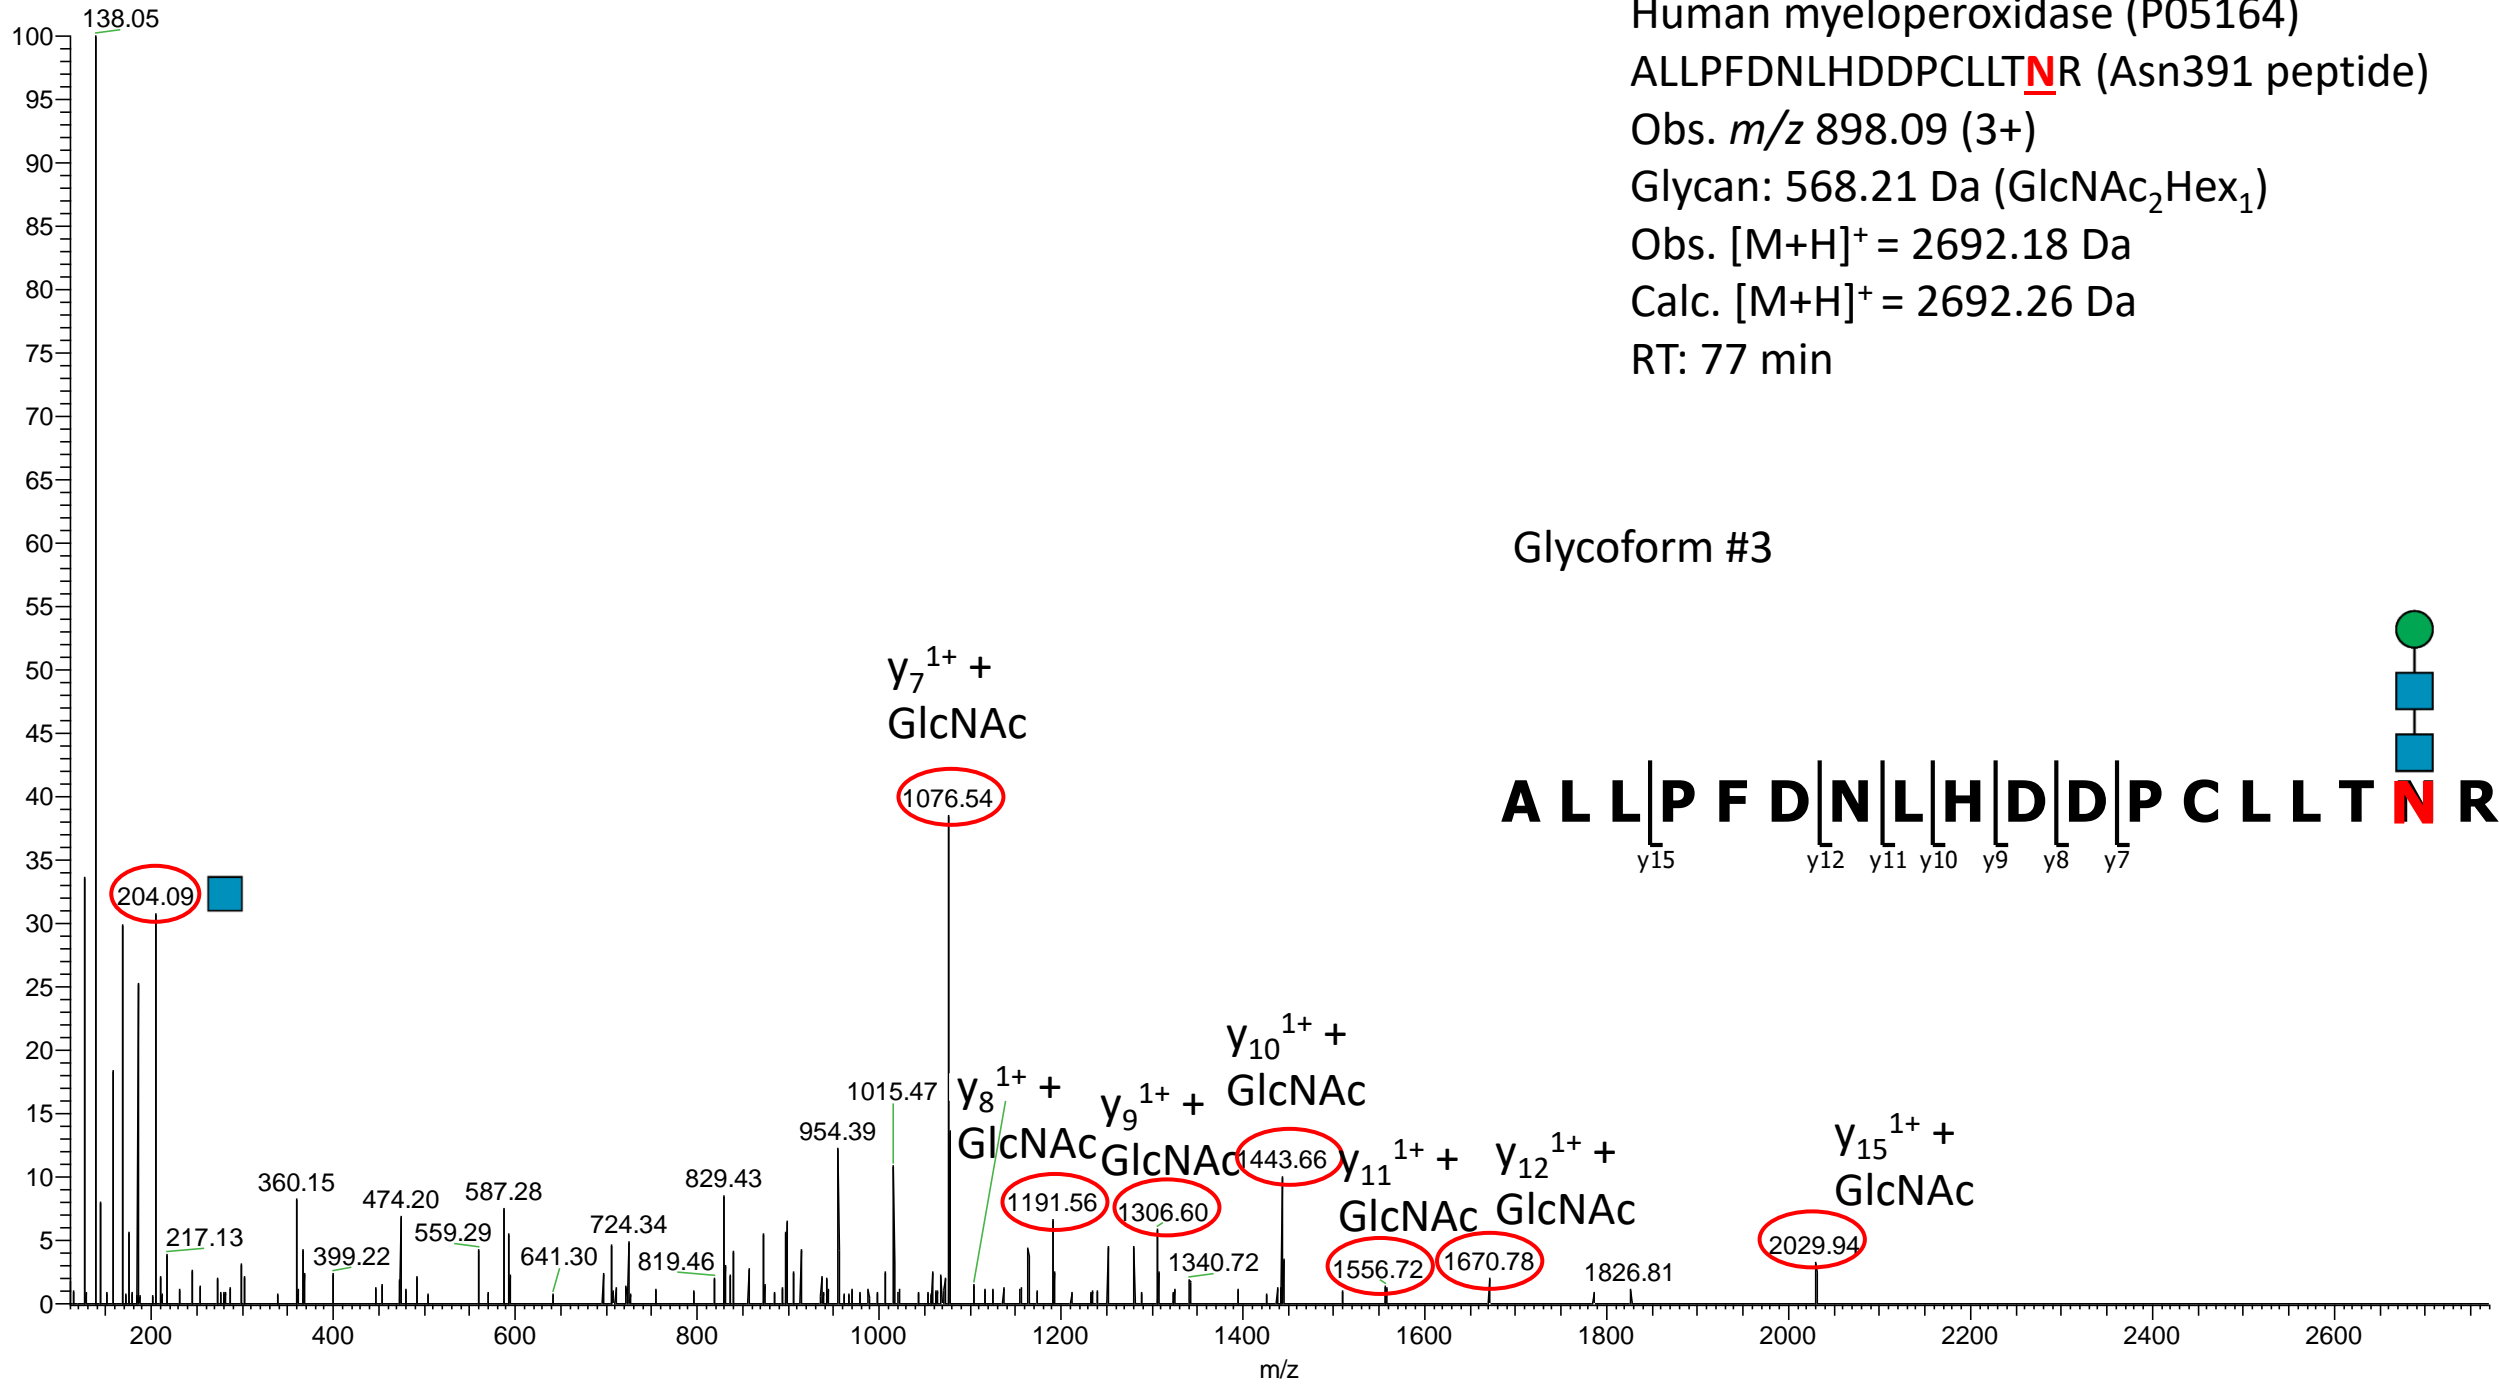

Human myeloperoxidase (P05164)  
ALLPFDNLHDDPCLLTNR (Asn391 peptide)

Obs.  $m/z$  952.45 (3+)

Glycan: 730.26 Da (GlcNAc<sub>2</sub>Hex<sub>2</sub>)

Obs.  $[M+H]^+$  = 2855.35 Da

Calc.  $[M+H]^+$  = 2854.31 Da

Off-by-X (manual) : 1

RT: 78 min

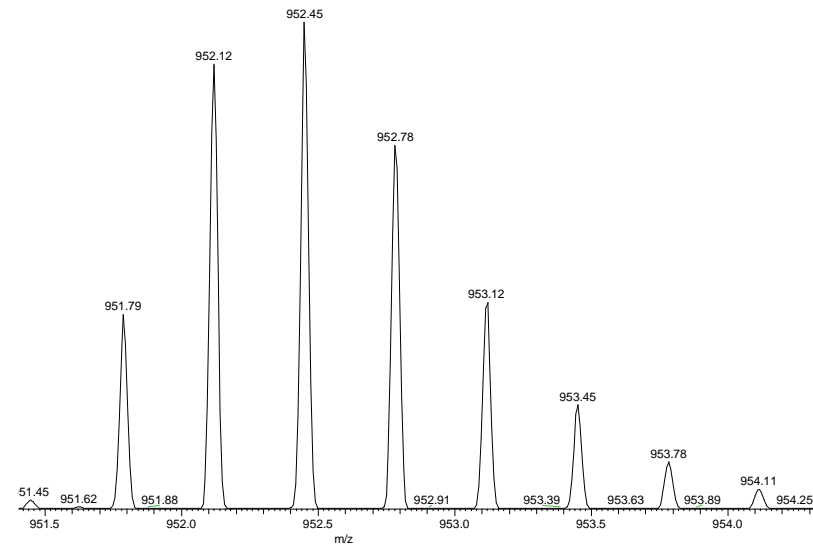

Glycoform #4

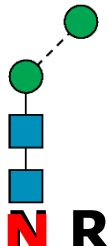

ALLPFDNLHDDPCLLTNR  
b<sub>11</sub> |  
y<sub>7</sub>

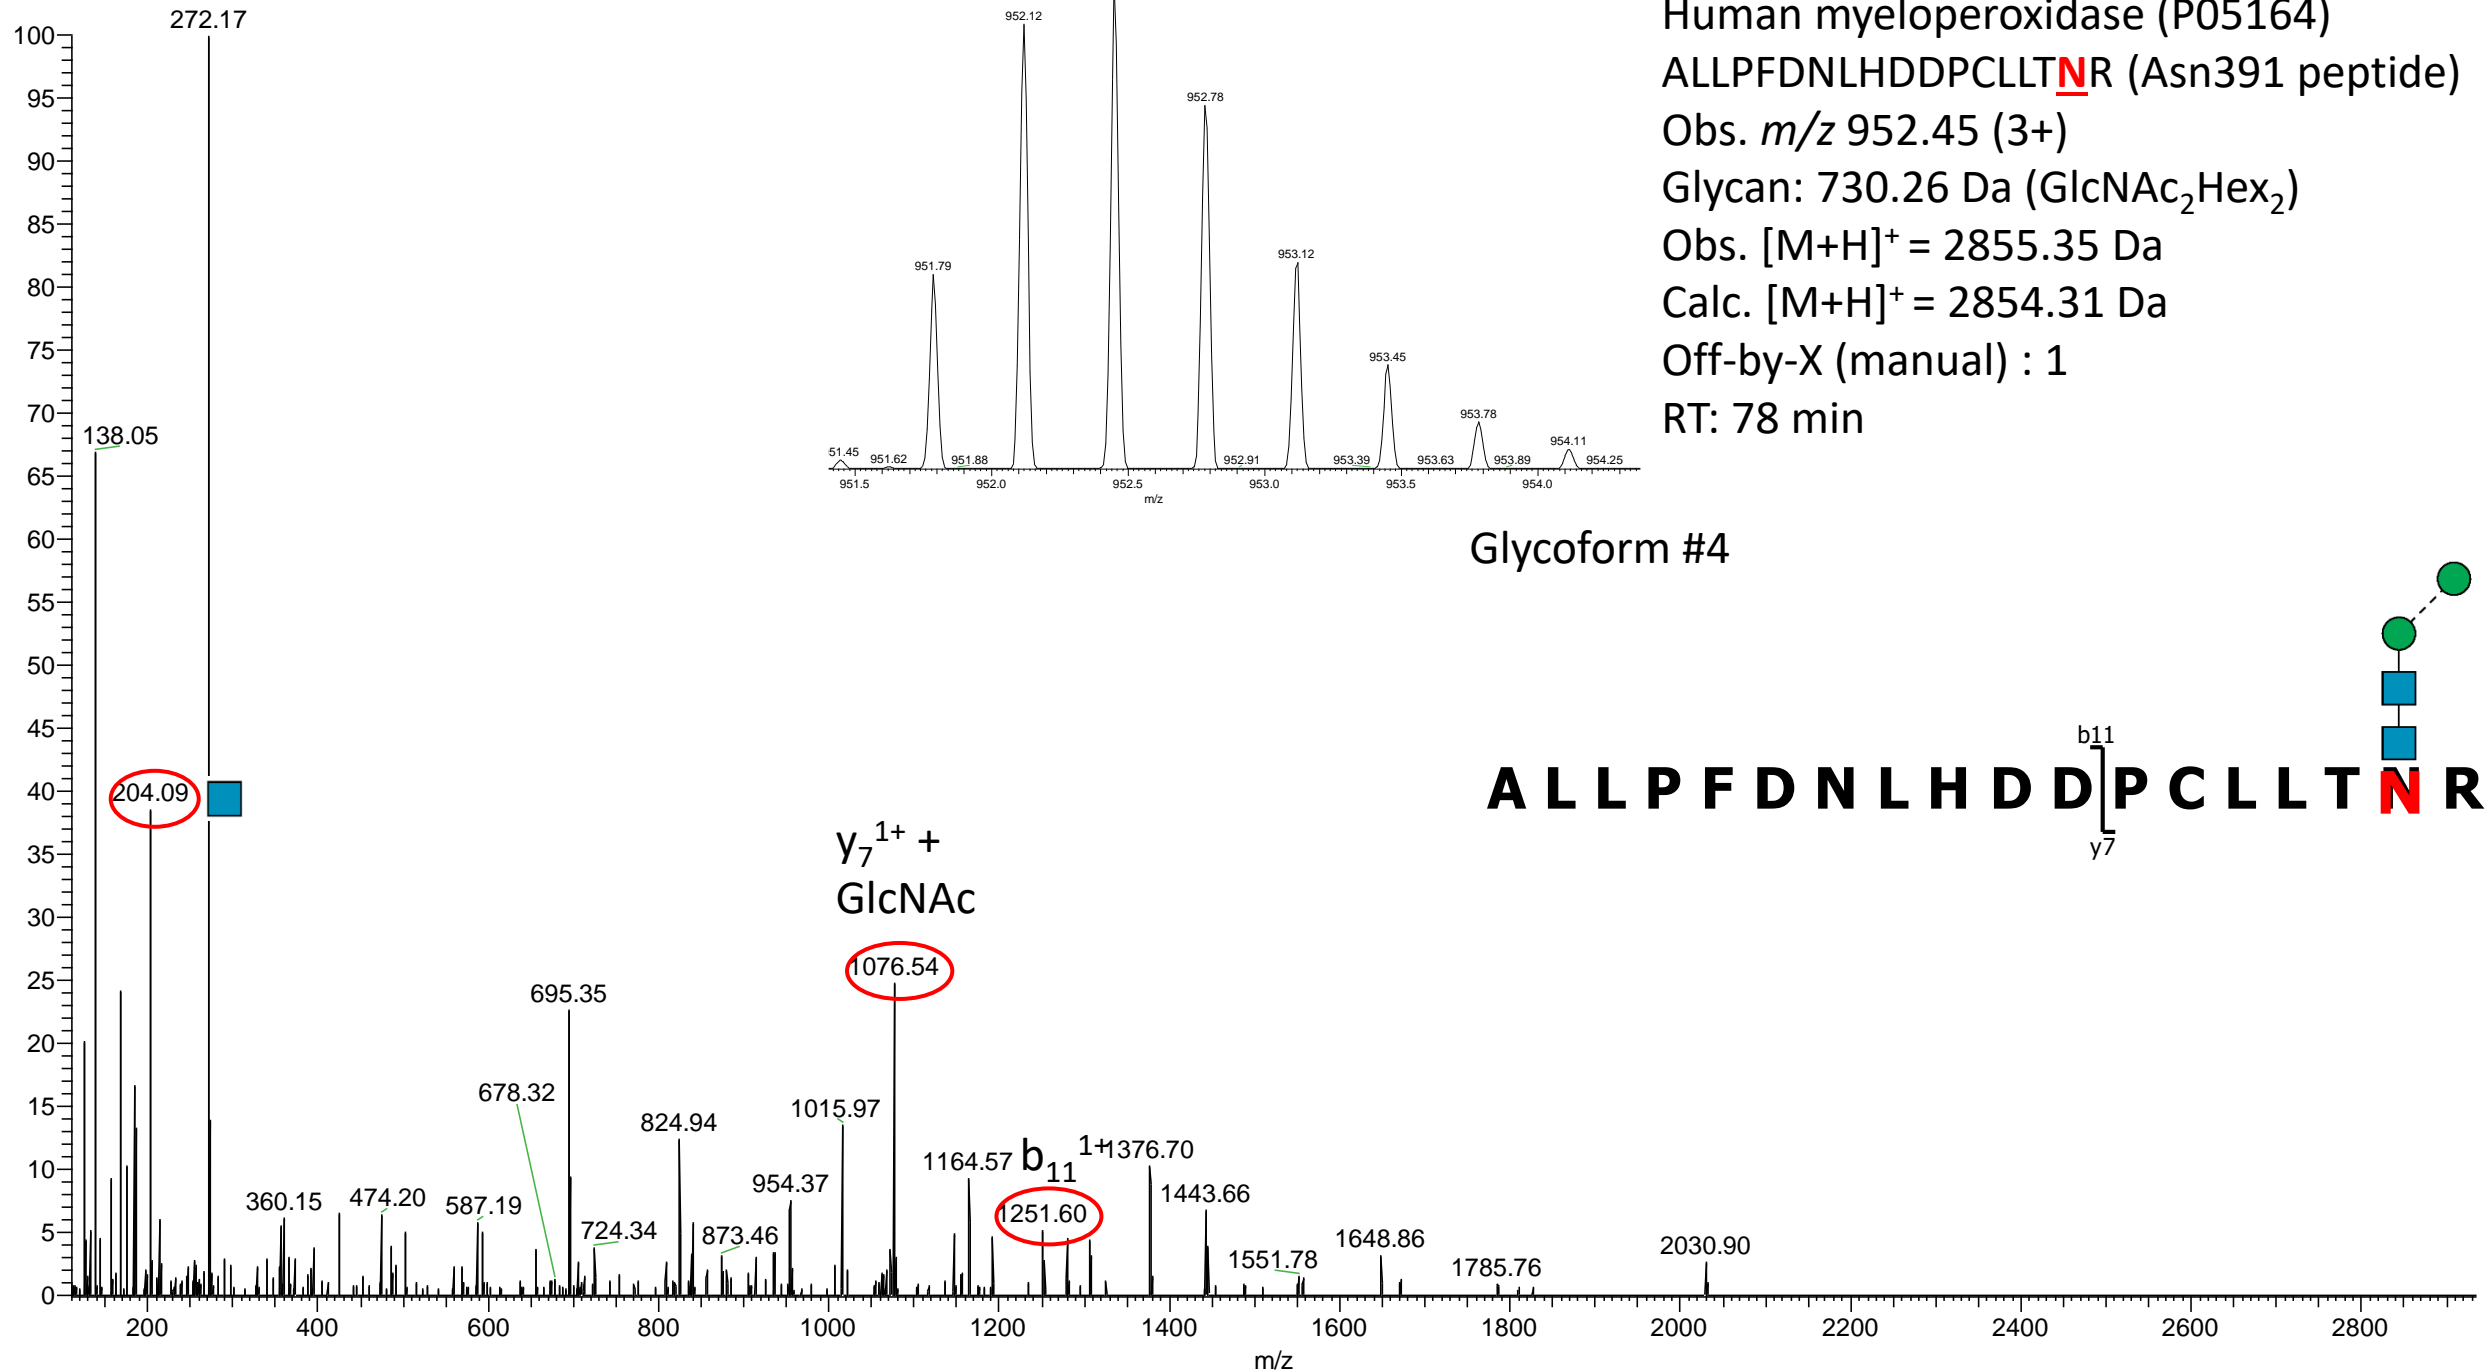

Human myeloperoxidase (P05164)  
 ALLPFDNLHDDPCLLT**N**R (Asn391 peptide)  
 Obs.  $m/z$  1000.79 (3+)  
 Glycan: 876.32 Da (GlcNAc<sub>2</sub>Hex<sub>2</sub>Fuc<sub>1</sub>)  
 Obs.  $[M+H]^+$  = 3000.37 Da  
 Calc.  $[M+H]^+$  = 3000.37 Da  
 RT: 77 min

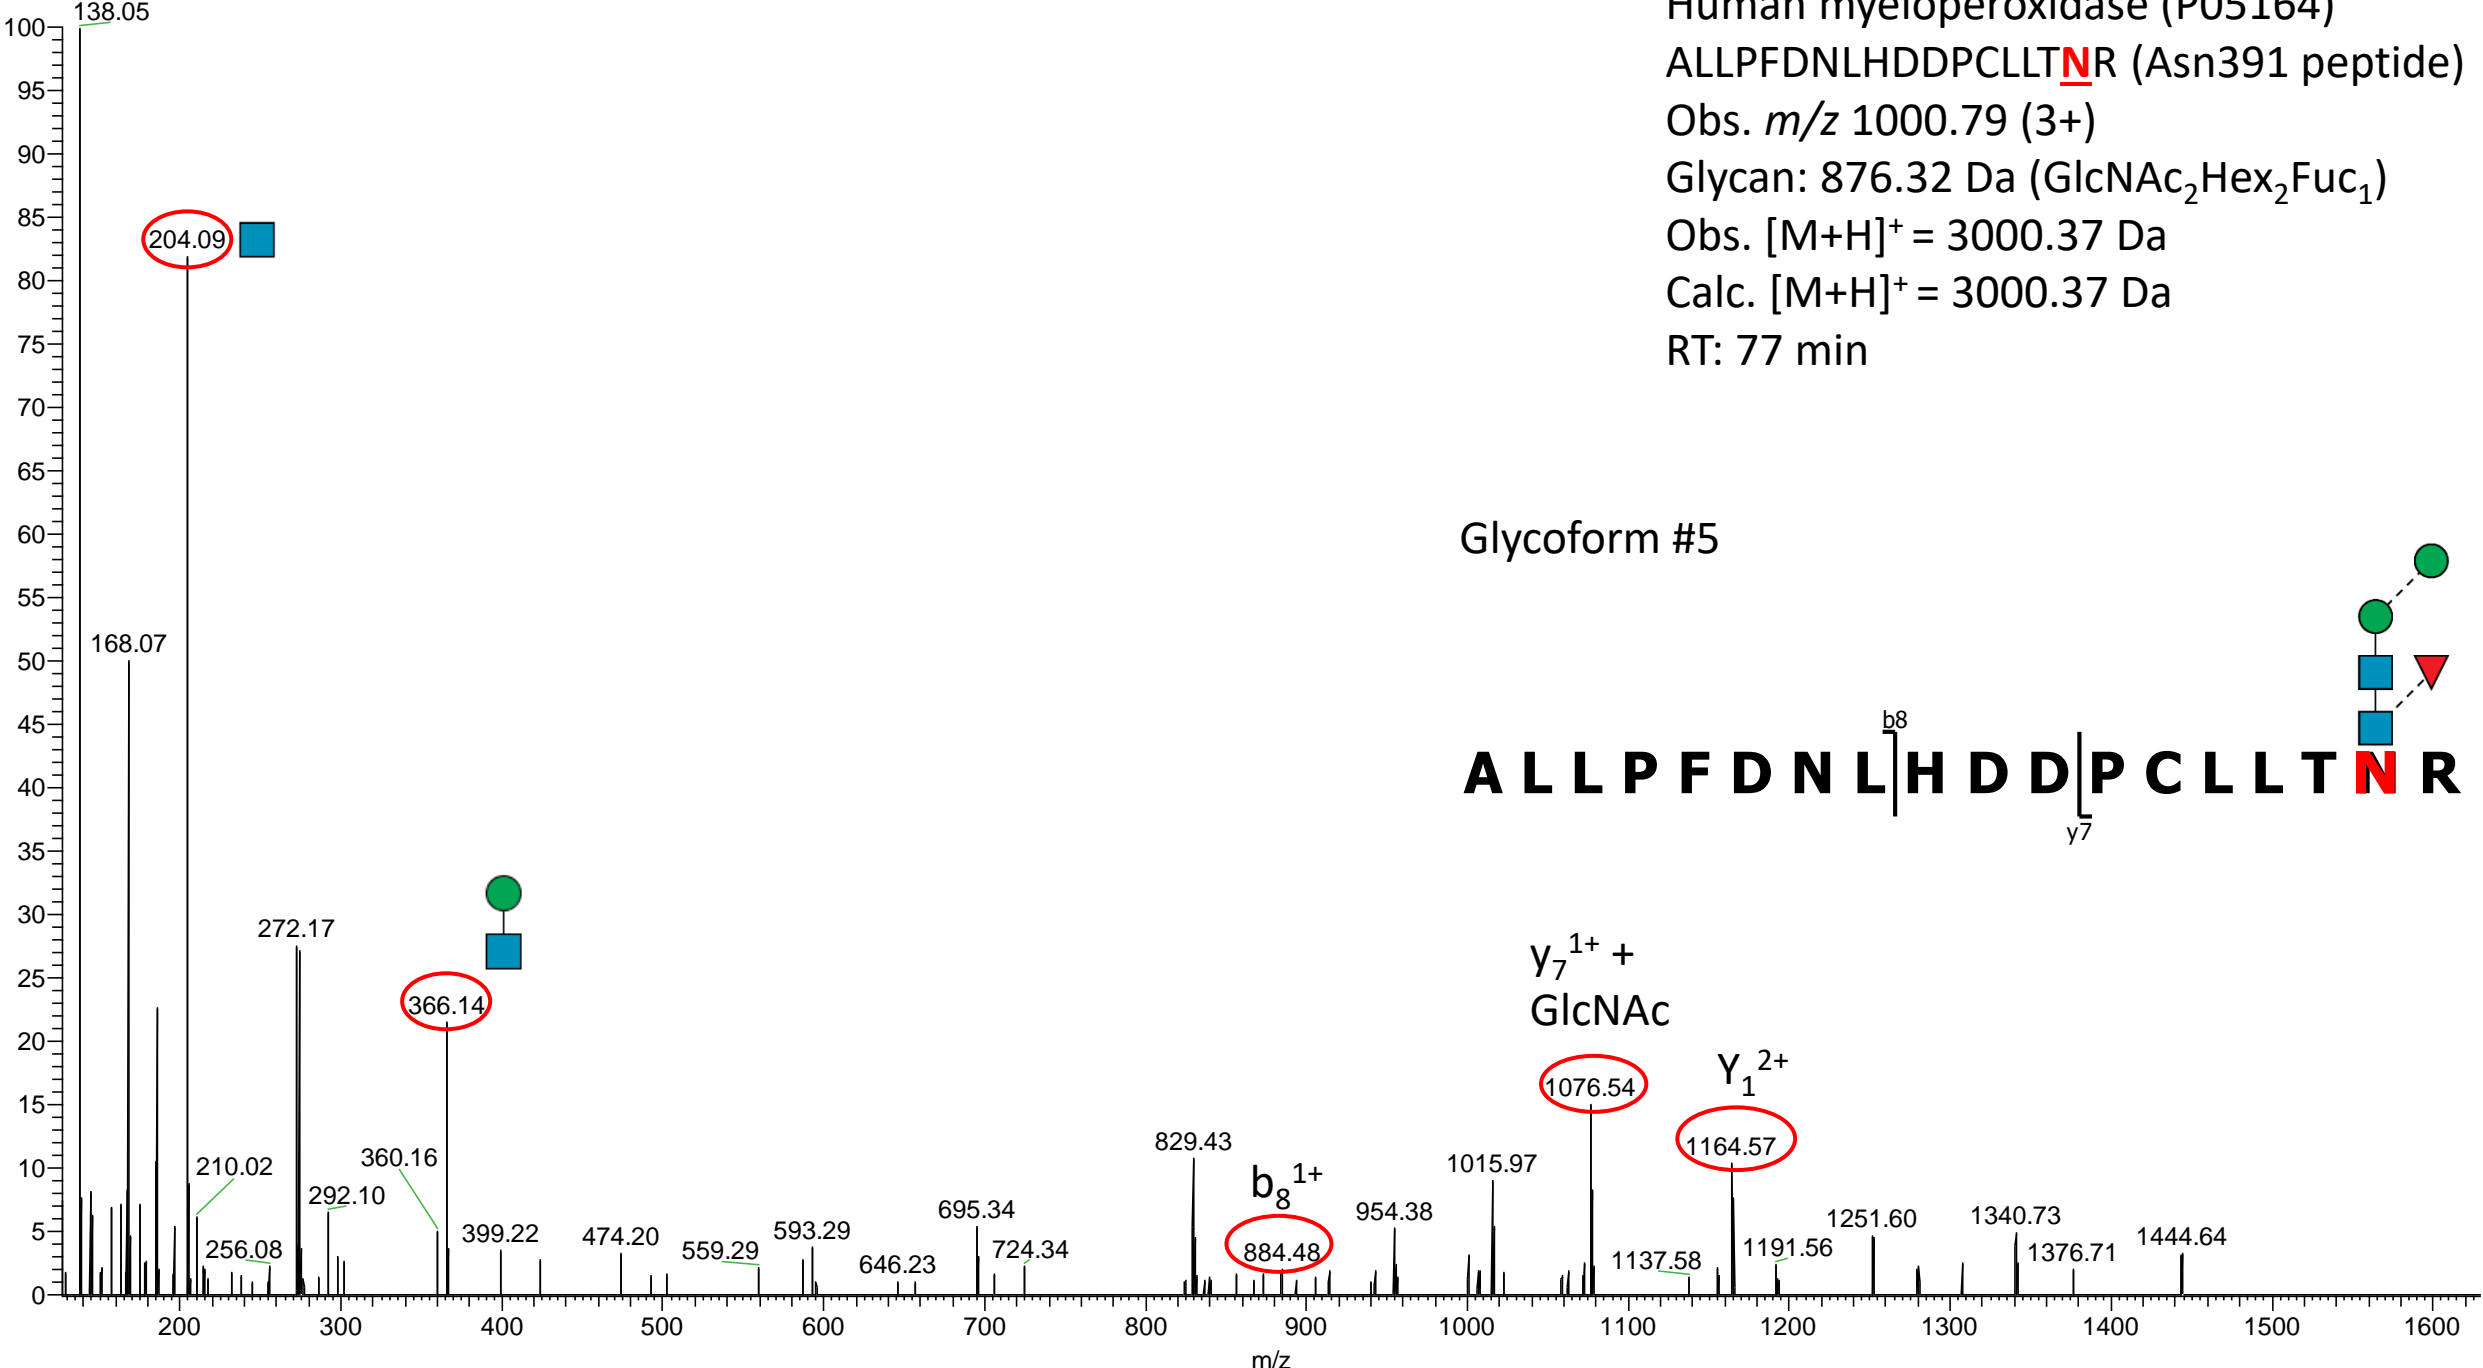

Human myeloperoxidase (P05164)  
 ALLPFDNLHDDPCLLT**N**R (Asn391 peptide)  
 Obs.  $m/z$  1006.46 (3+)  
 Glycan: 892.3172 Da (GlcNAc<sub>2</sub>Hex<sub>3</sub>)  
 Obs.  $[M+H]^+$  = 3017.38 Da  
 Calc.  $[M+H]^+$  = 3016.37 Da  
 Off-by-X (manual) : 1  
 RT: 76 min

Glycoform #6

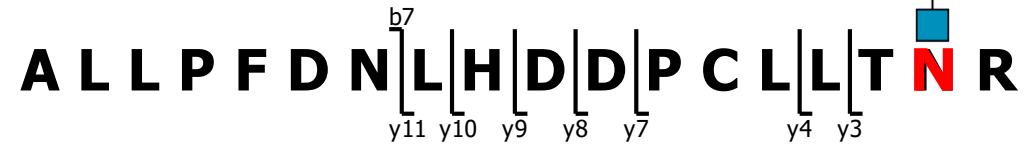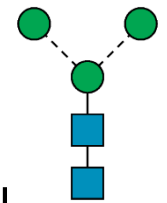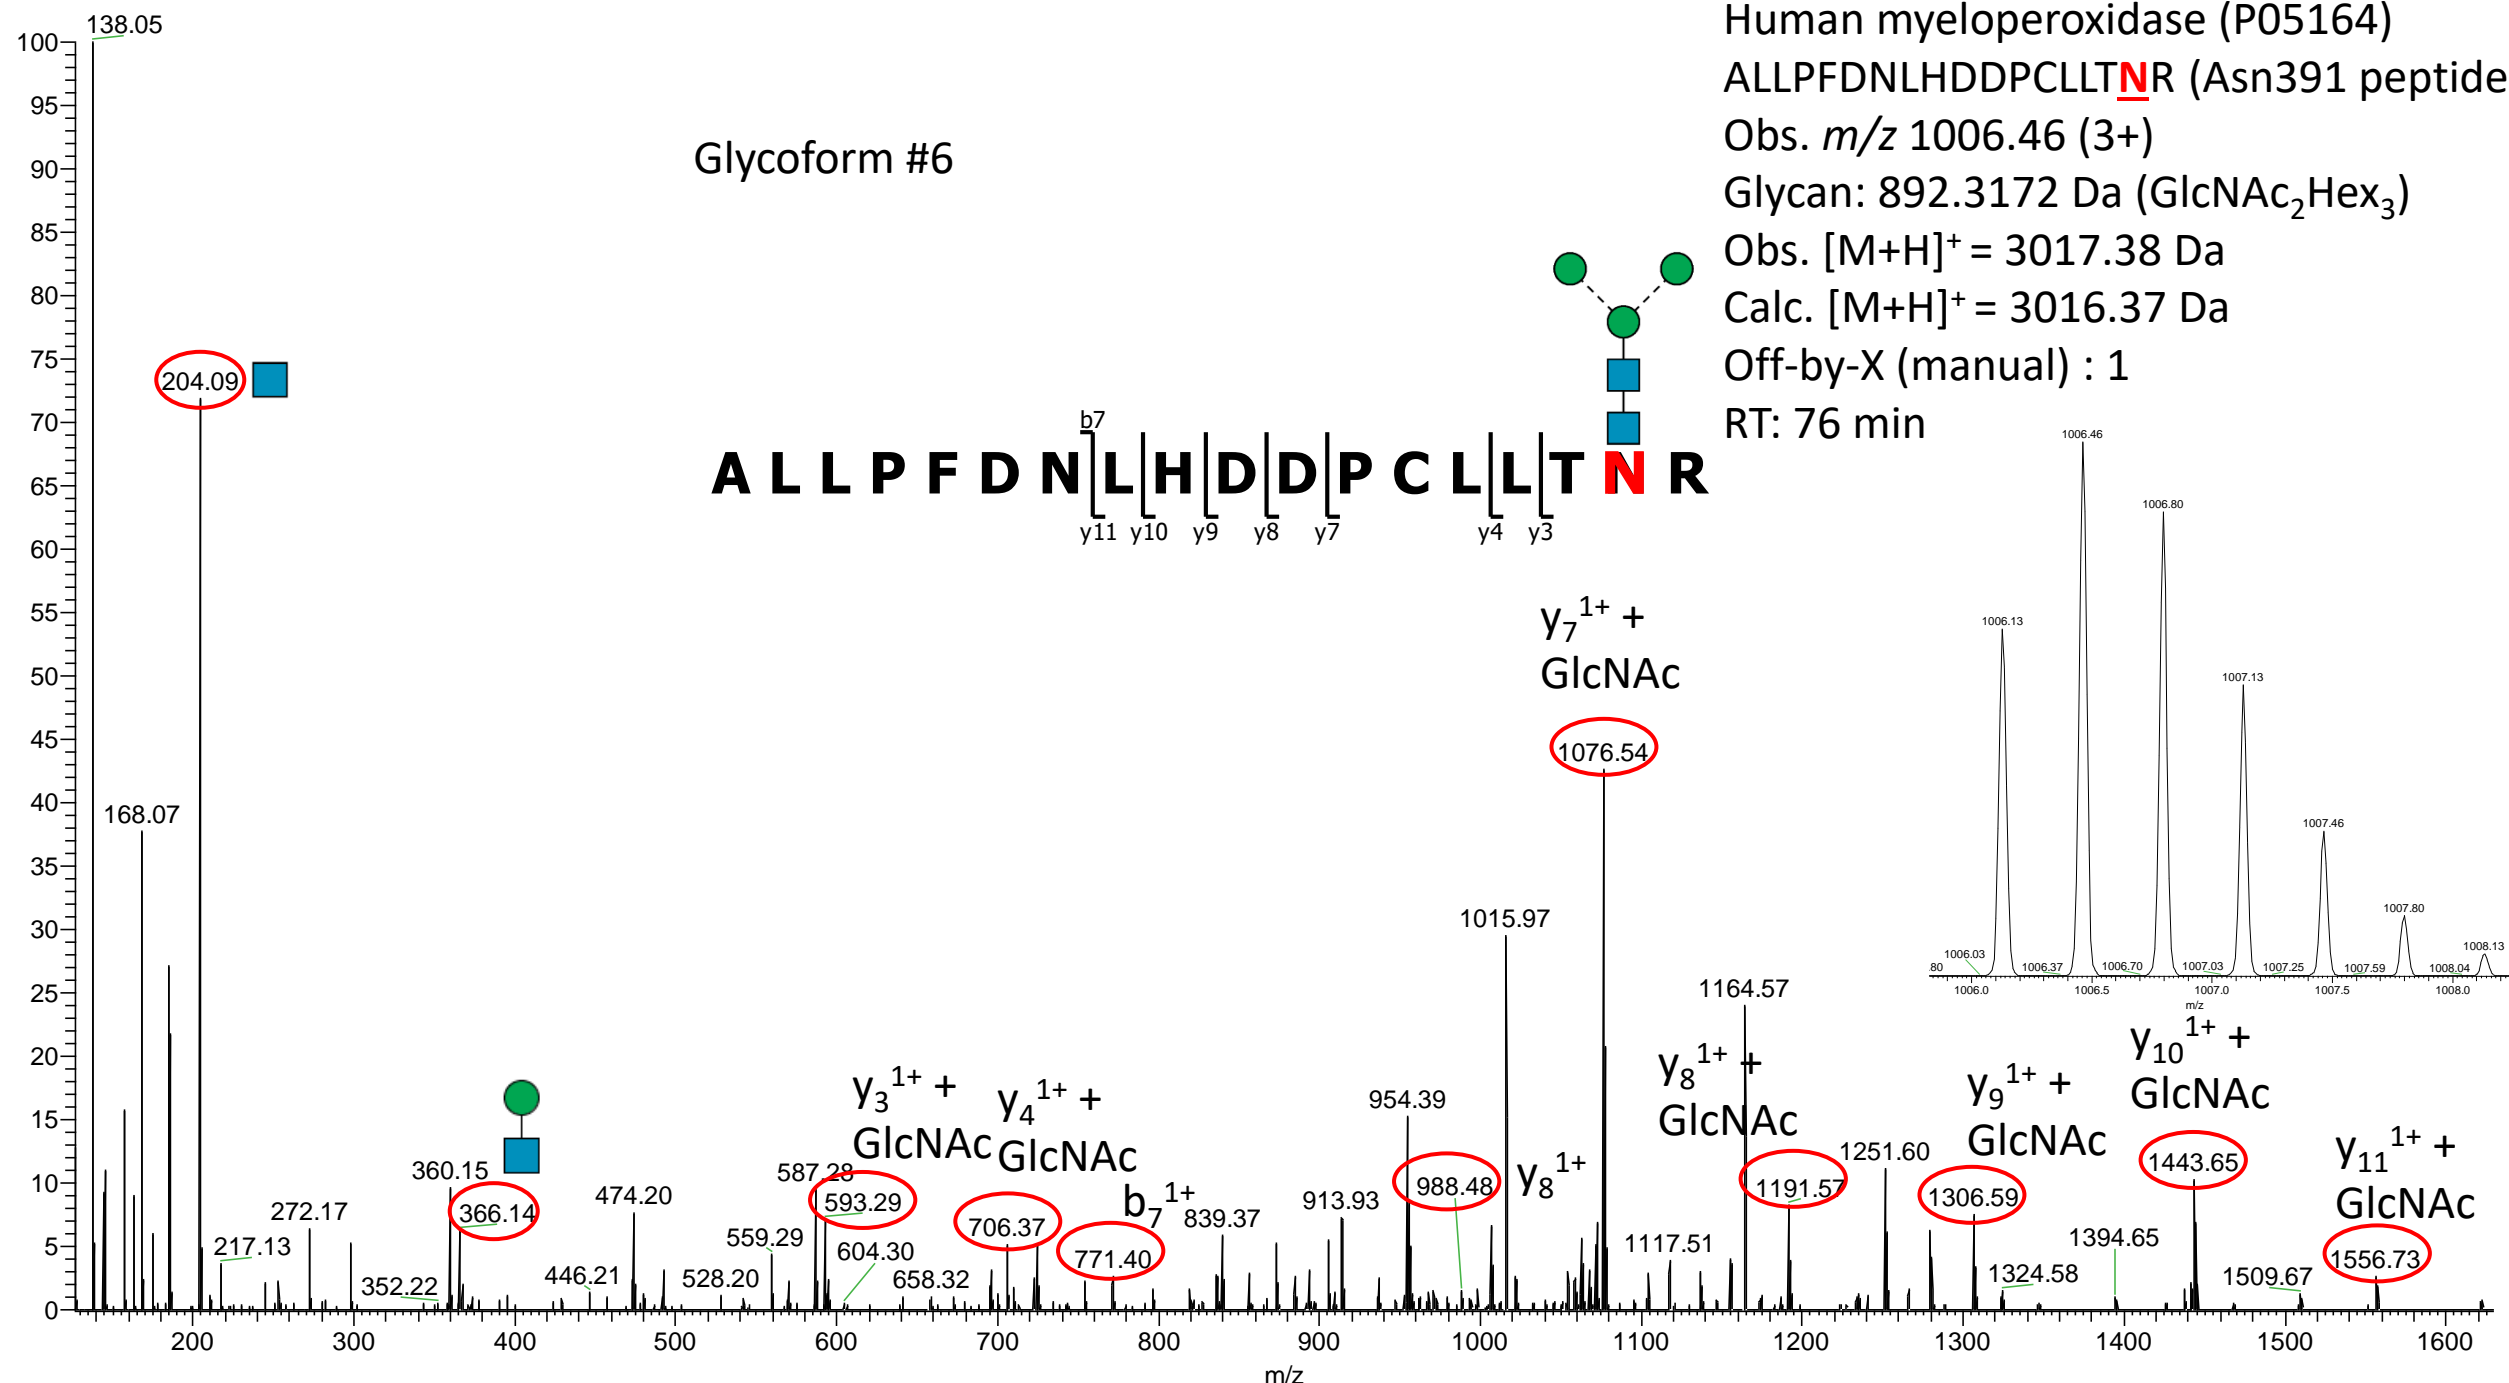

Human myeloperoxidase (P05164)  
 ALLPFDNLHDDPCLLT**N**R (Asn391 peptide)  
 Obs.  $m/z$  1054.87 (3+)  
 Glycan: 1038.38 Da (GlcNAc<sub>2</sub>Hex<sub>3</sub>Fuc<sub>1</sub>)  
 Obs.  $[M+H]^+$  = 3162.61 Da  
 Calc.  $[M+H]^+$  = 3162.43 Da  
 RT: 79 min

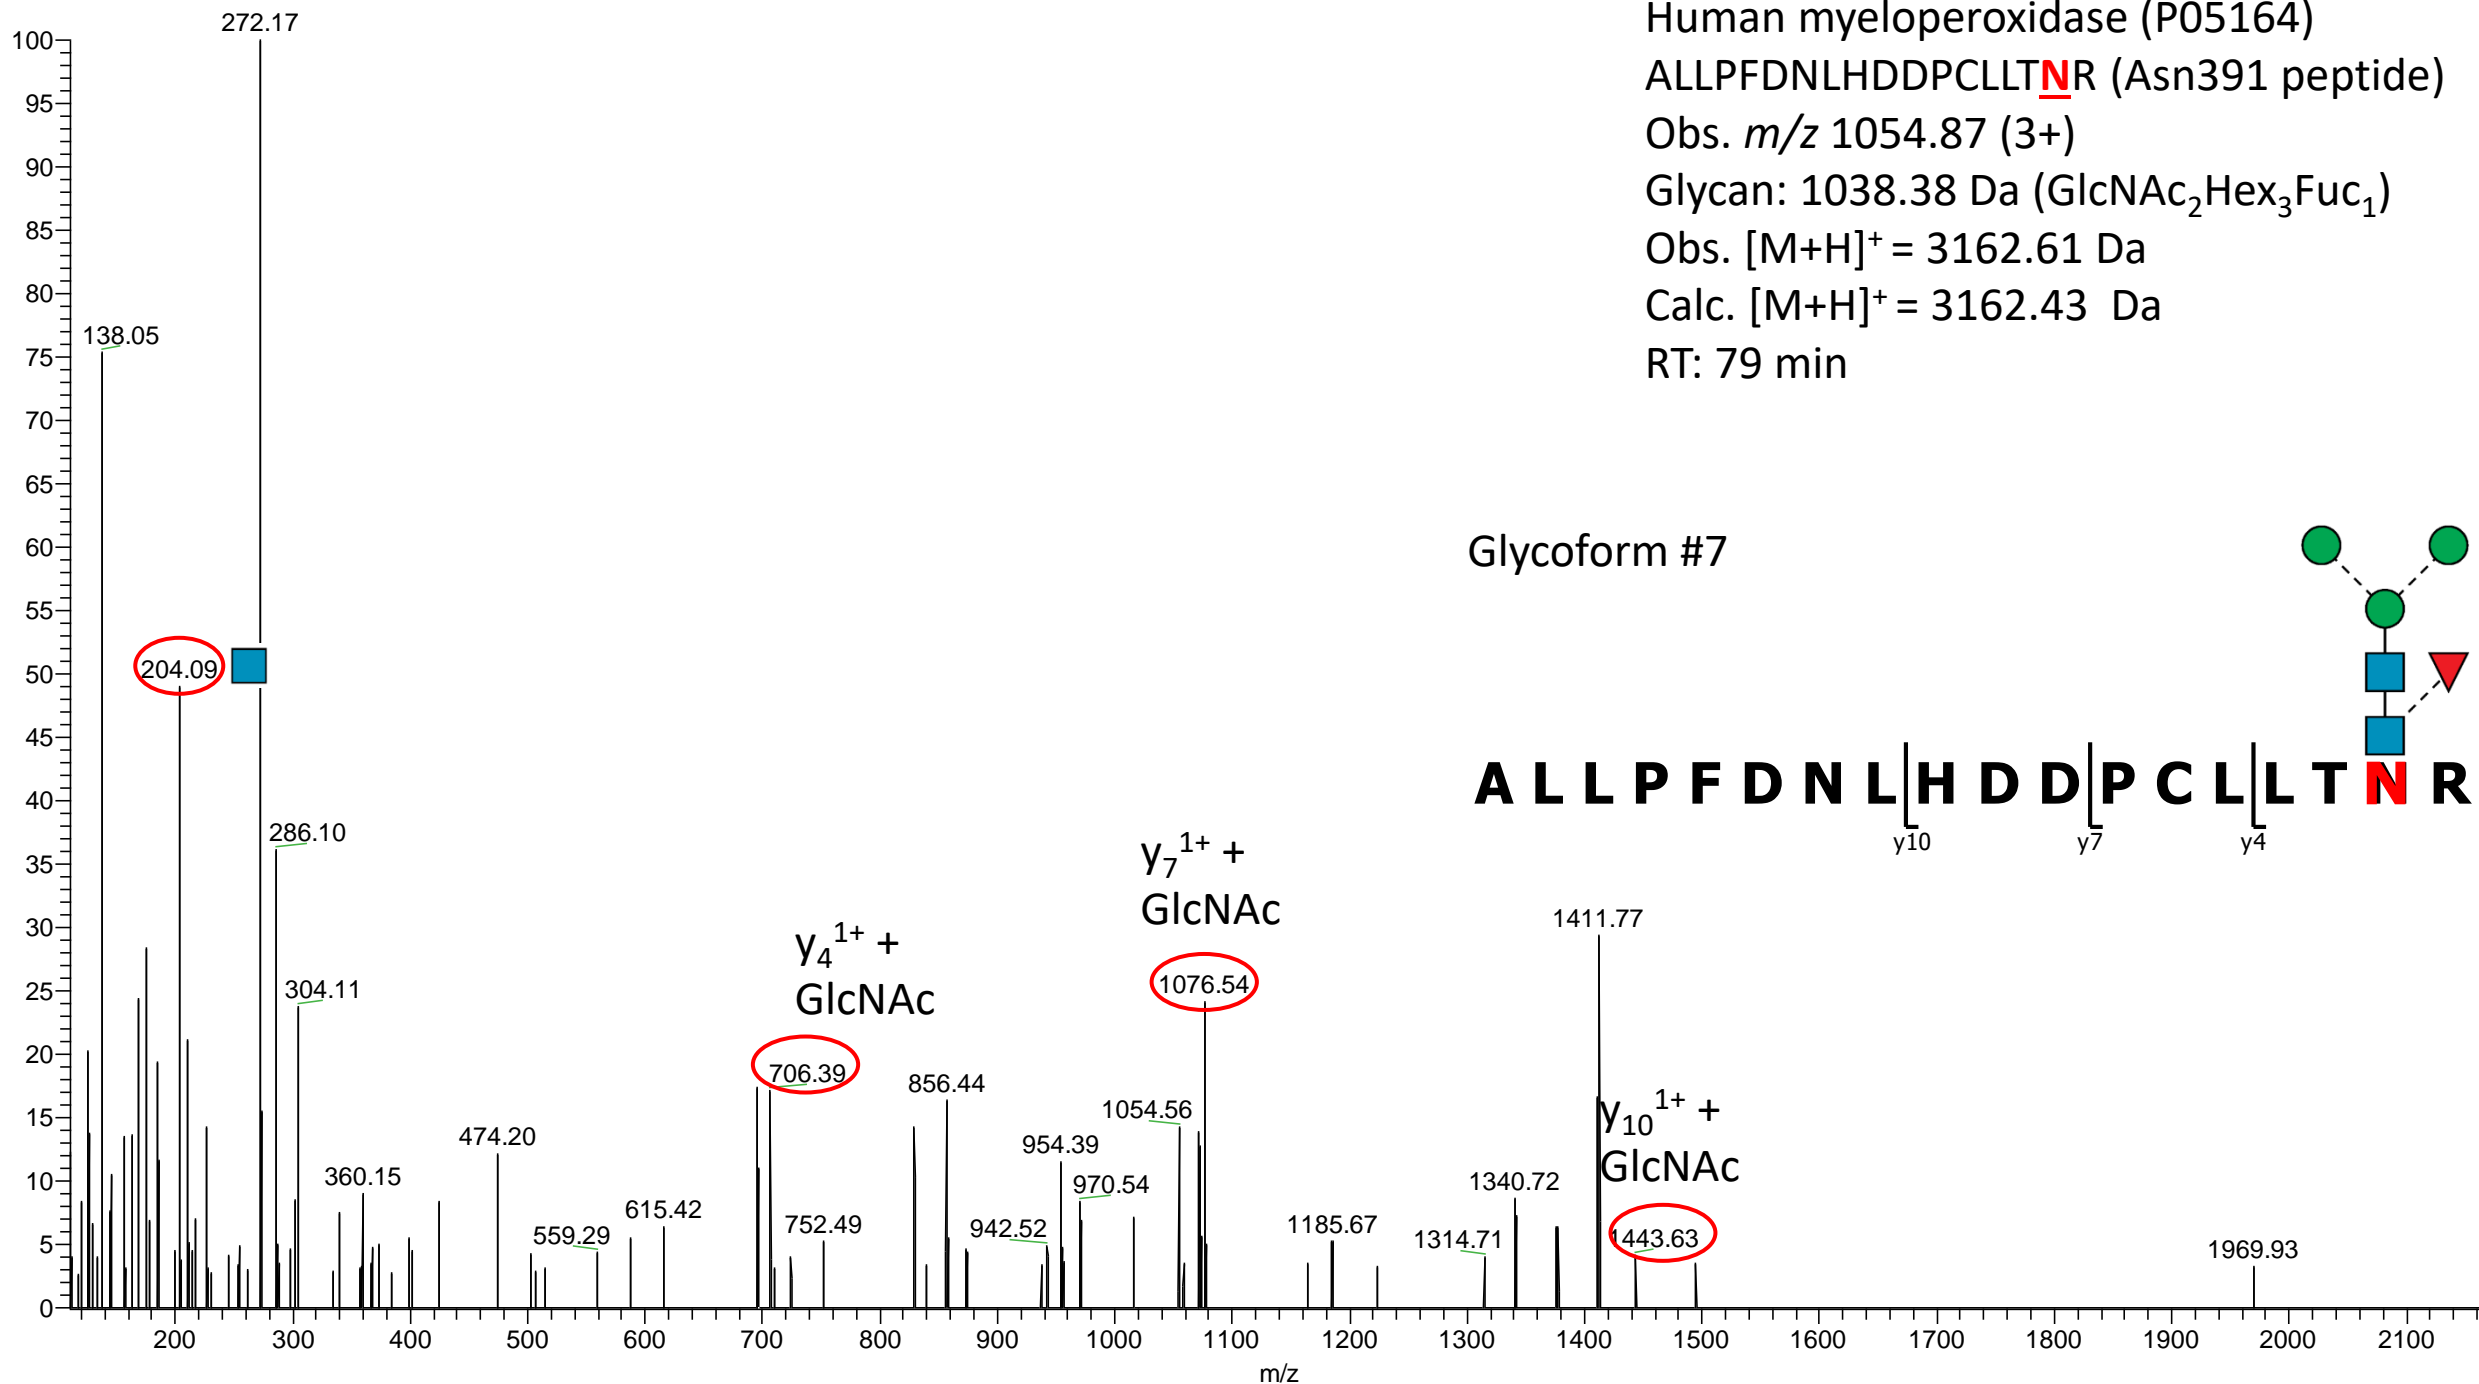

Human myeloperoxidase (P05164)  
 ALLPFDNLHDDPCLLT**N**R (Asn391 peptide)  
 Obs.  $m/z$  1589.72 (2+)  
 Glycan: 1054.37 Da (GlcNac<sub>2</sub>Hex<sub>4</sub>)  
 Obs.  $[M+H]^+$  = 3178.44 Da  
 Calc.  $[M+H]^+$  = 3178.42 Da  
 RT: 77 min

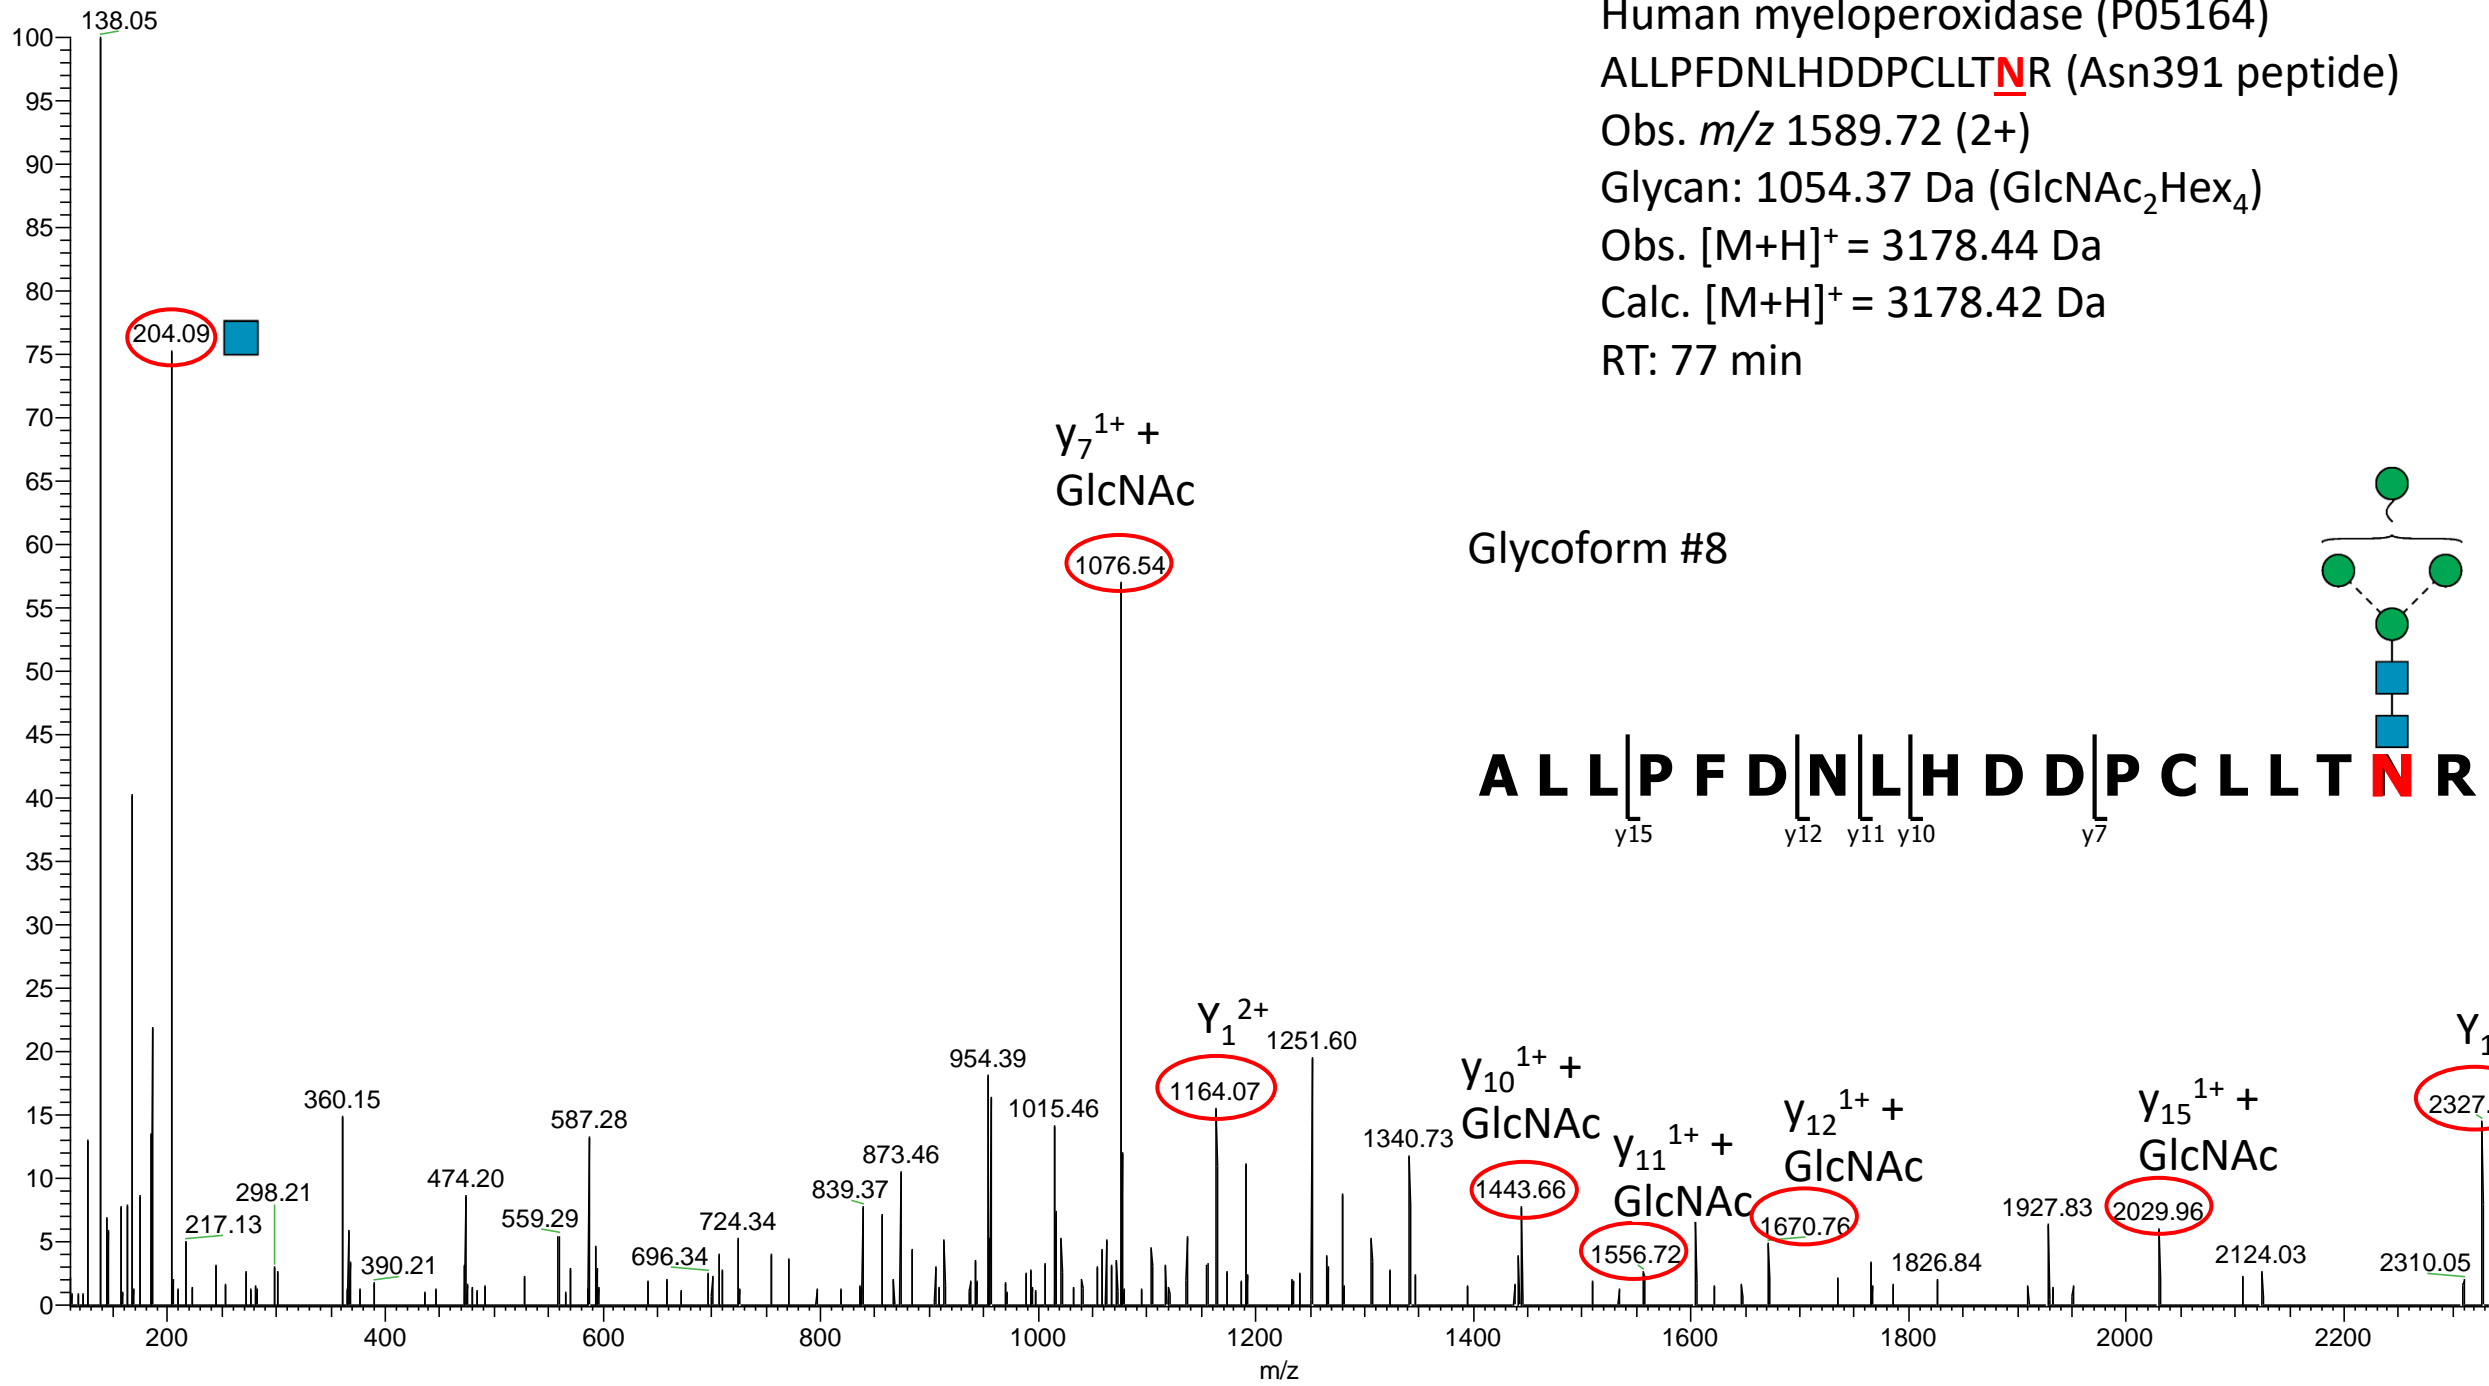

Human myeloperoxidase (P05164)  
 ALLPFDNLHDDPCLLT**N**R (Asn391 peptide)  
 Obs.  $m/z$  1108.49 (3+)  
 Glycan: 1221.46 Da (GlcNAc<sub>2</sub>Hex<sub>4</sub>Fuc<sub>1</sub>)  
 Obs.  $[M+H]^+$  = 3323.47 Da  
 Calc.  $[M+H]^+$  = 3324.48 Da  
 Off-by-X (manual) : 1  
 RT: 80 min

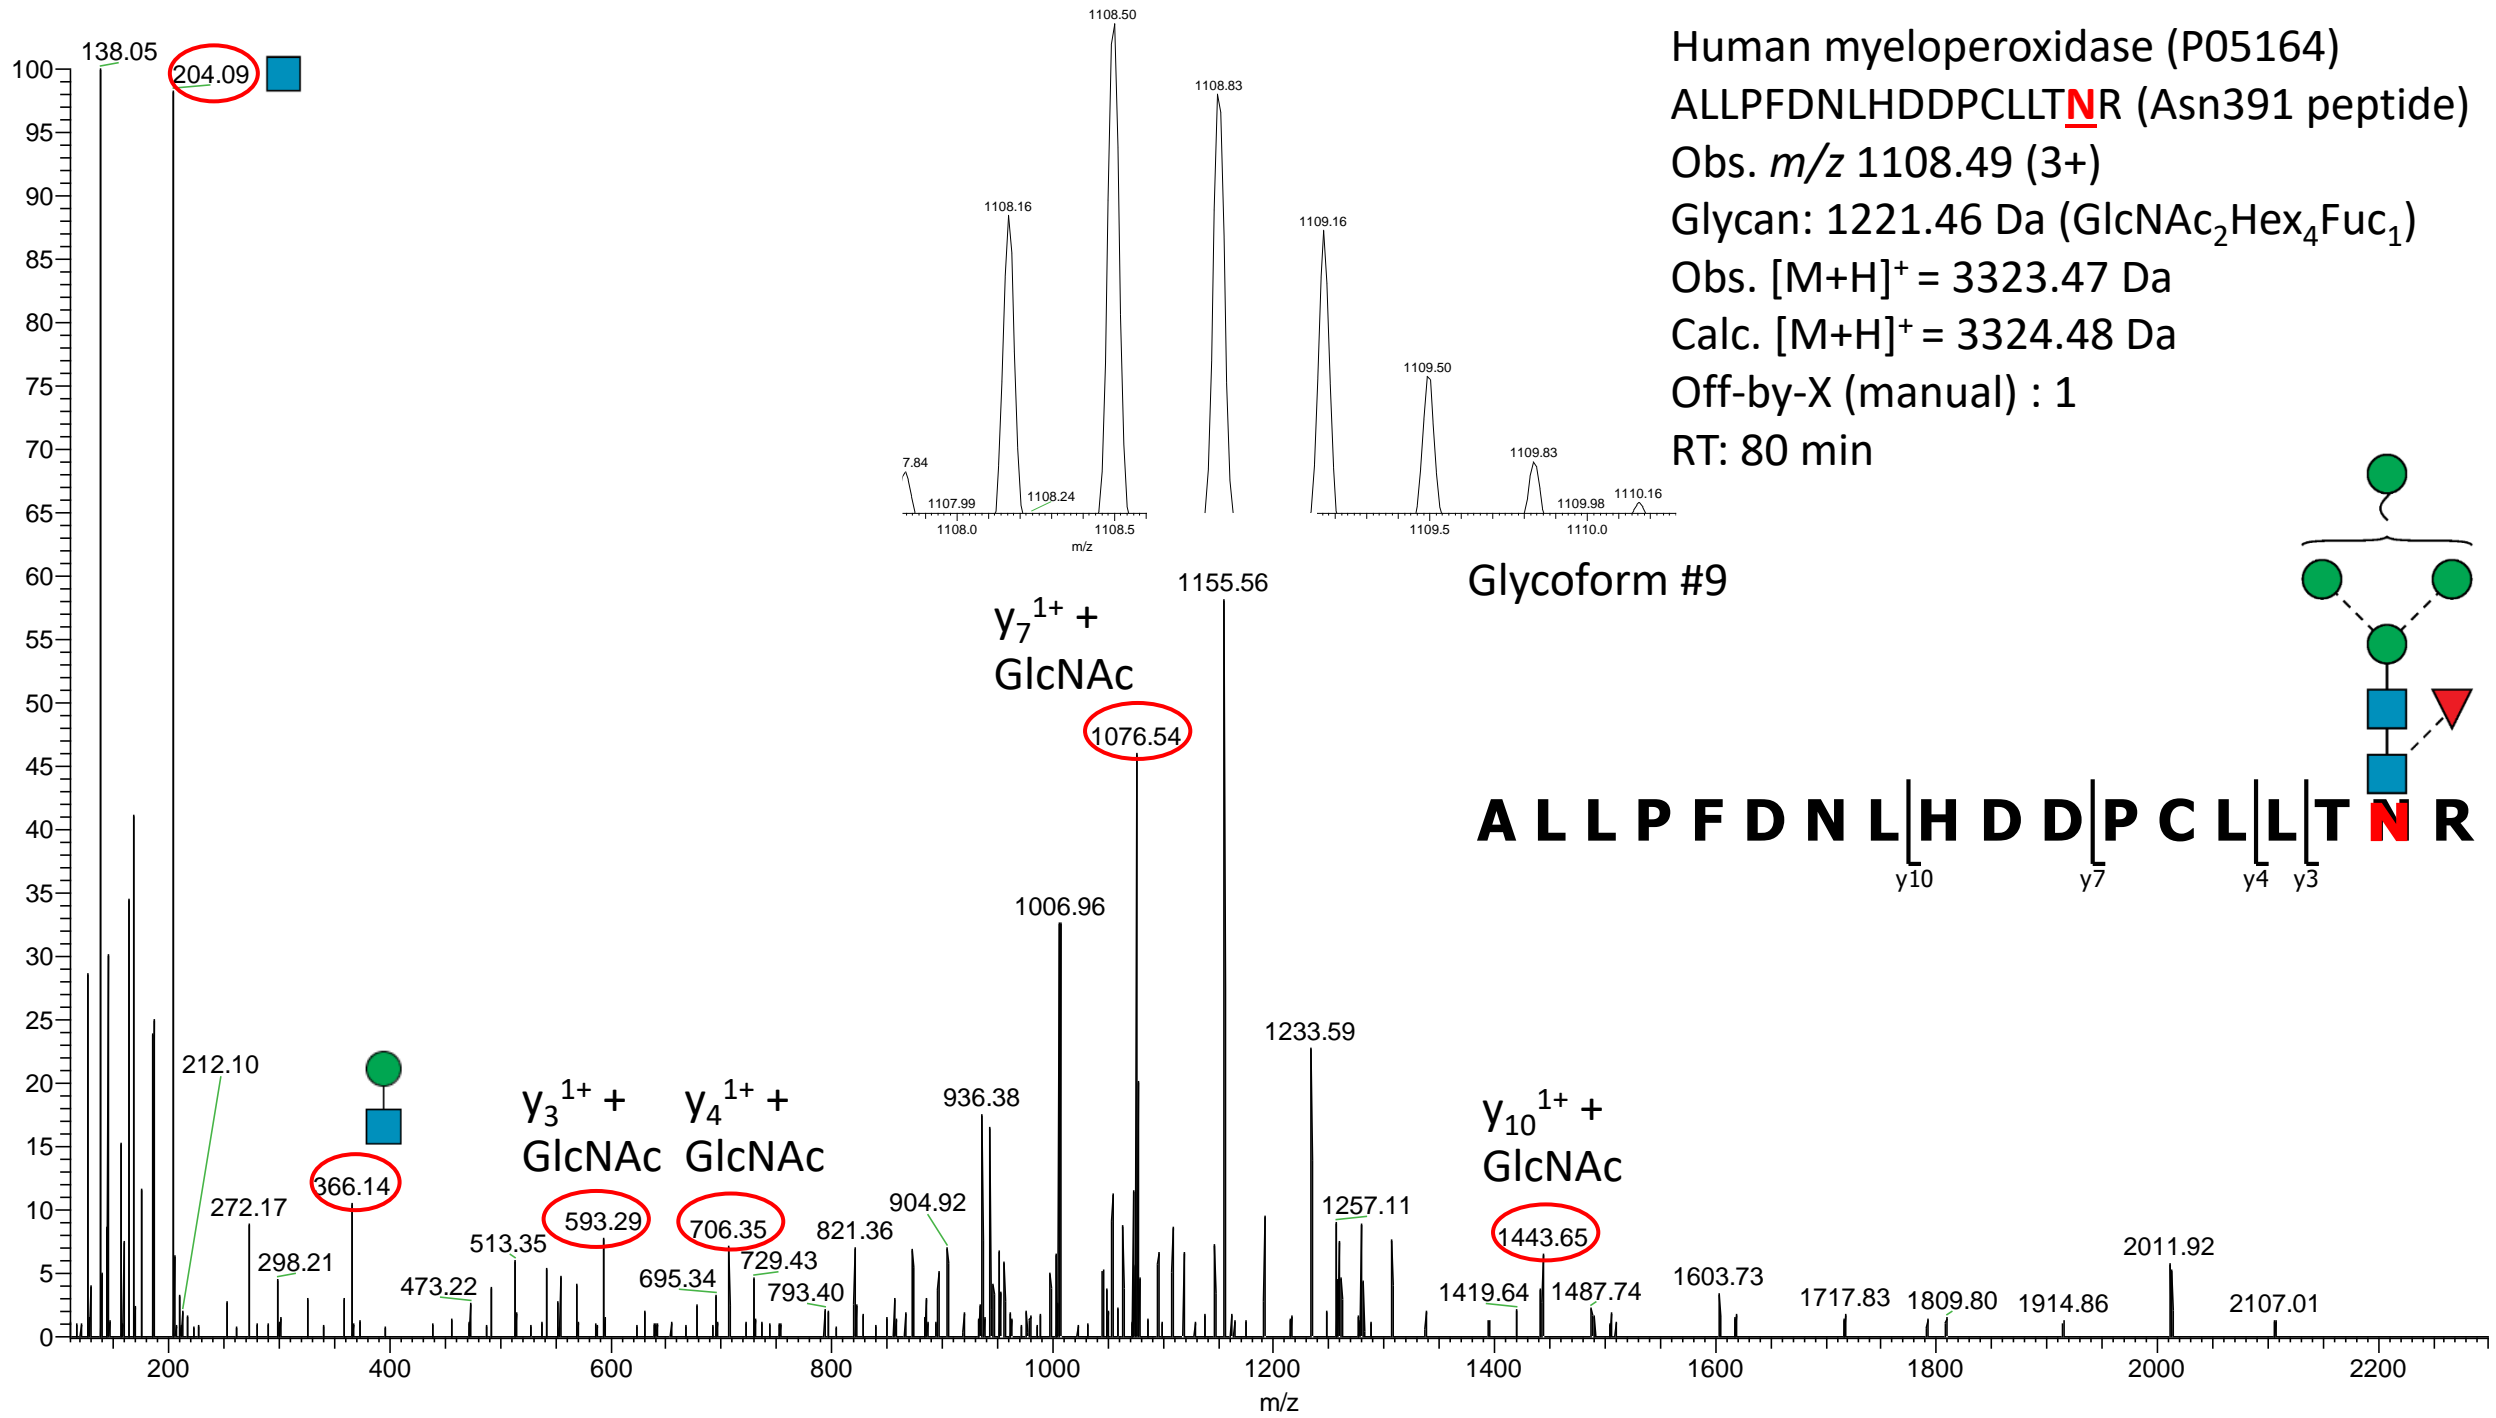

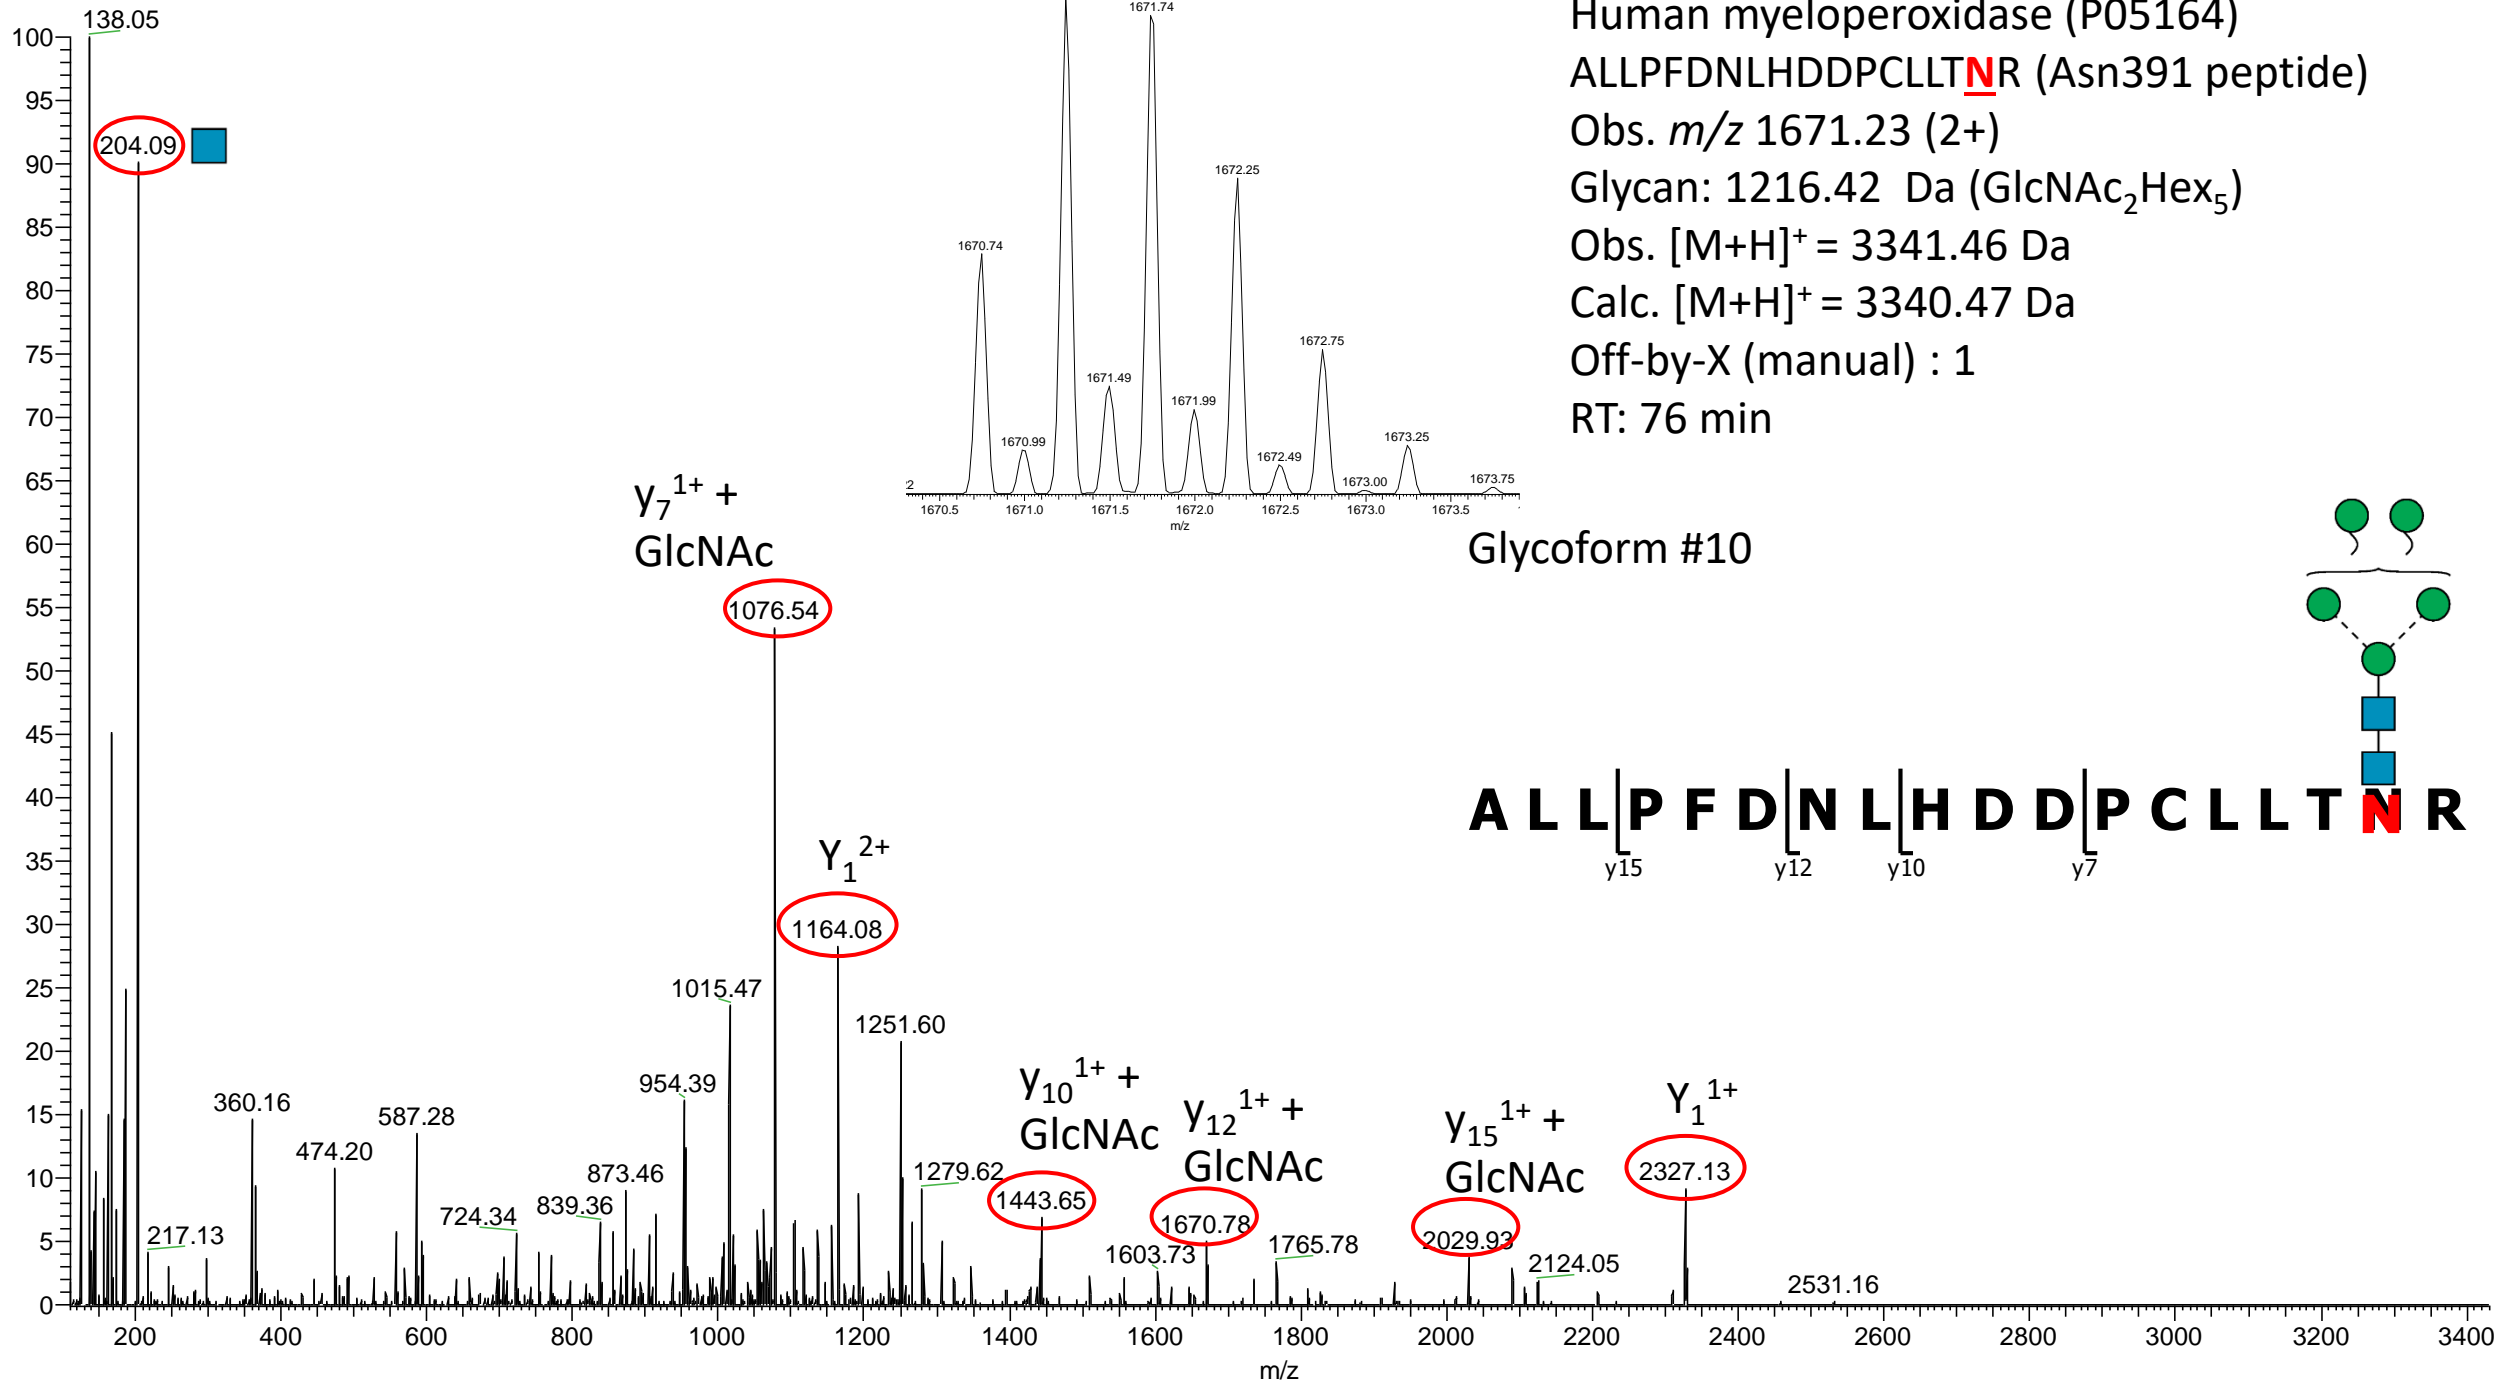



Human myeloperoxidase (P05164)  
 ALLPFDNLHDDPCLLT**N**R (Asn391 peptide)  
 Obs.  $m/z$  1162.84 (3+)  
 Glycan: 1362.48 Da (GlcNAc<sub>2</sub>Hex<sub>5</sub>Fuc<sub>1</sub>)  
 Obs.  $[M+H]^+$  = 3486.52 Da  
 Calc.  $[M+H]^+$  = 3486.53 Da  
 RT: 80 min

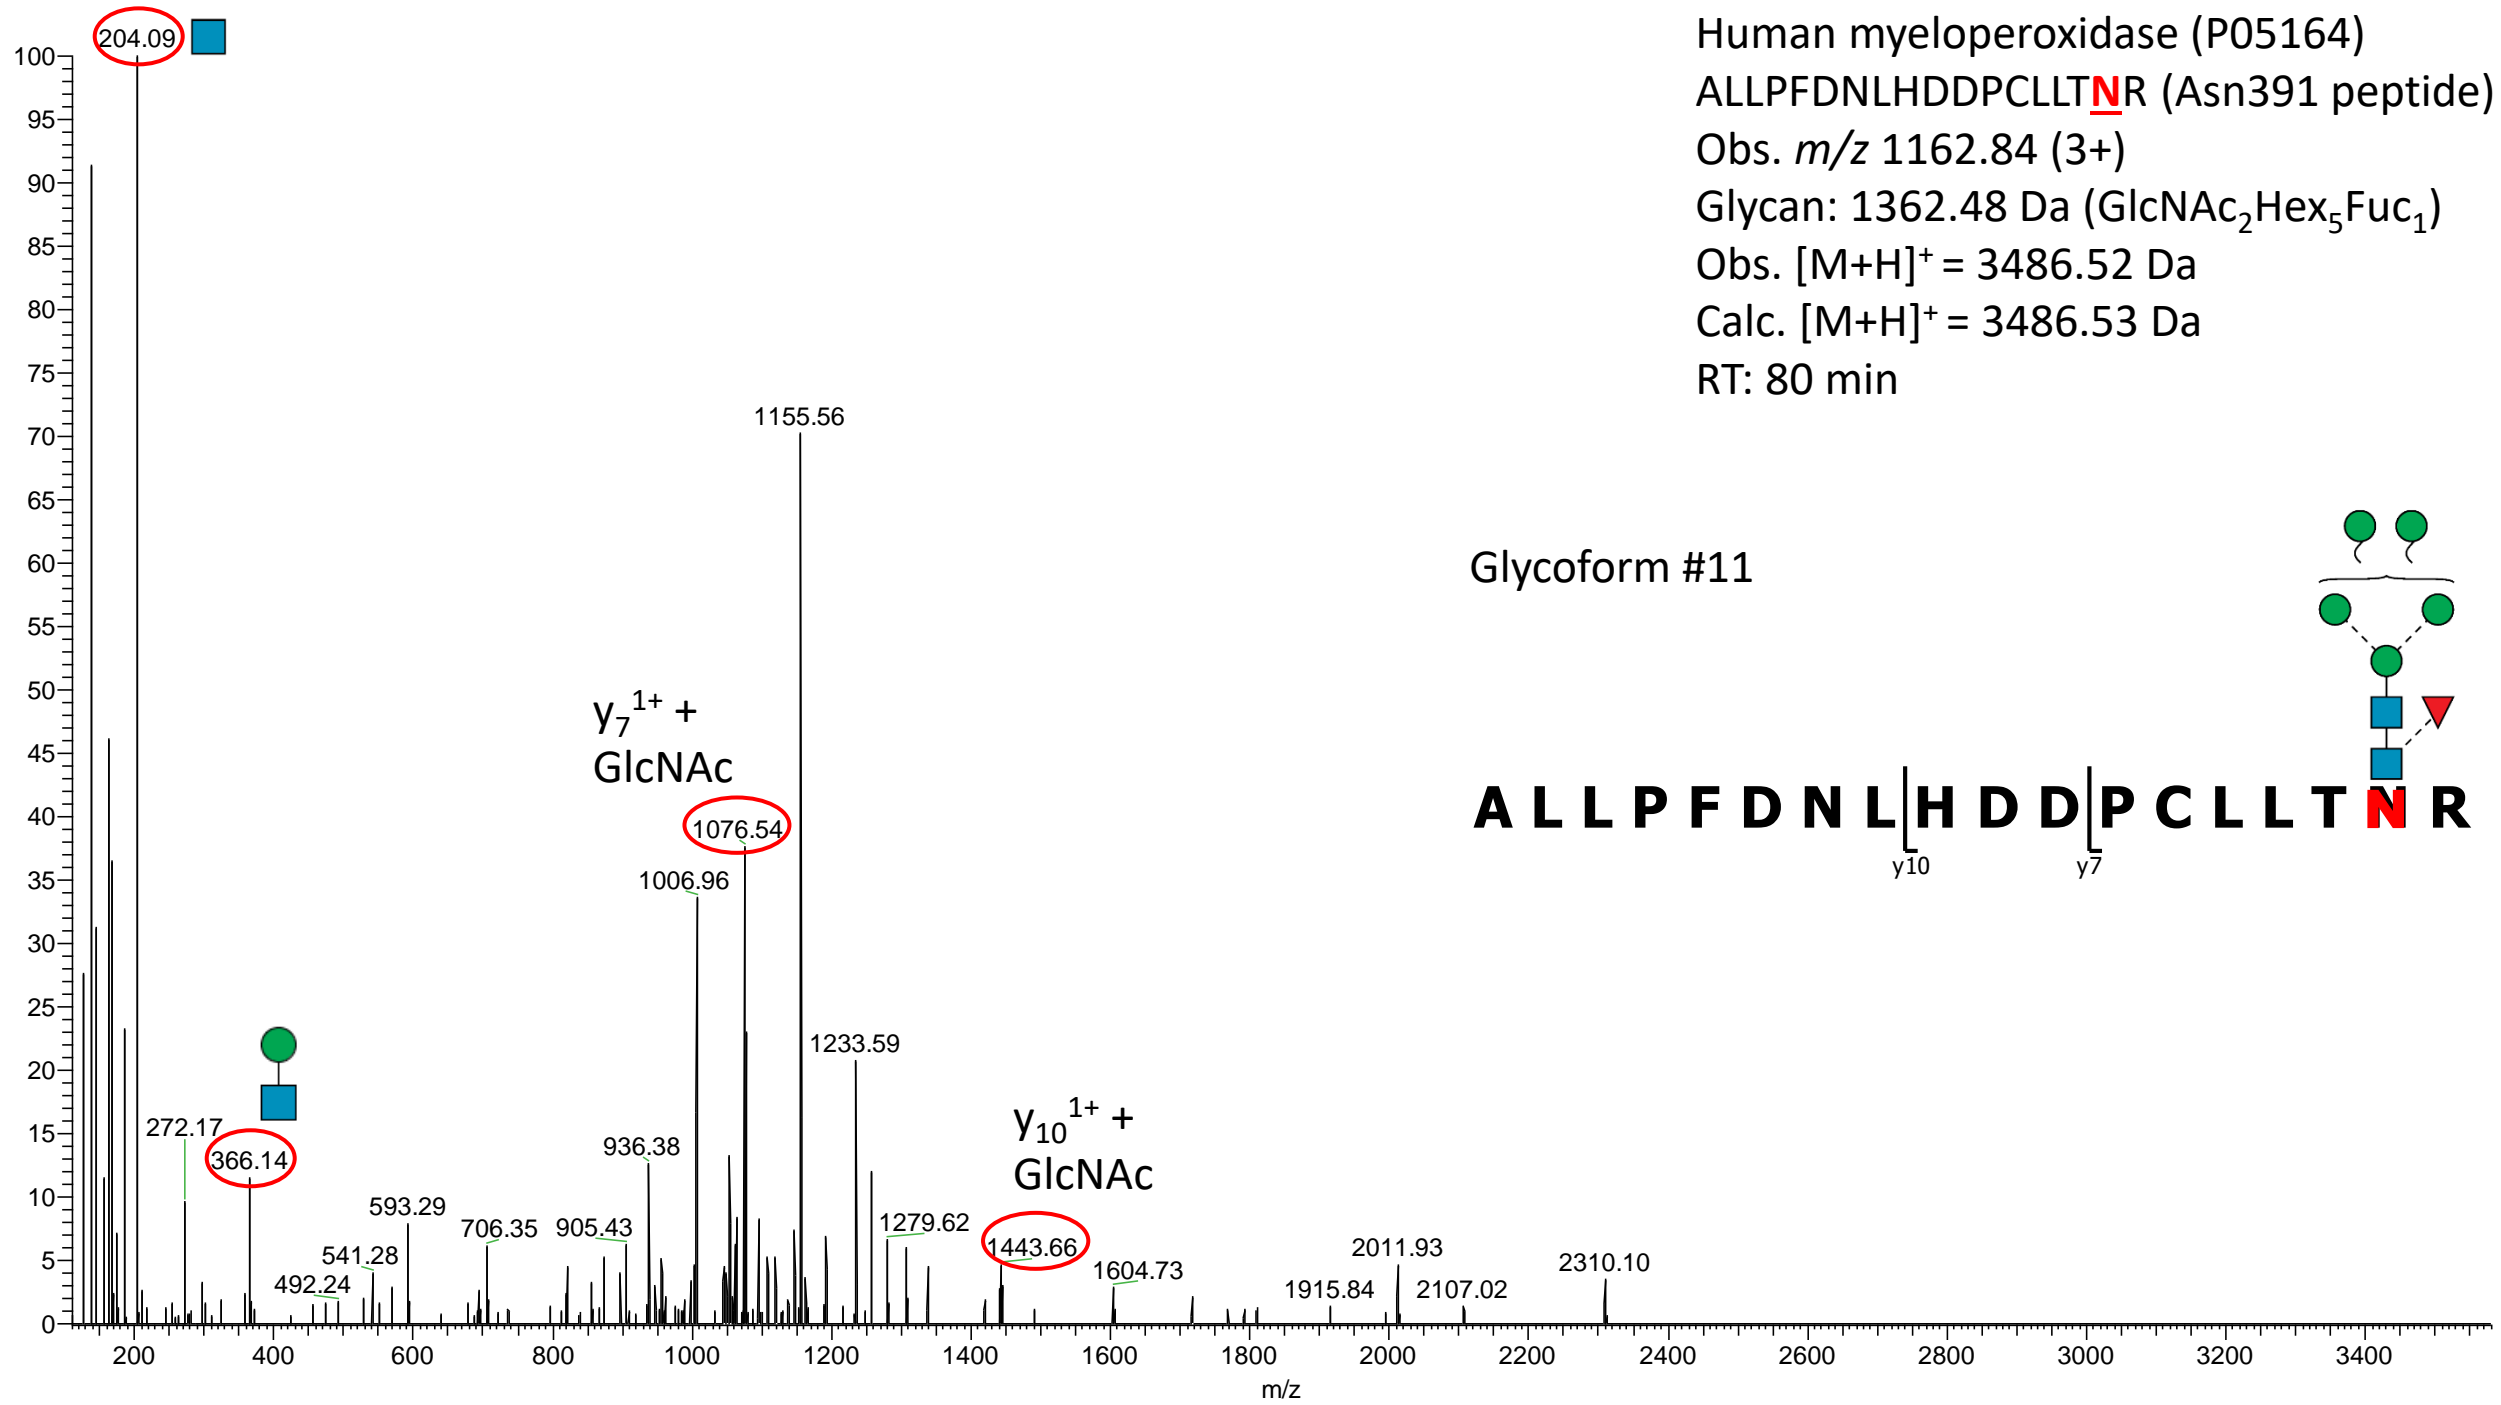

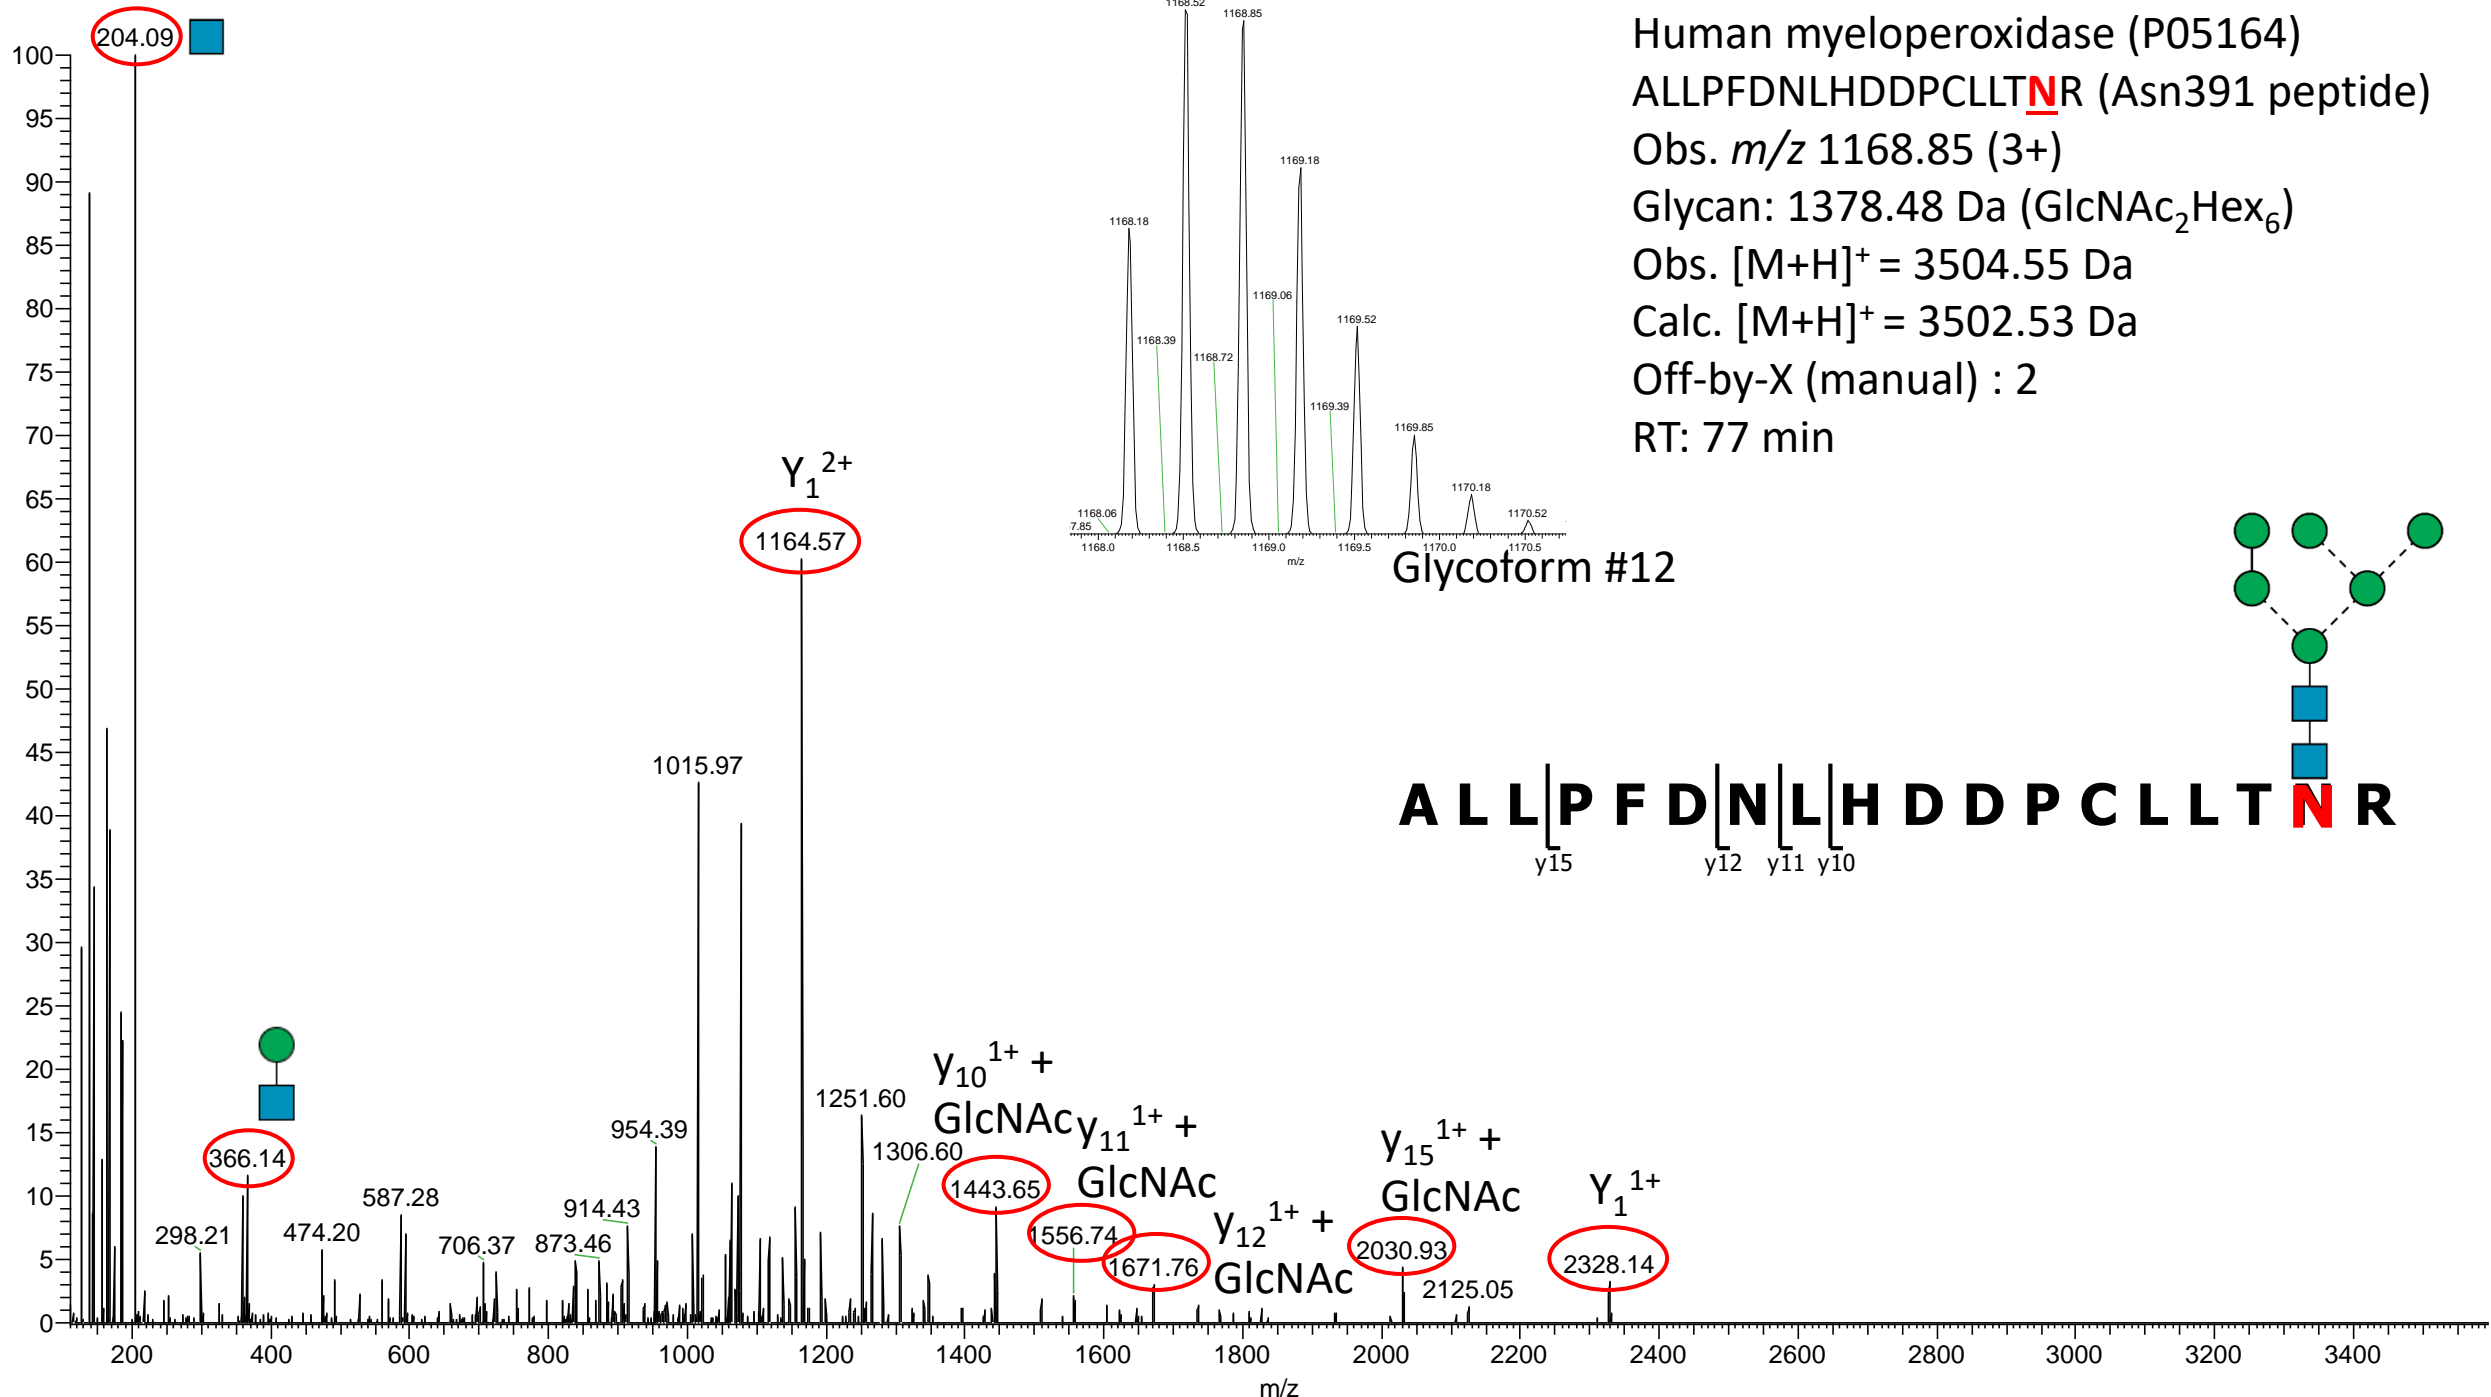

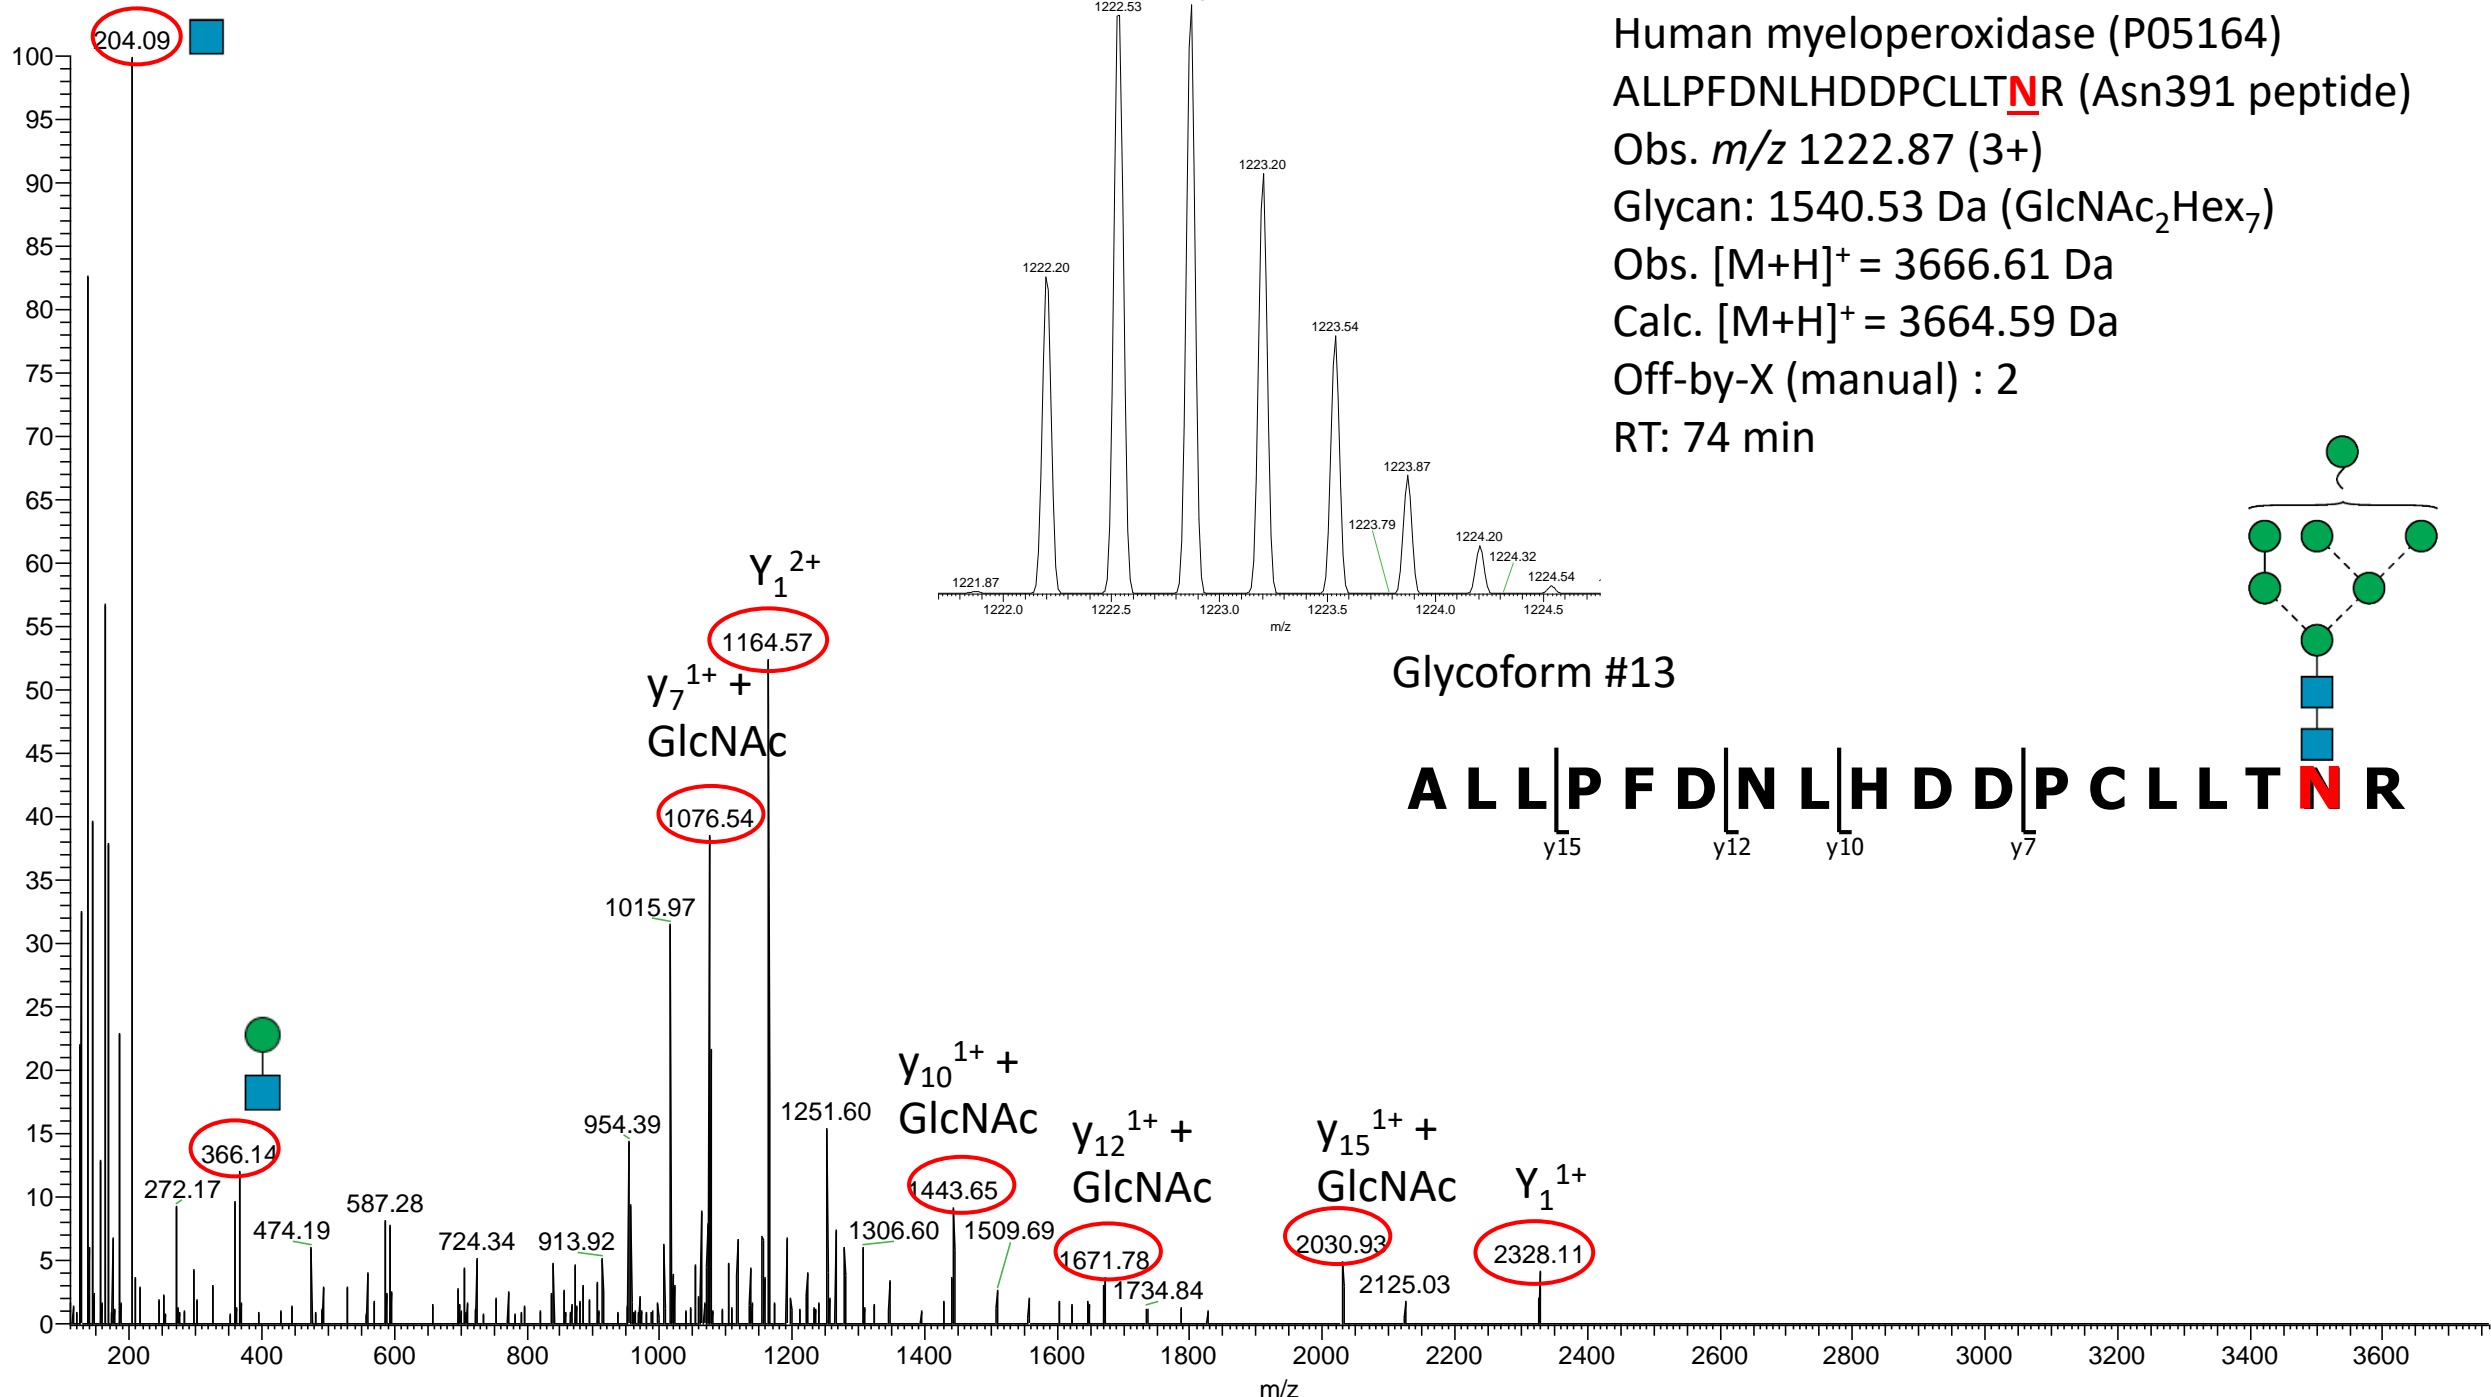

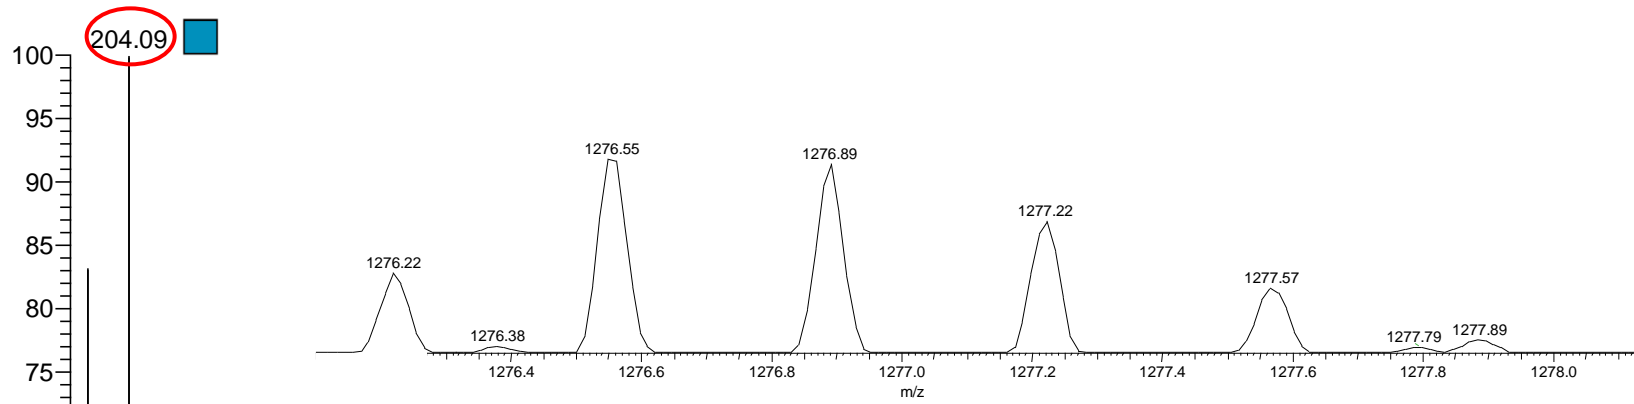

Human myeloperoxidase (P05164)  
 ALLPFDNLHDDPCLLTNR (Asn391 peptide)  
 Obs.  $m/z$  1276.89 (3+)  
 Glycan: 1702.58 Da (GlcNAc<sub>2</sub>Hex<sub>8</sub>)  
 Obs.  $[M+H]^+$  = 3828.67 Da  
 Calc.  $[M+H]^+$  = 3826.63 Da  
 Off-by-X (manual) : 2  
 RT: 74 min

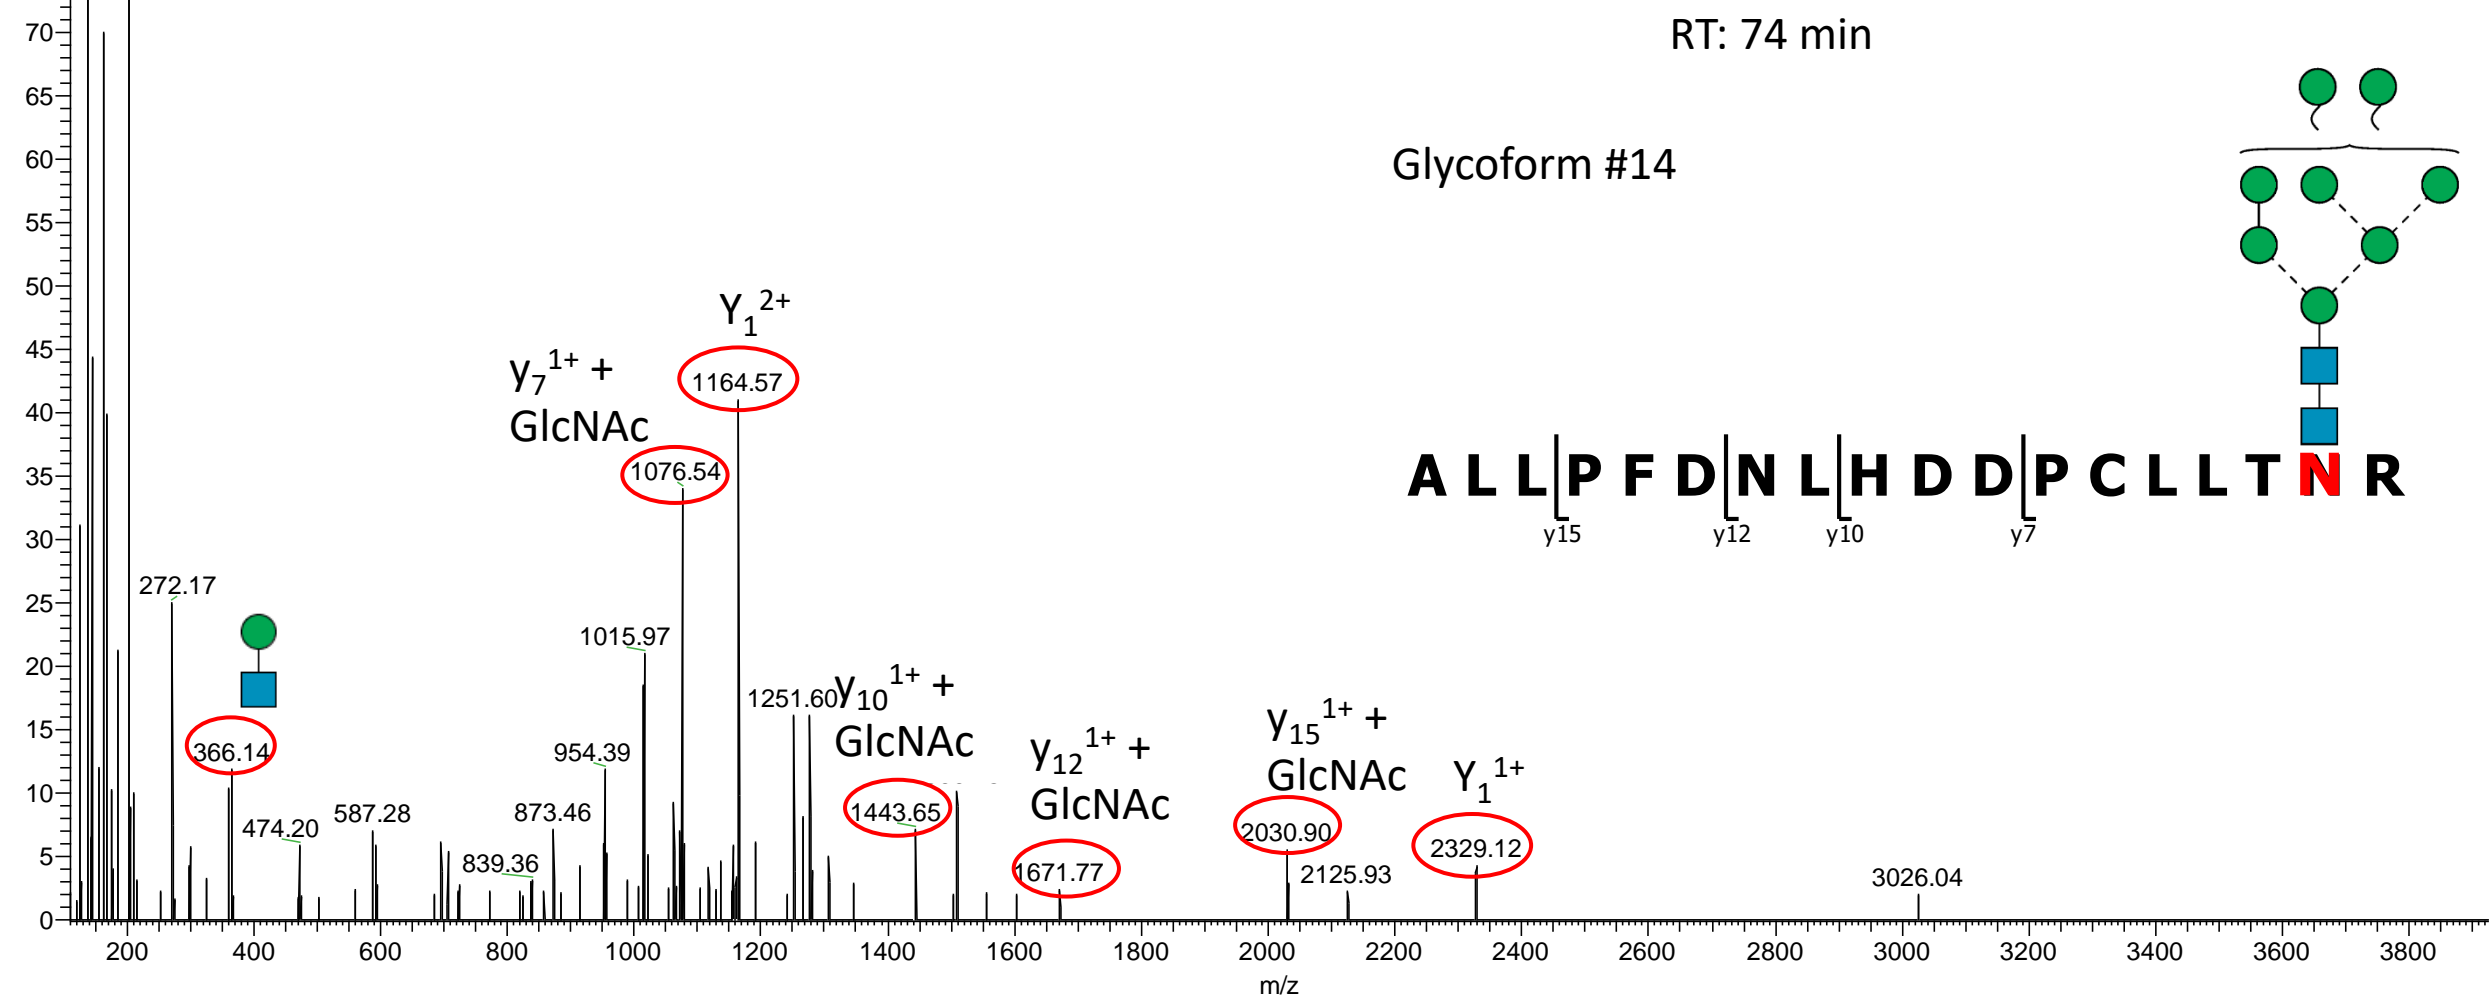

Human myeloperoxidase (P05164)  
 ALLPFDNLHDDPCLLT**N**R (Asn391 peptide)  
 Obs.  $m/z$  1225.21 (3+)  
 Glycan: 1548.55 Da (GlcNAc<sub>3</sub>Hex<sub>4</sub>NeuAc<sub>1</sub>)  
 Obs.  $[M+H]^+$  = 3673.63 Da  
 Calc.  $[M+H]^+$  = 3672.59 Da  
 Off-by-x (manual) : 1  
 RT: 79 min

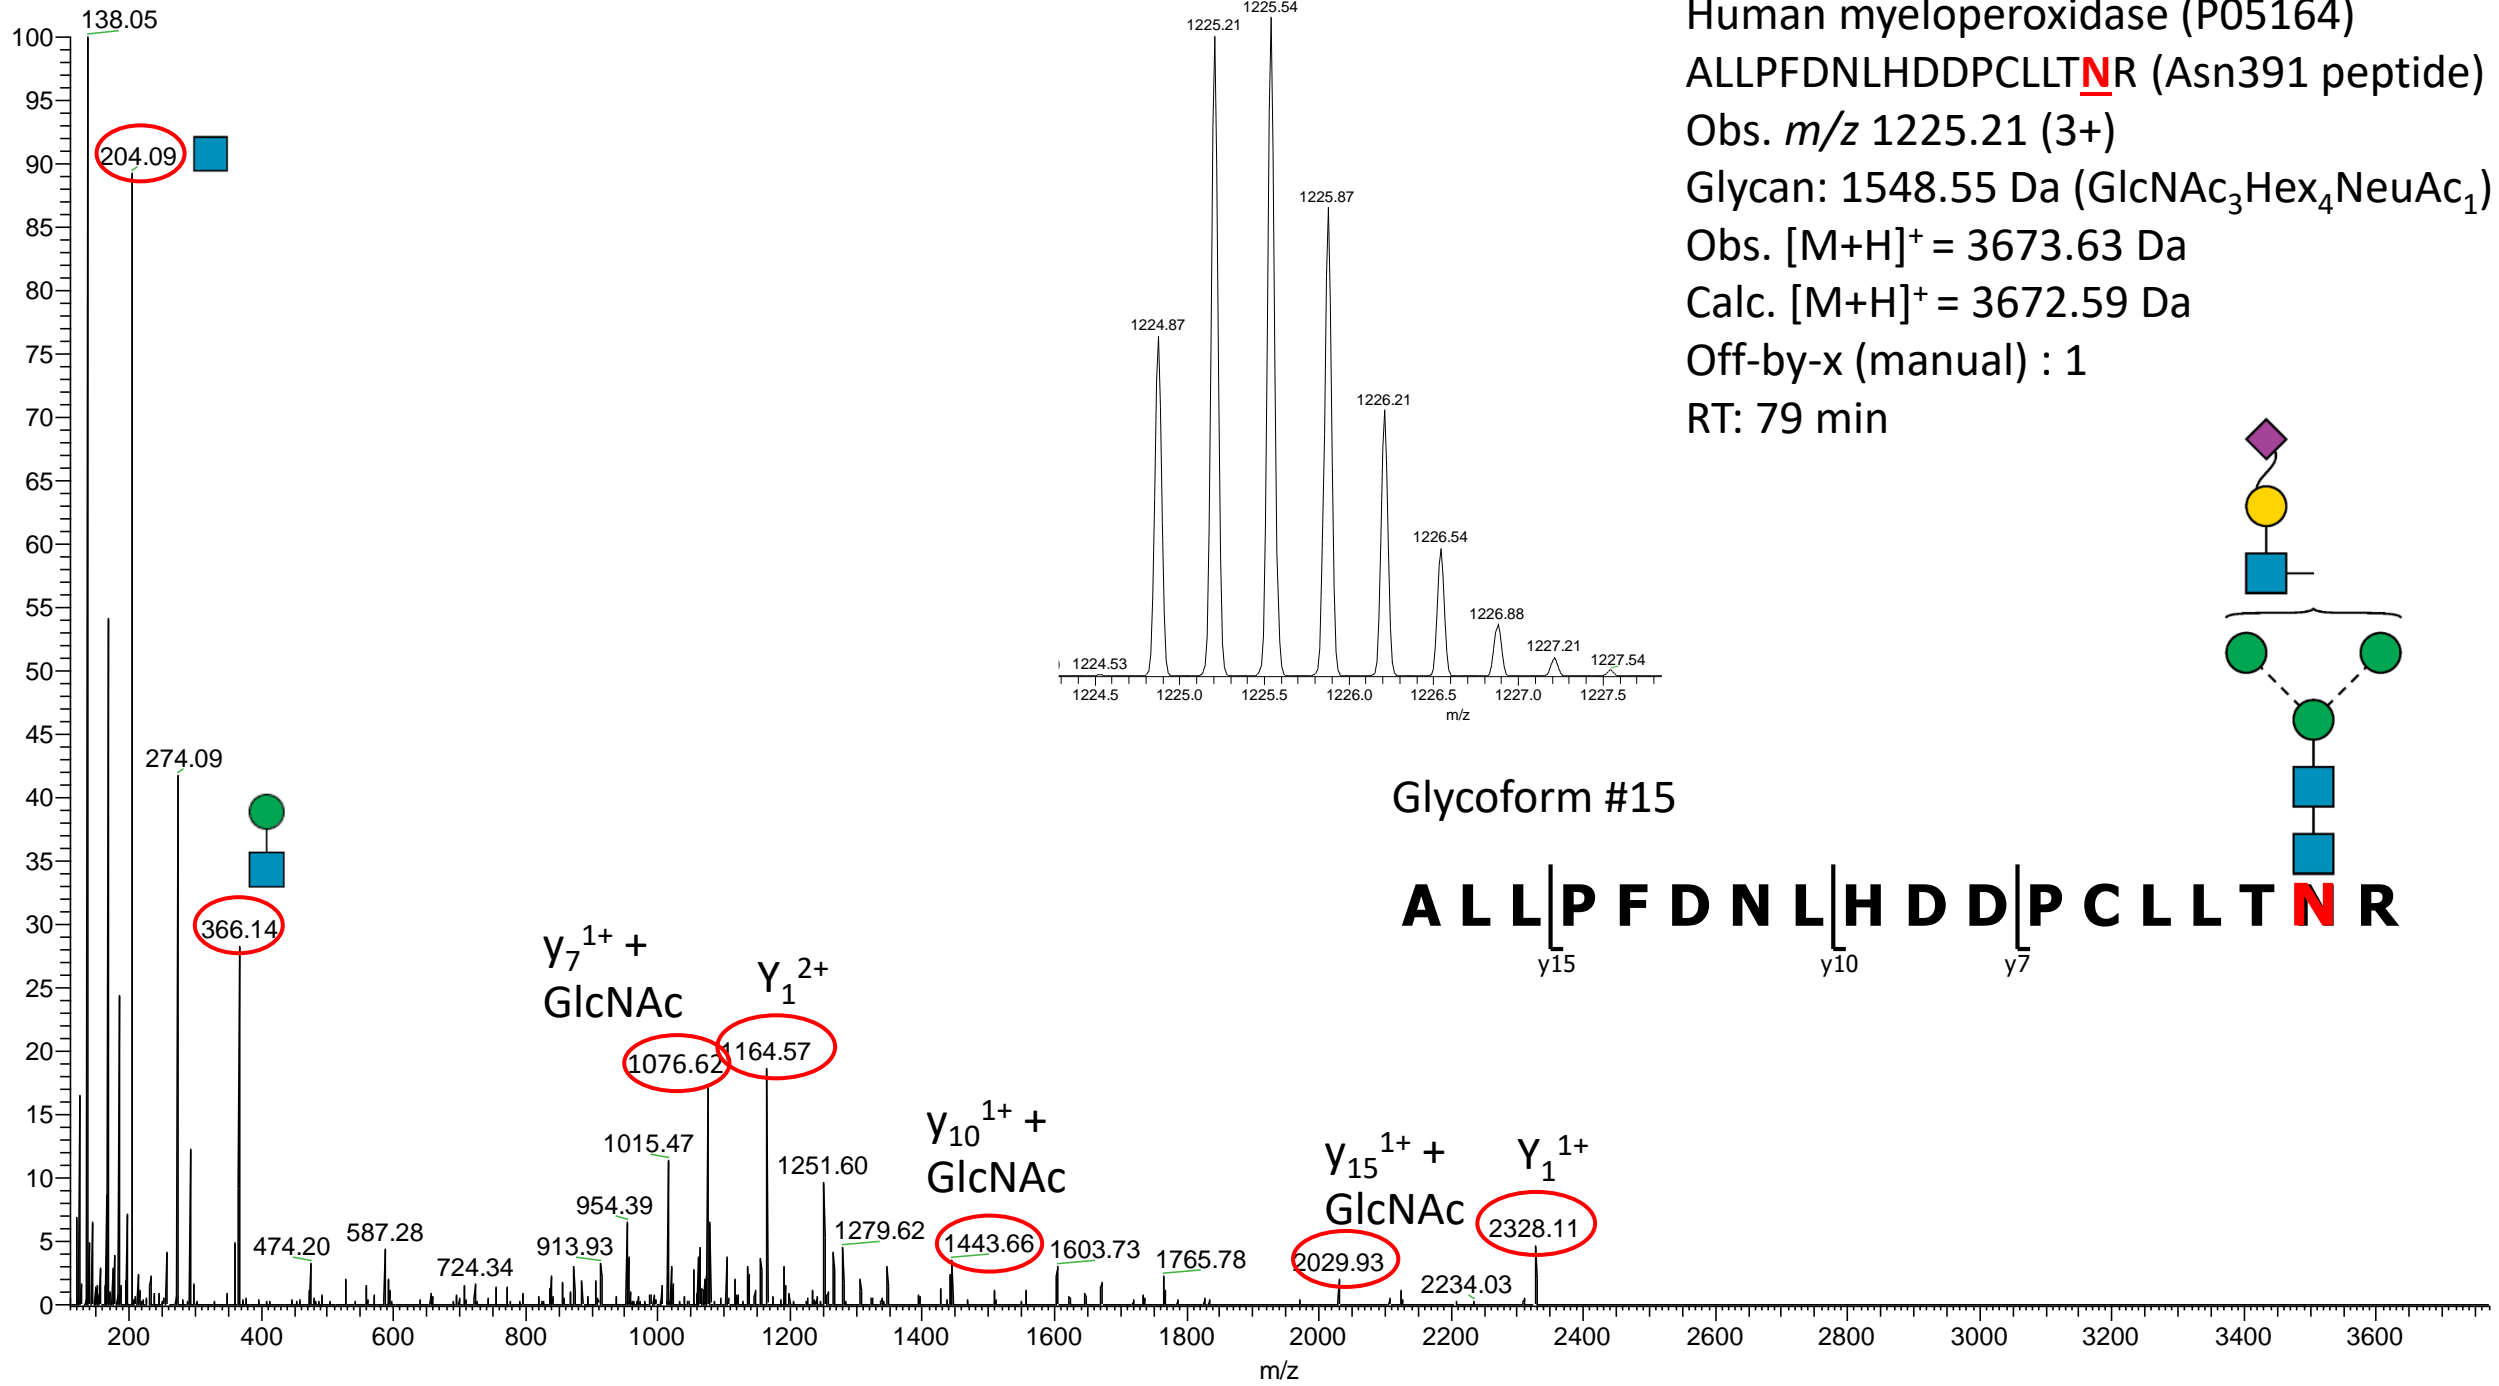



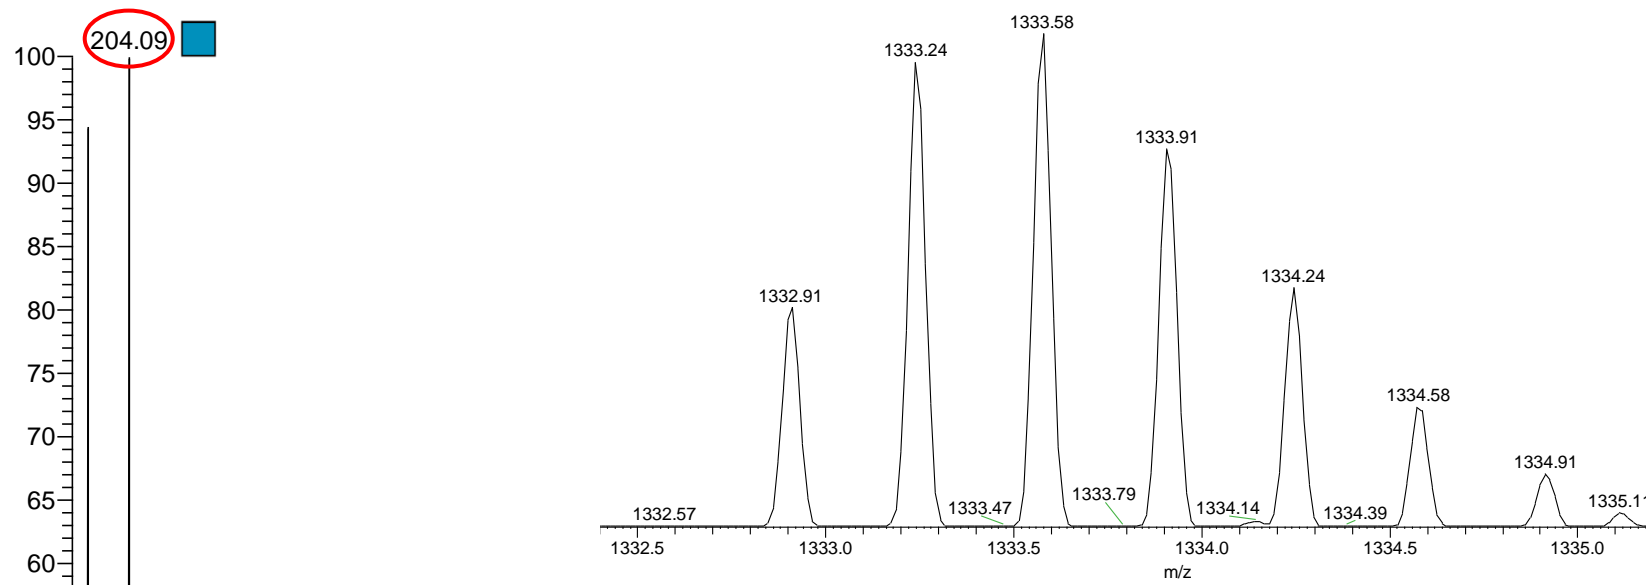

Human myeloperoxidase (P05164)  
 ALLPFDNLHDDPCLLT**N**R (Asn391 peptide)  
 Obs.  $m/z$  1333.58 (3+)  
 Glycan: 1872.65 Da (GlcNAc<sub>3</sub>Hex<sub>6</sub>NeuAc<sub>1</sub>)  
 Obs.  $[M+H]^+$  = 3998.74 Da  
 Calc.  $[M+H]^+$  = 3996.70 Da  
 Off-by-X (Manual) : 2  
 RT: 78 min

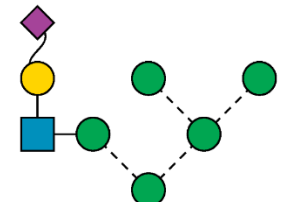

Glycoform #17

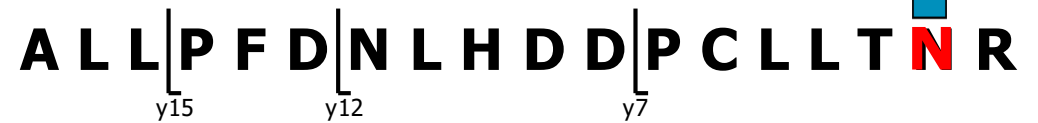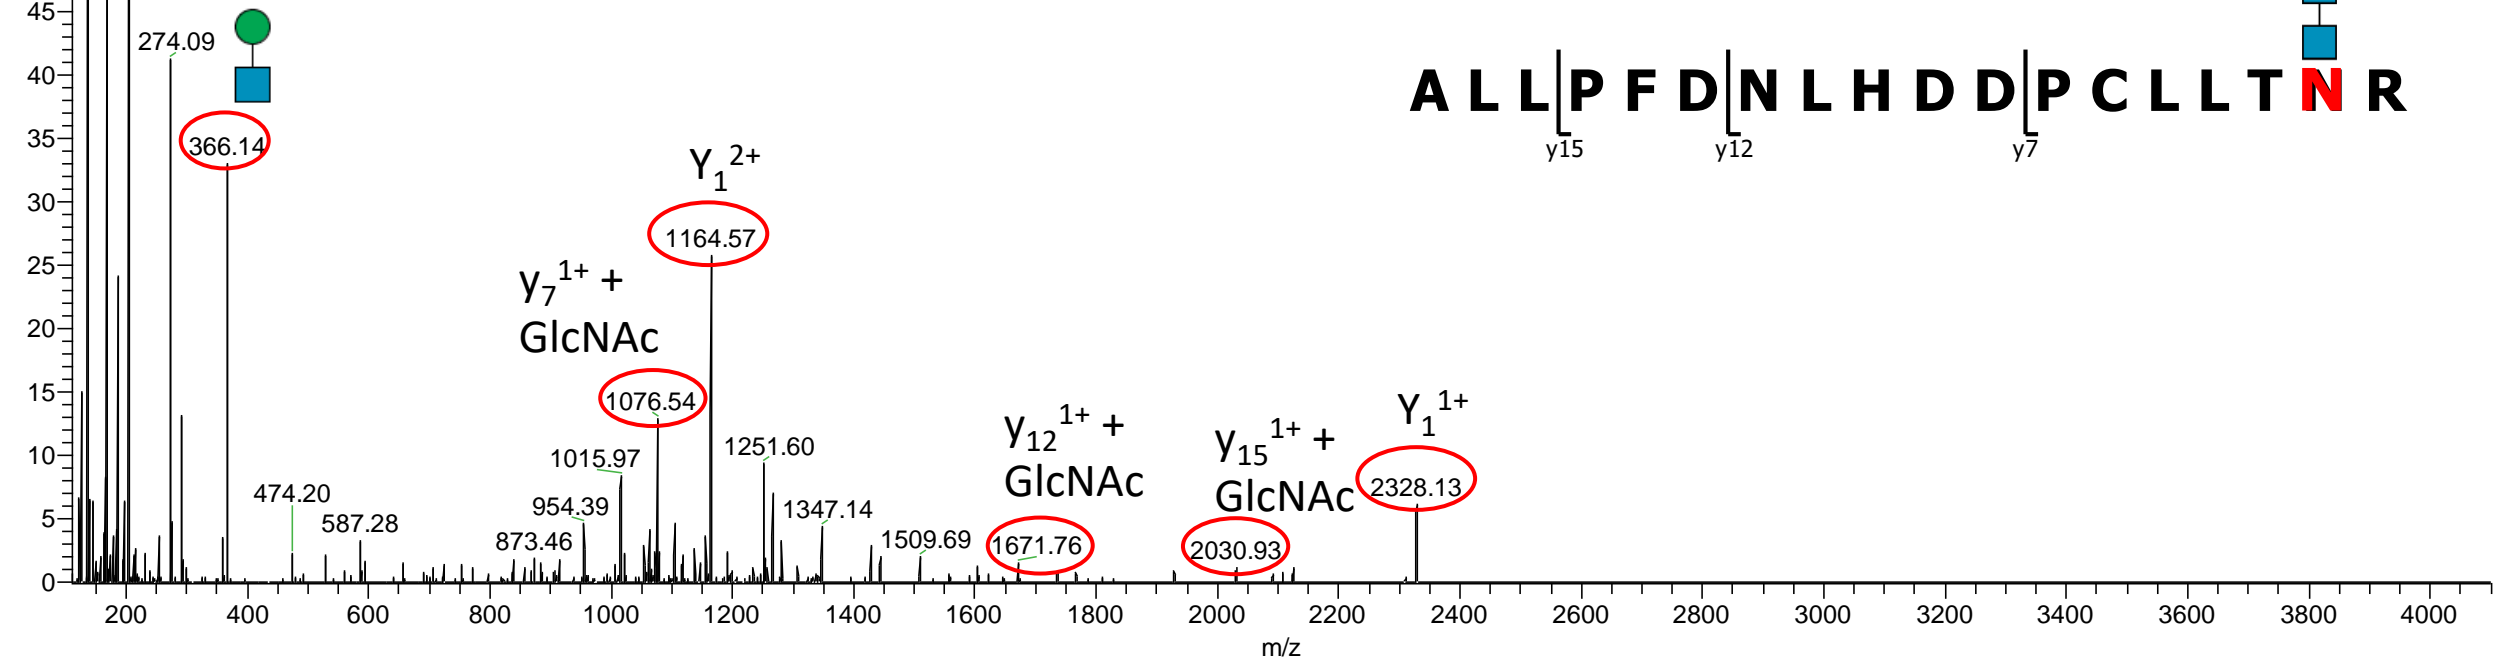

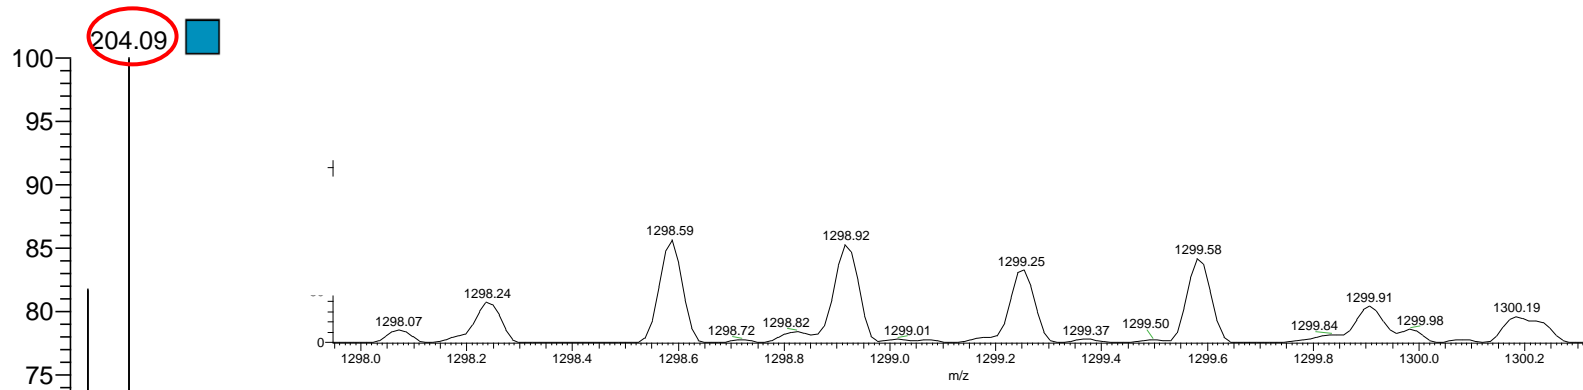

Human myeloperoxidase (P05164)  
 ALLPFDNLHDDPCLLT**N**R (Asn391 peptide)  
 Obs.  $m/z$  1298.91 (3+)  
 Glycan: 1768.64 Da (GlcNAc<sub>4</sub>Hex<sub>5</sub>Fuc<sub>1</sub>)  
 Obs.  $[M+H]^+$  = 3894.73 Da  
 Calc.  $[M+H]^+$  = 3892.69 Da  
 Off-by-X (manual) : 2  
 RT: 74 min

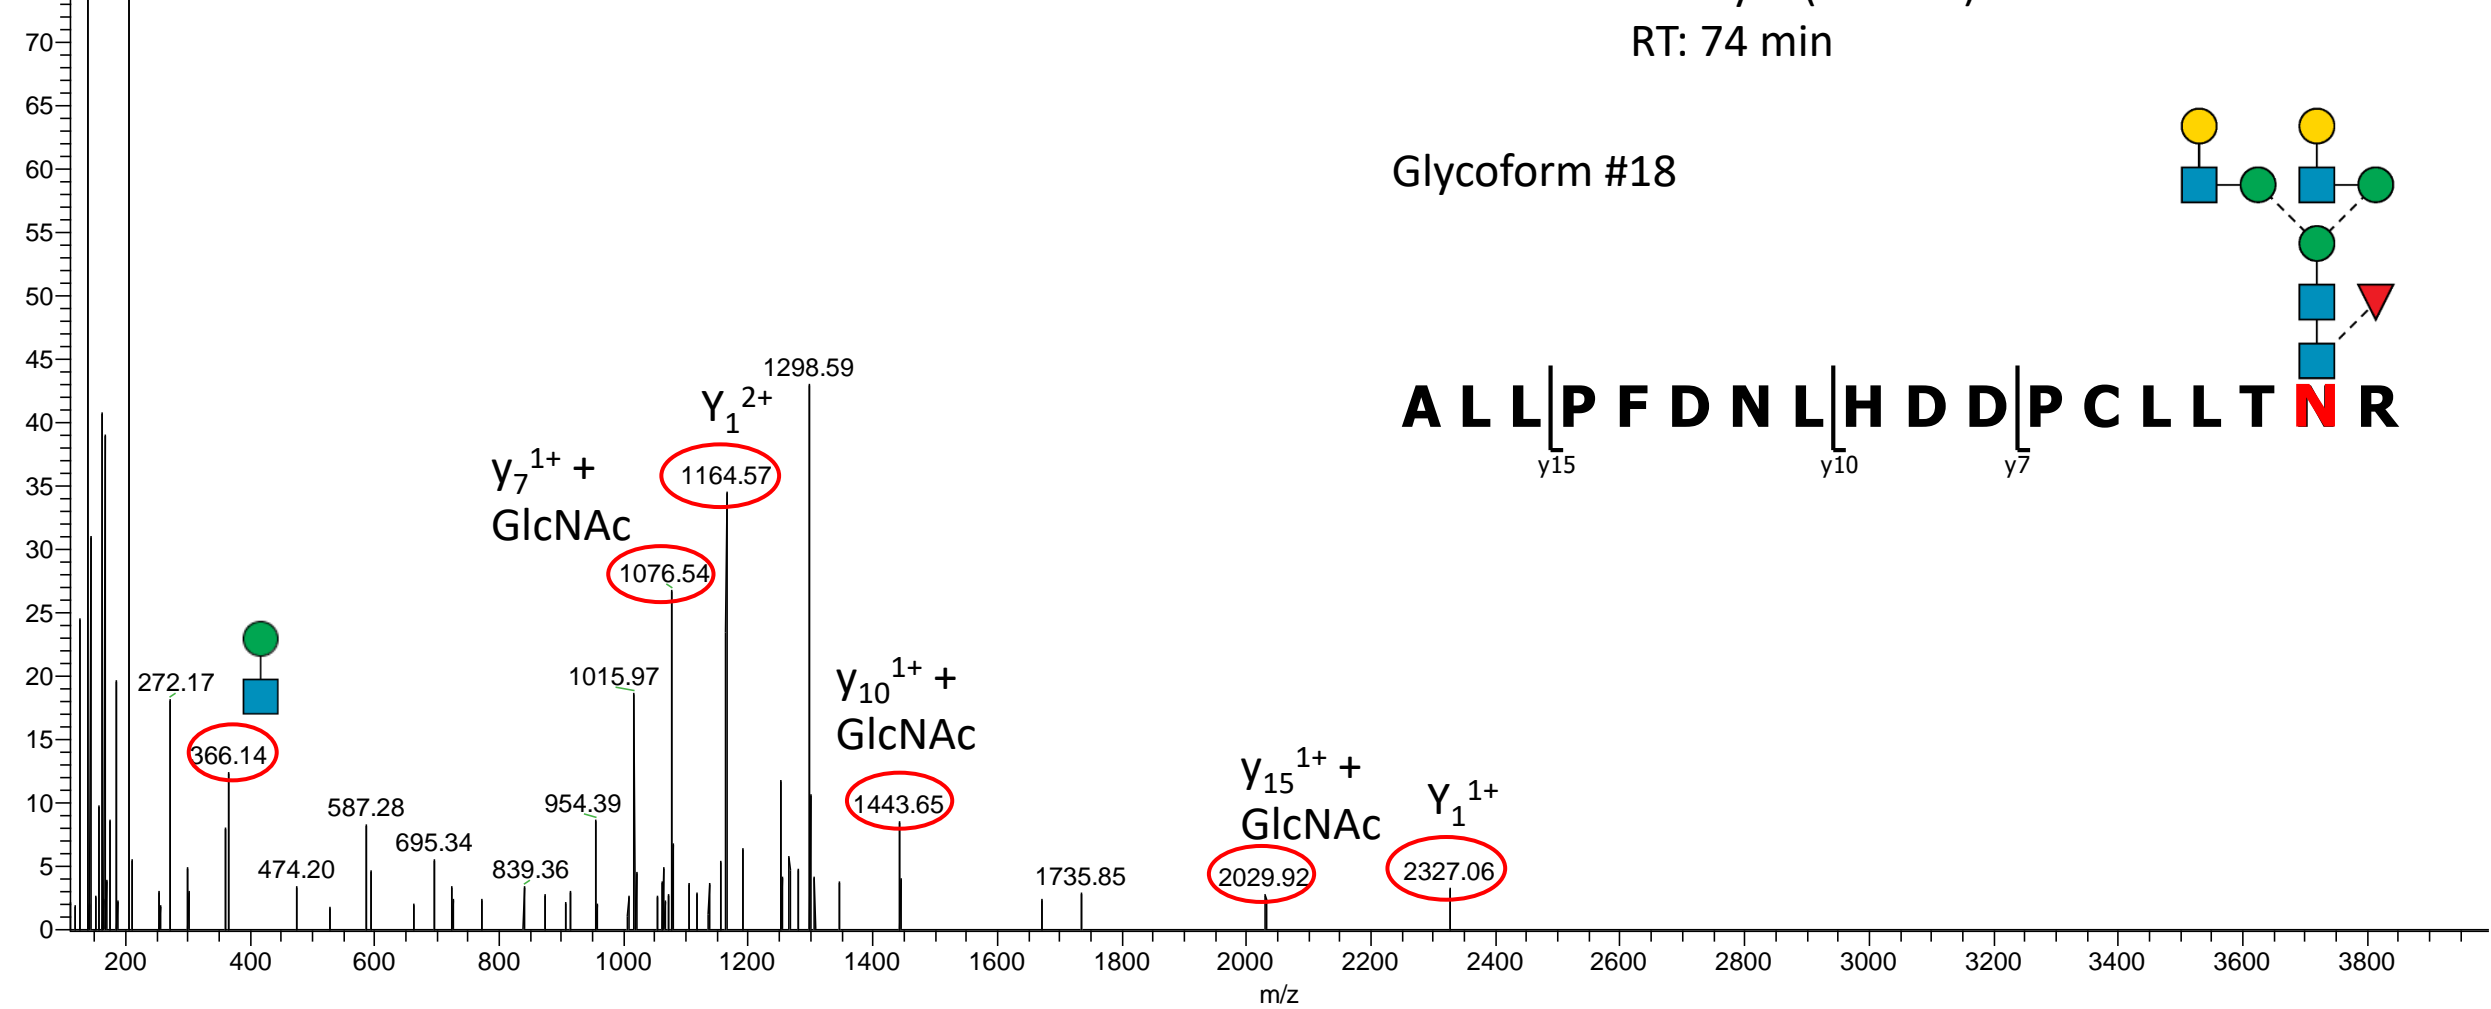

Glycoform #18

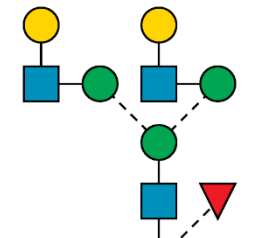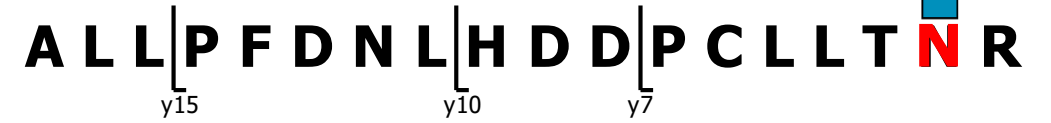



### **Supplementary Data S3D**

Manually annotated reversed phase-LC-ESI-HCD-MS/MS (+) spectra of all glycosylated and non-glycosylated peptides containing Asn483 identified from the analysis of the unenriched peptide mixtures of nMPO.

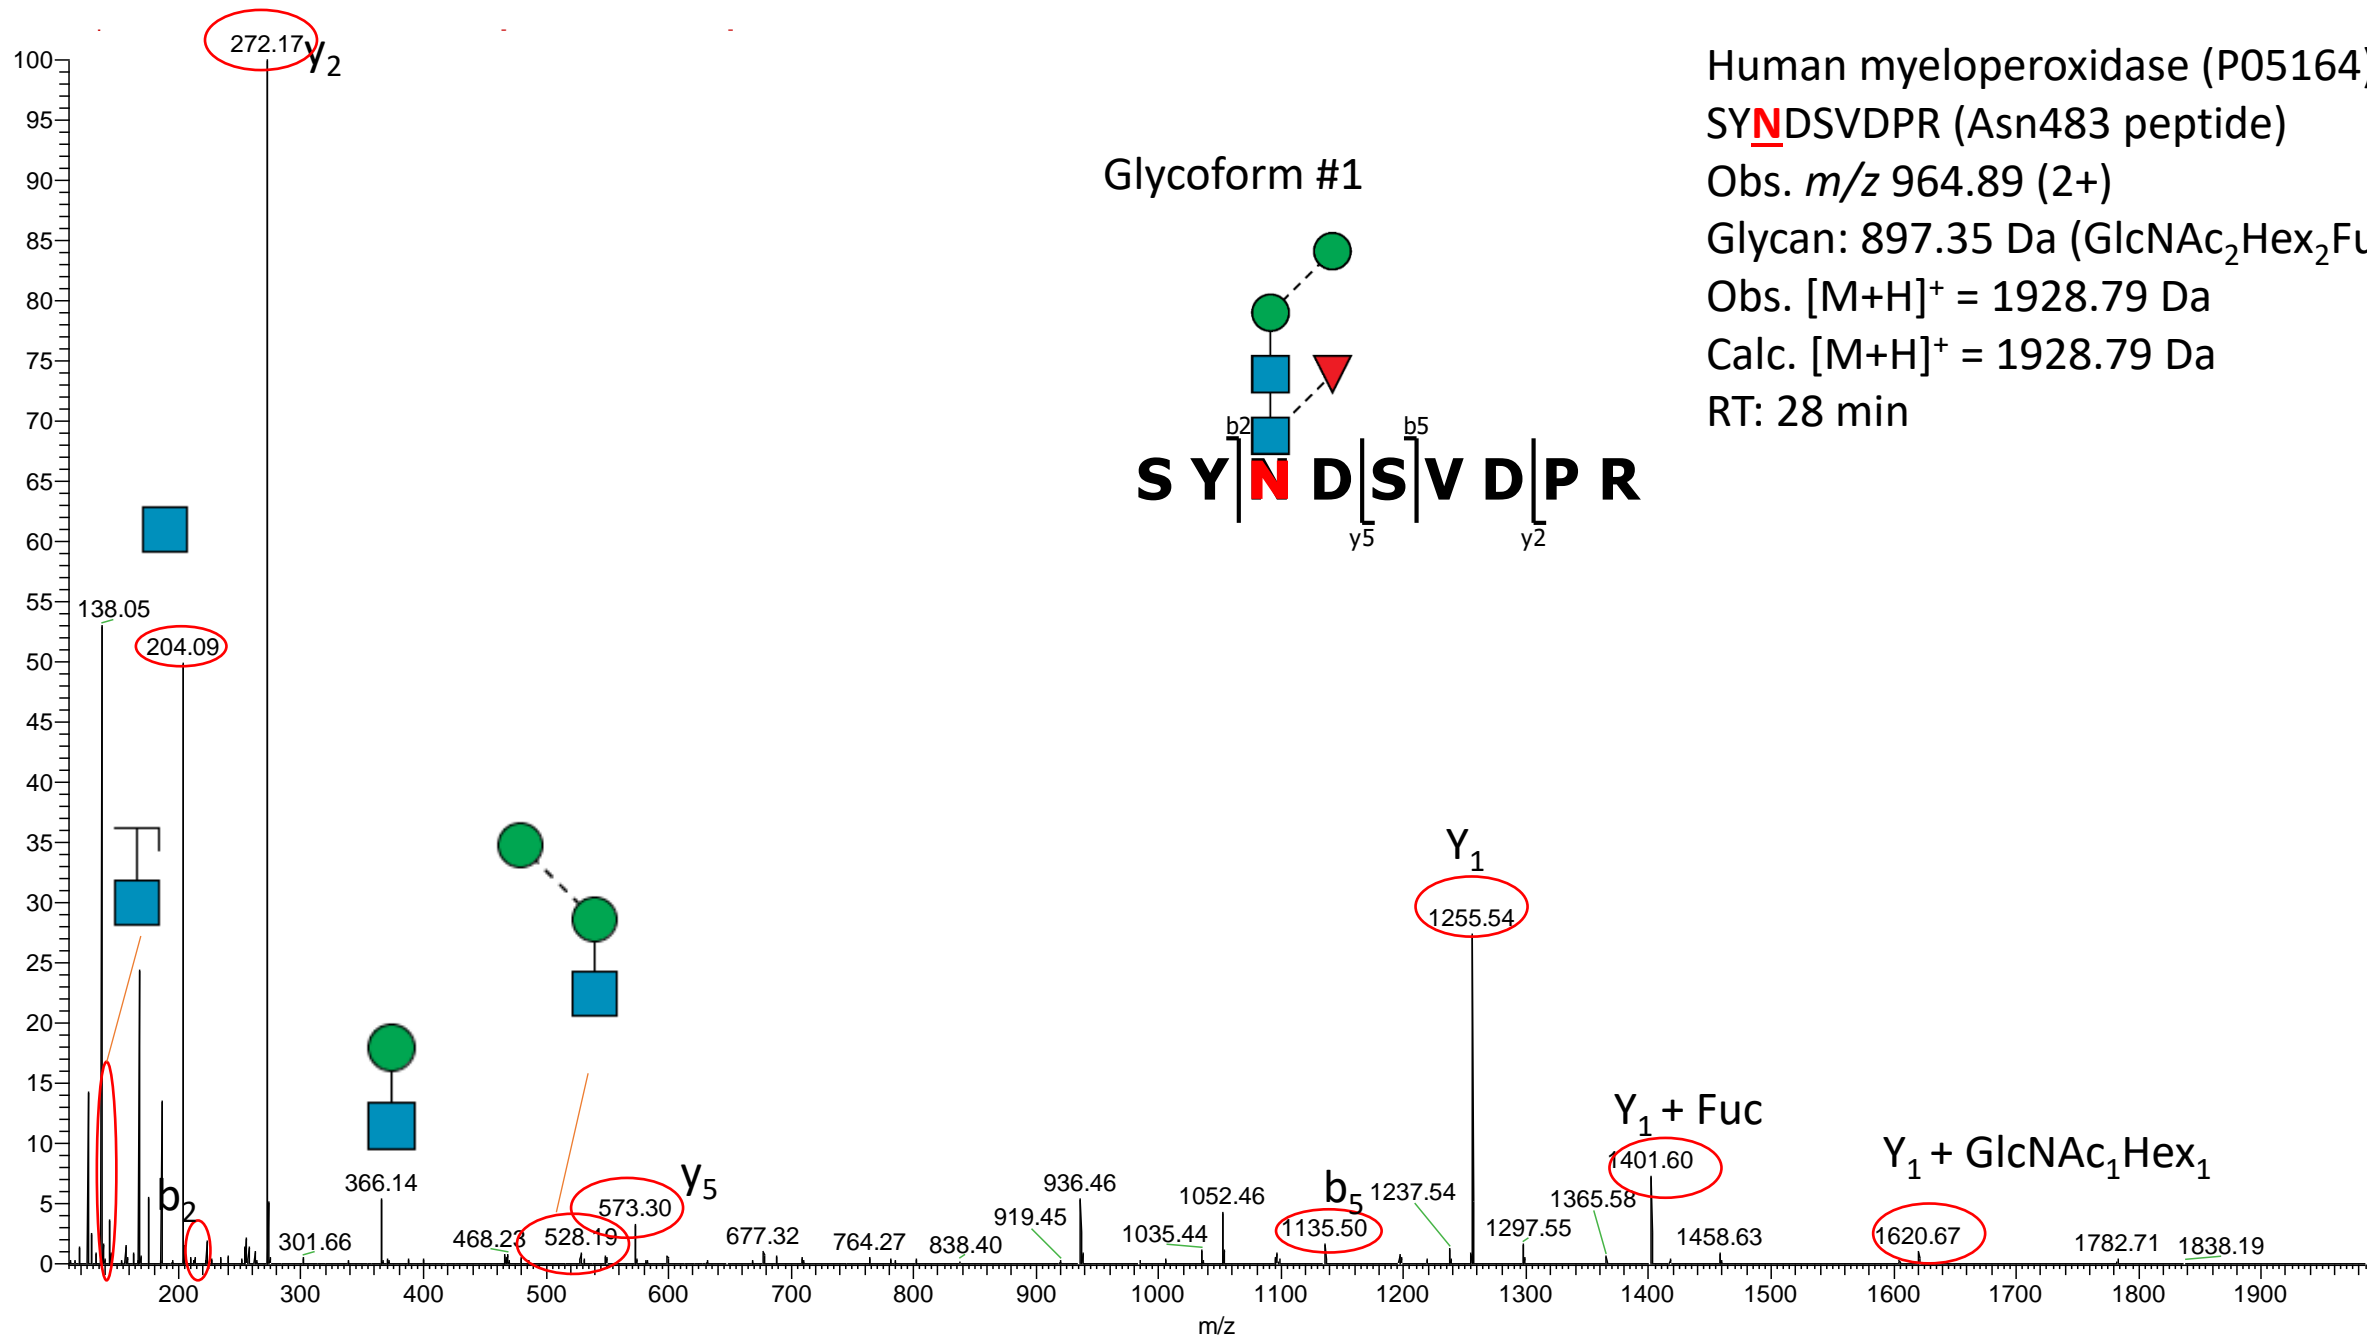

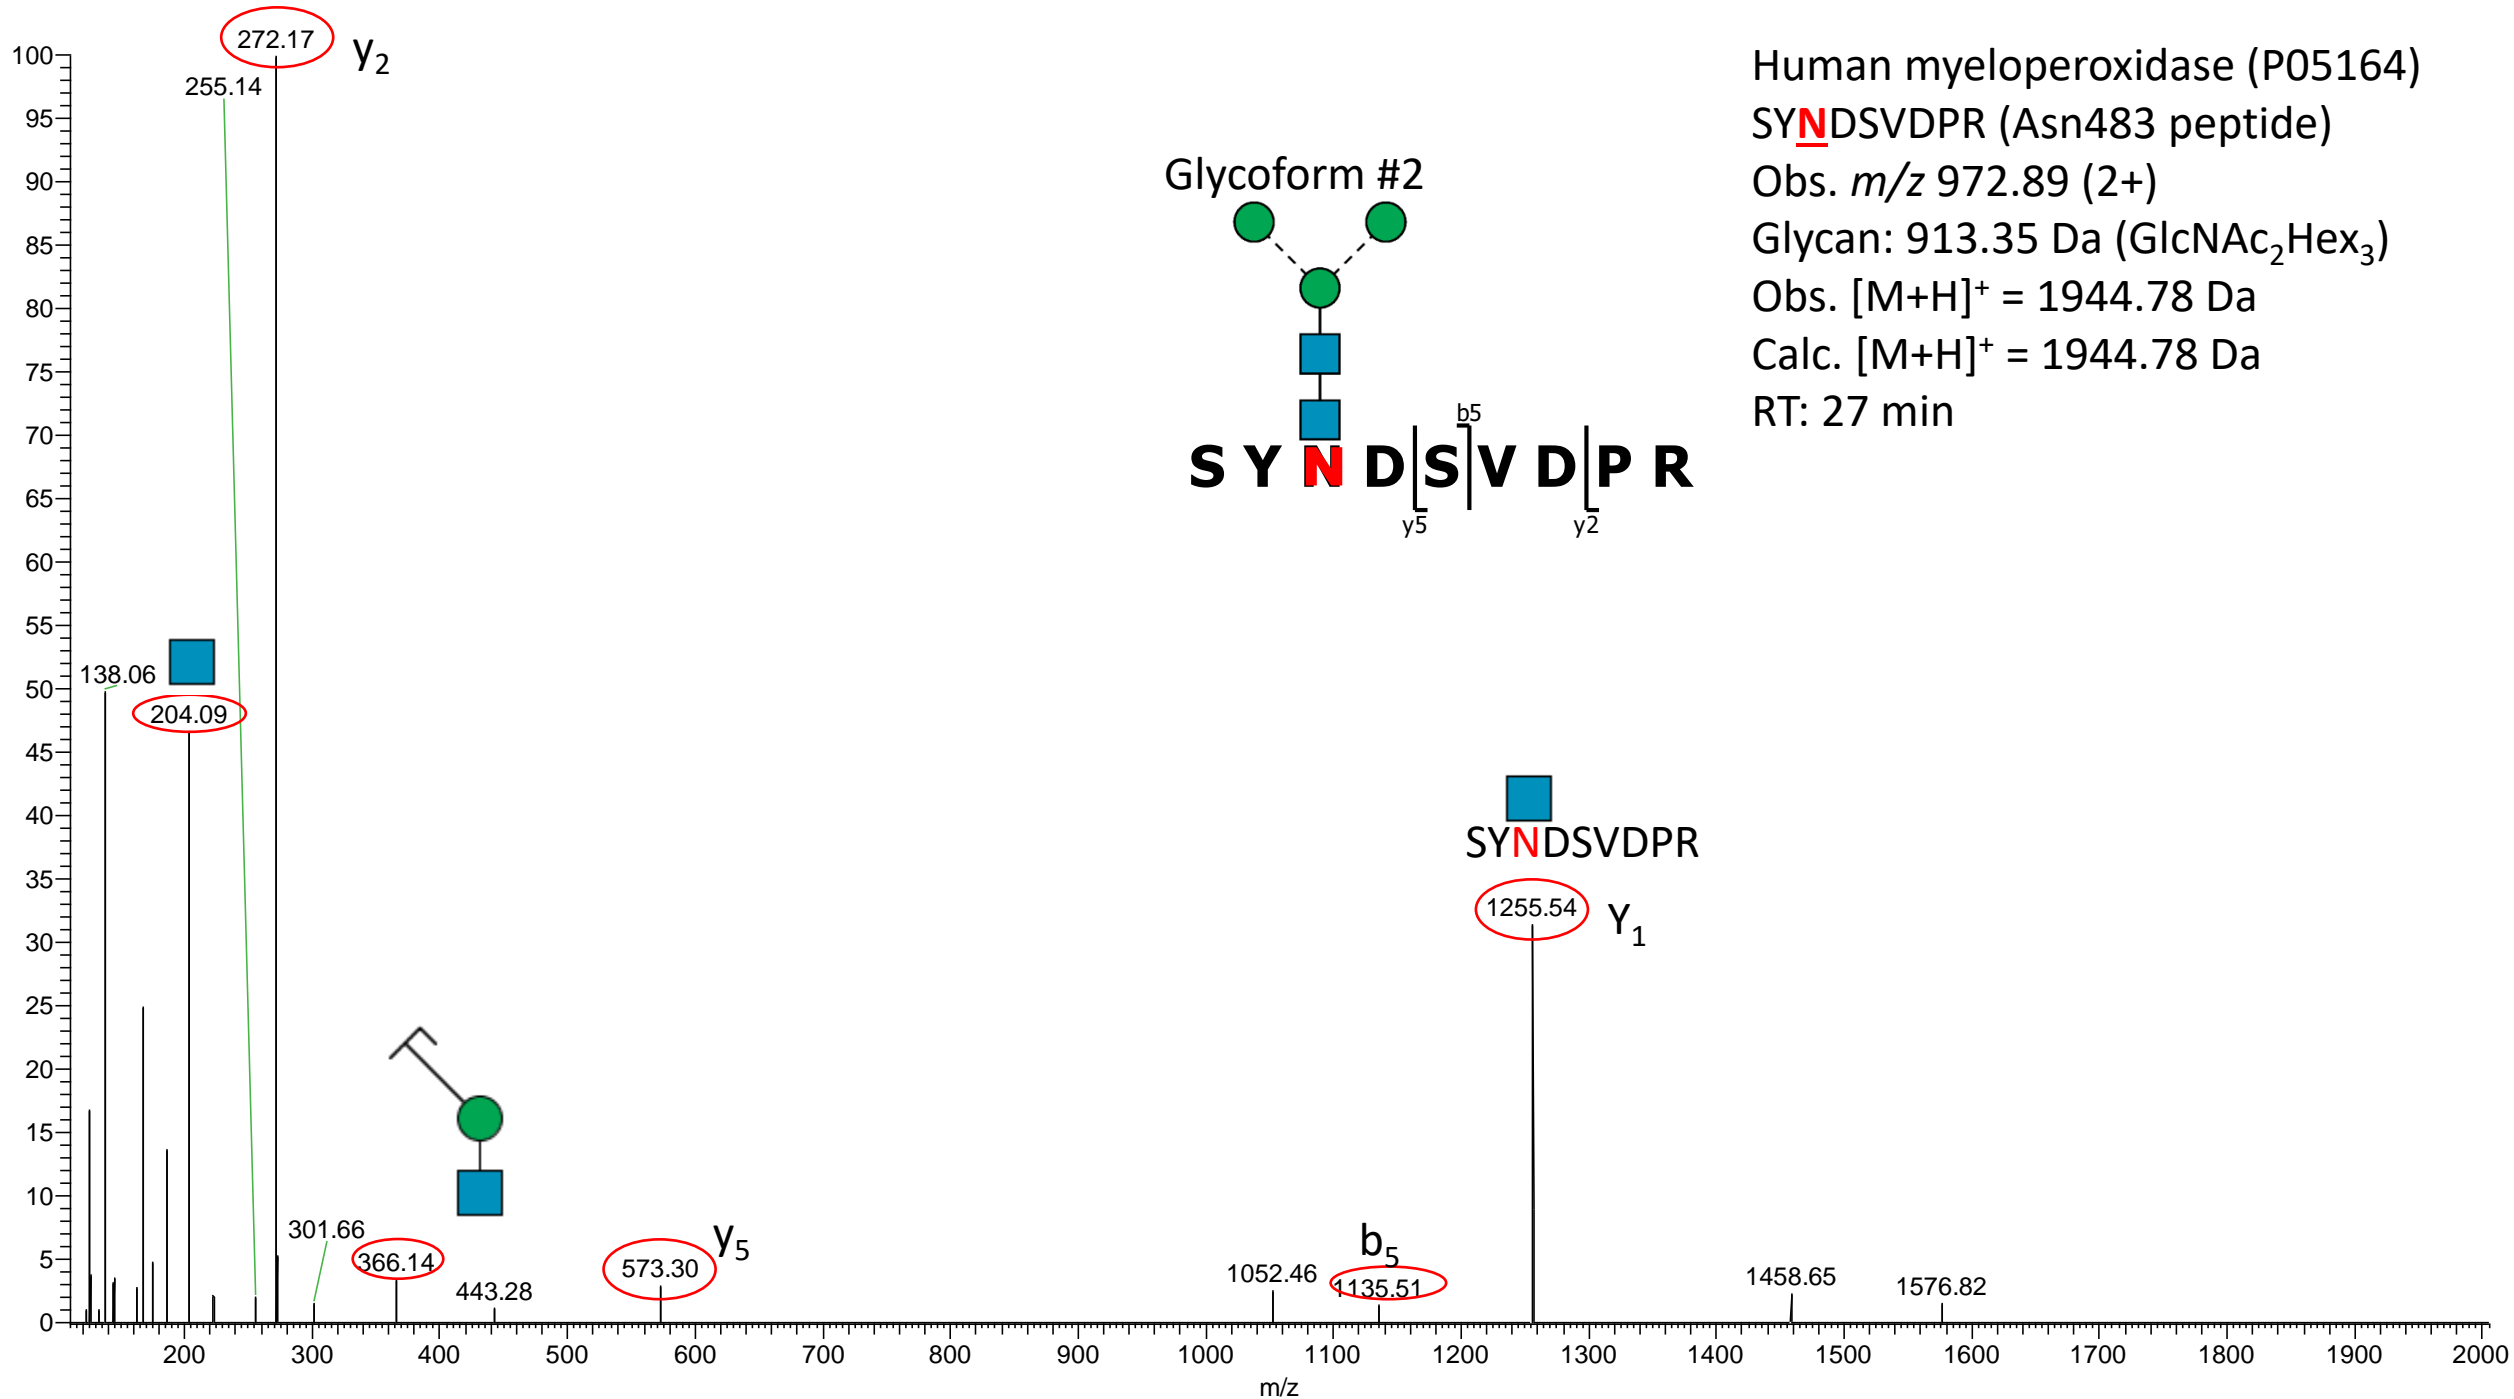

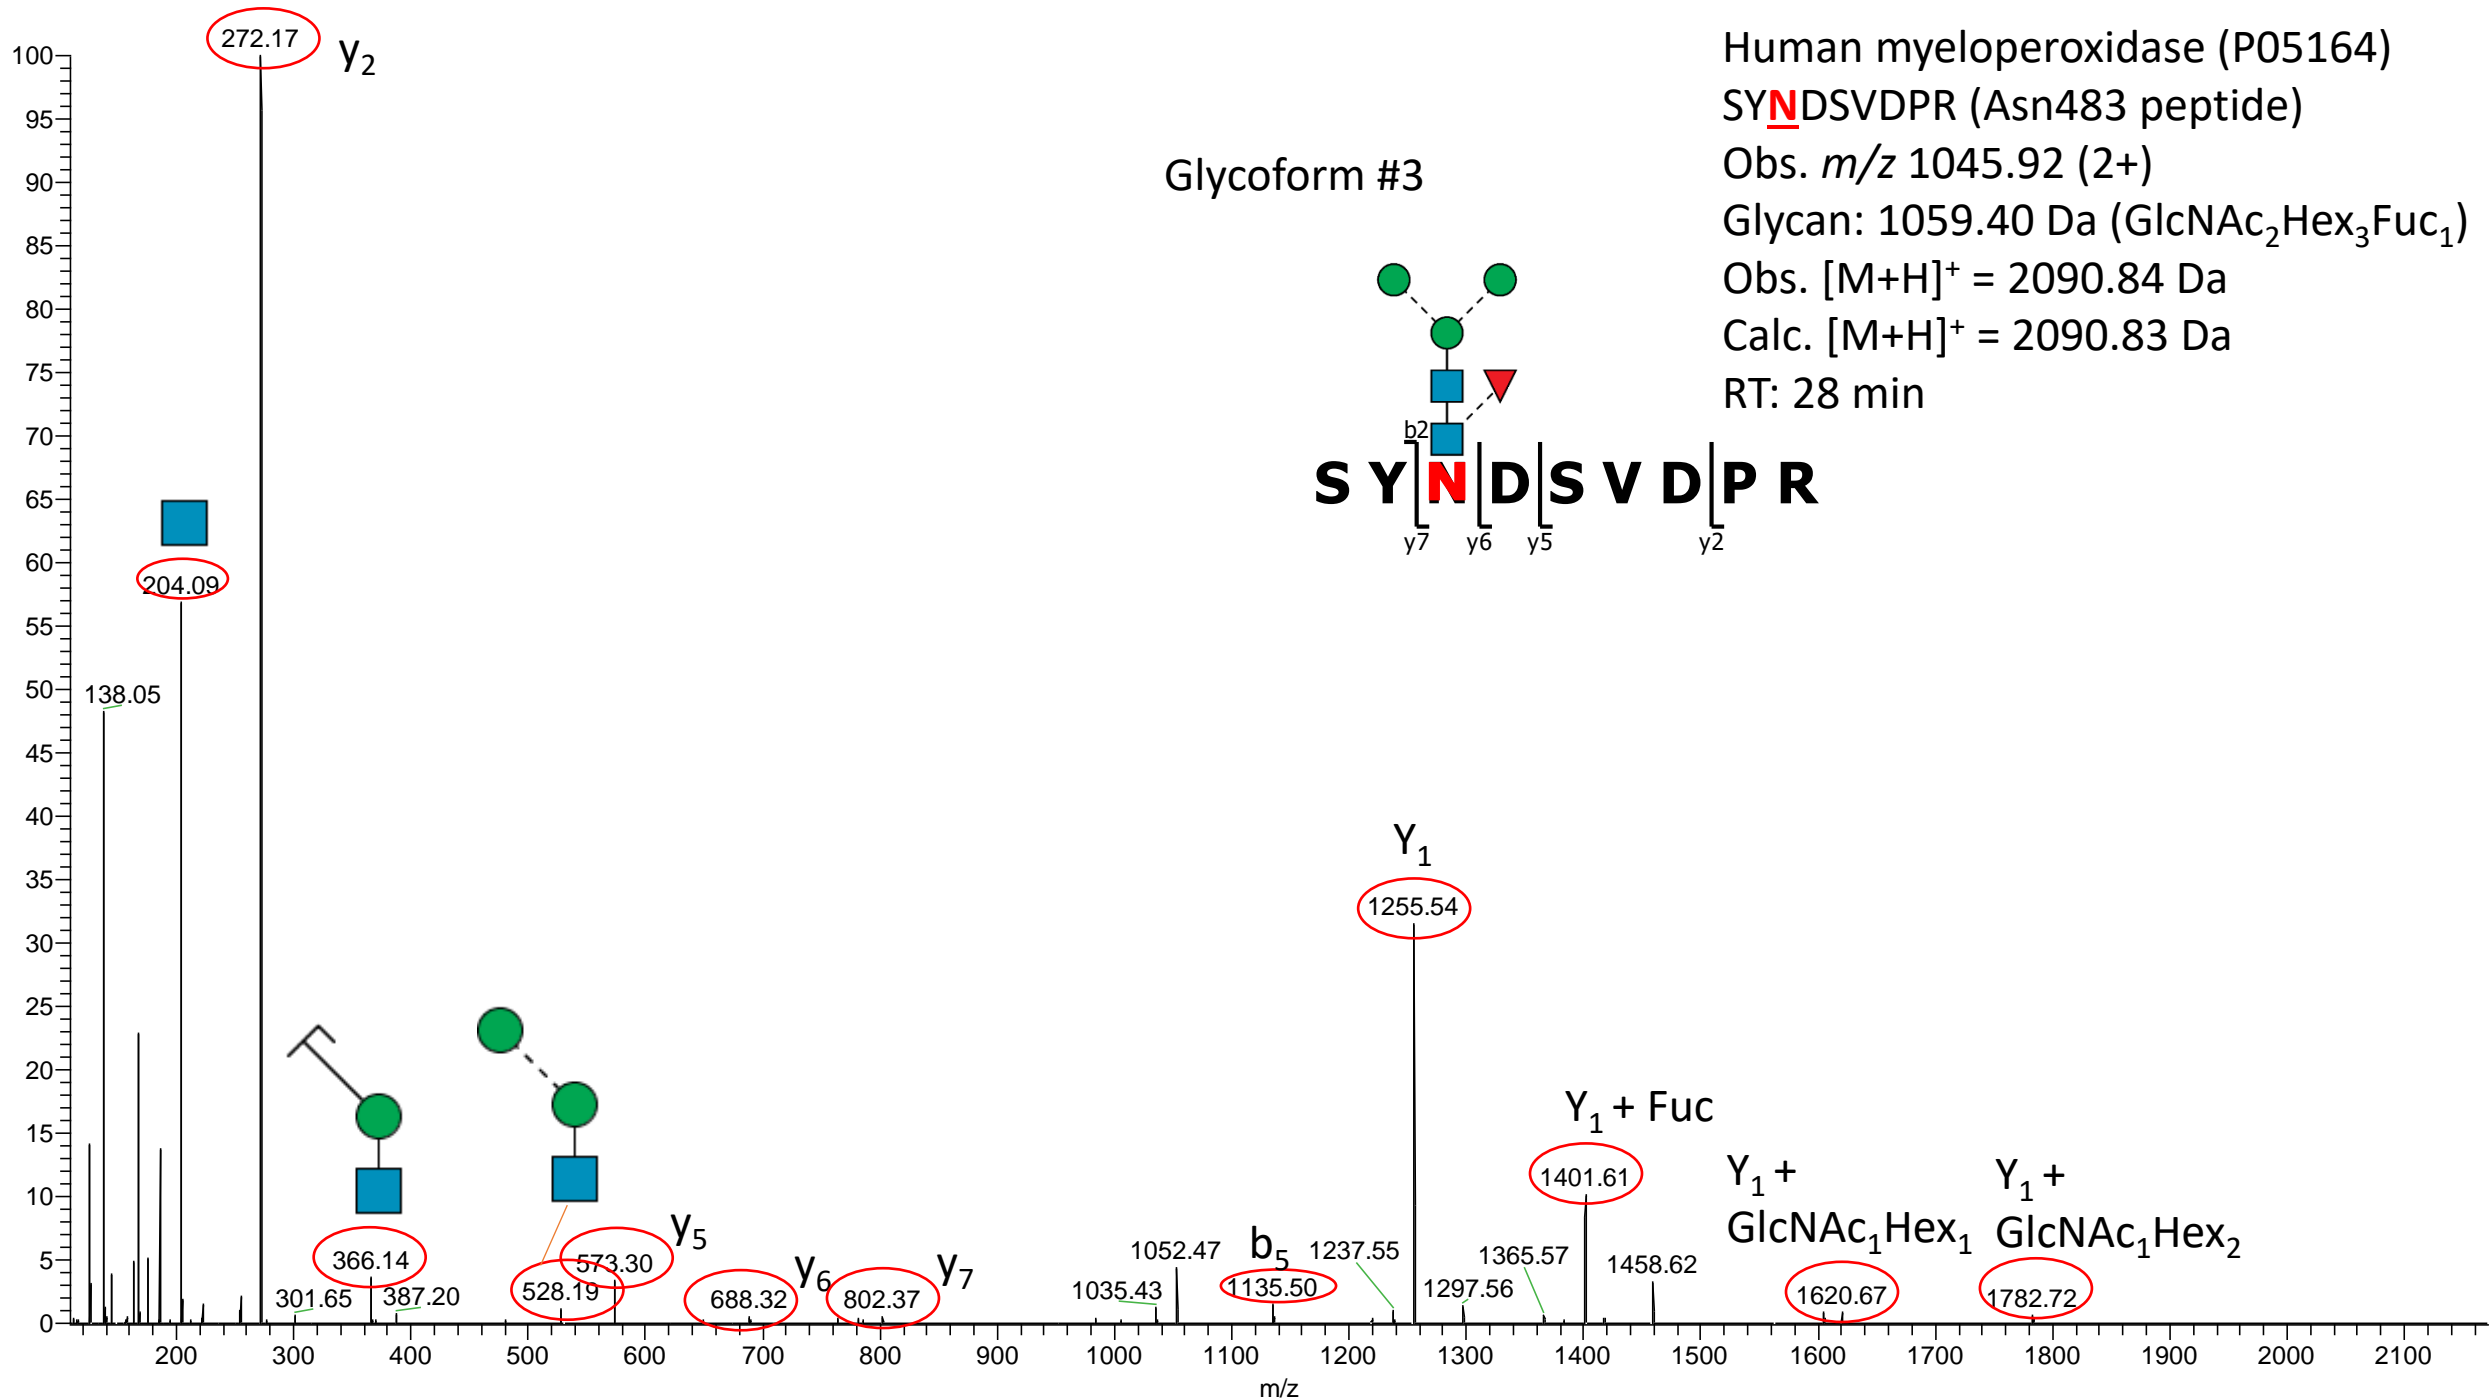

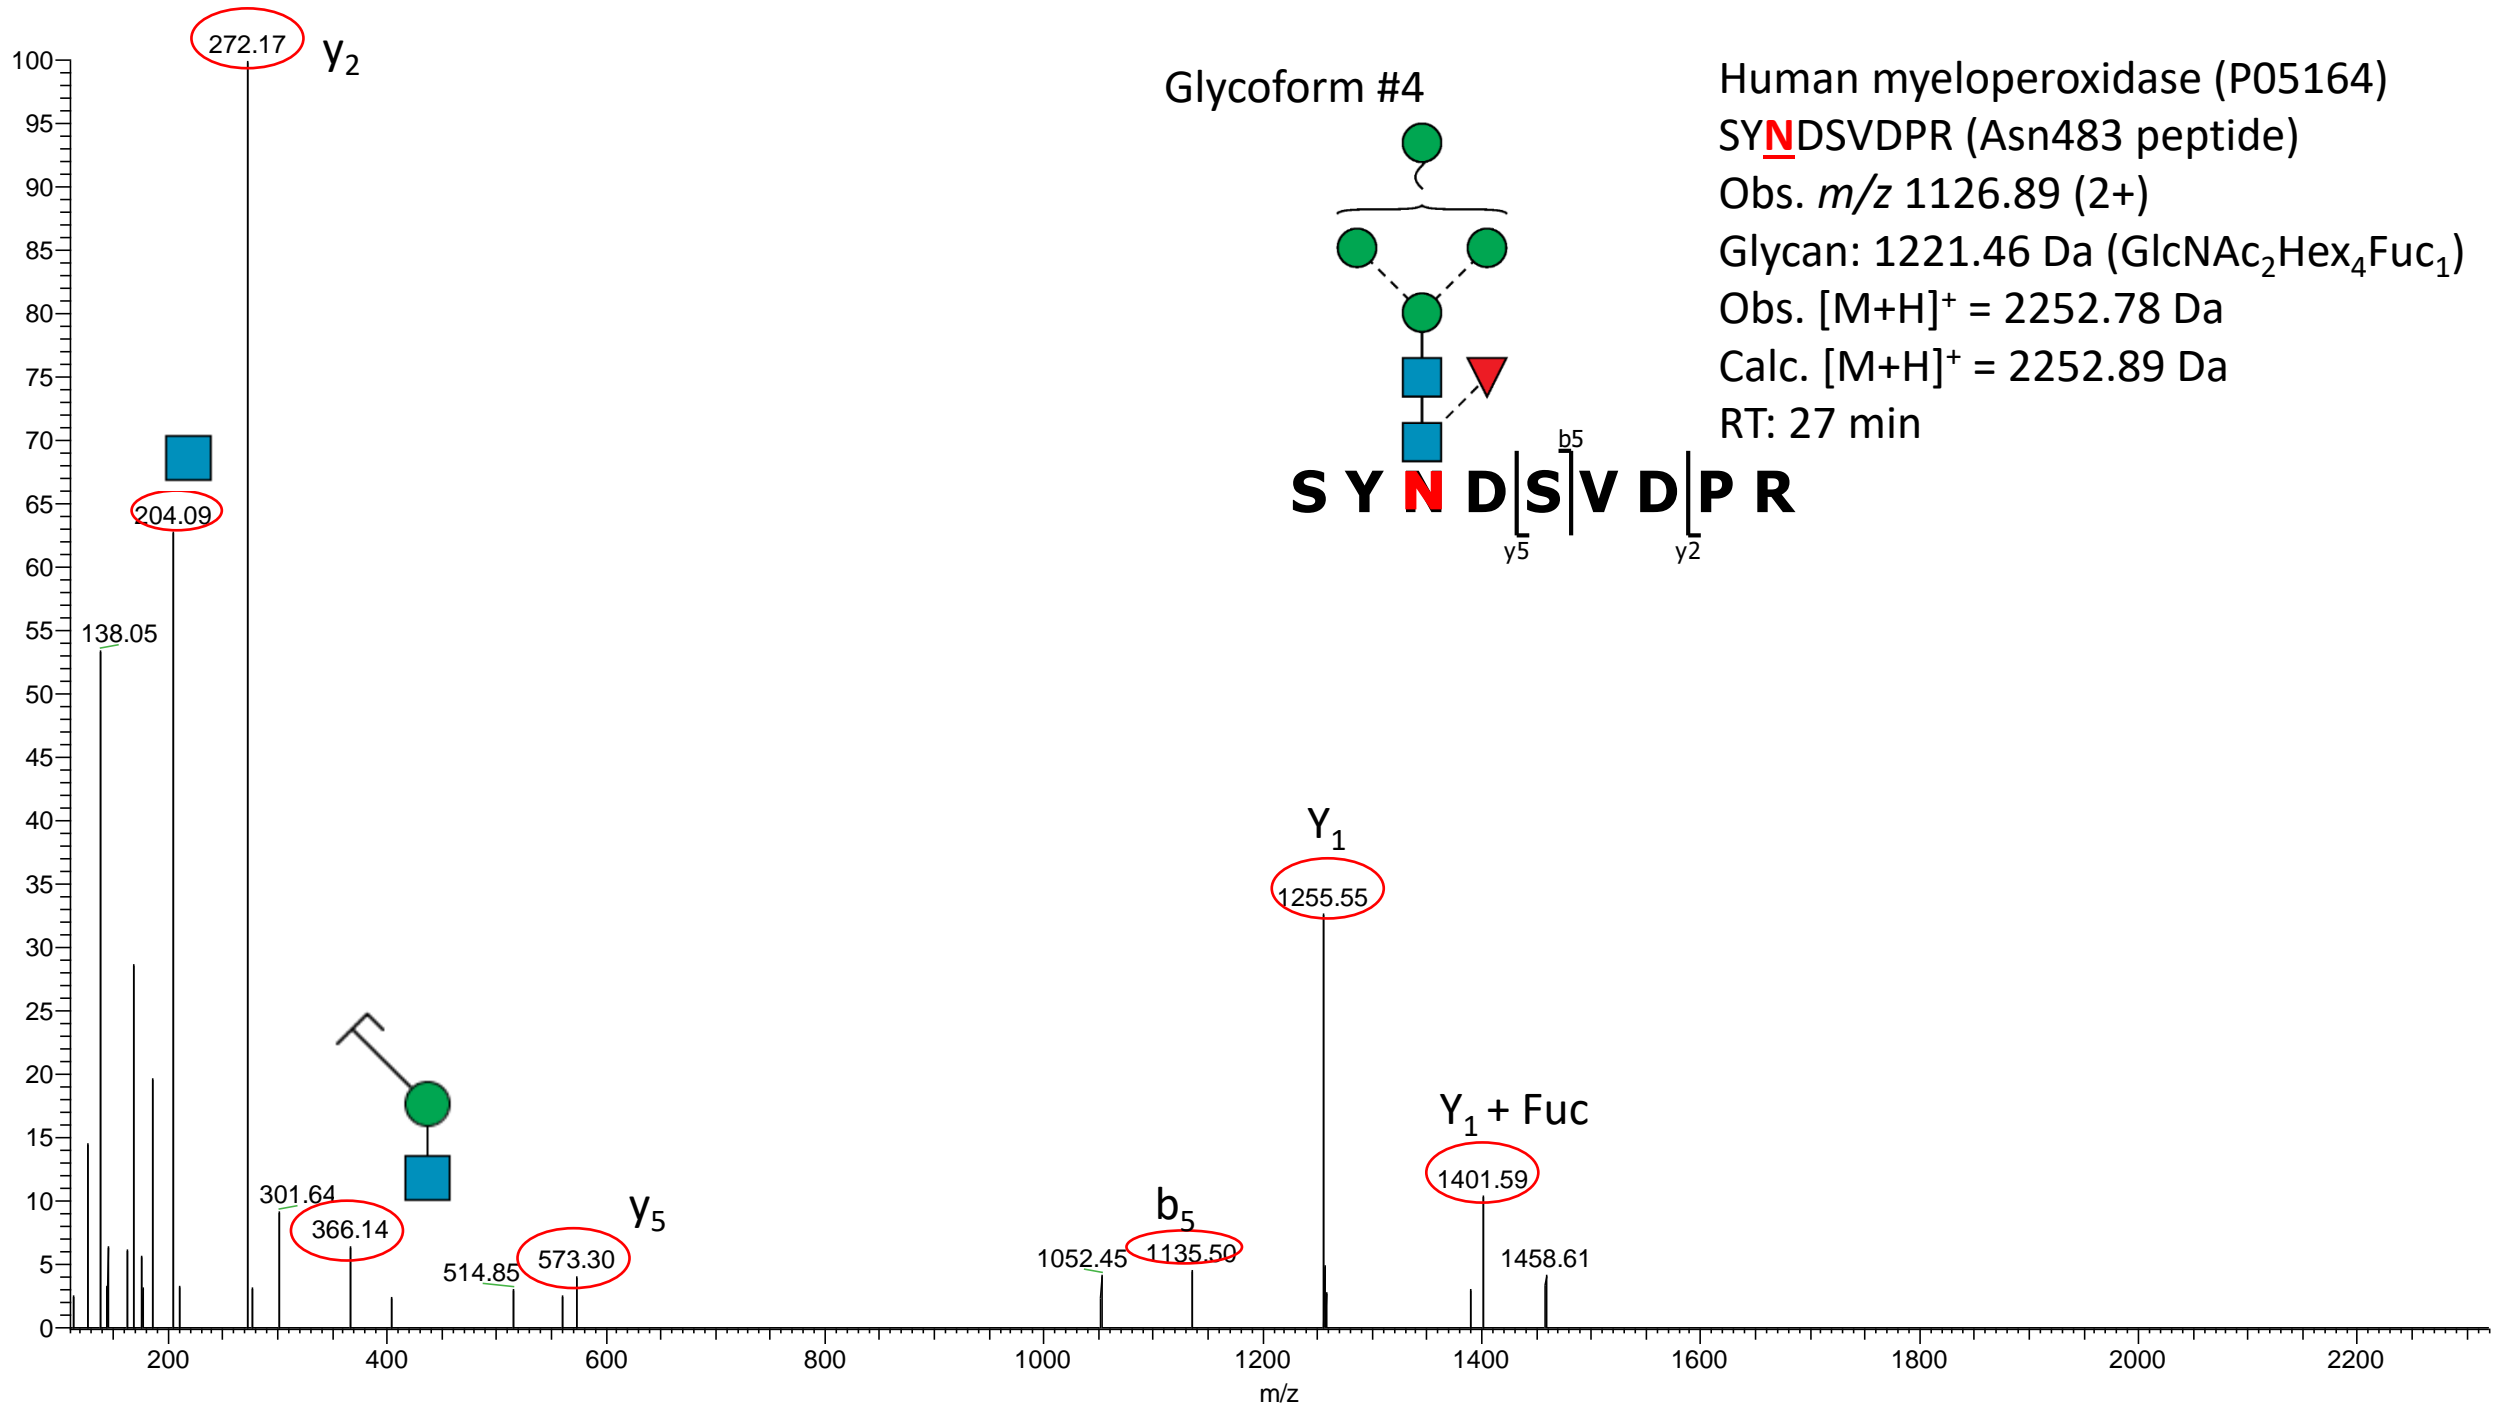

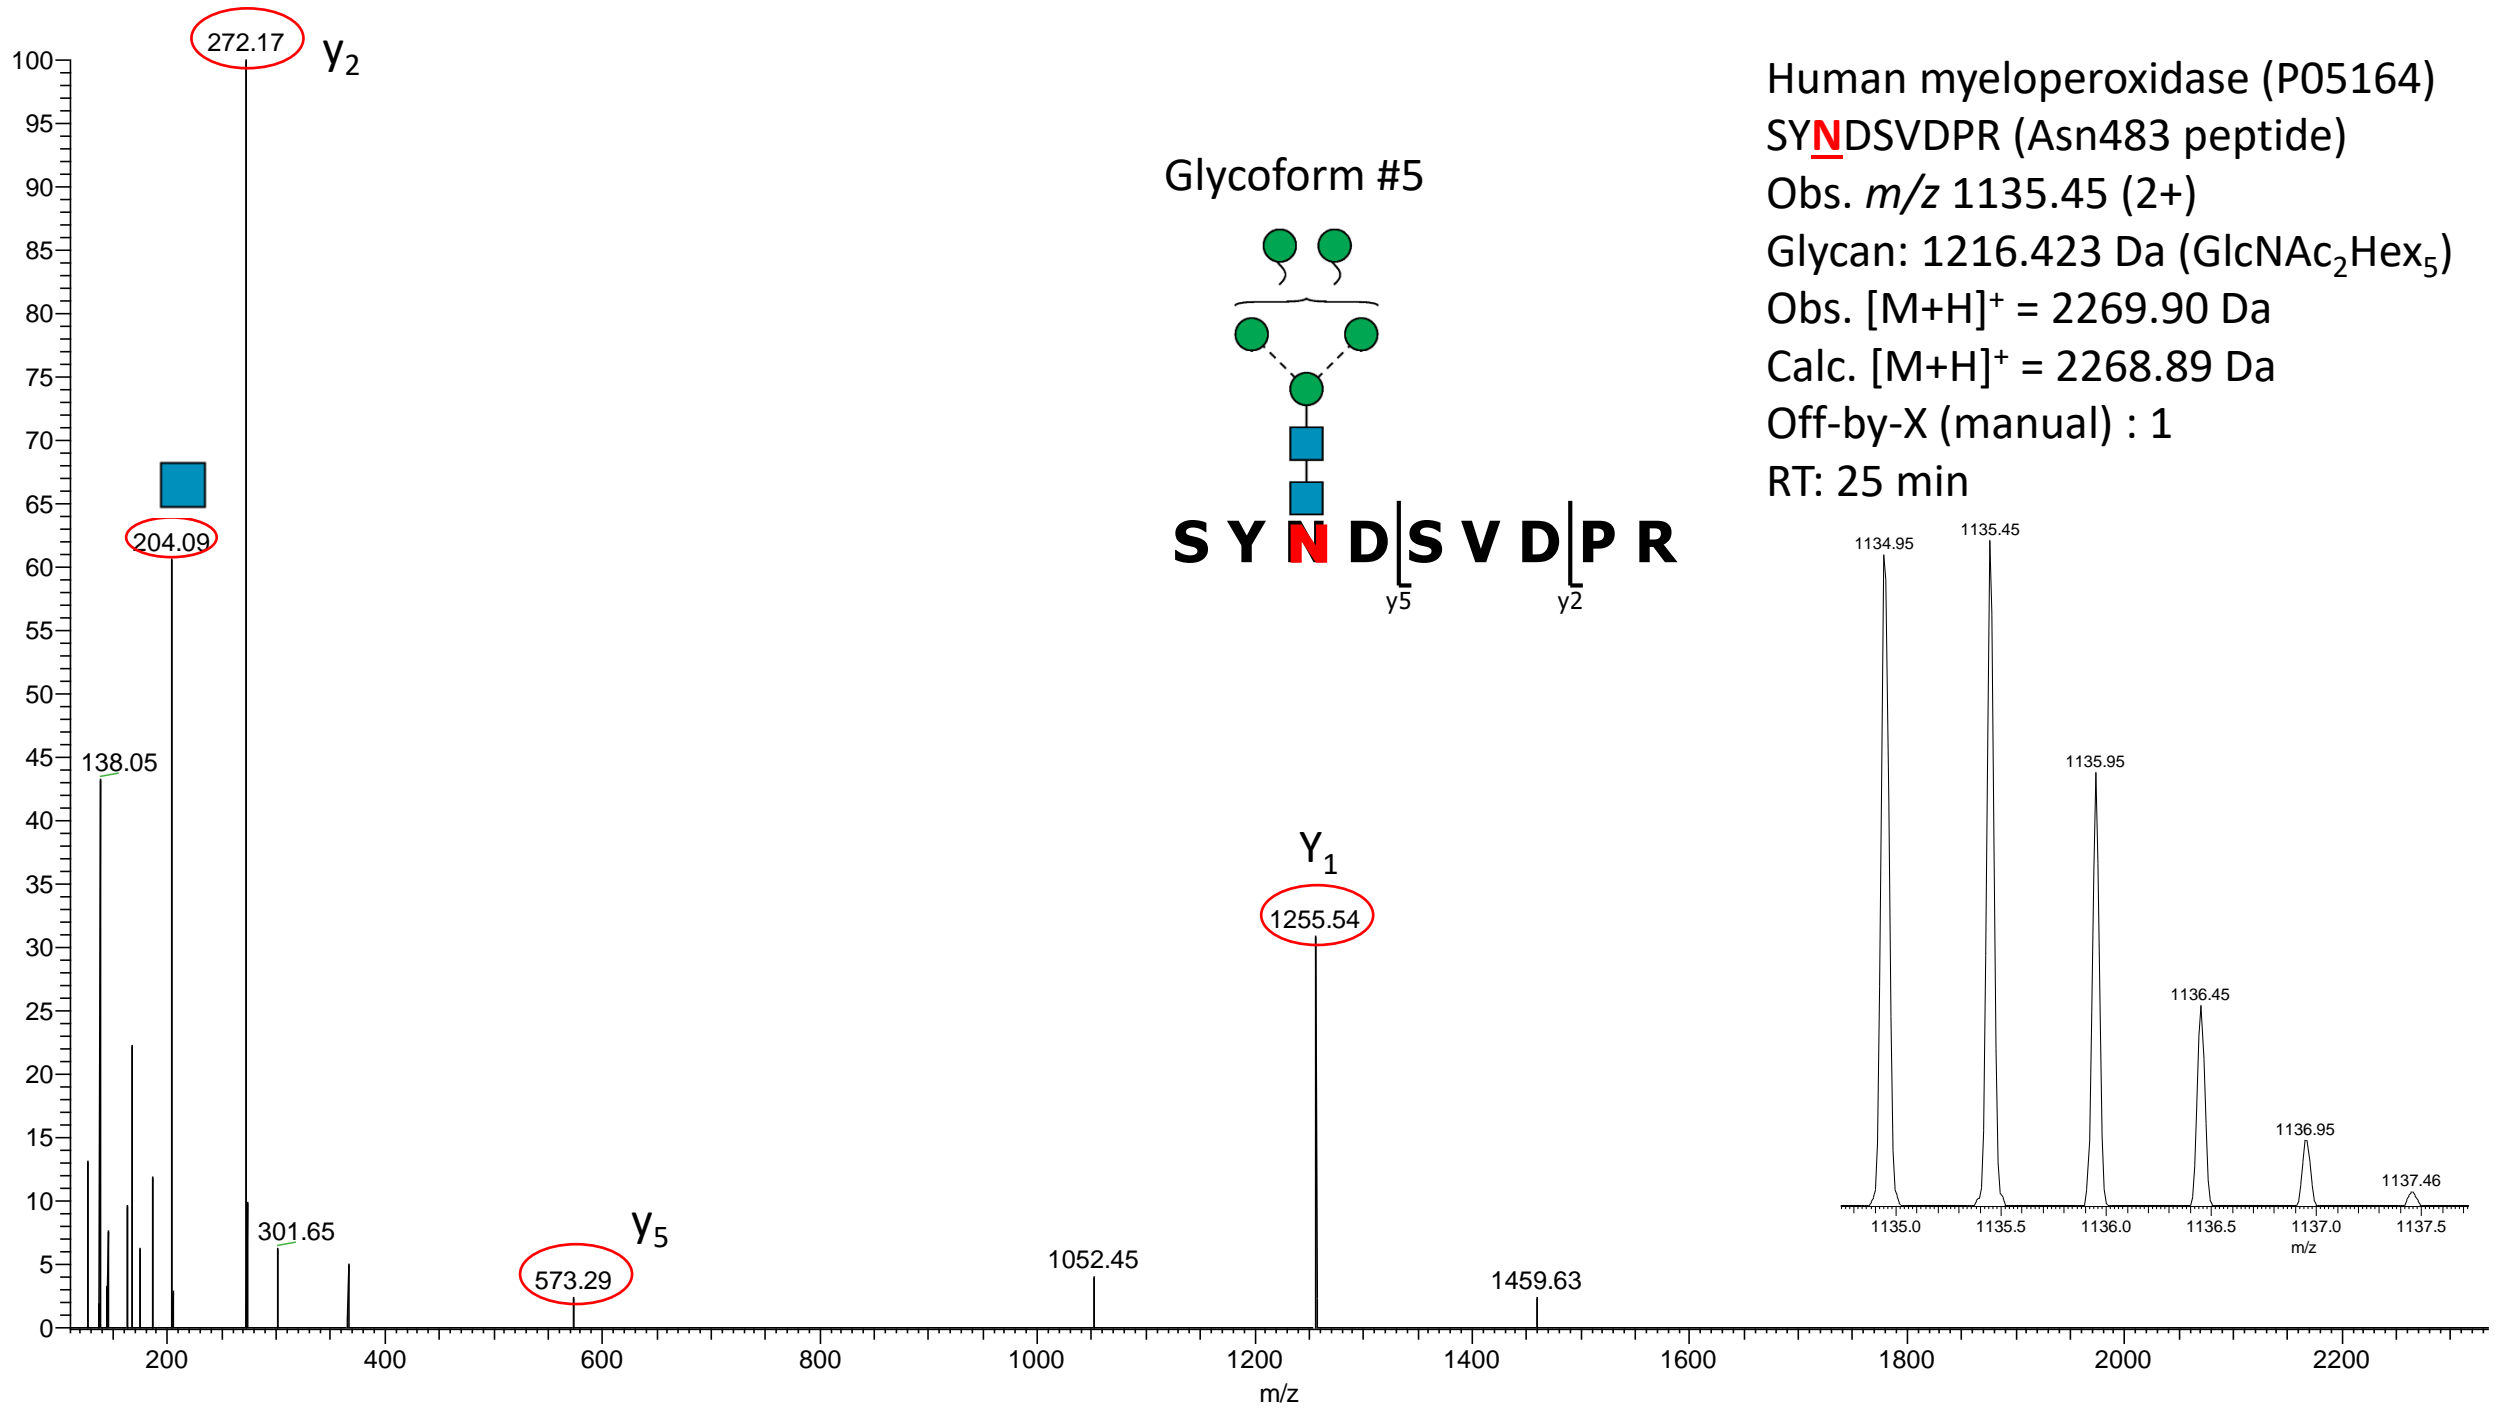

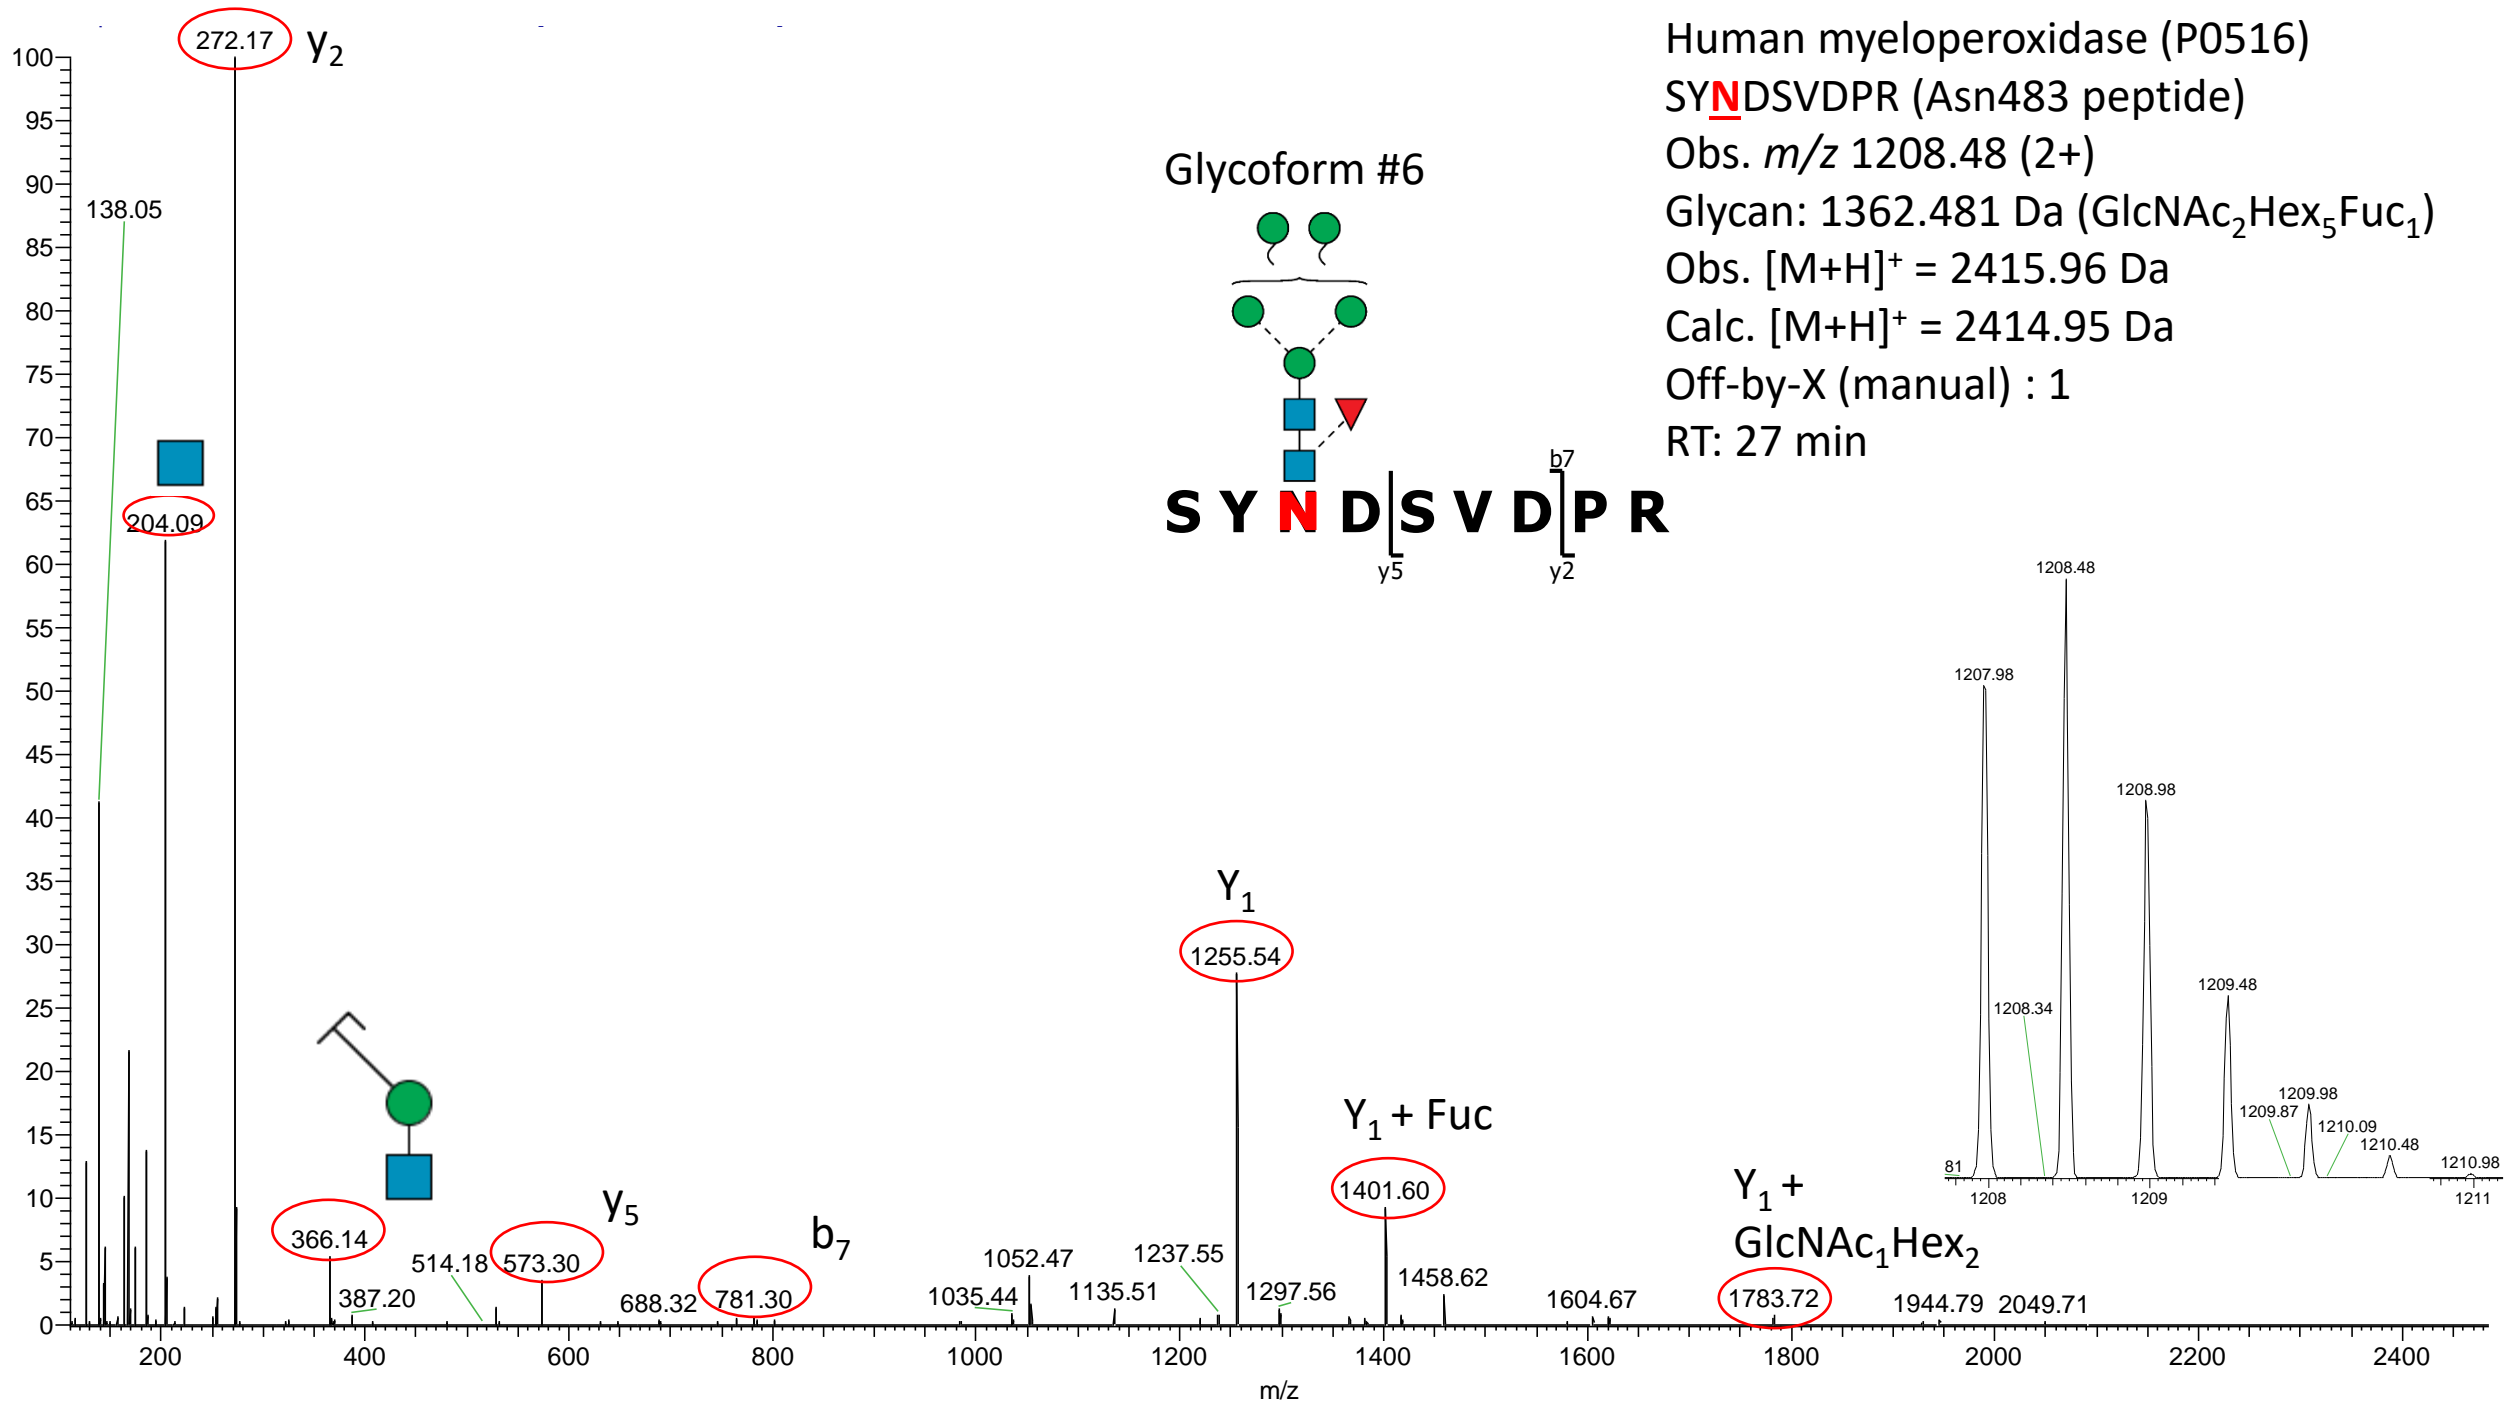

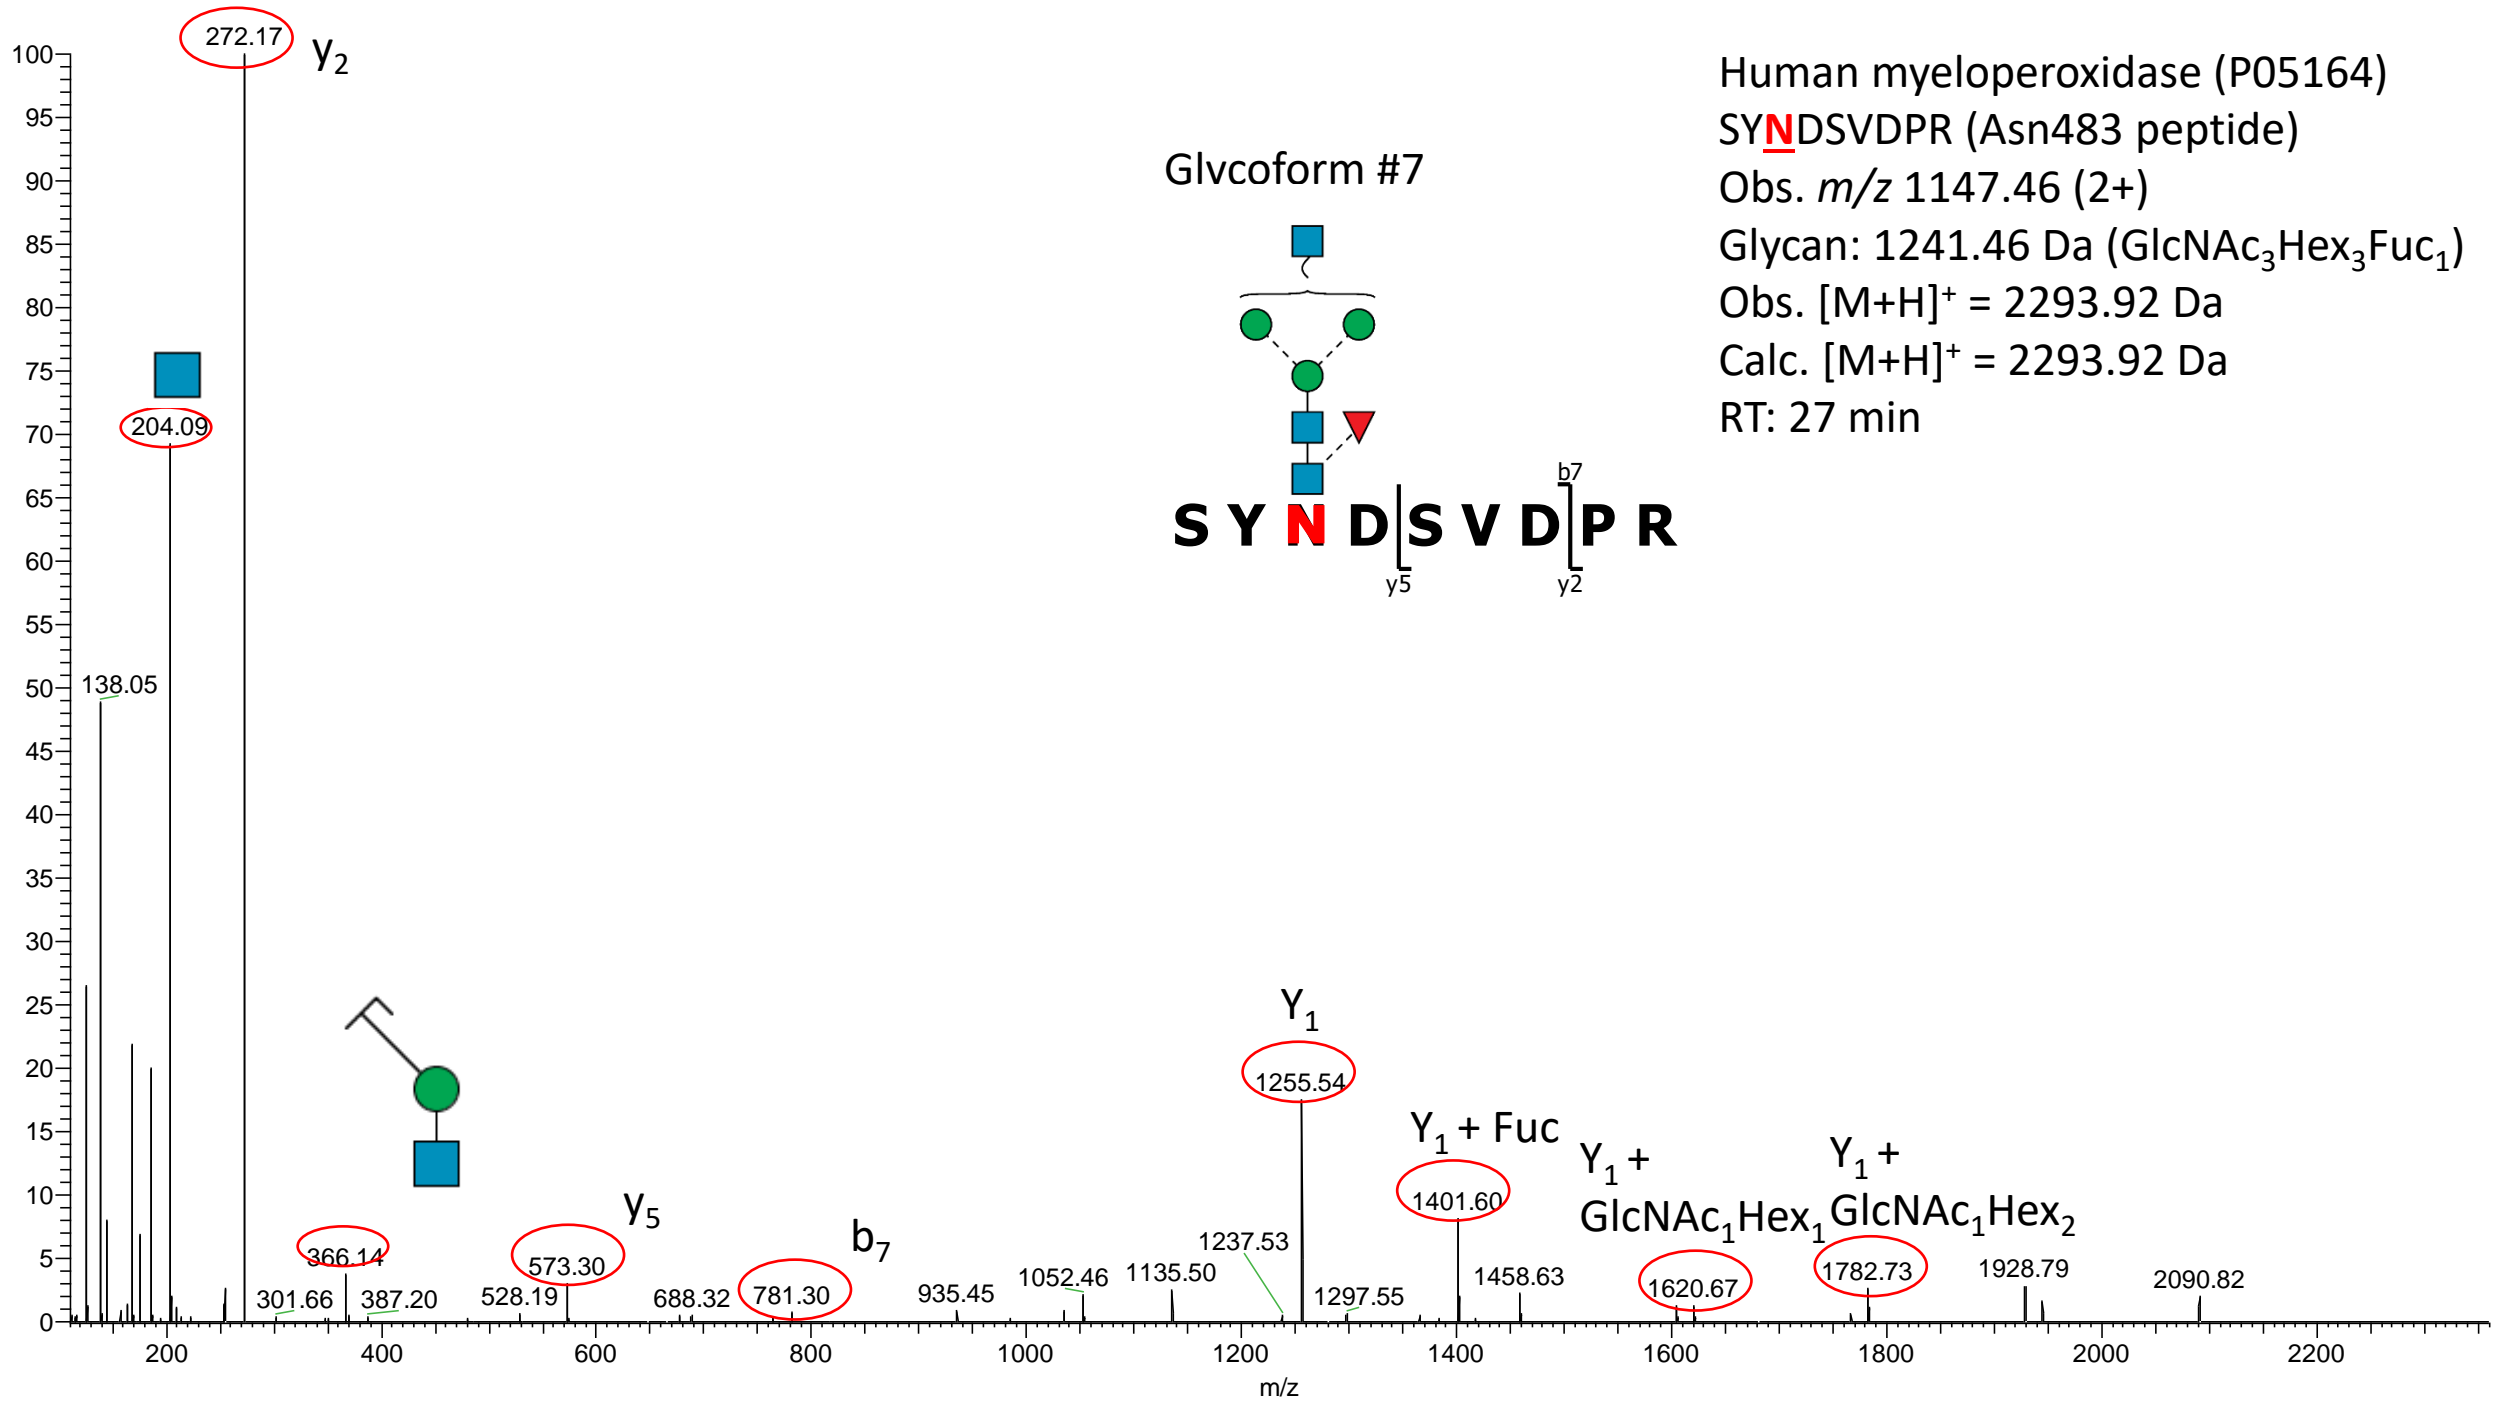



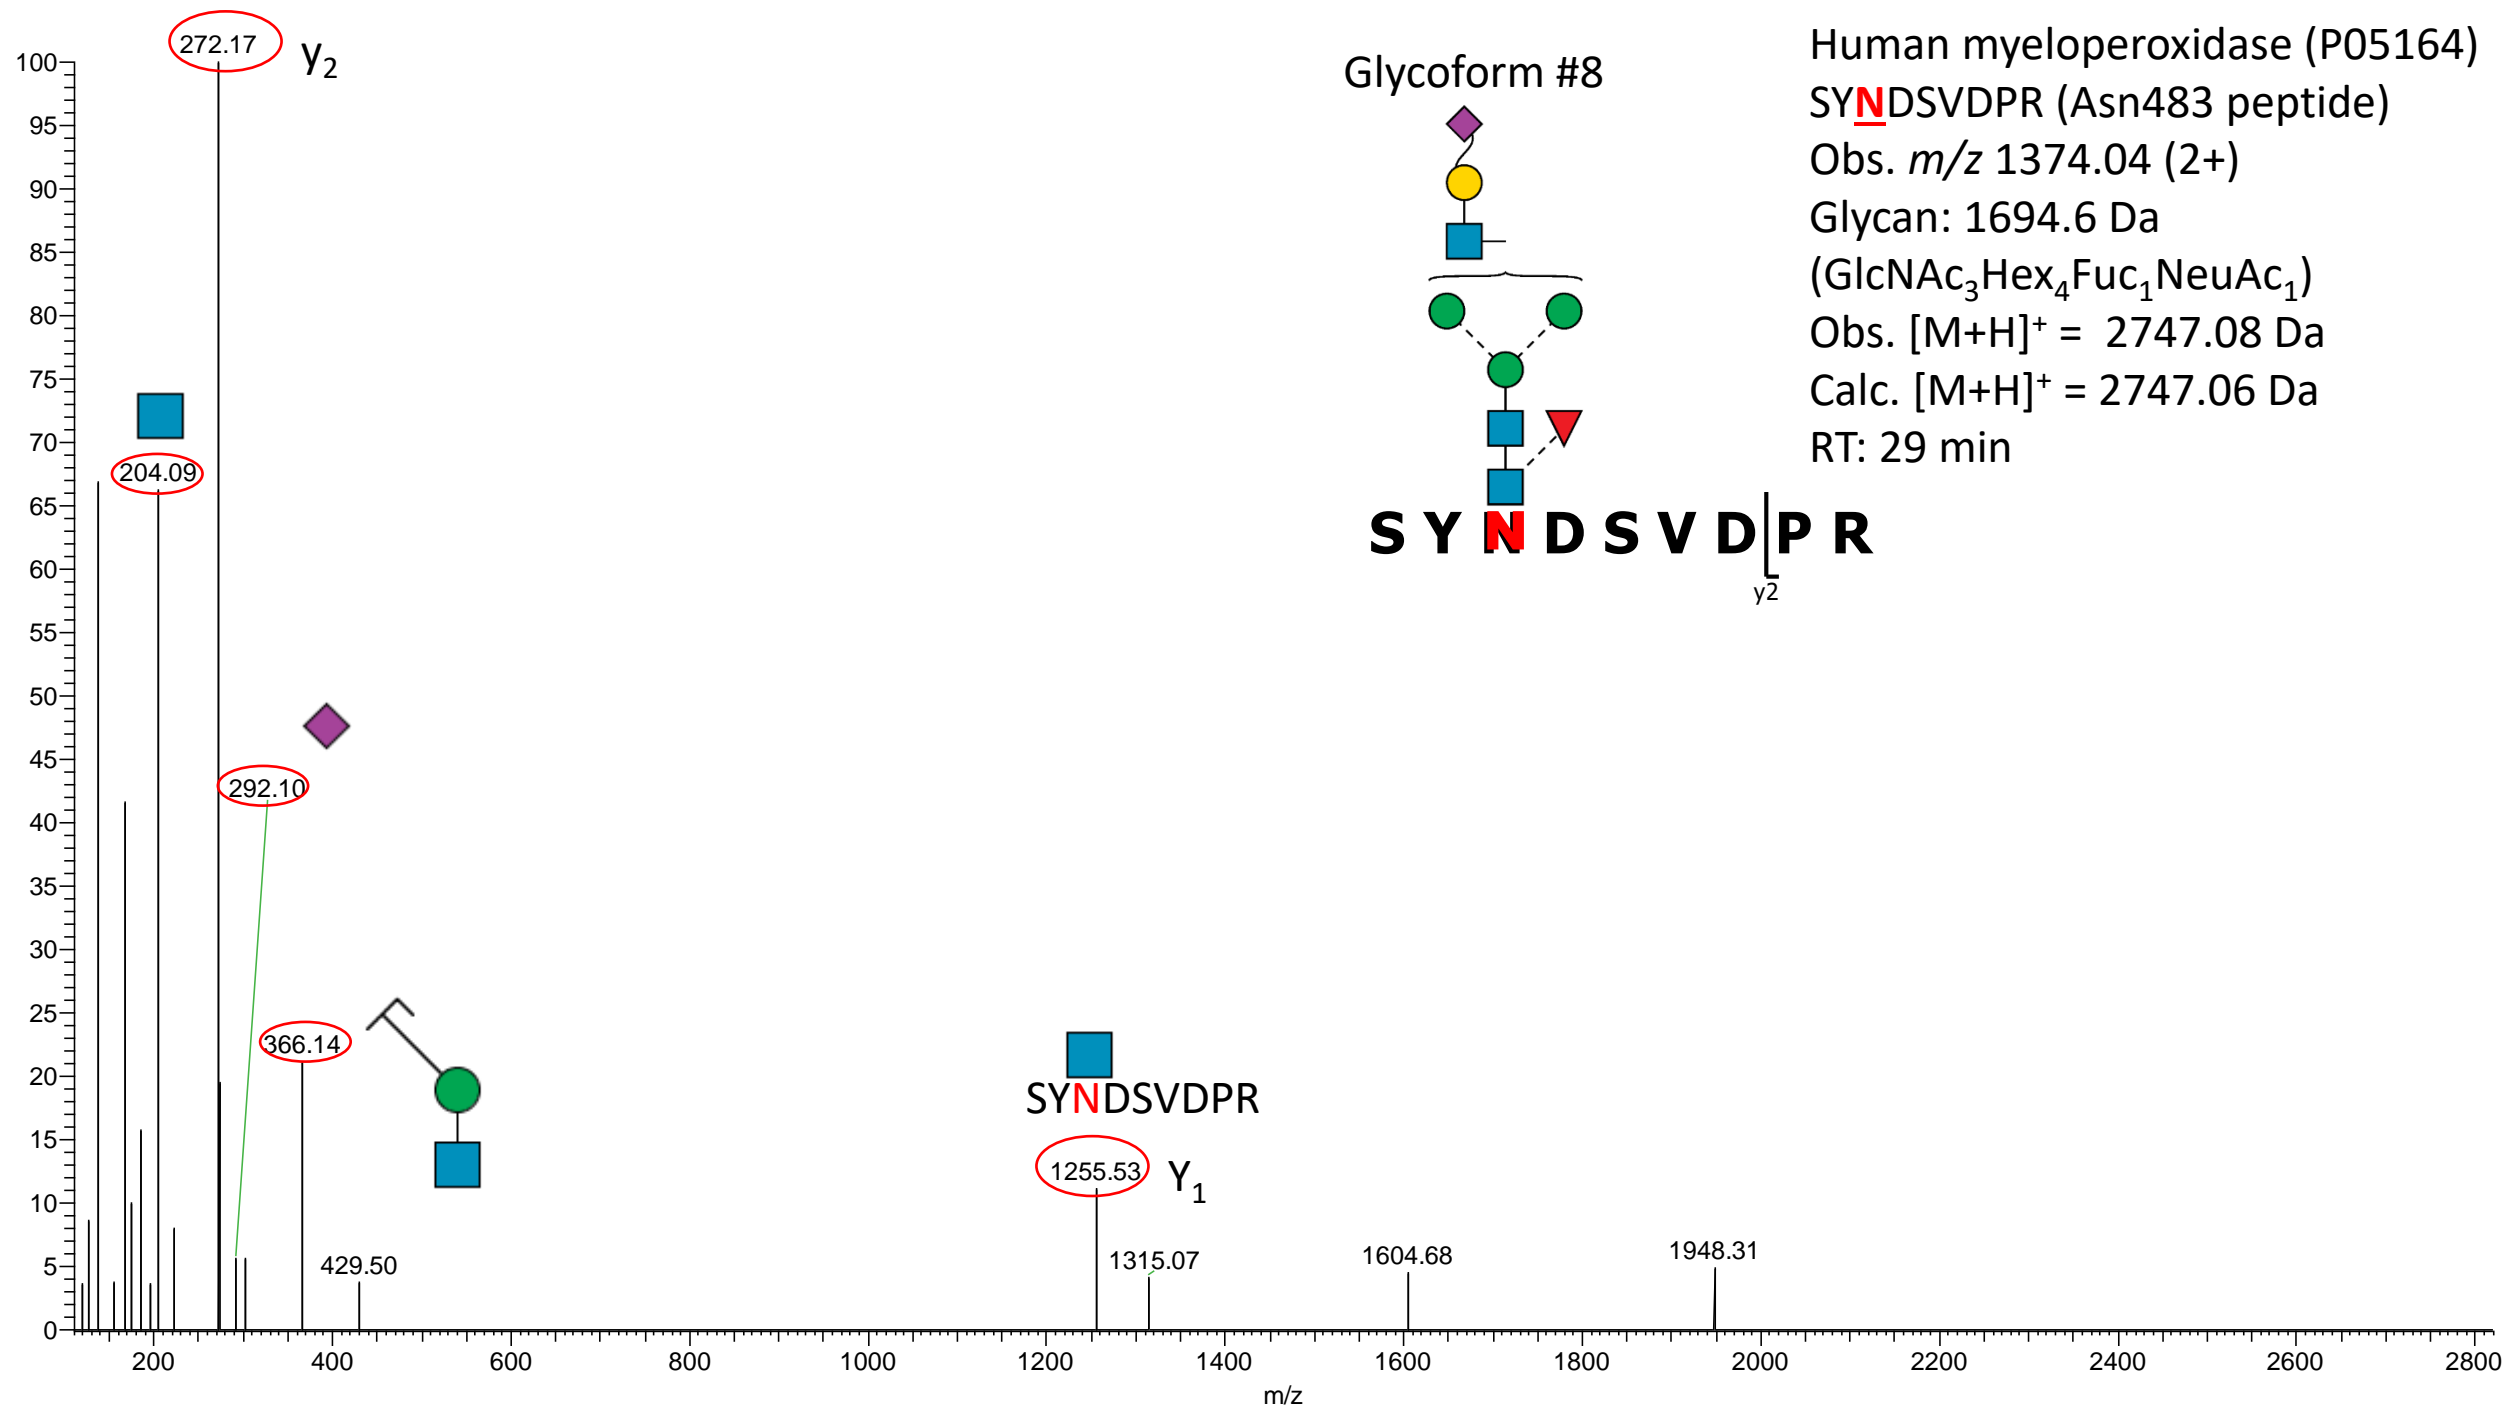

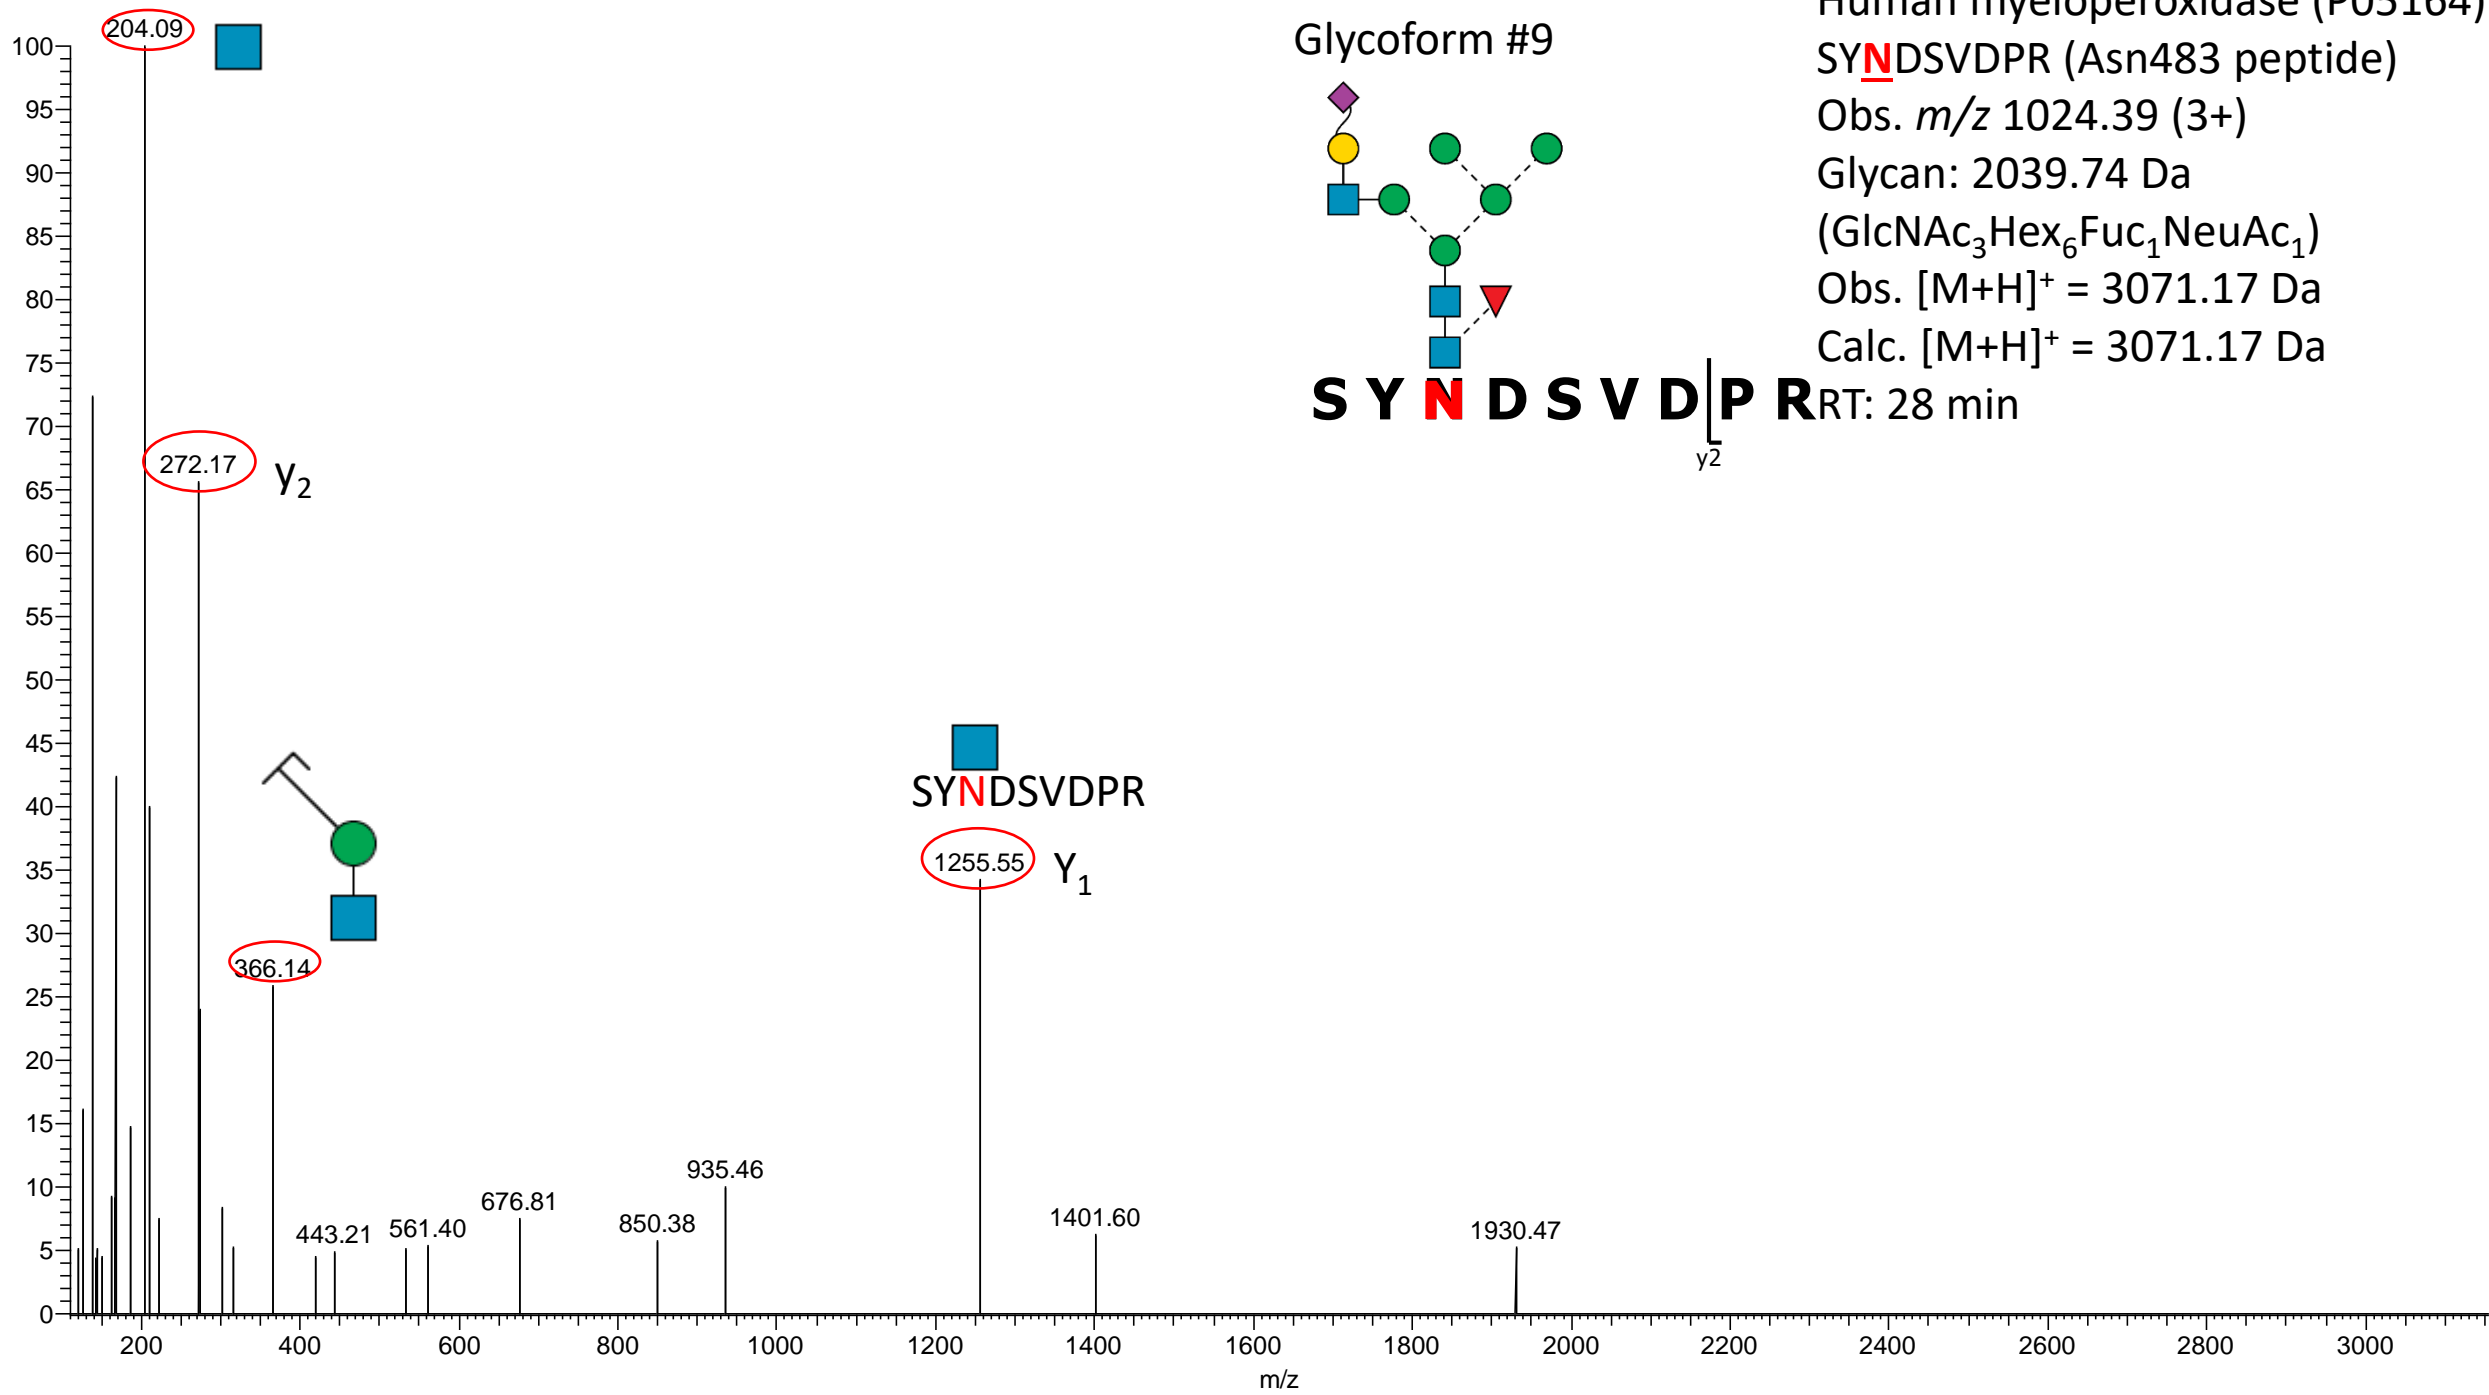

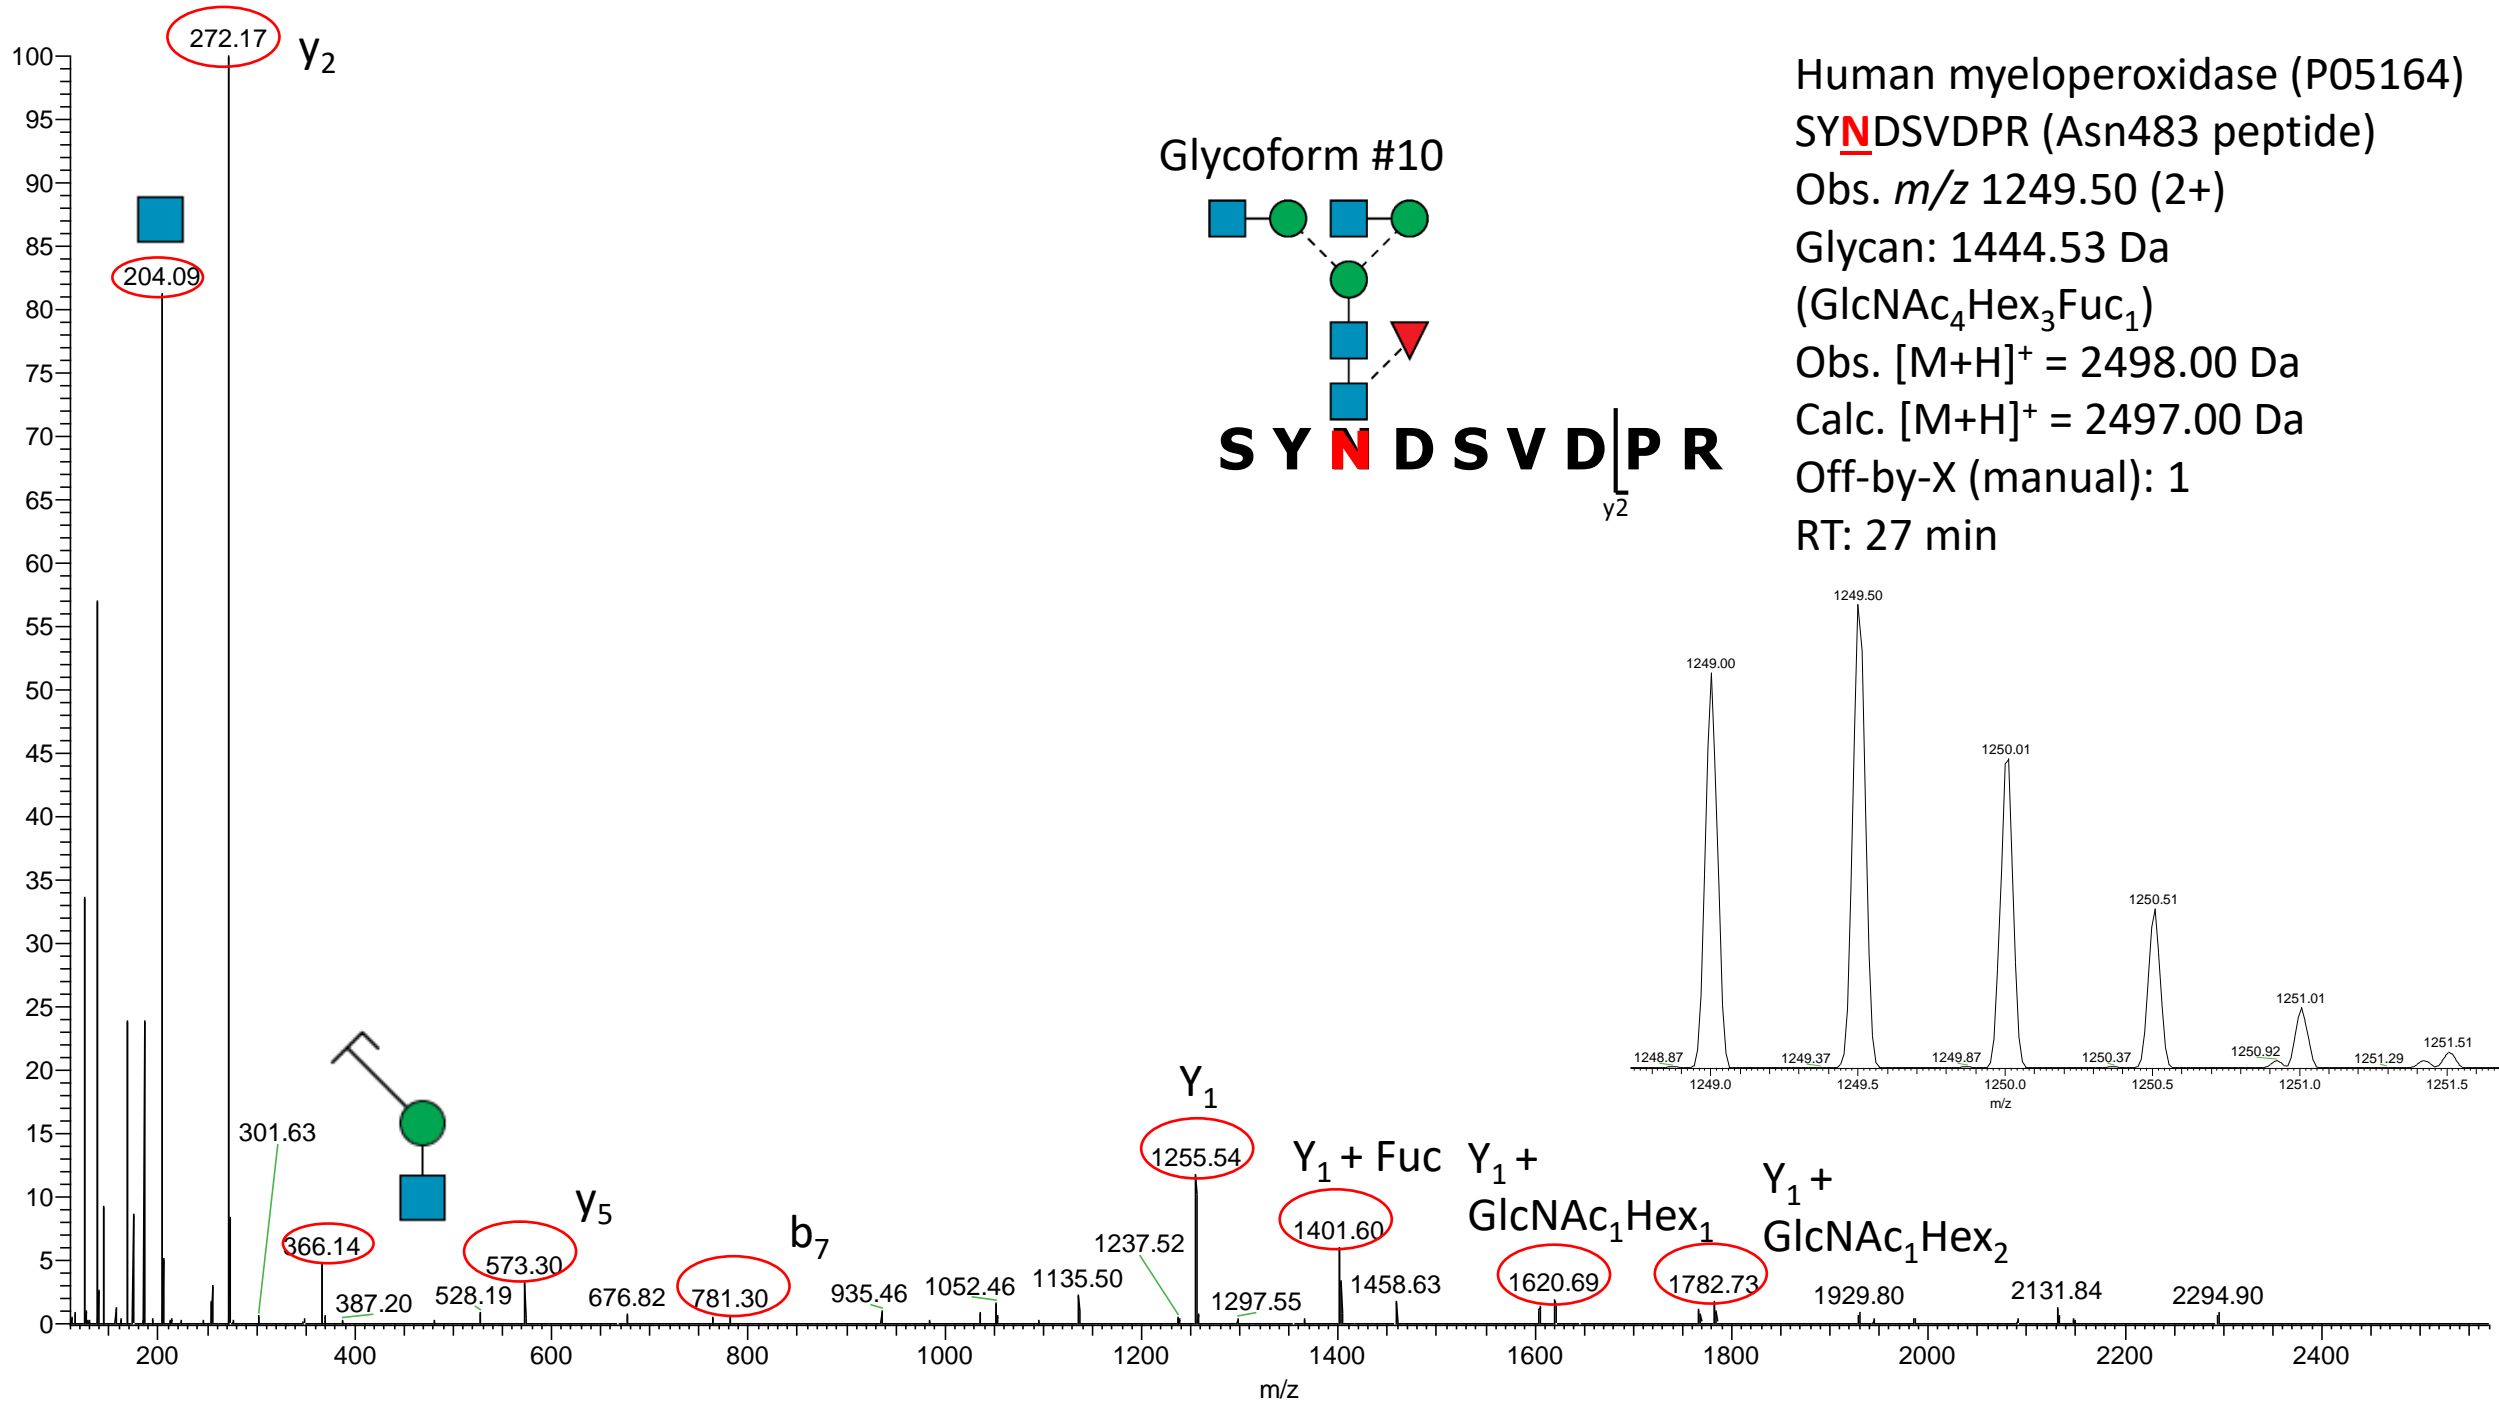

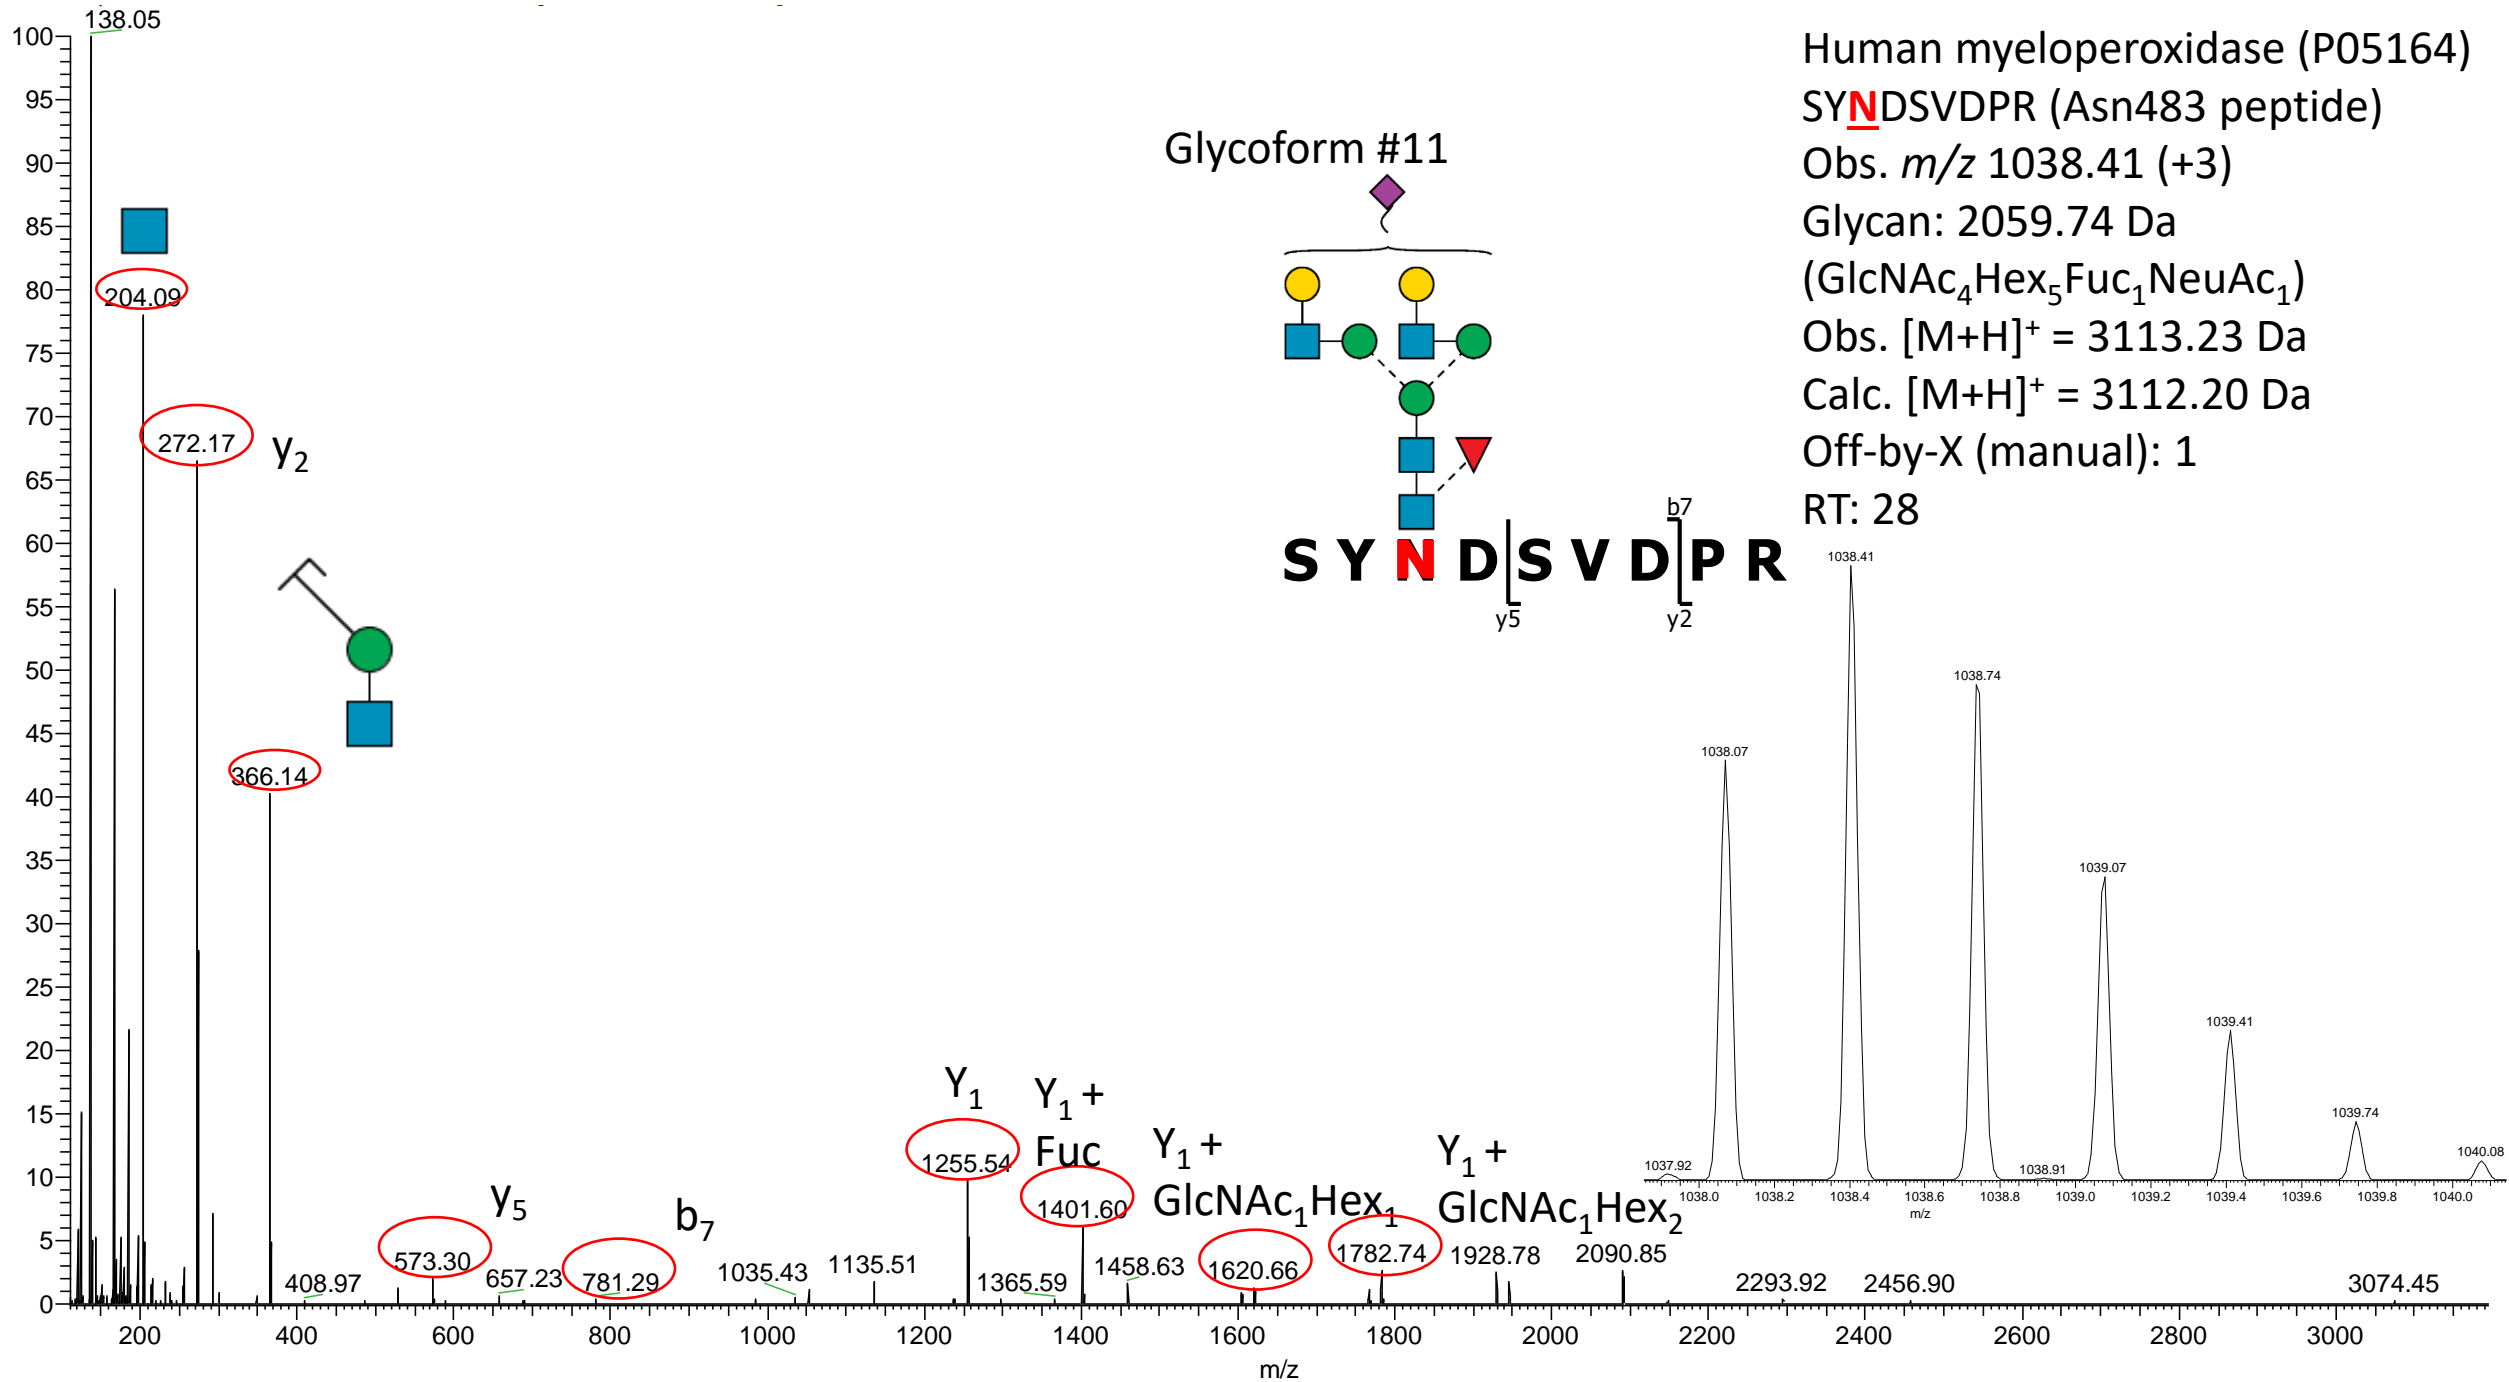

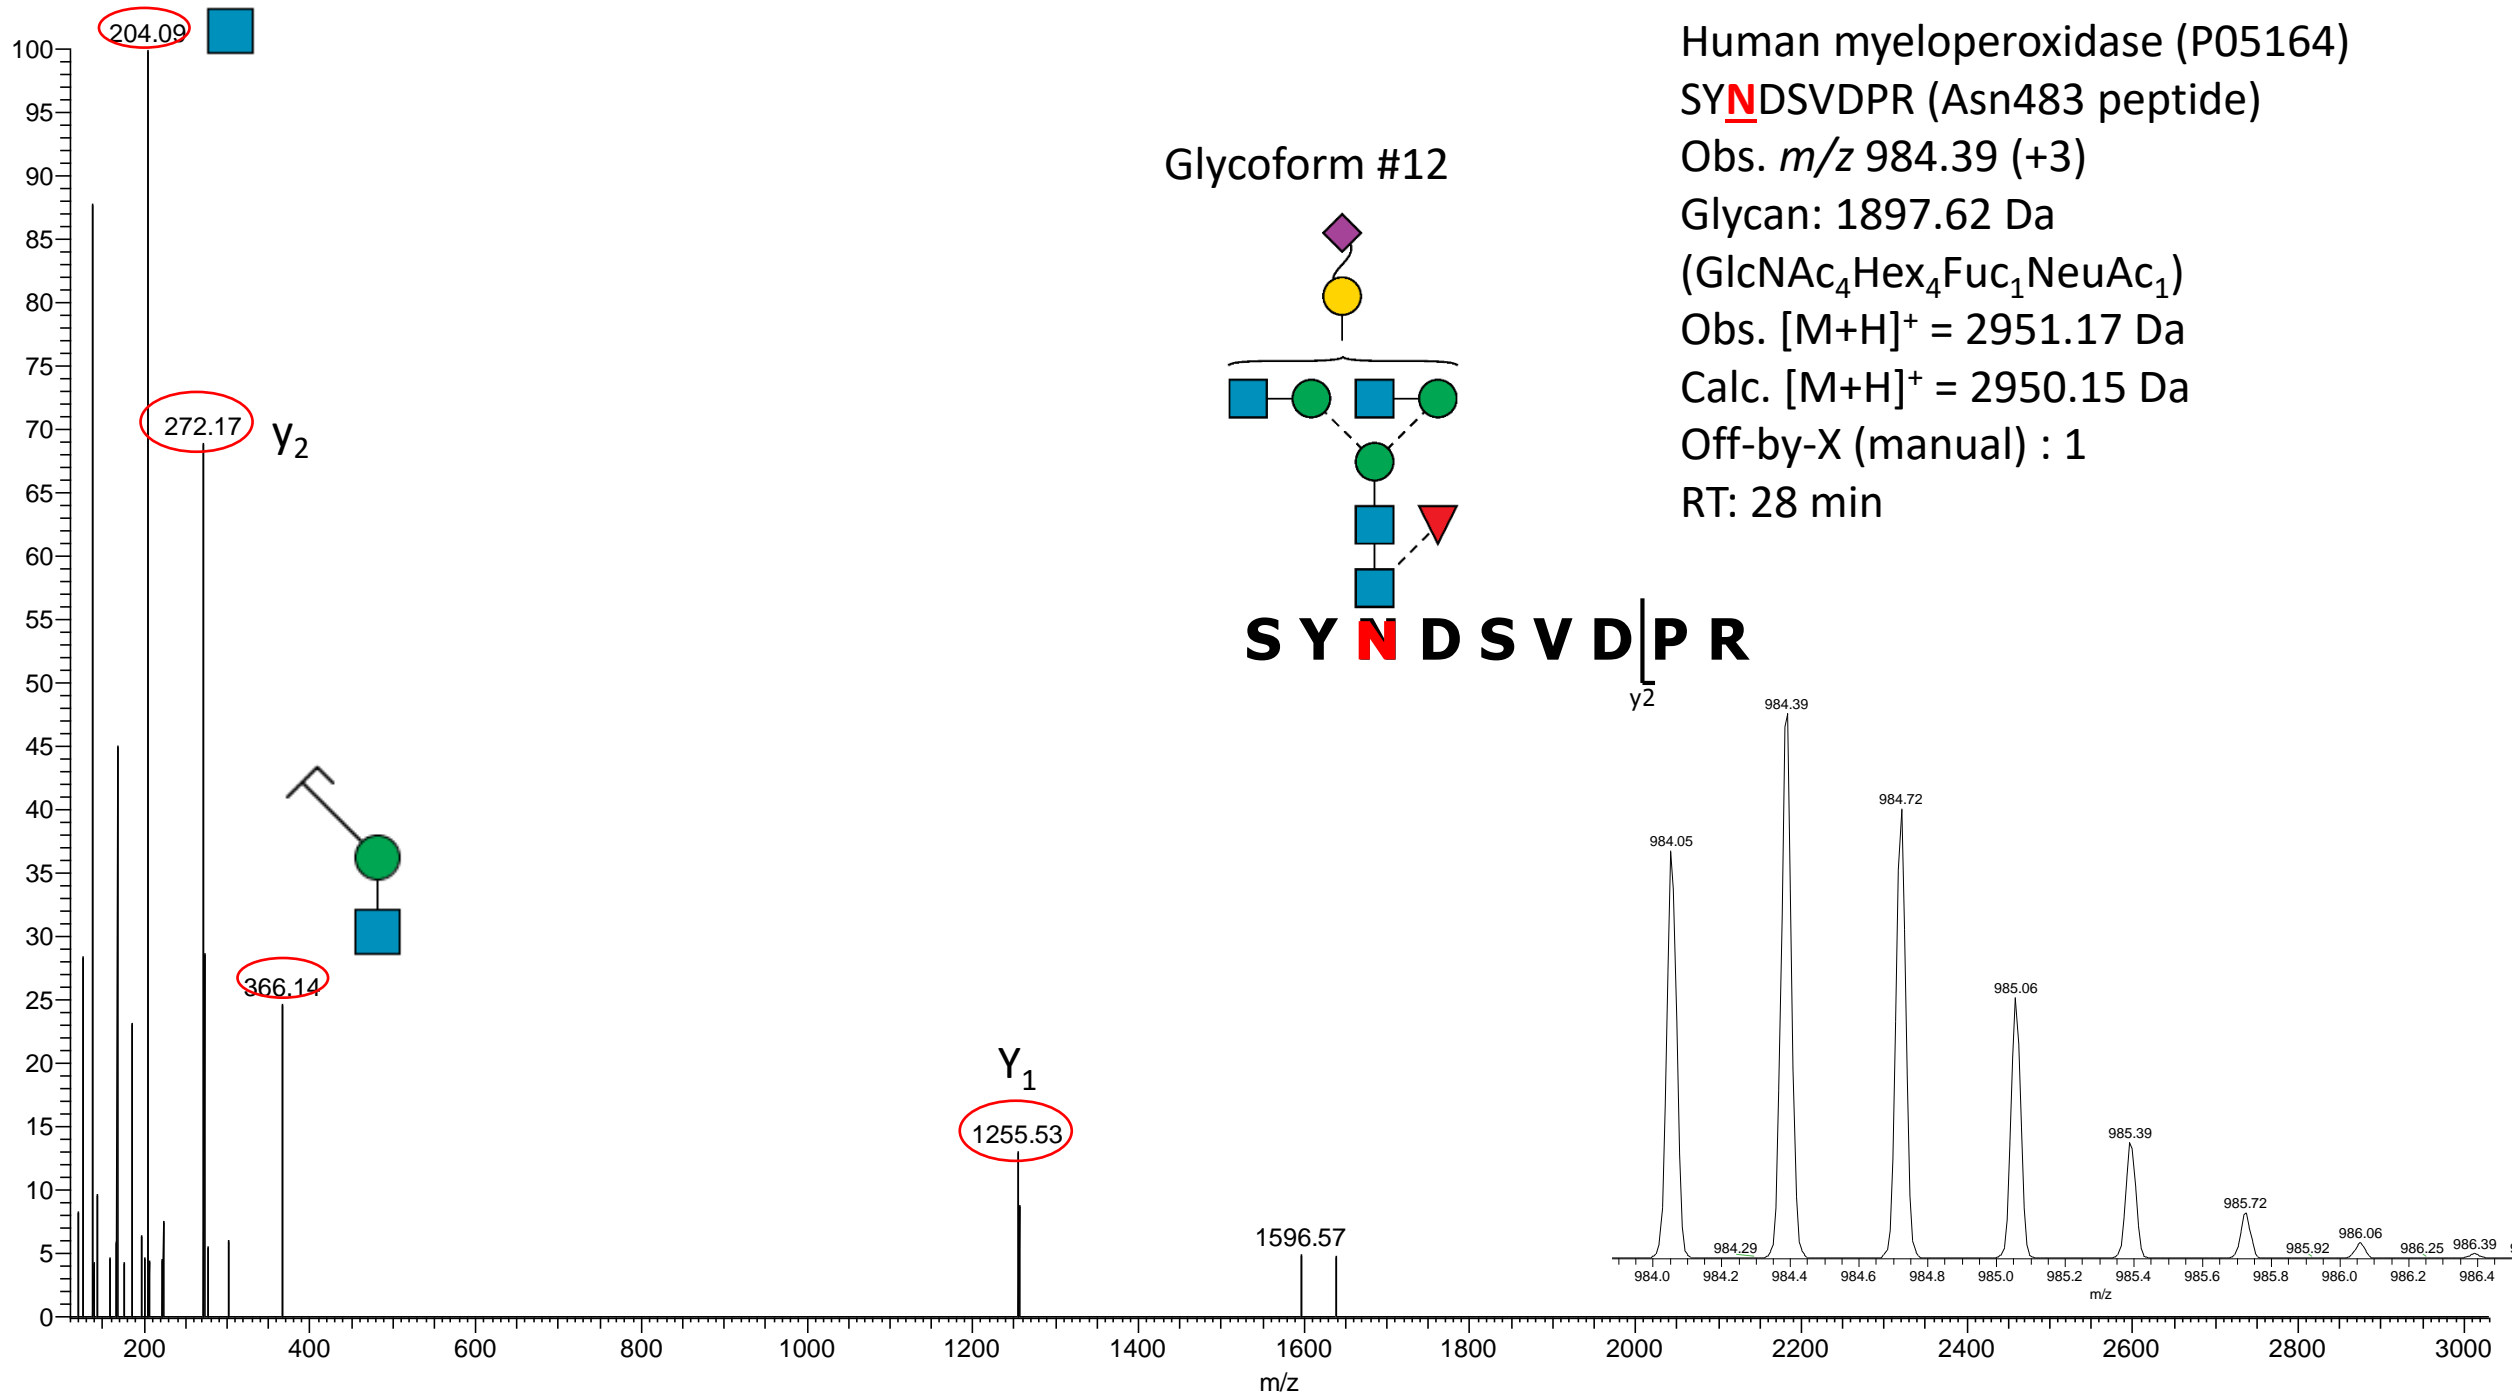

## **Supplementary Data S3E**

Manually annotated reversed phase-LC-ESI-HCD-MS/MS (+) spectra of all glycosylated and non-glycosylated peptides containing Asn729 identified from the analysis of unenriched peptide mixtures of nMPO.

Human myeloperoxidase (P05164)  
 DFVNCSTLPALNLSWR (Asn729 peptide)  
 Obs.  $m/z$  982.99 (2+)  
 Obs.  $[M+H]^+ = 1964.98$  Da  
 Calc.  $[M+H]^+ = 1963.95$  Da  
 Off-by-X (manual) : 1  
 RT: 93 min

Non-glycosylated peptide

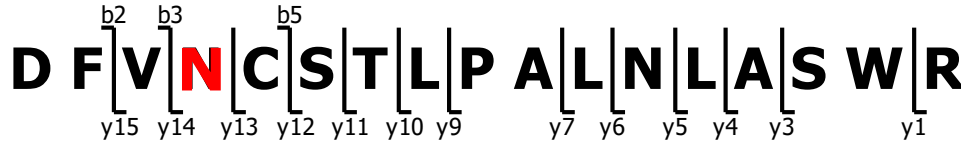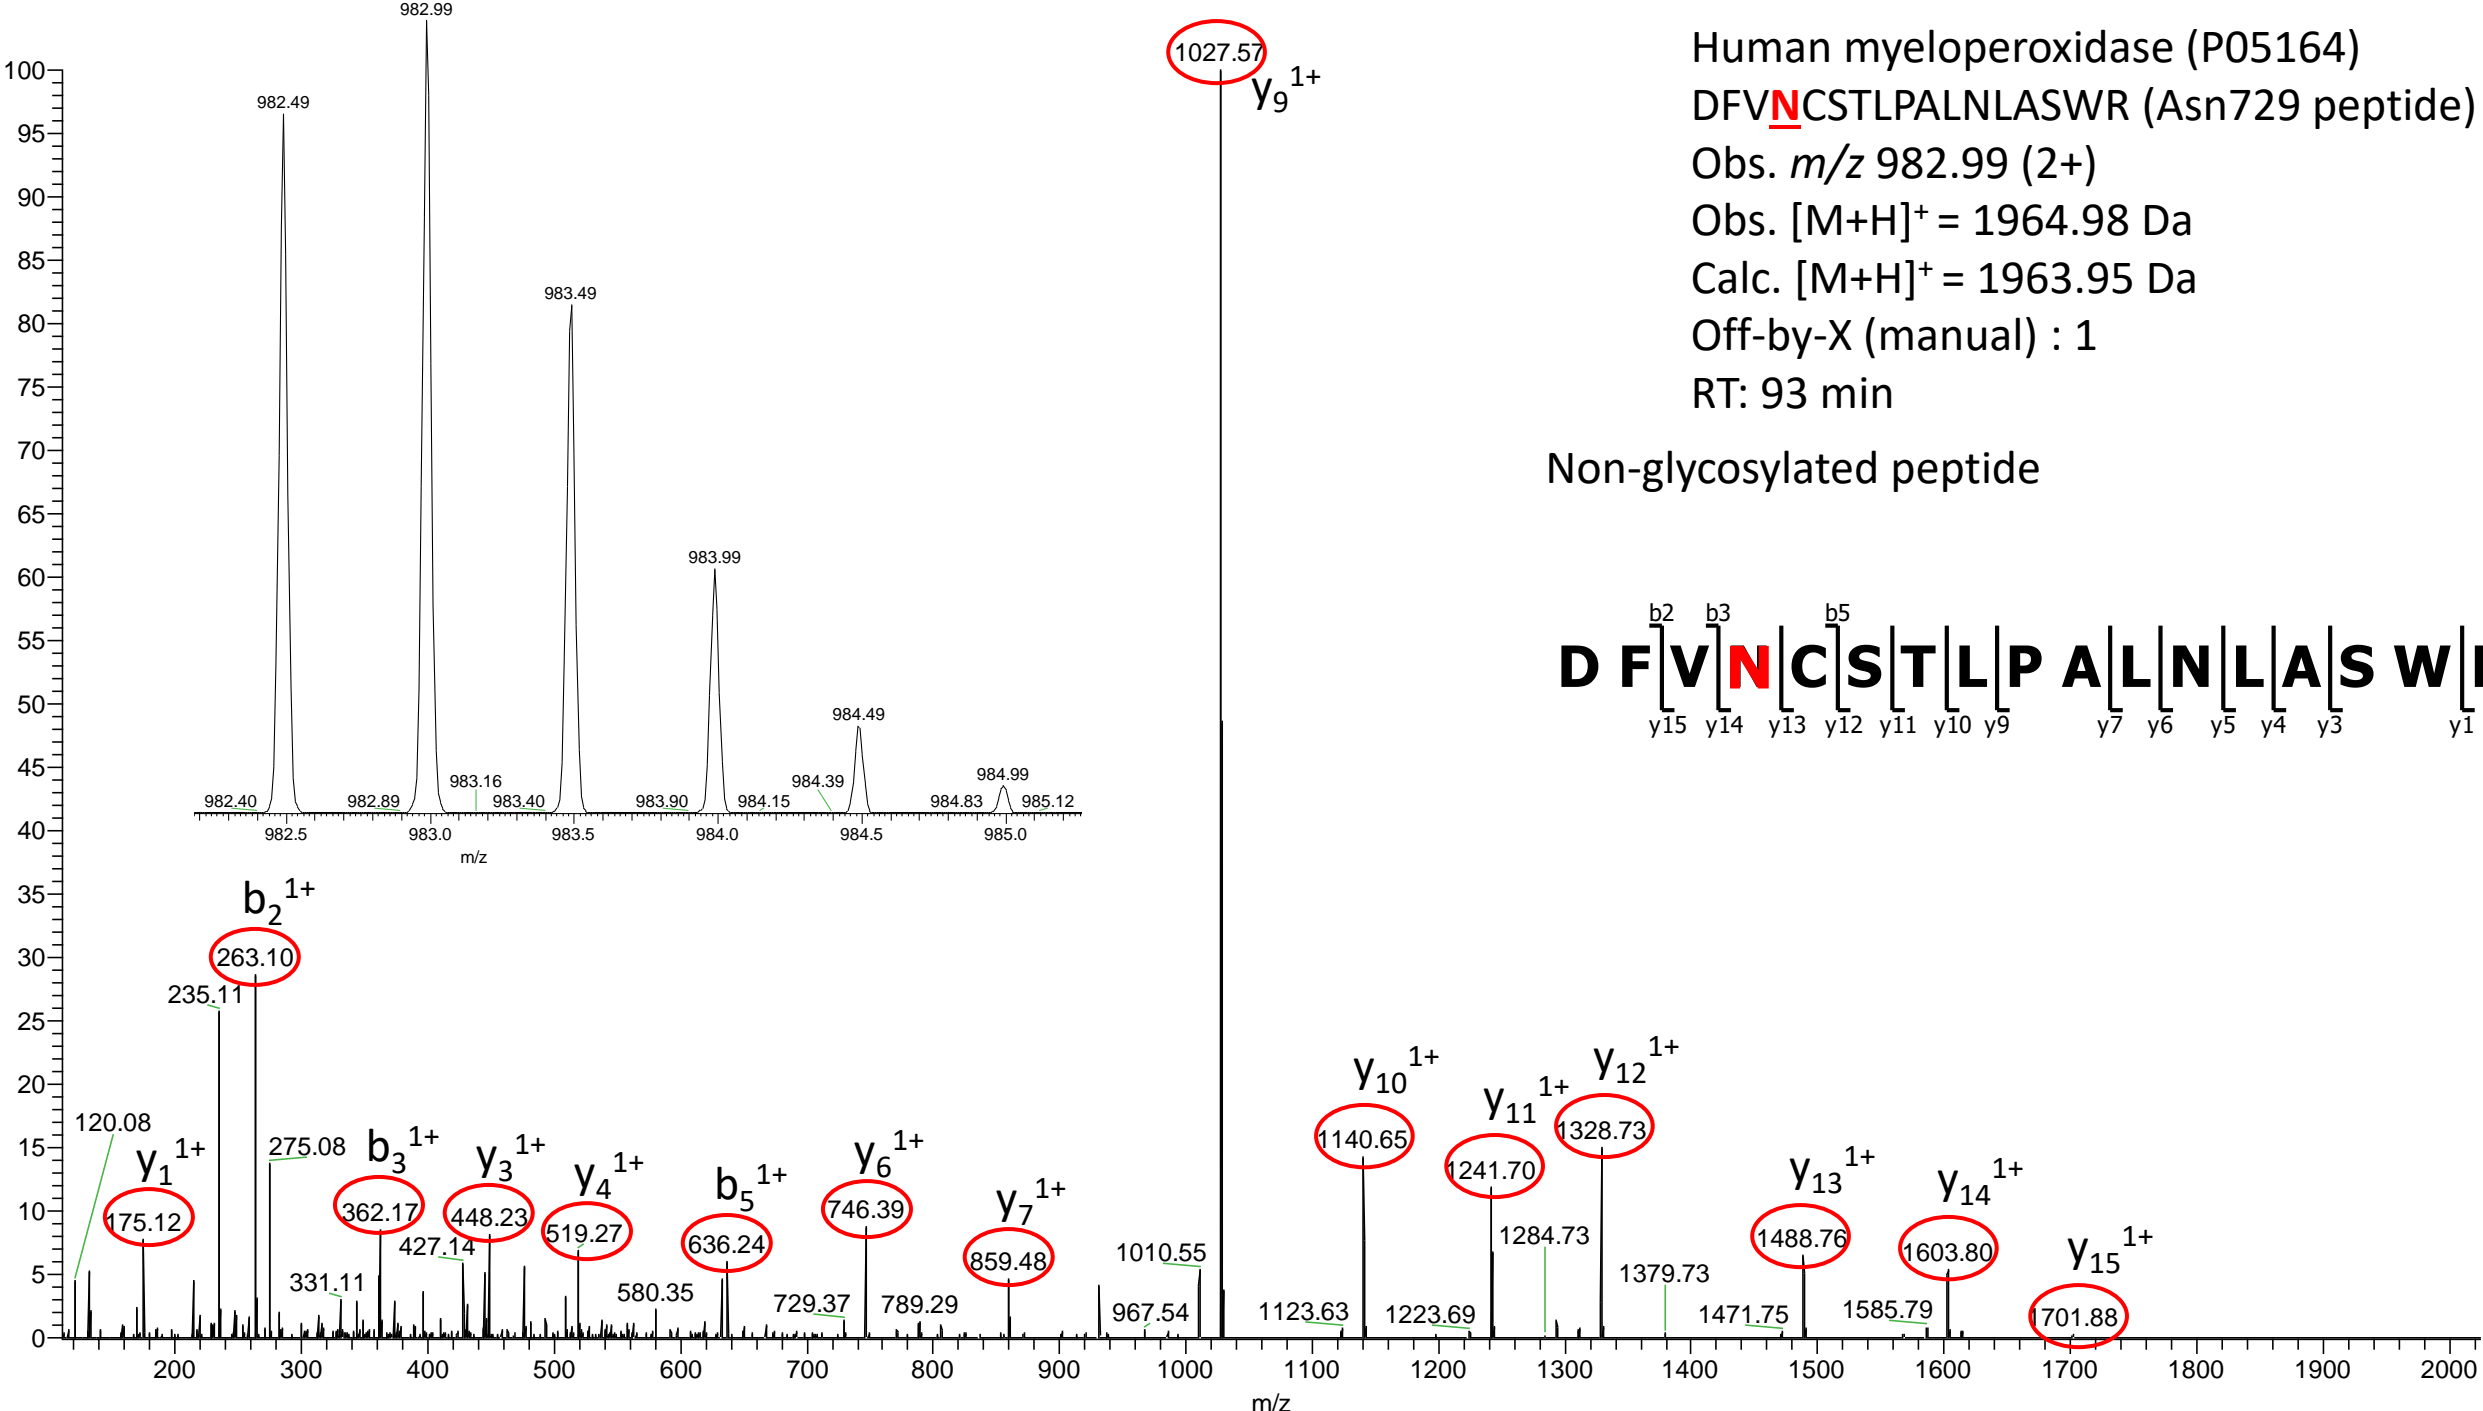

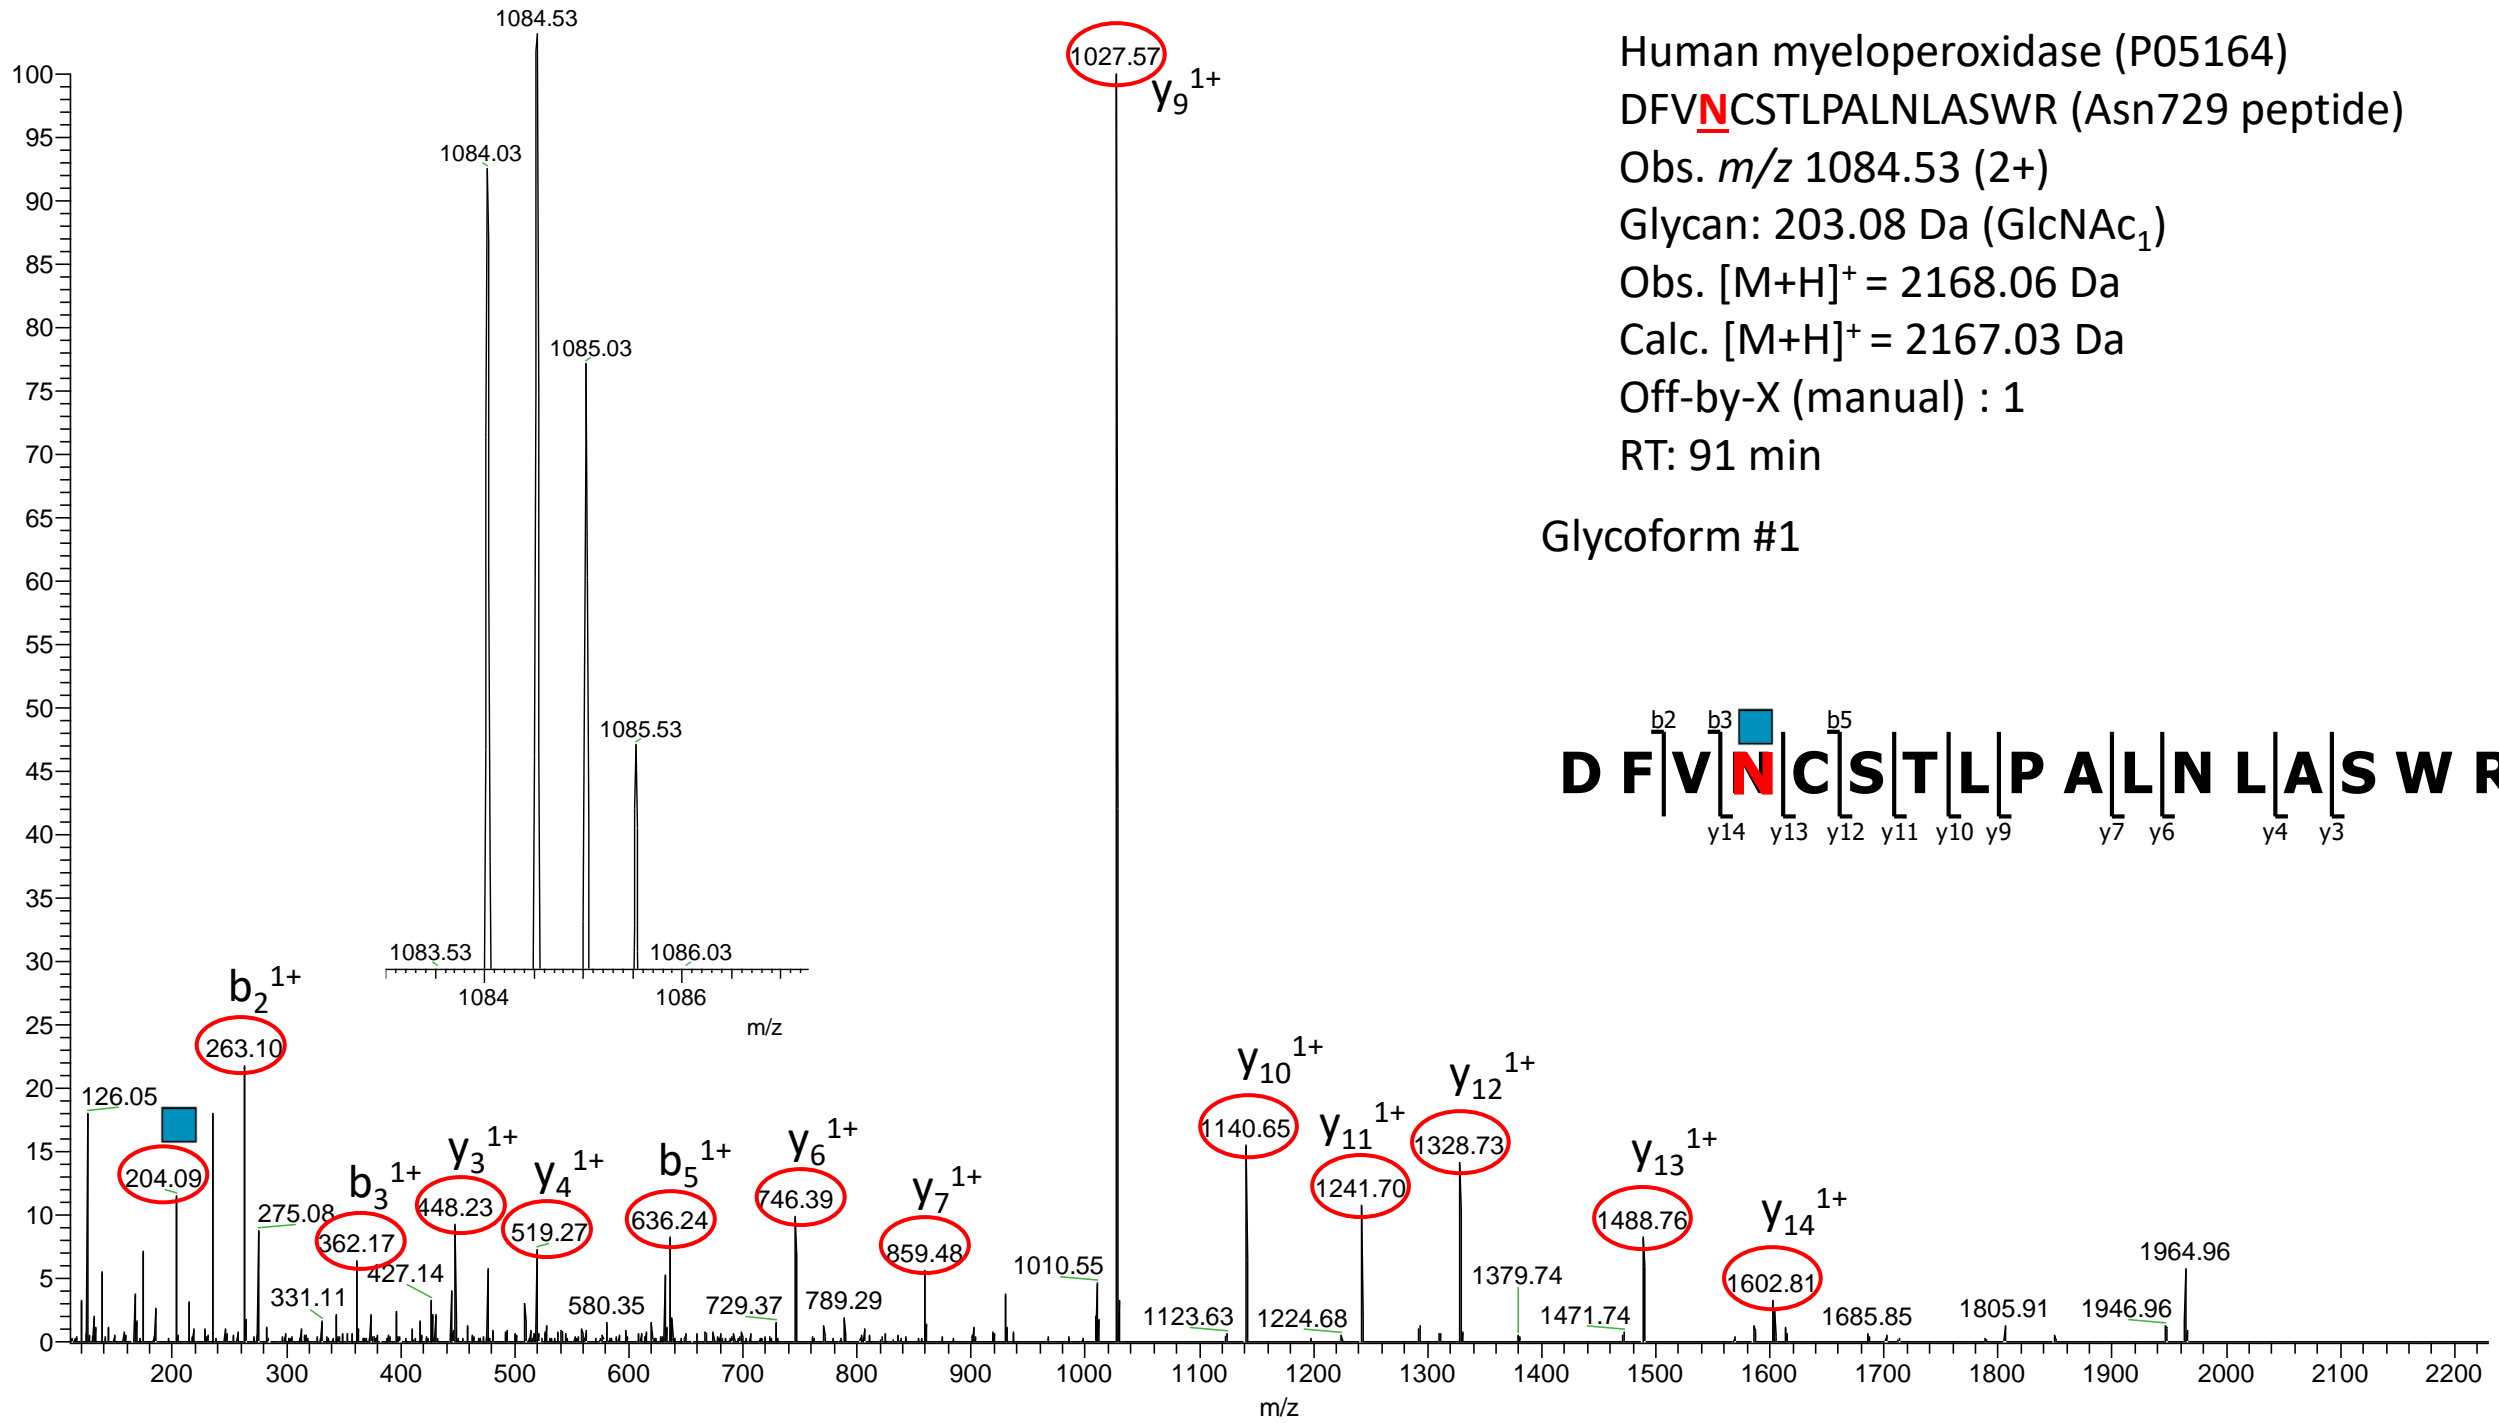



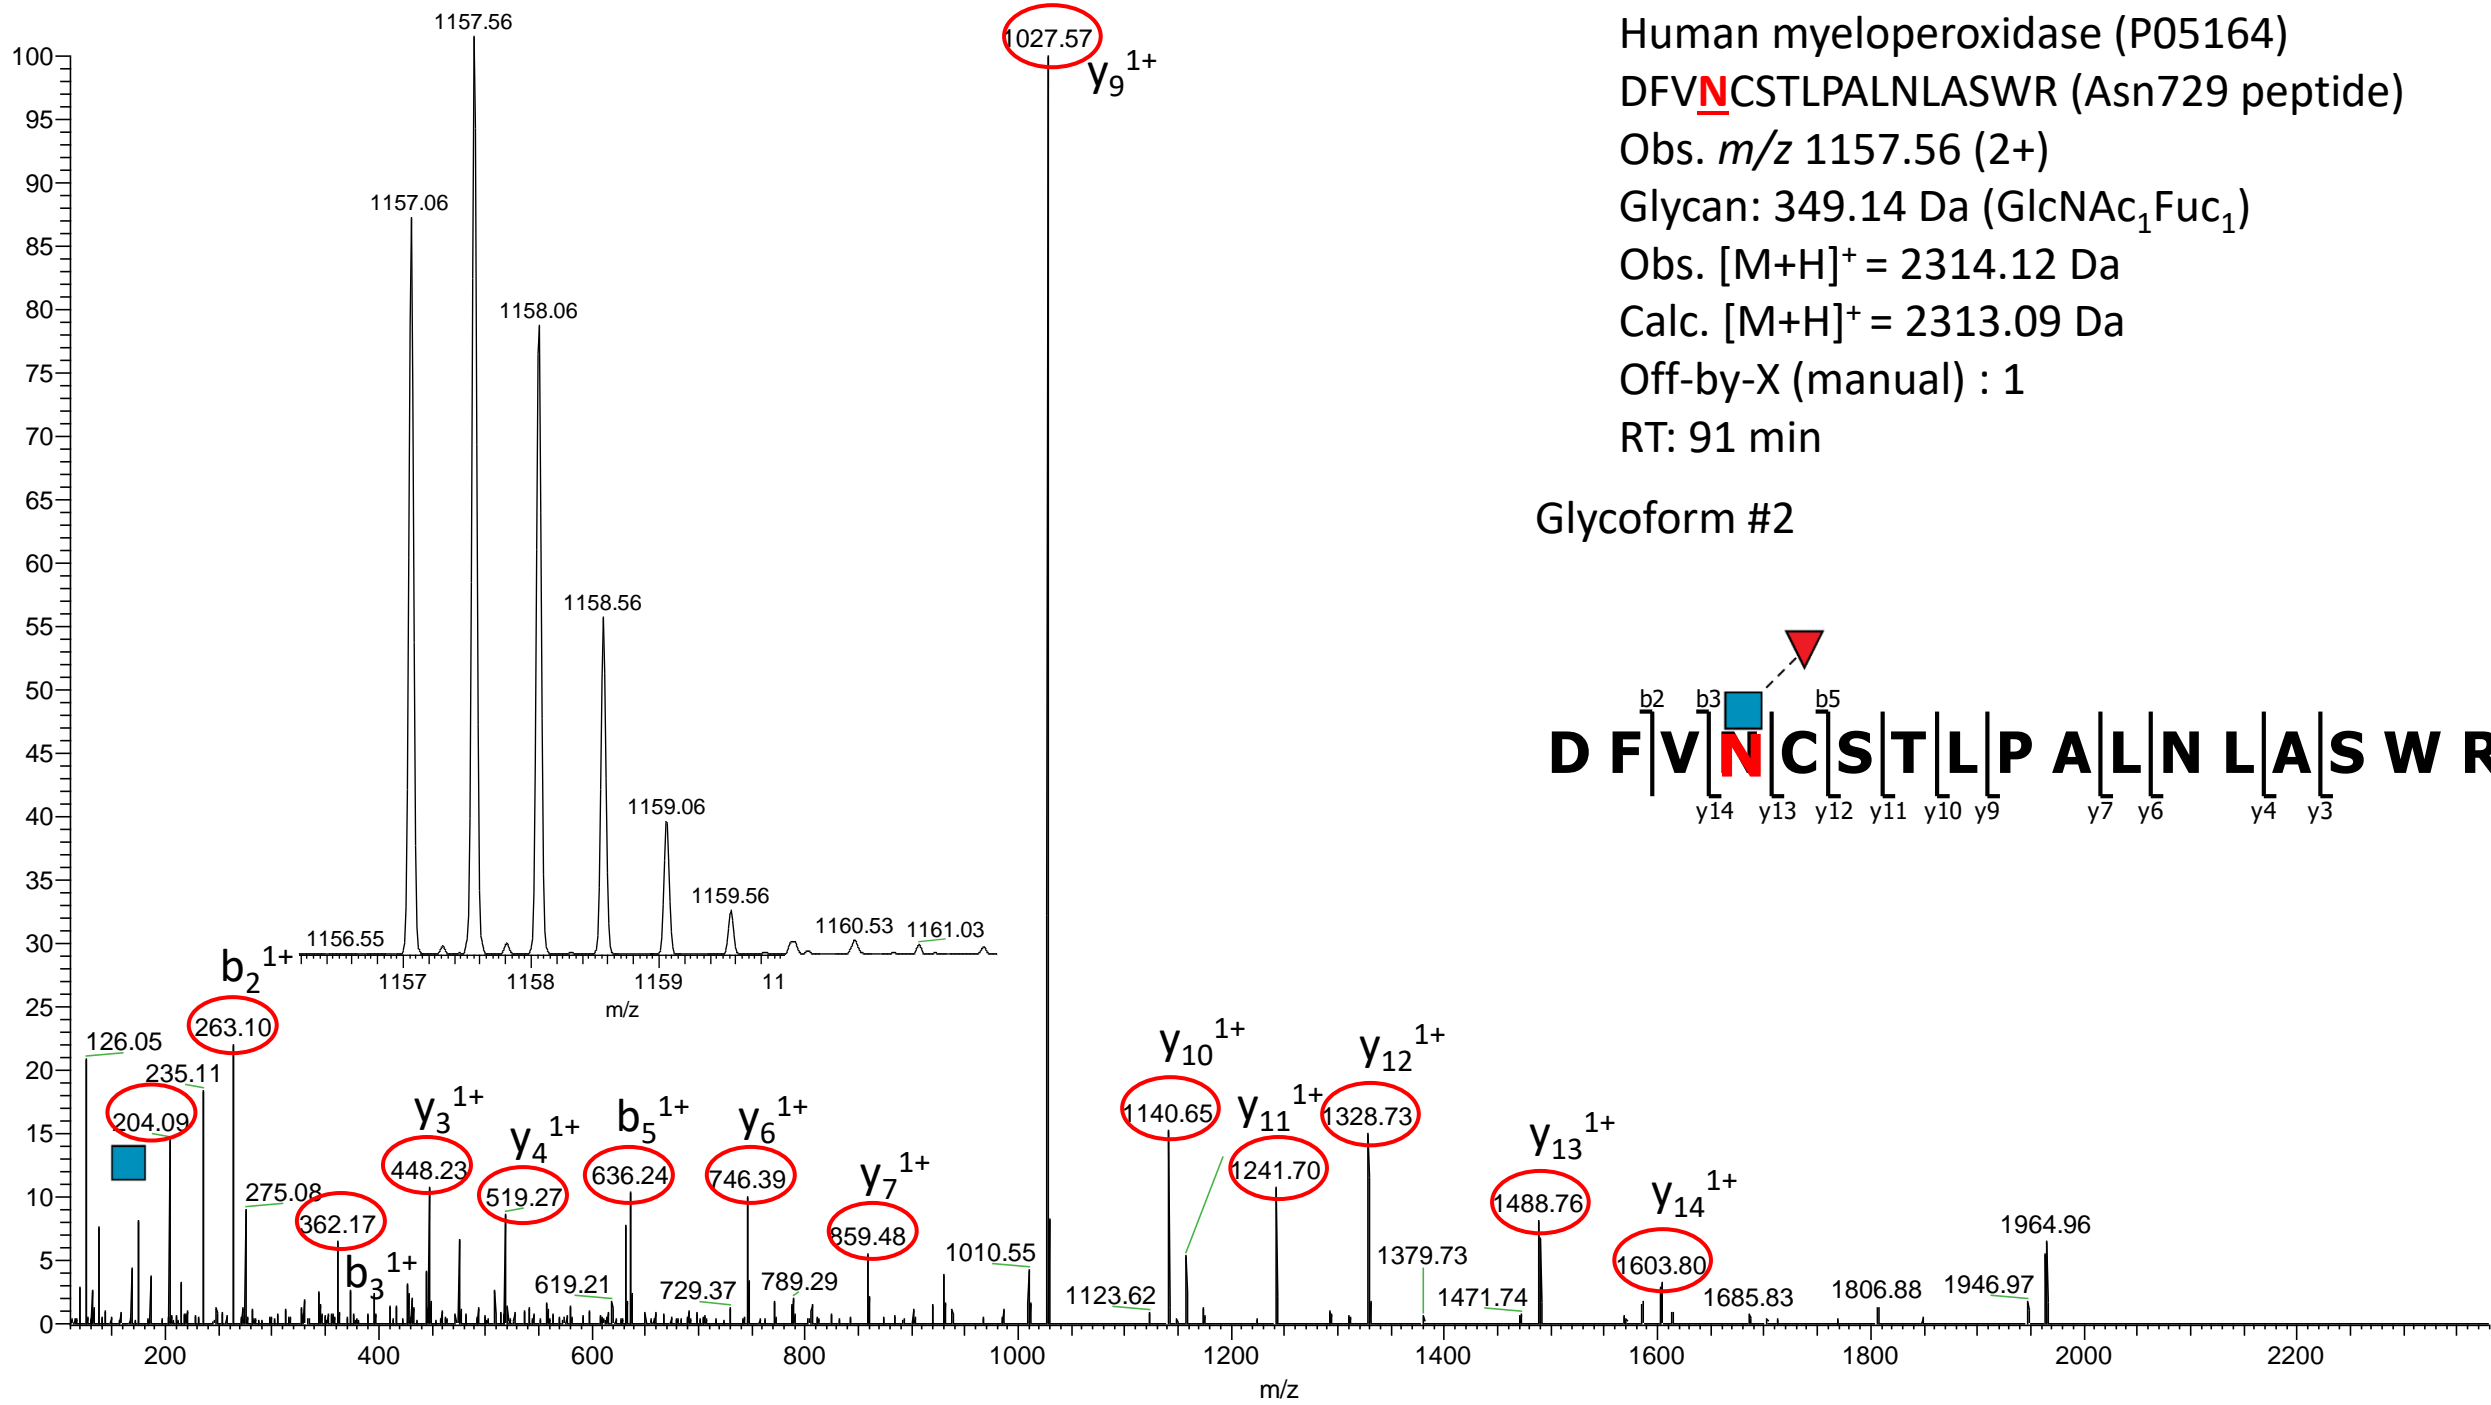

Human myeloperoxidase (P05164)  
DFVNCSTLPALNLSWR (Asn729 peptide)  
Obs.  $m/z$  1185.57 (2+)  
Glycan: 406.15 Da (GlcNAc<sub>2</sub>)  
Obs.  $[M+H]^+$  = 2370.14 Da  
Calc.  $[M+H]^+$  = 2370.11 Da  
RT: 90 min

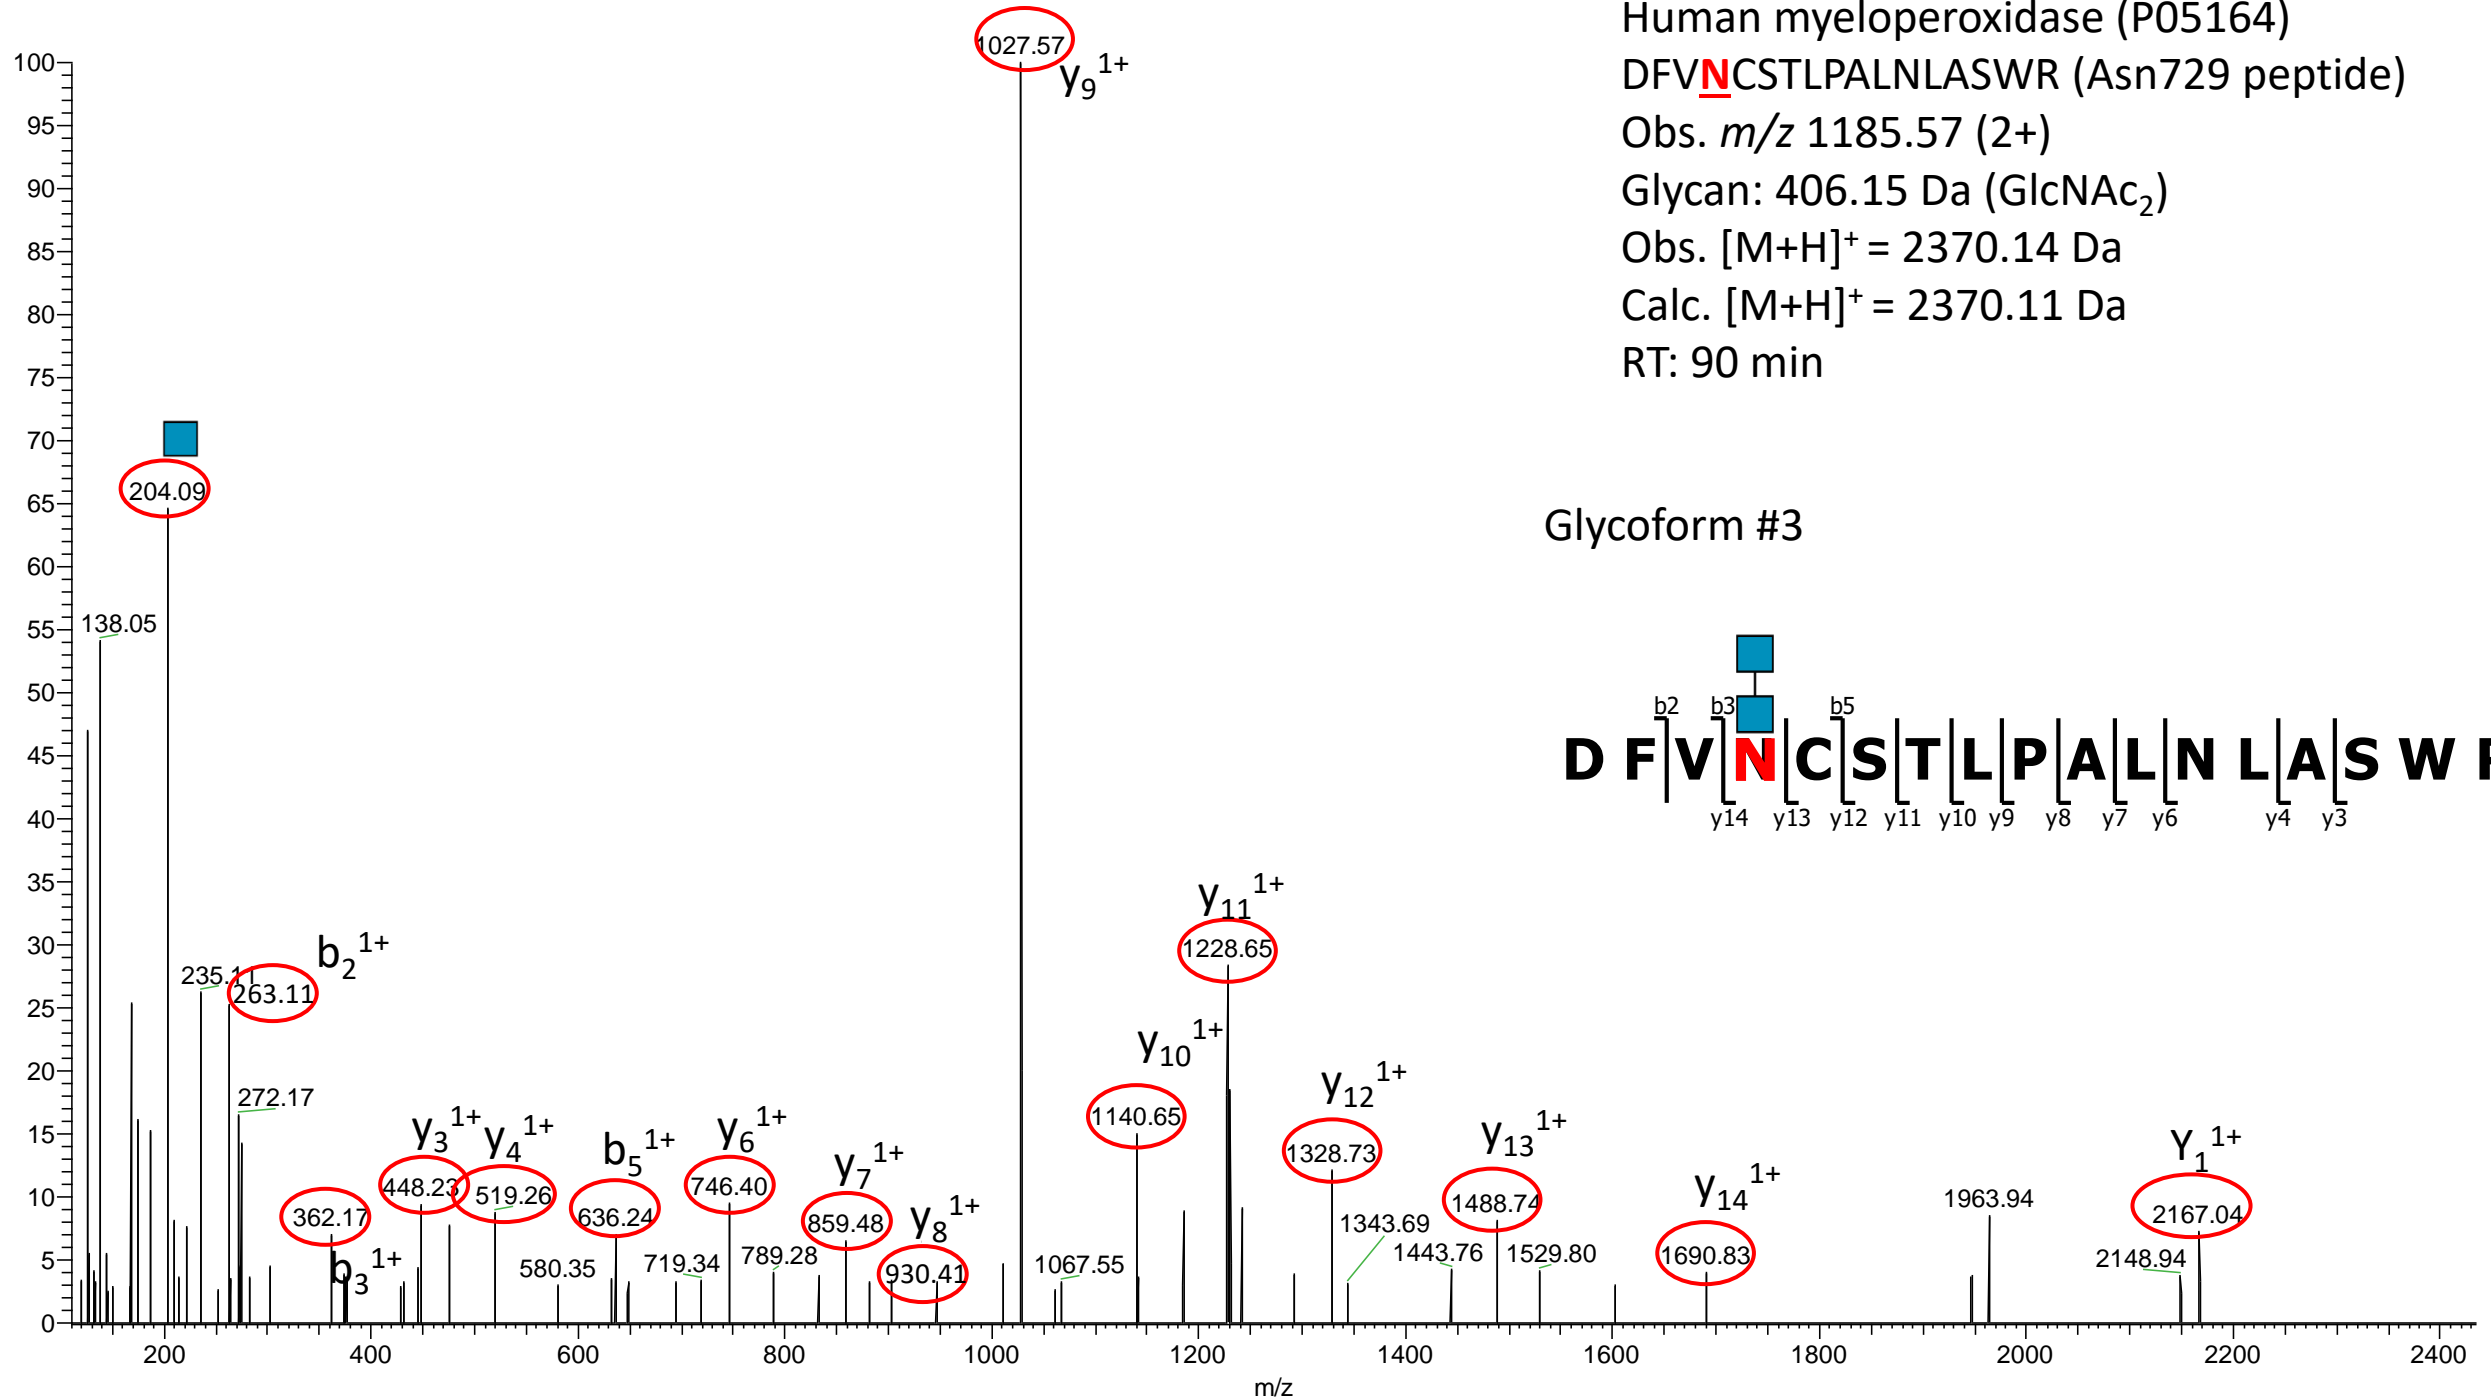

Human myeloperoxidase (P05164)  
DFVNCSTLPALNLSWR (Asn729 peptide)

Obs. m/z 1259.10 (2+)

Glycan: 552.22 Da (GlcNAc<sub>2</sub>Fuc<sub>1</sub>)

Obs. [M+H]<sup>+</sup> = 2517.20 Da

Calc. [M+H]<sup>+</sup> = 2516.17 Da

Off-by-X (manual) : 1

RT: 89 min

Glycoform #4

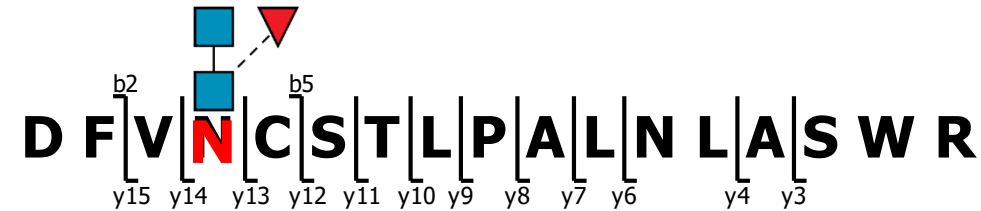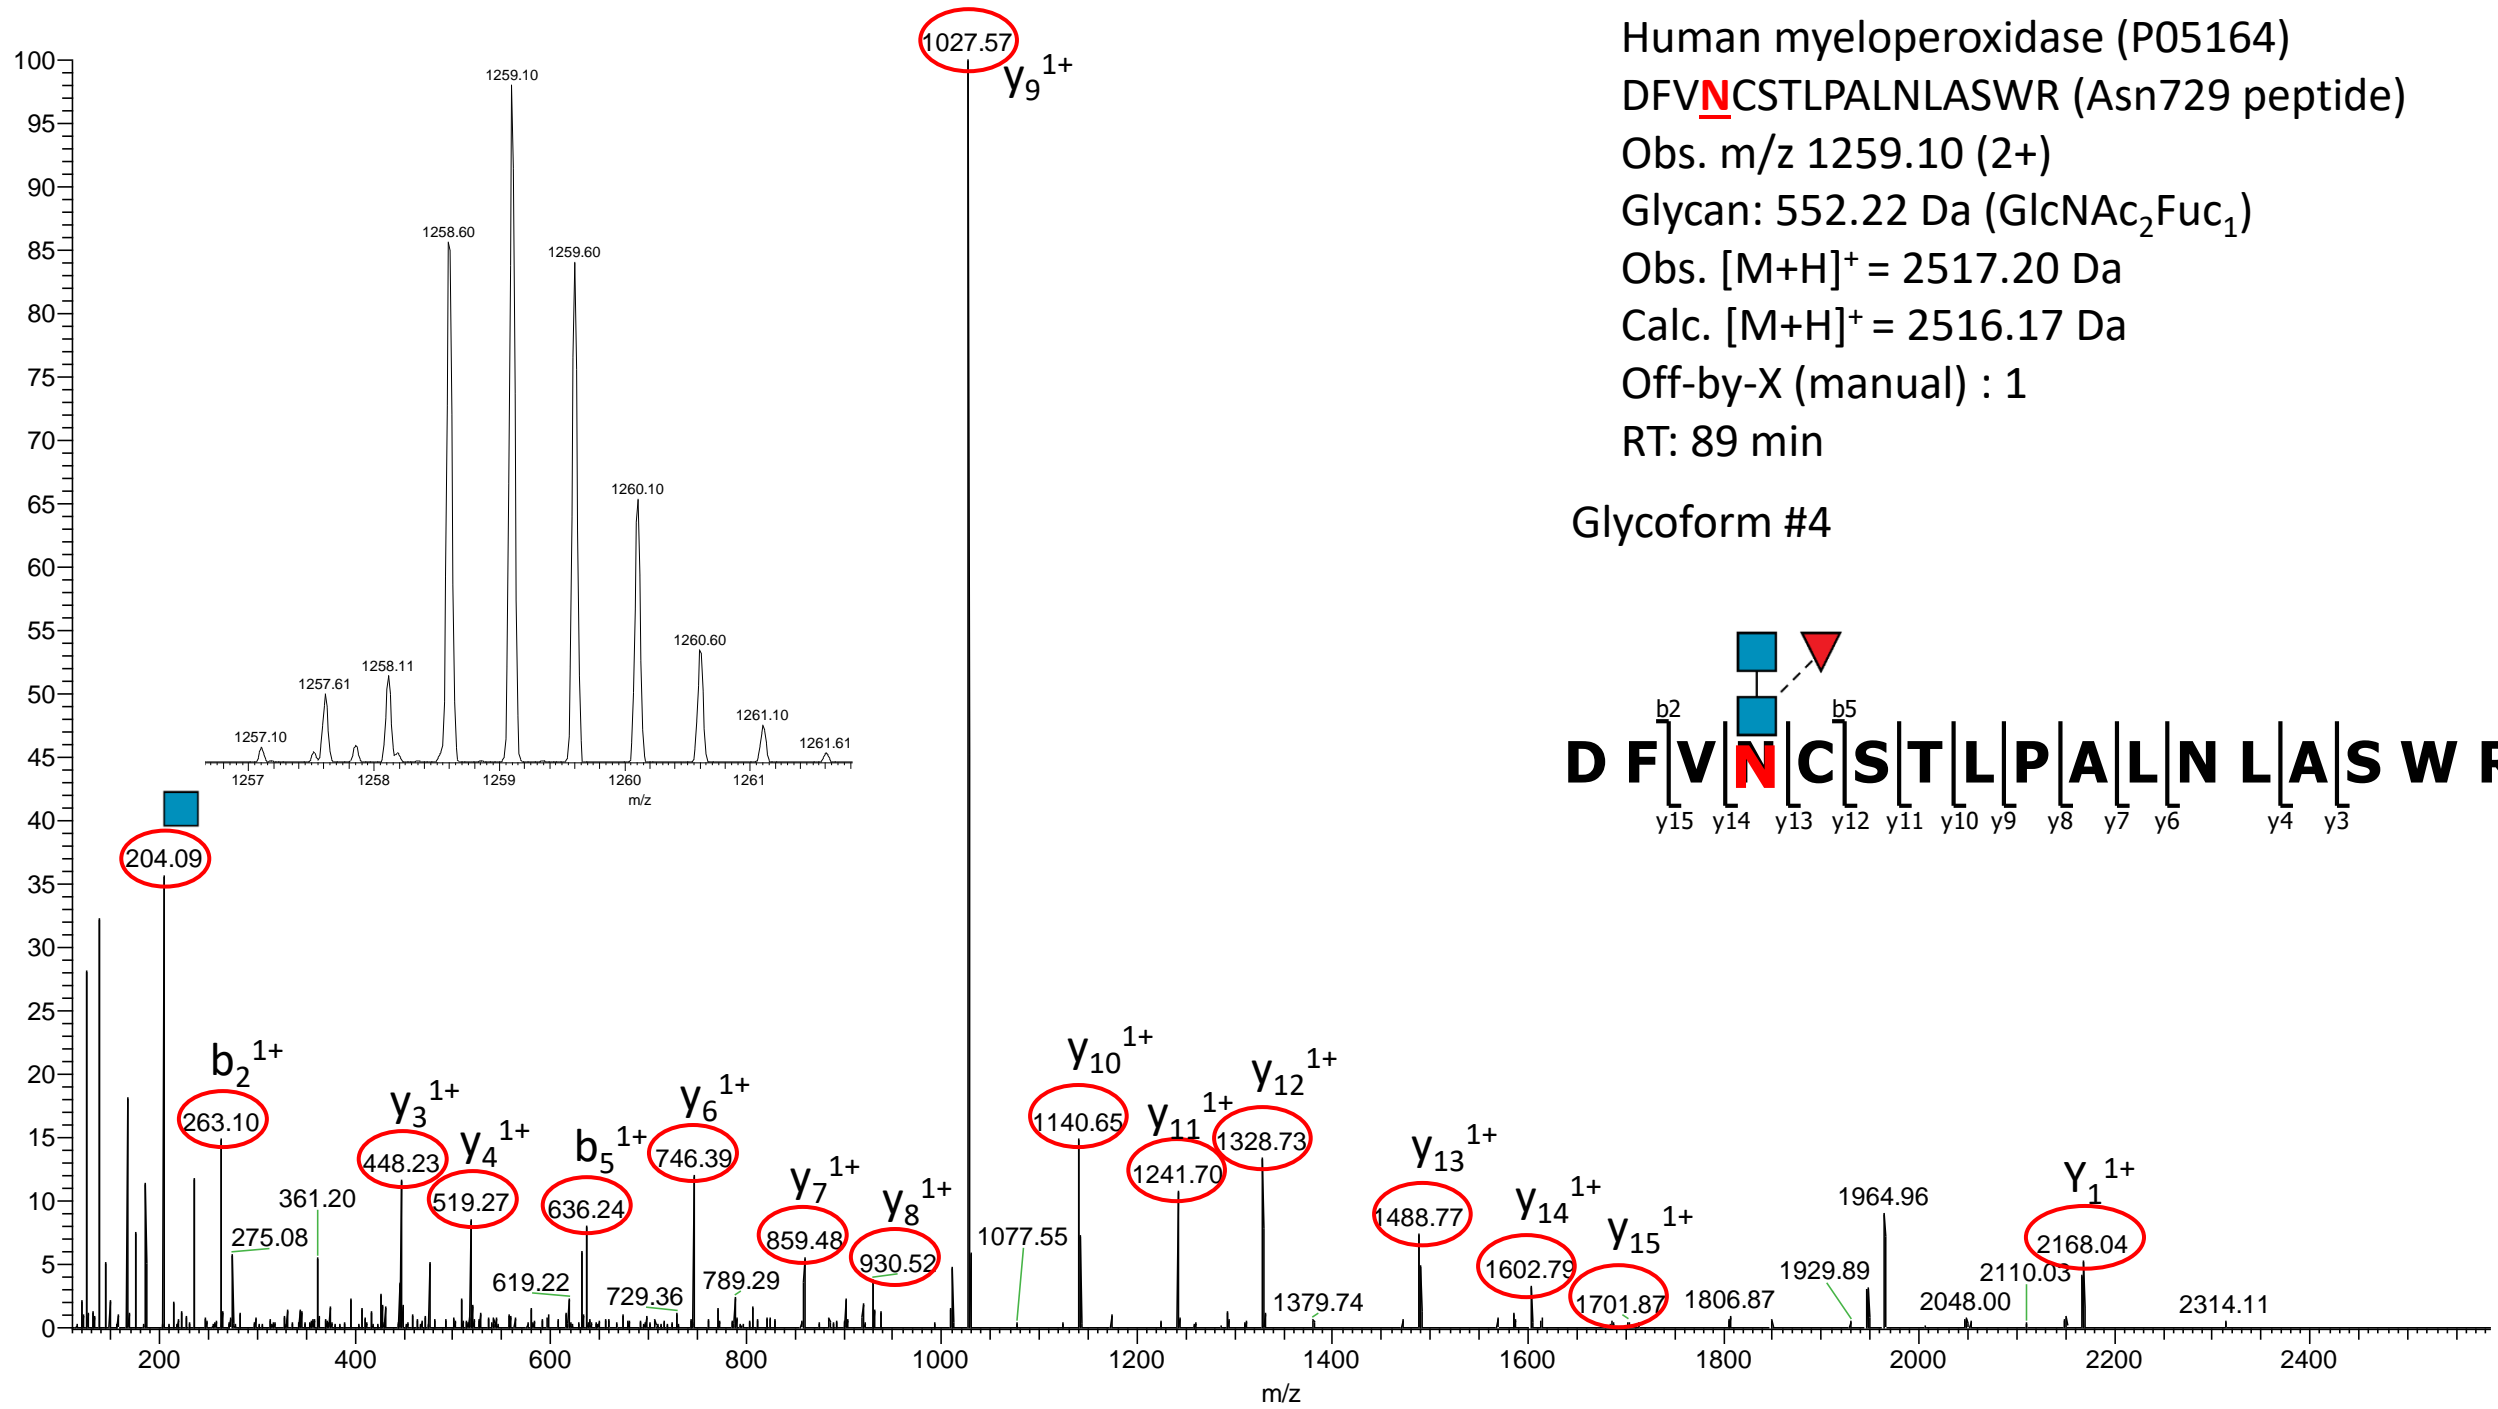

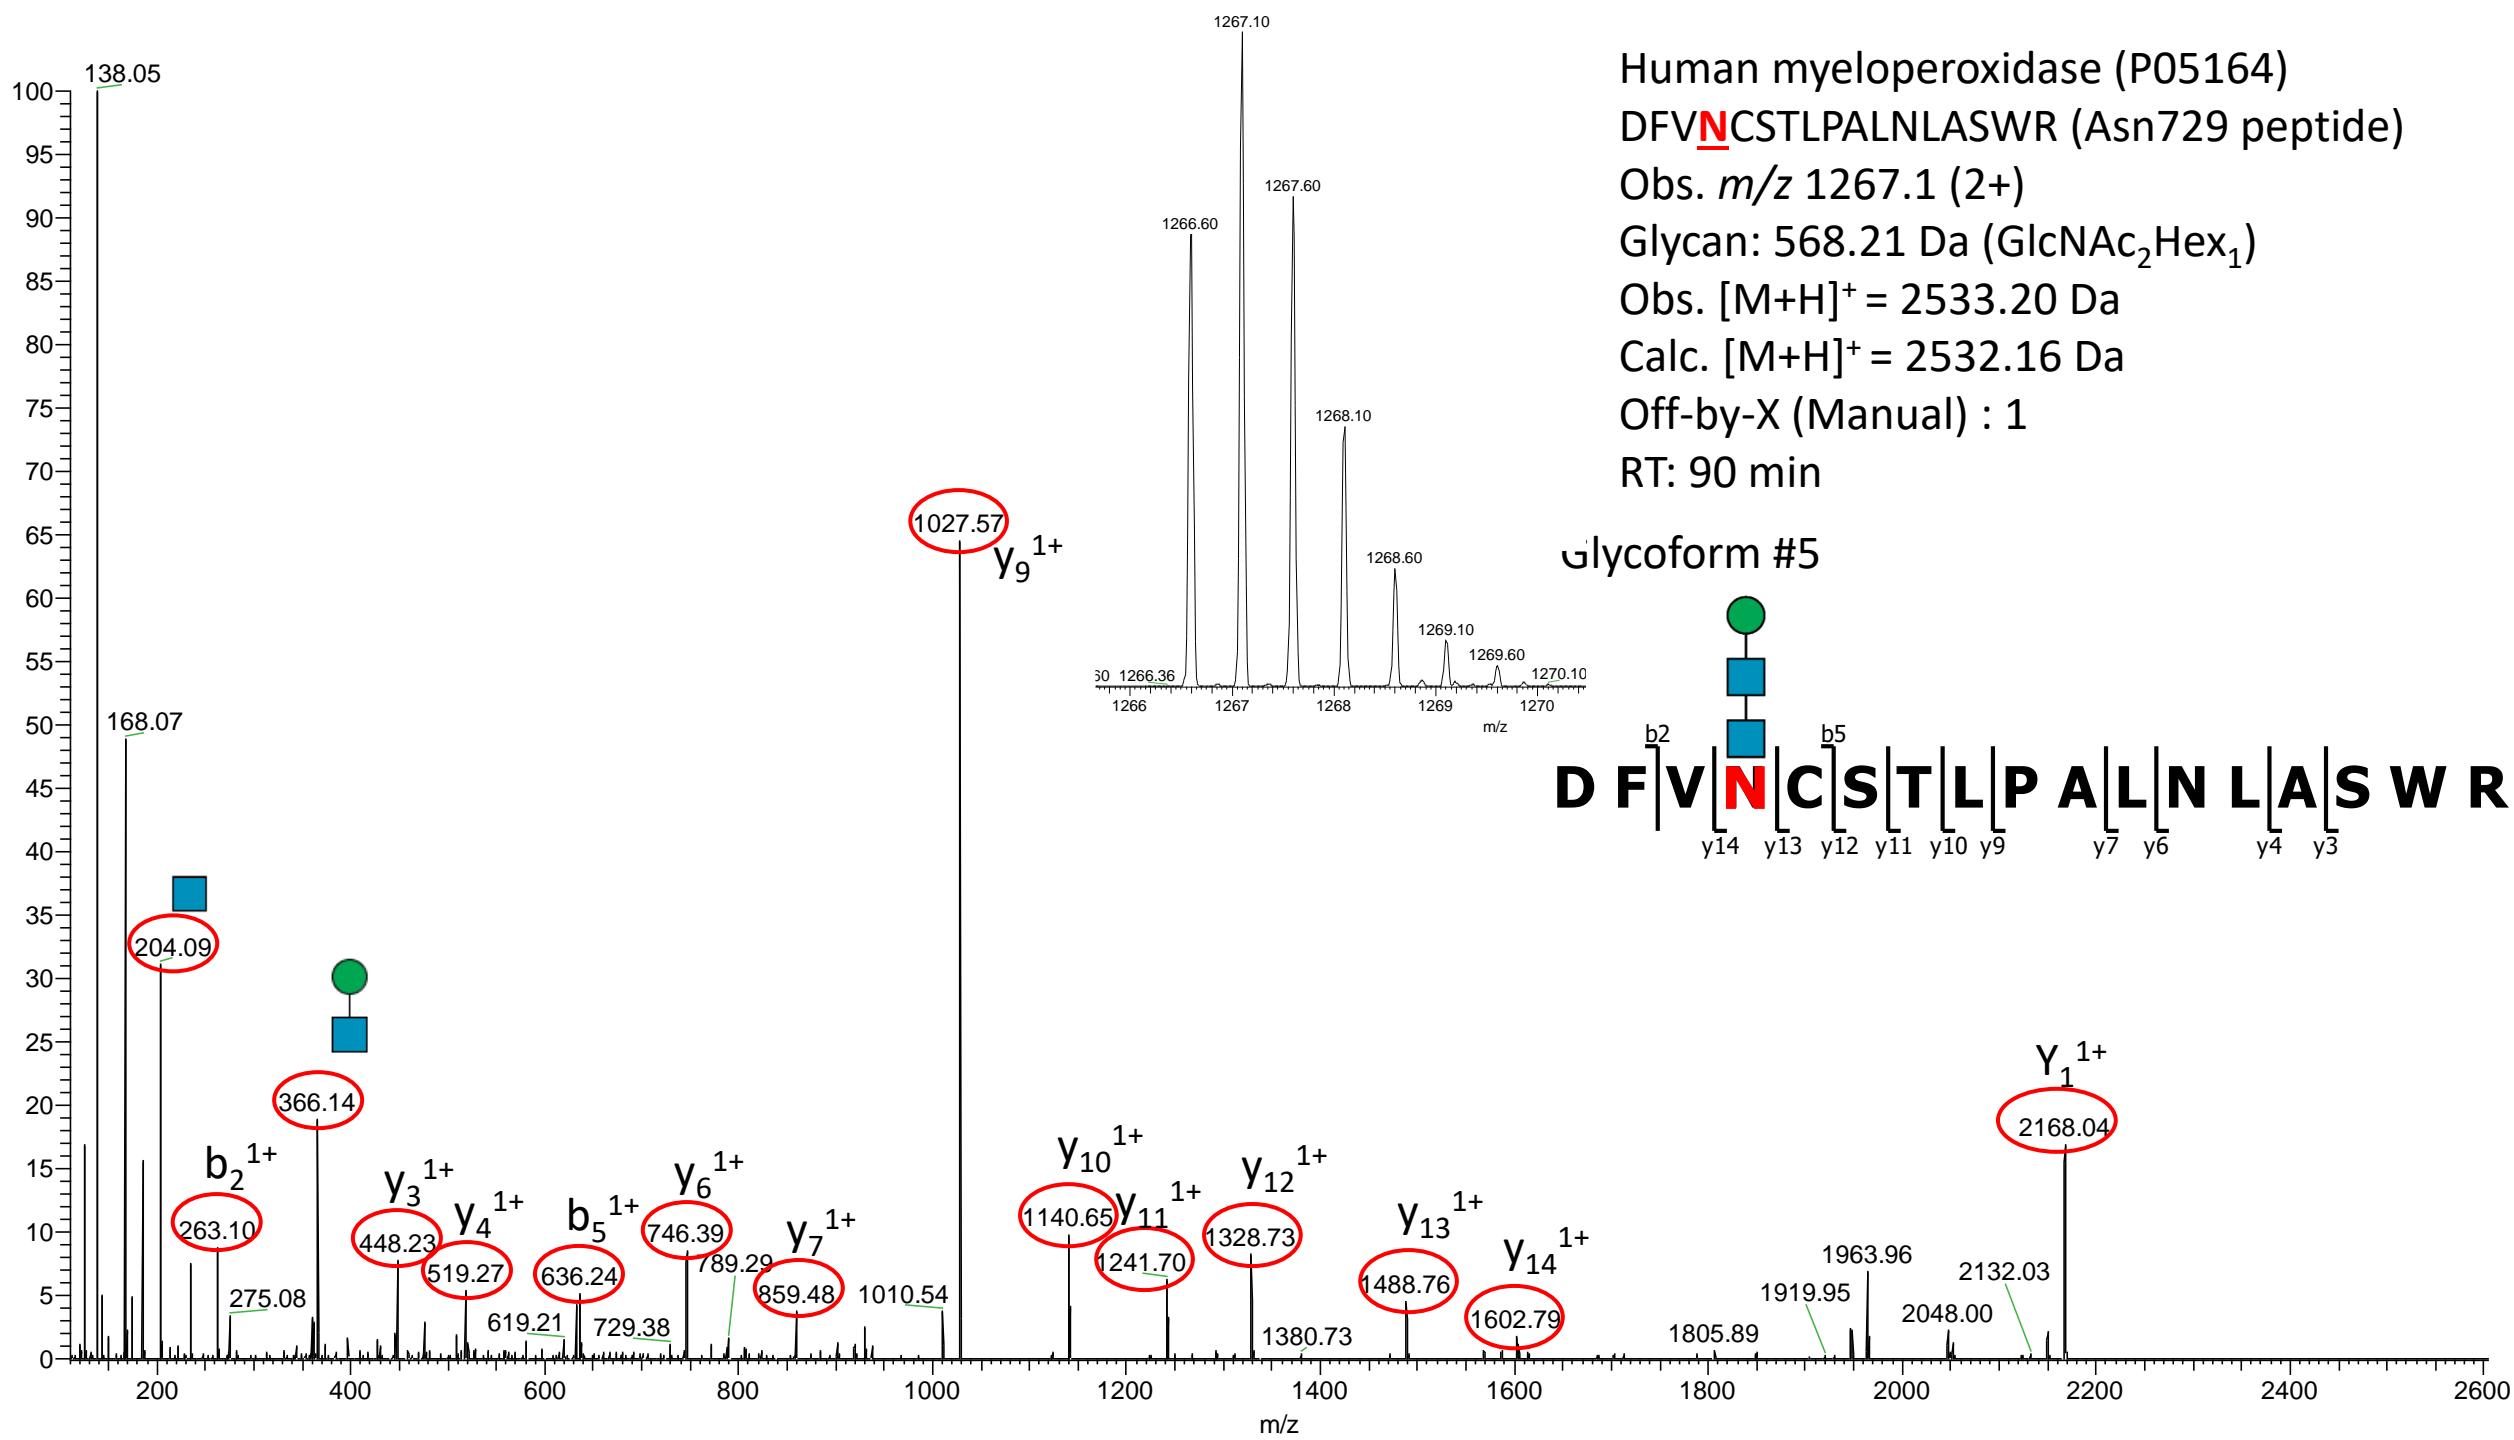

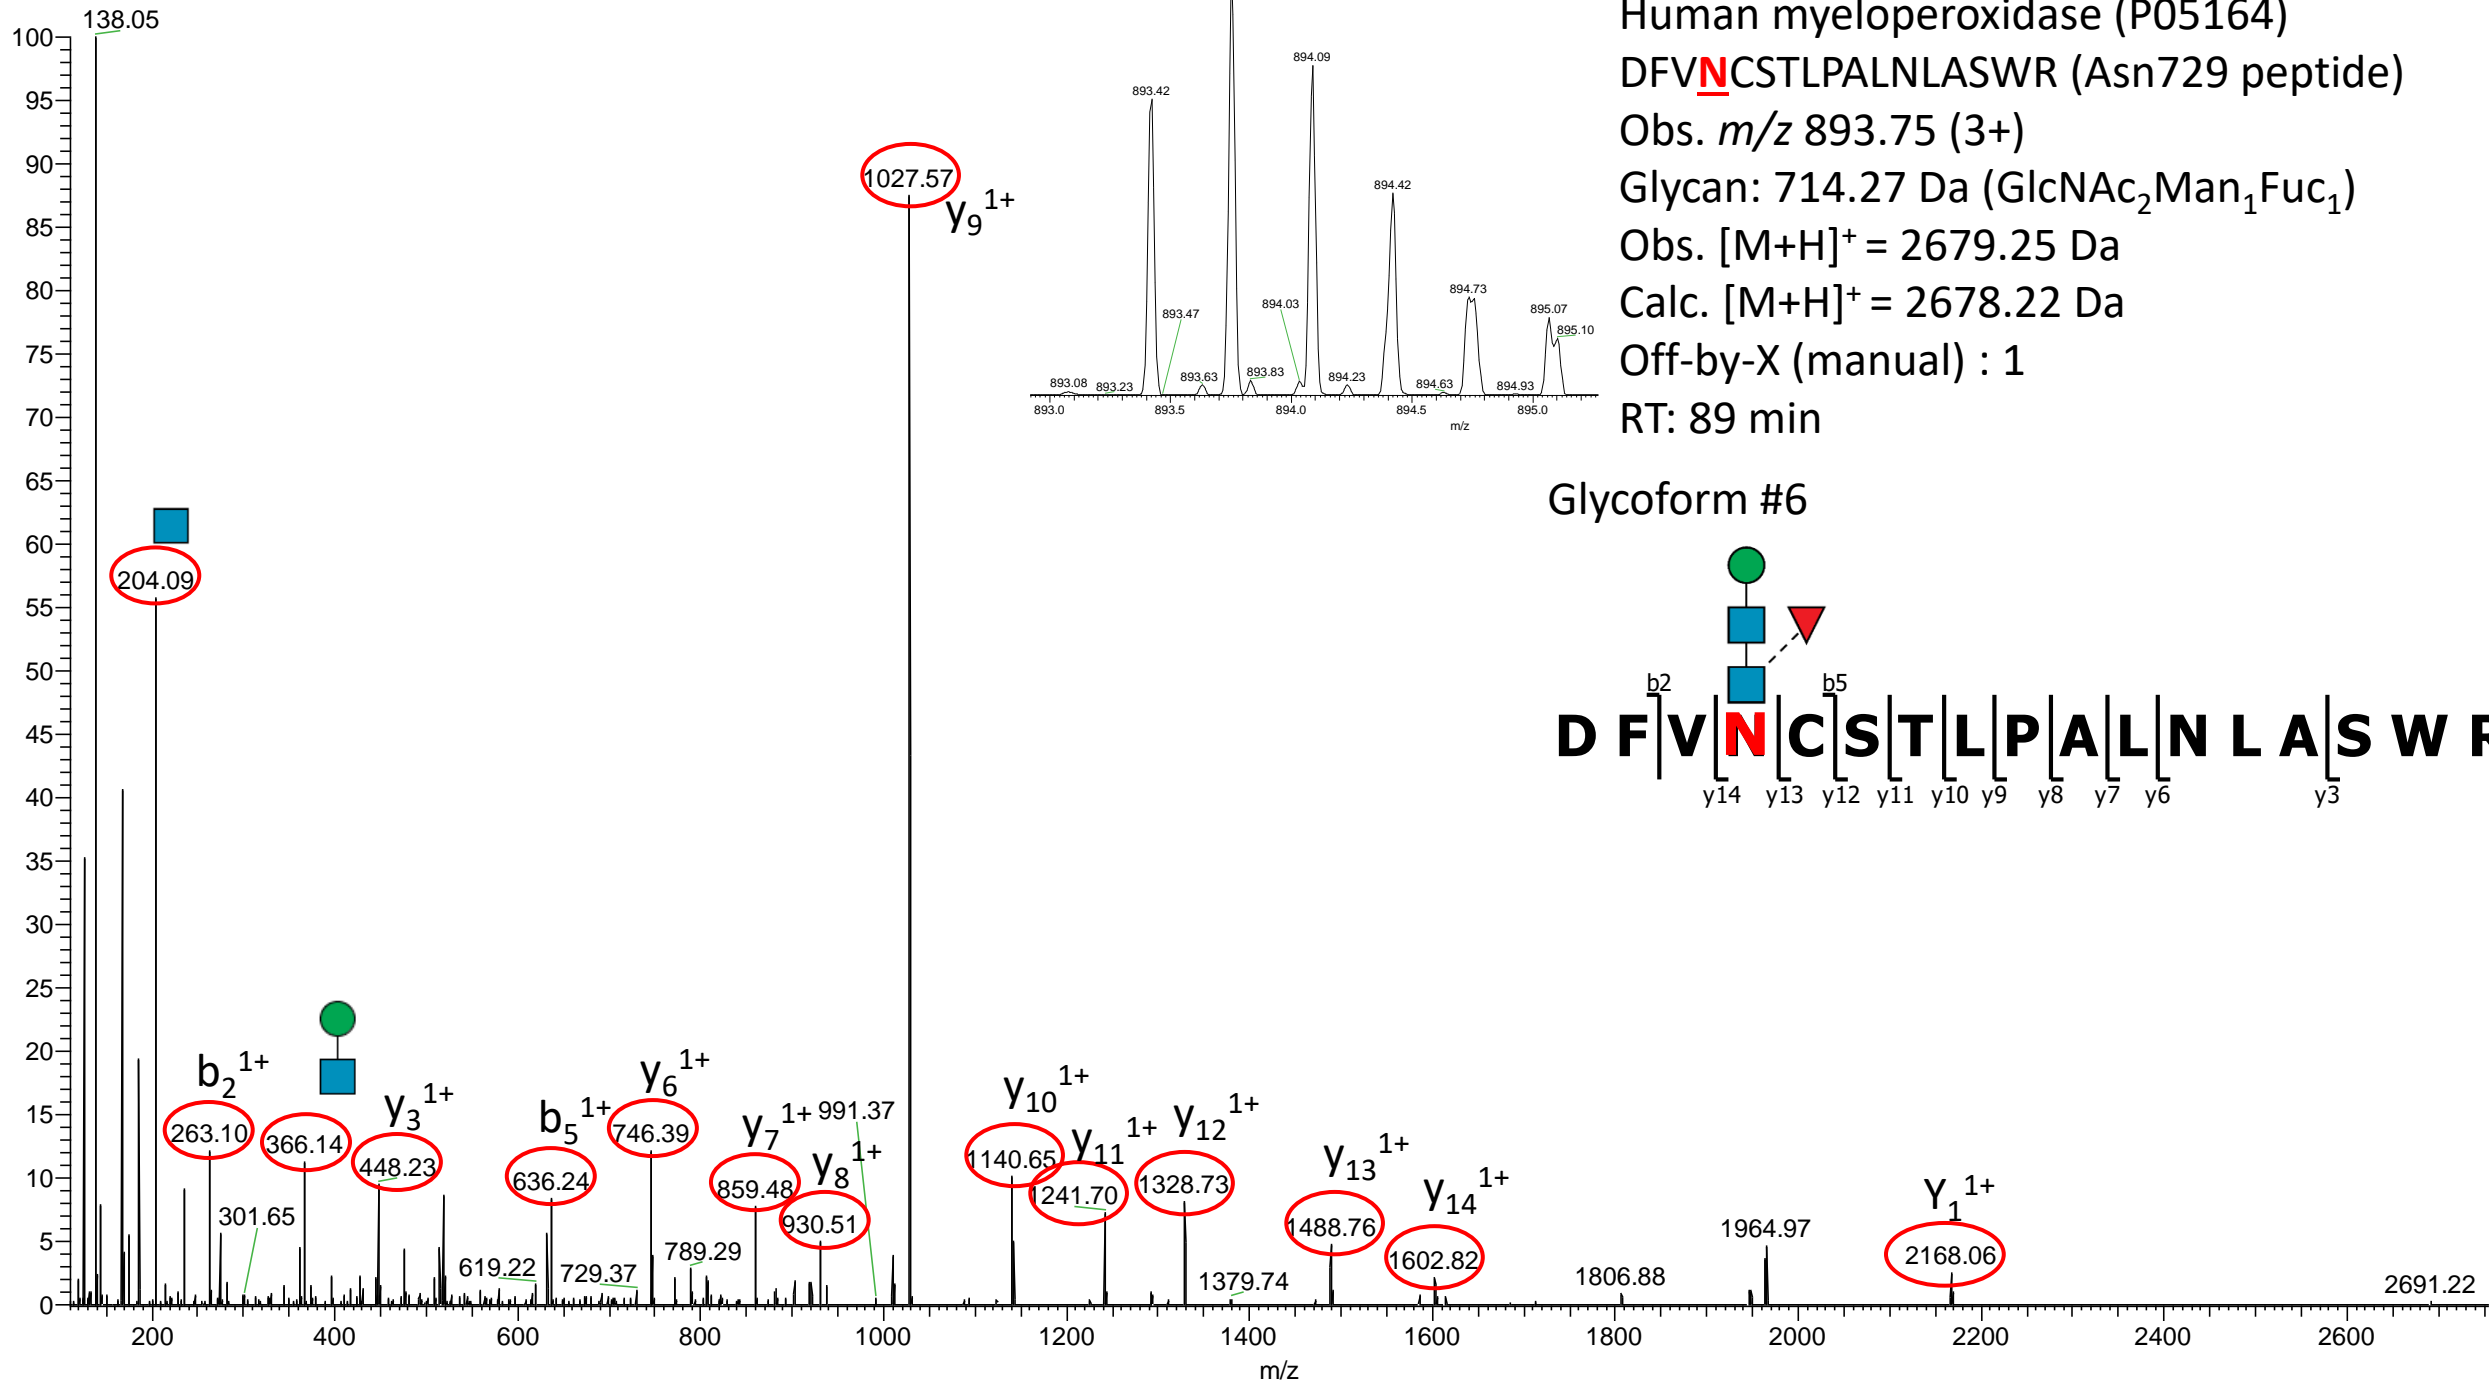

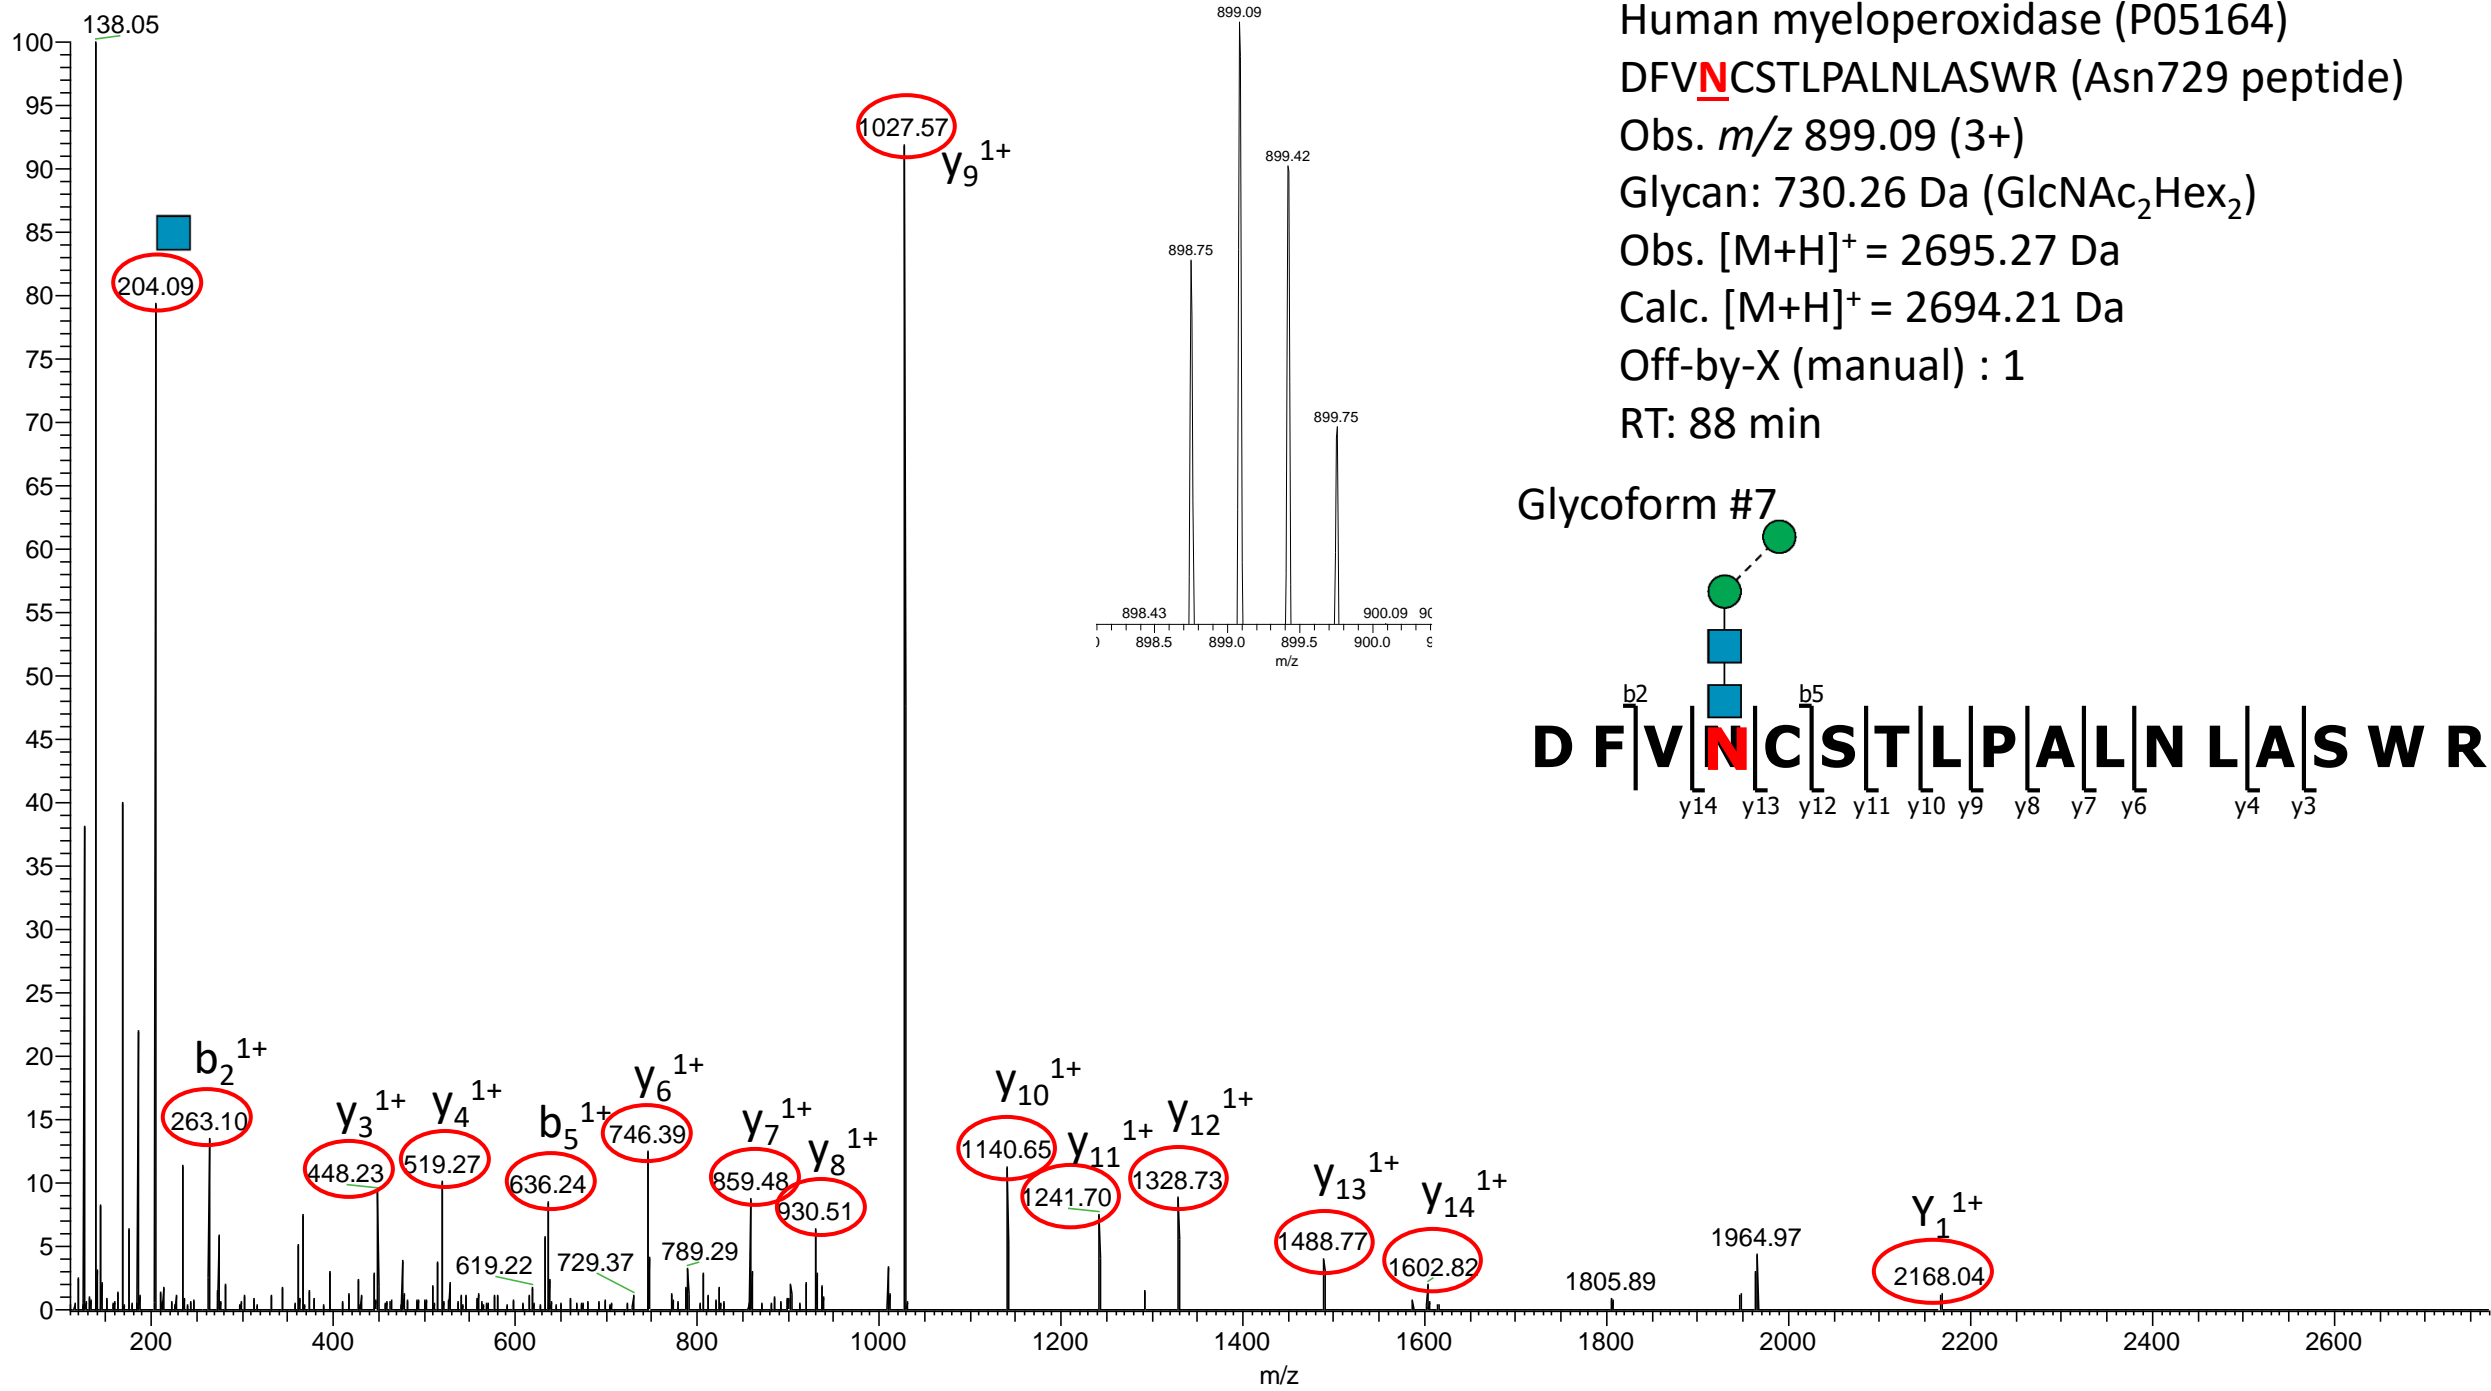

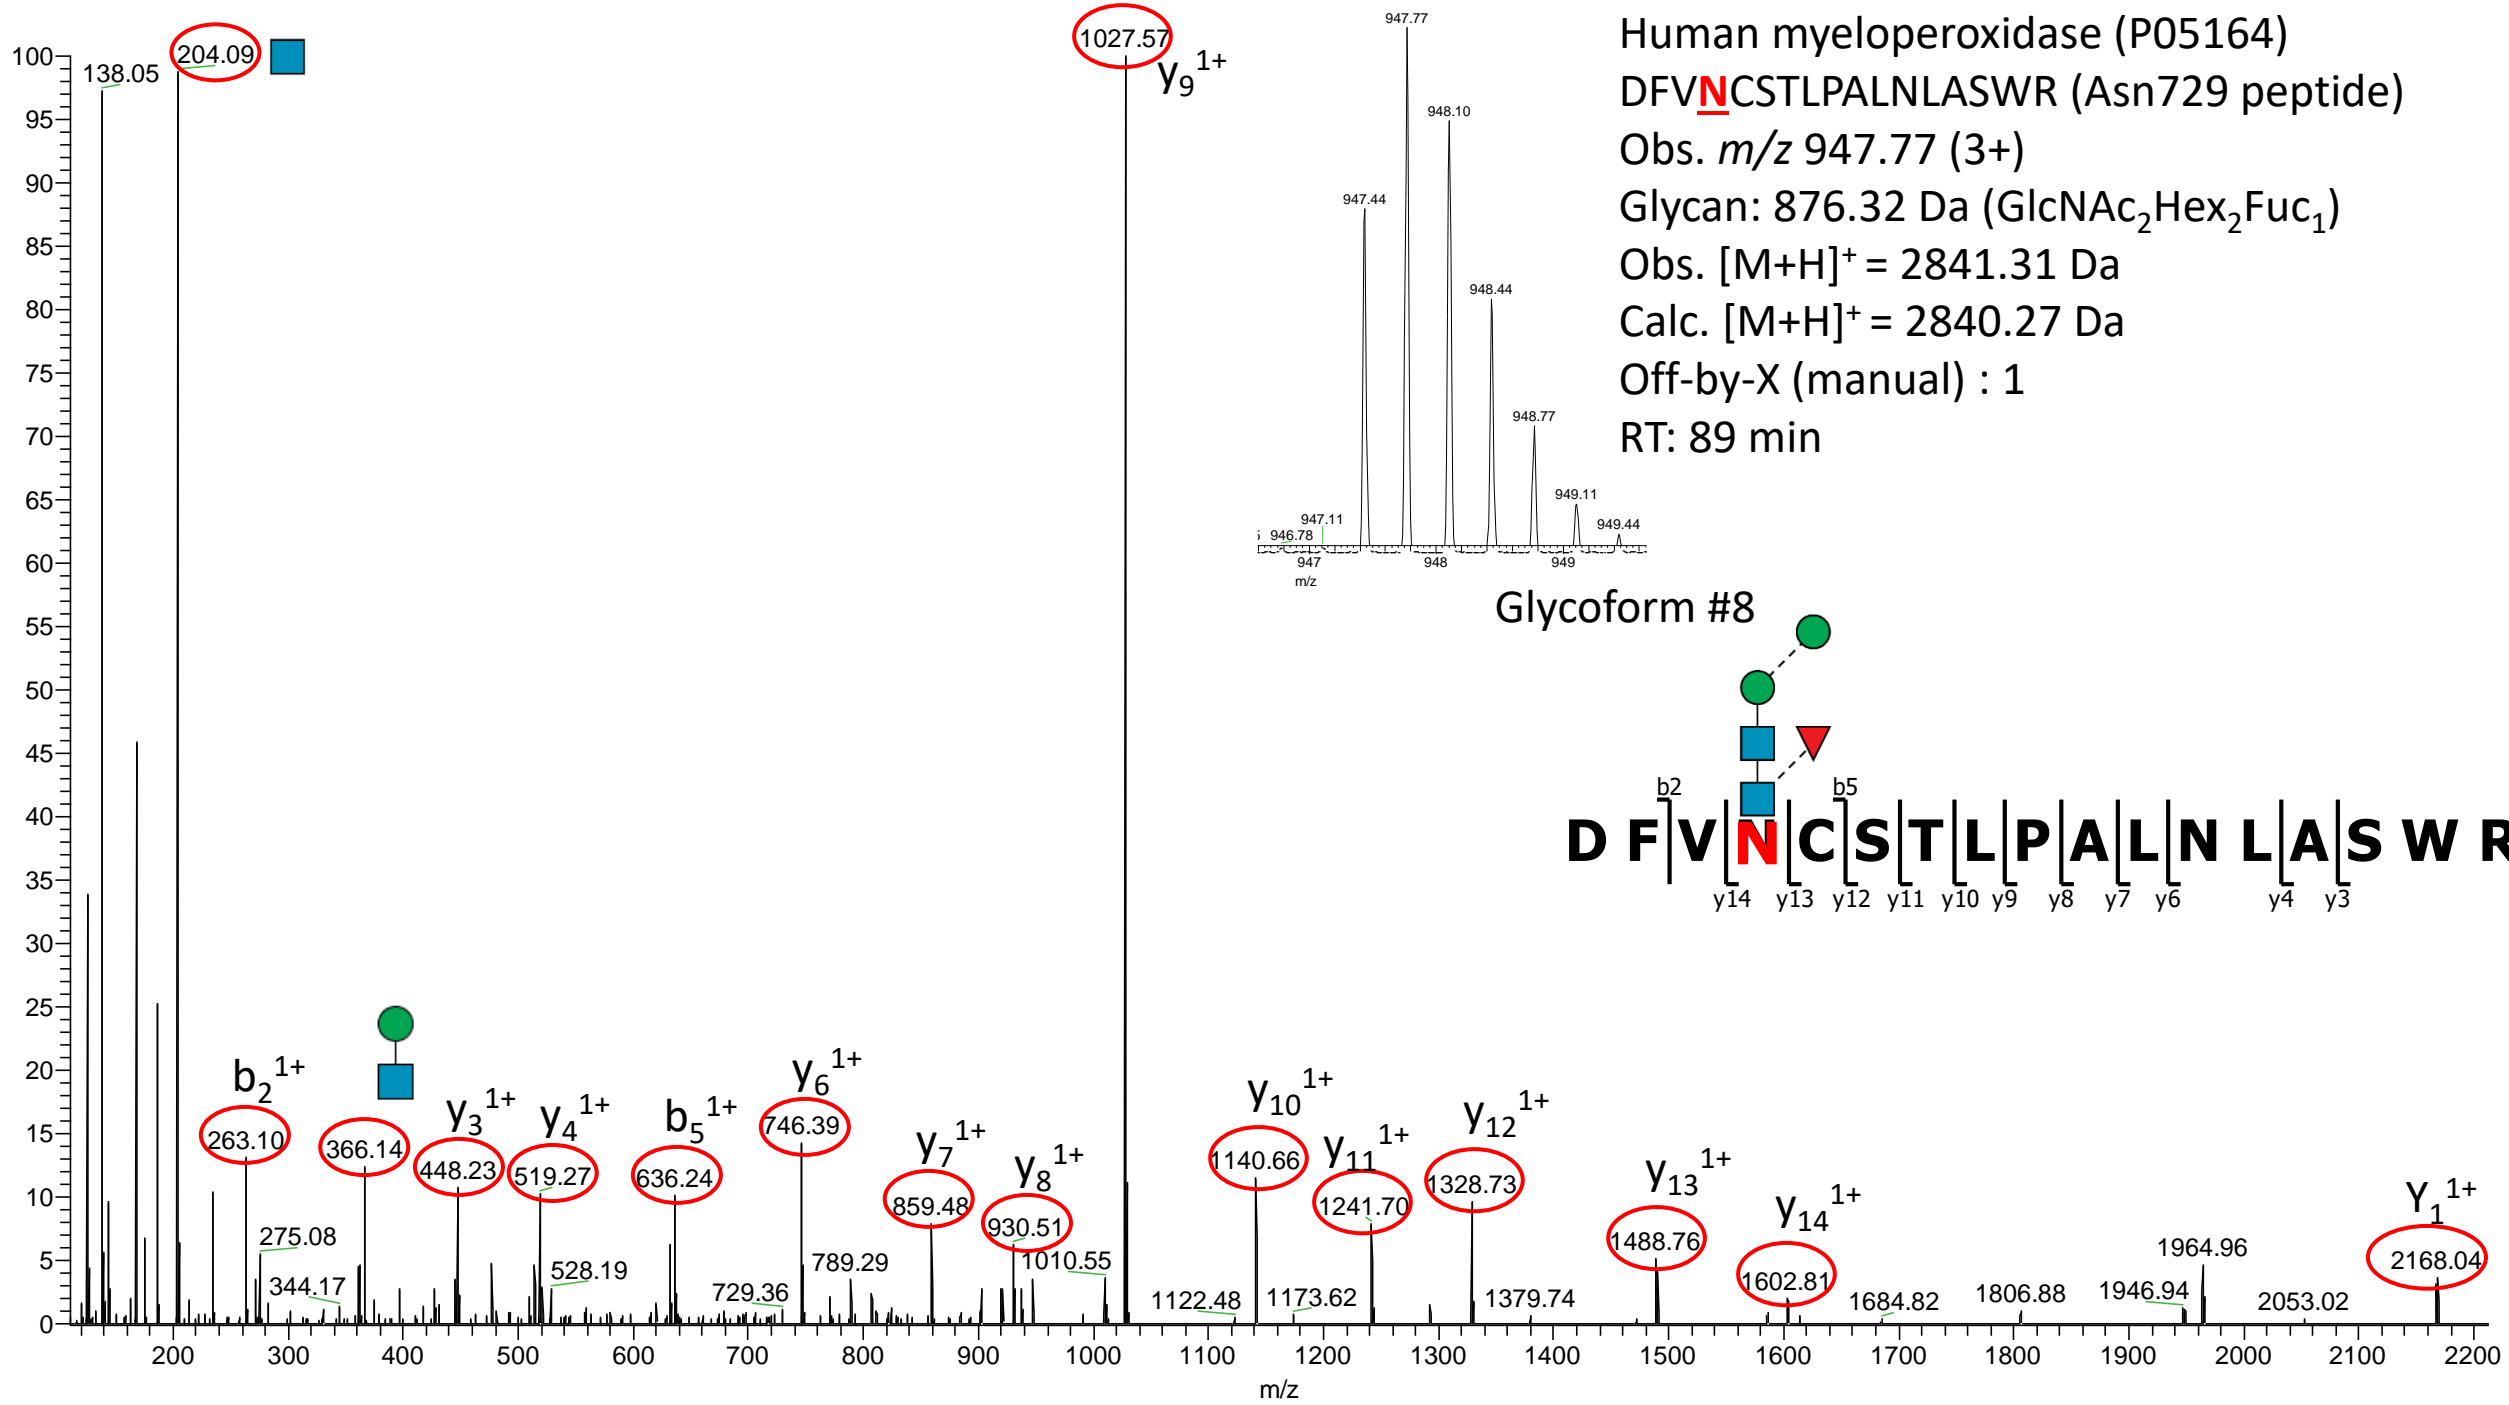

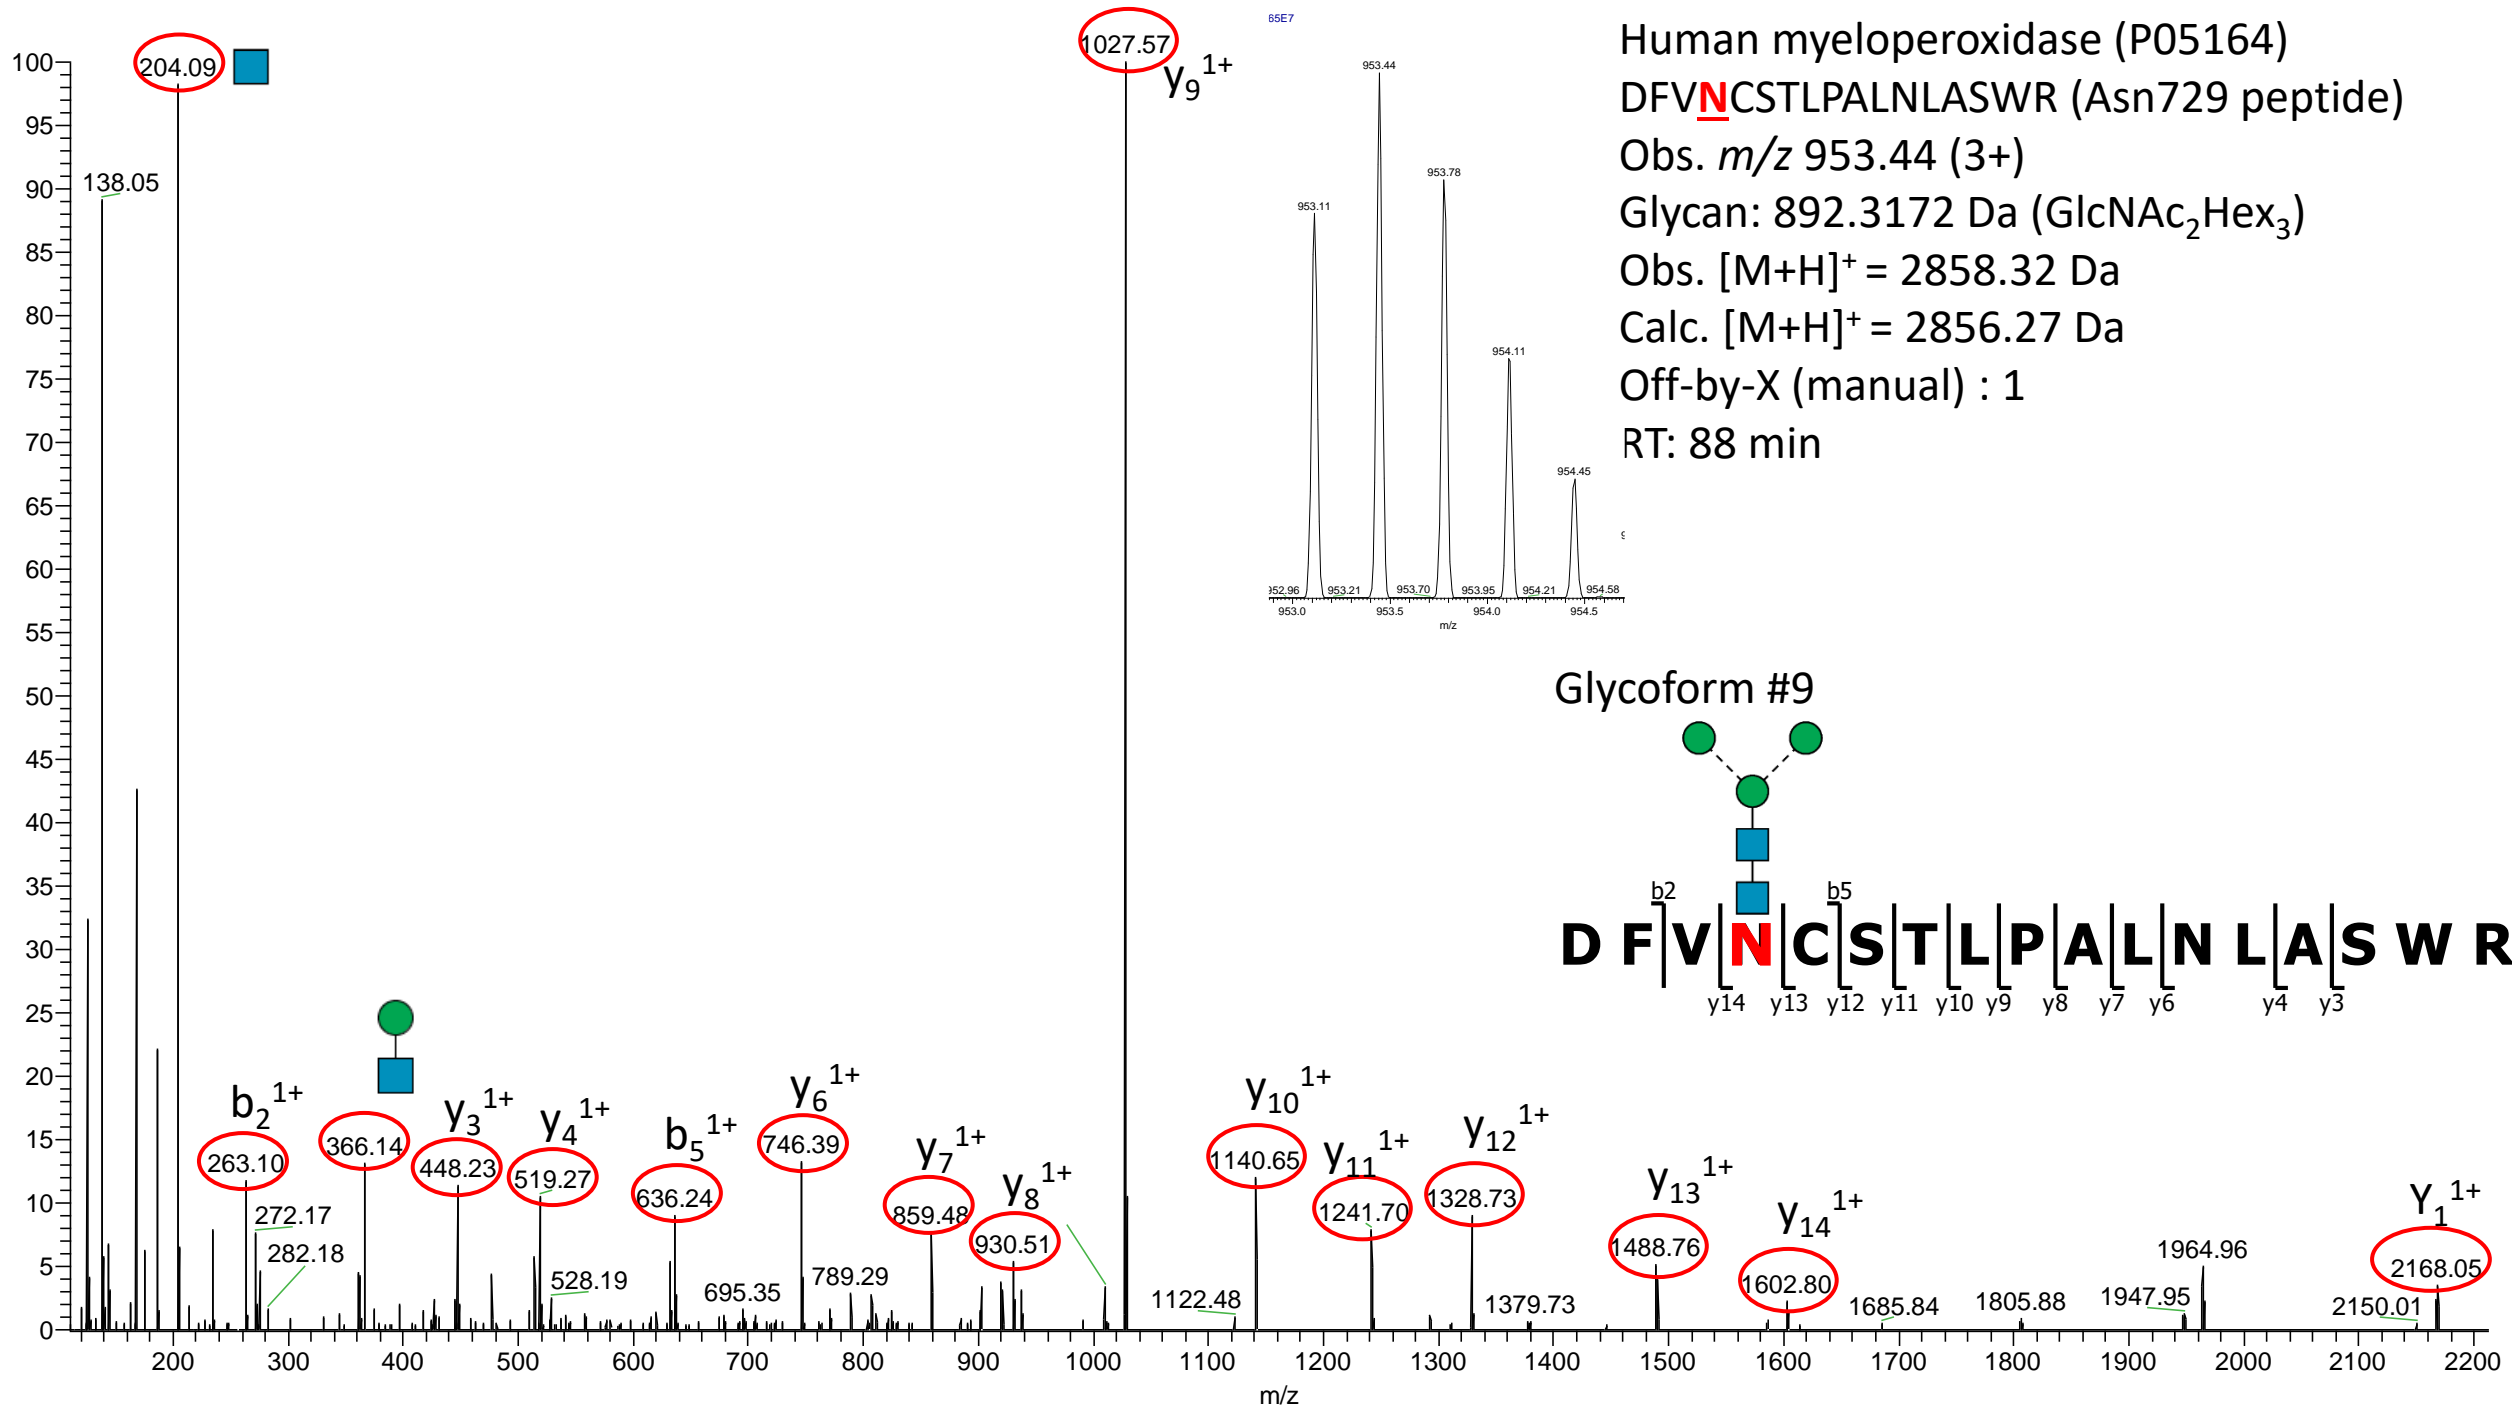



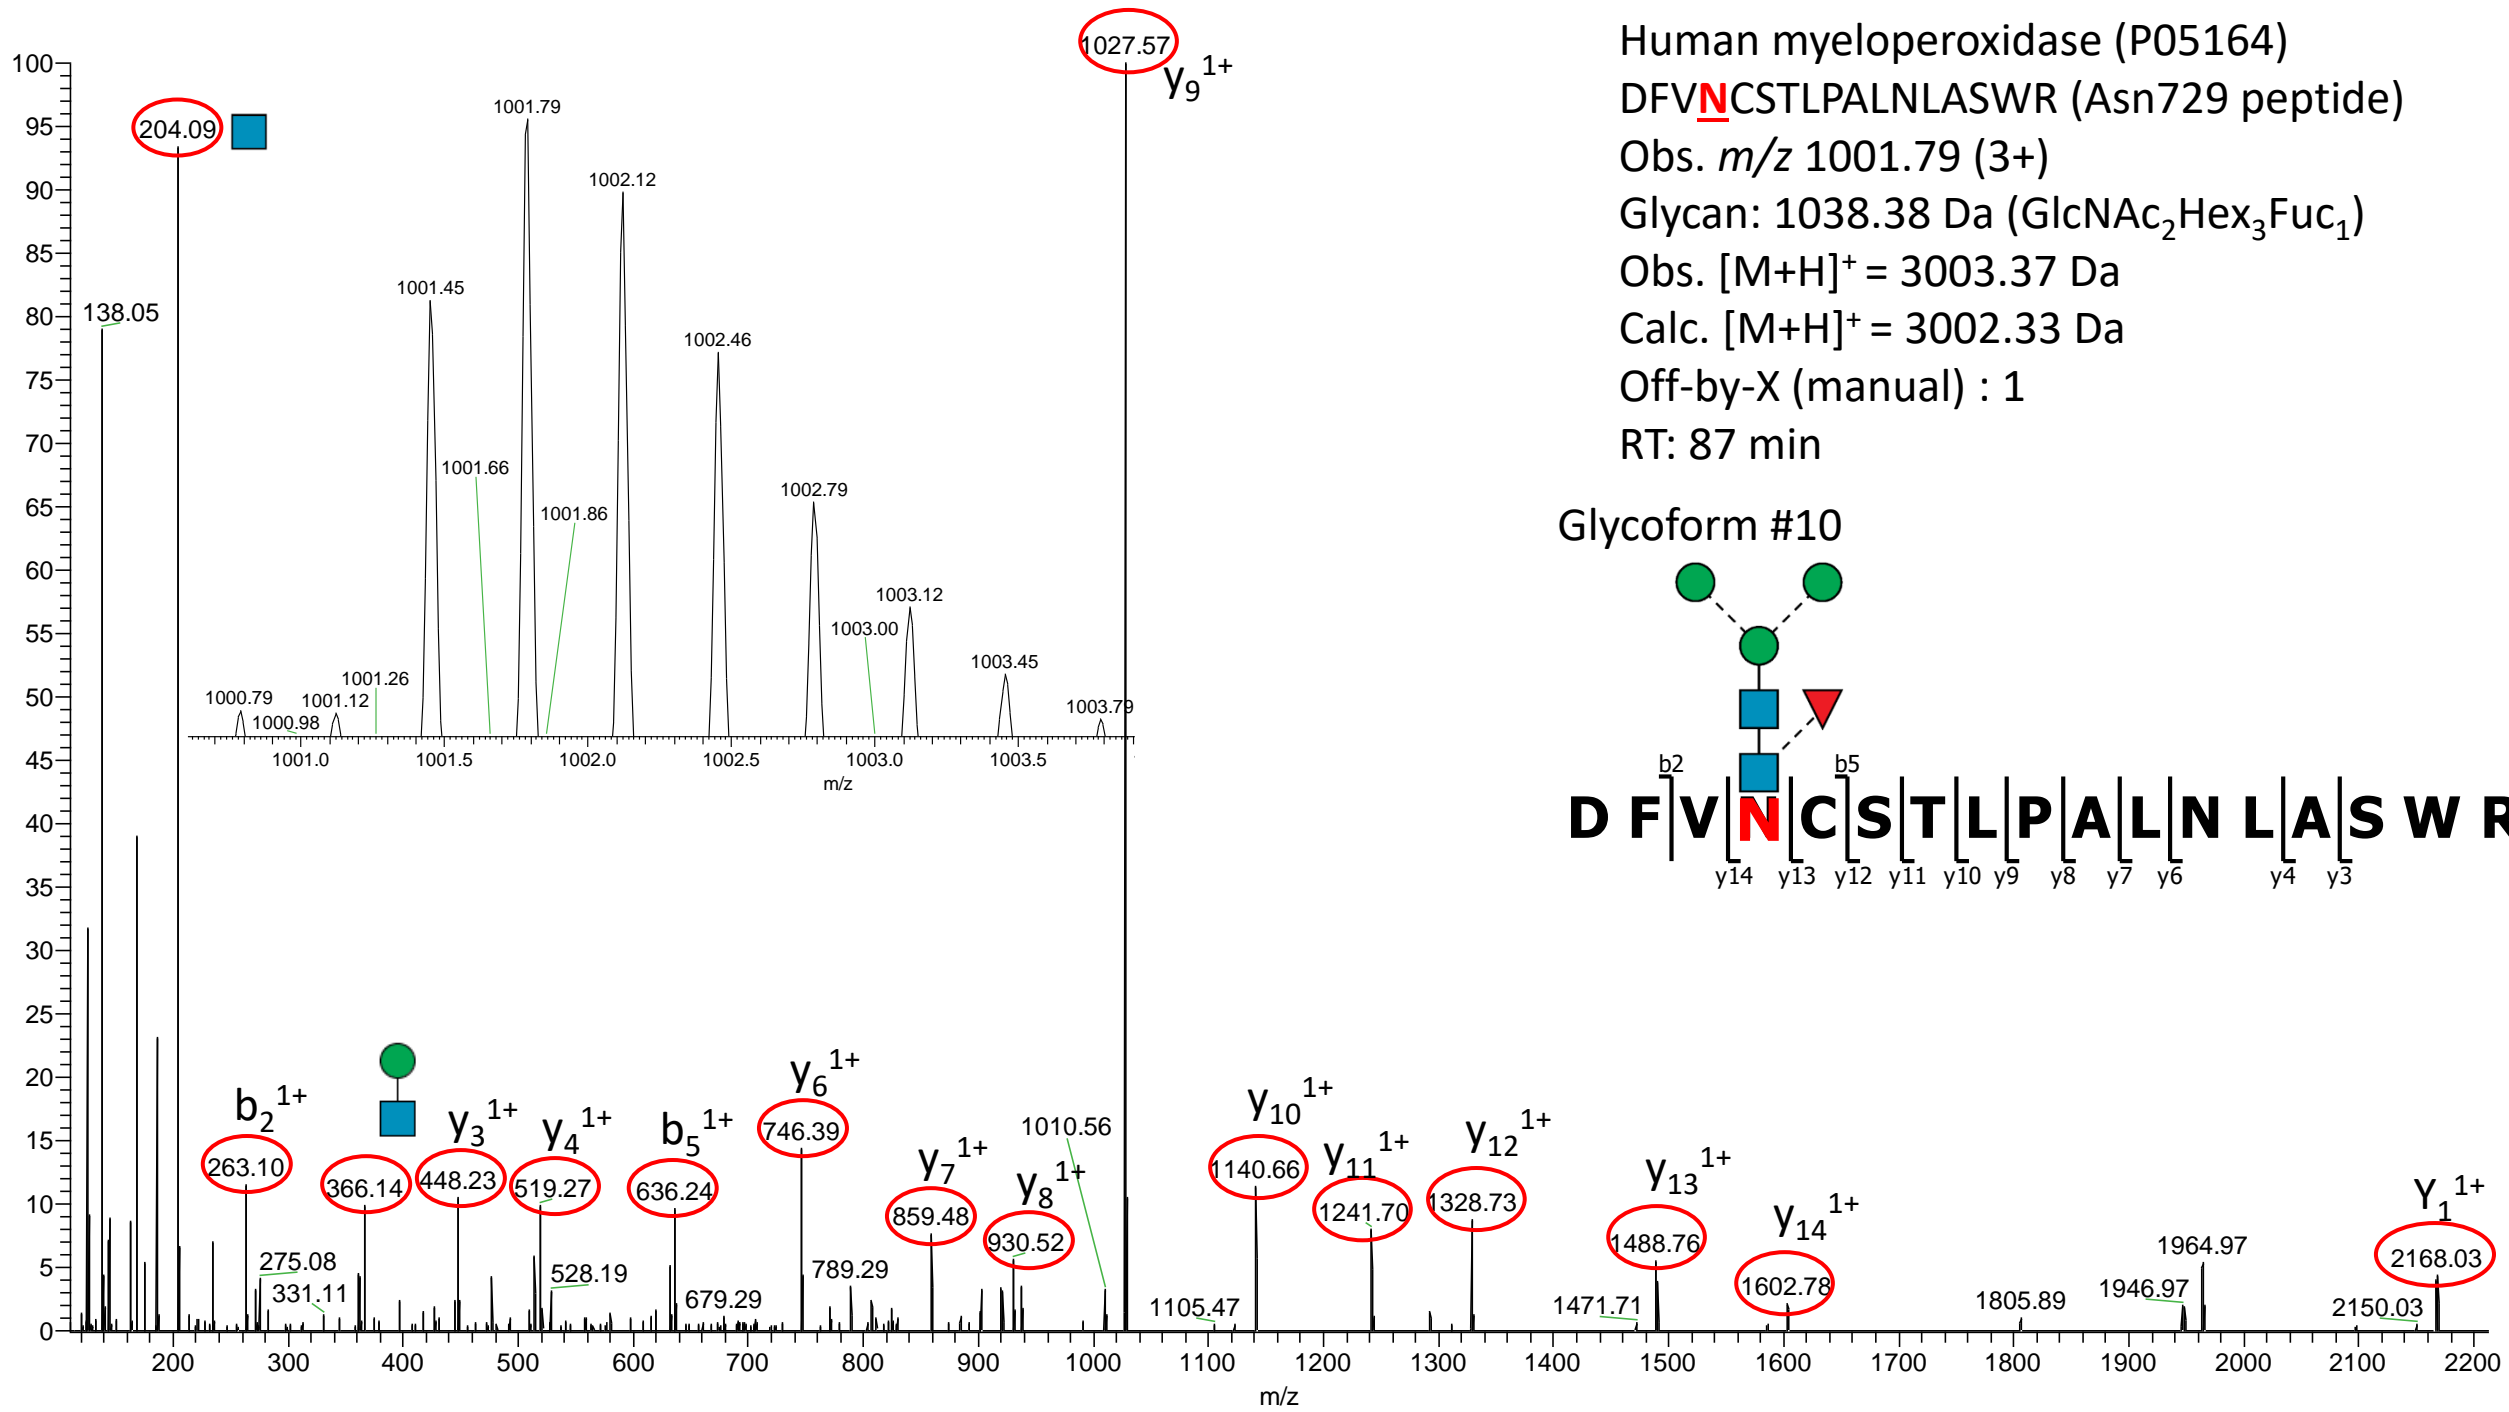

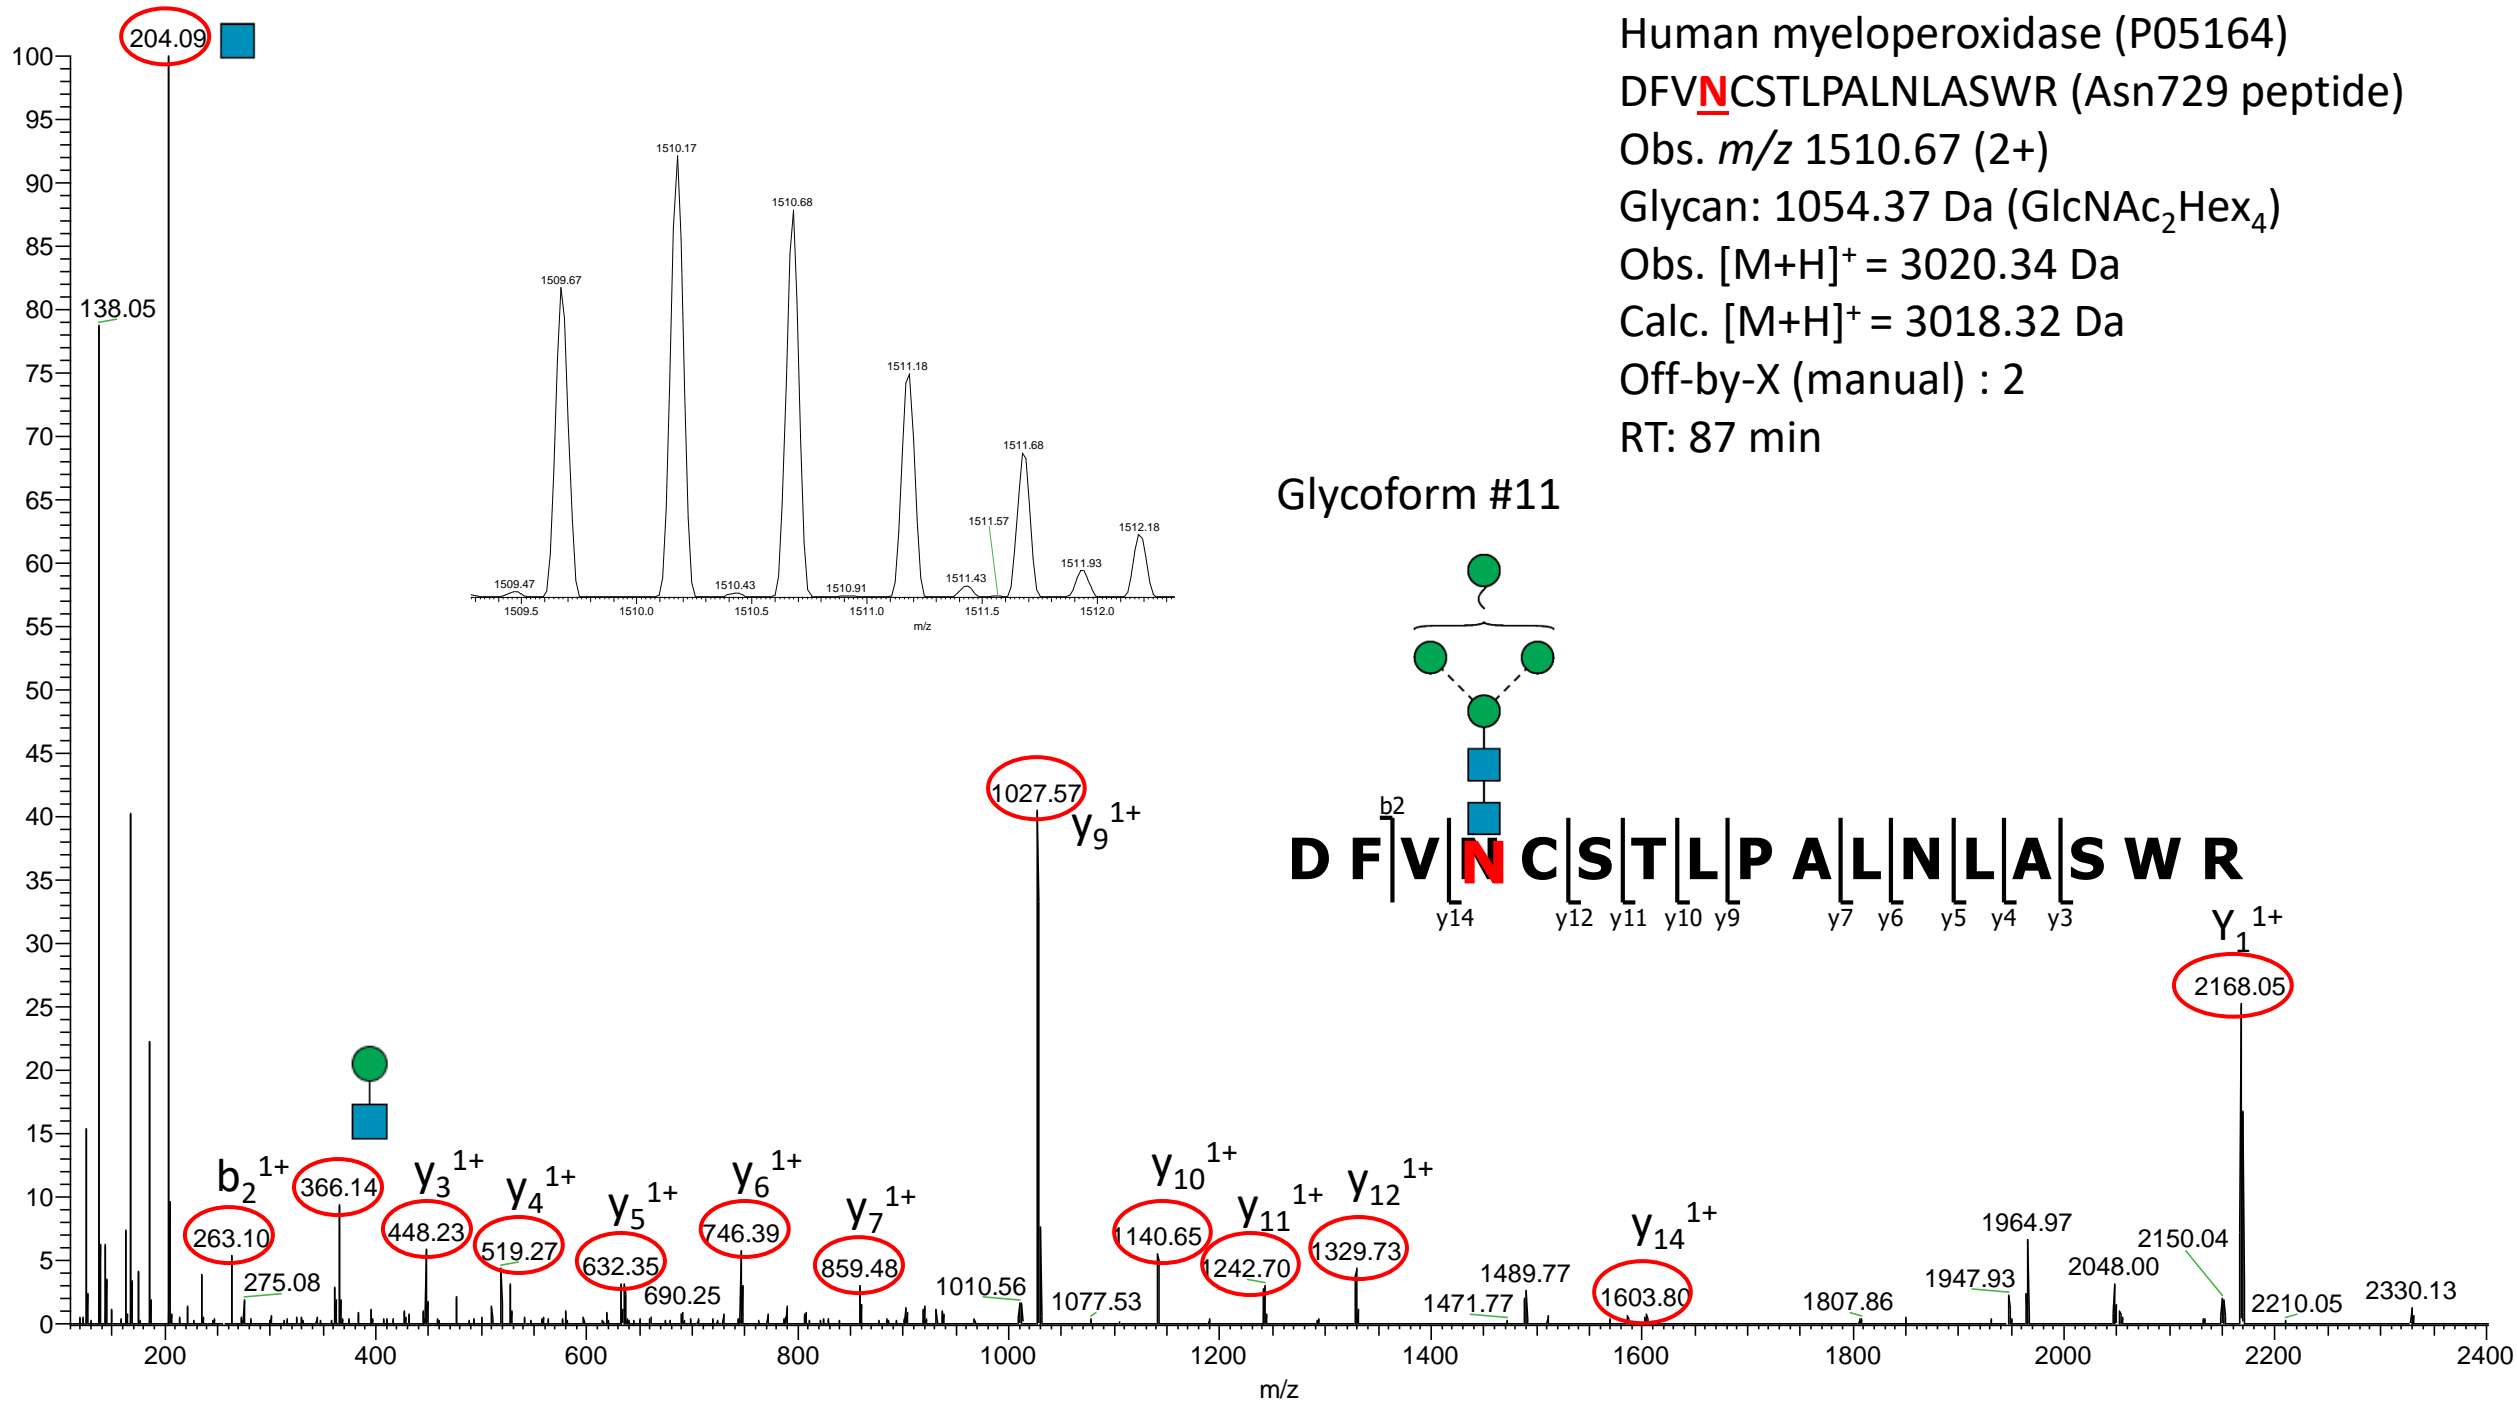

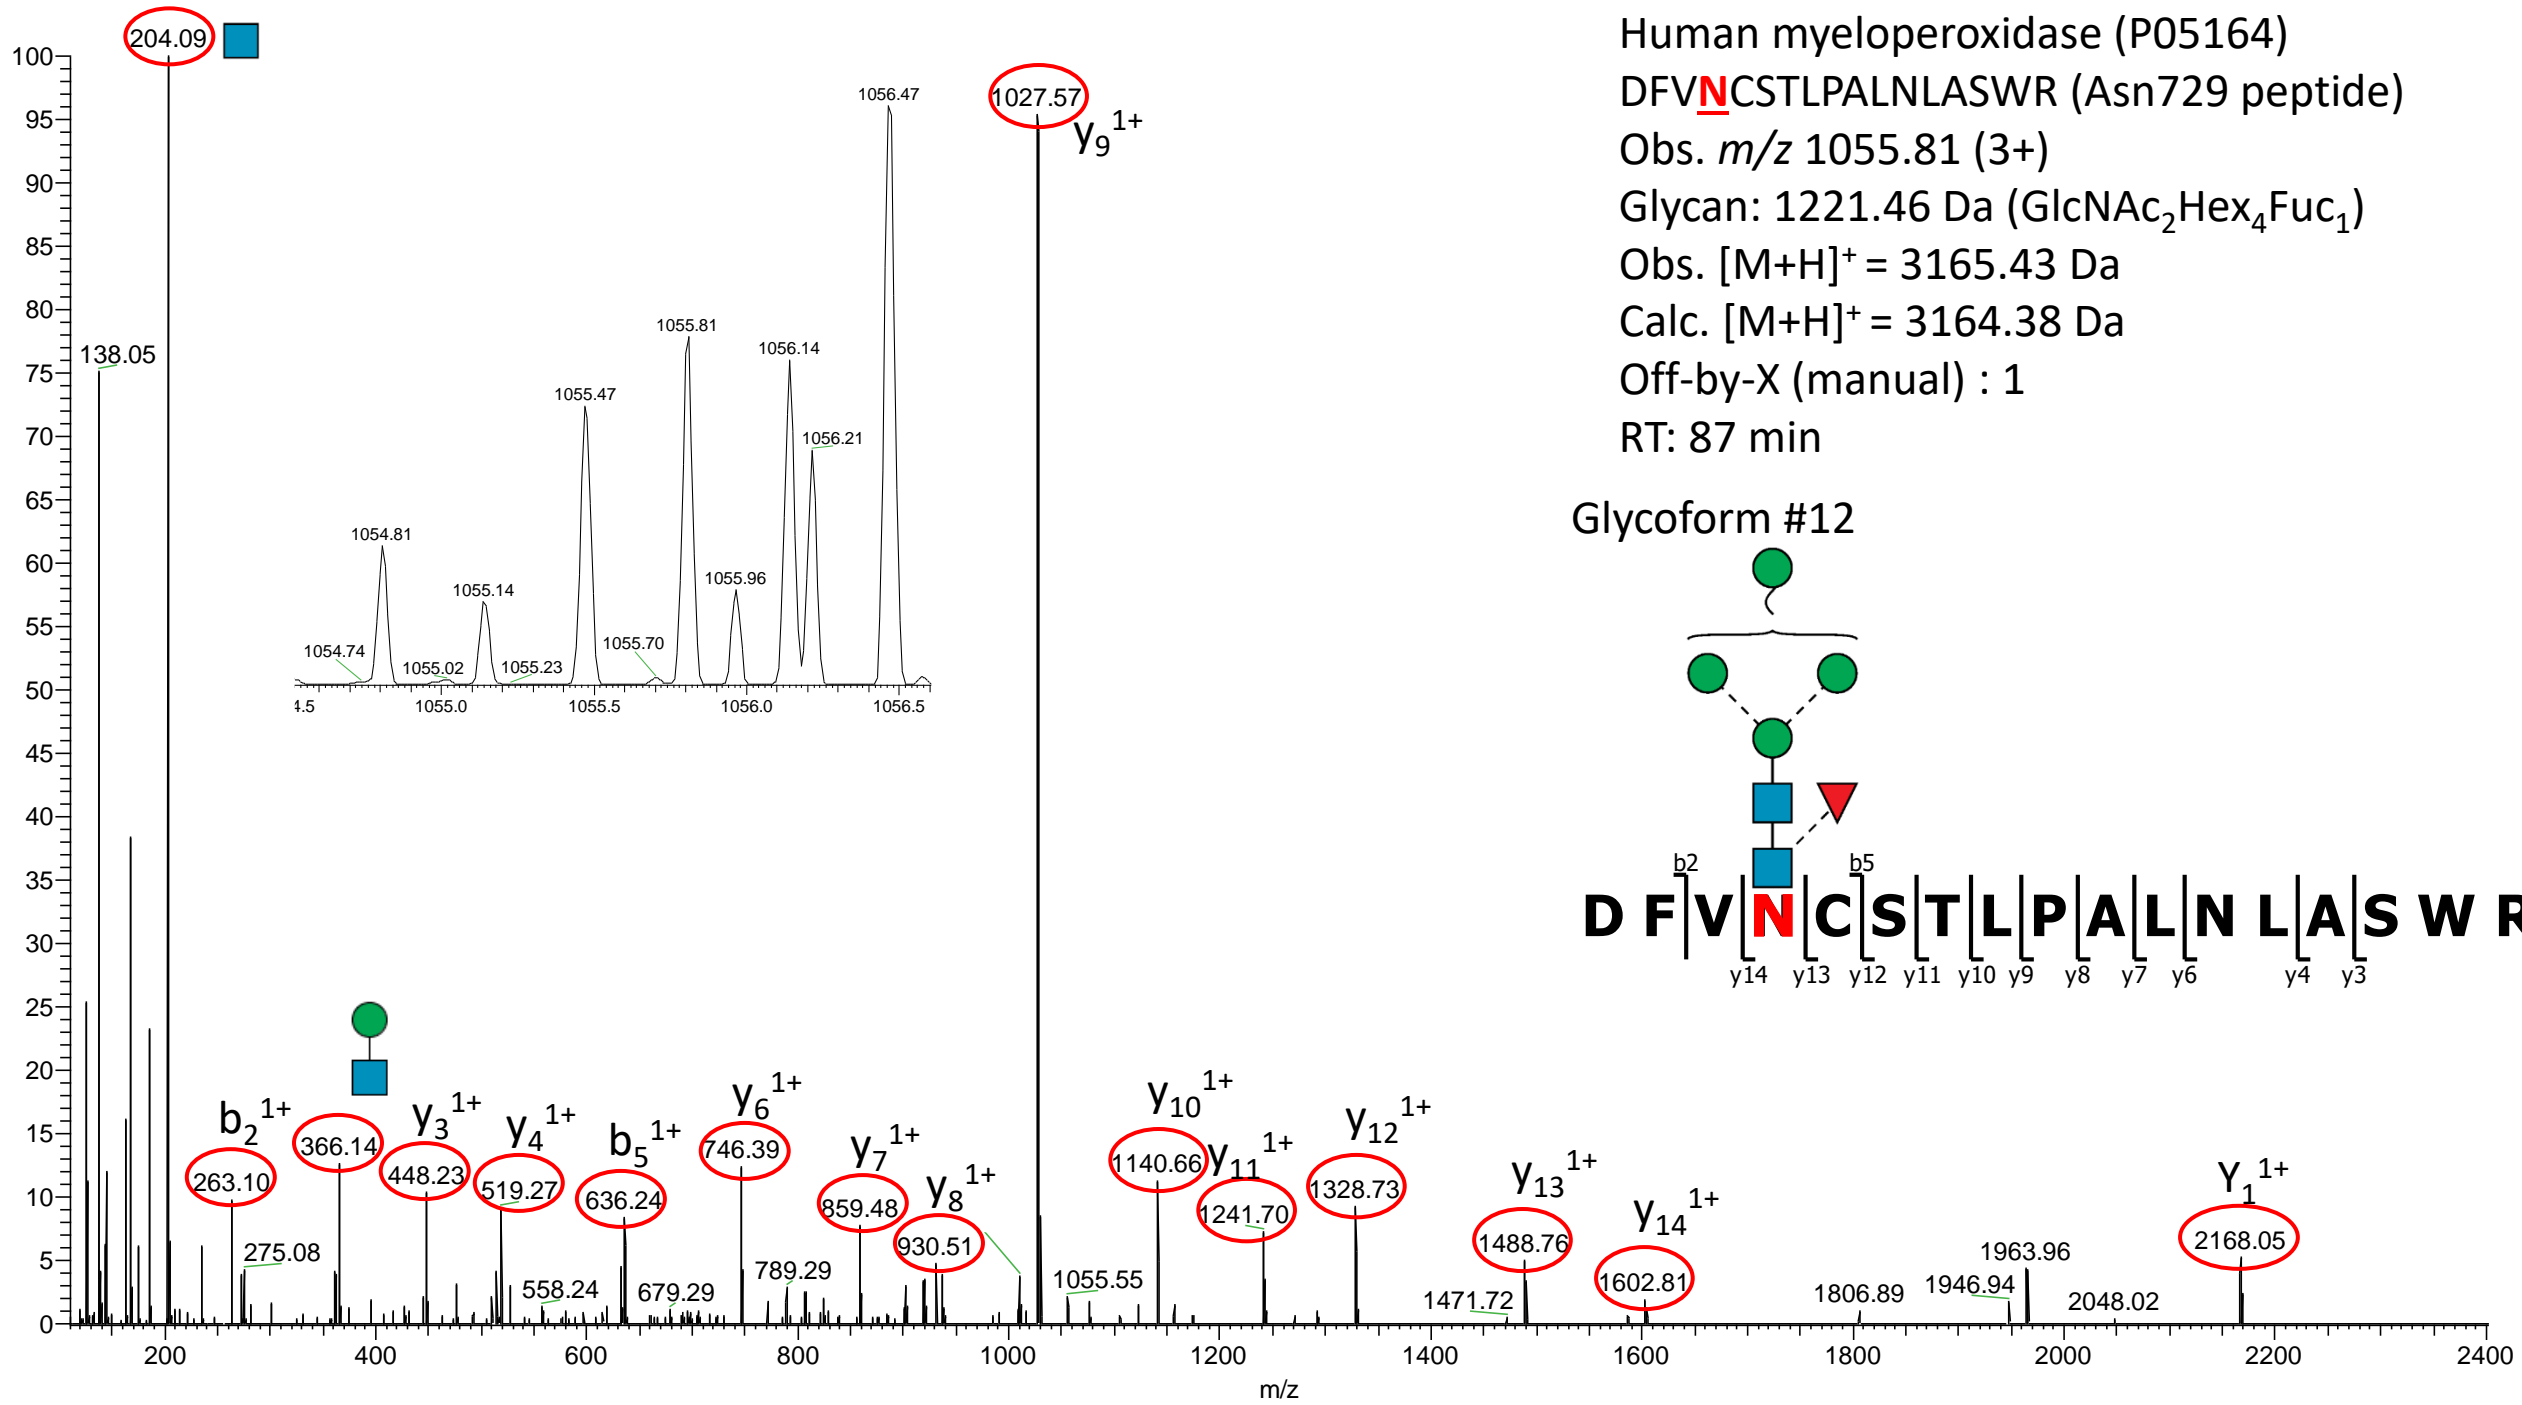

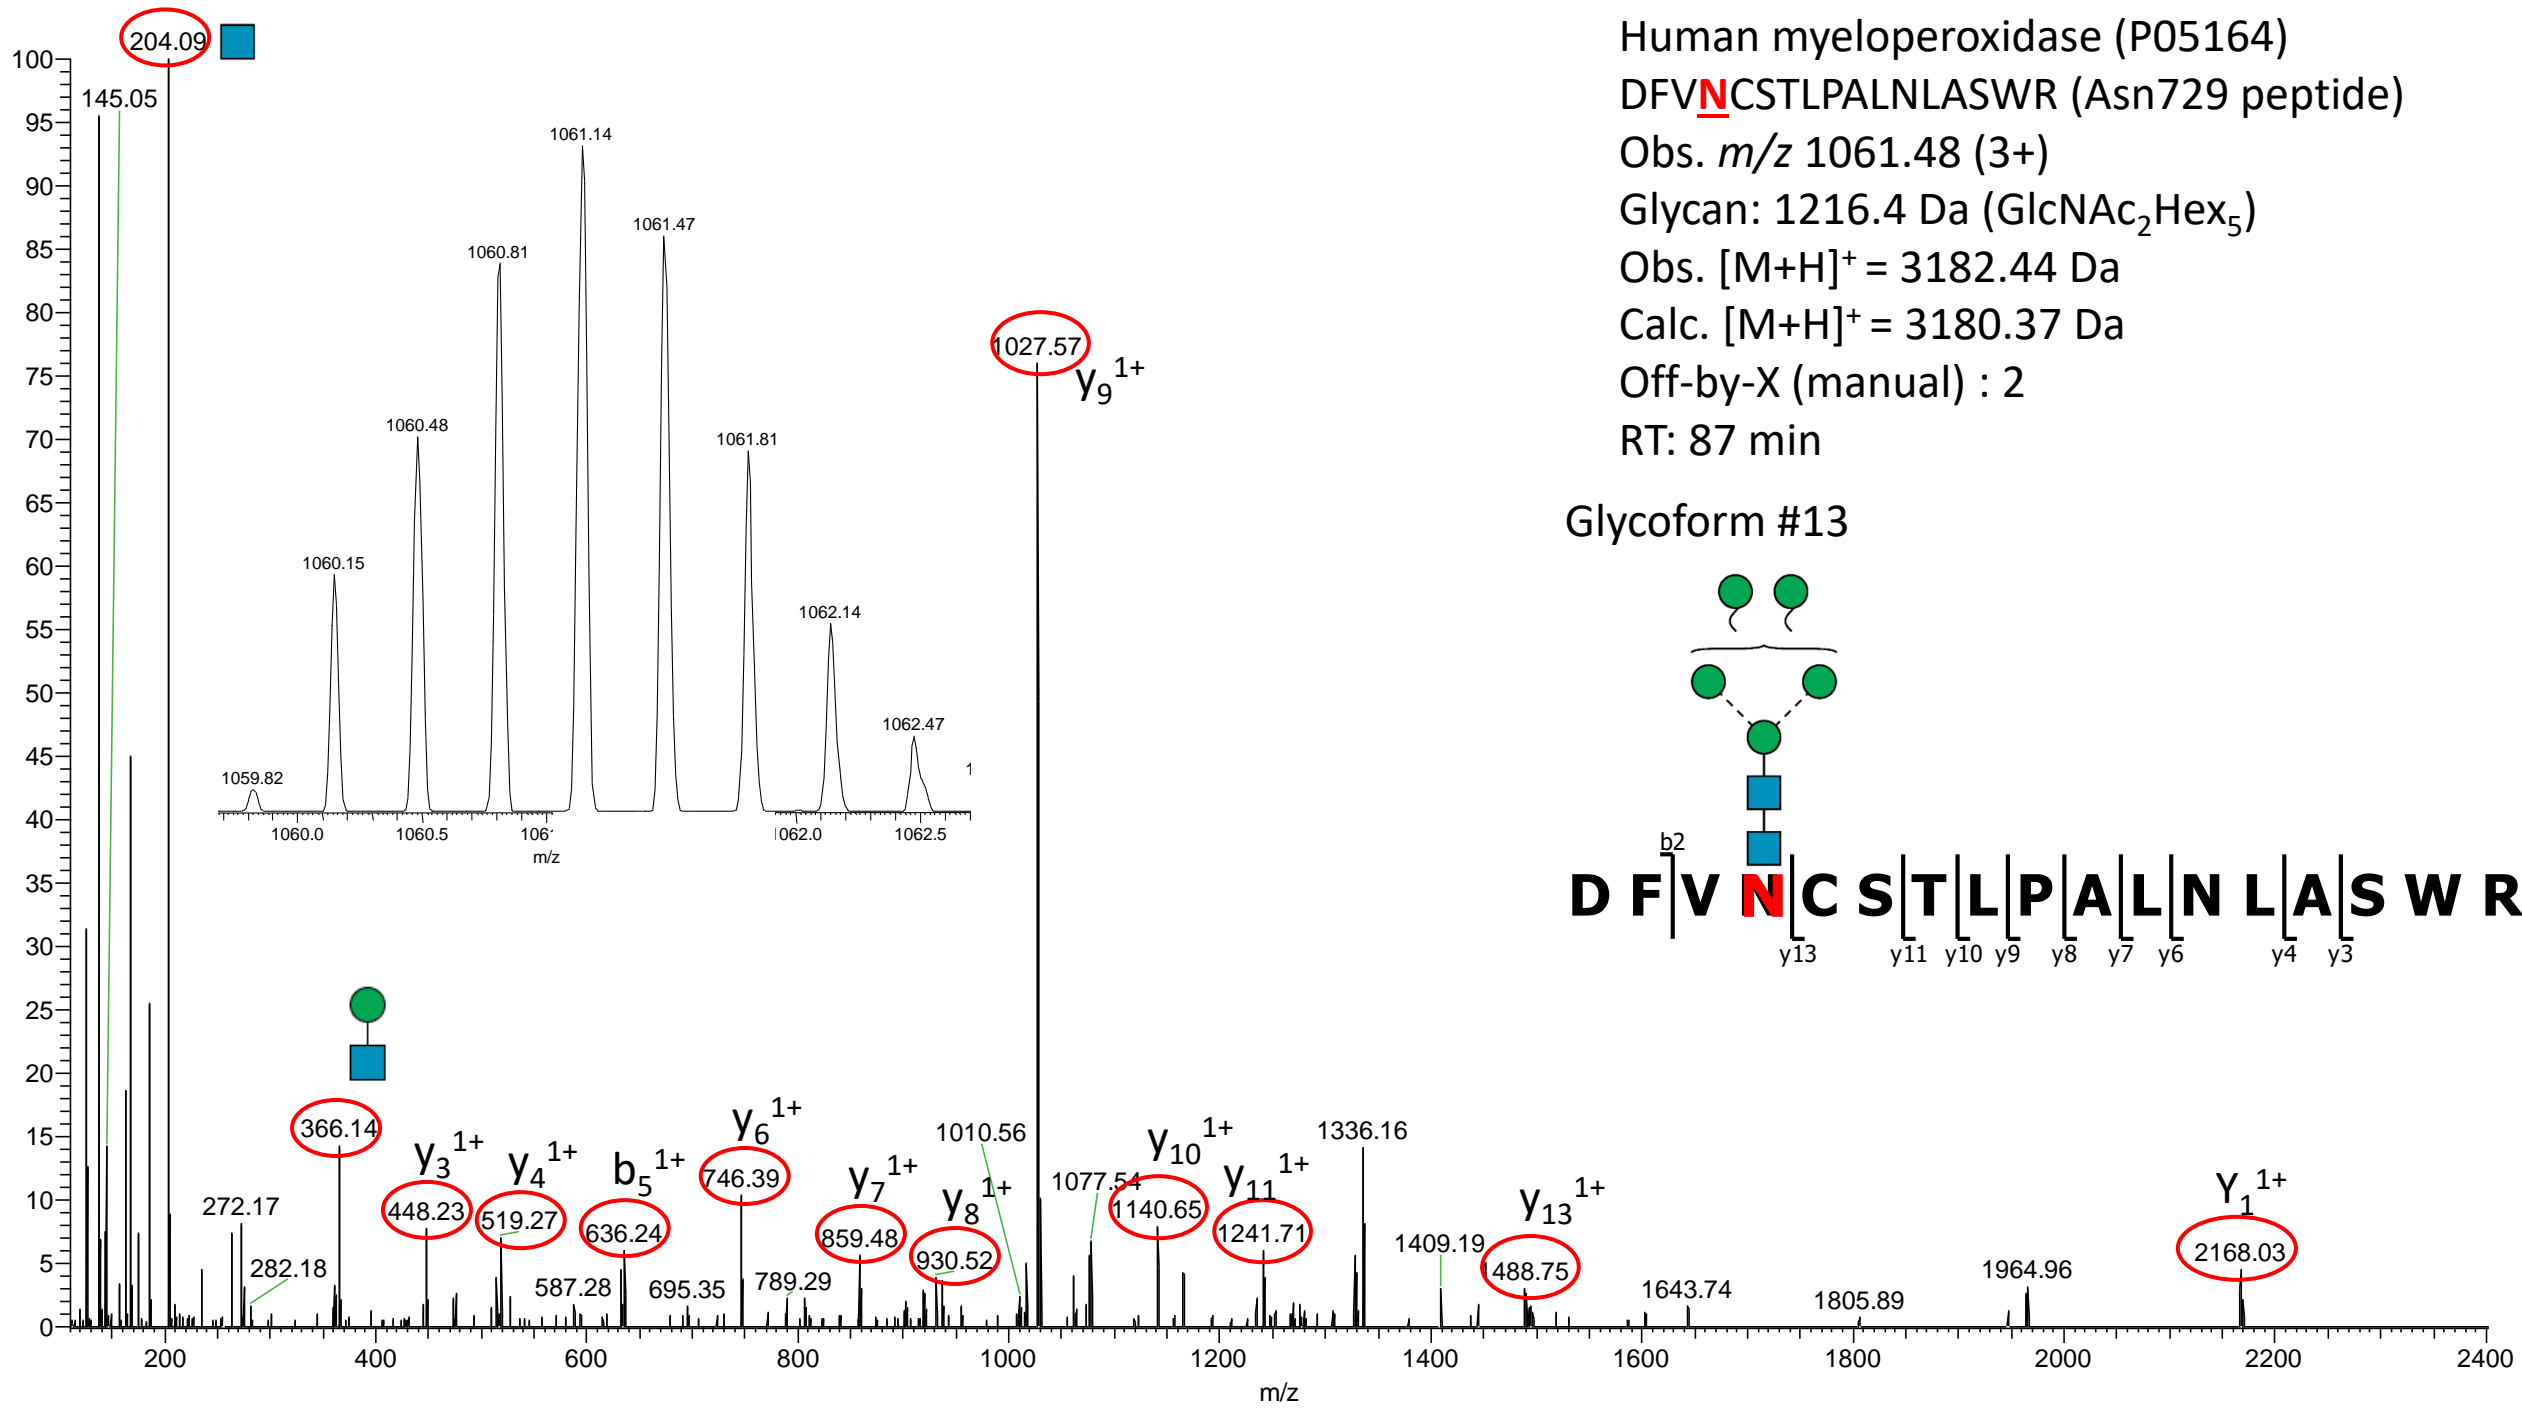

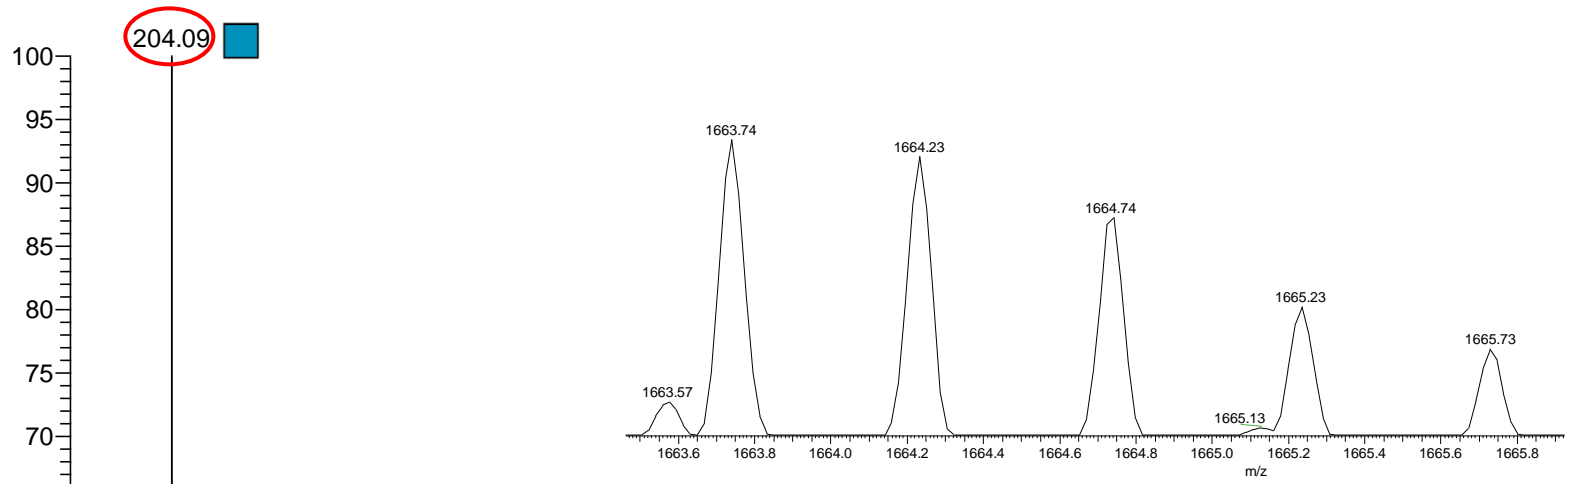

Human myeloperoxidase (P05164)  
 DFVNCSTLPALNLSWR (Asn729 peptide)  
 Obs.  $m/z$  1664.73 (2+)  
 Glycan: 1362.481 Da (GlcNAc<sub>2</sub>Hex<sub>5</sub>Fuc<sub>1</sub>)  
 Obs.  $[M+H]^+$  = 3328.46 Da  
 Calc.  $[M+H]^+$  = 3326.43 Da  
 Off-by-X (manual) : 2  
 RT: 87 min

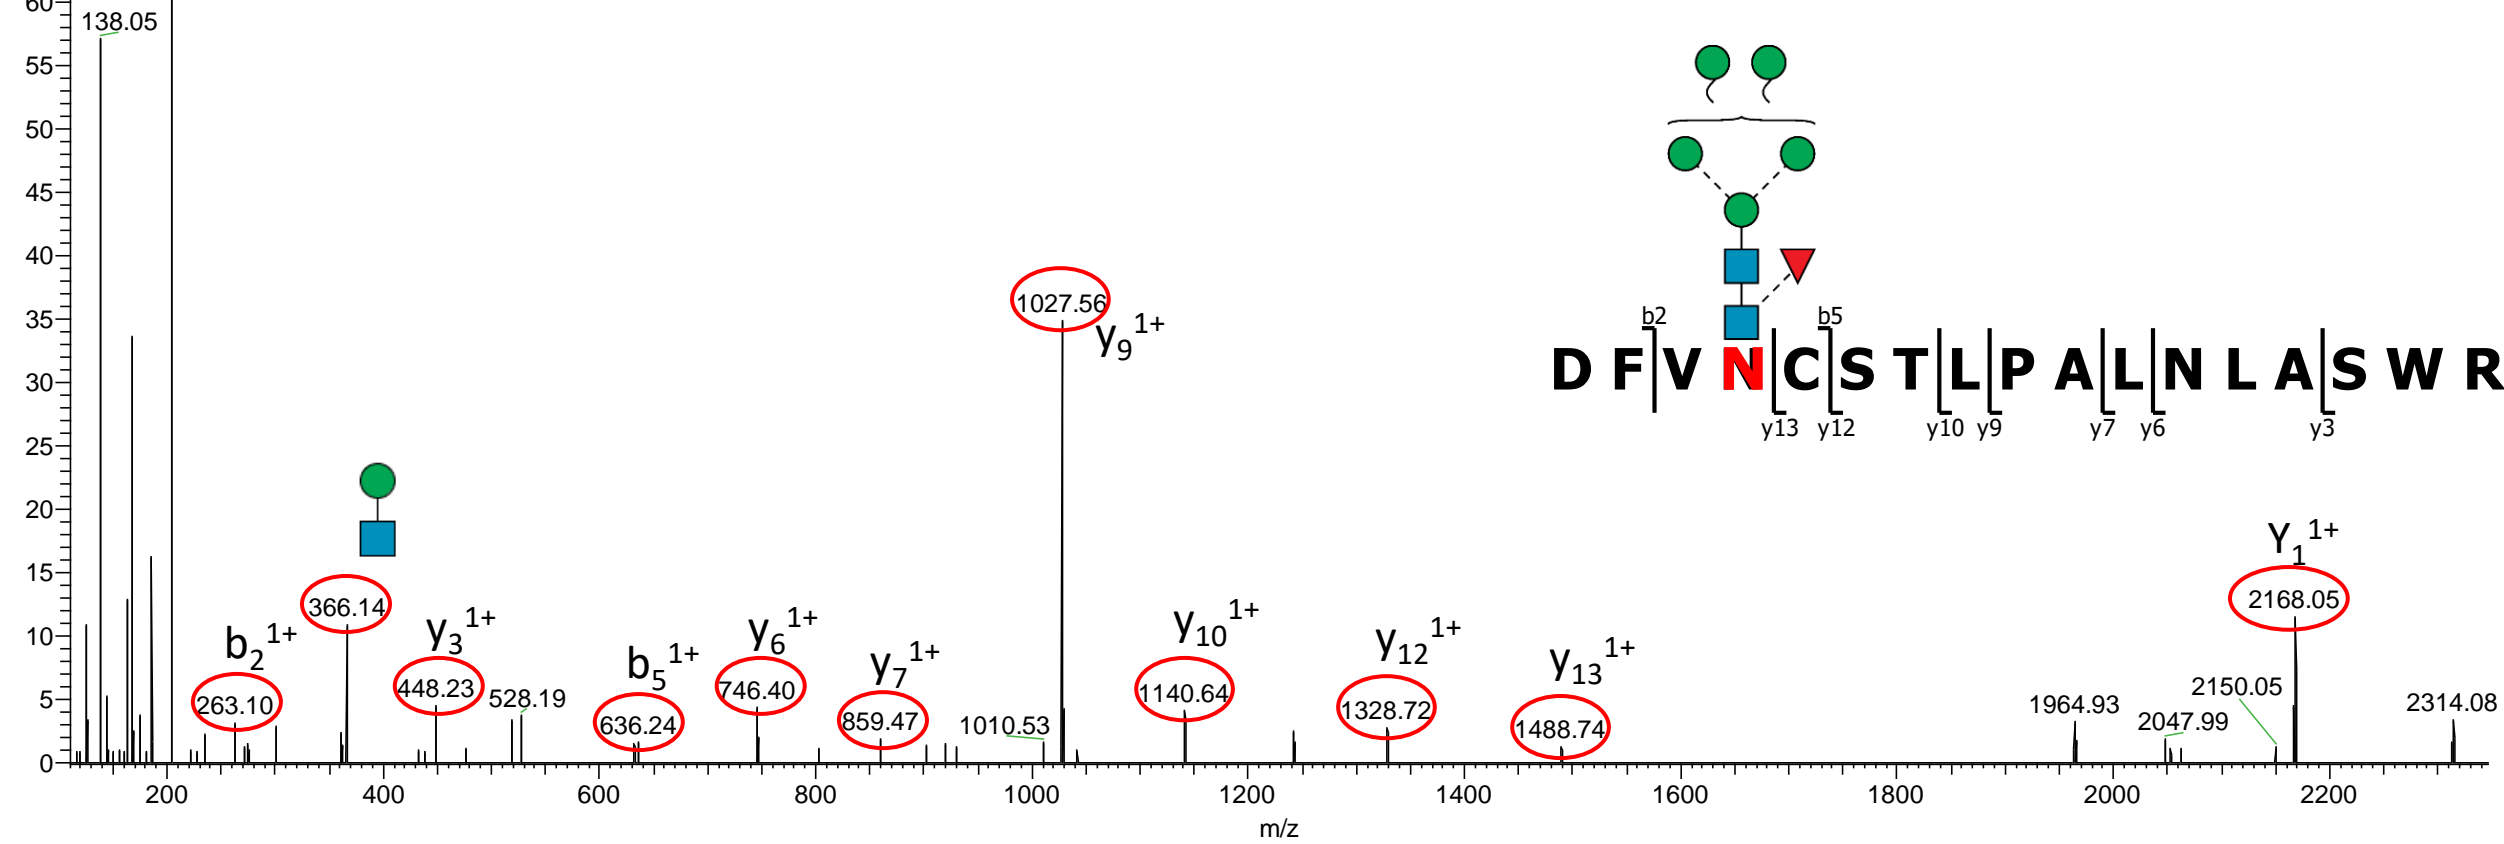

Glycoform #14

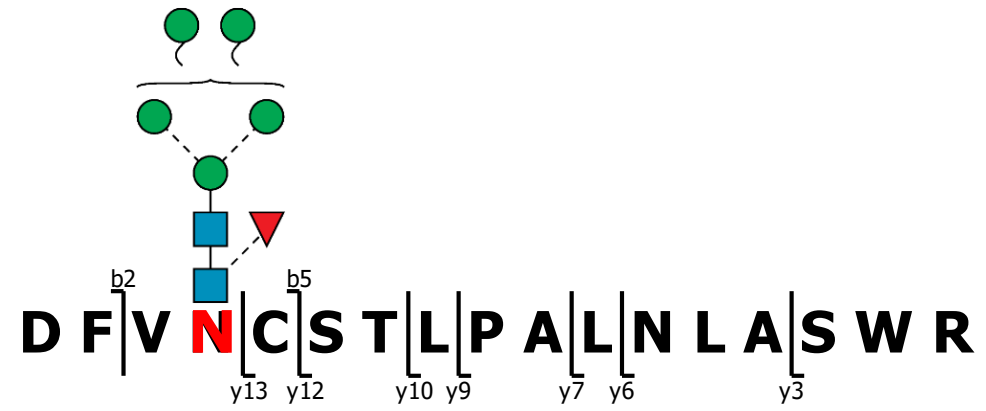

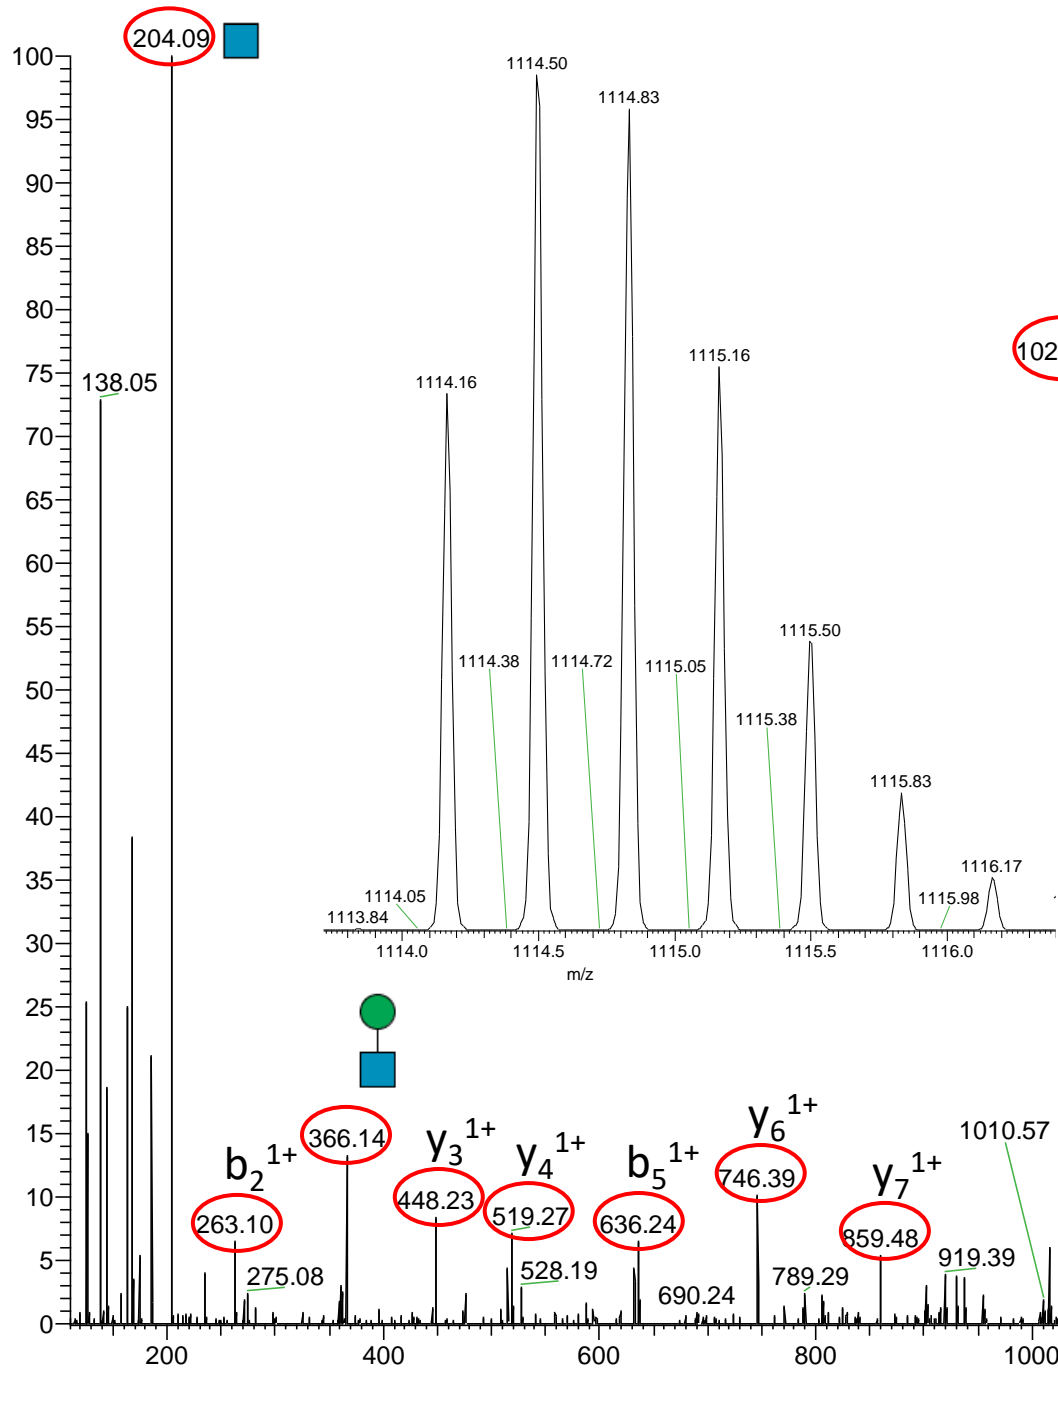

Human myeloperoxidase (P05164)  
 DFVNCSTLPALNLSWR (Asn729 peptide)  
 Obs.  $m/z$  1115.50 (3+)  
 Glycan: 1378.48 Da (GlcNAc<sub>2</sub>Hex<sub>6</sub>)  
 Obs.  $[M+H]^+$  = 3344.50 Da  
 Calc.  $[M+H]^+$  = 3342.43 Da  
 Off-by-X (manual) : 2  
 RT: 87 min

Glycoform #15

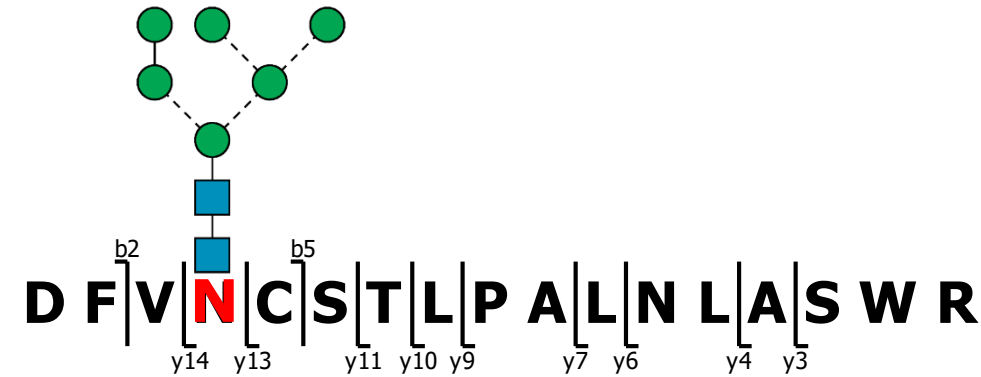

D F V N C S T L P A L N L A S W R  
 y<sub>14</sub> y<sub>13</sub> y<sub>11</sub> y<sub>10</sub> y<sub>9</sub> y<sub>7</sub> y<sub>6</sub> y<sub>4</sub> y<sub>3</sub>  
 b<sub>2</sub> b<sub>5</sub>

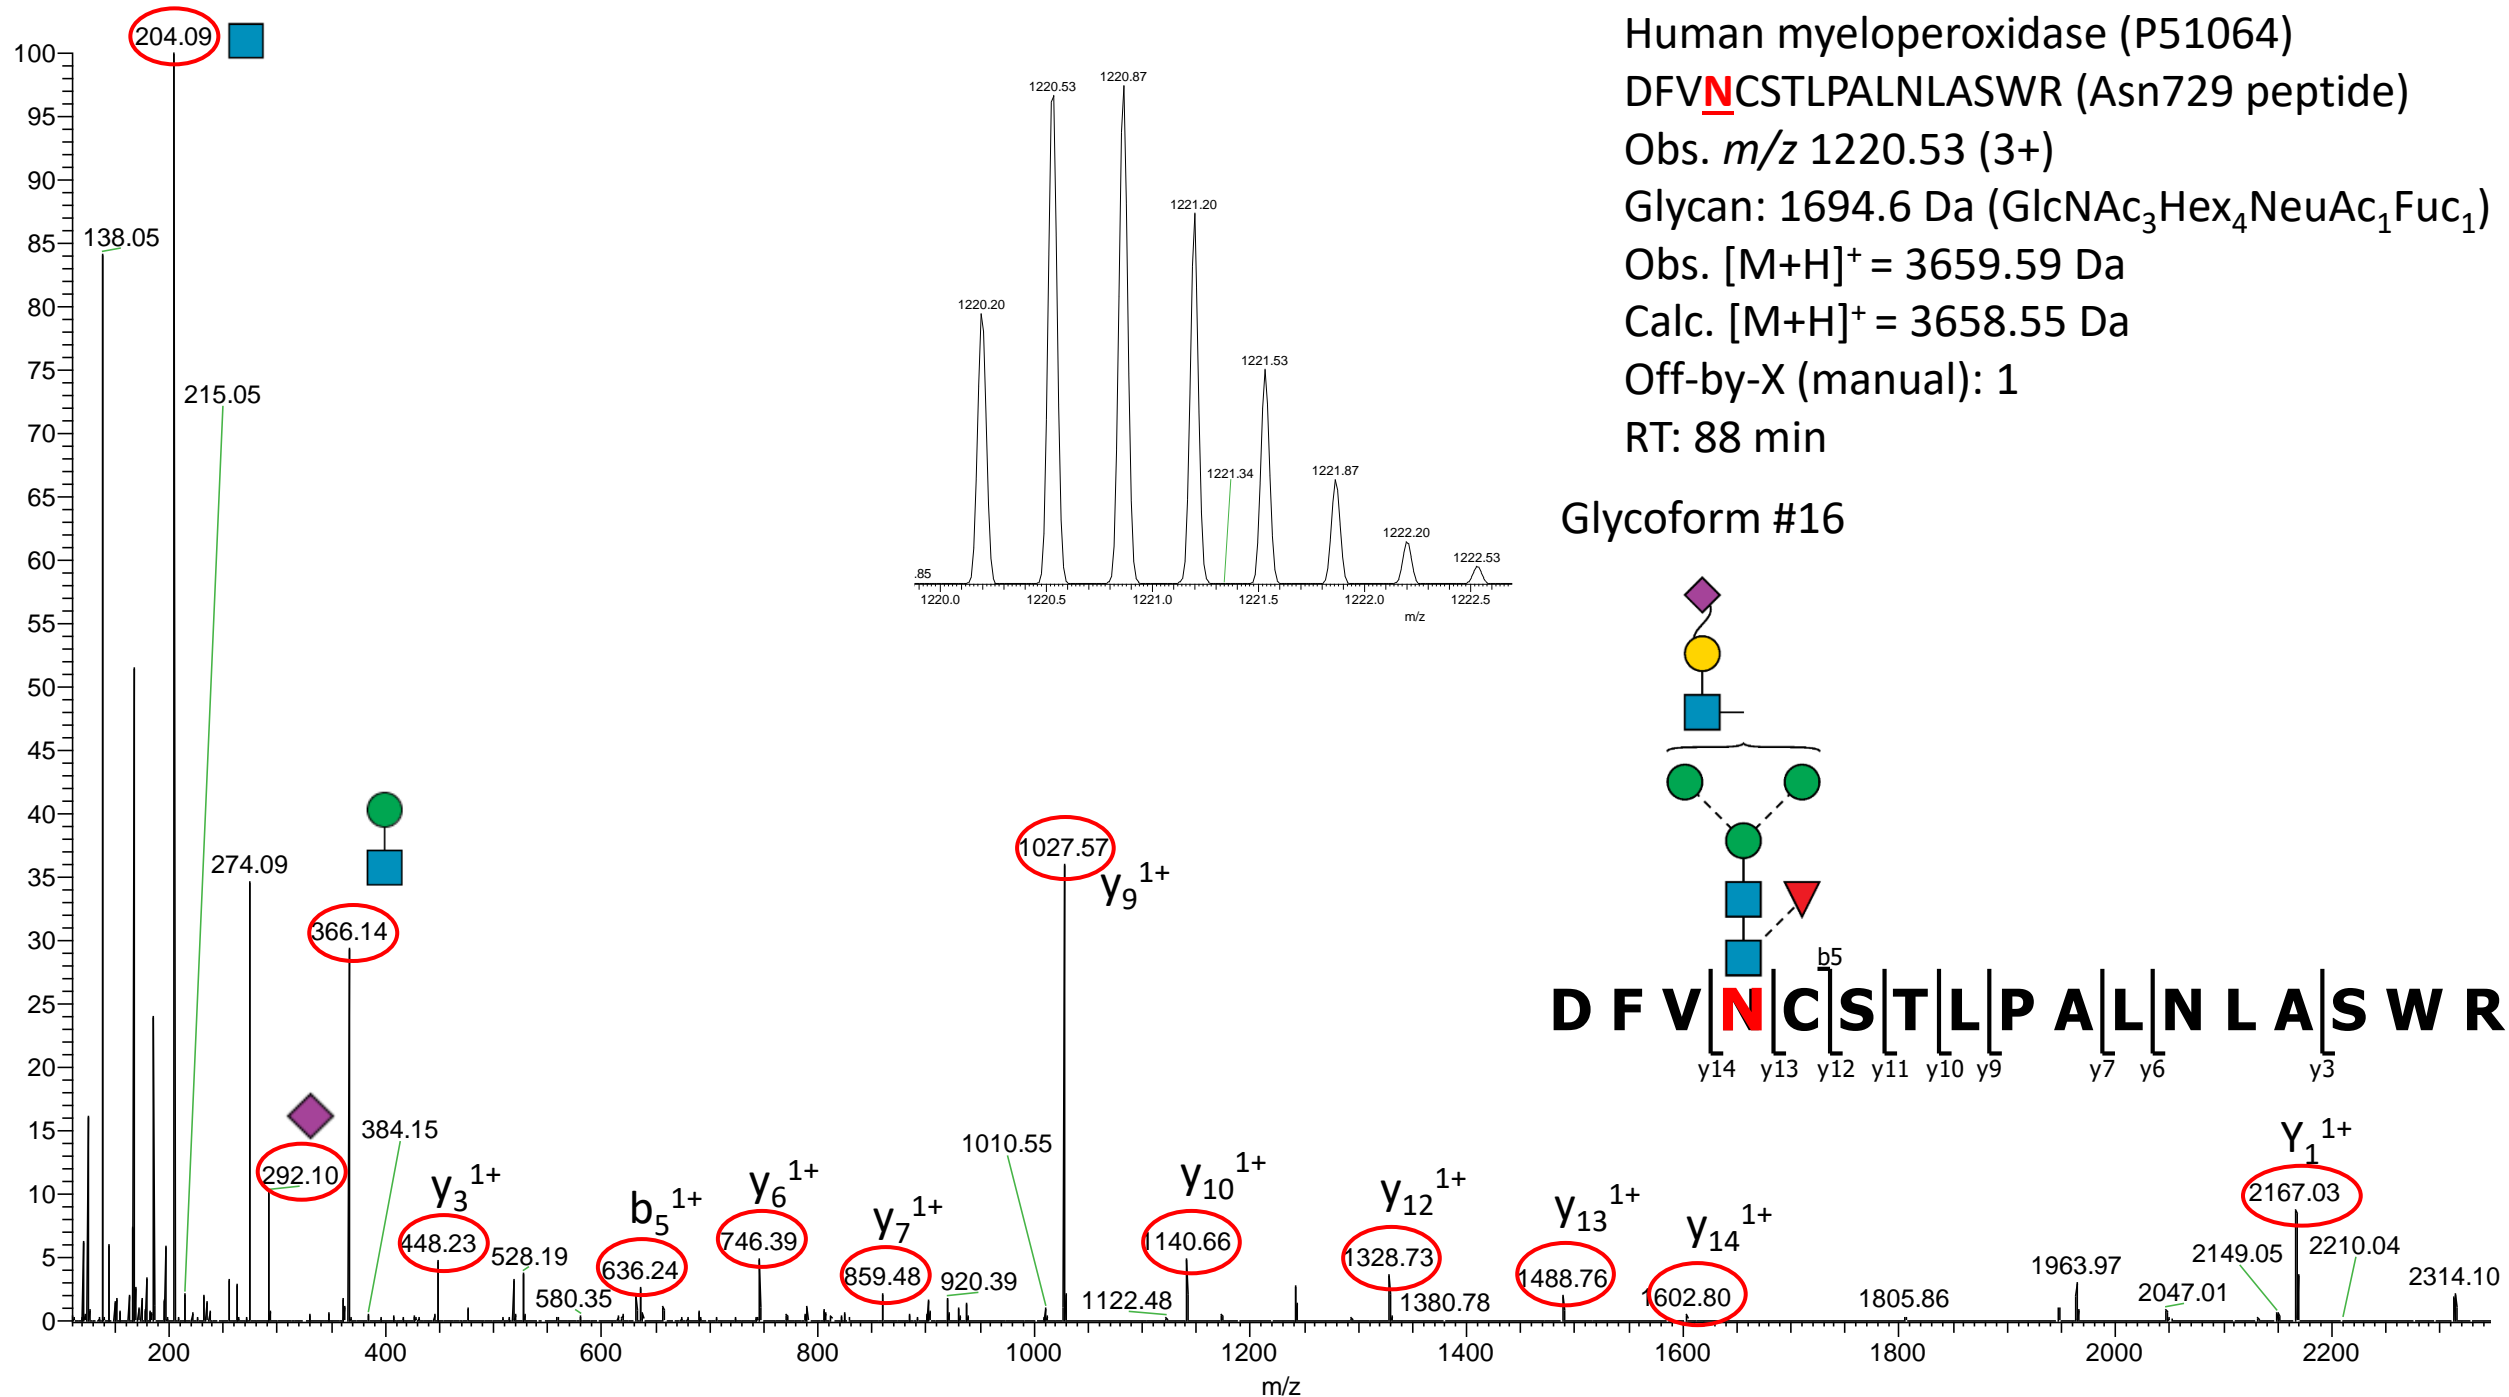

204.09

138.05

215.05

274.09

292.10

366.14

384.15

448.23

y<sub>3</sub><sup>1+</sup>

528.19

b<sub>5</sub><sup>1+</sup>

636.24

y<sub>6</sub><sup>1+</sup>

746.39

y<sub>7</sub><sup>1+</sup>

859.48

920.39

y<sub>9</sub><sup>1+</sup>

1027.57

1010.55

1122.48

y<sub>10</sub><sup>1+</sup>

140.66

y<sub>12</sub><sup>1+</sup>

1328.73

y<sub>13</sub><sup>1+</sup>

1488.76

y<sub>14</sub><sup>1+</sup>

602.80

1805.86

1963.97

2047.01

2149.05

Y<sub>1</sub><sup>1+</sup>

2167.03

2210.04

2314.10

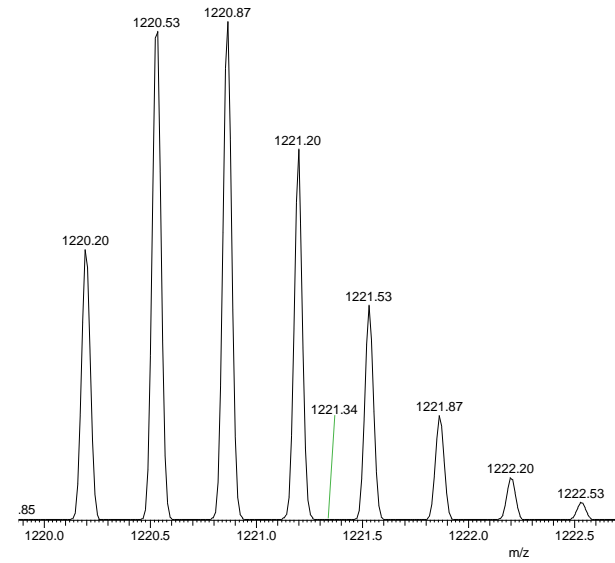

Glycoform #16

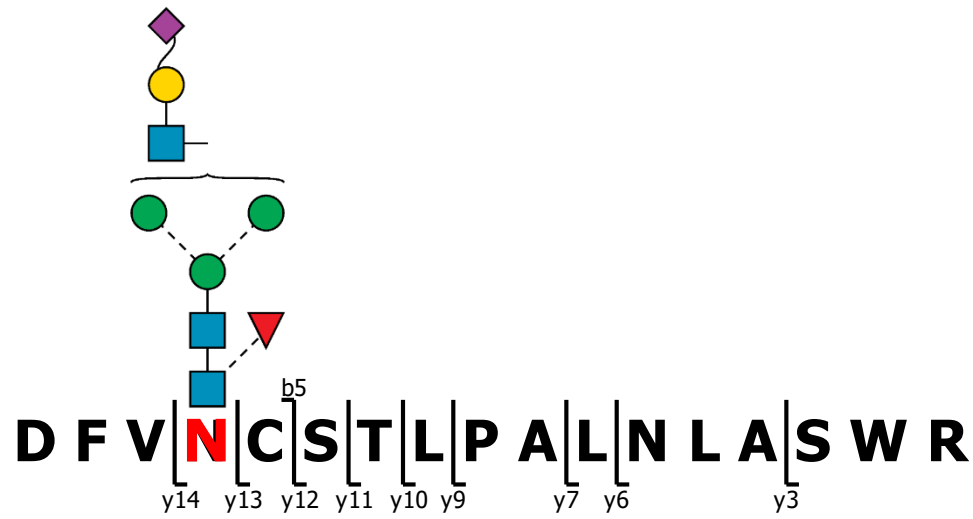

Supplement: mmc2.pdf [file mmc2.pdf]
